# Supplementary material for: Shock-Scattering Micro-Histotripsy-Aided Fine Needle Aspiration for Enhanced Biomarker Profiling and Cytopathology
Source: Research Square preprint supplement (doi:10.21203/rs.3.rs-5939271/v1), 2025-04-23
Supplement: Supplementary file 1 [file Supplementary 1 - In-vitro Cell Pellet Experiment Results.xlsx]

## Sheet: Results
Unmethylated	160V-10s	160V-30s	160V-1min	160V-2min		Unmethylated	multi-3s	multi-10s	mutli-30s
Control CT	50	50	50	50		Control CT	50	50	50
Histo CT	41.1452	43.1915	38.878	38.2234		Histo CT	40.7912	39.8176	40.274
delta CT	-8.85482	-6.80852	-11.122	-11.7766		delta CT	-9.20884	-10.1824	-9.72601
delta conc.	462.984	112.09	2228.79	3508.38		delta conc.	591.75	1162.04	846.879
			Ln(Conc.)	-23.0455	*interpolation from standard curve			Ln(Conc.)	-24.4264	*interpolation from standard curve
			DNA concentration (ng/ul)	0				DNA concentration (ng/ul)	0
			copies/ul	0.803752	(ng/ul) / (ng/copy)			copies/ul	0.202014	(ng/ul) / (ng/copy)
			total copies	1808.44				total copies	454.531
Methylated	160V-10s	160V-30s	160V-1min	160V-2min		Methylated	multi-3s	multi-10s	mutli-30s
Control CT	43.2535	43.2535	43.2535	43.2535		Control CT	50	50	50
Histo CT	36.8913	35.8433	33.4047	32.9852		Histo CT	35.1728	34.3232	33.4332
delta CT	-6.36215	-7.41021	-9.84875	-10.2683		delta CT	-14.8272	-15.6768	-16.5668
delta conc.	82.262	170.096	922.084	1233.3		delta conc.	29069.5	52383.8	97077.2
			Ln(Conc.)	-20.1116	*interpolation from standard curve			Ln(Conc.)	-16.7287	*interpolation from standard curve
			DNA concentration (ng/ul)	1.84349e-09				DNA concentration (ng/ul)	5.43039e-08
			copies/ul	15.1106	(ng/ul) / (ng/copy)			copies/ul	445.114	(ng/ul) / (ng/copy)
			total copies	33998.8				total copies	1.00151e+06
Standards	Ln	Methyl	Unmethyl
1e-05	-11.5129	24.2807	21.413
1e-07	-16.1181	32.0049	28.8898
1e-09	-20.7233	39.956	33.4746
1e-11	-25.3284	50	40.0971
1e-13	-29.9336		50
weight/copy of amplicon (ng)	1.22e-10
Well	Well Position	Omit	Sample Name	Target Name	Task	Reporter	Quencher	CT	Ct Mean	Ct SD	Quantity	Quantity Mean	Quantity SD	Automatic Ct Threshold	Ct Threshold	Automatic Baseline	Baseline Start	Baseline End	Comments	Y-Intercept	R(superscript 2)	Slope	Efficiency	HIGHSD	NOAMP	EXPFAIL	THOLDFAIL
1	A1	FALSE	160-C	Unmethylated	UNKNOWN	FAM	NFQ-MGB	Undetermined						TRUE	0.04	TRUE	1	60		0	0	0	-100	N	Y	Y	Y
2	A2	FALSE	160-10s	Unmethylated	UNKNOWN	FAM	NFQ-MGB	40.7294	41.1452	0.587976	0			TRUE	0.04	TRUE	1	60		0	0	0	-100	Y	N	N	Y
3	A3	FALSE	160-30s	Unmethylated	UNKNOWN	FAM	NFQ-MGB	43.1298	43.1915	0.0872581	0			TRUE	0.04	TRUE	1	60		0	0	0	-100	N	N	N	Y
4	A4	FALSE	160-1m	Unmethylated	UNKNOWN	FAM	NFQ-MGB	39.1744	38.878	0.419186	0			TRUE	0.04	TRUE	1	60		0	0	0	-100	N	N	N	Y
5	A5	FALSE	160-2m	Unmethylated	UNKNOWN	FAM	NFQ-MGB	38.3111	38.2234	0.12404	0			TRUE	0.04	TRUE	1	60		0	0	0	-100	N	N	N	Y
6	A6	FALSE	Standard	Unmethylated	STANDARD	FAM	NFQ-MGB	21.413	30.9686	7.85793	1			TRUE	0.04	TRUE	1	60		0	0	0	-100	Y	N	N	Y
7	A7	FALSE	Standard	Unmethylated	STANDARD	FAM	NFQ-MGB	28.8898	30.9686	7.85793	1			TRUE	0.04	TRUE	1	60		0	0	0	-100	Y	N	N	Y
8	A8	FALSE	Standard	Unmethylated	STANDARD	FAM	NFQ-MGB	33.4746	30.9686	7.85793	1			TRUE	0.04	TRUE	1	60		0	0	0	-100	Y	N	N	Y
9	A9	FALSE	Standard	Unmethylated	STANDARD	FAM	NFQ-MGB	40.0971	30.9686	7.85793	1			TRUE	0.04	TRUE	1	60		0	0	0	-100	Y	N	N	Y
10	A10	FALSE	Standard	Unmethylated	STANDARD	FAM	NFQ-MGB	Undetermined	30.9686	7.85793	1			TRUE	0.04	TRUE	1	60		0	0	0	-100	N	Y	Y	Y
13	B1	FALSE	160-C	Unmethylated	UNKNOWN	FAM	NFQ-MGB	Undetermined						TRUE	0.04	TRUE	1	60		0	0	0	-100	N	Y	Y	Y
14	B2	FALSE	160-10s	Unmethylated	UNKNOWN	FAM	NFQ-MGB	41.5609	41.1452	0.587976	0			TRUE	0.04	TRUE	1	60		0	0	0	-100	Y	N	N	Y
15	B3	FALSE	160-30s	Unmethylated	UNKNOWN	FAM	NFQ-MGB	43.2532	43.1915	0.0872581	0			TRUE	0.04	TRUE	1	60		0	0	0	-100	N	N	N	Y
16	B4	FALSE	160-1m	Unmethylated	UNKNOWN	FAM	NFQ-MGB	38.5815	38.878	0.419186	0			TRUE	0.04	TRUE	1	60		0	0	0	-100	N	N	N	Y
17	B5	FALSE	160-2m	Unmethylated	UNKNOWN	FAM	NFQ-MGB	38.1357	38.2234	0.12404	0			TRUE	0.04	TRUE	1	60		0	0	0	-100	N	N	N	Y
18	B6	FALSE	Standard	Methylated	STANDARD	FAM	NFQ-MGB	24.2807	32.0805	7.83789	1			TRUE	0.04	TRUE	1	60		0	0	0	-100	Y	N	N	Y
19	B7	FALSE	Standard	Methylated	STANDARD	FAM	NFQ-MGB	32.0049	32.0805	7.83789	1			TRUE	0.04	TRUE	1	60		0	0	0	-100	Y	N	N	Y
20	B8	FALSE	Standard	Methylated	STANDARD	FAM	NFQ-MGB	39.956	32.0805	7.83789	1			TRUE	0.04	TRUE	1	60		0	0	0	-100	Y	N	N	Y
21	B9	FALSE	Standard	Methylated	STANDARD	FAM	NFQ-MGB	Undetermined	32.0805	7.83789	1			TRUE	0.04	TRUE	1	60		0	0	0	-100	N	Y	Y	Y
22	B10	FALSE	Standard	Methylated	STANDARD	FAM	NFQ-MGB	Undetermined	32.0805	7.83789	1			TRUE	0.04	TRUE	1	60		0	0	0	-100	N	Y	Y	Y
25	C1	FALSE	160-C	Methylated	UNKNOWN	FAM	NFQ-MGB	40.6143	43.2535	3.73237	0			TRUE	0.04	TRUE	1	60		0	0	0	-100	Y	N	N	Y
26	C2	FALSE	160-10s	Methylated	UNKNOWN	FAM	NFQ-MGB	36.731	36.8913	0.226676	0			TRUE	0.04	TRUE	1	60		0	0	0	-100	N	N	N	Y
27	C3	FALSE	160-30s	Methylated	UNKNOWN	FAM	NFQ-MGB	35.7839	35.8433	0.0839862	0			TRUE	0.04	TRUE	1	60		0	0	0	-100	N	N	N	Y
28	C4	FALSE	160-1m	Methylated	UNKNOWN	FAM	NFQ-MGB	33.1337	33.4047	0.383273	0			TRUE	0.04	TRUE	1	60		0	0	0	-100	N	N	N	Y
29	C5	FALSE	160-2m	Methylated	UNKNOWN	FAM	NFQ-MGB	33.0144	32.9852	0.0413403	0			TRUE	0.04	TRUE	1	60		0	0	0	-100	N	N	N	Y
37	D1	FALSE	160-C	Methylated	UNKNOWN	FAM	NFQ-MGB	45.8926	43.2535	3.73237	0			TRUE	0.04	TRUE	1	60		0	0	0	-100	Y	N	N	Y
38	D2	FALSE	160-10s	Methylated	UNKNOWN	FAM	NFQ-MGB	37.0516	36.8913	0.226676	0			TRUE	0.04	TRUE	1	60		0	0	0	-100	N	N	N	Y
39	D3	FALSE	160-30s	Methylated	UNKNOWN	FAM	NFQ-MGB	35.9026	35.8433	0.0839862	0			TRUE	0.04	TRUE	1	60		0	0	0	-100	N	N	N	Y
40	D4	FALSE	160-1m	Methylated	UNKNOWN	FAM	NFQ-MGB	33.6757	33.4047	0.383273	0			TRUE	0.04	TRUE	1	60		0	0	0	-100	N	N	N	Y
41	D5	FALSE	160-2m	Methylated	UNKNOWN	FAM	NFQ-MGB	32.9559	32.9852	0.0413403	0			TRUE	0.04	TRUE	1	60		0	0	0	-100	N	N	N	Y
49	E1	FALSE	Multi-C	Unmethylated	UNKNOWN	FAM	NFQ-MGB	Undetermined						TRUE	0.04	TRUE	1	60		0	0	0	-100	N	Y	Y	Y
50	E2	FALSE	Multi-3s	Unmethylated	UNKNOWN	FAM	NFQ-MGB	40.8327	40.7912	0.0587763	0			TRUE	0.04	TRUE	1	60		0	0	0	-100	N	N	N	Y
51	E3	FALSE	Multi-10s	Unmethylated	UNKNOWN	FAM	NFQ-MGB	40.4946	39.8176	0.95756	0			TRUE	0.04	TRUE	1	60		0	0	0	-100	Y	N	N	Y
52	E4	FALSE	Multi-30s	Unmethylated	UNKNOWN	FAM	NFQ-MGB	39.4735	40.274	1.13202	0			TRUE	0.04	TRUE	1	60		0	0	0	-100	Y	N	N	Y
53	E5	FALSE	Blank	Unmethylated	NTC	FAM	NFQ-MGB							TRUE	0.04	TRUE	1	60		0	0	0	-100	N	N	N	Y
61	F1	FALSE	Multi-C	Unmethylated	UNKNOWN	FAM	NFQ-MGB	Undetermined						TRUE	0.04	TRUE	1	60		0	0	0	-100	N	Y	Y	Y
62	F2	FALSE	Multi-3s	Unmethylated	UNKNOWN	FAM	NFQ-MGB	40.7496	40.7912	0.0587763	0			TRUE	0.04	TRUE	1	60		0	0	0	-100	N	N	N	Y
63	F3	FALSE	Multi-10s	Unmethylated	UNKNOWN	FAM	NFQ-MGB	39.1405	39.8176	0.95756	0			TRUE	0.04	TRUE	1	60		0	0	0	-100	Y	N	N	Y
64	F4	FALSE	Multi-30s	Unmethylated	UNKNOWN	FAM	NFQ-MGB	41.0744	40.274	1.13202	0			TRUE	0.04	TRUE	1	60		0	0	0	-100	Y	N	N	Y
65	F5	FALSE	Blank	Unmethylated	NTC	FAM	NFQ-MGB	Undetermined						TRUE	0.04	TRUE	1	60		0	0	0	-100	N	N	N	Y
73	G1	FALSE	Multi-C	Methylated	UNKNOWN	FAM	NFQ-MGB	Undetermined						TRUE	0.04	TRUE	1	60		0	0	0	-100	N	Y	Y	Y
74	G2	FALSE	Multi-3s	Methylated	UNKNOWN	FAM	NFQ-MGB	34.9682	35.1728	0.289377	0			TRUE	0.04	TRUE	1	60		0	0	0	-100	N	N	N	Y
75	G3	FALSE	Multi-10s	Methylated	UNKNOWN	FAM	NFQ-MGB	34.0018	34.3232	0.454458	0			TRUE	0.04	TRUE	1	60		0	0	0	-100	N	N	N	Y
76	G4	FALSE	Multi-30s	Methylated	UNKNOWN	FAM	NFQ-MGB	33.5207	33.4332	0.123789	0			TRUE	0.04	TRUE	1	60		0	0	0	-100	N	N	N	Y
77	G5	FALSE	Blank	Methylated	NTC	FAM	NFQ-MGB	Undetermined						TRUE	0.04	TRUE	1	60		0	0	0	-100	N	N	N	Y
85	H1	FALSE	Multi-C	Methylated	UNKNOWN	FAM	NFQ-MGB	Undetermined						TRUE	0.04	TRUE	1	60		0	0	0	-100	N	Y	Y	Y
86	H2	FALSE	Multi-3s	Methylated	UNKNOWN	FAM	NFQ-MGB	35.3774	35.1728	0.289377	0			TRUE	0.04	TRUE	1	60		0	0	0	-100	N	N	N	Y
87	H3	FALSE	Multi-10s	Methylated	UNKNOWN	FAM	NFQ-MGB	34.6445	34.3232	0.454458	0			TRUE	0.04	TRUE	1	60		0	0	0	-100	N	N	N	Y
88	H4	FALSE	Multi-30s	Methylated	UNKNOWN	FAM	NFQ-MGB	33.3456	33.4332	0.123789	0			TRUE	0.04	TRUE	1	60		0	0	0	-100	N	N	N	Y
89	H5	FALSE	Blank	Methylated	NTC	FAM	NFQ-MGB	Undetermined						TRUE	0.04	TRUE	1	60		0	0	0	-100	N	N	N	Y
