# Supplementary material for: Shock-Scattering Micro-Histotripsy-Aided Fine Needle Aspiration for Enhanced Biomarker Profiling and Cytopathology
Source: Research Square preprint supplement (doi:10.21203/rs.3.rs-5939271/v1), 2025-04-23
Supplement: Supplementary file 4 [file Supplementary 2 - tumor.mm10_exonic_non-synonymous.xlsx]

## Sheet: Sheet1
Chr	Start	End	Ref	Alt	Func.refGene	Gene.refGene	GeneDetail.refGene	ExonicFunction.refGene	AAChange.refGene	otherInfo1	otherInfo2	otherInfo3	otherInfo4	otherInfo5	otherInfo6	otherInfo7	otherInfo8	otherInfo9	otherInfo10	otherInfo11
1	5117397	5117397	A	G	exonic	Atp6v1h	.	nonsynonymous SNV	Atp6v1h:NM_001310442:exon7:c.A533G:p.Q178R,Atp6v1h:NM_133826:exon8:c.A587G:p.Q196R	.	het	.	1	5117397	5117397	A	G	het	174.64	10
1	13152976	13152976	G	C	exonic	Ncoa2	.	nonsynonymous SNV	Ncoa2:NM_001302702:exon16:c.C3217G:p.Q1073E,Ncoa2:NM_008678:exon17:c.C3424G:p.Q1142E	.	het	.	1	13152976	13152976	G	C	het	398.64	20
1	13221336	13221336	T	C	exonic	Ncoa2	.	nonsynonymous SNV	Ncoa2:NM_001302702:exon4:c.T230G:p.V77G,Ncoa2:NM_008678:exon4:c.T230G:p.V77G	.	het	.	1	13221336	13221336	T	C	het	445.64	14
1	13221355	13221355	C	T	exonic	Ncoa2	.	nonsynonymous SNV	Ncoa2:NM_001302702:exon4:c.G211A:p.A71T,Ncoa2:NM_008678:exon4:c.G211A:p.A71T	.	het	.	1	13221355	13221355	C	T	het	319.64	11
1	17147014	17147014	T	G	exonic	Gdap1	.	nonsynonymous SNV	Gdap1:NM_010267:exon2:c.C196G:p.P66A	.	het	.	1	17147014	17147014	T	G	het	45.64	11
1	20961168	20961168	A	G	exonic	Efhc1	.	nonsynonymous SNV	Efhc1:NM_027974:exon4:c.C589G:p.Q197E	.	het	.	1	20961168	20961168	A	G	het	391.64	16
1	20961276	20961276	A	C	exonic	Efhc1	.	nonsynonymous SNV	Efhc1:NM_027974:exon4:c.A697C:p.K233Q	.	het	.	1	20961276	20961276	A	C	het	349.64	16
1	21005597	21005597	T	C	exonic	Tram2	.	nonsynonymous SNV	Tram2:NM_177409:exon7:c.T596G:p.L199R	.	het	.	1	21005597	21005597	T	C	het	537.64	25
1	21013427	21013427	G	A	exonic	Tram2	.	nonsynonymous SNV	Tram2:NM_177409:exon3:c.C269T:p.A90V	.	het	.	1	21013427	21013427	G	A	het	204.64	11
1	21384840	21384840	G	C	exonic	Khdc1b	.	nonsynonymous SNV	Khdc1b:NM_001113187:exon3:c.A322C:p.T108P	.	het	.	1	21384840	21384840	G	C	het	447.69	12
1	33764561	33764561	A	G	exonic	Zfp451	.	nonsynonymous SNV	Zfp451:NM_001359275:exon15:c.G3133C:p.E1045Q	.	het	.	1	33764561	33764561	A	G	het	72.64	17
1	33779113	33779113	A	C	exonic	Zfp451	.	nonsynonymous SNV	Zfp451:NM_001290699:exon7:c.C452G:p.P151R,Zfp451:NM_001359274:exon9:c.C935G:p.P312R,Zfp451:NM_001359275:exon9:c.C935G:p.P312R,Zfp451:NM_133817:exon9:c.C935G:p.P312R	.	het	.	1	33779113	33779113	A	C	het	215.64	10
1	33803490	33803490	T	C	exonic	Zfp451	.	nonsynonymous SNV	Zfp451:NM_001290700:exon4:c.C310G:p.Q104E	.	het	.	1	33803490	33803490	T	C	het	282.64	15
1	34167726	34167726	T	G	exonic	Dst	.	nonsynonymous SNV	Dst:NM_010081:exon13:c.A1996G:p.N666D,Dst:NM_133833:exon23:c.A2974G:p.N992D,Dst:NM_134448:exon23:c.A2974G:p.N992D,Dst:NM_001276764:exon26:c.A3508G:p.N1170D	.	het	.	1	34167726	34167726	T	G	het	184.64	11
1	34178776	34178776	T	C	exonic	Dst	.	nonsynonymous SNV	Dst:NM_010081:exon23:c.G4296C:p.Q1432H	.	het	.	1	34178776	34178776	T	C	het	86.64	11
1	34182741	34182741	A	G	exonic	Dst	.	nonsynonymous SNV	Dst:NM_010081:exon24:c.T7625G:p.M2542R	.	het	.	1	34182741	34182741	A	G	het	202.64	13
1	34183029	34183029	C	A	exonic	Dst	.	nonsynonymous SNV	Dst:NM_010081:exon24:c.C7913A:p.S2638Y	.	het	.	1	34183029	34183029	C	A	het	49.64	11
1	34190171	34190171	G	T	exonic	Dst	.	nonsynonymous SNV	Dst:NM_134448:exon36:c.G6844T:p.D2282Y,Dst:NM_001276764:exon39:c.G7378T:p.D2460Y	.	het	.	1	34190171	34190171	G	T	het	89.64	11
1	34190973	34190973	A	G	exonic	Dst	.	nonsynonymous SNV	Dst:NM_134448:exon36:c.T7646G:p.I2549R,Dst:NM_001276764:exon39:c.T8180G:p.I2727R	.	het	.	1	34190973	34190973	A	G	het	205.64	12
1	34191005	34191005	A	G	exonic	Dst	.	nonsynonymous SNV	Dst:NM_134448:exon36:c.A7678G:p.S2560G,Dst:NM_001276764:exon39:c.A8212G:p.S2738G	.	het	.	1	34191005	34191005	A	G	het	270.64	11
1	34191012	34191012	G	A	exonic	Dst	.	nonsynonymous SNV	Dst:NM_134448:exon36:c.G7685A:p.G2562D,Dst:NM_001276764:exon39:c.G8219A:p.G2740D	.	het	.	1	34191012	34191012	G	A	het	270.64	11
1	34218562	34218562	G	T	exonic	Dst	.	nonsynonymous SNV	Dst:NM_133833:exon48:c.G7414T:p.V2472L,Dst:NM_134448:exon53:c.G13456T:p.V4486L,Dst:NM_001276764:exon56:c.G13990T:p.V4664L	.	het	.	1	34218562	34218562	G	T	het	195.64	14
1	34275326	34275326	G	C	exonic	Dst	.	nonsynonymous SNV	Dst:NM_133833:exon74:c.T13307C:p.L4436S,Dst:NM_134448:exon79:c.T19349C:p.L6450S,Dst:NM_001276764:exon83:c.T20210C:p.L6737S	.	het	.	1	34275326	34275326	G	C	het	304.64	22
1	34721933	34721933	C	T	exonic	Arhgef4	.	nonsynonymous SNV	Arhgef4:NM_001368773:exon2:c.A269T:p.E90V	.	het	.	1	34721933	34721933	C	T	het	277.64	18
1	34723895	34723895	C	A	exonic	Arhgef4	.	nonsynonymous SNV	Arhgef4:NM_001368773:exon2:c.C2231A:p.A744D	.	het	.	1	34723895	34723895	C	A	het	183.64	10
1	36144238	36144238	T	C	exonic	Uggt1	.	nonsynonymous SNV	Uggt1:NM_198899:exon41:c.T4644G:p.H1548Q	.	het	.	1	36144238	36144238	T	C	het	57.64	22
1	36157400	36157400	A	G	exonic	Uggt1	.	nonsynonymous SNV	Uggt1:NM_198899:exon34:c.G3815C:p.R1272P	.	het	.	1	36157400	36157400	A	G	het	125.64	10
1	36158139	36158139	G	A	exonic	Uggt1	.	nonsynonymous SNV	Uggt1:NM_198899:exon33:c.A3682T:p.N1228Y	.	het	.	1	36158139	36158139	G	A	het	49.64	14
1	36158183	36158183	G	C	exonic	Uggt1	.	nonsynonymous SNV	Uggt1:NM_198899:exon33:c.C3638G:p.A1213G	.	het	.	1	36158183	36158183	G	C	het	175.64	14
1	36158184	36158184	G	A	exonic	Uggt1	.	nonsynonymous SNV	Uggt1:NM_198899:exon33:c.G3637T:p.A1213S	.	het	.	1	36158184	36158184	G	A	het	175.64	14
1	36161692	36161692	T	C	exonic	Uggt1	.	nonsynonymous SNV	Uggt1:NM_198899:exon31:c.A3523G:p.I1175V	.	het	.	1	36161692	36161692	T	C	het	245.64	17
1	36161707	36161707	C	T	exonic	Uggt1	.	nonsynonymous SNV	Uggt1:NM_198899:exon31:c.G3508A:p.G1170R	.	het	.	1	36161707	36161707	C	T	het	343.64	18
1	36162358	36162358	C	T	exonic	Uggt1	.	nonsynonymous SNV	Uggt1:NM_198899:exon30:c.C3300A:p.D1100E	.	het	.	1	36162358	36162358	C	T	het	97.64	10
1	36163255	36163255	C	A	exonic	Uggt1	.	nonsynonymous SNV	Uggt1:NM_198899:exon29:c.C3260T:p.T1087I	.	het	.	1	36163255	36163255	C	A	het	79.64	16
1	36163262	36163262	T	A	exonic	Uggt1	.	nonsynonymous SNV	Uggt1:NM_198899:exon29:c.G3253T:p.V1085F	.	het	.	1	36163262	36163262	T	A	het	85.64	14
1	36184362	36184362	T	C	exonic	Uggt1	.	nonsynonymous SNV	Uggt1:NM_198899:exon17:c.T1845G:p.N615K	.	het	.	1	36184362	36184362	T	C	het	41.64	11
1	36418228	36418228	C	T	exonic	Fer1l5	.	nonsynonymous SNV	Fer1l5:NM_001277076:exon45:c.C5057T:p.P1686L	.	het	.	1	36418228	36418228	C	T	het	34.64	13
1	36445161	36445161	G	A	exonic	Lman2l	.	nonsynonymous SNV	Lman2l:NM_001013374:exon1:c.C73T:p.L25F,Lman2l:NM_001310517:exon1:c.C73T:p.L25F	.	het	.	1	36445161	36445161	G	A	het	119.64	15
1	36512920	36512920	C	T	exonic	Cnnm3	.	nonsynonymous SNV	Cnnm3:NM_001039551:exon1:c.C1010T:p.T337I,Cnnm3:NM_001331209:exon1:c.C1010T:p.T337I,Cnnm3:NM_053186:exon1:c.C1010T:p.T337I	.	het	.	1	36512920	36512920	C	T	het	203.64	17
1	36804558	36804558	A	G	exonic	Tmem131	.	nonsynonymous SNV	Tmem131:NM_018872:exon32:c.G4221C:p.E1407D	.	het	.	1	36804558	36804558	A	G	het	246.64	15
1	36810324	36810324	A	G	exonic	Tmem131	.	nonsynonymous SNV	Tmem131:NM_018872:exon29:c.A3337C:p.N1113H	.	het	.	1	36810324	36810324	A	G	het	168.64	12
1	36810456	36810456	G	A	exonic	Tmem131	.	nonsynonymous SNV	Tmem131:NM_018872:exon29:c.G3205T:p.D1069Y	.	het	.	1	36810456	36810456	G	A	het	76.64	17
1	36810465	36810465	A	G	exonic	Tmem131	.	nonsynonymous SNV	Tmem131:NM_018872:exon29:c.T3196C:p.F1066L	.	het	.	1	36810465	36810465	A	G	het	70.64	19
1	36812186	36812186	A	G	exonic	Tmem131	.	nonsynonymous SNV	Tmem131:NM_018872:exon27:c.A2982C:p.E994D	.	het	.	1	36812186	36812186	A	G	het	151.64	15
1	36812278	36812278	G	A	exonic	Tmem131	.	nonsynonymous SNV	Tmem131:NM_018872:exon27:c.G2890T:p.V964L	.	het	.	1	36812278	36812278	G	A	het	127.64	10
1	36812581	36812581	C	T	exonic	Tmem131	.	nonsynonymous SNV	Tmem131:NM_018872:exon26:c.C2840A:p.T947N	.	het	.	1	36812581	36812581	C	T	het	43.64	10
1	36812621	36812621	C	G	exonic	Tmem131	.	nonsynonymous SNV	Tmem131:NM_018872:exon26:c.A2800C:p.K934Q	.	het	.	1	36812621	36812621	C	G	het	174.64	10
1	36812691	36812691	A	C	exonic	Tmem131	.	nonsynonymous SNV	Tmem131:NM_018872:exon26:c.T2730G:p.S910R	.	het	.	1	36812691	36812691	A	C	het	271.64	12
1	36812698	36812698	A	T	exonic	Tmem131	.	nonsynonymous SNV	Tmem131:NM_018872:exon26:c.T2723A:p.L908Q	.	het	.	1	36812698	36812698	A	T	het	271.64	12
1	36812702	36812702	G	A	exonic	Tmem131	.	nonsynonymous SNV	Tmem131:NM_018872:exon26:c.C2719T:p.P907S	.	het	.	1	36812702	36812702	G	A	het	271.64	12
1	36823099	36823099	T	C	exonic	Tmem131	.	nonsynonymous SNV	Tmem131:NM_018872:exon19:c.C2017G:p.P673A	.	hom	.	1	36823099	36823099	T	C	hom	440.74	16
1	36825335	36825335	A	G	exonic	Tmem131	.	nonsynonymous SNV	Tmem131:NM_018872:exon17:c.A1734C:p.K578N	.	het	.	1	36825335	36825335	A	G	het	625.64	26
1	36827044	36827044	T	C	exonic	Tmem131	.	nonsynonymous SNV	Tmem131:NM_018872:exon15:c.T1578G:p.H526Q	.	het	.	1	36827044	36827044	T	C	het	445.64	14
1	37085247	37085247	T	C	exonic	Vwa3b	.	nonsynonymous SNV	Vwa3b:NM_001370828:exon8:c.G925C:p.E309Q,Vwa3b:NM_001370829:exon8:c.G925C:p.E309Q	.	het	.	1	37085247	37085247	T	C	het	236.64	10
1	37100662	37100662	T	C	exonic	Vwa3b	.	nonsynonymous SNV	Vwa3b:NM_001370828:exon9:c.A1063C:p.N355H,Vwa3b:NM_001370829:exon9:c.A1063C:p.N355H	.	het	.	1	37100662	37100662	T	C	het	160.64	12
1	37403538	37403538	A	G	exonic	Inpp4a	.	nonsynonymous SNV	Inpp4a:NM_001290798:exon15:c.C1949G:p.S650C,Inpp4a:NM_001290799:exon15:c.C1946G:p.S649C,Inpp4a:NM_172971:exon16:c.C1982G:p.S661C	.	het	.	1	37403538	37403538	A	G	het	47.64	12
1	37431313	37431313	A	G	exonic	Unc50	.	nonsynonymous SNV	Unc50:NM_001356528:exon2:c.C17G:p.S6C,Unc50:NM_026123:exon2:c.C17G:p.S6C	.	het	.	1	37431313	37431313	A	G	het	79.64	16
1	37449153	37449153	C	T	exonic	Mgat4a	.	nonsynonymous SNV	Mgat4a:NM_001290801:exon13:c.T1384A:p.L462M,Mgat4a:NM_173870:exon14:c.T1411A:p.L471M	.	het	.	1	37449153	37449153	C	T	het	258.64	23
1	37452548	37452548	T	C	exonic	Mgat4a	.	nonsynonymous SNV	Mgat4a:NM_001290801:exon10:c.C1075G:p.L359V,Mgat4a:NM_173870:exon11:c.C1102G:p.L368V	.	het	.	1	37452548	37452548	T	C	het	77.64	13
1	38947579	38947579	T	C	exonic	Nms	.	nonsynonymous SNV	Nms:NM_001311788:exon7:c.G377C:p.G126A,Nms:NM_001011684:exon8:c.G401C:p.G134A	.	het	.	1	38947579	38947579	T	C	het	124.64	12
1	40365318	40365318	G	C	exonic	Il1rl2	.	nonsynonymous SNV	Il1rl2:NM_001356478:exon11:c.A1598C:p.K533T,Il1rl2:NM_133193:exon11:c.A1598C:p.K533T	.	het	.	1	40365318	40365318	G	C	het	84.64	13
1	40610376	40610376	C	T	exonic	Slc9a4	.	nonsynonymous SNV	Slc9a4:NM_177084:exon7:c.A1548T:p.Q516H	.	het	.	1	40610376	40610376	C	T	het	44.64	13
1	44073830	44073830	G	A	exonic	Gm8251	.	nonsynonymous SNV	Gm8251:NM_001376984:exon4:c.C1895T:p.P632L	.	het	.	1	44073830	44073830	G	A	het	176.64	23
1	44074156	44074156	G	A	exonic	Gm8251	.	nonsynonymous SNV	Gm8251:NM_001376984:exon4:c.A1569T:p.K523N	.	het	.	1	44074156	44074156	G	A	het	31.64	14
1	44141812	44141812	A	G	exonic	Bivm	.	nonsynonymous SNV	Bivm:NM_144558:exon9:c.A1153G:p.N385D,Bivm:NM_001357046:exon10:c.A1153G:p.N385D,Bivm:NM_001357047:exon10:c.A1153G:p.N385D,Bivm:NM_001357048:exon10:c.A1153G:p.N385D	.	het	.	1	44141812	44141812	A	G	het	346.64	21
1	45380254	45380254	G	A	exonic	Col5a2	.	nonsynonymous SNV	Col5a2:NM_007737:exon51:c.G3665T:p.G1222V	.	het	.	1	45380254	45380254	G	A	het	93.64	18
1	45384975	45384975	A	G	exonic	Col5a2	.	nonsynonymous SNV	Col5a2:NM_007737:exon46:c.A3290C:p.Q1097P	.	het	.	1	45384975	45384975	A	G	het	64.64	21
1	45384993	45384993	T	C	exonic	Col5a2	.	nonsynonymous SNV	Col5a2:NM_007737:exon46:c.C3272G:p.A1091G	.	het	.	1	45384993	45384993	T	C	het	83.64	23
1	46352850	46352850	A	G	exonic	Dnah7b	.	nonsynonymous SNV	Dnah7b:NM_001368717:exon61:c.T11238G:p.D3746E	.	het	.	1	46352850	46352850	A	G	het	45.64	11
1	46352941	46352941	C	A	exonic	Dnah7b	.	nonsynonymous SNV	Dnah7b:NM_001368717:exon61:c.T11329A:p.Y3777N	.	het	.	1	46352941	46352941	C	A	het	43.64	10
1	46595104	46595104	C	T	exonic	Dnah7c	.	nonsynonymous SNV	Dnah7c:NM_001310335:exon20:c.A3242T:p.E1081V	.	het	.	1	46595104	46595104	C	T	het	84.64	10
1	53501565	53501565	G	C	exonic	Dnah7a	.	nonsynonymous SNV	Dnah7a:NM_001252070:exon43:c.A7649G:p.N2550S	.	het	.	1	53501565	53501565	G	C	het	49.64	11
1	59168167	59168167	A	C	exonic	Als2	.	nonsynonymous SNV	Als2:NM_001159948:exon31:c.T4654G:p.C1552G,Als2:NM_028717:exon31:c.T4654G:p.C1552G	.	het	.	1	59168167	59168167	A	C	het	84.64	10
1	59170440	59170440	G	T	exonic	Als2	.	nonsynonymous SNV	Als2:NM_001159948:exon28:c.C4382A:p.P1461Q,Als2:NM_028717:exon28:c.C4382A:p.P1461Q	.	het	.	1	59170440	59170440	G	T	het	94.64	11
1	59178542	59178542	C	T	exonic	Als2	.	nonsynonymous SNV	Als2:NM_001159948:exon25:c.C3976A:p.H1326N,Als2:NM_028717:exon25:c.C3976A:p.H1326N	.	het	.	1	59178542	59178542	C	T	het	95.64	23
1	60087139	60087139	G	A	exonic	Wdr12	.	nonsynonymous SNV	Wdr12:NM_021312:exon6:c.G516T:p.W172C,Wdr12:NM_001199060:exon7:c.G516T:p.W172C,Wdr12:NM_001199061:exon7:c.G516T:p.W172C	.	het	.	1	60087139	60087139	G	A	het	52.64	10
1	63302996	63302996	T	C	exonic	Zdbf2	.	nonsynonymous SNV	Zdbf2:NM_001267872:exon6:c.T533C:p.V178A,Zdbf2:NM_001285937:exon6:c.T548C:p.V183A,Zdbf2:NM_001285936:exon7:c.T548C:p.V183A,Zdbf2:NM_028673:exon7:c.T533C:p.V178A	.	het	.	1	63302996	63302996	T	C	het	115.64	12
1	63305560	63305560	G	A	exonic	Zdbf2	.	nonsynonymous SNV	Zdbf2:NM_001267872:exon6:c.G3097A:p.A1033T,Zdbf2:NM_001285937:exon6:c.G3112A:p.A1038T,Zdbf2:NM_001285936:exon7:c.G3112A:p.A1038T,Zdbf2:NM_028673:exon7:c.G3097A:p.A1033T	.	het	.	1	63305560	63305560	G	A	het	40.64	20
1	63739263	63739263	G	A	exonic	Fastkd2	.	nonsynonymous SNV	Fastkd2:NM_172422:exon7:c.C1294A:p.Q432K	.	het	.	1	63739263	63739263	G	A	het	81.64	22
1	69887511	69887511	A	G	exonic	Spag16	.	nonsynonymous SNV	Spag16:NM_001271533:exon8:c.C764G:p.T255R,Spag16:NM_029160:exon8:c.C764G:p.T255R	.	het	.	1	69887511	69887511	A	G	het	351.64	24
1	69887542	69887542	C	T	exonic	Spag16	.	nonsynonymous SNV	Spag16:NM_001271533:exon8:c.G795T:p.Q265H,Spag16:NM_029160:exon8:c.G795T:p.Q265H	.	het	.	1	69887542	69887542	C	T	het	637.64	29
1	69887546	69887546	A	T	exonic	Spag16	.	nonsynonymous SNV	Spag16:NM_001271533:exon8:c.C799T:p.P267S,Spag16:NM_029160:exon8:c.C799T:p.P267S	.	het	.	1	69887546	69887546	A	T	het	637.64	29
1	71595697	71595697	G	A	exonic	Fn1	.	nonsynonymous SNV	Fn1:NM_001276410:exon39:c.G6274T:p.V2092F,Fn1:NM_001276411:exon39:c.G6199T:p.V2067F,Fn1:NM_001276413:exon39:c.G5914T:p.V1972F,Fn1:NM_001276408:exon40:c.G6544T:p.V2182F,Fn1:NM_001276409:exon40:c.G6469T:p.V2157F,Fn1:NM_001276412:exon40:c.G6184T:p.V2062F,Fn1:NM_010233:exon41:c.G6817T:p.V2273F	.	het	.	1	71595697	71595697	G	A	het	139.64	11
1	71595700	71595700	A	G	exonic	Fn1	.	nonsynonymous SNV	Fn1:NM_001276410:exon39:c.A6271C:p.K2091Q,Fn1:NM_001276411:exon39:c.A6196C:p.K2066Q,Fn1:NM_001276413:exon39:c.A5911C:p.K1971Q,Fn1:NM_001276408:exon40:c.A6541C:p.K2181Q,Fn1:NM_001276409:exon40:c.A6466C:p.K2156Q,Fn1:NM_001276412:exon40:c.A6181C:p.K2061Q,Fn1:NM_010233:exon41:c.A6814C:p.K2272Q	.	het	.	1	71595700	71595700	A	G	het	142.64	10
1	72330034	72330034	C	G	exonic	Xrcc5	.	nonsynonymous SNV	Xrcc5:NM_001357519:exon9:c.C989G:p.S330C,Xrcc5:NM_001357520:exon9:c.C989G:p.S330C,Xrcc5:NM_009533:exon9:c.C1046G:p.S349C	.	het	.	1	72330034	72330034	C	G	het	91.64	12
1	72595804	72595804	T	C	exonic	Smarcal1	.	nonsynonymous SNV	Smarcal1:NM_018817:exon6:c.A1041C:p.E347D	.	het	.	1	72595804	72595804	T	C	het	58.64	19
1	72595898	72595898	C	T	exonic	Smarcal1	.	nonsynonymous SNV	Smarcal1:NM_018817:exon6:c.G1135T:p.V379L	.	het	.	1	72595898	72595898	C	T	het	60.64	18
1	72632913	72632913	A	G	exonic	Smarcal1	.	nonsynonymous SNV	Smarcal1:NM_018817:exon17:c.T2592G:p.F864L	.	het	.	1	72632913	72632913	A	G	het	142.64	18
1	72632965	72632965	C	T	exonic	Smarcal1	.	nonsynonymous SNV	Smarcal1:NM_018817:exon17:c.G2644T:p.D882Y	.	het	.	1	72632965	72632965	C	T	het	136.64	17
1	75316049	75316049	A	G	exonic	Dnpep	.	nonsynonymous SNV	Dnpep:NM_001110831:exon5:c.A325C:p.S109R,Dnpep:NM_016878:exon5:c.A319C:p.S107R	.	het	.	1	75316049	75316049	A	G	het	64.64	21
1	75316765	75316765	A	G	exonic	Dnpep	.	nonsynonymous SNV	Dnpep:NM_001110831:exon2:c.G45C:p.Q15H,Dnpep:NM_016878:exon2:c.G39C:p.Q13H	.	het	.	1	75316765	75316765	A	G	het	209.64	15
1	75387893	75387893	C	T	exonic	Speg	.	nonsynonymous SNV	Speg:NM_007463:exon4:c.C917T:p.P306L,Speg:NM_001085371:exon5:c.C599T:p.P200L	.	het	.	1	75387893	75387893	C	T	het	220.64	28
1	75388133	75388133	A	C	exonic	Speg	.	nonsynonymous SNV	Speg:NM_007463:exon4:c.G1157C:p.G386A,Speg:NM_001085371:exon5:c.G839C:p.G280A	.	het	.	1	75388133	75388133	A	C	het	137.64	21
1	75388751	75388751	T	G	exonic	Speg	.	nonsynonymous SNV	Speg:NM_007463:exon4:c.A1775G:p.Q592R,Speg:NM_001085371:exon5:c.A1457G:p.Q486R	.	het	.	1	75388751	75388751	T	G	het	64.64	21
1	75389043	75389043	A	G	exonic	Speg	.	nonsynonymous SNV	Speg:NM_007463:exon4:c.C2067G:p.D689E,Speg:NM_001085371:exon5:c.C1749G:p.D583E	.	het	.	1	75389043	75389043	A	G	het	25.64	13
1	75391095	75391095	A	G	exonic	Speg	.	nonsynonymous SNV	Speg:NM_001085370:exon3:c.A40G:p.I14V,Speg:NM_007463:exon5:c.A2245G:p.I749V,Speg:NM_001085371:exon6:c.A1927G:p.I643V	.	het	.	1	75391095	75391095	A	G	het	203.64	13
1	75407007	75407007	G	C	exonic	Speg	.	nonsynonymous SNV	Speg:NM_001085370:exon11:c.A1433C:p.E478A,Speg:NM_007463:exon13:c.A3638C:p.E1213A	.	het	.	1	75407007	75407007	G	C	het	95.04	12
1	75415168	75415168	C	T	exonic	Speg	.	nonsynonymous SNV	Speg:NM_001085370:exon18:c.G2539T:p.A847S,Speg:NM_007463:exon20:c.G4744T:p.A1582S	.	het	.	1	75415168	75415168	C	T	het	243.64	20
1	75417736	75417736	T	G	exonic	Speg	.	nonsynonymous SNV	Speg:NM_001085370:exon22:c.T2969G:p.V990G,Speg:NM_007463:exon24:c.T5174G:p.V1725G	.	het	.	1	75417736	75417736	T	G	het	197.64	21
1	75421809	75421809	T	C	exonic	Speg	.	nonsynonymous SNV	Speg:NM_001085370:exon28:c.A3694C:p.T1232P,Speg:NM_007463:exon30:c.A5899C:p.T1967P	.	het	.	1	75421809	75421809	T	C	het	121.64	25
1	75427775	75427775	C	A	exonic	Speg	.	nonsynonymous SNV	Speg:NM_001085370:exon33:c.C6118A:p.P2040T,Speg:NM_007463:exon35:c.C8323A:p.P2775T	.	het	.	1	75427775	75427775	C	A	het	185.64	23
1	75428107	75428107	G	T	exonic	Speg	.	nonsynonymous SNV	Speg:NM_001085370:exon34:c.C6337T:p.P2113S,Speg:NM_007463:exon36:c.C8542T:p.P2848S	.	het	.	1	75428107	75428107	G	T	het	167.64	26
1	75429546	75429546	T	C	exonic	Speg	.	nonsynonymous SNV	Speg:NM_001085370:exon36:c.T7091C:p.F2364S,Speg:NM_007463:exon38:c.T9296C:p.F3099S	.	het	.	1	75429546	75429546	T	C	het	28.64	18
1	75477747	75477747	C	A	exonic	Chpf	.	nonsynonymous SNV	Chpf:NM_001001566:exon2:c.C386T:p.T129M	.	het	.	1	75477747	75477747	C	A	het	72.64	14
1	75478856	75478856	T	C	exonic	Chpf	.	nonsynonymous SNV	Chpf:NM_001001566:exon1:c.T250G:p.W84G	.	het	.	1	75478856	75478856	T	C	het	217.64	26
1	75480312	75480312	T	C	exonic	Tmem198	.	nonsynonymous SNV	Tmem198:NM_177056:exon2:c.A81C:p.E27D	.	het	.	1	75480312	75480312	T	C	het	190.64	32
1	75503570	75503570	G	A	exonic	Obsl1	.	nonsynonymous SNV	Obsl1:NM_001310679:exon3:c.A1331T:p.E444V,Obsl1:NM_178884:exon3:c.A1331T:p.E444V	.	het	.	1	75503570	75503570	G	A	het	149.64	13
1	75503909	75503909	A	G	exonic	Obsl1	.	nonsynonymous SNV	Obsl1:NM_001310679:exon2:c.T1070C:p.I357T,Obsl1:NM_178884:exon2:c.T1070C:p.I357T	.	het	.	1	75503909	75503909	A	G	het	238.64	22
1	75505273	75505273	G	A	exonic	Obsl1	.	nonsynonymous SNV	Obsl1:NM_001310679:exon1:c.G952T:p.V318L,Obsl1:NM_178884:exon1:c.G952T:p.V318L	.	het	.	1	75505273	75505273	G	A	het	237.64	24
1	75505348	75505348	T	C	exonic	Obsl1	.	nonsynonymous SNV	Obsl1:NM_001310679:exon1:c.C877G:p.L293V,Obsl1:NM_178884:exon1:c.C877G:p.L293V	.	het	.	1	75505348	75505348	T	C	het	249.64	35
1	75505515	75505515	T	C	exonic	Obsl1	.	nonsynonymous SNV	Obsl1:NM_001310679:exon1:c.C710G:p.P237R,Obsl1:NM_178884:exon1:c.C710G:p.P237R	.	het	.	1	75505515	75505515	T	C	het	82.64	25
1	75509888	75509888	T	C	exonic	Inha	.	nonsynonymous SNV	Inha:NM_001329843:exon2:c.G337C:p.G113R,Inha:NM_010564:exon2:c.G826C:p.G276R	.	het	.	1	75509888	75509888	T	C	het	283.64	30
1	75509924	75509924	T	C	exonic	Inha	.	nonsynonymous SNV	Inha:NM_001329843:exon2:c.A373C:p.I125L,Inha:NM_010564:exon2:c.A862C:p.I288L	.	het	.	1	75509924	75509924	T	C	het	195.64	25
1	75509990	75509990	G	A	exonic	Inha	.	nonsynonymous SNV	Inha:NM_001329843:exon2:c.G439A:p.V147M,Inha:NM_010564:exon2:c.G928A:p.V310M	.	het	.	1	75509990	75509990	G	A	het	193.64	23
1	75510011	75510011	G	T	exonic	Inha	.	nonsynonymous SNV	Inha:NM_001329843:exon2:c.C460T:p.P154S,Inha:NM_010564:exon2:c.C949T:p.P317S	.	het	.	1	75510011	75510011	G	T	het	119.64	21
1	75510014	75510014	G	A	exonic	Inha	.	nonsynonymous SNV	Inha:NM_001329843:exon2:c.C463A:p.L155M,Inha:NM_010564:exon2:c.C952A:p.L318M	.	het	.	1	75510014	75510014	G	A	het	119.64	21
1	75510063	75510063	G	A	exonic	Inha	.	nonsynonymous SNV	Inha:NM_001329843:exon2:c.G512A:p.S171N,Inha:NM_010564:exon2:c.G1001A:p.S334N	.	het	.	1	75510063	75510063	G	A	het	72.64	14
1	75529974	75529974	T	C	exonic	Stk11ip	.	nonsynonymous SNV	Stk11ip:NM_027886:exon16:c.G1820C:p.R607P	.	het	.	1	75529974	75529974	T	C	het	245.64	37
1	75534208	75534208	T	C	exonic	Stk11ip	.	nonsynonymous SNV	Stk11ip:NM_027886:exon22:c.G2705C:p.C902S	.	het	.	1	75534208	75534208	T	C	het	76.64	17
1	75534243	75534243	G	A	exonic	Stk11ip	.	nonsynonymous SNV	Stk11ip:NM_027886:exon22:c.C2740A:p.H914N	.	het	.	1	75534243	75534243	G	A	het	43.64	13
1	75534253	75534253	A	C	exonic	Stk11ip	.	nonsynonymous SNV	Stk11ip:NM_027886:exon22:c.G2750C:p.W917S	.	het	.	1	75534253	75534253	A	C	het	85.64	14
1	75534415	75534415	C	A	exonic	Stk11ip	.	nonsynonymous SNV	Stk11ip:NM_027886:exon23:c.G2762A:p.G921E	.	het	.	1	75534415	75534415	C	A	het	94.64	22
1	75534456	75534456	C	T	exonic	Stk11ip	.	nonsynonymous SNV	Stk11ip:NM_027886:exon23:c.C2803T:p.R935W	.	het	.	1	75534456	75534456	C	T	het	117.64	18
1	75536162	75536162	C	T	exonic	Stk11ip	.	nonsynonymous SNV	Stk11ip:NM_027886:exon25:c.G3146T:p.R1049L	.	het	.	1	75536162	75536162	C	T	het	175.64	15
1	82489838	82489838	T	A	exonic	Col4a4	.	nonsynonymous SNV	Col4a4:NM_007735:exon30:c.A2554T:p.M852L	.	het	.	1	82489838	82489838	T	A	het	35.64	10
1	82492642	82492642	T	C	exonic	Col4a4	.	nonsynonymous SNV	Col4a4:NM_007735:exon28:c.C2165G:p.P722R	.	het	.	1	82492642	82492642	T	C	het	40.64	14
1	82492644	82492644	G	T	exonic	Col4a4	.	nonsynonymous SNV	Col4a4:NM_007735:exon28:c.T2163A:p.D721E	.	het	.	1	82492644	82492644	G	T	het	40.64	14
1	85091111	85091111	C	A	exonic	A530032D15Rik	.	nonsynonymous SNV	A530032D15Rik:NM_213615:exon5:c.A509T:p.K170M	.	het	.	1	85091111	85091111	C	A	het	37.64	12
1	85666926	85666926	T	C	exonic	Sp100	.	nonsynonymous SNV	Sp100:NM_001313712:exon6:c.A506C:p.N169T,Sp100:NM_001313713:exon6:c.A506C:p.N169T,Sp100:NM_001313714:exon6:c.A506C:p.N169T,Sp100:NM_001372231:exon6:c.A506C:p.N169T,Sp100:NM_001372232:exon6:c.A506C:p.N169T,Sp100:NM_013673:exon6:c.A506C:p.N169T	.	het	.	1	85666926	85666926	T	C	het	170.64	10
1	85894716	85894716	A	T	exonic	Itm2c	.	nonsynonymous SNV	Itm2c:NM_022417:exon1:c.C53T:p.A18V	.	het	.	1	85894716	85894716	A	T	het	355.64	11
1	86092065	86092065	A	G	exonic	Psmd1	.	nonsynonymous SNV	Psmd1:NM_027357:exon15:c.C1785G:p.N595K	.	het	.	1	86092065	86092065	A	G	het	430.64	23
1	86099668	86099668	G	A	exonic	Htr2b	.	nonsynonymous SNV	Htr2b:NM_008311:exon4:c.C1115T:p.S372L	.	het	.	1	86099668	86099668	G	A	het	401.64	16
1	86191052	86191052	G	A	exonic	Armc9	.	nonsynonymous SNV	Armc9:NM_001310702:exon12:c.C1072A:p.L358M,Armc9:NM_027456:exon12:c.C1072A:p.L358M,Armc9:NM_030184:exon12:c.C1072A:p.L358M	.	het	.	1	86191052	86191052	G	A	het	479.64	24
1	86202539	86202539	G	A	exonic	Armc9	.	nonsynonymous SNV	Armc9:NM_001310702:exon17:c.C1604A:p.S535Y,Armc9:NM_027456:exon17:c.C1604A:p.S535Y,Armc9:NM_030184:exon17:c.C1604A:p.S535Y	.	het	.	1	86202539	86202539	G	A	het	545.64	21
1	87088791	87088791	G	A	exonic	Alppl2	.	nonsynonymous SNV	Alppl2:NM_007433:exon5:c.A560T:p.Y187F	.	het	.	1	87088791	87088791	G	A	het	383.64	22
1	87098796	87098796	A	G	exonic	Alpi	.	nonsynonymous SNV	Alpi:NM_001081082:exon11:c.A1472C:p.Y491S	.	het	.	1	87098796	87098796	A	G	het	121.64	10
1	87100731	87100731	T	G	exonic	Alpi	.	nonsynonymous SNV	Alpi:NM_001081082:exon4:c.G436C:p.G146R	.	het	.	1	87100731	87100731	T	G	het	356.64	16
1	87101270	87101270	C	T	exonic	Alpi	.	nonsynonymous SNV	Alpi:NM_001081082:exon2:c.G181A:p.G61R	.	het	.	1	87101270	87101270	C	T	het	636.64	25
1	87125258	87125258	A	G	exonic	Akp3	.	nonsynonymous SNV	Akp3:NM_007432:exon2:c.C168G:p.I56M	.	het	.	1	87125258	87125258	A	G	het	426.64	17
1	87127053	87127053	G	A	exonic	Akp3	.	nonsynonymous SNV	Akp3:NM_007432:exon9:c.T1109A:p.L370Q	.	het	.	1	87127053	87127053	G	A	het	517.64	18
1	87127107	87127107	T	C	exonic	Akp3	.	nonsynonymous SNV	Akp3:NM_007432:exon9:c.T1163C:p.L388P	.	het	.	1	87127107	87127107	T	C	het	391.64	13
1	87186347	87186347	C	T	exonic	Prss56	.	nonsynonymous SNV	Prss56:NM_027084:exon8:c.G938T:p.W313L	.	het	.	1	87186347	87186347	C	T	het	728.64	31
1	87410779	87410779	0	T	exonic	Gigyf2	.	nonsynonymous SNV	Gigyf2:NM_001110212:exon13:c.C1385T:p.T462I,Gigyf2:NM_146112:exon13:c.C1403T:p.T468I	.	het	.	1	87410779	87410779	-	T	het	426.60	17
1	87475094	87475094	A	G	exonic	Snorc	.	nonsynonymous SNV	Snorc:NM_001356490:exon2:c.C142G:p.L48V,Snorc:NM_028473:exon2:c.C145G:p.L49V	.	het	.	1	87475094	87475094	A	G	het	302.64	19
1	87475121	87475121	A	G	exonic	Snorc	.	nonsynonymous SNV	Snorc:NM_001356490:exon2:c.T169G:p.F57V,Snorc:NM_028473:exon2:c.T172G:p.F58V	.	het	.	1	87475121	87475121	A	G	het	384.64	19
1	87475409	87475409	T	C	exonic	Snorc	.	nonsynonymous SNV	Snorc:NM_001356490:exon3:c.G334C:p.V112L,Snorc:NM_028473:exon3:c.G337C:p.V113L	.	het	.	1	87475409	87475409	T	C	het	318.64	14
1	87718265	87718265	G	A	exonic	Inpp5d	.	nonsynonymous SNV	Inpp5d:NM_001110192:exon26:c.T3551A:p.L1184H,Inpp5d:NM_010566:exon26:c.T3554A:p.L1185H,Inpp5d:NM_001110193:exon27:c.T3371A:p.L1124H	.	hom	.	1	87718265	87718265	G	A	hom	706.06	16
1	88139109	88139109	T	G	exonic	Ugt1a6a	.	nonsynonymous SNV	Ugt1a6a:NM_145079:exon2:c.C636G:p.F212L	.	het	.	1	88139109	88139109	T	G	het	181.64	12
1	88139119	88139119	A	G	exonic	Ugt1a6a	.	nonsynonymous SNV	Ugt1a6a:NM_145079:exon2:c.A646G:p.I216V	.	het	.	1	88139119	88139119	A	G	het	223.64	13
1	88166164	88166164	A	G	exonic	Ugt1a5	.	nonsynonymous SNV	Ugt1a5:NM_201643:exon1:c.T113G:p.L38R	.	het	.	1	88166164	88166164	A	G	het	1399.64	61
1	88166182	88166182	G	A	exonic	Ugt1a5	.	nonsynonymous SNV	Ugt1a5:NM_201643:exon1:c.T131A:p.V44E	.	het	.	1	88166182	88166182	G	A	het	1404.64	62
1	88166233	88166233	T	C	exonic	Ugt1a5	.	nonsynonymous SNV	Ugt1a5:NM_201643:exon1:c.T182C:p.V61A	.	het	.	1	88166233	88166233	T	C	het	1501.64	69
1	88166254	88166254	C	G	exonic	Ugt1a5	.	nonsynonymous SNV	Ugt1a5:NM_201643:exon1:c.A203G:p.E68G	.	het	.	1	88166254	88166254	C	G	het	2217.64	83
1	88166538	88166538	G	A	exonic	Ugt1a5	.	nonsynonymous SNV	Ugt1a5:NM_201643:exon1:c.C487A:p.P163T	.	het	.	1	88166538	88166538	G	A	het	686.64	108
1	88166572	88166572	C	T	exonic	Ugt1a5	.	nonsynonymous SNV	Ugt1a5:NM_201643:exon1:c.G521T:p.G174V	.	het	.	1	88166572	88166572	C	T	het	793.64	105
1	88166728	88166728	A	C	exonic	Ugt1a5	.	nonsynonymous SNV	Ugt1a5:NM_201643:exon1:c.A677C:p.Y226S	.	het	.	1	88166728	88166728	A	C	het	1002.64	107
1	88166856	88166856	T	C	exonic	Ugt1a5	.	nonsynonymous SNV	Ugt1a5:NM_201643:exon1:c.G805C:p.V269L	.	het	.	1	88166856	88166856	T	C	het	2652.04	121
1	88200771	88200771	G	A	exonic	Ugt1a2	.	nonsynonymous SNV	Ugt1a2:NM_013701:exon1:c.T135A:p.D45E	.	het	.	1	88200771	88200771	G	A	het	52.64	10
1	88200832	88200832	C	T	exonic	Ugt1a2	.	nonsynonymous SNV	Ugt1a2:NM_013701:exon1:c.G196T:p.V66L	.	het	.	1	88200832	88200832	C	T	het	139.64	22
1	88200936	88200936	A	G	exonic	Ugt1a2	.	nonsynonymous SNV	Ugt1a2:NM_013701:exon1:c.T300G:p.F100L	.	het	.	1	88200936	88200936	A	G	het	643.67	20
1	88200997	88200997	G	A	exonic	Ugt1a2	.	nonsynonymous SNV	Ugt1a2:NM_013701:exon1:c.G361A:p.D121N	.	het	.	1	88200997	88200997	G	A	het	764.64	22
1	88201079	88201079	A	G	exonic	Ugt1a2	.	nonsynonymous SNV	Ugt1a2:NM_013701:exon1:c.T443G:p.I148S	.	het	.	1	88201079	88201079	A	G	het	565.64	19
1	88201136	88201136	T	G	exonic	Ugt1a2	.	nonsynonymous SNV	Ugt1a2:NM_013701:exon1:c.C500G:p.P167R	.	het	.	1	88201136	88201136	T	G	het	525.64	16
1	88201240	88201240	C	T	exonic	Ugt1a2	.	nonsynonymous SNV	Ugt1a2:NM_013701:exon1:c.G604T:p.D202Y	.	het	.	1	88201240	88201240	C	T	het	47.64	21
1	88205135	88205135	A	T	exonic	Dnajb3	.	nonsynonymous SNV	Dnajb3:NM_008299:exon1:c.G544A:p.G182S	.	het	.	1	88205135	88205135	A	T	het	120.64	16
1	88205144	88205144	C	A	exonic	Dnajb3	.	nonsynonymous SNV	Dnajb3:NM_008299:exon1:c.A535T:p.M179L	.	het	.	1	88205144	88205144	C	A	het	114.64	18
1	88205164	88205164	T	A	exonic	Dnajb3	.	nonsynonymous SNV	Dnajb3:NM_008299:exon1:c.C515T:p.S172L	.	het	.	1	88205164	88205164	T	A	het	52.64	15
1	88212026	88212026	A	G	exonic	Ugt1a1	.	nonsynonymous SNV	Ugt1a1:NM_201645:exon1:c.C25G:p.R9G	.	het	.	1	88212026	88212026	A	G	het	683.64	21
1	88212084	88212084	A	G	exonic	Ugt1a1	.	nonsynonymous SNV	Ugt1a1:NM_201645:exon1:c.A83G:p.H28R	.	het	.	1	88212084	88212084	A	G	het	109.64	29
1	88212162	88212162	T	G	exonic	Ugt1a1	.	nonsynonymous SNV	Ugt1a1:NM_201645:exon1:c.A161G:p.Q54R	.	het	.	1	88212162	88212162	T	G	het	982.64	30
1	88212163	88212163	T	C	exonic	Ugt1a1	.	nonsynonymous SNV	Ugt1a1:NM_201645:exon1:c.G162C:p.Q54H	.	het	.	1	88212163	88212163	T	C	het	982.64	30
1	88212164	88212164	A	C	exonic	Ugt1a1	.	nonsynonymous SNV	Ugt1a1:NM_201645:exon1:c.A163C:p.K55Q	.	het	.	1	88212164	88212164	A	C	het	66.64	30
1	88212236	88212236	C	T	exonic	Ugt1a1	.	nonsynonymous SNV	Ugt1a1:NM_201645:exon1:c.A235T:p.R79W	.	hom	.	1	88212236	88212236	C	T	hom	1134.30	34
1	88212248	88212248	G	A	exonic	Ugt1a1	.	nonsynonymous SNV	Ugt1a1:NM_201645:exon1:c.G247A:p.V83M	.	het	.	1	88212248	88212248	G	A	het	1111.65	36
1	88212255	88212255	T	C	exonic	Ugt1a1	.	nonsynonymous SNV	Ugt1a1:NM_201645:exon1:c.T254C:p.F85S	.	het	.	1	88212255	88212255	T	C	het	38.64	39
1	88212300	88212300	C	T	exonic	Ugt1a1	.	nonsynonymous SNV	Ugt1a1:NM_201645:exon1:c.C299T:p.T100I	.	het	.	1	88212300	88212300	C	T	het	1236.64	45
1	88212403	88212403	A	G	exonic	Ugt1a1	.	nonsynonymous SNV	Ugt1a1:NM_201645:exon1:c.C402G:p.H134Q	.	het	.	1	88212403	88212403	A	G	het	1259.64	45
1	88212491	88212491	A	G	exonic	Ugt1a1	.	nonsynonymous SNV	Ugt1a1:NM_201645:exon1:c.C490G:p.Q164E	.	het	.	1	88212491	88212491	A	G	het	190.64	36
1	88212507	88212507	G	A	exonic	Ugt1a1	.	nonsynonymous SNV	Ugt1a1:NM_201645:exon1:c.C506A:p.P169H	.	het	.	1	88212507	88212507	G	A	het	175.64	41
1	88212515	88212515	G	A	exonic	Ugt1a1	.	nonsynonymous SNV	Ugt1a1:NM_201645:exon1:c.T514A:p.Y172N	.	het	.	1	88212515	88212515	G	A	het	1334.64	41
1	88212651	88212651	T	G	exonic	Ugt1a1	.	nonsynonymous SNV	Ugt1a1:NM_201645:exon1:c.T650G:p.L217R	.	het	.	1	88212651	88212651	T	G	het	1851.64	71
1	88212707	88212707	T	A	exonic	Ugt1a1	.	nonsynonymous SNV	Ugt1a1:NM_201645:exon1:c.G706A:p.A236T	.	het	.	1	88212707	88212707	T	A	het	1841.64	73
1	88212770	88212770	C	A	exonic	Ugt1a1	.	nonsynonymous SNV	Ugt1a1:NM_201645:exon1:c.C769A:p.L257M	.	het	.	1	88212770	88212770	C	A	het	1506.64	70
1	88215044	88215044	T	C	exonic	Ugt1a1;Ugt1a10;Ugt1a2;Ugt1a5;Ugt1a6a;Ugt1a6b;Ugt1a7c;Ugt1a8;Ugt1a9	.	nonsynonymous SNV	Ugt1a8:NM_001378375:exon2:c.G856C:p.E286Q,Ugt1a2:NM_013701:exon2:c.G865C:p.E289Q,Ugt1a10:NM_201641:exon2:c.G856C:p.E286Q,Ugt1a7c:NM_201642:exon2:c.G859C:p.E287Q,Ugt1a5:NM_201643:exon2:c.G853C:p.E285Q,Ugt1a9:NM_201644:exon2:c.G850C:p.E284Q,Ugt1a1:NM_201645:exon2:c.G871C:p.E291Q,Ugt1a6a:NM_145079:exon3:c.G859C:p.E287Q,Ugt1a6b:NM_201410:exon3:c.G859C:p.E287Q	.	het	.	1	88215044	88215044	T	C	het	709.64	42
1	88228088	88228088	G	T	exonic	Mroh2a	.	nonsynonymous SNV	Mroh2a:NM_001281466:exon2:c.G21T:p.L7F	.	het	.	1	88228088	88228088	G	T	het	128.64	12
1	88228302	88228302	C	T	exonic	Mroh2a	.	nonsynonymous SNV	Mroh2a:NM_001281466:exon3:c.G155T:p.G52V	.	het	.	1	88228302	88228302	C	T	het	245.64	17
1	88228361	88228361	A	G	exonic	Mroh2a	.	nonsynonymous SNV	Mroh2a:NM_001281466:exon3:c.C214G:p.P72A	.	het	.	1	88228361	88228361	A	G	het	355.64	18
1	88232274	88232274	C	T	exonic	Mroh2a	.	nonsynonymous SNV	Mroh2a:NM_001281466:exon6:c.C587T:p.T196I	.	hom	.	1	88232274	88232274	C	T	hom	461.06	11
1	88232292	88232292	A	G	exonic	Mroh2a	.	nonsynonymous SNV	Mroh2a:NM_001281466:exon6:c.C605G:p.T202R	.	hom	.	1	88232292	88232292	A	G	hom	436.06	10
1	90801277	90801277	A	G	exonic	Col6a3	.	nonsynonymous SNV	Col6a3:NM_001243009:exon9:c.T3941C:p.V1314A,Col6a3:NM_001243008:exon12:c.T5762C:p.V1921A	.	hom	.	1	90801277	90801277	A	G	hom	545.06	15
1	90813344	90813344	0	A	exonic	Col6a3	.	nonsynonymous SNV	Col6a3:NM_001243008:exon6:c.G2365T:p.A789S	.	hom	.	1	90813344	90813344	-	A	hom	562.02	13
1	90813458	90813458	C	G	exonic	Col6a3	.	nonsynonymous SNV	Col6a3:NM_001243008:exon6:c.G2251C:p.A751P	.	hom	.	1	90813458	90813458	C	G	hom	702.06	22
1	90928013	90928013	C	G	exonic	Mlph	.	nonsynonymous SNV	Mlph:NM_053015:exon3:c.C141G:p.S47R	.	hom	.	1	90928013	90928013	C	G	hom	445.06	13
1	90930140	90930140	C	T	exonic	Mlph	.	nonsynonymous SNV	Mlph:NM_053015:exon5:c.G496T:p.D166Y	.	het	.	1	90930140	90930140	C	T	het	447.64	22
1	90939752	90939752	C	T	exonic	Mlph	.	nonsynonymous SNV	Mlph:NM_053015:exon11:c.G1287T:p.Q429H	.	het	.	1	90939752	90939752	C	T	het	278.67	10
1	90941755	90941755	C	T	exonic	Mlph	.	nonsynonymous SNV	Mlph:NM_053015:exon12:c.A1478T:p.K493I	.	het	.	1	90941755	90941755	C	T	het	480.64	19
1	90945620	90945620	G	C	exonic	Mlph	.	nonsynonymous SNV	Mlph:NM_053015:exon15:c.A1652C:p.D551A	.	het	.	1	90945620	90945620	G	C	het	524.64	23
1	90960034	90960034	0	T	exonic	Rab17	.	nonsynonymous SNV	Rab17:NM_001159725:exon4:c.G403A:p.D135N,Rab17:NM_008998:exon4:c.G403A:p.D135N	.	het	.	1	90960034	90960034	-	T	het	232.60	10
1	90960037	90960037	C	A	exonic	Rab17	.	nonsynonymous SNV	Rab17:NM_001159725:exon4:c.A400T:p.T134S,Rab17:NM_008998:exon4:c.A400T:p.T134S	.	het	.	1	90960037	90960037	C	A	het	232.64	10
1	90960038	90960038	G	A	exonic	Rab17	.	nonsynonymous SNV	Rab17:NM_001159725:exon4:c.A399T:p.K133N,Rab17:NM_008998:exon4:c.A399T:p.K133N	.	hom	.	1	90960038	90960038	G	A	hom	411.06	10
1	90960041	90960041	G	C	exonic	Rab17	.	nonsynonymous SNV	Rab17:NM_001159725:exon4:c.C396G:p.N132K,Rab17:NM_008998:exon4:c.C396G:p.N132K	.	het	.	1	90960041	90960041	G	C	het	232.64	10
1	90960053	90960053	0	T	exonic	Rab17	.	nonsynonymous SNV	Rab17:NM_001159725:exon4:c.G384A:p.M128I,Rab17:NM_008998:exon4:c.G384A:p.M128I	.	het	.	1	90960053	90960053	-	T	het	445.60	14
1	90960070	90960070	A	T	exonic	Rab17	.	nonsynonymous SNV	Rab17:NM_001159725:exon4:c.G367A:p.G123R,Rab17:NM_008998:exon4:c.G367A:p.G123R	.	hom	.	1	90960070	90960070	A	T	hom	698.06	16
1	90960079	90960079	C	T	exonic	Rab17	.	nonsynonymous SNV	Rab17:NM_001159725:exon4:c.T358A:p.F120I,Rab17:NM_008998:exon4:c.T358A:p.F120I	.	het	.	1	90960079	90960079	C	T	het	484.64	16
1	90960093	90960093	C	A	exonic	Rab17	.	nonsynonymous SNV	Rab17:NM_001159725:exon4:c.A344T:p.D115V,Rab17:NM_008998:exon4:c.A344T:p.D115V	.	het	.	1	90960093	90960093	C	A	het	442.64	15
1	90960095	90960095	A	G	exonic	Rab17	.	nonsynonymous SNV	Rab17:NM_001159725:exon4:c.A342C:p.E114D,Rab17:NM_008998:exon4:c.A342C:p.E114D	.	het	.	1	90960095	90960095	A	G	het	442.64	15
1	91128086	91128086	G	A	exonic	Lrrfip1	.	nonsynonymous SNV	Lrrfip1:NM_001111312:exon13:c.C1177A:p.L393I,Lrrfip1:NM_008515:exon23:c.C1777A:p.L593I,Lrrfip1:NM_001310732:exon25:c.C1882A:p.L628I	.	het	.	1	91128086	91128086	G	A	het	37.64	12
1	91223309	91223309	T	A	exonic	Ramp1	.	nonsynonymous SNV	Ramp1:NM_016894:exon3:c.T395A:p.L132H	.	hom	.	1	91223309	91223309	T	A	hom	640.06	18
1	91276416	91276416	A	C	exonic	Ube2f	.	nonsynonymous SNV	Ube2f:NM_001355762:exon6:c.T313C:p.W105R,Ube2f:NM_001355763:exon6:c.T313C:p.W105R,Ube2f:NM_026454:exon6:c.T313C:p.W105R,Ube2f:NM_001355761:exon7:c.T313C:p.W105R,Ube2f:NM_001355764:exon7:c.T313C:p.W105R	.	hom	.	1	91276416	91276416	A	C	hom	370.06	10
1	91423758	91423758	G	A	exonic	Per2	.	nonsynonymous SNV	Per2:NM_011066:exon19:c.A3025T:p.T1009S	.	het	.	1	91423758	91423758	G	A	het	476.64	18
1	91424017	91424017	C	G	exonic	Per2	.	nonsynonymous SNV	Per2:NM_011066:exon19:c.G2766C:p.Q922H	.	hom	.	1	91424017	91424017	C	G	hom	487.70	15
1	91424049	91424049	G	A	exonic	Per2	.	nonsynonymous SNV	Per2:NM_011066:exon19:c.C2734T:p.P912S	.	hom	.	1	91424049	91424049	G	A	hom	494.74	16
1	91427756	91427756	T	A	exonic	Per2	.	nonsynonymous SNV	Per2:NM_011066:exon18:c.C2279T:p.A760V	.	het	.	1	91427756	91427756	T	A	het	516.64	17
1	91450654	91450654	G	C	exonic	Per2	.	nonsynonymous SNV	Per2:NM_011066:exon2:c.A172G:p.N58D	.	het	.	1	91450654	91450654	G	C	het	401.64	14
1	91450728	91450728	A	G	exonic	Per2	.	nonsynonymous SNV	Per2:NM_011066:exon2:c.A98C:p.D33A	.	hom	.	1	91450728	91450728	A	G	hom	724.96	20
1	91450760	91450760	C	A	exonic	Per2	.	nonsynonymous SNV	Per2:NM_011066:exon2:c.G66T:p.Q22H	.	hom	.	1	91450760	91450760	C	A	hom	641.04	23
1	91801886	91801886	0	G	exonic	Twist2	.	nonsynonymous SNV	Twist2:NM_007855:exon1:c.C260G:p.A87G	.	het	.	1	91801886	91801886	-	G	het	89.60	27
1	91802026	91802026	0	T	exonic	Twist2	.	nonsynonymous SNV	Twist2:NM_007855:exon1:c.A400T:p.S134C	.	het	.	1	91802026	91802026	-	T	het	34.60	16
1	93191008	93191008	A	C	exonic	Crocc2	.	nonsynonymous SNV	Crocc2:NM_001310428:exon11:c.A1440C:p.Q480H	.	hom	.	1	93191008	93191008	A	C	hom	370.06	11
1	93198467	93198467	C	T	exonic	Crocc2	.	nonsynonymous SNV	Crocc2:NM_001310428:exon16:c.G2230T:p.V744F	.	hom	.	1	93198467	93198467	C	T	hom	362.06	10
1	93613118	93613118	T	C	exonic	Farp2	.	nonsynonymous SNV	Farp2:NM_145519:exon21:c.T2341C:p.F781L	.	het	.	1	93613118	93613118	T	C	het	486.64	21
1	93625854	93625854	C	A	exonic	Stk25	.	nonsynonymous SNV	Stk25:NM_021537:exon7:c.C698T:p.P233L	.	het	.	1	93625854	93625854	C	A	het	309.64	12
1	94024704	94024704	G	A	exonic	Neu4	.	nonsynonymous SNV	Neu4:NM_173772:exon4:c.G725A:p.G242D,Neu4:NM_001310769:exon5:c.G794A:p.G265D	.	het	.	1	94024704	94024704	G	A	het	52.64	10
1	94024769	94024769	T	G	exonic	Neu4	.	nonsynonymous SNV	Neu4:NM_173772:exon4:c.A790G:p.T264A,Neu4:NM_001310769:exon5:c.A859G:p.T287A	.	het	.	1	94024769	94024769	T	G	het	77.64	11
1	105284680	105284680	A	G	exonic	Rnf152	.	nonsynonymous SNV	Rnf152:NM_001160368:exon2:c.T151C:p.C51R,Rnf152:NM_178779:exon3:c.T151C:p.C51R	.	hom	.	1	105284680	105284680	A	G	hom	517.06	14
1	106339531	106339531	T	C	exonic	Phlpp1	.	nonsynonymous SNV	Phlpp1:NM_133821:exon6:c.T2173C:p.F725L	.	hom	.	1	106339531	106339531	T	C	hom	743.06	22
1	110925825	110925825	A	C	exonic	Cdh19	.	nonsynonymous SNV	Cdh19:NM_001081386:exon6:c.T885G:p.D295E,Cdh19:NM_001356415:exon7:c.T885G:p.D295E	.	het	.	1	110925825	110925825	A	C	het	89.64	10
1	118628044	118628044	G	A	exonic	Tfcp2l1	.	nonsynonymous SNV	Tfcp2l1:NM_023755:exon1:c.C4A:p.L2M	.	hom	.	1	118628044	118628044	G	A	hom	394.06	10
1	119955657	119955657	G	A	exonic	Cfap221	.	nonsynonymous SNV	Cfap221:NM_001115074:exon8:c.G783T:p.M261I	.	hom	.	1	119955657	119955657	G	A	hom	908.06	27
1	120043518	120043518	T	C	exonic	Sctr	.	nonsynonymous SNV	Sctr:NM_001311077:exon5:c.T470C:p.L157P,Sctr:NM_001012322:exon6:c.T515C:p.L172P	.	hom	.	1	120043518	120043518	T	C	hom	720.06	18
1	120054293	120054293	G	A	exonic	Sctr	.	nonsynonymous SNV	Sctr:NM_001311077:exon9:c.C870A:p.N290K,Sctr:NM_001012322:exon10:c.C915A:p.N305K	.	hom	.	1	120054293	120054293	G	A	hom	477.06	11
1	120067815	120067815	T	C	exonic	Tmem37	.	nonsynonymous SNV	Tmem37:NM_019432:exon2:c.T531G:p.N177K	.	hom	.	1	120067815	120067815	T	C	hom	459.06	11
1	120171467	120171467	A	G	exonic	3110009E18Rik	.	nonsynonymous SNV	3110009E18Rik:NM_028439:exon5:c.A289G:p.K97E	.	hom	.	1	120171467	120171467	A	G	hom	788.06	24
1	120227652	120227652	C	T	exonic	Steap3	.	nonsynonymous SNV	Steap3:NM_001379354:exon5:c.G1462A:p.V488M,Steap3:NM_001379355:exon5:c.G1492A:p.V498M,Steap3:NM_133186:exon5:c.G1462A:p.V488M,Steap3:NM_001085409:exon6:c.G1462A:p.V488M	.	hom	.	1	120227652	120227652	C	T	hom	421.06	11
1	121482031	121482031	G	T	exonic	Ccdc93	.	nonsynonymous SNV	Ccdc93:NM_001025156:exon15:c.A1178T:p.N393I,Ccdc93:NM_029955:exon15:c.A1175T:p.N392I	.	hom	.	1	121482031	121482031	G	T	hom	566.06	15
1	128287515	128287515	A	C	exonic	Lct	.	nonsynonymous SNV	Lct:NM_001081078:exon15:c.A5323G:p.S1775G	.	het	.	1	128287515	128287515	A	C	het	441.64	20
1	128287560	128287560	G	T	exonic	Lct	.	nonsynonymous SNV	Lct:NM_001081078:exon15:c.G5278A:p.G1760R	.	het	.	1	128287560	128287560	G	T	het	455.64	23
1	128338195	128338195	G	A	exonic	Mcm6	.	nonsynonymous SNV	Mcm6:NM_001313695:exon13:c.C1838T:p.S613L,Mcm6:NM_008567:exon13:c.C1838T:p.S613L	.	hom	.	1	128338195	128338195	G	A	hom	386.06	11
1	130642966	130642966	G	A	exonic	C4bp	.	nonsynonymous SNV	C4bp:NM_007576:exon7:c.G872T:p.G291V	.	het	.	1	130642966	130642966	G	A	het	52.64	10
1	130717503	130717503	G	A	exonic	Yod1	.	nonsynonymous SNV	Yod1:NM_178691:exon1:c.G20A:p.G7D	.	het	.	1	130717503	130717503	G	A	het	76.64	21
1	130717542	130717542	C	T	exonic	Yod1	.	nonsynonymous SNV	Yod1:NM_178691:exon1:c.C59T:p.A20V	.	het	.	1	130717542	130717542	C	T	het	75.64	22
1	130717604	130717604	G	C	exonic	Yod1	.	nonsynonymous SNV	Yod1:NM_178691:exon1:c.A121C:p.M41L	.	het	.	1	130717604	130717604	G	C	het	54.64	20
1	130850838	130850838	T	A	exonic	Pigr	.	nonsynonymous SNV	Pigr:NM_011082:exon11:c.T2258A:p.F753Y	.	het	.	1	130850838	130850838	T	A	het	31.64	17
1	131129521	131129521	G	A	exonic	Dyrk3	.	nonsynonymous SNV	Dyrk3:NM_145508:exon3:c.G914T:p.G305V	.	het	.	1	131129521	131129521	G	A	het	406.64	12
1	131129525	131129525	C	T	exonic	Dyrk3	.	nonsynonymous SNV	Dyrk3:NM_145508:exon3:c.C910A:p.Q304K	.	het	.	1	131129525	131129525	C	T	het	406.64	12
1	131129594	131129594	G	A	exonic	Dyrk3	.	nonsynonymous SNV	Dyrk3:NM_145508:exon3:c.A841T:p.N281Y	.	hom	.	1	131129594	131129594	G	A	hom	330.06	10
1	131160490	131160490	T	C	exonic	Eif2d	.	nonsynonymous SNV	Eif2d:NM_001136070:exon6:c.G611C:p.G204A,Eif2d:NM_010709:exon6:c.G611C:p.G204A	.	het	.	1	131160490	131160490	T	C	het	216.64	11
1	131160526	131160526	C	T	exonic	Eif2d	.	nonsynonymous SNV	Eif2d:NM_001136070:exon6:c.G647T:p.G216V,Eif2d:NM_010709:exon6:c.G647T:p.G216V	.	het	.	1	131160526	131160526	C	T	het	204.64	11
1	131528771	131528771	A	C	exonic	Fam72a	.	nonsynonymous SNV	Fam72a:NM_175382:exon1:c.T71C:p.V24A	.	hom	.	1	131528771	131528771	A	C	hom	421.06	11
1	131672452	131672452	G	A	exonic	Ctse	.	nonsynonymous SNV	Ctse:NM_007799:exon9:c.T938A:p.V313E	.	het	.	1	131672452	131672452	G	A	het	28.64	15
1	131977473	131977473	T	C	exonic	Slc45a3	.	nonsynonymous SNV	Slc45a3:NM_001177628:exon3:c.G233C:p.W78S,Slc45a3:NM_145977:exon3:c.G233C:p.W78S	.	het	.	1	131977473	131977473	T	C	het	150.64	14
1	132053628	132053628	A	G	exonic	Mfsd4a	.	nonsynonymous SNV	Mfsd4a:NM_001114662:exon5:c.A884C:p.N295T,Mfsd4a:NM_172510:exon5:c.A884C:p.N295T	.	het	.	1	132053628	132053628	A	G	het	124.64	24
1	132054077	132054077	A	G	exonic	Mfsd4a	.	nonsynonymous SNV	Mfsd4a:NM_001114662:exon4:c.A829C:p.K277Q,Mfsd4a:NM_172510:exon4:c.A829C:p.K277Q	.	het	.	1	132054077	132054077	A	G	het	115.64	27
1	132122345	132122345	C	T	exonic	Cdk18	.	nonsynonymous SNV	Cdk18:NM_008795:exon2:c.C91A:p.Q31K	.	het	.	1	132122345	132122345	C	T	het	136.64	17
1	132455874	132455874	G	A	exonic	Dstyk	.	nonsynonymous SNV	Dstyk:NM_172516:exon7:c.T1827A:p.H609Q	.	het	.	1	132455874	132455874	G	A	het	587.64	24
1	132463383	132463383	A	G	exonic	Dstyk	.	nonsynonymous SNV	Dstyk:NM_172516:exon13:c.T2656G:p.C886G	.	hom	.	1	132463383	132463383	A	G	hom	690.06	20
1	132463504	132463504	A	G	exonic	Dstyk	.	nonsynonymous SNV	Dstyk:NM_172516:exon13:c.C2777G:p.S926C	.	hom	.	1	132463504	132463504	A	G	hom	800.06	21
1	132528198	132528198	A	G	exonic	Cntn2	.	nonsynonymous SNV	Cntn2:NM_177129:exon6:c.T581C:p.L194P	.	het	.	1	132528198	132528198	A	G	het	608.64	30
1	132583093	132583093	T	C	exonic	Nfasc	.	nonsynonymous SNV	Nfasc:NM_182716:exon27:c.T3191G:p.L1064R	.	het	.	1	132583093	132583093	T	C	het	145.64	17
1	133001294	133001294	A	T	exonic	Mdm4	.	nonsynonymous SNV	Mdm4:NM_001302801:exon8:c.C664A:p.Q222K,Mdm4:NM_001302802:exon8:c.C664A:p.Q222K,Mdm4:NM_001302803:exon8:c.C661A:p.Q221K,Mdm4:NM_001302804:exon8:c.C280A:p.Q94K,Mdm4:NM_008575:exon9:c.C661A:p.Q221K	.	het	.	1	133001294	133001294	A	T	het	523.64	26
1	133092287	133092287	A	G	exonic	Pik3c2b	.	nonsynonymous SNV	Pik3c2b:NM_001099276:exon21:c.A3169G:p.N1057D	.	hom	.	1	133092287	133092287	A	G	hom	642.06	15
1	133092333	133092333	A	T	exonic	Pik3c2b	.	nonsynonymous SNV	Pik3c2b:NM_001099276:exon21:c.C3215T:p.P1072L	.	hom	.	1	133092333	133092333	A	T	hom	240.06	11
1	133098643	133098643	T	C	exonic	Pik3c2b	.	nonsynonymous SNV	Pik3c2b:NM_001099276:exon24:c.T3526C:p.F1176L	.	hom	.	1	133098643	133098643	T	C	hom	561.06	15
1	133098720	133098720	A	C	exonic	Pik3c2b	.	nonsynonymous SNV	Pik3c2b:NM_001099276:exon24:c.G3603C:p.M1201I	.	hom	.	1	133098720	133098720	A	C	hom	457.06	14
1	133132751	133132751	A	G	exonic	Ppp1r15b	.	nonsynonymous SNV	Ppp1r15b:NM_133819:exon1:c.C1005G:p.N335K	.	het	.	1	133132751	133132751	A	G	het	29.64	15
1	133273916	133273916	G	A	exonic	Plekha6	.	nonsynonymous SNV	Plekha6:NM_001160268:exon9:c.T1126A:p.S376T,Plekha6:NM_182930:exon9:c.T1066A:p.S356T	.	hom	.	1	133273916	133273916	G	A	hom	510.06	12
1	133273917	133273917	A	G	exonic	Plekha6	.	nonsynonymous SNV	Plekha6:NM_001160268:exon9:c.C1127G:p.S376C,Plekha6:NM_182930:exon9:c.C1067G:p.S356C	.	hom	.	1	133273917	133273917	A	G	hom	510.06	12
1	133273926	133273926	G	A	exonic	Plekha6	.	nonsynonymous SNV	Plekha6:NM_001160268:exon9:c.C1136A:p.P379H,Plekha6:NM_182930:exon9:c.C1076A:p.P359H	.	hom	.	1	133273926	133273926	G	A	hom	460.06	11
1	133273988	133273988	A	G	exonic	Plekha6	.	nonsynonymous SNV	Plekha6:NM_001160268:exon9:c.T1198G:p.Y400D,Plekha6:NM_182930:exon9:c.T1138G:p.Y380D	.	hom	.	1	133273988	133273988	A	G	hom	751.06	17
1	133273991	133273991	T	C	exonic	Plekha6	.	nonsynonymous SNV	Plekha6:NM_001160268:exon9:c.G1201C:p.D401H,Plekha6:NM_182930:exon9:c.G1141C:p.D381H	.	hom	.	1	133273991	133273991	T	C	hom	796.06	18
1	133274012	133274012	G	A	exonic	Plekha6	.	nonsynonymous SNV	Plekha6:NM_001160268:exon9:c.G1222A:p.A408T,Plekha6:NM_182930:exon9:c.G1162A:p.A388T	.	hom	.	1	133274012	133274012	G	A	hom	680.06	16
1	133274019	133274019	C	T	exonic	Plekha6	.	nonsynonymous SNV	Plekha6:NM_001160268:exon9:c.A1229T:p.E410V,Plekha6:NM_182930:exon9:c.A1169T:p.E390V	.	hom	.	1	133274019	133274019	C	T	hom	680.06	16
1	133274058	133274058	C	T	exonic	Plekha6	.	nonsynonymous SNV	Plekha6:NM_001160268:exon9:c.C1268T:p.T423I,Plekha6:NM_182930:exon9:c.C1208T:p.T403I	.	hom	.	1	133274058	133274058	C	T	hom	706.06	16
1	133274061	133274061	C	T	exonic	Plekha6	.	nonsynonymous SNV	Plekha6:NM_001160268:exon9:c.A1271T:p.Y424F,Plekha6:NM_182930:exon9:c.A1211T:p.Y404F	.	hom	.	1	133274061	133274061	C	T	hom	706.06	16
1	133274105	133274105	G	A	exonic	Plekha6	.	nonsynonymous SNV	Plekha6:NM_001160268:exon9:c.G1315A:p.D439N,Plekha6:NM_182930:exon9:c.G1255A:p.D419N	.	hom	.	1	133274105	133274105	G	A	hom	835.06	20
1	133274211	133274211	C	T	exonic	Plekha6	.	nonsynonymous SNV	Plekha6:NM_001160268:exon9:c.A1421T:p.H474L,Plekha6:NM_182930:exon9:c.A1361T:p.H454L	.	hom	.	1	133274211	133274211	C	T	hom	653.06	15
1	133274222	133274222	A	G	exonic	Plekha6	.	nonsynonymous SNV	Plekha6:NM_001160268:exon9:c.C1432G:p.R478G,Plekha6:NM_182930:exon9:c.C1372G:p.R458G	.	hom	.	1	133274222	133274222	A	G	hom	616.06	14
1	133274226	133274226	C	T	exonic	Plekha6	.	nonsynonymous SNV	Plekha6:NM_001160268:exon9:c.C1436T:p.S479L,Plekha6:NM_182930:exon9:c.C1376T:p.S459L	.	hom	.	1	133274226	133274226	C	T	hom	616.06	14
1	133274336	133274336	G	T	exonic	Plekha6	.	nonsynonymous SNV	Plekha6:NM_001160268:exon9:c.G1546T:p.A516S,Plekha6:NM_182930:exon9:c.G1486T:p.A496S	.	hom	.	1	133274336	133274336	G	T	hom	362.06	10
1	133274349	133274349	G	A	exonic	Plekha6	.	nonsynonymous SNV	Plekha6:NM_001160268:exon9:c.T1559A:p.M520K,Plekha6:NM_182930:exon9:c.T1499A:p.M500K	.	hom	.	1	133274349	133274349	G	A	hom	508.06	14
1	133280390	133280390	A	G	exonic	Plekha6	.	nonsynonymous SNV	Plekha6:NM_001160268:exon10:c.A1636G:p.N546D,Plekha6:NM_182930:exon13:c.A1798G:p.N600D	.	hom	.	1	133280390	133280390	A	G	hom	799.06	26
1	133280398	133280398	C	T	exonic	Plekha6	.	nonsynonymous SNV	Plekha6:NM_001160268:exon10:c.A1644T:p.Q548H,Plekha6:NM_182930:exon13:c.A1806T:p.Q602H	.	het	.	1	133280398	133280398	C	T	het	103.64	23
1	133281809	133281809	G	C	exonic	Plekha6	.	nonsynonymous SNV	Plekha6:NM_001160268:exon11:c.G1680C:p.Q560H,Plekha6:NM_182930:exon14:c.G1842C:p.Q614H	.	het	.	1	133281809	133281809	G	C	het	298.64	18
1	133281810	133281810	T	C	exonic	Plekha6	.	nonsynonymous SNV	Plekha6:NM_001160268:exon11:c.A1681C:p.N561H,Plekha6:NM_182930:exon14:c.A1843C:p.N615H	.	het	.	1	133281810	133281810	T	C	het	298.64	18
1	133281829	133281829	C	T	exonic	Plekha6	.	nonsynonymous SNV	Plekha6:NM_001160268:exon11:c.A1700T:p.Q567L,Plekha6:NM_182930:exon14:c.A1862T:p.Q621L	.	het	.	1	133281829	133281829	C	T	het	253.64	18
1	133281848	133281848	T	C	exonic	Plekha6	.	nonsynonymous SNV	Plekha6:NM_001160268:exon11:c.G1719C:p.Q573H,Plekha6:NM_182930:exon14:c.G1881C:p.Q627H	.	het	.	1	133281848	133281848	T	C	het	253.64	18
1	133281856	133281856	C	T	exonic	Plekha6	.	nonsynonymous SNV	Plekha6:NM_001160268:exon11:c.C1727T:p.A576V,Plekha6:NM_182930:exon14:c.C1889T:p.A630V	.	het	.	1	133281856	133281856	C	T	het	243.64	20
1	133282145	133282145	G	A	exonic	Plekha6	.	nonsynonymous SNV	Plekha6:NM_001160268:exon12:c.C1763A:p.T588N,Plekha6:NM_182930:exon15:c.C1925A:p.T642N	.	hom	.	1	133282145	133282145	G	A	hom	899.06	24
1	133283285	133283285	G	A	exonic	Plekha6	.	nonsynonymous SNV	Plekha6:NM_001160268:exon13:c.T1899A:p.S633R,Plekha6:NM_182930:exon16:c.T2061A:p.S687R	.	het	.	1	133283285	133283285	G	A	het	709.64	31
1	133283286	133283286	T	G	exonic	Plekha6	.	nonsynonymous SNV	Plekha6:NM_001160268:exon13:c.A1900G:p.T634A,Plekha6:NM_182930:exon16:c.A2062G:p.T688A	.	het	.	1	133283286	133283286	T	G	het	709.64	31
1	133283287	133283287	C	A	exonic	Plekha6	.	nonsynonymous SNV	Plekha6:NM_001160268:exon13:c.C1901A:p.T634K,Plekha6:NM_182930:exon16:c.C2063A:p.T688K	.	het	.	1	133283287	133283287	C	A	het	709.64	31
1	133283344	133283344	C	T	exonic	Plekha6	.	nonsynonymous SNV	Plekha6:NM_001160268:exon13:c.A1958T:p.E653V,Plekha6:NM_182930:exon16:c.A2120T:p.E707V	.	het	.	1	133283344	133283344	C	T	het	715.64	37
1	133283354	133283354	A	G	exonic	Plekha6	.	nonsynonymous SNV	Plekha6:NM_001160268:exon13:c.C1968G:p.N656K,Plekha6:NM_182930:exon16:c.C2130G:p.N710K	.	het	.	1	133283354	133283354	A	G	het	658.64	33
1	133283364	133283364	A	G	exonic	Plekha6	.	nonsynonymous SNV	Plekha6:NM_001160268:exon13:c.C1978G:p.Q660E,Plekha6:NM_182930:exon16:c.C2140G:p.Q714E	.	het	.	1	133283364	133283364	A	G	het	655.64	34
1	133284890	133284890	T	C	exonic	Plekha6	.	nonsynonymous SNV	Plekha6:NM_001160268:exon14:c.T1991C:p.L664P,Plekha6:NM_182930:exon17:c.T2153C:p.L718P	.	het	.	1	133284890	133284890	T	C	het	553.64	38
1	133284900	133284900	A	T	exonic	Plekha6	.	nonsynonymous SNV	Plekha6:NM_001160268:exon14:c.A2001T:p.Q667H,Plekha6:NM_182930:exon17:c.A2163T:p.Q721H	.	het	.	1	133284900	133284900	A	T	het	523.64	33
1	133284922	133284922	T	C	exonic	Plekha6	.	nonsynonymous SNV	Plekha6:NM_001160268:exon14:c.A2023C:p.I675L,Plekha6:NM_182930:exon17:c.A2185C:p.I729L	.	het	.	1	133284922	133284922	T	C	het	484.64	31
1	133284944	133284944	G	A	exonic	Plekha6	.	nonsynonymous SNV	Plekha6:NM_001160268:exon14:c.T2045A:p.L682Q,Plekha6:NM_182930:exon17:c.T2207A:p.L736Q	.	het	.	1	133284944	133284944	G	A	het	487.64	30
1	133285312	133285312	A	G	exonic	Plekha6	.	nonsynonymous SNV	Plekha6:NM_001160268:exon15:c.C2158G:p.L720V,Plekha6:NM_182930:exon18:c.C2320G:p.L774V	.	het	.	1	133285312	133285312	A	G	het	745.64	34
1	133286253	133286253	G	A	exonic	Plekha6	.	nonsynonymous SNV	Plekha6:NM_182930:exon19:c.G2401A:p.G801S	.	het	.	1	133286253	133286253	G	A	het	244.64	21
1	133286386	133286386	C	T	exonic	Plekha6	.	nonsynonymous SNV	Plekha6:NM_182930:exon19:c.C2534T:p.A845V	.	het	.	1	133286386	133286386	C	T	het	435.64	28
1	133292374	133292374	G	A	exonic	Plekha6	.	nonsynonymous SNV	Plekha6:NM_001160268:exon18:c.T2492A:p.V831E,Plekha6:NM_182930:exon22:c.T2804A:p.V935E	.	het	.	1	133292374	133292374	G	A	het	610.04	35
1	133292454	133292454	T	G	exonic	Plekha6	.	nonsynonymous SNV	Plekha6:NM_001160268:exon18:c.A2572G:p.K858E,Plekha6:NM_182930:exon22:c.A2884G:p.K962E	.	hom	.	1	133292454	133292454	T	G	hom	1419.06	39
1	133293828	133293828	T	C	exonic	Plekha6	.	nonsynonymous SNV	Plekha6:NM_001160268:exon19:c.G2769C:p.K923N,Plekha6:NM_182930:exon23:c.G3081C:p.K1027N	.	hom	.	1	133293828	133293828	T	C	hom	638.06	17
1	133293866	133293866	0	A	exonic	Plekha6	.	nonsynonymous SNV	Plekha6:NM_001160268:exon19:c.G2807A:p.S936N,Plekha6:NM_182930:exon23:c.G3119A:p.S1040N	.	hom	.	1	133293866	133293866	-	A	hom	518.02	12
1	133293961	133293961	G	A	exonic	Plekha6	.	nonsynonymous SNV	Plekha6:NM_001160268:exon20:c.C2822A:p.T941N,Plekha6:NM_182930:exon24:c.C3134A:p.T1045N	.	het	.	1	133293961	133293961	G	A	het	354.64	20
1	133294020	133294020	A	G	exonic	Plekha6	.	nonsynonymous SNV	Plekha6:NM_001160268:exon20:c.A2881G:p.S961G,Plekha6:NM_182930:exon24:c.A3193G:p.S1065G	.	het	.	1	133294020	133294020	A	G	het	323.64	27
1	133298922	133298922	G	A	exonic	Plekha6	.	nonsynonymous SNV	Plekha6:NM_001160268:exon22:c.C3097A:p.Q1033K,Plekha6:NM_182930:exon26:c.C3409A:p.Q1137K	.	hom	.	1	133298922	133298922	G	A	hom	720.06	17
1	133309908	133309908	C	A	exonic	Golt1a	.	nonsynonymous SNV	Golt1a:NM_026680:exon1:c.C22A:p.Q8K	.	hom	.	1	133309908	133309908	C	A	hom	1066.06	24
1	133320267	133320267	G	A	exonic	Golt1a	.	nonsynonymous SNV	Golt1a:NM_026680:exon3:c.G232A:p.V78M	.	hom	.	1	133320267	133320267	G	A	hom	608.06	14
1	133327284	133327284	A	C	exonic	Kiss1	.	nonsynonymous SNV	Kiss1:NM_178260:exon1:c.T35C:p.L12P	.	het	.	1	133327284	133327284	A	C	het	152.64	13
1	133386768	133386768	A	C	exonic	Sox13	.	nonsynonymous SNV	Sox13:NM_011439:exon9:c.T998G:p.L333R	.	hom	.	1	133386768	133386768	A	C	hom	547.06	14
1	133728811	133728811	A	T	exonic	Atp2b4	.	nonsynonymous SNV	Atp2b4:NM_001167949:exon12:c.T2100A:p.N700K,Atp2b4:NM_213616:exon12:c.T2100A:p.N700K	.	hom	.	1	133728811	133728811	A	T	hom	420.06	13
1	133731694	133731694	G	C	exonic	Atp2b4	.	nonsynonymous SNV	Atp2b4:NM_001167949:exon9:c.C1529G:p.S510C,Atp2b4:NM_213616:exon9:c.C1529G:p.S510C	.	het	.	1	133731694	133731694	G	C	het	187.64	10
1	133731701	133731701	C	A	exonic	Atp2b4	.	nonsynonymous SNV	Atp2b4:NM_001167949:exon9:c.G1522T:p.G508C,Atp2b4:NM_213616:exon9:c.G1522T:p.G508C	.	het	.	1	133731701	133731701	C	A	het	183.64	10
1	133731702	133731702	G	C	exonic	Atp2b4	.	nonsynonymous SNV	Atp2b4:NM_001167949:exon9:c.T1521G:p.N507K,Atp2b4:NM_213616:exon9:c.T1521G:p.N507K	.	het	.	1	133731702	133731702	G	C	het	184.64	11
1	134140277	134140277	C	T	exonic	Chit1	.	nonsynonymous SNV	Chit1:NM_001284524:exon3:c.A43T:p.M15L,Chit1:NM_001284525:exon3:c.A43T:p.M15L,Chit1:NM_027979:exon3:c.A43T:p.M15L	.	het	.	1	134140277	134140277	C	T	het	199.64	14
1	134143378	134143378	A	G	exonic	Chit1	.	nonsynonymous SNV	Chit1:NM_001284524:exon4:c.A194G:p.Q65R,Chit1:NM_001284525:exon4:c.A194G:p.Q65R,Chit1:NM_027979:exon4:c.A194G:p.Q65R	.	het	.	1	134143378	134143378	A	G	het	39.64	10
1	134145630	134145630	T	A	exonic	Chit1	.	nonsynonymous SNV	Chit1:NM_001284524:exon7:c.G520A:p.G174R,Chit1:NM_001284525:exon7:c.G520A:p.G174R,Chit1:NM_027979:exon7:c.G520A:p.G174R	.	het	.	1	134145630	134145630	T	A	het	210.64	21
1	134146575	134146575	T	C	exonic	Chit1	.	nonsynonymous SNV	Chit1:NM_001284524:exon8:c.A619C:p.I207L,Chit1:NM_001284525:exon8:c.A619C:p.I207L,Chit1:NM_027979:exon8:c.A619C:p.I207L	.	het	.	1	134146575	134146575	T	C	het	34.64	13
1	134146672	134146672	A	G	exonic	Chit1	.	nonsynonymous SNV	Chit1:NM_001284524:exon8:c.C716G:p.A239G,Chit1:NM_001284525:exon8:c.C716G:p.A239G,Chit1:NM_027979:exon8:c.C716G:p.A239G	.	het	.	1	134146672	134146672	A	G	het	49.64	18
1	134423051	134423051	C	T	exonic	Adipor1	.	nonsynonymous SNV	Adipor1:NM_001306069:exon2:c.A37T:p.N13Y,Adipor1:NM_028320:exon2:c.A37T:p.N13Y	.	het	.	1	134423051	134423051	C	T	het	24.64	15
1	134624958	134624958	C	T	exonic	Kdm5b	.	nonsynonymous SNV	Kdm5b:NM_152895:exon23:c.C3671T:p.S1224L	.	het	.	1	134624958	134624958	C	T	het	81.64	11
1	134627323	134627323	C	T	exonic	Kdm5b	.	nonsynonymous SNV	Kdm5b:NM_152895:exon24:c.C3968T:p.T1323I	.	het	.	1	134627323	134627323	C	T	het	288.64	25
1	134630463	134630463	T	G	exonic	Kdm5b	.	nonsynonymous SNV	Kdm5b:NM_152895:exon26:c.A4207G:p.I1403V	.	het	.	1	134630463	134630463	T	G	het	52.64	10
1	134630505	134630505	G	A	exonic	Kdm5b	.	nonsynonymous SNV	Kdm5b:NM_152895:exon26:c.G4249A:p.E1417K	.	het	.	1	134630505	134630505	G	A	het	118.64	11
1	134630661	134630661	G	T	exonic	Kdm5b	.	nonsynonymous SNV	Kdm5b:NM_152895:exon26:c.C4405T:p.P1469S	.	het	.	1	134630661	134630661	G	T	het	172.64	15
1	134631297	134631297	A	T	exonic	Kdm5b	.	nonsynonymous SNV	Kdm5b:NM_152895:exon27:c.G4558T:p.V1520F	.	het	.	1	134631297	134631297	A	T	het	109.64	18
1	134631364	134631364	T	C	exonic	Kdm5b	.	nonsynonymous SNV	Kdm5b:NM_152895:exon27:c.G4625C:p.S1542T	.	het	.	1	134631364	134631364	T	C	het	46.64	12
1	134743961	134743961	A	G	exonic	Syt2	.	nonsynonymous SNV	Syt2:NM_001355726:exon5:c.T476G:p.L159R,Syt2:NM_009307:exon6:c.T476G:p.L159R	.	het	.	1	134743961	134743961	A	G	het	271.64	12
1	134744432	134744432	C	A	exonic	Syt2	.	nonsynonymous SNV	Syt2:NM_001355726:exon6:c.G691A:p.D231N,Syt2:NM_009307:exon7:c.G691A:p.D231N	.	het	.	1	134744432	134744432	C	A	het	101.64	18
1	134988050	134988050	T	C	exonic	Lgr6	.	nonsynonymous SNV	Lgr6:NM_001033409:exon18:c.T1790G:p.V597G	.	het	.	1	134988050	134988050	T	C	het	114.64	14
1	134998206	134998206	C	G	exonic	Lgr6	.	nonsynonymous SNV	Lgr6:NM_001033409:exon13:c.A1187C:p.Q396P	.	het	.	1	134998206	134998206	C	G	het	81.64	11
1	135003226	135003226	C	T	exonic	Lgr6	.	nonsynonymous SNV	Lgr6:NM_001033409:exon9:c.C903A:p.F301L	.	het	.	1	135003226	135003226	C	T	het	84.64	16
1	135166976	135166976	A	G	exonic	Gpr37l1	.	nonsynonymous SNV	Gpr37l1:NM_134438:exon1:c.T529C:p.F177L	.	het	.	1	135166976	135166976	A	G	het	78.64	15
1	135166999	135166999	T	C	exonic	Gpr37l1	.	nonsynonymous SNV	Gpr37l1:NM_134438:exon1:c.T506G:p.L169R	.	het	.	1	135166999	135166999	T	C	het	69.64	18
1	135167476	135167476	T	C	exonic	Gpr37l1	.	nonsynonymous SNV	Gpr37l1:NM_134438:exon1:c.C29G:p.S10C	.	het	.	1	135167476	135167476	T	C	het	129.64	18
1	135268083	135268083	G	T	exonic	Rnpep	.	nonsynonymous SNV	Rnpep:NM_001159624:exon5:c.G1087A:p.G363S,Rnpep:NM_145417:exon6:c.G1204A:p.G402S	.	het	.	1	135268083	135268083	G	T	het	224.64	19
1	135268098	135268098	A	T	exonic	Rnpep	.	nonsynonymous SNV	Rnpep:NM_001159624:exon5:c.G1072A:p.V358M,Rnpep:NM_145417:exon6:c.G1189A:p.V397M	.	het	.	1	135268098	135268098	A	T	het	221.64	20
1	135268172	135268172	T	C	exonic	Rnpep	.	nonsynonymous SNV	Rnpep:NM_001159624:exon5:c.C998G:p.A333G,Rnpep:NM_145417:exon6:c.C1115G:p.A372G	.	het	.	1	135268172	135268172	T	C	het	151.64	22
1	135271681	135271681	G	T	exonic	Rnpep	.	nonsynonymous SNV	Rnpep:NM_001159624:exon4:c.T821A:p.L274Q,Rnpep:NM_145417:exon5:c.T938A:p.L313Q	.	het	.	1	135271681	135271681	G	T	het	88.64	12
1	135391609	135391609	T	C	exonic	Ipo9	.	nonsynonymous SNV	Ipo9:NM_153774:exon16:c.A1891G:p.K631E,Ipo9:NM_001357575:exon17:c.A1783G:p.K595E,Ipo9:NM_001357576:exon17:c.A1438G:p.K480E,Ipo9:NM_001357578:exon17:c.A1045G:p.K349E,Ipo9:NM_001357577:exon18:c.A1438G:p.K480E	.	het	.	1	135391609	135391609	T	C	het	170.64	22
1	135394186	135394186	A	G	exonic	Ipo9	.	nonsynonymous SNV	Ipo9:NM_153774:exon15:c.A1805C:p.E602A,Ipo9:NM_001357575:exon16:c.A1697C:p.E566A,Ipo9:NM_001357576:exon16:c.A1352C:p.E451A,Ipo9:NM_001357578:exon16:c.A959C:p.E320A,Ipo9:NM_001357577:exon17:c.A1352C:p.E451A	.	het	.	1	135394186	135394186	A	G	het	178.64	18
1	135394300	135394300	T	C	exonic	Ipo9	.	nonsynonymous SNV	Ipo9:NM_153774:exon15:c.T1691G:p.I564S,Ipo9:NM_001357575:exon16:c.T1583G:p.I528S,Ipo9:NM_001357576:exon16:c.T1238G:p.I413S,Ipo9:NM_001357578:exon16:c.T845G:p.I282S,Ipo9:NM_001357577:exon17:c.T1238G:p.I413S	.	het	.	1	135394300	135394300	T	C	het	53.64	18
1	135394310	135394310	G	T	exonic	Ipo9	.	nonsynonymous SNV	Ipo9:NM_153774:exon15:c.C1681A:p.L561I,Ipo9:NM_001357575:exon16:c.C1573A:p.L525I,Ipo9:NM_001357576:exon16:c.C1228A:p.L410I,Ipo9:NM_001357578:exon16:c.C835A:p.L279I,Ipo9:NM_001357577:exon17:c.C1228A:p.L410I	.	het	.	1	135394310	135394310	G	T	het	31.64	17
1	135458676	135458676	A	G	exonic	Nav1	.	nonsynonymous SNV	Nav1:NM_173437:exon16:c.A3613C:p.K1205Q	.	het	.	1	135458676	135458676	A	G	het	98.64	19
1	135460404	135460404	G	A	exonic	Nav1	.	nonsynonymous SNV	Nav1:NM_173437:exon15:c.A3451T:p.N1151Y	.	het	.	1	135460404	135460404	G	A	het	152.64	30
1	135469947	135469947	C	G	exonic	Nav1	.	nonsynonymous SNV	Nav1:NM_173437:exon7:c.A2483C:p.H828P	.	het	.	1	135469947	135469947	C	G	het	162.64	25
1	135469990	135469990	G	T	exonic	Nav1	.	nonsynonymous SNV	Nav1:NM_173437:exon7:c.C2440A:p.P814T	.	het	.	1	135469990	135469990	G	T	het	185.64	26
1	135470064	135470064	A	C	exonic	Nav1	.	nonsynonymous SNV	Nav1:NM_173437:exon7:c.C2366G:p.A789G	.	het	.	1	135470064	135470064	A	C	het	103.64	27
1	135470733	135470733	C	T	exonic	Nav1	.	nonsynonymous SNV	Nav1:NM_173437:exon6:c.C2110A:p.L704I	.	het	.	1	135470733	135470733	C	T	het	84.64	13
1	135470748	135470748	A	G	exonic	Nav1	.	nonsynonymous SNV	Nav1:NM_173437:exon6:c.A2095C:p.S699R	.	het	.	1	135470748	135470748	A	G	het	85.64	13
1	135471019	135471019	A	C	exonic	Nav1	.	nonsynonymous SNV	Nav1:NM_173437:exon6:c.T1824G:p.F608L	.	het	.	1	135471019	135471019	A	C	het	181.64	12
1	135472452	135472452	G	A	exonic	Nav1	.	nonsynonymous SNV	Nav1:NM_173437:exon5:c.G1379T:p.R460L	.	het	.	1	135472452	135472452	G	A	het	28.64	15
1	135532427	135532427	A	G	exonic	Nav1	.	nonsynonymous SNV	Nav1:NM_173437:exon3:c.T1157C:p.V386A	.	het	.	1	135532427	135532427	A	G	het	97.64	10
1	135532674	135532674	C	T	exonic	Nav1	.	nonsynonymous SNV	Nav1:NM_173437:exon3:c.C910A:p.P304T	.	het	.	1	135532674	135532674	C	T	het	64.64	18
1	135827886	135827886	T	G	exonic	Lad1	.	nonsynonymous SNV	Lad1:NM_133664:exon3:c.C899G:p.A300G	.	het	.	1	135827886	135827886	T	G	het	41.64	11
1	135955600	135955600	C	T	exonic	Igfn1	.	nonsynonymous SNV	Igfn1:NM_177642:exon25:c.C8167A:p.P2723T	.	het	.	1	135955600	135955600	C	T	het	82.64	23
1	135964893	135964893	C	T	exonic	Igfn1	.	nonsynonymous SNV	Igfn1:NM_177642:exon18:c.C6488A:p.P2163Q	.	het	.	1	135964893	135964893	C	T	het	38.64	12
1	135968467	135968467	C	T	exonic	Igfn1	.	nonsynonymous SNV	Igfn1:NM_177642:exon15:c.G4360A:p.G1454R	.	het	.	1	135968467	135968467	C	T	het	128.64	24
1	135968607	135968607	A	T	exonic	Igfn1	.	nonsynonymous SNV	Igfn1:NM_177642:exon15:c.G4220A:p.S1407N	.	het	.	1	135968607	135968607	A	T	het	184.64	26
1	135968608	135968608	T	C	exonic	Igfn1	.	nonsynonymous SNV	Igfn1:NM_177642:exon15:c.A4219G:p.S1407G	.	het	.	1	135968608	135968608	T	C	het	184.64	26
1	135968941	135968941	A	G	exonic	Igfn1	.	nonsynonymous SNV	Igfn1:NM_177642:exon15:c.G3886C:p.D1296H	.	het	.	1	135968941	135968941	A	G	het	256.64	27
1	135969840	135969840	A	G	exonic	Igfn1	.	nonsynonymous SNV	Igfn1:NM_177642:exon15:c.G2987C:p.G996A	.	het	.	1	135969840	135969840	A	G	het	90.64	11
1	135998623	135998623	C	T	exonic	Igfn1	.	nonsynonymous SNV	Igfn1:NM_177642:exon2:c.G88A:p.E30K	.	het	.	1	135998623	135998623	C	T	het	31.64	14
1	136051177	136051177	G	A	exonic	Ascl5	.	nonsynonymous SNV	Ascl5:NM_001270609:exon1:c.C374A:p.A125D	.	het	.	1	136051177	136051177	G	A	het	189.64	31
1	136088392	136088392	G	A	exonic	Cacna1s	.	nonsynonymous SNV	Cacna1s:NM_001081023:exon15:c.C2153A:p.A718D,Cacna1s:NM_014193:exon15:c.C2153A:p.A718D	.	het	.	1	136088392	136088392	G	A	het	167.64	20
1	136095837	136095837	A	C	exonic	Cacna1s	.	nonsynonymous SNV	Cacna1s:NM_001081023:exon22:c.T2813C:p.L938P,Cacna1s:NM_014193:exon22:c.T2813C:p.L938P	.	het	.	1	136095837	136095837	A	C	het	46.64	23
1	136097094	136097094	G	A	exonic	Cacna1s	.	nonsynonymous SNV	Cacna1s:NM_001081023:exon23:c.G2870A:p.C957Y,Cacna1s:NM_014193:exon23:c.G2870A:p.C957Y	.	het	.	1	136097094	136097094	G	A	het	104.64	20
1	136115986	136115986	C	G	exonic	Cacna1s	.	nonsynonymous SNV	Cacna1s:NM_014193:exon39:c.C4802G:p.P1601R,Cacna1s:NM_001081023:exon40:c.C4859G:p.P1620R	.	het	.	1	136115986	136115986	C	G	het	77.64	11
1	136119011	136119011	T	A	exonic	Cacna1s	.	nonsynonymous SNV	Cacna1s:NM_014193:exon43:c.G5377A:p.A1793T,Cacna1s:NM_001081023:exon44:c.G5440A:p.A1814T	.	het	.	1	136119011	136119011	T	A	het	43.64	10
1	136169198	136169198	C	T	exonic	Kif21b	.	nonsynonymous SNV	Kif21b:NM_001039472:exon29:c.C3860T:p.T1287I	.	het	.	1	136169198	136169198	C	T	het	47.64	34
1	136191614	136191614	C	T	exonic	Mroh3	.	nonsynonymous SNV	Mroh3:NM_001329610:exon14:c.C1430A:p.S477Y	.	het	.	1	136191614	136191614	C	T	het	113.64	17
1	136191645	136191645	C	T	exonic	Mroh3	.	nonsynonymous SNV	Mroh3:NM_001329610:exon14:c.C1399A:p.Q467K	.	het	.	1	136191645	136191645	C	T	het	121.64	17
1	136292963	136292963	C	G	exonic	Camsap2	.	nonsynonymous SNV	Camsap2:NM_001347110:exon6:c.A844C:p.I282L,Camsap2:NM_001347109:exon7:c.A877C:p.I293L	.	het	.	1	136292963	136292963	C	G	het	95.64	23
1	136292991	136292991	T	G	exonic	Camsap2	.	nonsynonymous SNV	Camsap2:NM_001347110:exon6:c.G816C:p.L272F,Camsap2:NM_001347109:exon7:c.G849C:p.L283F	.	het	.	1	136292991	136292991	T	G	het	98.64	22
1	136416738	136416738	A	G	exonic	Ddx59	.	nonsynonymous SNV	Ddx59:NM_026500:exon2:c.A146G:p.E49G	.	het	.	1	136416738	136416738	A	G	het	236.64	21
1	136416854	136416854	T	A	exonic	Ddx59	.	nonsynonymous SNV	Ddx59:NM_026500:exon2:c.G262A:p.E88K	.	het	.	1	136416854	136416854	T	A	het	51.64	11
1	136417023	136417023	C	T	exonic	Ddx59	.	nonsynonymous SNV	Ddx59:NM_026500:exon2:c.G431T:p.G144V	.	het	.	1	136417023	136417023	C	T	het	84.64	10
1	136417367	136417367	A	G	exonic	Ddx59	.	nonsynonymous SNV	Ddx59:NM_026500:exon2:c.C775G:p.L259V	.	het	.	1	136417367	136417367	A	G	het	46.64	12
1	136419522	136419522	G	A	exonic	Ddx59	.	nonsynonymous SNV	Ddx59:NM_026500:exon3:c.T917A:p.L306H	.	het	.	1	136419522	136419522	G	A	het	34.64	16
1	136516353	136516353	A	G	exonic	Kif14	.	nonsynonymous SNV	Kif14:NM_001287179:exon24:c.T4082G:p.F1361C	.	het	.	1	136516353	136516353	A	G	het	34.64	13
1	136516374	136516374	A	T	exonic	Kif14	.	nonsynonymous SNV	Kif14:NM_001287179:exon24:c.C4103T:p.A1368V	.	het	.	1	136516374	136516374	A	T	het	43.64	13
1	143615360	143615360	G	T	exonic	Cdc73	.	nonsynonymous SNV	Cdc73:NM_145991:exon15:c.T1360A:p.F454I	.	het	.	1	143615360	143615360	G	T	het	115.64	12
1	143615392	143615392	T	C	exonic	Cdc73	.	nonsynonymous SNV	Cdc73:NM_145991:exon15:c.T1328G:p.V443G	.	het	.	1	143615392	143615392	T	C	het	161.64	12
1	151411221	151411221	G	A	exonic	Swt1	.	nonsynonymous SNV	Swt1:NM_025819:exon6:c.G519T:p.Q173H	.	het	.	1	151411221	151411221	G	A	het	49.64	11
1	151411254	151411254	T	C	exonic	Swt1	.	nonsynonymous SNV	Swt1:NM_025819:exon6:c.T486G:p.I162M	.	het	.	1	151411254	151411254	T	C	het	54.64	14
1	151411300	151411300	A	G	exonic	Swt1	.	nonsynonymous SNV	Swt1:NM_025819:exon6:c.G440C:p.G147A	.	het	.	1	151411300	151411300	A	G	het	76.64	17
1	151411379	151411379	G	A	exonic	Swt1	.	nonsynonymous SNV	Swt1:NM_025819:exon6:c.A361T:p.N121Y	.	het	.	1	151411379	151411379	G	A	het	91.64	12
1	152489872	152489872	G	A	exonic	Colgalt2	.	nonsynonymous SNV	Colgalt2:NM_177756:exon6:c.C922A:p.L308I	.	het	.	1	152489872	152489872	G	A	het	75.64	13
1	152489884	152489884	G	A	exonic	Colgalt2	.	nonsynonymous SNV	Colgalt2:NM_177756:exon6:c.C934A:p.Q312K	.	het	.	1	152489884	152489884	G	A	het	31.64	14
1	153112447	153112447	C	T	exonic	Nmnat2	.	nonsynonymous SNV	Nmnat2:NM_175460:exon10:c.G821T:p.R274M	.	het	.	1	153112447	153112447	C	T	het	49.64	11
1	153141576	153141576	G	A	exonic	Lamc2	.	nonsynonymous SNV	Lamc2:NM_008485:exon12:c.C1664T:p.A555V	.	het	.	1	153141576	153141576	G	A	het	63.64	17
1	153141679	153141679	T	C	exonic	Lamc2	.	nonsynonymous SNV	Lamc2:NM_008485:exon12:c.A1561G:p.N521D	.	het	.	1	153141679	153141679	T	C	het	34.64	16
1	153262439	153262439	T	G	exonic	Lamc1	.	nonsynonymous SNV	Lamc1:NM_010683:exon2:c.T668C:p.L223P	.	het	.	1	153262439	153262439	T	G	het	154.64	14
1	153262460	153262460	A	G	exonic	Lamc1	.	nonsynonymous SNV	Lamc1:NM_010683:exon2:c.G647C:p.G216A	.	het	.	1	153262460	153262460	A	G	het	97.64	10
1	153262463	153262463	G	A	exonic	Lamc1	.	nonsynonymous SNV	Lamc1:NM_010683:exon2:c.G644T:p.G215V	.	het	.	1	153262463	153262463	G	A	het	97.64	10
1	153262576	153262576	G	C	exonic	Lamc1	.	nonsynonymous SNV	Lamc1:NM_010683:exon2:c.T531G:p.S177R	.	het	.	1	153262576	153262576	G	C	het	160.64	19
1	153262643	153262643	T	C	exonic	Lamc1	.	nonsynonymous SNV	Lamc1:NM_010683:exon2:c.C464G:p.P155R	.	het	.	1	153262643	153262643	T	C	het	35.64	11
1	153425389	153425389	C	T	exonic	Shcbp1l	.	nonsynonymous SNV	Shcbp1l:NM_001033162:exon1:c.G166T:p.G56C	.	het	.	1	153425389	153425389	C	T	het	31.64	17
1	153425433	153425433	A	C	exonic	Shcbp1l	.	nonsynonymous SNV	Shcbp1l:NM_001033162:exon1:c.A210C:p.Q70H	.	het	.	1	153425433	153425433	A	C	het	34.64	16
1	153433377	153433377	T	G	exonic	Shcbp1l	.	nonsynonymous SNV	Shcbp1l:NM_001033162:exon3:c.T716G:p.L239R	.	het	.	1	153433377	153433377	T	G	het	28.64	18
1	153445915	153445915	A	G	exonic	Shcbp1l	.	nonsynonymous SNV	Shcbp1l:NM_001033162:exon7:c.A1258G:p.N420D	.	het	.	1	153445915	153445915	A	G	het	43.64	10
1	153762163	153762163	A	G	exonic	Rnasel	.	nonsynonymous SNV	Rnasel:NM_011882:exon9:c.C2081G:p.T694R	.	het	.	1	153762163	153762163	A	G	het	119.64	15
1	153762270	153762270	G	A	exonic	Rnasel	.	nonsynonymous SNV	Rnasel:NM_011882:exon9:c.C2188A:p.P730T	.	het	.	1	153762270	153762270	G	A	het	106.64	22
1	155779306	155779306	A	G	exonic	Qsox1	.	nonsynonymous SNV	Qsox1:NM_001024945:exon12:c.G2110C:p.G704R	.	het	.	1	155779306	155779306	A	G	het	244.64	21
1	155779681	155779681	G	A	exonic	Qsox1	.	nonsynonymous SNV	Qsox1:NM_001024945:exon12:c.G1735T:p.V579L	.	het	.	1	155779681	155779681	G	A	het	25.64	15
1	155779746	155779746	C	T	exonic	Qsox1	.	nonsynonymous SNV	Qsox1:NM_001024945:exon12:c.G1670A:p.R557K,Qsox1:NM_023268:exon12:c.G1670A:p.R557K	.	het	.	1	155779746	155779746	C	T	het	72.64	14
1	155779822	155779822	C	T	exonic	Qsox1	.	nonsynonymous SNV	Qsox1:NM_001024945:exon12:c.C1594A:p.L532I,Qsox1:NM_023268:exon12:c.C1594A:p.L532I	.	het	.	1	155779822	155779822	C	T	het	111.64	15
1	155786799	155786799	A	G	exonic	Qsox1	.	nonsynonymous SNV	Qsox1:NM_001024945:exon8:c.G1021C:p.A341P,Qsox1:NM_023268:exon8:c.G1021C:p.A341P	.	het	.	1	155786799	155786799	A	G	het	52.64	10
1	155878948	155878948	G	C	exonic	Cep350	.	nonsynonymous SNV	Cep350:NM_001039184:exon29:c.T5920G:p.F1974V	.	het	.	1	155878948	155878948	G	C	het	71.64	13
1	155911940	155911940	A	G	exonic	Cep350	.	nonsynonymous SNV	Cep350:NM_001039184:exon18:c.A4151C:p.E1384A	.	het	.	1	155911940	155911940	A	G	het	201.64	14
1	155940791	155940791	G	A	exonic	Cep350	.	nonsynonymous SNV	Cep350:NM_001039184:exon8:c.A1157T:p.K386I	.	het	.	1	155940791	155940791	G	A	het	101.64	10
1	155953706	155953706	T	C	exonic	Cep350	.	nonsynonymous SNV	Cep350:NM_001039184:exon6:c.T451G:p.C151G	.	het	.	1	155953706	155953706	T	C	het	37.64	12
1	155953731	155953731	C	T	exonic	Cep350	.	nonsynonymous SNV	Cep350:NM_001039184:exon6:c.T426A:p.S142R	.	het	.	1	155953731	155953731	C	T	het	41.64	12
1	156007601	156007601	A	C	exonic	Tor1aip1	.	nonsynonymous SNV	Tor1aip1:NM_144791:exon7:c.C887G:p.A296G,Tor1aip1:NM_001160018:exon10:c.C1055G:p.A352G,Tor1aip1:NM_001160019:exon10:c.C500G:p.A167G	.	het	.	1	156007601	156007601	A	C	het	148.64	23
1	160942575	160942575	C	T	exonic	Rc3h1	.	nonsynonymous SNV	Rc3h1:NM_001024952:exon6:c.A816T:p.E272D	.	het	.	1	160942575	160942575	C	T	het	83.64	12
1	160942608	160942608	A	G	exonic	Rc3h1	.	nonsynonymous SNV	Rc3h1:NM_001024952:exon6:c.T849G:p.H283Q	.	het	.	1	160942608	160942608	A	G	het	81.64	14
1	160954810	160954810	0	T	exonic	Rc3h1	.	nonsynonymous SNV	Rc3h1:NM_001024952:exon12:c.G1858T:p.V620L	.	het	.	1	160954810	160954810	-	T	het	84.60	10
1	160954912	160954912	A	G	exonic	Rc3h1	.	nonsynonymous SNV	Rc3h1:NM_001024952:exon12:c.T1960G:p.Y654D	.	het	.	1	160954912	160954912	A	G	het	49.64	11
1	160997530	160997530	A	G	exonic	Serpinc1	.	nonsynonymous SNV	Serpinc1:NM_001379302:exon5:c.C583G:p.L195V,Serpinc1:NM_080844:exon6:c.C946G:p.L316V	.	het	.	1	160997530	160997530	A	G	het	159.64	11
1	165504002	165504002	G	A	exonic	Adcy10	.	nonsynonymous SNV	Adcy10:NM_173029:exon3:c.C203A:p.A68D	.	het	.	1	165504002	165504002	G	A	het	22.64	20
1	165504014	165504014	G	A	exonic	Adcy10	.	nonsynonymous SNV	Adcy10:NM_173029:exon3:c.T215A:p.V72E	.	het	.	1	165504014	165504014	G	A	het	60.64	21
1	165604632	165604632	T	C	exonic	Mpzl1	.	nonsynonymous SNV	Mpzl1:NM_001001880:exon4:c.C583G:p.H195D,Mpzl1:NM_001083897:exon4:c.C583G:p.H195D	.	het	.	1	165604632	165604632	T	C	het	95.64	21
1	168209401	168209401	T	A	exonic	Pbx1	.	nonsynonymous SNV	Pbx1:NM_001291508:exon3:c.C460T:p.L154F,Pbx1:NM_001291509:exon3:c.C460T:p.L154F,Pbx1:NM_008783:exon3:c.C460T:p.L154F,Pbx1:NM_183355:exon3:c.C460T:p.L154F	.	het	.	1	168209401	168209401	T	A	het	250.64	12
1	170215195	170215195	A	C	exonic	Uhmk1	.	nonsynonymous SNV	Uhmk1:NM_010633:exon1:c.C46G:p.L16V	.	het	.	1	170215195	170215195	A	C	het	347.64	19
1	170349436	170349436	T	C	exonic	Nos1ap	.	nonsynonymous SNV	Nos1ap:NM_001109985:exon5:c.A397G:p.S133G	.	het	.	1	170349436	170349436	T	C	het	433.64	18
1	170349442	170349442	C	G	exonic	Nos1ap	.	nonsynonymous SNV	Nos1ap:NM_001109985:exon5:c.G391C:p.G131R	.	het	.	1	170349442	170349442	C	G	het	433.64	18
1	170349489	170349489	G	C	exonic	Nos1ap	.	nonsynonymous SNV	Nos1ap:NM_001109985:exon5:c.C344G:p.S115C	.	het	.	1	170349489	170349489	G	C	het	88.64	20
1	170662530	170662530	A	G	exonic	Olfml2b	.	nonsynonymous SNV	Olfml2b:NM_177068:exon4:c.C718G:p.P240A	.	het	.	1	170662530	170662530	A	G	het	630.64	19
1	170874431	170874431	T	G	exonic	Dusp12	.	nonsynonymous SNV	Dusp12:NM_001356486:exon6:c.G623C:p.G208A,Dusp12:NM_023173:exon6:c.G998C:p.G333A	.	het	.	1	170874431	170874431	T	G	het	277.64	10
1	171214352	171214352	C	T	exonic	Nr1i3	.	nonsynonymous SNV	Nr1i3:NM_001243062:exon2:c.A4T:p.T2S,Nr1i3:NM_001243063:exon2:c.A4T:p.T2S,Nr1i3:NM_009803:exon2:c.A4T:p.T2S	.	het	.	1	171214352	171214352	C	T	het	427.64	18
1	171216755	171216755	G	A	exonic	Nr1i3	.	nonsynonymous SNV	Nr1i3:NM_001243062:exon5:c.T448A:p.Y150N,Nr1i3:NM_001243063:exon5:c.T448A:p.Y150N,Nr1i3:NM_009803:exon5:c.T448A:p.Y150N	.	het	.	1	171216755	171216755	G	A	het	268.64	13
1	171217314	171217314	G	A	exonic	Nr1i3	.	nonsynonymous SNV	Nr1i3:NM_001243062:exon7:c.C725A:p.A242E,Nr1i3:NM_009803:exon7:c.C725A:p.A242E	.	het	.	1	171217314	171217314	G	A	het	599.64	26
1	171217665	171217665	T	C	exonic	Nr1i3	.	nonsynonymous SNV	Nr1i3:NM_001243063:exon8:c.T878C:p.L293P,Nr1i3:NM_009803:exon8:c.T881C:p.L294P	.	het	.	1	171217665	171217665	T	C	het	198.64	21
1	171238838	171238838	T	C	exonic	Ndufs2	.	nonsynonymous SNV	Ndufs2:NM_153064:exon5:c.C574G:p.L192V	.	het	.	1	171238838	171238838	T	C	het	340.64	26
1	171246190	171246190	G	A	exonic	Ndufs2	.	nonsynonymous SNV	Ndufs2:NM_153064:exon2:c.C103T:p.R35W	.	het	.	1	171246190	171246190	G	A	het	789.64	26
1	171258895	171258895	A	G	exonic	Adamts4	.	nonsynonymous SNV	Adamts4:NM_172845:exon9:c.T2219G:p.L740R	.	het	.	1	171258895	171258895	A	G	het	238.64	10
1	171342605	171342605	G	A	exonic	Nit1	.	nonsynonymous SNV	Nit1:NM_001242580:exon7:c.A799T:p.M267L,Nit1:NM_012049:exon7:c.A898T:p.M300L	.	het	.	1	171342605	171342605	G	A	het	139.64	13
1	171342665	171342665	G	A	exonic	Nit1	.	nonsynonymous SNV	Nit1:NM_001242580:exon7:c.C739T:p.R247C,Nit1:NM_012049:exon7:c.C838T:p.R280C	.	het	.	1	171342665	171342665	G	A	het	283.10	10
1	171342665	171342665	G	T	exonic	Nit1	.	nonsynonymous SNV	Nit1:NM_001242580:exon7:c.C739A:p.R247S,Nit1:NM_012049:exon7:c.C838A:p.R280S	.	het	.	1	171342665	171342665	G	T	het	283.10	10
1	171342674	171342674	G	A	exonic	Nit1	.	nonsynonymous SNV	Nit1:NM_001242580:exon7:c.G730T:p.V244L,Nit1:NM_012049:exon7:c.G829T:p.V277L	.	het	.	1	171342674	171342674	G	A	het	184.64	11
1	171342685	171342685	T	C	exonic	Nit1	.	nonsynonymous SNV	Nit1:NM_001242580:exon7:c.C719G:p.P240R,Nit1:NM_012049:exon7:c.C818G:p.P273R	.	het	.	1	171342685	171342685	T	C	het	187.64	10
1	171342694	171342694	C	T	exonic	Nit1	.	nonsynonymous SNV	Nit1:NM_001242580:exon7:c.T710A:p.V237E,Nit1:NM_012049:exon7:c.T809A:p.V270E	.	het	.	1	171342694	171342694	C	T	het	91.64	12
1	171342709	171342709	T	C	exonic	Nit1	.	nonsynonymous SNV	Nit1:NM_001242580:exon7:c.A695G:p.Y232C,Nit1:NM_012049:exon7:c.A794G:p.Y265C	.	het	.	1	171342709	171342709	T	C	het	108.64	13
1	171342722	171342722	T	A	exonic	Nit1	.	nonsynonymous SNV	Nit1:NM_001242580:exon7:c.A682T:p.T228S,Nit1:NM_012049:exon7:c.A781T:p.T261S	.	het	.	1	171342722	171342722	T	A	het	133.64	13
1	171342730	171342730	G	A	exonic	Nit1	.	nonsynonymous SNV	Nit1:NM_001242580:exon7:c.A674T:p.H225L,Nit1:NM_012049:exon7:c.A773T:p.H258L	.	het	.	1	171342730	171342730	G	A	het	157.64	15
1	171342778	171342778	T	A	exonic	Nit1	.	nonsynonymous SNV	Nit1:NM_001242580:exon7:c.C626T:p.A209V,Nit1:NM_012049:exon7:c.C725T:p.A242V	.	het	.	1	171342778	171342778	T	A	het	127.64	15
1	171345737	171345737	C	T	exonic	Pfdn2	.	nonsynonymous SNV	Pfdn2:NM_001360824:exon1:c.G26T:p.G9V,Pfdn2:NM_011070:exon1:c.G26T:p.G9V	.	het	.	1	171345737	171345737	C	T	het	152.64	11
1	171345752	171345752	T	A	exonic	Pfdn2	.	nonsynonymous SNV	Pfdn2:NM_001360824:exon1:c.G41A:p.S14N,Pfdn2:NM_011070:exon1:c.G41A:p.S14N	.	het	.	1	171345752	171345752	T	A	het	20.64	11
1	171356718	171356718	C	T	exonic	Pfdn2	.	nonsynonymous SNV	Pfdn2:NM_001360824:exon3:c.A178T:p.T60S,Pfdn2:NM_001360825:exon3:c.A34T:p.T12S,Pfdn2:NM_011070:exon3:c.A178T:p.T60S	.	het	.	1	171356718	171356718	C	T	het	136.64	12
1	171356728	171356728	C	T	exonic	Pfdn2	.	nonsynonymous SNV	Pfdn2:NM_001360824:exon3:c.A188T:p.E63V,Pfdn2:NM_001360825:exon3:c.A44T:p.E15V,Pfdn2:NM_011070:exon3:c.A188T:p.E63V	.	het	.	1	171356728	171356728	C	T	het	46.64	12
1	171356740	171356740	C	T	exonic	Pfdn2	.	nonsynonymous SNV	Pfdn2:NM_001360824:exon3:c.C200T:p.T67I,Pfdn2:NM_001360825:exon3:c.C56T:p.T19I,Pfdn2:NM_011070:exon3:c.C200T:p.T67I	.	het	.	1	171356740	171356740	C	T	het	260.64	13
1	171357929	171357929	T	C	exonic	Pfdn2	.	nonsynonymous SNV	Pfdn2:NM_001360825:exon4:c.A224C:p.N75T,Pfdn2:NM_011070:exon4:c.A368C:p.N123T	.	het	.	1	171357929	171357929	T	C	het	79.64	16
1	171357930	171357930	A	G	exonic	Pfdn2	.	nonsynonymous SNV	Pfdn2:NM_001360825:exon4:c.C225G:p.N75K,Pfdn2:NM_011070:exon4:c.C369G:p.N123K	.	het	.	1	171357930	171357930	A	G	het	124.64	16
1	171357956	171357956	C	T	exonic	Pfdn2	.	nonsynonymous SNV	Pfdn2:NM_001360825:exon4:c.A251T:p.K84M,Pfdn2:NM_011070:exon4:c.A395T:p.K132M	.	het	.	1	171357956	171357956	C	T	het	444.64	17
1	171357958	171357958	C	T	exonic	Pfdn2	.	nonsynonymous SNV	Pfdn2:NM_001360825:exon4:c.C253T:p.P85S,Pfdn2:NM_011070:exon4:c.C397T:p.P133S	.	het	.	1	171357958	171357958	C	T	het	309.64	17
1	171357964	171357964	G	A	exonic	Pfdn2	.	nonsynonymous SNV	Pfdn2:NM_001360825:exon4:c.G259A:p.A87T,Pfdn2:NM_011070:exon4:c.G403A:p.A135T	.	het	.	1	171357964	171357964	G	A	het	76.64	17
1	171358849	171358849	T	G	exonic	Klhdc9	.	nonsynonymous SNV	Klhdc9:NM_001033039:exon4:c.A1018C:p.S340R	.	het	.	1	171358849	171358849	T	G	het	328.64	23
1	171358855	171358855	G	A	exonic	Klhdc9	.	nonsynonymous SNV	Klhdc9:NM_001033039:exon4:c.A1012T:p.T338S	.	het	.	1	171358855	171358855	G	A	het	325.64	24
1	171358857	171358857	C	T	exonic	Klhdc9	.	nonsynonymous SNV	Klhdc9:NM_001033039:exon4:c.G1010A:p.R337K	.	het	.	1	171358857	171358857	C	T	het	325.64	24
1	171358861	171358861	A	G	exonic	Klhdc9	.	nonsynonymous SNV	Klhdc9:NM_001033039:exon4:c.G1006C:p.G336R	.	het	.	1	171358861	171358861	A	G	het	283.64	23
1	171358879	171358879	C	A	exonic	Klhdc9	.	nonsynonymous SNV	Klhdc9:NM_001033039:exon4:c.G988T:p.G330W	.	het	.	1	171358879	171358879	C	A	het	325.64	24
1	171358884	171358884	T	C	exonic	Klhdc9	.	nonsynonymous SNV	Klhdc9:NM_001033039:exon4:c.T983G:p.L328W	.	het	.	1	171358884	171358884	T	C	het	367.64	25
1	171358890	171358890	G	T	exonic	Klhdc9	.	nonsynonymous SNV	Klhdc9:NM_001033039:exon4:c.T977A:p.L326H	.	het	.	1	171358890	171358890	G	T	het	406.64	27
1	171358936	171358936	G	T	exonic	Klhdc9	.	nonsynonymous SNV	Klhdc9:NM_001033039:exon4:c.G931A:p.G311R	.	het	.	1	171358936	171358936	G	T	het	313.64	28
1	171358959	171358959	C	T	exonic	Klhdc9	.	nonsynonymous SNV	Klhdc9:NM_001033039:exon4:c.T908A:p.F303Y	.	het	.	1	171358959	171358959	C	T	het	532.64	34
1	171358965	171358965	A	G	exonic	Klhdc9	.	nonsynonymous SNV	Klhdc9:NM_001033039:exon4:c.T902C:p.L301P	.	het	.	1	171358965	171358965	A	G	het	697.64	35
1	171359460	171359460	G	A	exonic	Klhdc9	.	nonsynonymous SNV	Klhdc9:NM_001033039:exon3:c.A881T:p.D294V	.	het	.	1	171359460	171359460	G	A	het	436.64	17
1	171359498	171359498	0	G	exonic	Klhdc9	.	nonsynonymous SNV	Klhdc9:NM_001033039:exon3:c.A843C:p.R281S	.	het	.	1	171359498	171359498	-	G	het	476.60	17
1	171359517	171359517	G	A	exonic	Klhdc9	.	nonsynonymous SNV	Klhdc9:NM_001033039:exon3:c.G824T:p.G275V	.	het	.	1	171359517	171359517	G	A	het	298.64	18
1	171359523	171359523	C	T	exonic	Klhdc9	.	nonsynonymous SNV	Klhdc9:NM_001033039:exon3:c.T818A:p.L273Q	.	het	.	1	171359523	171359523	C	T	het	298.64	18
1	171360288	171360288	G	T	exonic	Klhdc9	.	nonsynonymous SNV	Klhdc9:NM_001033039:exon1:c.G374A:p.G125D	.	het	.	1	171360288	171360288	G	T	het	138.64	10
1	171360315	171360315	A	C	exonic	Klhdc9	.	nonsynonymous SNV	Klhdc9:NM_001033039:exon1:c.T347G:p.V116G	.	het	.	1	171360315	171360315	A	C	het	174.64	10
1	171360316	171360316	C	T	exonic	Klhdc9	.	nonsynonymous SNV	Klhdc9:NM_001033039:exon1:c.G346A:p.V116M	.	het	.	1	171360316	171360316	C	T	het	94.64	11
1	171360322	171360322	A	C	exonic	Klhdc9	.	nonsynonymous SNV	Klhdc9:NM_001033039:exon1:c.A340G:p.R114G	.	het	.	1	171360322	171360322	A	C	het	94.64	11
1	171360339	171360339	C	T	exonic	Klhdc9	.	nonsynonymous SNV	Klhdc9:NM_001033039:exon1:c.C323A:p.A108D	.	het	.	1	171360339	171360339	C	T	het	91.64	12
1	171360343	171360343	A	G	exonic	Klhdc9	.	nonsynonymous SNV	Klhdc9:NM_001033039:exon1:c.G319C:p.V107L	.	het	.	1	171360343	171360343	A	G	het	155.64	11
1	171360358	171360358	G	A	exonic	Klhdc9	.	nonsynonymous SNV	Klhdc9:NM_001033039:exon1:c.C304T:p.R102C	.	hom	.	1	171360358	171360358	G	A	hom	481.06	11
1	171360365	171360365	C	T	exonic	Klhdc9	.	nonsynonymous SNV	Klhdc9:NM_001033039:exon1:c.C297A:p.D99E	.	het	.	1	171360365	171360365	C	T	het	94.64	11
1	171360375	171360375	C	T	exonic	Klhdc9	.	nonsynonymous SNV	Klhdc9:NM_001033039:exon1:c.G287A:p.G96D	.	het	.	1	171360375	171360375	C	T	het	91.64	12
1	171360376	171360376	G	A	exonic	Klhdc9	.	nonsynonymous SNV	Klhdc9:NM_001033039:exon1:c.G286T:p.G96C	.	het	.	1	171360376	171360376	G	A	het	91.64	12
1	171360379	171360379	A	G	exonic	Klhdc9	.	nonsynonymous SNV	Klhdc9:NM_001033039:exon1:c.G283C:p.V95L	.	het	.	1	171360379	171360379	A	G	het	94.64	11
1	171360382	171360382	C	T	exonic	Klhdc9	.	nonsynonymous SNV	Klhdc9:NM_001033039:exon1:c.G280A:p.V94M	.	het	.	1	171360382	171360382	C	T	het	52.64	10
1	171360387	171360387	T	C	exonic	Klhdc9	.	nonsynonymous SNV	Klhdc9:NM_001033039:exon1:c.T275G:p.L92R	.	het	.	1	171360387	171360387	T	C	het	97.64	10
1	171360514	171360514	A	T	exonic	Klhdc9	.	nonsynonymous SNV	Klhdc9:NM_001033039:exon1:c.G148A:p.G50S	.	het	.	1	171360514	171360514	A	T	het	40.64	14
1	171360534	171360534	C	T	exonic	Klhdc9	.	nonsynonymous SNV	Klhdc9:NM_001033039:exon1:c.T128A:p.V43E	.	het	.	1	171360534	171360534	C	T	het	88.64	13
1	171382483	171382483	T	A	exonic	Nectin4	.	nonsynonymous SNV	Nectin4:NM_001122680:exon3:c.C542A:p.T181N,Nectin4:NM_027893:exon3:c.C542A:p.T181N	.	het	.	1	171382483	171382483	T	A	het	257.64	10
1	171382500	171382500	T	C	exonic	Nectin4	.	nonsynonymous SNV	Nectin4:NM_001122680:exon3:c.A559C:p.K187Q,Nectin4:NM_027893:exon3:c.A559C:p.K187Q	.	het	.	1	171382500	171382500	T	C	het	367.65	10
1	171382507	171382507	G	T	exonic	Nectin4	.	nonsynonymous SNV	Nectin4:NM_001122680:exon3:c.C566T:p.T189I,Nectin4:NM_027893:exon3:c.C566T:p.T189I	.	het	.	1	171382507	171382507	G	T	het	367.65	10
1	171382543	171382543	C	T	exonic	Nectin4	.	nonsynonymous SNV	Nectin4:NM_001122680:exon3:c.C602T:p.A201V,Nectin4:NM_027893:exon3:c.C602T:p.A201V	.	het	.	1	171382543	171382543	C	T	het	87.64	12
1	171382576	171382576	C	A	exonic	Nectin4	.	nonsynonymous SNV	Nectin4:NM_001122680:exon3:c.G635A:p.S212N,Nectin4:NM_027893:exon3:c.G635A:p.S212N	.	het	.	1	171382576	171382576	C	A	het	330.10	11
1	171382644	171382644	A	T	exonic	Nectin4	.	nonsynonymous SNV	Nectin4:NM_001122680:exon3:c.A703T:p.I235F,Nectin4:NM_027893:exon3:c.A703T:p.I235F	.	het	.	1	171382644	171382644	A	T	het	97.64	10
1	171384710	171384710	T	G	exonic	Nectin4	.	nonsynonymous SNV	Nectin4:NM_001122680:exon5:c.T875G:p.V292G,Nectin4:NM_027893:exon5:c.T875G:p.V292G	.	het	.	1	171384710	171384710	T	G	het	510.85	14
1	171384734	171384734	C	T	exonic	Nectin4	.	nonsynonymous SNV	Nectin4:NM_001122680:exon5:c.G899T:p.G300V,Nectin4:NM_027893:exon5:c.G899T:p.G300V	.	het	.	1	171384734	171384734	C	T	het	493.75	13
1	171384739	171384739	A	G	exonic	Nectin4	.	nonsynonymous SNV	Nectin4:NM_001122680:exon5:c.C904G:p.P302A,Nectin4:NM_027893:exon5:c.C904G:p.P302A	.	het	.	1	171384739	171384739	A	G	het	493.75	13
1	171384764	171384764	T	C	exonic	Nectin4	.	nonsynonymous SNV	Nectin4:NM_001122680:exon5:c.G929C:p.G310A,Nectin4:NM_027893:exon5:c.G929C:p.G310A	.	het	.	1	171384764	171384764	T	C	het	445.64	14
1	171384781	171384781	A	T	exonic	Nectin4	.	nonsynonymous SNV	Nectin4:NM_001122680:exon5:c.G946T:p.V316F,Nectin4:NM_027893:exon5:c.G946T:p.V316F	.	het	.	1	171384781	171384781	A	T	het	364.64	11
1	171384815	171384815	T	C	exonic	Nectin4	.	nonsynonymous SNV	Nectin4:NM_001122680:exon5:c.T980C:p.V327A,Nectin4:NM_027893:exon5:c.T980C:p.V327A	.	het	.	1	171384815	171384815	T	C	het	361.64	12
1	171386582	171386582	G	A	exonic	Nectin4	.	nonsynonymous SNV	Nectin4:NM_001122680:exon8:c.G1229A:p.S410N,Nectin4:NM_027893:exon9:c.G1304A:p.S435N	.	het	.	1	171386582	171386582	G	A	het	334.64	21
1	171386631	171386631	0	T	exonic	Nectin4	.	nonsynonymous SNV	Nectin4:NM_001122680:exon8:c.G1278T:p.E426D,Nectin4:NM_027893:exon9:c.G1353T:p.E451D	.	het	.	1	171386631	171386631	-	T	het	133.60	13
1	171386725	171386725	A	G	exonic	Nectin4	.	nonsynonymous SNV	Nectin4:NM_001122680:exon8:c.T1372G:p.F458V,Nectin4:NM_027893:exon9:c.T1447G:p.F483V	.	het	.	1	171386725	171386725	A	G	het	507.64	34
1	171389322	171389322	G	T	exonic	Arhgap30	.	nonsynonymous SNV	Arhgap30:NM_001005508:exon1:c.G56T:p.G19V	.	het	.	1	171389322	171389322	G	T	het	271.64	12
1	171389328	171389328	A	C	exonic	Arhgap30	.	nonsynonymous SNV	Arhgap30:NM_001005508:exon1:c.A62C:p.D21A	.	het	.	1	171389328	171389328	A	C	het	271.64	12
1	171389331	171389331	T	A	exonic	Arhgap30	.	nonsynonymous SNV	Arhgap30:NM_001005508:exon1:c.T65A:p.L22Q	.	het	.	1	171389331	171389331	T	A	het	271.64	12
1	171407888	171407888	A	G	exonic	Arhgap30	.	nonsynonymous SNV	Arhgap30:NM_001005508:exon12:c.T1829G:p.L610R	.	het	.	1	171407888	171407888	A	G	het	180.64	15
1	171419079	171419079	0	A	exonic	Tstd1	.	nonsynonymous SNV	Tstd1:NM_001164525:exon1:c.G8A:p.R3Q	.	het	.	1	171419079	171419079	-	A	het	305.60	14
1	171636314	171636314	A	G	exonic	Slamf7	.	nonsynonymous SNV	Slamf7:NM_001347184:exon5:c.G824C:p.S275T,Slamf7:NM_144539:exon7:c.G928C:p.V310L	.	het	.	1	171636314	171636314	A	G	het	678.64	23
1	171873330	171873330	A	G	exonic	Cd84	.	nonsynonymous SNV	Cd84:NM_001289470:exon5:c.T657G:p.H219Q,Cd84:NM_013489:exon5:c.T657G:p.H219Q	.	het	.	1	171873330	171873330	A	G	het	184.64	11
1	171884611	171884611	T	C	exonic	Cd84	.	nonsynonymous SNV	Cd84:NM_001289470:exon6:c.T790C:p.Y264H,Cd84:NM_013489:exon6:c.T793C:p.Y265H	.	het	.	1	171884611	171884611	T	C	het	316.64	19
1	172067506	172067506	A	T	exonic	Ncstn	.	nonsynonymous SNV	Ncstn:NM_021607:exon16:c.C1829A:p.S610Y	.	het	.	1	172067506	172067506	A	T	het	43.64	10
1	172072150	172072150	G	C	exonic	Ncstn	.	nonsynonymous SNV	Ncstn:NM_021607:exon8:c.C964G:p.R322G	.	het	.	1	172072150	172072150	G	C	het	39.64	13
1	172072256	172072256	T	C	exonic	Ncstn	.	nonsynonymous SNV	Ncstn:NM_021607:exon8:c.T858G:p.F286L	.	het	.	1	172072256	172072256	T	C	het	72.64	14
1	172072807	172072807	G	T	exonic	Ncstn	.	nonsynonymous SNV	Ncstn:NM_021607:exon6:c.T700A:p.F234I	.	het	.	1	172072807	172072807	G	T	het	82.64	11
1	172072824	172072824	G	A	exonic	Ncstn	.	nonsynonymous SNV	Ncstn:NM_021607:exon6:c.C683T:p.T228I	.	het	.	1	172072824	172072824	G	A	het	76.64	13
1	172106128	172106128	G	A	exonic	Copa	.	nonsynonymous SNV	Copa:NM_009938:exon13:c.T1155A:p.N385K	.	het	.	1	172106128	172106128	G	A	het	92.64	21
1	172111936	172111936	A	T	exonic	Copa	.	nonsynonymous SNV	Copa:NM_009938:exon18:c.G1739T:p.C580F	.	het	.	1	172111936	172111936	A	T	het	163.64	18
1	172111942	172111942	A	G	exonic	Copa	.	nonsynonymous SNV	Copa:NM_009938:exon18:c.A1745G:p.D582G	.	het	.	1	172111942	172111942	A	G	het	166.64	17
1	172113211	172113211	C	T	exonic	Copa	.	nonsynonymous SNV	Copa:NM_009938:exon20:c.G2163T:p.K721N	.	het	.	1	172113211	172113211	C	T	het	25.64	16
1	172115074	172115074	C	T	exonic	Copa	.	nonsynonymous SNV	Copa:NM_009938:exon23:c.A2404T:p.M802L	.	het	.	1	172115074	172115074	C	T	het	88.64	16
1	172117295	172117295	A	G	exonic	Copa	.	nonsynonymous SNV	Copa:NM_009938:exon25:c.T2675G:p.L892R	.	het	.	1	172117295	172117295	A	G	het	119.64	12
1	172118085	172118085	C	G	exonic	Copa	.	nonsynonymous SNV	Copa:NM_009938:exon26:c.C2747G:p.P916R	.	het	.	1	172118085	172118085	C	G	het	22.64	17
1	172121419	172121419	A	G	exonic	Copa	.	nonsynonymous SNV	Copa:NM_009938:exon32:c.A3610G:p.T1204A	.	het	.	1	172121419	172121419	A	G	het	139.64	11
1	172128720	172128720	G	A	exonic	Pex19	.	nonsynonymous SNV	Pex19:NM_001356513:exon2:c.G160A:p.A54T,Pex19:NM_001356514:exon2:c.G160A:p.A54T,Pex19:NM_023041:exon2:c.G160A:p.A54T	.	het	.	1	172128720	172128720	G	A	het	175.64	14
1	172234518	172234518	A	G	exonic	Atp1a4	.	nonsynonymous SNV	Atp1a4:NM_013734:exon15:c.A2039C:p.K680T	.	het	.	1	172234518	172234518	A	G	het	290.64	14
1	172239758	172239758	G	T	exonic	Atp1a4	.	nonsynonymous SNV	Atp1a4:NM_013734:exon13:c.T1806A:p.D602E	.	het	.	1	172239758	172239758	G	T	het	52.64	10
1	172316262	172316262	A	G	exonic	Igsf8	.	nonsynonymous SNV	Igsf8:NM_080419:exon2:c.A170G:p.Q57R	.	het	.	1	172316262	172316262	A	G	het	150.64	18
1	172316425	172316425	T	C	exonic	Igsf8	.	nonsynonymous SNV	Igsf8:NM_080419:exon2:c.G333C:p.K111N	.	het	.	1	172316425	172316425	T	C	het	250.64	19
1	172317364	172317364	C	T	exonic	Igsf8	.	nonsynonymous SNV	Igsf8:NM_080419:exon3:c.A446T:p.D149V	.	het	.	1	172317364	172317364	C	T	het	182.64	24
1	172317388	172317388	A	G	exonic	Igsf8	.	nonsynonymous SNV	Igsf8:NM_080419:exon3:c.C470G:p.P157R	.	het	.	1	172317388	172317388	A	G	het	188.64	21
1	172317429	172317429	C	T	exonic	Igsf8	.	nonsynonymous SNV	Igsf8:NM_080419:exon3:c.C511T:p.R171C	.	het	.	1	172317429	172317429	C	T	het	269.64	21
1	172317435	172317435	C	T	exonic	Igsf8	.	nonsynonymous SNV	Igsf8:NM_080419:exon3:c.A517T:p.T173S	.	het	.	1	172317435	172317435	C	T	het	247.64	20
1	172317504	172317504	G	A	exonic	Igsf8	.	nonsynonymous SNV	Igsf8:NM_080419:exon3:c.C586A:p.L196M	.	het	.	1	172317504	172317504	G	A	het	113.64	23
1	172317792	172317792	T	C	exonic	Igsf8	.	nonsynonymous SNV	Igsf8:NM_080419:exon3:c.G874C:p.A292P	.	het	.	1	172317792	172317792	T	C	het	104.64	20
1	172318189	172318189	G	A	exonic	Igsf8	.	nonsynonymous SNV	Igsf8:NM_080419:exon4:c.C1051A:p.P351T	.	het	.	1	172318189	172318189	G	A	het	138.64	22
1	172318408	172318408	A	G	exonic	Igsf8	.	nonsynonymous SNV	Igsf8:NM_080419:exon4:c.C1270G:p.R424G	.	het	.	1	172318408	172318408	A	G	het	40.64	14
1	172322888	172322888	T	C	exonic	Kcnj9	.	nonsynonymous SNV	Kcnj9:NM_001360808:exon4:c.C1157G:p.P386R,Kcnj9:NM_008429:exon4:c.C1157G:p.P386R	.	het	.	1	172322888	172322888	T	C	het	247.64	35
1	172325733	172325733	T	C	exonic	Kcnj9	.	nonsynonymous SNV	Kcnj9:NM_001360808:exon3:c.A823G:p.I275V,Kcnj9:NM_008429:exon3:c.A823G:p.I275V	.	het	.	1	172325733	172325733	T	C	het	103.64	20
1	172325804	172325804	A	G	exonic	Kcnj9	.	nonsynonymous SNV	Kcnj9:NM_001360808:exon3:c.T752C:p.I251T,Kcnj9:NM_008429:exon3:c.T752C:p.I251T	.	het	.	1	172325804	172325804	A	G	het	379.64	33
1	172325967	172325967	T	C	exonic	Kcnj9	.	nonsynonymous SNV	Kcnj9:NM_001360808:exon3:c.T589G:p.S197A,Kcnj9:NM_008429:exon3:c.T589G:p.S197A	.	het	.	1	172325967	172325967	T	C	het	202.64	34
1	172326267	172326267	0	G	exonic	Kcnj9	.	nonsynonymous SNV	Kcnj9:NM_001360808:exon3:c.T289C:p.W97R,Kcnj9:NM_008429:exon3:c.T289C:p.W97R	.	het	.	1	172326267	172326267	-	G	het	264.60	17
1	172368957	172368957	C	G	exonic	Kcnj10	.	nonsynonymous SNV	Kcnj10:NM_001039484:exon2:c.A37G:p.T13A	.	het	.	1	172368957	172368957	C	G	het	129.64	21
1	172369132	172369132	T	C	exonic	Kcnj10	.	nonsynonymous SNV	Kcnj10:NM_001039484:exon2:c.T212C:p.F71S	.	het	.	1	172369132	172369132	T	C	het	170.64	12
1	172376879	172376879	A	G	exonic	Pigm	.	nonsynonymous SNV	Pigm:NM_026234:exon1:c.T181G:p.F61V	.	het	.	1	172376879	172376879	A	G	het	66.64	19
1	172505167	172505167	A	G	exonic	Tagln2	.	nonsynonymous SNV	Tagln2:NM_178598:exon2:c.C20G:p.S7C	.	het	.	1	172505167	172505167	A	G	het	323.64	21
1	172505200	172505200	A	C	exonic	Tagln2	.	nonsynonymous SNV	Tagln2:NM_178598:exon2:c.T53C:p.I18T	.	het	.	1	172505200	172505200	A	C	het	133.64	13
1	172505212	172505212	T	C	exonic	Tagln2	.	nonsynonymous SNV	Tagln2:NM_178598:exon2:c.A65C:p.Y22S	.	het	.	1	172505212	172505212	T	C	het	128.64	12
1	172505301	172505301	T	G	exonic	Tagln2	.	nonsynonymous SNV	Tagln2:NM_178598:exon2:c.T154G:p.F52V	.	het	.	1	172505301	172505301	T	G	het	229.64	11
1	172505304	172505304	G	A	exonic	Tagln2	.	nonsynonymous SNV	Tagln2:NM_178598:exon2:c.C157A:p.Q53K	.	het	.	1	172505304	172505304	G	A	het	313.64	13
1	175728879	175728879	A	C	exonic	Wdr64	.	nonsynonymous SNV	Wdr64:NM_029453:exon7:c.G721C:p.G241R	.	het	.	1	175728879	175728879	A	C	het	28.64	18
1	175728892	175728892	T	C	exonic	Wdr64	.	nonsynonymous SNV	Wdr64:NM_029453:exon7:c.G734C:p.G245A	.	het	.	1	175728892	175728892	T	C	het	30.64	18
1	178869425	178869425	G	A	exonic	Kif26b	.	nonsynonymous SNV	Kif26b:NM_001161665:exon7:c.G1637A:p.G546D	.	het	.	1	178869425	178869425	G	A	het	172.64	15
1	178869433	178869433	A	G	exonic	Kif26b	.	nonsynonymous SNV	Kif26b:NM_001161665:exon7:c.A1645G:p.K549E	.	het	.	1	178869433	178869433	A	G	het	166.64	17
1	178870645	178870645	T	C	exonic	Kif26b	.	nonsynonymous SNV	Kif26b:NM_001161665:exon8:c.G1700C:p.G567A	.	het	.	1	178870645	178870645	T	C	het	142.64	10
1	178870647	178870647	A	G	exonic	Kif26b	.	nonsynonymous SNV	Kif26b:NM_001161665:exon8:c.A1702G:p.I568V	.	het	.	1	178870647	178870647	A	G	het	142.64	10
1	178870806	178870806	C	T	exonic	Kif26b	.	nonsynonymous SNV	Kif26b:NM_001161665:exon8:c.G1861T:p.D621Y	.	het	.	1	178870806	178870806	C	T	het	64.64	14
1	178870837	178870837	C	T	exonic	Kif26b	.	nonsynonymous SNV	Kif26b:NM_001161665:exon8:c.A1892T:p.E631V	.	het	.	1	178870837	178870837	C	T	het	107.64	16
1	179544948	179544948	G	A	exonic	Tfb2m	.	nonsynonymous SNV	Tfb2m:NM_001331054:exon2:c.G349T:p.A117S,Tfb2m:NM_008249:exon2:c.G349T:p.A117S	.	het	.	1	179544948	179544948	G	A	het	253.64	18
1	179787060	179787060	T	G	exonic	Ahctf1	.	nonsynonymous SNV	Ahctf1:NM_026375:exon9:c.A1158C:p.Q386H	.	het	.	1	179787060	179787060	T	G	het	27.64	15
1	179999401	179999401	T	C	exonic	Cdc42bpa	.	nonsynonymous SNV	Cdc42bpa:NM_001033285:exon2:c.A218C:p.H73P,Cdc42bpa:NM_001346804:exon2:c.A218C:p.H73P,Cdc42bpa:NM_001346805:exon2:c.A218C:p.H73P,Cdc42bpa:NM_001359541:exon2:c.A218C:p.H73P,Cdc42bpa:NM_001359542:exon2:c.A218C:p.H73P,Cdc42bpa:NM_001359543:exon2:c.A218C:p.H73P,Cdc42bpa:NM_001359544:exon2:c.A218C:p.H73P,Cdc42bpa:NM_001359545:exon2:c.A218C:p.H73P,Cdc42bpa:NM_001359546:exon3:c.A11C:p.H4P	.	het	.	1	179999401	179999401	T	C	het	92.64	21
1	180067159	180067159	G	A	exonic	Cdc42bpa	.	nonsynonymous SNV	Cdc42bpa:NM_001033285:exon8:c.T903A:p.F301L,Cdc42bpa:NM_001346804:exon8:c.T903A:p.F301L,Cdc42bpa:NM_001346805:exon8:c.T903A:p.F301L,Cdc42bpa:NM_001359541:exon8:c.T903A:p.F301L,Cdc42bpa:NM_001359542:exon8:c.T903A:p.F301L,Cdc42bpa:NM_001359543:exon8:c.T903A:p.F301L,Cdc42bpa:NM_001359544:exon8:c.T903A:p.F301L,Cdc42bpa:NM_001359545:exon8:c.T903A:p.F301L,Cdc42bpa:NM_001359546:exon9:c.T696A:p.F232L,Cdc…	.	het	.	1	180067159	180067159	G	A	het	343.64	18
1	180069329	180069329	G	A	exonic	Cdc42bpa	.	nonsynonymous SNV	Cdc42bpa:NM_001033285:exon9:c.T1176A:p.F392L,Cdc42bpa:NM_001346804:exon9:c.T1176A:p.F392L,Cdc42bpa:NM_001346805:exon9:c.T1176A:p.F392L,Cdc42bpa:NM_001359541:exon9:c.T1176A:p.F392L,Cdc42bpa:NM_001359542:exon9:c.T1176A:p.F392L,Cdc42bpa:NM_001359543:exon9:c.T1176A:p.F392L,Cdc42bpa:NM_001359544:exon9:c.T1176A:p.F392L,Cdc42bpa:NM_001359545:exon9:c.T1176A:p.F392L,Cdc42bpa:NM_001359546:exon10:c.T969A:p.…	.	het	.	1	180069329	180069329	G	A	het	169.64	16
1	180114044	180114044	T	C	exonic	Cdc42bpa	.	nonsynonymous SNV	Cdc42bpa:NM_001346805:exon19:c.G2514C:p.K838N,Cdc42bpa:NM_001359544:exon19:c.G2514C:p.K838N,Cdc42bpa:NM_001033285:exon20:c.G2757C:p.K919N,Cdc42bpa:NM_001346804:exon20:c.G2757C:p.K919N,Cdc42bpa:NM_001359541:exon20:c.G2757C:p.K919N,Cdc42bpa:NM_001359542:exon20:c.G2757C:p.K919N,Cdc42bpa:NM_001359543:exon20:c.G2757C:p.K919N,Cdc42bpa:NM_001359545:exon20:c.G2757C:p.K919N,Cdc42bpa:NM_001359546:exon21:c.…	.	het	.	1	180114044	180114044	T	C	het	69.64	21
1	180413997	180413997	T	C	exonic	Itpkb	.	nonsynonymous SNV	Itpkb:NM_001081175:exon4:c.T2231C:p.V744A	.	het	.	1	180413997	180413997	T	C	het	142.64	21
1	181930702	181930702	T	A	exonic	Enah	.	nonsynonymous SNV	Enah:NM_001083120:exon4:c.A410T:p.Q137L,Enah:NM_001083121:exon4:c.A410T:p.Q137L,Enah:NM_008680:exon5:c.A422T:p.Q141L,Enah:NM_010135:exon5:c.A467T:p.Q156L	.	het	.	1	181930702	181930702	T	A	het	24.64	13
1	185249944	185249944	G	A	exonic	Rab3gap2	.	nonsynonymous SNV	Rab3gap2:NM_001163754:exon13:c.G1192A:p.A398T	.	het	.	1	185249944	185249944	G	A	het	84.64	10
1	185252355	185252355	T	G	exonic	Rab3gap2	.	nonsynonymous SNV	Rab3gap2:NM_001163754:exon17:c.T1751G:p.I584S	.	het	.	1	185252355	185252355	T	G	het	200.64	15
1	189653211	189653211	T	C	exonic	Cenpf	.	nonsynonymous SNV	Cenpf:NM_001081363:exon13:c.C6871G:p.Q2291E	.	het	.	1	189653211	189653211	T	C	het	281.64	32
1	189654254	189654254	G	A	exonic	Cenpf	.	nonsynonymous SNV	Cenpf:NM_001081363:exon13:c.A5828T:p.Q1943L	.	het	.	1	189654254	189654254	G	A	het	183.64	33
1	191039593	191039593	A	G	exonic	Spata45	.	nonsynonymous SNV	Spata45:NM_029336:exon2:c.T11G:p.M4R,Spata45:NM_001379428:exon3:c.T11G:p.M4R	.	het	.	1	191039593	191039593	A	G	het	119.64	15
1	191582512	191582512	C	T	exonic	Ints7	.	nonsynonymous SNV	Ints7:NM_178632:exon2:c.G208T:p.D70Y	.	het	.	1	191582512	191582512	C	T	het	236.64	14
1	191596296	191596296	A	G	exonic	Ints7	.	nonsynonymous SNV	Ints7:NM_001306204:exon4:c.C308G:p.S103C,Ints7:NM_001306203:exon5:c.C308G:p.S103C,Ints7:NM_178632:exon6:c.C680G:p.S227C	.	het	.	1	191596296	191596296	A	G	het	119.64	12
1	191608003	191608003	T	C	exonic	Ints7	.	nonsynonymous SNV	Ints7:NM_001306204:exon9:c.G1042C:p.V348L,Ints7:NM_001306203:exon10:c.G1042C:p.V348L,Ints7:NM_178632:exon11:c.G1414C:p.V472L	.	het	.	1	191608003	191608003	T	C	het	84.64	13
1	191608043	191608043	C	T	exonic	Ints7	.	nonsynonymous SNV	Ints7:NM_001306204:exon9:c.A1082T:p.K361M,Ints7:NM_001306203:exon10:c.A1082T:p.K361M,Ints7:NM_178632:exon11:c.A1454T:p.K485M	.	het	.	1	191608043	191608043	C	T	het	87.64	12
1	191611994	191611994	A	C	exonic	Ints7	.	nonsynonymous SNV	Ints7:NM_001306204:exon11:c.G1373C:p.S458T,Ints7:NM_001306203:exon12:c.G1373C:p.S458T,Ints7:NM_178632:exon13:c.G1745C:p.S582T	.	het	.	1	191611994	191611994	A	C	het	196.64	12
1	191612031	191612031	C	T	exonic	Ints7	.	nonsynonymous SNV	Ints7:NM_001306204:exon11:c.G1410T:p.L470F,Ints7:NM_001306203:exon12:c.G1410T:p.L470F,Ints7:NM_178632:exon13:c.G1782T:p.L594F	.	het	.	1	191612031	191612031	C	T	het	150.64	14
1	191821662	191821662	C	T	exonic	Nek2	.	nonsynonymous SNV	Nek2:NM_010892:exon1:c.A17T:p.E6V	.	het	.	1	191821662	191821662	C	T	het	75.64	13
2	17388772	17388772	G	T	exonic	Nebl	.	nonsynonymous SNV	Nebl:NM_001362722:exon18:c.G1684A:p.E562K	.	het	.	2	17388772	17388772	G	T	het	34.64	12
2	22634938	22634938	C	G	exonic	Gad2	.	nonsynonymous SNV	Gad2:NM_008078:exon7:c.A733G:p.I245V	.	het	.	2	22634938	22634938	C	G	het	2294.64	74
2	22634988	22634988	C	T	exonic	Gad2	.	nonsynonymous SNV	Gad2:NM_008078:exon7:c.A783T:p.E261D	.	het	.	2	22634988	22634988	C	T	het	1066.64	43
2	22634989	22634989	G	C	exonic	Gad2	.	nonsynonymous SNV	Gad2:NM_008078:exon7:c.G784C:p.V262L	.	het	.	2	22634989	22634989	G	C	het	1066.64	43
2	22635006	22635006	A	C	exonic	Gad2	.	nonsynonymous SNV	Gad2:NM_008078:exon7:c.G801C:p.M267I	.	het	.	2	22635006	22635006	A	C	het	412.64	25
2	24974532	24974532	G	A	exonic	Mrpl41	.	nonsynonymous SNV	Mrpl41:NM_001031808:exon2:c.A127T:p.T43S	.	het	.	2	24974532	24974532	G	A	het	112.64	13
2	24974607	24974607	A	G	exonic	Mrpl41	.	nonsynonymous SNV	Mrpl41:NM_001031808:exon2:c.A52C:p.M18L	.	het	.	2	24974607	24974607	A	G	het	178.64	13
2	24974612	24974612	A	G	exonic	Mrpl41	.	nonsynonymous SNV	Mrpl41:NM_001031808:exon2:c.A47C:p.D16A	.	het	.	2	24974612	24974612	A	G	het	178.64	13
2	24974619	24974619	G	T	exonic	Mrpl41	.	nonsynonymous SNV	Mrpl41:NM_001031808:exon2:c.G40A:p.G14R	.	het	.	2	24974619	24974619	G	T	het	200.64	14
2	25303732	25303732	A	G	exonic	Grin1	.	nonsynonymous SNV	Grin1:NM_001177657:exon8:c.A1191C:p.R397S,Grin1:NM_001372561:exon8:c.A1191C:p.R397S,Grin1:NM_001372562:exon8:c.A1191C:p.R397S,Grin1:NM_008169:exon8:c.A1191C:p.R397S,Grin1:NM_001177656:exon9:c.A1254C:p.R418S,Grin1:NM_001372558:exon9:c.A1254C:p.R418S,Grin1:NM_001372559:exon9:c.A1254C:p.R418S,Grin1:NM_001372560:exon9:c.A1254C:p.R418S	.	het	.	2	25303732	25303732	A	G	het	52.64	10
2	25303749	25303749	C	T	exonic	Grin1	.	nonsynonymous SNV	Grin1:NM_001177657:exon8:c.T1174A:p.Y392N,Grin1:NM_001372561:exon8:c.T1174A:p.Y392N,Grin1:NM_001372562:exon8:c.T1174A:p.Y392N,Grin1:NM_008169:exon8:c.T1174A:p.Y392N,Grin1:NM_001177656:exon9:c.T1237A:p.Y413N,Grin1:NM_001372558:exon9:c.T1237A:p.Y413N,Grin1:NM_001372559:exon9:c.T1237A:p.Y413N,Grin1:NM_001372560:exon9:c.T1237A:p.Y413N	.	het	.	2	25303749	25303749	C	T	het	52.64	10
2	26945921	26945921	G	A	exonic	Stkld1	.	nonsynonymous SNV	Stkld1:NM_001379463:exon9:c.C791A:p.A264E,Stkld1:NM_001379464:exon9:c.C791A:p.A264E,Stkld1:NM_198628:exon9:c.C767A:p.A256E	.	het	.	2	26945921	26945921	G	A	het	75.64	13
2	26950064	26950064	G	C	exonic	Stkld1	.	nonsynonymous SNV	Stkld1:NM_001379463:exon13:c.G1169C:p.S390T,Stkld1:NM_001379464:exon13:c.G1169C:p.S390T,Stkld1:NM_198628:exon13:c.G1145C:p.S382T	.	het	.	2	26950064	26950064	G	C	het	66.64	16
2	26984154	26984154	C	G	exonic	Adamts13	.	nonsynonymous SNV	Adamts13:NM_001001322:exon11:c.C1314G:p.C438W,Adamts13:NM_001290463:exon11:c.C1314G:p.C438W,Adamts13:NM_001290464:exon11:c.C1314G:p.C438W,Adamts13:NM_001290465:exon11:c.C1314G:p.C438W	.	het	.	2	26984154	26984154	C	G	het	71.64	13
2	26988374	26988374	T	C	exonic	Adamts13	.	nonsynonymous SNV	Adamts13:NM_001001322:exon15:c.A1756C:p.T586P,Adamts13:NM_001290463:exon15:c.A1756C:p.T586P,Adamts13:NM_001290464:exon15:c.A1756C:p.T586P,Adamts13:NM_001290465:exon15:c.A1756C:p.T586P	.	het	.	2	26988374	26988374	T	C	het	284.64	23
2	26988399	26988399	A	C	exonic	Adamts13	.	nonsynonymous SNV	Adamts13:NM_001001322:exon15:c.G1781C:p.R594T,Adamts13:NM_001290463:exon15:c.G1781C:p.R594T,Adamts13:NM_001290464:exon15:c.G1781C:p.R594T,Adamts13:NM_001290465:exon15:c.G1781C:p.R594T	.	het	.	2	26988399	26988399	A	C	het	221.64	19
2	26989291	26989291	A	G	exonic	Adamts13	.	nonsynonymous SNV	Adamts13:NM_001001322:exon16:c.A1855G:p.N619D,Adamts13:NM_001290463:exon16:c.A1855G:p.N619D,Adamts13:NM_001290464:exon16:c.A1855G:p.N619D	.	het	.	2	26989291	26989291	A	G	het	152.64	16
2	26989373	26989373	T	C	exonic	Adamts13	.	nonsynonymous SNV	Adamts13:NM_001001322:exon16:c.A1937C:p.E646A,Adamts13:NM_001290463:exon16:c.A1937C:p.E646A,Adamts13:NM_001290464:exon16:c.A1937C:p.E646A	.	het	.	2	26989373	26989373	T	C	het	133.64	13
2	26990353	26990353	A	G	exonic	Adamts13	.	nonsynonymous SNV	Adamts13:NM_001290465:exon16:c.C2000G:p.P667R,Adamts13:NM_001001322:exon17:c.C2027G:p.P676R,Adamts13:NM_001290463:exon17:c.C2027G:p.P676R,Adamts13:NM_001290464:exon17:c.C2027G:p.P676R	.	het	.	2	26990353	26990353	A	G	het	93.64	10
2	26990601	26990601	C	T	exonic	Adamts13	.	nonsynonymous SNV	Adamts13:NM_001290465:exon17:c.G2168T:p.S723I,Adamts13:NM_001001322:exon18:c.G2195T:p.S732I,Adamts13:NM_001290463:exon18:c.G2195T:p.S732I,Adamts13:NM_001290464:exon18:c.G2195T:p.S732I	.	het	.	2	26990601	26990601	C	T	het	116.64	16
2	26990637	26990637	A	G	exonic	Adamts13	.	nonsynonymous SNV	Adamts13:NM_001290465:exon17:c.C2204G:p.S735C,Adamts13:NM_001001322:exon18:c.C2231G:p.S744C,Adamts13:NM_001290463:exon18:c.C2231G:p.S744C,Adamts13:NM_001290464:exon18:c.C2231G:p.S744C	.	het	.	2	26990637	26990637	A	G	het	199.64	21
2	27023637	27023637	A	C	exonic	Slc2a6	.	nonsynonymous SNV	Slc2a6:NM_001177627:exon7:c.C928G:p.Q310E,Slc2a6:NM_172659:exon7:c.C928G:p.Q310E	.	het	.	2	27023637	27023637	A	C	het	91.64	12
2	27102886	27102886	C	G	exonic	Adamtsl2	.	nonsynonymous SNV	Adamtsl2:NM_029981:exon14:c.C2010G:p.D670E	.	het	.	2	27102886	27102886	C	G	het	189.64	43
2	27102902	27102902	T	C	exonic	Adamtsl2	.	nonsynonymous SNV	Adamtsl2:NM_029981:exon14:c.G2026C:p.E676Q	.	het	.	2	27102902	27102902	T	C	het	192.64	45
2	27102938	27102938	T	C	exonic	Adamtsl2	.	nonsynonymous SNV	Adamtsl2:NM_029981:exon14:c.A2062C:p.N688H	.	het	.	2	27102938	27102938	T	C	het	75.64	39
2	27104019	27104019	C	G	exonic	Adamtsl2	.	nonsynonymous SNV	Adamtsl2:NM_029981:exon16:c.T2414G:p.L805R	.	het	.	2	27104019	27104019	C	G	het	199.64	14
2	27104822	27104822	T	C	exonic	Adamtsl2	.	nonsynonymous SNV	Adamtsl2:NM_029981:exon17:c.A2507C:p.Q836P	.	het	.	2	27104822	27104822	T	C	het	79.64	12
2	27174832	27174832	G	A	exonic	Dbh	.	nonsynonymous SNV	Dbh:NM_138942:exon6:c.G1054A:p.G352S	.	het	.	2	27174832	27174832	G	A	het	115.64	19
2	27174959	27174959	G	A	exonic	Dbh	.	nonsynonymous SNV	Dbh:NM_138942:exon6:c.G1181A:p.C394Y	.	het	.	2	27174959	27174959	G	A	het	133.64	21
2	27227099	27227099	A	G	exonic	Sardh	.	nonsynonymous SNV	Sardh:NM_138665:exon12:c.T1535C:p.F512S	.	het	.	2	27227099	27227099	A	G	het	163.64	11
2	27268933	27268933	T	A	exonic	Vav2	.	nonsynonymous SNV	Vav2:NM_009500:exon25:c.G2283T:p.E761D	.	het	.	2	27268933	27268933	T	A	het	240.64	31
2	27459725	27459725	T	C	exonic	Brd3	.	nonsynonymous SNV	Brd3:NM_001113573:exon6:c.C815G:p.A272G,Brd3:NM_001113574:exon6:c.C815G:p.A272G,Brd3:NM_023336:exon6:c.C815G:p.A272G	.	het	.	2	27459725	27459725	T	C	het	52.64	10
2	27757854	27757854	C	T	exonic	Rxra	.	nonsynonymous SNV	Rxra:NM_001290481:exon9:c.A1160T:p.E387V,Rxra:NM_001290482:exon9:c.A1160T:p.E387V,Rxra:NM_011305:exon9:c.A1244T:p.E415V	.	het	.	2	27757854	27757854	C	T	het	124.64	19
2	27759573	27759573	T	C	exonic	Rxra	.	nonsynonymous SNV	Rxra:NM_001290481:exon10:c.T1205C:p.L402P,Rxra:NM_001290482:exon10:c.T1205C:p.L402P,Rxra:NM_011305:exon10:c.T1289C:p.L430P	.	het	.	2	27759573	27759573	T	C	het	98.64	19
2	27886846	27886846	G	A	exonic	Col5a1	.	nonsynonymous SNV	Col5a1:NM_015734:exon1:c.C31A:p.R11S	.	het	.	2	27886846	27886846	G	A	het	192.64	30
2	27886910	27886910	C	T	exonic	Col5a1	.	nonsynonymous SNV	Col5a1:NM_015734:exon1:c.C95T:p.P32L	.	het	.	2	27886910	27886910	C	T	het	324.64	31
2	27958546	27958546	C	T	exonic	Col5a1	.	nonsynonymous SNV	Col5a1:NM_015734:exon11:c.G1493T:p.R498M	.	het	.	2	27958546	27958546	C	T	het	94.64	21
2	27986751	27986751	T	C	exonic	Col5a1	.	nonsynonymous SNV	Col5a1:NM_015734:exon29:c.G2461C:p.D821H	.	het	.	2	27986751	27986751	T	C	het	241.64	15
2	27986769	27986769	C	T	exonic	Col5a1	.	nonsynonymous SNV	Col5a1:NM_015734:exon29:c.G2479T:p.D827Y	.	het	.	2	27986769	27986769	C	T	het	241.64	15
2	28001594	28001594	A	G	exonic	Col5a1	.	nonsynonymous SNV	Col5a1:NM_015734:exon38:c.C2977G:p.P993A	.	het	.	2	28001594	28001594	A	G	het	151.64	19
2	28001615	28001615	C	T	exonic	Col5a1	.	nonsynonymous SNV	Col5a1:NM_015734:exon38:c.G2998T:p.G1000C	.	het	.	2	28001615	28001615	C	T	het	174.64	20
2	28002541	28002541	G	A	exonic	Col5a1	.	nonsynonymous SNV	Col5a1:NM_015734:exon39:c.C3065A:p.P1022H	.	het	.	2	28002541	28002541	G	A	het	93.64	27
2	28079204	28079204	A	G	exonic	Fcnb	.	nonsynonymous SNV	Fcnb:NM_010190:exon7:c.G480C:p.W160C	.	het	.	2	28079204	28079204	A	G	het	128.64	12
2	30309248	30309248	G	A	exonic	Nup188	.	nonsynonymous SNV	Nup188:NM_198304:exon10:c.G827A:p.G276E	.	het	.	2	30309248	30309248	G	A	het	28.64	17
2	30325316	30325316	0	A	exonic	Nup188	.	nonsynonymous SNV	Nup188:NM_198304:exon21:c.G2165A:p.R722H	.	het	.	2	30325316	30325316	-	A	het	62.60	14
2	30325493	30325493	A	G	exonic	Nup188	.	nonsynonymous SNV	Nup188:NM_198304:exon22:c.A2218G:p.I740V	.	het	.	2	30325493	30325493	A	G	het	138.64	21
2	30325510	30325510	0	G	exonic	Nup188	.	nonsynonymous SNV	Nup188:NM_198304:exon22:c.C2235G:p.N745K	.	het	.	2	30325510	30325510	-	G	het	147.60	20
2	30325514	30325514	T	C	exonic	Nup188	.	nonsynonymous SNV	Nup188:NM_198304:exon22:c.T2239C:p.C747R	.	het	.	2	30325514	30325514	T	C	het	147.64	20
2	30327528	30327528	T	C	exonic	Nup188	.	nonsynonymous SNV	Nup188:NM_198304:exon24:c.T2474C:p.I825T	.	het	.	2	30327528	30327528	T	C	het	89.64	22
2	30329348	30329348	T	C	exonic	Nup188	.	nonsynonymous SNV	Nup188:NM_198304:exon25:c.A2575C:p.I859L	.	het	.	2	30329348	30329348	T	C	het	61.64	17
2	30330979	30330979	C	T	exonic	Nup188	.	nonsynonymous SNV	Nup188:NM_198304:exon27:c.G2980T:p.D994Y	.	het	.	2	30330979	30330979	C	T	het	31.64	14
2	30337224	30337224	T	C	exonic	Nup188	.	nonsynonymous SNV	Nup188:NM_198304:exon34:c.T3662C:p.V1221A	.	het	.	2	30337224	30337224	T	C	het	283.64	27
2	30337301	30337301	C	A	exonic	Nup188	.	nonsynonymous SNV	Nup188:NM_198304:exon34:c.G3739A:p.D1247N	.	het	.	2	30337301	30337301	C	A	het	133.64	27
2	30337389	30337389	A	G	exonic	Nup188	.	nonsynonymous SNV	Nup188:NM_198304:exon34:c.A3827G:p.K1276R	.	het	.	2	30337389	30337389	A	G	het	184.64	34
2	30340716	30340716	T	A	exonic	Nup188	.	nonsynonymous SNV	Nup188:NM_198304:exon37:c.T4265A:p.F1422Y	.	het	.	2	30340716	30340716	T	A	het	115.64	12
2	30403622	30403622	T	G	exonic	Crat	.	nonsynonymous SNV	Crat:NM_007760:exon13:c.T1532C:p.I511T	.	het	.	2	30403622	30403622	T	G	het	159.64	18
2	30407045	30407045	C	G	exonic	Crat	.	nonsynonymous SNV	Crat:NM_007760:exon7:c.G895C:p.V299L	.	het	.	2	30407045	30407045	C	G	het	52.64	10
2	31096158	31096158	A	G	exonic	Fnbp1	.	nonsynonymous SNV	Fnbp1:NM_001038700:exon4:c.G214C:p.A72P,Fnbp1:NM_001177648:exon4:c.G214C:p.A72P,Fnbp1:NM_001177649:exon4:c.G214C:p.A72P,Fnbp1:NM_001355105:exon4:c.G214C:p.A72P,Fnbp1:NM_001355106:exon4:c.G214C:p.A72P,Fnbp1:NM_019406:exon4:c.G214C:p.A72P	.	het	.	2	31096158	31096158	A	G	het	154.64	26
2	31152458	31152458	A	G	exonic	Gpr107	.	nonsynonymous SNV	Gpr107:NM_178760:exon1:c.C100G:p.R34G	.	het	.	2	31152458	31152458	A	G	het	181.64	20
2	31168192	31168192	T	G	exonic	Gpr107	.	nonsynonymous SNV	Gpr107:NM_178760:exon3:c.A275G:p.N92S	.	het	.	2	31168192	31168192	T	G	het	112.64	35
2	31168213	31168213	G	A	exonic	Gpr107	.	nonsynonymous SNV	Gpr107:NM_178760:exon3:c.T296A:p.L99Q	.	het	.	2	31168213	31168213	G	A	het	115.64	34
2	31172025	31172025	T	C	exonic	Gpr107	.	nonsynonymous SNV	Gpr107:NM_178760:exon5:c.G464C:p.S155T	.	het	.	2	31172025	31172025	T	C	het	88.64	13
2	31172049	31172049	C	T	exonic	Gpr107	.	nonsynonymous SNV	Gpr107:NM_178760:exon5:c.A488T:p.N163I	.	het	.	2	31172049	31172049	C	T	het	82.64	15
2	31396133	31396133	G	C	exonic	Hmcn2	.	nonsynonymous SNV	Hmcn2:NM_001370902:exon40:c.T6206C:p.L2069P	.	het	.	2	31396133	31396133	G	C	het	190.64	21
2	31396142	31396142	T	C	exonic	Hmcn2	.	nonsynonymous SNV	Hmcn2:NM_001370902:exon40:c.A6215C:p.H2072P	.	het	.	2	31396142	31396142	T	C	het	157.64	20
2	31642319	31642319	T	C	exonic	Prdm12	.	nonsynonymous SNV	Prdm12:NM_001123362:exon2:c.A340C:p.M114L	.	het	.	2	31642319	31642319	T	C	het	200.64	15
2	31689883	31689883	G	A	exonic	Abl1	.	nonsynonymous SNV	Abl1:NM_001112703:exon1:c.C77A:p.A26E	.	het	.	2	31689883	31689883	G	A	het	29.64	26
2	31808915	31808915	G	A	exonic	Qrfp	.	nonsynonymous SNV	Qrfp:NM_183424:exon2:c.A4T:p.R2W	.	het	.	2	31808915	31808915	G	A	het	124.64	16
2	31940732	31940732	A	G	exonic	Lamc3	.	nonsynonymous SNV	Lamc3:NM_011836:exon27:c.C4447G:p.R1483G	.	het	.	2	31940732	31940732	A	G	het	158.64	26
2	31988212	31988212	0	A	exonic	Nup214	.	nonsynonymous SNV	Nup214:NM_172268:exon8:c.G890A:p.S297N	.	het	.	2	31988212	31988212	-	A	het	103.60	11
2	32578210	32578210	A	G	exonic	Pip5kl1	.	nonsynonymous SNV	Pip5kl1:NM_001379020:exon4:c.T513G:p.D171E,Pip5kl1:NM_001379021:exon4:c.T222G:p.D74E,Pip5kl1:NM_198191:exon4:c.T387G:p.D129E	.	het	.	2	32578210	32578210	A	G	het	192.64	31
2	32597200	32597200	T	C	exonic	St6galnac4	.	nonsynonymous SNV	St6galnac4:NM_011373:exon5:c.G906C:p.K302N,St6galnac4:NM_001276425:exon6:c.G906C:p.K302N	.	het	.	2	32597200	32597200	T	C	het	283.64	30
2	32633375	32633375	T	C	exonic	Ak1	.	nonsynonymous SNV	Ak1:NM_001198792:exon5:c.A406C:p.S136R,Ak1:NM_021515:exon5:c.A454C:p.S152R,Ak1:NM_001198790:exon6:c.A406C:p.S136R,Ak1:NM_001198791:exon6:c.A406C:p.S136R	.	het	.	2	32633375	32633375	T	C	het	130.64	25
2	32677660	32677660	A	C	exonic	Eng	.	nonsynonymous SNV	Eng:NM_001146348:exon9:c.G1239C:p.M413I,Eng:NM_001146350:exon9:c.G1242C:p.M414I,Eng:NM_007932:exon9:c.G1242C:p.M414I	.	het	.	2	32677660	32677660	A	C	het	116.64	13
2	32758870	32758870	A	G	exonic	Tor2a	.	nonsynonymous SNV	Tor2a:NM_001369222:exon2:c.C354G:p.S118R,Tor2a:NM_001369223:exon2:c.C351G:p.S117R,Tor2a:NM_001369224:exon2:c.C351G:p.S117R,Tor2a:NM_001369225:exon2:c.C351G:p.S117R,Tor2a:NM_152800:exon2:c.C351G:p.S117R	.	het	.	2	32758870	32758870	A	G	het	49.64	11
2	32774539	32774539	T	C	exonic	Ttc16	.	nonsynonymous SNV	Ttc16:NM_001290563:exon3:c.T85G:p.S29A,Ttc16:NM_177384:exon3:c.T85G:p.S29A	.	het	.	2	32774539	32774539	T	C	het	46.64	12
2	32779302	32779302	T	C	exonic	Cfap157	.	nonsynonymous SNV	Cfap157:NM_025619:exon5:c.A980G:p.N327S	.	het	.	2	32779302	32779302	T	C	het	74.64	12
2	32779723	32779723	G	A	exonic	Cfap157	.	nonsynonymous SNV	Cfap157:NM_025619:exon4:c.A847T:p.I283L	.	het	.	2	32779723	32779723	G	A	het	59.64	17
2	32779761	32779761	A	G	exonic	Cfap157	.	nonsynonymous SNV	Cfap157:NM_025619:exon4:c.T809C:p.M270T	.	het	.	2	32779761	32779761	A	G	het	187.64	25
2	32779764	32779764	G	A	exonic	Cfap157	.	nonsynonymous SNV	Cfap157:NM_025619:exon4:c.A806T:p.E269V	.	het	.	2	32779764	32779764	G	A	het	187.64	25
2	32779834	32779834	C	T	exonic	Cfap157	.	nonsynonymous SNV	Cfap157:NM_025619:exon4:c.C736A:p.H246N	.	het	.	2	32779834	32779834	C	T	het	193.64	31
2	32779882	32779882	A	G	exonic	Cfap157	.	nonsynonymous SNV	Cfap157:NM_025619:exon4:c.A688C:p.I230L	.	het	.	2	32779882	32779882	A	G	het	54.64	20
2	33639661	33639661	T	C	exonic	Lmx1b	.	nonsynonymous SNV	Lmx1b:NM_010725:exon2:c.C172G:p.H58D	.	het	.	2	33639661	33639661	T	C	het	45.64	23
2	34518674	34518674	G	A	exonic	Mapkap1	.	nonsynonymous SNV	Mapkap1:NM_001290626:exon5:c.G97A:p.D33N,Mapkap1:NM_001290625:exon6:c.G673A:p.D225N,Mapkap1:NM_001362920:exon6:c.G97A:p.D33N,Mapkap1:NM_001362921:exon6:c.G673A:p.D225N,Mapkap1:NM_177345:exon6:c.G673A:p.D225N,Mapkap1:NM_001362919:exon7:c.G673A:p.D225N	.	het	.	2	34518674	34518674	G	A	het	293.64	37
2	34518803	34518803	G	A	exonic	Mapkap1	.	nonsynonymous SNV	Mapkap1:NM_001290626:exon5:c.T226A:p.Y76N,Mapkap1:NM_001290625:exon6:c.T802A:p.Y268N,Mapkap1:NM_001362920:exon6:c.T226A:p.Y76N,Mapkap1:NM_001362921:exon6:c.T802A:p.Y268N,Mapkap1:NM_177345:exon6:c.T802A:p.Y268N,Mapkap1:NM_001362919:exon7:c.T802A:p.Y268N	.	het	.	2	34518803	34518803	G	A	het	47.64	19
2	34784555	34784555	T	C	exonic	Rabepk	.	nonsynonymous SNV	Rabepk:NM_001374669:exon6:c.A667G:p.I223V,Rabepk:NM_145522:exon6:c.A691G:p.I231V	.	het	.	2	34784555	34784555	T	C	het	53.64	22
2	34790586	34790586	C	T	exonic	Rabepk	.	nonsynonymous SNV	Rabepk:NM_001374669:exon4:c.C281A:p.P94H,Rabepk:NM_145522:exon4:c.C305A:p.P102H	.	het	.	2	34790586	34790586	C	T	het	89.64	22
2	36870160	36870160	C	G	exonic	Olfr352	.	nonsynonymous SNV	Olfr352:NM_146940:exon1:c.A593G:p.N198S	.	het	.	2	36870160	36870160	C	G	het	27.64	14
2	36906975	36906975	A	C	exonic	Olfr354	.	nonsynonymous SNV	Olfr354:NM_146939:exon1:c.T28C:p.S10P	.	het	.	2	36906975	36906975	A	C	het	26.64	12
2	52295368	52295368	G	A	exonic	Neb	.	nonsynonymous SNV	Neb:NM_010889:exon29:c.A2851T:p.M951L	.	het	.	2	52295368	52295368	G	A	het	46.64	12
2	53146190	53146190	G	A	exonic	Prpf40a	.	nonsynonymous SNV	Prpf40a:NM_001371016:exon16:c.C1843T:p.H615Y,Prpf40a:NM_001371019:exon16:c.C1717T:p.H573Y,Prpf40a:NM_001371020:exon16:c.C1717T:p.H573Y,Prpf40a:NM_001371015:exon17:c.C1897T:p.H633Y,Prpf40a:NM_001371017:exon17:c.C1771T:p.H591Y,Prpf40a:NM_001371018:exon17:c.C1771T:p.H591Y,Prpf40a:NM_018785:exon17:c.C1897T:p.H633Y	.	het	.	2	53146190	53146190	G	A	het	78.64	12
2	65136467	65136467	A	G	exonic	Cobll1	.	nonsynonymous SNV	Cobll1:NM_027225:exon3:c.T346C:p.S116P,Cobll1:NM_177025:exon3:c.T346C:p.S116P,Cobll1:NM_001363076:exon4:c.T442C:p.S148P,Cobll1:NM_001363077:exon4:c.T346C:p.S116P	.	het	.	2	65136467	65136467	A	G	het	28.64	13
2	66285913	66285913	A	G	exonic	Scn1a	.	nonsynonymous SNV	Scn1a:NM_001313997:exon24:c.A4474C:p.K1492Q,Scn1a:NM_018733:exon24:c.A4441C:p.K1481Q	.	het	.	2	66285913	66285913	A	G	het	55.64	12
2	66285984	66285984	T	C	exonic	Scn1a	.	nonsynonymous SNV	Scn1a:NM_001313997:exon24:c.T4403G:p.I1468S,Scn1a:NM_018733:exon24:c.T4370G:p.I1457S	.	het	.	2	66285984	66285984	T	C	het	40.64	11
2	66286021	66286021	A	G	exonic	Scn1a	.	nonsynonymous SNV	Scn1a:NM_001313997:exon24:c.A4366C:p.S1456R,Scn1a:NM_018733:exon24:c.A4333C:p.S1445R	.	het	.	2	66286021	66286021	A	G	het	34.64	13
2	66483781	66483781	A	G	exonic	Scn9a	.	nonsynonymous SNV	Scn9a:NM_001290674:exon27:c.G5592C:p.R1864S,Scn9a:NM_001290675:exon27:c.G5559C:p.R1853S	.	het	.	2	66483781	66483781	A	G	het	52.64	10
2	69442788	69442788	T	G	exonic	Lrp2	.	nonsynonymous SNV	Lrp2:NM_001081088:exon65:c.A12115C:p.K4039Q	.	het	.	2	69442788	69442788	T	G	het	23.64	11
2	69548955	69548955	A	G	exonic	Lrp2	.	nonsynonymous SNV	Lrp2:NM_001081088:exon4:c.G412C:p.D138H	.	het	.	2	69548955	69548955	A	G	het	52.64	10
2	69548958	69548958	C	G	exonic	Lrp2	.	nonsynonymous SNV	Lrp2:NM_001081088:exon4:c.T409C:p.S137P	.	het	.	2	69548958	69548958	C	G	het	52.64	10
2	70009184	70009184	G	A	exonic	Ubr3	.	nonsynonymous SNV	Ubr3:NM_001303033:exon32:c.G4653A:p.M1551I,Ubr3:NM_177783:exon32:c.G4641A:p.M1547I	.	het	.	2	70009184	70009184	G	A	het	46.64	12
2	71333700	71333700	A	G	exonic	Slc25a12	.	nonsynonymous SNV	Slc25a12:NM_172436:exon4:c.T230C:p.F77S	.	het	.	2	71333700	71333700	A	G	het	180.64	11
2	75936592	75936592	A	G	exonic	Ttc30b	.	nonsynonymous SNV	Ttc30b:NM_028235:exon1:c.A1816C:p.S606R	.	het	.	2	75936592	75936592	A	G	het	87.64	12
2	75937597	75937597	A	G	exonic	Ttc30b	.	nonsynonymous SNV	Ttc30b:NM_028235:exon1:c.G811C:p.E271Q	.	het	.	2	75937597	75937597	A	G	het	76.64	13
2	75937755	75937755	A	G	exonic	Ttc30b	.	nonsynonymous SNV	Ttc30b:NM_028235:exon1:c.T653C:p.I218T	.	het	.	2	75937755	75937755	A	G	het	168.64	12
2	75937784	75937784	T	A	exonic	Ttc30b	.	nonsynonymous SNV	Ttc30b:NM_028235:exon1:c.G624T:p.K208N	.	het	.	2	75937784	75937784	T	A	het	147.64	15
2	75938001	75938001	C	A	exonic	Ttc30b	.	nonsynonymous SNV	Ttc30b:NM_028235:exon1:c.A407T:p.E136V	.	het	.	2	75938001	75938001	C	A	het	215.64	13
2	75938064	75938064	G	T	exonic	Ttc30b	.	nonsynonymous SNV	Ttc30b:NM_028235:exon1:c.T344A:p.L115H	.	het	.	2	75938064	75938064	G	T	het	84.64	13
2	80319166	80319166	T	G	exonic	Dnajc10	.	nonsynonymous SNV	Dnajc10:NM_024181:exon3:c.C211G:p.P71A	.	het	.	2	80319166	80319166	T	G	het	158.64	17
2	83658535	83658535	A	G	exonic	Zc3h15	.	nonsynonymous SNV	Zc3h15:NM_026934:exon5:c.A448G:p.M150V	.	het	.	2	83658535	83658535	A	G	het	107.64	16
2	84702419	84702419	A	G	exonic	Zdhhc5	.	nonsynonymous SNV	Zdhhc5:NM_144887:exon3:c.T140C:p.V47A	.	het	.	2	84702419	84702419	A	G	het	87.64	22
2	84950068	84950068	C	T	exonic	Slc43a3	.	nonsynonymous SNV	Slc43a3:NM_021398:exon9:c.G865T:p.A289S	.	het	.	2	84950068	84950068	C	T	het	80.64	14
2	86298280	86298280	G	C	exonic	Olfr1052	.	nonsynonymous SNV	Olfr1052:NM_147010:exon1:c.A463C:p.N155H	.	het	.	2	86298280	86298280	G	C	het	97.64	10
2	86298282	86298282	C	G	exonic	Olfr1052	.	nonsynonymous SNV	Olfr1052:NM_147010:exon1:c.C465G:p.N155K	.	het	.	2	86298282	86298282	C	G	het	97.64	10
2	86978175	86978175	A	G	exonic	Olfr1100	.	nonsynonymous SNV	Olfr1100:NM_146594:exon1:c.T620C:p.L207P	.	het	.	2	86978175	86978175	A	G	het	77.64	11
2	87491182	87491182	A	T	exonic	Pramel7	.	nonsynonymous SNV	Pramel7:NM_178250:exon2:c.T508A:p.W170R	.	het	.	2	87491182	87491182	A	T	het	31.64	11
2	89013276	89013276	G	T	exonic	Olfr1216	.	nonsynonymous SNV	Olfr1216:NM_146893:exon1:c.G787A:p.A263T	.	het	.	2	89013276	89013276	G	T	het	69.64	15
2	89013462	89013462	T	G	exonic	Olfr1216	.	nonsynonymous SNV	Olfr1216:NM_146893:exon1:c.A601C:p.N201H	.	het	.	2	89013462	89013462	T	G	het	85.64	10
2	89013497	89013497	T	A	exonic	Olfr1216	.	nonsynonymous SNV	Olfr1216:NM_146893:exon1:c.C566T:p.T189M	.	het	.	2	89013497	89013497	T	A	het	84.64	10
2	89013726	89013726	A	T	exonic	Olfr1216	.	nonsynonymous SNV	Olfr1216:NM_146893:exon1:c.G337A:p.V113I	.	het	.	2	89013726	89013726	A	T	het	63.64	16
2	90436566	90436566	T	C	exonic	Ptprj	.	nonsynonymous SNV	Ptprj:NM_001135657:exon24:c.C3618G:p.D1206E,Ptprj:NM_008982:exon24:c.C3561G:p.D1187E	.	het	.	2	90436566	90436566	T	C	het	46.64	12
2	90889976	90889976	C	T	exonic	C1qtnf4	.	nonsynonymous SNV	C1qtnf4:NM_026161:exon2:c.C592T:p.P198S	.	het	.	2	90889976	90889976	C	T	het	104.64	14
2	90890282	90890282	T	C	exonic	C1qtnf4	.	nonsynonymous SNV	C1qtnf4:NM_026161:exon2:c.A898C:p.K300Q	.	het	.	2	90890282	90890282	T	C	het	199.64	14
2	91012787	91012787	0	A	exonic	Celf1	.	nonsynonymous SNV	Celf1:NM_001244903:exon12:c.T1278A:p.N426K,Celf1:NM_198683:exon12:c.T1278A:p.N426K,Celf1:NM_001244891:exon13:c.T1278A:p.N426K,Celf1:NM_017368:exon13:c.T1359A:p.N453K	.	het	.	2	91012787	91012787	-	A	het	46.60	10
2	91304832	91304832	T	C	exonic	1110051M20Rik	.	nonsynonymous SNV	1110051M20Rik:NM_001311144:exon4:c.C282G:p.D94E,1110051M20Rik:NM_175123:exon4:c.C282G:p.D94E	.	het	.	2	91304832	91304832	T	C	het	259.64	26
2	91477567	91477567	A	C	exonic	Lrp4	.	nonsynonymous SNV	Lrp4:NM_001145857:exon12:c.G1356C:p.Q452H,Lrp4:NM_172668:exon12:c.G1356C:p.Q452H	.	het	.	2	91477567	91477567	A	C	het	107.64	16
2	91505622	91505622	A	G	exonic	Lrp4	.	nonsynonymous SNV	Lrp4:NM_172668:exon35:c.T5117G:p.L1706R	.	het	.	2	91505622	91505622	A	G	het	313.64	26
2	91773078	91773078	C	T	exonic	Ambra1	.	nonsynonymous SNV	Ambra1:NM_172669:exon7:c.A1406T:p.E469V,Ambra1:NM_001080754:exon8:c.A1133T:p.E378V	.	het	.	2	91773078	91773078	C	T	het	259.64	31
2	92953411	92953411	T	C	exonic	Syt13	.	nonsynonymous SNV	Syt13:NM_030725:exon6:c.A1025C:p.K342T	.	het	.	2	92953411	92953411	T	C	het	52.64	10
2	101897128	101897128	T	C	exonic	Commd9	.	nonsynonymous SNV	Commd9:NM_029635:exon3:c.A266C:p.N89T	.	het	.	2	101897128	101897128	T	C	het	75.64	26
2	102842329	102842329	T	G	exonic	Cd44	.	nonsynonymous SNV	Cd44:NM_001177785:exon7:c.A836C:p.E279A,Cd44:NM_009851:exon10:c.A1205C:p.E402A	.	het	.	2	102842329	102842329	T	G	het	49.64	11
2	102842330	102842330	C	T	exonic	Cd44	.	nonsynonymous SNV	Cd44:NM_001177785:exon7:c.G835A:p.E279K,Cd44:NM_009851:exon10:c.G1204A:p.E402K	.	het	.	2	102842330	102842330	C	T	het	49.64	11
2	102842339	102842339	G	T	exonic	Cd44	.	nonsynonymous SNV	Cd44:NM_001177785:exon7:c.T826A:p.W276R,Cd44:NM_009851:exon10:c.T1195A:p.W399R	.	het	.	2	102842339	102842339	G	T	het	52.64	10
2	102842343	102842343	A	G	exonic	Cd44	.	nonsynonymous SNV	Cd44:NM_001177785:exon7:c.A822C:p.E274D,Cd44:NM_009851:exon10:c.A1191C:p.E397D	.	het	.	2	102842343	102842343	A	G	het	52.64	10
2	103711153	103711153	G	A	exonic	Abtb2	.	nonsynonymous SNV	Abtb2:NM_178890:exon12:c.C2400A:p.D800E	.	het	.	2	103711153	103711153	G	A	het	44.64	13
2	104053383	104053383	C	A	exonic	Fbxo3	.	nonsynonymous SNV	Fbxo3:NM_001355504:exon8:c.T861A:p.D287E,Fbxo3:NM_001355506:exon8:c.T861A:p.D287E,Fbxo3:NM_001355505:exon9:c.T951A:p.D317E,Fbxo3:NM_001355507:exon9:c.T951A:p.D317E,Fbxo3:NM_020593:exon9:c.T951A:p.D317E,Fbxo3:NM_212433:exon9:c.T951A:p.D317E	.	het	.	2	104053383	104053383	C	A	het	145.64	20
2	104084545	104084545	A	G	exonic	Cd59b	.	nonsynonymous SNV	Cd59b:NM_181858:exon4:c.T287G:p.L96R,Cd59b:NM_001368215:exon5:c.T287G:p.L96R	.	het	.	2	104084545	104084545	A	G	het	168.64	10
2	111564810	111564810	C	T	exonic	Olfr1295	.	nonsynonymous SNV	Olfr1295:NM_146403:exon1:c.T633A:p.F211L	.	het	.	2	111564810	111564810	C	T	het	91.64	12
2	111564811	111564811	A	G	exonic	Olfr1295	.	nonsynonymous SNV	Olfr1295:NM_146403:exon1:c.T632C:p.F211S	.	het	.	2	111564811	111564811	A	G	het	91.64	12
2	117177787	117177787	A	G	exonic	Spred1	.	nonsynonymous SNV	Spred1:NM_033524:exon7:c.T1173G:p.C391W	.	het	.	2	117177787	117177787	A	G	het	93.64	10
2	117262905	117262905	C	G	exonic	Fam98b	.	nonsynonymous SNV	Fam98b:NM_026620:exon5:c.A598G:p.S200G	.	het	.	2	117262905	117262905	C	G	het	44.64	10
2	117267798	117267798	T	C	exonic	Fam98b	.	nonsynonymous SNV	Fam98b:NM_026620:exon7:c.G748C:p.A250P	.	het	.	2	117267798	117267798	T	C	het	110.64	21
2	118136505	118136505	C	T	exonic	Fsip1	.	nonsynonymous SNV	Fsip1:NM_001374672:exon11:c.T1338A:p.D446E	.	het	.	2	118136505	118136505	C	T	het	127.64	15
2	118136531	118136531	T	C	exonic	Fsip1	.	nonsynonymous SNV	Fsip1:NM_001374672:exon11:c.T1312G:p.S438A	.	het	.	2	118136531	118136531	T	C	het	37.64	13
2	118251670	118251670	C	T	exonic	Fsip1	.	nonsynonymous SNV	Fsip1:NM_001374672:exon3:c.G282A:p.M94I,Fsip1:NM_027759:exon3:c.G282A:p.M94I	.	het	.	2	118251670	118251670	C	T	het	106.64	15
2	118279417	118279417	G	A	exonic	Gpr176	.	nonsynonymous SNV	Gpr176:NM_201367:exon3:c.G1360T:p.G454C	.	het	.	2	118279417	118279417	G	A	het	61.64	19
2	118279618	118279618	C	T	exonic	Gpr176	.	nonsynonymous SNV	Gpr176:NM_201367:exon3:c.G1159A:p.E387K	.	het	.	2	118279618	118279618	C	T	het	113.64	18
2	118279803	118279803	T	C	exonic	Gpr176	.	nonsynonymous SNV	Gpr176:NM_201367:exon3:c.C974G:p.S325W	.	het	.	2	118279803	118279803	T	C	het	37.64	15
2	118373157	118373157	T	C	exonic	Gpr176	.	nonsynonymous SNV	Gpr176:NM_201367:exon1:c.A31G:p.N11D	.	het	.	2	118373157	118373157	T	C	het	81.64	11
2	118532619	118532619	A	G	exonic	Bmf	.	nonsynonymous SNV	Bmf:NM_001311140:exon4:c.T512C:p.L171P,Bmf:NM_001331221:exon4:c.T497C:p.L166P,Bmf:NM_138313:exon5:c.T755C:p.L252P	.	het	.	2	118532619	118532619	A	G	het	246.64	24
2	118547012	118547012	C	T	exonic	Bmf	.	nonsynonymous SNV	Bmf:NM_001311140:exon2:c.G11A:p.G4E,Bmf:NM_138313:exon3:c.G254A:p.G85E	.	het	.	2	118547012	118547012	C	T	het	107.64	18
2	118549115	118549115	C	T	exonic	Bmf	.	nonsynonymous SNV	Bmf:NM_138313:exon2:c.T179A:p.F60Y	.	het	.	2	118549115	118549115	C	T	het	272.64	21
2	118617713	118617713	A	C	exonic	Bub1b	.	nonsynonymous SNV	Bub1b:NM_009773:exon9:c.T1045C:p.C349R	.	het	.	2	118617713	118617713	A	C	het	128.64	12
2	118709121	118709121	C	G	exonic	Plcb2	.	nonsynonymous SNV	Plcb2:NM_001290790:exon31:c.T3355C:p.F1119L,Plcb2:NM_177568:exon32:c.T3424C:p.F1142L	.	het	.	2	118709121	118709121	C	G	het	49.64	11
2	118709135	118709135	T	C	exonic	Plcb2	.	nonsynonymous SNV	Plcb2:NM_001290790:exon31:c.C3341G:p.S1114W,Plcb2:NM_177568:exon32:c.C3410G:p.S1137W	.	het	.	2	118709135	118709135	T	C	het	52.64	10
2	118709164	118709164	C	T	exonic	Plcb2	.	nonsynonymous SNV	Plcb2:NM_001290790:exon31:c.G3312A:p.M1104I,Plcb2:NM_177568:exon32:c.G3381A:p.M1127I	.	het	.	2	118709164	118709164	C	T	het	62.64	10
2	118710821	118710821	A	G	exonic	Plcb2	.	nonsynonymous SNV	Plcb2:NM_001290790:exon28:c.G3034C:p.D1012H,Plcb2:NM_177568:exon29:c.G3103C:p.D1035H	.	het	.	2	118710821	118710821	A	G	het	40.64	14
2	118711513	118711513	A	G	exonic	Plcb2	.	nonsynonymous SNV	Plcb2:NM_001290790:exon25:c.A2615C:p.E872A,Plcb2:NM_177568:exon26:c.A2684C:p.E895A	.	het	.	2	118711513	118711513	A	G	het	74.64	12
2	118713892	118713892	C	A	exonic	Plcb2	.	nonsynonymous SNV	Plcb2:NM_001290790:exon19:c.C2003T:p.S668F,Plcb2:NM_177568:exon20:c.C2072T:p.S691F	.	het	.	2	118713892	118713892	C	A	het	182.64	17
2	118715396	118715396	T	C	exonic	Plcb2	.	nonsynonymous SNV	Plcb2:NM_001290790:exon17:c.T1807G:p.C603G,Plcb2:NM_177568:exon18:c.T1876G:p.C626G	.	het	.	2	118715396	118715396	T	C	het	234.64	16
2	118715413	118715413	A	G	exonic	Plcb2	.	nonsynonymous SNV	Plcb2:NM_001290790:exon17:c.T1790C:p.M597T,Plcb2:NM_177568:exon18:c.T1859C:p.M620T	.	het	.	2	118715413	118715413	A	G	het	287.64	16
2	118717048	118717048	A	G	exonic	Plcb2	.	nonsynonymous SNV	Plcb2:NM_001290790:exon15:c.A1609C:p.I537L,Plcb2:NM_177568:exon16:c.A1678C:p.I560L	.	het	.	2	118717048	118717048	A	G	het	146.64	15
2	118717221	118717221	C	A	exonic	Plcb2	.	nonsynonymous SNV	Plcb2:NM_001290790:exon14:c.G1524T:p.Q508H,Plcb2:NM_177568:exon15:c.G1593T:p.Q531H	.	het	.	2	118717221	118717221	C	A	het	142.64	10
2	118718795	118718795	0	C	exonic	Plcb2	.	nonsynonymous SNV	Plcb2:NM_001290790:exon10:c.A1085G:p.K362R,Plcb2:NM_177568:exon11:c.A1154G:p.K385R	.	het	.	2	118718795	118718795	-	C	het	43.60	13
2	118719209	118719209	C	T	exonic	Plcb2	.	nonsynonymous SNV	Plcb2:NM_001290790:exon9:c.G833A:p.S278N,Plcb2:NM_177568:exon10:c.G902A:p.S301N	.	het	.	2	118719209	118719209	C	T	het	124.64	16
2	118746418	118746418	A	G	exonic	Inafm2	.	nonsynonymous SNV	Inafm2:NM_001301269:exon1:c.C304G:p.R102G	.	het	.	2	118746418	118746418	A	G	het	229.64	25
2	118746496	118746496	G	A	exonic	Inafm2	.	nonsynonymous SNV	Inafm2:NM_001301269:exon1:c.C382A:p.L128M	.	het	.	2	118746496	118746496	G	A	het	73.64	28
2	118760329	118760329	C	T	exonic	Ccdc9b	.	nonsynonymous SNV	Ccdc9b:NM_001001982:exon5:c.G646A:p.A216T	.	het	.	2	118760329	118760329	C	T	het	151.64	15
2	118777799	118777799	G	T	exonic	Phgr1	.	nonsynonymous SNV	Phgr1:NM_001145644:exon4:c.G103T:p.G35C	.	het	.	2	118777799	118777799	G	T	het	188.64	22
2	118877749	118877749	T	C	exonic	Ivd	.	nonsynonymous SNV	Ivd:NM_019826:exon10:c.G1052C:p.G351A	.	het	.	2	118877749	118877749	T	C	het	178.64	23
2	119038674	119038674	G	A	exonic	Rpusd2	.	nonsynonymous SNV	Rpusd2:NM_173450:exon3:c.T1577A:p.L526Q	.	het	.	2	119038674	119038674	G	A	het	43.64	10
2	119038686	119038686	T	C	exonic	Rpusd2	.	nonsynonymous SNV	Rpusd2:NM_173450:exon3:c.G1589C:p.R530P	.	het	.	2	119038686	119038686	T	C	het	43.64	10
2	119068166	119068166	C	T	exonic	Knl1	.	nonsynonymous SNV	Knl1:NM_001362732:exon8:c.A347T:p.D116V,Knl1:NM_029617:exon8:c.A347T:p.D116V	.	het	.	2	119068166	119068166	C	T	het	178.64	15
2	119068675	119068675	T	C	exonic	Knl1	.	nonsynonymous SNV	Knl1:NM_001362732:exon8:c.G856C:p.G286R,Knl1:NM_029617:exon8:c.G856C:p.G286R	.	het	.	2	119068675	119068675	T	C	het	185.64	28
2	119068975	119068975	C	T	exonic	Knl1	.	nonsynonymous SNV	Knl1:NM_001362732:exon8:c.A1156T:p.S386C,Knl1:NM_029617:exon8:c.A1156T:p.S386C	.	het	.	2	119068975	119068975	C	T	het	85.64	22
2	119069596	119069596	A	G	exonic	Knl1	.	nonsynonymous SNV	Knl1:NM_001362732:exon8:c.A1777G:p.S593G,Knl1:NM_029617:exon8:c.A1777G:p.S593G	.	het	.	2	119069596	119069596	A	G	het	177.64	20
2	119069660	119069660	C	T	exonic	Knl1	.	nonsynonymous SNV	Knl1:NM_001362732:exon8:c.G1841T:p.R614I,Knl1:NM_029617:exon8:c.G1841T:p.R614I	.	het	.	2	119069660	119069660	C	T	het	60.64	20
2	119070305	119070305	C	G	exonic	Knl1	.	nonsynonymous SNV	Knl1:NM_001362732:exon8:c.A2486G:p.Q829R,Knl1:NM_029617:exon8:c.A2486G:p.Q829R	.	het	.	2	119070305	119070305	C	G	het	276.64	19
2	119070400	119070400	T	C	exonic	Knl1	.	nonsynonymous SNV	Knl1:NM_001362732:exon8:c.G2581C:p.E861Q,Knl1:NM_029617:exon8:c.G2581C:p.E861Q	.	het	.	2	119070400	119070400	T	C	het	185.64	17
2	119076995	119076995	T	G	exonic	Knl1	.	nonsynonymous SNV	Knl1:NM_029617:exon10:c.T4999G:p.L1667V	.	het	.	2	119076995	119076995	T	G	het	113.64	17
2	119099816	119099816	G	T	exonic	Knl1	.	nonsynonymous SNV	Knl1:NM_029617:exon20:c.A5894T:p.Q1965L	.	het	.	2	119099816	119099816	G	T	het	179.64	22
2	119102081	119102081	T	C	exonic	Knl1	.	nonsynonymous SNV	Knl1:NM_029617:exon22:c.A6118C:p.I2040L	.	het	.	2	119102081	119102081	T	C	het	142.64	10
2	119134183	119134183	A	G	exonic	Rad51	.	nonsynonymous SNV	Rad51:NM_011234:exon8:c.C754G:p.L252V	.	het	.	2	119134183	119134183	A	G	het	80.64	10
2	119186054	119186054	T	C	exonic	Dnajc17	.	nonsynonymous SNV	Dnajc17:NM_139139:exon3:c.A182G:p.E61G	.	het	.	2	119186054	119186054	T	C	het	66.64	16
2	119186067	119186067	A	G	exonic	Dnajc17	.	nonsynonymous SNV	Dnajc17:NM_139139:exon3:c.T169C:p.S57P	.	het	.	2	119186067	119186067	A	G	het	67.64	16
2	119377358	119377358	G	A	exonic	Ino80	.	nonsynonymous SNV	Ino80:NM_026574:exon35:c.A4451T:p.N1484I	.	het	.	2	119377358	119377358	G	A	het	74.64	19
2	119377416	119377416	A	G	exonic	Ino80	.	nonsynonymous SNV	Ino80:NM_026574:exon35:c.G4393C:p.G1465R	.	het	.	2	119377416	119377416	A	G	het	130.64	22
2	119425274	119425274	G	A	exonic	Ino80	.	nonsynonymous SNV	Ino80:NM_026574:exon23:c.A2729T:p.Q910L	.	het	.	2	119425274	119425274	G	A	het	93.64	10
2	119584597	119584597	G	A	exonic	Chp1	.	nonsynonymous SNV	Chp1:NM_019769:exon6:c.T479A:p.I160N	.	het	.	2	119584597	119584597	G	A	het	31.64	14
2	119618161	119618161	A	G	exonic	Oip5	.	nonsynonymous SNV	Oip5:NM_001042653:exon1:c.T301C:p.S101P	.	het	.	2	119618161	119618161	A	G	het	79.64	12
2	119618247	119618247	A	C	exonic	Oip5	.	nonsynonymous SNV	Oip5:NM_001042653:exon1:c.T215G:p.F72C	.	het	.	2	119618247	119618247	A	C	het	211.64	17
2	119618373	119618373	G	A	exonic	Oip5	.	nonsynonymous SNV	Oip5:NM_001042653:exon1:c.C89T:p.S30F	.	het	.	2	119618373	119618373	G	A	het	52.64	10
2	119638554	119638554	G	A	exonic	Nusap1	.	nonsynonymous SNV	Nusap1:NM_001042652:exon6:c.T695A:p.M232K,Nusap1:NM_133851:exon7:c.T794A:p.M265K	.	het	.	2	119638554	119638554	G	A	het	246.64	24
2	119728732	119728732	G	A	exonic	Rtf1	.	nonsynonymous SNV	Rtf1:NM_030112:exon14:c.T1751A:p.L584Q	.	het	.	2	119728732	119728732	G	A	het	165.64	16
2	119902884	119902884	G	A	exonic	Mga	.	nonsynonymous SNV	Mga:NM_001164274:exon2:c.C212A:p.T71N,Mga:NM_013720:exon2:c.C212A:p.T71N	.	het	.	2	119902884	119902884	G	A	het	185.64	20
2	119902977	119902977	T	C	exonic	Mga	.	nonsynonymous SNV	Mga:NM_001164274:exon2:c.G305C:p.R102T,Mga:NM_013720:exon2:c.G305C:p.R102T	.	het	.	2	119902977	119902977	T	C	het	353.64	35
2	119903238	119903238	C	T	exonic	Mga	.	nonsynonymous SNV	Mga:NM_001164274:exon2:c.A566T:p.E189V,Mga:NM_013720:exon2:c.A566T:p.E189V	.	het	.	2	119903238	119903238	C	T	het	190.64	21
2	119903263	119903263	C	T	exonic	Mga	.	nonsynonymous SNV	Mga:NM_001164274:exon2:c.G591T:p.M197I,Mga:NM_013720:exon2:c.G591T:p.M197I	.	het	.	2	119903263	119903263	C	T	het	225.64	23
2	119903409	119903409	C	T	exonic	Mga	.	nonsynonymous SNV	Mga:NM_001164274:exon2:c.A737T:p.Q246L,Mga:NM_013720:exon2:c.A737T:p.Q246L	.	het	.	2	119903409	119903409	C	T	het	139.64	11
2	119903612	119903612	T	A	exonic	Mga	.	nonsynonymous SNV	Mga:NM_001164274:exon2:c.C940A:p.H314N,Mga:NM_013720:exon2:c.C940A:p.H314N	.	het	.	2	119903612	119903612	T	A	het	72.64	14
2	119916681	119916681	G	C	exonic	Mga	.	nonsynonymous SNV	Mga:NM_001164274:exon3:c.G1312C:p.D438H,Mga:NM_013720:exon3:c.G1312C:p.D438H	.	het	.	2	119916681	119916681	G	C	het	176.64	23
2	119916944	119916944	A	G	exonic	Mga	.	nonsynonymous SNV	Mga:NM_001164274:exon3:c.T1575G:p.N525K,Mga:NM_013720:exon3:c.T1575G:p.N525K	.	het	.	2	119916944	119916944	A	G	het	304.64	16
2	119916952	119916952	T	C	exonic	Mga	.	nonsynonymous SNV	Mga:NM_001164274:exon3:c.G1583C:p.R528T,Mga:NM_013720:exon3:c.G1583C:p.R528T	.	het	.	2	119916952	119916952	T	C	het	262.64	15
2	119917077	119917077	G	T	exonic	Mga	.	nonsynonymous SNV	Mga:NM_001164274:exon3:c.A1708T:p.T570S,Mga:NM_013720:exon3:c.A1708T:p.T570S	.	het	.	2	119917077	119917077	G	T	het	285.64	19
2	119917109	119917109	C	T	exonic	Mga	.	nonsynonymous SNV	Mga:NM_001164274:exon3:c.A1740T:p.L580F,Mga:NM_013720:exon3:c.A1740T:p.L580F	.	het	.	2	119917109	119917109	C	T	het	222.64	17
2	119917153	119917153	T	G	exonic	Mga	.	nonsynonymous SNV	Mga:NM_001164274:exon3:c.A1784G:p.K595R,Mga:NM_013720:exon3:c.A1784G:p.K595R	.	het	.	2	119917153	119917153	T	G	het	97.64	10
2	119921755	119921755	G	A	exonic	Mga	.	nonsynonymous SNV	Mga:NM_001164274:exon7:c.G2329A:p.V777I,Mga:NM_013720:exon7:c.G2329A:p.V777I	.	het	.	2	119921755	119921755	G	A	het	416.64	20
2	120010759	120010759	A	C	exonic	Mapkbp1	.	nonsynonymous SNV	Mapkbp1:NM_001355293:exon3:c.T226C:p.F76L,Mapkbp1:NM_011941:exon3:c.T226C:p.F76L	.	het	.	2	120010759	120010759	A	C	het	82.64	11
2	120012050	120012050	T	C	exonic	Mapkbp1	.	nonsynonymous SNV	Mapkbp1:NM_001355293:exon5:c.A448C:p.I150L,Mapkbp1:NM_011941:exon5:c.A448C:p.I150L	.	het	.	2	120012050	120012050	T	C	het	78.64	12
2	120013628	120013628	C	T	exonic	Mapkbp1	.	nonsynonymous SNV	Mapkbp1:NM_011941:exon8:c.G832T:p.A278S,Mapkbp1:NM_001355293:exon9:c.G850T:p.A284S	.	het	.	2	120013628	120013628	C	T	het	160.64	15
2	120013719	120013719	T	C	exonic	Mapkbp1	.	nonsynonymous SNV	Mapkbp1:NM_011941:exon8:c.T923C:p.L308P,Mapkbp1:NM_001355293:exon9:c.T941C:p.L314P	.	het	.	2	120013719	120013719	T	C	het	223.64	13
2	120013761	120013761	T	A	exonic	Mapkbp1	.	nonsynonymous SNV	Mapkbp1:NM_011941:exon8:c.C965A:p.A322D,Mapkbp1:NM_001355293:exon9:c.C983A:p.A328D	.	het	.	2	120013761	120013761	T	A	het	127.64	15
2	120013768	120013768	A	G	exonic	Mapkbp1	.	nonsynonymous SNV	Mapkbp1:NM_011941:exon8:c.C972G:p.I324M,Mapkbp1:NM_001355293:exon9:c.C990G:p.I330M	.	het	.	2	120013768	120013768	A	G	het	130.64	14
2	120015373	120015373	T	C	exonic	Mapkbp1	.	nonsynonymous SNV	Mapkbp1:NM_011941:exon10:c.G1204C:p.A402P,Mapkbp1:NM_001355293:exon11:c.G1222C:p.A408P	.	het	.	2	120015373	120015373	T	C	het	310.64	22
2	120015442	120015442	C	G	exonic	Mapkbp1	.	nonsynonymous SNV	Mapkbp1:NM_011941:exon10:c.A1273G:p.S425G,Mapkbp1:NM_001355293:exon11:c.A1291G:p.S431G	.	het	.	2	120015442	120015442	C	G	het	281.64	26
2	120015767	120015767	T	C	exonic	Mapkbp1	.	nonsynonymous SNV	Mapkbp1:NM_011941:exon11:c.A1395C:p.K465N,Mapkbp1:NM_001355293:exon12:c.A1413C:p.K471N	.	het	.	2	120015767	120015767	T	C	het	162.64	28
2	120031326	120031326	C	T	exonic	Jmjd7	.	nonsynonymous SNV	Jmjd7:NM_001114637:exon5:c.G549T:p.E183D	.	het	.	2	120031326	120031326	C	T	het	346.64	17
2	120031867	120031867	A	C	exonic	Jmjd7	.	nonsynonymous SNV	Jmjd7:NM_001114637:exon7:c.G729C:p.L243F	.	het	.	2	120031867	120031867	A	C	het	42.64	12
2	120031917	120031917	A	G	exonic	Jmjd7	.	nonsynonymous SNV	Jmjd7:NM_001114637:exon7:c.A779G:p.H260R	.	het	.	2	120031917	120031917	A	G	het	73.64	18
2	120031921	120031921	A	G	exonic	Jmjd7	.	nonsynonymous SNV	Jmjd7:NM_001114637:exon7:c.C783G:p.C261W	.	het	.	2	120031921	120031921	A	G	het	73.64	18
2	120031941	120031941	T	A	exonic	Jmjd7	.	nonsynonymous SNV	Jmjd7:NM_001114637:exon7:c.T803A:p.M268K	.	het	.	2	120031941	120031941	T	A	het	134.64	21
2	120068650	120068650	T	C	exonic	Sptbn5	.	nonsynonymous SNV	Sptbn5:NM_001370938:exon22:c.T4045G:p.L1349V	.	het	.	2	120068650	120068650	T	C	het	189.64	19
2	120068686	120068686	A	G	exonic	Sptbn5	.	nonsynonymous SNV	Sptbn5:NM_001370938:exon22:c.G4009C:p.E1337Q	.	het	.	2	120068686	120068686	A	G	het	240.64	19
2	120068689	120068689	A	G	exonic	Sptbn5	.	nonsynonymous SNV	Sptbn5:NM_001370938:exon22:c.A4006C:p.S1336R	.	het	.	2	120068689	120068689	A	G	het	208.64	18
2	120171263	120171263	T	C	exonic	Pla2g4e	.	nonsynonymous SNV	Pla2g4e:NM_001363091:exon17:c.T785G:p.L262R,Pla2g4e:NM_177845:exon17:c.T1904G:p.L635R,Pla2g4e:NM_001363090:exon18:c.T1637G:p.L546R	.	het	.	2	120171263	120171263	T	C	het	48.64	10
2	120281002	120281002	G	A	exonic	Pla2g4d	.	nonsynonymous SNV	Pla2g4d:NM_001024137:exon5:c.G447T:p.M149I	.	het	.	2	120281002	120281002	G	A	het	25.64	16
2	120307241	120307241	T	C	exonic	Pla2g4f	.	nonsynonymous SNV	Pla2g4f:NM_001024145:exon11:c.C1037G:p.A346G,Pla2g4f:NM_001363073:exon11:c.C1034G:p.A345G,Pla2g4f:NM_001363074:exon11:c.C1034G:p.A345G,Pla2g4f:NM_001363075:exon11:c.C1031G:p.A344G	.	het	.	2	120307241	120307241	T	C	het	115.64	19
2	120307251	120307251	G	T	exonic	Pla2g4f	.	nonsynonymous SNV	Pla2g4f:NM_001024145:exon11:c.T1027A:p.L343M,Pla2g4f:NM_001363073:exon11:c.T1024A:p.L342M,Pla2g4f:NM_001363074:exon11:c.T1024A:p.L342M,Pla2g4f:NM_001363075:exon11:c.T1021A:p.L341M	.	het	.	2	120307251	120307251	G	T	het	121.64	17
2	120307590	120307590	A	G	exonic	Pla2g4f	.	nonsynonymous SNV	Pla2g4f:NM_001024145:exon10:c.T887C:p.V296A,Pla2g4f:NM_001363073:exon10:c.T887C:p.V296A,Pla2g4f:NM_001363074:exon10:c.T884C:p.V295A,Pla2g4f:NM_001363075:exon10:c.T884C:p.V295A	.	het	.	2	120307590	120307590	A	G	het	256.64	18
2	120311079	120311079	T	A	exonic	Pla2g4f	.	nonsynonymous SNV	Pla2g4f:NM_001024145:exon7:c.A536T:p.H179L,Pla2g4f:NM_001363073:exon7:c.A536T:p.H179L,Pla2g4f:NM_001363074:exon7:c.A533T:p.H178L,Pla2g4f:NM_001363075:exon7:c.A533T:p.H178L	.	het	.	2	120311079	120311079	T	A	het	84.64	13
2	120312407	120312407	C	T	exonic	Pla2g4f	.	nonsynonymous SNV	Pla2g4f:NM_001024145:exon3:c.C221A:p.P74H,Pla2g4f:NM_001363073:exon3:c.C221A:p.P74H,Pla2g4f:NM_001363074:exon3:c.C218A:p.P73H,Pla2g4f:NM_001363075:exon3:c.C218A:p.P73H	.	het	.	2	120312407	120312407	C	T	het	151.64	15
2	120394436	120394436	A	G	exonic	Tmem87a	.	nonsynonymous SNV	Tmem87a:NM_001110496:exon4:c.A343C:p.K115Q,Tmem87a:NM_001110497:exon4:c.A343C:p.K115Q,Tmem87a:NM_173734:exon4:c.A343C:p.K115Q	.	het	.	2	120394436	120394436	A	G	het	105.64	14
2	120515495	120515495	G	T	exonic	Zfp106	.	nonsynonymous SNV	Zfp106:NM_011743:exon17:c.G5146A:p.D1716N	.	het	.	2	120515495	120515495	G	T	het	43.64	13
2	120515498	120515498	T	C	exonic	Zfp106	.	nonsynonymous SNV	Zfp106:NM_011743:exon17:c.A5143G:p.N1715D	.	het	.	2	120515498	120515498	T	C	het	43.64	13
2	120523877	120523877	A	G	exonic	Zfp106	.	nonsynonymous SNV	Zfp106:NM_011743:exon11:c.G4481C:p.G1494A	.	het	.	2	120523877	120523877	A	G	het	144.64	17
2	120523998	120523998	G	A	exonic	Zfp106	.	nonsynonymous SNV	Zfp106:NM_011743:exon11:c.C4360T:p.P1454S	.	het	.	2	120523998	120523998	G	A	het	170.64	25
2	120524126	120524126	A	G	exonic	Zfp106	.	nonsynonymous SNV	Zfp106:NM_011743:exon11:c.A4232C:p.Q1411P	.	het	.	2	120524126	120524126	A	G	het	145.64	32
2	120524174	120524174	G	A	exonic	Zfp106	.	nonsynonymous SNV	Zfp106:NM_011743:exon11:c.A4184T:p.K1395M	.	het	.	2	120524174	120524174	G	A	het	175.64	29
2	120524258	120524258	G	T	exonic	Zfp106	.	nonsynonymous SNV	Zfp106:NM_011743:exon11:c.G4100A:p.R1367Q	.	het	.	2	120524258	120524258	G	T	het	97.64	22
2	120524264	120524264	C	A	exonic	Zfp106	.	nonsynonymous SNV	Zfp106:NM_011743:exon11:c.A4094T:p.K1365I	.	het	.	2	120524264	120524264	C	A	het	67.64	19
2	120533545	120533545	G	C	exonic	Zfp106	.	nonsynonymous SNV	Zfp106:NM_011743:exon5:c.A2449G:p.K817E	.	het	.	2	120533545	120533545	G	C	het	139.64	11
2	120533585	120533585	A	G	exonic	Zfp106	.	nonsynonymous SNV	Zfp106:NM_011743:exon5:c.G2409C:p.R803S	.	het	.	2	120533585	120533585	A	G	het	159.64	11
2	120534010	120534010	A	G	exonic	Zfp106	.	nonsynonymous SNV	Zfp106:NM_011743:exon5:c.A1984C:p.T662P	.	het	.	2	120534010	120534010	A	G	het	71.64	16
2	120534138	120534138	T	C	exonic	Zfp106	.	nonsynonymous SNV	Zfp106:NM_011743:exon5:c.T1856G:p.I619R	.	het	.	2	120534138	120534138	T	C	het	73.64	18
2	120534195	120534195	T	C	exonic	Zfp106	.	nonsynonymous SNV	Zfp106:NM_011743:exon5:c.C1799G:p.S600C	.	het	.	2	120534195	120534195	T	C	het	101.64	22
2	120534196	120534196	G	T	exonic	Zfp106	.	nonsynonymous SNV	Zfp106:NM_011743:exon5:c.T1798A:p.S600T	.	het	.	2	120534196	120534196	G	T	het	101.64	22
2	120534279	120534279	C	G	exonic	Zfp106	.	nonsynonymous SNV	Zfp106:NM_011743:exon5:c.T1715C:p.L572P	.	het	.	2	120534279	120534279	C	G	het	83.64	27
2	120534501	120534501	C	T	exonic	Zfp106	.	nonsynonymous SNV	Zfp106:NM_011743:exon5:c.C1493A:p.S498Y	.	het	.	2	120534501	120534501	C	T	het	151.64	22
2	120534602	120534602	A	G	exonic	Zfp106	.	nonsynonymous SNV	Zfp106:NM_011743:exon5:c.G1392C:p.K464N	.	het	.	2	120534602	120534602	A	G	het	184.64	26
2	120534650	120534650	C	A	exonic	Zfp106	.	nonsynonymous SNV	Zfp106:NM_011743:exon5:c.A1344T:p.R448S	.	het	.	2	120534650	120534650	C	A	het	144.64	20
2	120534667	120534667	A	G	exonic	Zfp106	.	nonsynonymous SNV	Zfp106:NM_011743:exon5:c.T1327C:p.F443L	.	het	.	2	120534667	120534667	A	G	het	143.64	19
2	120535157	120535157	C	A	exonic	Zfp106	.	nonsynonymous SNV	Zfp106:NM_011743:exon5:c.A837T:p.E279D	.	het	.	2	120535157	120535157	C	A	het	76.64	17
2	120535180	120535180	T	C	exonic	Zfp106	.	nonsynonymous SNV	Zfp106:NM_011743:exon5:c.A814G:p.R272G	.	het	.	2	120535180	120535180	T	C	het	63.64	17
2	120535257	120535257	A	C	exonic	Zfp106	.	nonsynonymous SNV	Zfp106:NM_011743:exon5:c.A737G:p.N246S	.	het	.	2	120535257	120535257	A	C	het	91.64	12
2	120535265	120535265	T	C	exonic	Zfp106	.	nonsynonymous SNV	Zfp106:NM_011743:exon5:c.T729G:p.S243R	.	het	.	2	120535265	120535265	T	C	het	94.64	11
2	120535284	120535284	G	A	exonic	Zfp106	.	nonsynonymous SNV	Zfp106:NM_011743:exon5:c.G710T:p.S237I	.	het	.	2	120535284	120535284	G	A	het	156.64	12
2	120535315	120535315	A	G	exonic	Zfp106	.	nonsynonymous SNV	Zfp106:NM_011743:exon5:c.T679C:p.W227R	.	het	.	2	120535315	120535315	A	G	het	217.64	15
2	120535459	120535459	C	T	exonic	Zfp106	.	nonsynonymous SNV	Zfp106:NM_011743:exon5:c.C535A:p.P179T	.	het	.	2	120535459	120535459	C	T	het	28.64	15
2	120535635	120535635	A	G	exonic	Zfp106	.	nonsynonymous SNV	Zfp106:NM_011743:exon5:c.A359C:p.D120A	.	het	.	2	120535635	120535635	A	G	het	251.64	16
2	120875444	120875444	T	C	exonic	Ubr1	.	nonsynonymous SNV	Ubr1:NM_009461:exon41:c.A4537G:p.I1513V	.	het	.	2	120875444	120875444	T	C	het	73.64	14
2	120881144	120881144	C	A	exonic	Ubr1	.	nonsynonymous SNV	Ubr1:NM_009461:exon39:c.A4268T:p.D1423V	.	het	.	2	120881144	120881144	C	A	het	41.64	11
2	120926036	120926036	T	C	exonic	Ubr1	.	nonsynonymous SNV	Ubr1:NM_009461:exon19:c.T2109G:p.D703E	.	het	.	2	120926036	120926036	T	C	het	67.64	16
2	120970565	120970565	C	G	exonic	Ubr1	.	nonsynonymous SNV	Ubr1:NM_009461:exon1:c.A38C:p.D13A	.	het	.	2	120970565	120970565	C	G	het	187.64	30
2	121138769	121138769	C	T	exonic	Lcmt2	.	nonsynonymous SNV	Lcmt2:NM_177846:exon1:c.T1832A:p.V611D	.	het	.	2	121138769	121138769	C	T	het	87.64	12
2	121196179	121196179	C	T	exonic	Tubgcp4	.	nonsynonymous SNV	Tubgcp4:NM_001290824:exon17:c.C1925T:p.A642V,Tubgcp4:NM_153387:exon17:c.C1928T:p.A643V	.	het	.	2	121196179	121196179	C	T	het	80.64	10
2	121202705	121202705	T	G	exonic	Trp53bp1	.	nonsynonymous SNV	Trp53bp1:NM_001290830:exon23:c.G4969C:p.G1657R,Trp53bp1:NM_013735:exon24:c.G5119C:p.G1707R	.	het	.	2	121202705	121202705	T	G	het	109.64	17
2	121207940	121207940	C	T	exonic	Trp53bp1	.	nonsynonymous SNV	Trp53bp1:NM_001290830:exon20:c.T4266A:p.D1422E,Trp53bp1:NM_013735:exon21:c.T4416A:p.D1472E	.	het	.	2	121207940	121207940	C	T	het	193.64	23
2	121209243	121209243	T	C	exonic	Trp53bp1	.	nonsynonymous SNV	Trp53bp1:NM_001290830:exon19:c.A3914G:p.K1305R,Trp53bp1:NM_013735:exon19:c.A3914G:p.K1305R	.	het	.	2	121209243	121209243	T	C	het	69.64	15
2	121244036	121244036	T	A	exonic	Trp53bp1	.	nonsynonymous SNV	Trp53bp1:NM_001290830:exon11:c.A1232T:p.D411V,Trp53bp1:NM_013735:exon11:c.A1232T:p.D411V	.	het	.	2	121244036	121244036	T	A	het	175.64	13
2	121303989	121303989	G	T	exonic	Map1a	.	nonsynonymous SNV	Map1a:NM_001173506:exon4:c.A4571T:p.E1524V,Map1a:NM_032393:exon5:c.A5285T:p.E1762V	.	het	.	2	121303989	121303989	G	T	het	31.64	13
2	121311998	121311998	C	T	exonic	Ppip5k1	.	nonsynonymous SNV	Ppip5k1:NM_178795:exon30:c.T3969A:p.H1323Q	.	het	.	2	121311998	121311998	C	T	het	85.64	10
2	121336781	121336781	A	T	exonic	Ppip5k1	.	nonsynonymous SNV	Ppip5k1:NM_178795:exon21:c.G2510A:p.S837N	.	het	.	2	121336781	121336781	A	T	het	77.64	23
2	121367637	121367637	A	G	exonic	Strc	.	nonsynonymous SNV	Strc:NM_080459:exon22:c.G4438C:p.V1480L	.	het	.	2	121367637	121367637	A	G	het	101.64	21
2	121380823	121380823	C	T	exonic	Strc	.	nonsynonymous SNV	Strc:NM_080459:exon1:c.T40A:p.S14T	.	het	.	2	121380823	121380823	C	T	het	28.64	15
2	121406728	121406728	G	A	exonic	Catsper2	.	nonsynonymous SNV	Catsper2:NM_153075:exon6:c.G690T:p.L230F	.	het	.	2	121406728	121406728	G	A	het	69.64	18
2	121450769	121450769	T	A	exonic	Serf2	.	nonsynonymous SNV	Serf2:NM_001290837:exon3:c.G188A:p.R63K	.	het	.	2	121450769	121450769	T	A	het	119.64	12
2	122065474	122065474	T	C	exonic	Spg11	.	nonsynonymous SNV	Spg11:NM_145531:exon30:c.C5262G:p.S1754R	.	het	.	2	122065474	122065474	T	C	het	107.64	16
2	122065488	122065488	C	T	exonic	Spg11	.	nonsynonymous SNV	Spg11:NM_145531:exon30:c.G5248A:p.A1750T	.	het	.	2	122065488	122065488	C	T	het	101.64	18
2	122072185	122072185	C	A	exonic	Spg11	.	nonsynonymous SNV	Spg11:NM_145531:exon25:c.A4262T:p.K1421I	.	het	.	2	122072185	122072185	C	A	het	85.64	14
2	122083524	122083524	T	C	exonic	Spg11	.	nonsynonymous SNV	Spg11:NM_145531:exon19:c.A3305G:p.K1102R	.	het	.	2	122083524	122083524	T	C	het	97.64	14
2	122113149	122113149	G	T	exonic	Spg11	.	nonsynonymous SNV	Spg11:NM_145531:exon3:c.T521A:p.F174Y	.	het	.	2	122113149	122113149	G	T	het	114.64	14
2	122113165	122113165	G	A	exonic	Spg11	.	nonsynonymous SNV	Spg11:NM_145531:exon3:c.A505T:p.I169F	.	het	.	2	122113165	122113165	G	A	het	113.64	14
2	122125355	122125355	T	C	exonic	Patl2	.	nonsynonymous SNV	Patl2:NM_026251:exon10:c.C699G:p.D233E	.	het	.	2	122125355	122125355	T	C	het	139.64	11
2	122125359	122125359	G	A	exonic	Patl2	.	nonsynonymous SNV	Patl2:NM_026251:exon10:c.C695T:p.A232V	.	het	.	2	122125359	122125359	G	A	het	139.64	11
2	122128768	122128768	C	T	exonic	Patl2	.	nonsynonymous SNV	Patl2:NM_026251:exon5:c.G214A:p.V72I	.	het	.	2	122128768	122128768	C	T	het	253.64	25
2	122128820	122128820	T	G	exonic	Patl2	.	nonsynonymous SNV	Patl2:NM_026251:exon5:c.A162C:p.E54D	.	het	.	2	122128820	122128820	T	G	het	312.64	30
2	122128831	122128831	T	G	exonic	Patl2	.	nonsynonymous SNV	Patl2:NM_026251:exon5:c.G151C:p.V51L	.	het	.	2	122128831	122128831	T	G	het	268.64	25
2	122128839	122128839	G	A	exonic	Patl2	.	nonsynonymous SNV	Patl2:NM_026251:exon5:c.C143T:p.A48V	.	het	.	2	122128839	122128839	G	A	het	295.64	31
2	122128962	122128962	G	C	exonic	Patl2	.	nonsynonymous SNV	Patl2:NM_026251:exon5:c.T20G:p.L7R	.	het	.	2	122128962	122128962	G	C	het	149.64	32
2	122167636	122167636	G	C	exonic	Trim69	.	nonsynonymous SNV	Trim69:NM_001379369:exon2:c.A34C:p.K12Q,Trim69:NM_080510:exon2:c.A88C:p.K30Q	.	het	.	2	122167636	122167636	G	C	het	49.64	11
2	122167673	122167673	0	T	exonic	Trim69	.	nonsynonymous SNV	Trim69:NM_001379369:exon2:c.G71T:p.C24F,Trim69:NM_080510:exon2:c.G125T:p.C42F	.	het	.	2	122167673	122167673	-	T	het	124.60	18
2	122178796	122178796	T	A	exonic	Trim69	.	nonsynonymous SNV	Trim69:NM_001379369:exon7:c.T1282A:p.Y428N,Trim69:NM_080510:exon7:c.T1336A:p.Y446N	.	het	.	2	122178796	122178796	T	A	het	183.64	18
2	125595022	125595022	A	G	exonic	Cep152	.	nonsynonymous SNV	Cep152:NM_001081091:exon13:c.A1597C:p.I533L	.	het	.	2	125595022	125595022	A	G	het	45.64	11
2	126433894	126433894	C	G	exonic	Atp8b4	.	nonsynonymous SNV	Atp8b4:NM_001080944:exon7:c.A417C:p.L139F,Atp8b4:NM_001359975:exon7:c.A417C:p.L139F	.	het	.	2	126433894	126433894	C	G	het	147.64	15
2	126586266	126586266	A	G	exonic	Slc27a2	.	nonsynonymous SNV	Slc27a2:NM_011978:exon9:c.A1570G:p.I524V	.	het	.	2	126586266	126586266	A	G	het	46.64	12
2	127208980	127208980	C	T	exonic	Snrnp200	.	nonsynonymous SNV	Snrnp200:NM_177214:exon2:c.A52T:p.N18Y	.	het	.	2	127208980	127208980	C	T	het	82.64	15
2	127208987	127208987	G	A	exonic	Snrnp200	.	nonsynonymous SNV	Snrnp200:NM_177214:exon2:c.T59A:p.V20E	.	het	.	2	127208987	127208987	G	A	het	79.64	16
2	127209041	127209041	C	A	exonic	Snrnp200	.	nonsynonymous SNV	Snrnp200:NM_177214:exon2:c.G113A:p.G38E	.	het	.	2	127209041	127209041	C	A	het	78.64	12
2	127210768	127210768	T	C	exonic	Snrnp200	.	nonsynonymous SNV	Snrnp200:NM_177214:exon3:c.A284C:p.D95A	.	het	.	2	127210768	127210768	T	C	het	72.64	15
2	127214863	127214863	G	T	exonic	Snrnp200	.	nonsynonymous SNV	Snrnp200:NM_177214:exon6:c.G687T:p.M229I	.	het	.	2	127214863	127214863	G	T	het	77.64	11
2	127217541	127217541	G	T	exonic	Snrnp200	.	nonsynonymous SNV	Snrnp200:NM_177214:exon11:c.G1353T:p.K451N	.	het	.	2	127217541	127217541	G	T	het	172.64	15
2	127218009	127218009	C	T	exonic	Snrnp200	.	nonsynonymous SNV	Snrnp200:NM_177214:exon12:c.C1514T:p.T505I	.	het	.	2	127218009	127218009	C	T	het	78.64	19
2	127219115	127219115	T	G	exonic	Snrnp200	.	nonsynonymous SNV	Snrnp200:NM_177214:exon14:c.C1758G:p.I586M	.	het	.	2	127219115	127219115	T	G	het	76.64	17
2	127219116	127219116	T	C	exonic	Snrnp200	.	nonsynonymous SNV	Snrnp200:NM_177214:exon14:c.G1759C:p.V587L	.	het	.	2	127219116	127219116	T	C	het	76.64	17
2	127226137	127226137	T	C	exonic	Snrnp200	.	nonsynonymous SNV	Snrnp200:NM_177214:exon19:c.G2553C:p.Q851H	.	het	.	2	127226137	127226137	T	C	het	87.64	12
2	127230012	127230012	G	A	exonic	Snrnp200	.	nonsynonymous SNV	Snrnp200:NM_177214:exon27:c.T3611A:p.I1204N	.	het	.	2	127230012	127230012	G	A	het	54.64	23
2	127230040	127230040	C	T	exonic	Snrnp200	.	nonsynonymous SNV	Snrnp200:NM_177214:exon27:c.G3639T:p.K1213N	.	het	.	2	127230040	127230040	C	T	het	109.64	21
2	127230192	127230192	A	G	exonic	Snrnp200	.	nonsynonymous SNV	Snrnp200:NM_177214:exon28:c.T3698G:p.I1233S	.	het	.	2	127230192	127230192	A	G	het	45.64	23
2	127230607	127230607	C	T	exonic	Snrnp200	.	nonsynonymous SNV	Snrnp200:NM_177214:exon29:c.C3923T:p.P1308L	.	het	.	2	127230607	127230607	C	T	het	87.64	12
2	127236871	127236871	T	C	exonic	Snrnp200	.	nonsynonymous SNV	Snrnp200:NM_177214:exon38:c.G5455C:p.A1819P	.	het	.	2	127236871	127236871	T	C	het	109.64	19
2	127242912	127242912	0	G	exonic	Ciao1	.	nonsynonymous SNV	Ciao1:NM_025296:exon7:c.A905C:p.H302P	.	het	.	2	127242912	127242912	-	G	het	119.60	21
2	127242925	127242925	G	A	exonic	Ciao1	.	nonsynonymous SNV	Ciao1:NM_025296:exon7:c.C892T:p.L298F	.	het	.	2	127242925	127242925	G	A	het	163.64	21
2	127248648	127248648	G	T	exonic	Tmem127	.	nonsynonymous SNV	Tmem127:NM_175145:exon2:c.A83T:p.E28V	.	het	.	2	127248648	127248648	G	T	het	159.64	18
2	127270818	127270818	T	C	exonic	Stard7	.	nonsynonymous SNV	Stard7:NM_001362684:exon1:c.G237C:p.M79I,Stard7:NM_139308:exon1:c.G237C:p.M79I	.	het	.	2	127270818	127270818	T	C	het	34.64	13
2	127292187	127292187	C	T	exonic	Stard7	.	nonsynonymous SNV	Stard7:NM_139308:exon6:c.G789T:p.E263D	.	het	.	2	127292187	127292187	C	T	het	52.64	10
2	127342426	127342426	T	A	exonic	Astl	.	nonsynonymous SNV	Astl:NM_001291003:exon2:c.C131A:p.P44H,Astl:NM_172539:exon2:c.C68A:p.P23H	.	het	.	2	127342426	127342426	T	A	het	118.64	12
2	127347249	127347249	A	G	exonic	Astl	.	nonsynonymous SNV	Astl:NM_001291003:exon6:c.A557G:p.H186R,Astl:NM_172539:exon6:c.A494G:p.H165R	.	het	.	2	127347249	127347249	A	G	het	392.64	17
2	127350528	127350528	A	G	exonic	Astl	.	nonsynonymous SNV	Astl:NM_001291003:exon8:c.C790G:p.R264G,Astl:NM_172539:exon8:c.C727G:p.R243G	.	het	.	2	127350528	127350528	A	G	het	154.64	26
2	127350592	127350592	A	C	exonic	Astl	.	nonsynonymous SNV	Astl:NM_001291003:exon8:c.T854C:p.V285A,Astl:NM_172539:exon8:c.T791C:p.V264A	.	het	.	2	127350592	127350592	A	C	het	139.64	22
2	127363703	127363703	C	A	exonic	Adra2b	.	nonsynonymous SNV	Adra2b:NM_009633:exon1:c.T124A:p.S42T	.	het	.	2	127363703	127363703	C	A	het	101.64	18
2	127363733	127363733	C	T	exonic	Adra2b	.	nonsynonymous SNV	Adra2b:NM_009633:exon1:c.G154T:p.V52L	.	het	.	2	127363733	127363733	C	T	het	101.64	18
2	127363985	127363985	A	T	exonic	Adra2b	.	nonsynonymous SNV	Adra2b:NM_009633:exon1:c.G406T:p.V136L	.	het	.	2	127363985	127363985	A	T	het	181.64	19
2	127364768	127364768	0	G	exonic	Adra2b	.	nonsynonymous SNV	Adra2b:NM_009633:exon1:c.C1189G:p.Q397E	.	het	.	2	127364768	127364768	-	G	het	112.60	16
2	127770331	127770331	A	G	exonic	Nphp1	.	nonsynonymous SNV	Nphp1:NM_001291012:exon7:c.A695C:p.D232A,Nphp1:NM_001291013:exon7:c.A695C:p.D232A,Nphp1:NM_001355429:exon7:c.A695C:p.D232A,Nphp1:NM_001369236:exon7:c.A695C:p.D232A,Nphp1:NM_016902:exon7:c.A695C:p.D232A	.	het	.	2	127770331	127770331	A	G	het	90.64	11
2	128010115	128010115	A	G	exonic	Acoxl	.	nonsynonymous SNV	Acoxl:NM_028765:exon12:c.T1176G:p.C392W	.	het	.	2	128010115	128010115	A	G	het	107.64	19
2	128010159	128010159	A	G	exonic	Acoxl	.	nonsynonymous SNV	Acoxl:NM_028765:exon12:c.T1220G:p.M407R	.	het	.	2	128010159	128010159	A	G	het	136.64	20
2	128967813	128967813	A	G	exonic	Zc3h6	.	nonsynonymous SNV	Zc3h6:NM_178404:exon1:c.C9G:p.D3E	.	het	.	2	128967813	128967813	A	G	het	106.64	13
2	129463661	129463661	T	G	exonic	F830045P16Rik	.	nonsynonymous SNV	F830045P16Rik:NM_001379444:exon4:c.G792C:p.L264F,F830045P16Rik:NM_177653:exon4:c.G792C:p.L264F	.	het	.	2	129463661	129463661	T	G	het	254.64	18
2	130202071	130202071	C	A	exonic	Tmc2	.	nonsynonymous SNV	Tmc2:NM_138655:exon3:c.T224A:p.V75E	.	het	.	2	130202071	130202071	C	A	het	172.64	20
2	130240250	130240250	A	T	exonic	Tmc2	.	nonsynonymous SNV	Tmc2:NM_138655:exon11:c.G1352T:p.R451M	.	het	.	2	130240250	130240250	A	T	het	75.64	19
2	131144865	131144865	A	G	exonic	Hspa12b	.	nonsynonymous SNV	Hspa12b:NM_028306:exon13:c.T1705G:p.W569G	.	het	.	2	131144865	131144865	A	G	het	34.64	16
2	131144908	131144908	T	G	exonic	Hspa12b	.	nonsynonymous SNV	Hspa12b:NM_028306:exon13:c.C1748G:p.S583W	.	het	.	2	131144908	131144908	T	G	het	28.64	18
2	143801077	143801077	0	T	exonic	Pcsk2	.	nonsynonymous SNV	Pcsk2:NM_008792:exon11:c.G1273T:p.V425F	.	het	.	2	143801077	143801077	-	T	het	42.60	10
2	143955157	143955157	G	A	exonic	Rrbp1	.	nonsynonymous SNV	Rrbp1:NM_024281:exon13:c.C3374T:p.T1125I	.	het	.	2	143955157	143955157	G	A	het	142.64	10
2	144369128	144369128	C	T	exonic	Pet117	.	nonsynonymous SNV	Pet117:NM_001164813:exon1:c.G67T:p.V23L	.	het	.	2	144369128	144369128	C	T	het	107.64	16
2	144583741	144583741	G	T	exonic	Sec23b	.	nonsynonymous SNV	Sec23b:NM_001281816:exon12:c.G1260T:p.L420F,Sec23b:NM_001252543:exon15:c.G1716T:p.L572F,Sec23b:NM_001252544:exon15:c.G1716T:p.L572F,Sec23b:NM_001252545:exon15:c.G1716T:p.L572F,Sec23b:NM_001355379:exon15:c.G1716T:p.L572F,Sec23b:NM_001355380:exon15:c.G1716T:p.L572F,Sec23b:NM_019787:exon15:c.G1716T:p.L572F	.	het	.	2	144583741	144583741	G	T	het	122.64	11
2	144823848	144823848	C	T	exonic	Scp2d1	.	nonsynonymous SNV	Scp2d1:NM_025490:exon1:c.G106T:p.A36S	.	het	.	2	144823848	144823848	C	T	het	54.64	20
2	144823999	144823999	G	A	exonic	Scp2d1	.	nonsynonymous SNV	Scp2d1:NM_025490:exon1:c.T257A:p.I86N	.	het	.	2	144823999	144823999	G	A	het	141.64	21
2	144824085	144824085	T	C	exonic	Scp2d1	.	nonsynonymous SNV	Scp2d1:NM_025490:exon1:c.T343C:p.F115L	.	het	.	2	144824085	144824085	T	C	het	188.64	18
2	144824110	144824110	A	C	exonic	Scp2d1	.	nonsynonymous SNV	Scp2d1:NM_025490:exon1:c.T368C:p.I123T	.	het	.	2	144824110	144824110	A	C	het	116.64	13
2	145518457	145518457	A	G	exonic	Slc24a3	.	nonsynonymous SNV	Slc24a3:NM_001356497:exon5:c.C476G:p.S159W,Slc24a3:NM_053195:exon5:c.C326G:p.S109W	.	het	.	2	145518457	145518457	A	G	het	94.64	11
2	150813464	150813464	T	C	exonic	Pygb	.	nonsynonymous SNV	Pygb:NM_153781:exon6:c.G734C:p.W245S	.	het	.	2	150813464	150813464	T	C	het	185.64	20
2	150815129	150815129	T	C	exonic	Pygb	.	nonsynonymous SNV	Pygb:NM_153781:exon8:c.G999C:p.K333N	.	het	.	2	150815129	150815129	T	C	het	27.64	15
2	150839817	150839817	A	C	exonic	Abhd12	.	nonsynonymous SNV	Abhd12:NM_024465:exon7:c.C652G:p.R218G,Abhd12:NM_001356549:exon8:c.C181G:p.R61G	.	het	.	2	150839817	150839817	A	C	het	29.64	15
2	151720859	151720859	G	A	exonic	Psmf1	.	nonsynonymous SNV	Psmf1:NM_001305244:exon3:c.C227T:p.P76L,Psmf1:NM_212446:exon5:c.C569T:p.P190L	.	het	.	2	151720859	151720859	G	A	het	40.64	14
2	151741072	151741072	T	G	exonic	Psmf1	.	nonsynonymous SNV	Psmf1:NM_212446:exon1:c.T68C:p.V23A	.	het	.	2	151741072	151741072	T	G	het	84.64	16
2	151843104	151843104	G	A	exonic	Rspo4	.	nonsynonymous SNV	Rspo4:NM_001040689:exon1:c.C31A:p.L11I	.	het	.	2	151843104	151843104	G	A	het	65.64	18
2	151938990	151938990	T	C	exonic	Angpt4	.	nonsynonymous SNV	Angpt4:NM_009641:exon7:c.T1157C:p.V386A	.	het	.	2	151938990	151938990	T	C	het	52.64	10
2	152479492	152479492	T	C	exonic	Defb20	.	nonsynonymous SNV	Defb20:NM_176950:exon2:c.A188C:p.K63T	.	het	.	2	152479492	152479492	T	C	het	268.64	12
2	152479511	152479511	T	C	exonic	Defb20	.	nonsynonymous SNV	Defb20:NM_176950:exon2:c.G207C:p.E69D	.	het	.	2	152479511	152479511	T	C	het	296.64	13
2	152518276	152518276	0	G	exonic	Defb28	.	nonsynonymous SNV	Defb28:NM_001037502:exon1:c.A10G:p.T4A	.	het	.	2	152518276	152518276	-	G	het	30.60	14
2	152538991	152538991	G	A	exonic	Defb29	.	nonsynonymous SNV	Defb29:NM_001001444:exon2:c.A97T:p.R33W	.	het	.	2	152538991	152538991	G	A	het	120.64	18
2	152893647	152893647	A	G	exonic	Tpx2	.	nonsynonymous SNV	Tpx2:NM_001141975:exon18:c.C2194G:p.L732V,Tpx2:NM_001141976:exon18:c.C2194G:p.L732V,Tpx2:NM_001141977:exon18:c.C2194G:p.L732V,Tpx2:NM_001141978:exon18:c.C2194G:p.L732V,Tpx2:NM_028109:exon18:c.C2194G:p.L732V	.	het	.	2	152893647	152893647	A	G	het	139.64	11
2	152912073	152912073	C	T	exonic	Mylk2	.	nonsynonymous SNV	Mylk2:NM_001081044:exon2:c.C86T:p.P29L	.	het	.	2	152912073	152912073	C	T	het	43.64	10
2	152920432	152920432	C	T	exonic	Mylk2	.	nonsynonymous SNV	Mylk2:NM_001081044:exon10:c.A1622T:p.D541V	.	het	.	2	152920432	152920432	C	T	het	101.64	21
2	152920538	152920538	A	G	exonic	Mylk2	.	nonsynonymous SNV	Mylk2:NM_001081044:exon11:c.A1646G:p.E549G	.	het	.	2	152920538	152920538	A	G	het	103.64	23
2	152932349	152932349	T	C	exonic	Foxs1	.	nonsynonymous SNV	Foxs1:NM_010226:exon1:c.C783G:p.D261E	.	het	.	2	152932349	152932349	T	C	het	78.64	12
2	152932443	152932443	T	C	exonic	Foxs1	.	nonsynonymous SNV	Foxs1:NM_010226:exon1:c.T689G:p.L230R	.	het	.	2	152932443	152932443	T	C	het	142.64	18
2	152932827	152932827	G	C	exonic	Foxs1	.	nonsynonymous SNV	Foxs1:NM_010226:exon1:c.T305G:p.F102C	.	het	.	2	152932827	152932827	G	C	het	126.64	21
2	152932894	152932894	C	T	exonic	Foxs1	.	nonsynonymous SNV	Foxs1:NM_010226:exon1:c.C238A:p.P80T	.	het	.	2	152932894	152932894	C	T	het	101.64	21
2	152932945	152932945	C	T	exonic	Foxs1	.	nonsynonymous SNV	Foxs1:NM_010226:exon1:c.C187A:p.Q63K	.	het	.	2	152932945	152932945	C	T	het	80.64	20
2	152933076	152933076	C	A	exonic	Foxs1	.	nonsynonymous SNV	Foxs1:NM_010226:exon1:c.C56T:p.P19L	.	het	.	2	152933076	152933076	C	A	het	22.64	14
2	153397754	153397754	T	C	exonic	Asxl1	.	nonsynonymous SNV	Asxl1:NM_001039939:exon11:c.A1464C:p.Q488H	.	het	.	2	153397754	153397754	T	C	het	210.64	24
2	153401237	153401237	A	G	exonic	Asxl1	.	nonsynonymous SNV	Asxl1:NM_001039939:exon12:c.C3709G:p.H1237D	.	het	.	2	153401237	153401237	A	G	het	116.64	16
2	153401535	153401535	G	A	exonic	Asxl1	.	nonsynonymous SNV	Asxl1:NM_001039939:exon12:c.C4007A:p.S1336Y	.	het	.	2	153401535	153401535	G	A	het	249.64	23
2	153764988	153764988	C	T	exonic	Mapre1	.	nonsynonymous SNV	Mapre1:NM_007896:exon6:c.G639T:p.E213D	.	het	.	2	153764988	153764988	C	T	het	136.64	20
2	153783746	153783746	G	A	exonic	Efcab8	.	nonsynonymous SNV	Efcab8:NM_001370916:exon5:c.T325A:p.S109T	.	het	.	2	153783746	153783746	G	A	het	107.64	16
2	153789175	153789175	T	C	exonic	Efcab8	.	nonsynonymous SNV	Efcab8:NM_001370916:exon7:c.T524C:p.M175T	.	het	.	2	153789175	153789175	T	C	het	89.64	20
2	153865327	153865327	A	G	exonic	Sun5	.	nonsynonymous SNV	Sun5:NM_029599:exon7:c.A430C:p.K144Q,Sun5:NM_001305048:exon8:c.A505C:p.K169Q	.	het	.	2	153865327	153865327	A	G	het	46.64	12
2	153986390	153986390	T	C	exonic	Bpifa6	.	nonsynonymous SNV	Bpifa6:NM_001080811:exon4:c.G415C:p.G139R	.	het	.	2	153986390	153986390	T	C	het	31.64	14
2	153986417	153986417	C	T	exonic	Bpifa6	.	nonsynonymous SNV	Bpifa6:NM_001080811:exon4:c.A442T:p.N148Y	.	het	.	2	153986417	153986417	C	T	het	85.64	14
2	153986468	153986468	A	G	exonic	Bpifa6	.	nonsynonymous SNV	Bpifa6:NM_001080811:exon4:c.A493G:p.K165E	.	het	.	2	153986468	153986468	A	G	het	51.64	18
2	153986557	153986557	G	A	exonic	Bpifa6	.	nonsynonymous SNV	Bpifa6:NM_001080811:exon4:c.C582A:p.S194R	.	het	.	2	153986557	153986557	G	A	het	30.64	16
2	154262059	154262059	T	C	exonic	Bpifb9a	.	nonsynonymous SNV	Bpifb9a:NM_175167:exon3:c.G421C:p.G141R	.	het	.	2	154262059	154262059	T	C	het	104.64	17
2	154263378	154263378	G	A	exonic	Bpifb9a	.	nonsynonymous SNV	Bpifb9a:NM_175167:exon5:c.C894A:p.S298R	.	het	.	2	154263378	154263378	G	A	het	103.64	12
2	154377050	154377050	C	A	exonic	Snta1	.	nonsynonymous SNV	Snta1:NM_009228:exon7:c.C1364T:p.T455M	.	het	.	2	154377050	154377050	C	A	het	79.64	24
2	154555602	154555602	C	T	exonic	Necab3	.	nonsynonymous SNV	Necab3:NM_001379147:exon3:c.T218A:p.I73N,Necab3:NM_001379148:exon3:c.T218A:p.I73N,Necab3:NM_021546:exon3:c.T218A:p.I73N,Necab3:NM_001379149:exon4:c.T125A:p.I42N	.	het	.	2	154555602	154555602	C	T	het	133.64	13
2	155415508	155415508	C	T	exonic	Ncoa6	.	nonsynonymous SNV	Ncoa6:NM_001242558:exon8:c.T2114A:p.M705K,Ncoa6:NM_019825:exon8:c.T2114A:p.M705K	.	het	.	2	155415508	155415508	C	T	het	52.64	10
2	155422840	155422840	G	A	exonic	Ncoa6	.	nonsynonymous SNV	Ncoa6:NM_001242558:exon5:c.C614T:p.P205L,Ncoa6:NM_019825:exon5:c.C614T:p.P205L	.	het	.	2	155422840	155422840	G	A	het	31.64	17
2	155633003	155633003	T	C	exonic	Myh7b	.	nonsynonymous SNV	Myh7b:NM_001085378:exon38:c.G5460C:p.Q1820H	.	het	.	2	155633003	155633003	T	C	het	143.64	25
2	155635431	155635431	C	T	exonic	Trpc4ap	.	nonsynonymous SNV	Trpc4ap:NM_001163452:exon18:c.C2061A:p.S687R,Trpc4ap:NM_019828:exon18:c.C2037A:p.S679R	.	het	.	2	155635431	155635431	C	T	het	46.64	12
2	155807547	155807547	T	C	exonic	Mmp24	.	nonsynonymous SNV	Mmp24:NM_010808:exon5:c.A883C:p.I295L	.	het	.	2	155807547	155807547	T	C	het	67.64	20
2	155812266	155812266	A	G	exonic	Mmp24	.	nonsynonymous SNV	Mmp24:NM_010808:exon7:c.C1163G:p.P388R	.	het	.	2	155812266	155812266	A	G	het	148.64	23
2	155830144	155830144	G	A	exonic	Fam83c	.	nonsynonymous SNV	Fam83c:NM_027788:exon4:c.C1232T:p.S411F	.	het	.	2	155830144	155830144	G	A	het	60.64	21
2	155831556	155831556	G	A	exonic	Fam83c	.	nonsynonymous SNV	Fam83c:NM_027788:exon2:c.G573T:p.Q191H	.	het	.	2	155831556	155831556	G	A	het	88.64	24
2	155831597	155831597	C	T	exonic	Fam83c	.	nonsynonymous SNV	Fam83c:NM_027788:exon2:c.T532A:p.S178T	.	het	.	2	155831597	155831597	C	T	het	61.64	22
2	155834257	155834257	A	G	exonic	Fam83c	.	nonsynonymous SNV	Fam83c:NM_027788:exon1:c.A454C:p.S152R	.	het	.	2	155834257	155834257	A	G	het	54.64	20
2	155834391	155834391	A	G	exonic	Fam83c	.	nonsynonymous SNV	Fam83c:NM_027788:exon1:c.A320C:p.D107A	.	het	.	2	155834391	155834391	A	G	het	85.64	13
2	155834452	155834452	C	A	exonic	Fam83c	.	nonsynonymous SNV	Fam83c:NM_027788:exon1:c.G259T:p.G87C	.	het	.	2	155834452	155834452	C	A	het	133.64	21
2	155834487	155834487	G	A	exonic	Fam83c	.	nonsynonymous SNV	Fam83c:NM_027788:exon1:c.C224T:p.P75L	.	het	.	2	155834487	155834487	G	A	het	88.64	21
2	155887146	155887146	A	T	exonic	Uqcc1	.	nonsynonymous SNV	Uqcc1:NM_001355441:exon7:c.T239A:p.M80K,Uqcc1:NM_001355442:exon7:c.T239A:p.M80K,Uqcc1:NM_001355443:exon7:c.T584A:p.M195K,Uqcc1:NM_018888:exon7:c.T524A:p.M175K	.	het	.	2	155887146	155887146	A	T	het	92.64	21
2	155887198	155887198	C	G	exonic	Uqcc1	.	nonsynonymous SNV	Uqcc1:NM_001355441:exon7:c.A187C:p.K63Q,Uqcc1:NM_001355442:exon7:c.A187C:p.K63Q,Uqcc1:NM_001355443:exon7:c.A532C:p.K178Q,Uqcc1:NM_018888:exon7:c.A472C:p.K158Q	.	het	.	2	155887198	155887198	C	G	het	133.64	21
2	155909362	155909362	0	T	exonic	Uqcc1	.	nonsynonymous SNV	Uqcc1:NM_001355441:exon5:c.T100A:p.F34I,Uqcc1:NM_001355442:exon5:c.T100A:p.F34I,Uqcc1:NM_001355443:exon5:c.T445A:p.F149I,Uqcc1:NM_018888:exon5:c.T385A:p.F129I	.	het	.	2	155909362	155909362	-	T	het	356.60	28
2	155985841	155985841	A	C	exonic	Cep250	.	nonsynonymous SNV	Cep250:NM_001129999:exon24:c.T3371C:p.V1124A,Cep250:NM_001130000:exon24:c.T3374C:p.V1125A,Cep250:NM_008383:exon25:c.T3311C:p.V1104A,Cep250:NM_177217:exon25:c.T3311C:p.V1104A	.	het	.	2	155985841	155985841	A	C	het	169.64	24
2	156045773	156045773	A	G	exonic	Fer1l4	.	nonsynonymous SNV	Fer1l4:NM_001136556:exon15:c.T1502C:p.F501S	.	het	.	2	156045773	156045773	A	G	het	52.64	10
2	156251862	156251862	T	C	exonic	Phf20	.	nonsynonymous SNV	Phf20:NM_172674:exon3:c.G170C:p.W57S	.	het	.	2	156251862	156251862	T	C	het	84.64	10
2	156287936	156287936	T	C	exonic	Phf20	.	nonsynonymous SNV	Phf20:NM_172674:exon10:c.T1427C:p.M476T	.	het	.	2	156287936	156287936	T	C	het	64.64	14
2	156311943	156311943	C	T	exonic	Scand1	.	nonsynonymous SNV	Scand1:NM_020255:exon2:c.G406A:p.A136T	.	het	.	2	156311943	156311943	C	T	het	71.64	13
2	156328373	156328373	T	A	exonic	Cnbd2	.	nonsynonymous SNV	Cnbd2:NM_001316755:exon3:c.T377A:p.F126Y,Cnbd2:NM_027585:exon3:c.T377A:p.F126Y	.	het	.	2	156328373	156328373	T	A	het	159.64	11
2	156335272	156335272	A	G	exonic	Cnbd2	.	nonsynonymous SNV	Cnbd2:NM_001316755:exon5:c.T536G:p.I179S,Cnbd2:NM_027585:exon5:c.T536G:p.I179S	.	het	.	2	156335272	156335272	A	G	het	67.64	20
2	156338607	156338607	T	C	exonic	Cnbd2	.	nonsynonymous SNV	Cnbd2:NM_001316755:exon6:c.G710C:p.G237A,Cnbd2:NM_027585:exon6:c.G710C:p.G237A	.	het	.	2	156338607	156338607	T	C	het	141.64	24
2	156338671	156338671	T	G	exonic	Cnbd2	.	nonsynonymous SNV	Cnbd2:NM_001316755:exon6:c.T774G:p.D258E,Cnbd2:NM_027585:exon6:c.T774G:p.D258E	.	het	.	2	156338671	156338671	T	G	het	33.64	30
2	156338699	156338699	G	A	exonic	Cnbd2	.	nonsynonymous SNV	Cnbd2:NM_001316755:exon6:c.C802A:p.P268T,Cnbd2:NM_027585:exon6:c.C802A:p.P268T	.	het	.	2	156338699	156338699	G	A	het	49.64	26
2	156375382	156375382	G	C	exonic	Cnbd2	.	nonsynonymous SNV	Cnbd2:NM_027585:exon13:c.T1790C:p.L597P	.	het	.	2	156375382	156375382	G	C	het	121.64	17
2	156494024	156494024	C	T	exonic	Epb41l1	.	nonsynonymous SNV	Epb41l1:NM_001006664:exon2:c.G107T:p.G36V,Epb41l1:NM_001368802:exon2:c.G107T:p.G36V,Epb41l1:NM_001368804:exon2:c.G107T:p.G36V,Epb41l1:NM_013510:exon2:c.G107T:p.G36V,Epb41l1:NM_001291120:exon3:c.G107T:p.G36V,Epb41l1:NM_001291121:exon3:c.G107T:p.G36V,Epb41l1:NM_001291122:exon3:c.G107T:p.G36V,Epb41l1:NM_001291123:exon3:c.G107T:p.G36V,Epb41l1:NM_001368800:exon3:c.G107T:p.G36V,Epb41l1:NM_001368801:exo…	.	het	.	2	156494024	156494024	C	T	het	80.64	25
2	156503825	156503825	T	C	exonic	Epb41l1	.	nonsynonymous SNV	Epb41l1:NM_001006664:exon7:c.G747C:p.E249D,Epb41l1:NM_001368802:exon7:c.G747C:p.E249D,Epb41l1:NM_001368804:exon7:c.G747C:p.E249D,Epb41l1:NM_013510:exon7:c.G747C:p.E249D,Epb41l1:NM_001291120:exon8:c.G747C:p.E249D,Epb41l1:NM_001291121:exon8:c.G747C:p.E249D,Epb41l1:NM_001291122:exon8:c.G747C:p.E249D,Epb41l1:NM_001291123:exon8:c.G747C:p.E249D,Epb41l1:NM_001368800:exon8:c.G747C:p.E249D,Epb41l1:NM_0013…	.	het	.	2	156503825	156503825	T	C	het	37.64	15
2	156503833	156503833	C	T	exonic	Epb41l1	.	nonsynonymous SNV	Epb41l1:NM_001006664:exon7:c.A755T:p.E252V,Epb41l1:NM_001368802:exon7:c.A755T:p.E252V,Epb41l1:NM_001368804:exon7:c.A755T:p.E252V,Epb41l1:NM_013510:exon7:c.A755T:p.E252V,Epb41l1:NM_001291120:exon8:c.A755T:p.E252V,Epb41l1:NM_001291121:exon8:c.A755T:p.E252V,Epb41l1:NM_001291122:exon8:c.A755T:p.E252V,Epb41l1:NM_001291123:exon8:c.A755T:p.E252V,Epb41l1:NM_001368800:exon8:c.A755T:p.E252V,Epb41l1:NM_0013…	.	het	.	2	156503833	156503833	C	T	het	74.64	16
2	156521593	156521593	T	C	exonic	Epb41l1	.	nonsynonymous SNV	Epb41l1:NM_001368800:exon16:c.G2021C:p.R674P	.	het	.	2	156521593	156521593	T	C	het	33.64	13
2	156521641	156521641	T	C	exonic	Epb41l1	.	nonsynonymous SNV	Epb41l1:NM_001368800:exon16:c.T2069C:p.L690P	.	het	.	2	156521641	156521641	T	C	het	34.64	13
2	156521744	156521744	G	A	exonic	Epb41l1	.	nonsynonymous SNV	Epb41l1:NM_001368800:exon16:c.C2172A:p.F724L	.	het	.	2	156521744	156521744	G	A	het	52.64	10
2	156523661	156523661	C	T	exonic	Epb41l1	.	nonsynonymous SNV	Epb41l1:NM_001368800:exon17:c.A3589T:p.S1197C	.	het	.	2	156523661	156523661	C	T	het	55.64	24
2	156551035	156551035	C	A	exonic	Aar2	.	nonsynonymous SNV	Aar2:NM_026661:exon2:c.C343A:p.L115I,Aar2:NM_001164818:exon3:c.C343A:p.L115I	.	het	.	2	156551035	156551035	C	A	het	112.64	13
2	156551038	156551038	A	G	exonic	Aar2	.	nonsynonymous SNV	Aar2:NM_026661:exon2:c.C346G:p.P116A,Aar2:NM_001164818:exon3:c.C346G:p.P116A	.	het	.	2	156551038	156551038	A	G	het	112.64	13
2	156566871	156566871	A	G	exonic	Aar2	.	nonsynonymous SNV	Aar2:NM_026661:exon4:c.T994G:p.F332V,Aar2:NM_001164818:exon5:c.T994G:p.F332V	.	het	.	2	156566871	156566871	A	G	het	169.64	35
2	156865275	156865275	T	C	exonic	Rab5if	.	nonsynonymous SNV	Rab5if:NM_026124:exon2:c.A133C:p.I45L	.	het	.	2	156865275	156865275	T	C	het	28.64	18
2	156865285	156865285	C	A	exonic	Rab5if	.	nonsynonymous SNV	Rab5if:NM_026124:exon2:c.T143A:p.F48Y	.	het	.	2	156865285	156865285	C	A	het	31.64	17
2	156874891	156874891	G	A	exonic	Sla2	.	nonsynonymous SNV	Sla2:NM_001356495:exon7:c.G648T:p.W216C,Sla2:NM_029983:exon7:c.G648T:p.W216C	.	het	.	2	156874891	156874891	G	A	het	31.64	14
2	156928715	156928715	A	G	exonic	Ndrg3	.	nonsynonymous SNV	Ndrg3:NM_001355392:exon16:c.G1113C:p.M371I,Ndrg3:NM_001355393:exon16:c.G1116C:p.M372I,Ndrg3:NM_001355394:exon16:c.G1032C:p.M344I,Ndrg3:NM_013865:exon16:c.G1113C:p.M371I,Ndrg3:NM_180956:exon17:c.G1152C:p.M384I,Ndrg3:NM_001355391:exon19:c.G1152C:p.M384I	.	het	.	2	156928715	156928715	A	G	het	57.64	22
2	156937541	156937541	T	C	exonic	Ndrg3	.	nonsynonymous SNV	Ndrg3:NM_001355393:exon10:c.C667G:p.L223V,Ndrg3:NM_001355394:exon10:c.C583G:p.L195V,Ndrg3:NM_001355392:exon11:c.C703G:p.L235V,Ndrg3:NM_013865:exon11:c.C703G:p.L235V,Ndrg3:NM_180956:exon11:c.C703G:p.L235V,Ndrg3:NM_001355391:exon13:c.C703G:p.L235V	.	het	.	2	156937541	156937541	T	C	het	160.64	24
2	157225573	157225573	C	T	exonic	Mroh8	.	nonsynonymous SNV	Mroh8:NM_001039557:exon14:c.T1865A:p.F622Y	.	het	.	2	157225573	157225573	C	T	het	68.64	13
2	157229984	157229984	T	C	exonic	Mroh8	.	nonsynonymous SNV	Mroh8:NM_001039557:exon12:c.C1600G:p.L534V	.	het	.	2	157229984	157229984	T	C	het	68.64	14
2	157230016	157230016	A	G	exonic	Mroh8	.	nonsynonymous SNV	Mroh8:NM_001039557:exon12:c.G1568C:p.S523T	.	het	.	2	157230016	157230016	A	G	het	158.64	14
2	157233121	157233121	A	G	exonic	Mroh8	.	nonsynonymous SNV	Mroh8:NM_001039557:exon11:c.A1454C:p.Q485P	.	het	.	2	157233121	157233121	A	G	het	108.64	20
2	157233128	157233128	A	G	exonic	Mroh8	.	nonsynonymous SNV	Mroh8:NM_001039557:exon11:c.A1447C:p.I483L	.	het	.	2	157233128	157233128	A	G	het	60.64	21
2	157279330	157279330	C	T	exonic	Mroh8;Rpn2	.	nonsynonymous SNV	Mroh8:NM_001039557:exon1:c.G146A:p.R49Q,Rpn2:NM_001355163:exon1:c.C8T:p.P3L,Rpn2:NM_019642:exon1:c.C8T:p.P3L	.	het	.	2	157279330	157279330	C	T	het	117.64	25
2	157294182	157294182	T	C	exonic	Rpn2	.	nonsynonymous SNV	Rpn2:NM_001355163:exon5:c.A509C:p.H170P,Rpn2:NM_001355164:exon5:c.A500C:p.H167P,Rpn2:NM_019642:exon5:c.A509C:p.H170P	.	het	.	2	157294182	157294182	T	C	het	141.64	17
2	157297410	157297410	A	C	exonic	Rpn2	.	nonsynonymous SNV	Rpn2:NM_001355163:exon7:c.T719C:p.I240T,Rpn2:NM_001355164:exon7:c.T710C:p.I237T,Rpn2:NM_001355165:exon7:c.T65C:p.I22T,Rpn2:NM_019642:exon7:c.T719C:p.I240T	.	het	.	2	157297410	157297410	A	C	het	147.64	19
2	157314931	157314931	T	C	exonic	Rpn2	.	nonsynonymous SNV	Rpn2:NM_001355163:exon12:c.A1453C:p.I485L,Rpn2:NM_001355164:exon12:c.A1444C:p.I482L,Rpn2:NM_001355165:exon12:c.A799C:p.I267L,Rpn2:NM_019642:exon12:c.A1453C:p.I485L	.	het	.	2	157314931	157314931	T	C	het	183.64	40
2	157320169	157320169	C	T	exonic	Rpn2	.	nonsynonymous SNV	Rpn2:NM_001355163:exon15:c.A1726T:p.T576S,Rpn2:NM_001355164:exon15:c.A1717T:p.T573S,Rpn2:NM_001355165:exon15:c.A1072T:p.T358S,Rpn2:NM_019642:exon15:c.A1726T:p.T576S	.	het	.	2	157320169	157320169	C	T	het	47.64	24
2	157321866	157321866	A	G	exonic	Rpn2	.	nonsynonymous SNV	Rpn2:NM_001355163:exon16:c.T1877G:p.V626G,Rpn2:NM_001355164:exon16:c.T1868G:p.V623G,Rpn2:NM_001355165:exon16:c.T1223G:p.V408G,Rpn2:NM_019642:exon16:c.T1877G:p.V626G	.	het	.	2	157321866	157321866	A	G	het	192.64	33
2	157558021	157558021	G	A	exonic	Blcap	.	nonsynonymous SNV	Blcap:NM_001355426:exon2:c.A133T:p.I45L,Blcap:NM_016916:exon2:c.A133T:p.I45L	.	het	.	2	157558021	157558021	G	A	het	96.64	21
2	158124310	158124310	T	C	exonic	Tgm2	.	nonsynonymous SNV	Tgm2:NM_009373:exon10:c.A1423G:p.M475V	.	het	.	2	158124310	158124310	T	C	het	45.64	22
2	158217627	158217627	G	A	exonic	D630003M21Rik	.	nonsynonymous SNV	D630003M21Rik:NM_001131021:exon3:c.C352T:p.H118Y,D630003M21Rik:NM_177657:exon3:c.C352T:p.H118Y	.	het	.	2	158217627	158217627	G	A	het	20.64	19
2	158444712	158444712	T	A	exonic	Ralgapb	.	nonsynonymous SNV	Ralgapb:NM_001291138:exon13:c.T2042A:p.M681K,Ralgapb:NM_001369183:exon13:c.T1328A:p.M443K,Ralgapb:NM_001291137:exon14:c.T2078A:p.M693K,Ralgapb:NM_001363006:exon14:c.T2078A:p.M693K	.	het	.	2	158444712	158444712	T	A	het	59.64	11
2	158466917	158466917	G	A	exonic	Ralgapb	.	nonsynonymous SNV	Ralgapb:NM_001291138:exon22:c.T3344A:p.F1115Y,Ralgapb:NM_001291137:exon23:c.T3380A:p.F1127Y,Ralgapb:NM_001363006:exon23:c.T3368A:p.F1123Y,Ralgapb:NM_001369183:exon23:c.T2639A:p.F880Y	.	het	.	2	158466917	158466917	G	A	het	31.64	17
2	158476124	158476124	C	T	exonic	Ralgapb	.	nonsynonymous SNV	Ralgapb:NM_001291138:exon24:c.C3551T:p.S1184F,Ralgapb:NM_001291137:exon25:c.C3587T:p.S1196F,Ralgapb:NM_001363006:exon25:c.C3575T:p.S1192F,Ralgapb:NM_001369183:exon25:c.C2846T:p.S949F	.	het	.	2	158476124	158476124	C	T	het	29.64	12
2	158614090	158614090	T	C	exonic	Slc32a1	.	nonsynonymous SNV	Slc32a1:NM_009508:exon2:c.G664C:p.V222L	.	het	.	2	158614090	158614090	T	C	het	106.64	22
2	158614094	158614094	A	G	exonic	Slc32a1	.	nonsynonymous SNV	Slc32a1:NM_009508:exon2:c.T668G:p.V223G	.	het	.	2	158614094	158614094	A	G	het	103.64	23
2	158614097	158614097	T	C	exonic	Slc32a1	.	nonsynonymous SNV	Slc32a1:NM_009508:exon2:c.T671C:p.V224A	.	het	.	2	158614097	158614097	T	C	het	106.64	22
2	158614114	158614114	G	A	exonic	Slc32a1	.	nonsynonymous SNV	Slc32a1:NM_009508:exon2:c.T688A:p.Y230N	.	het	.	2	158614114	158614114	G	A	het	22.64	20
2	158757216	158757216	T	C	exonic	Ppp1r16b	.	nonsynonymous SNV	Ppp1r16b:NM_001159662:exon10:c.G1107C:p.W369C,Ppp1r16b:NM_153089:exon10:c.G1107C:p.W369C	.	het	.	2	158757216	158757216	T	C	het	33.64	12
2	158757260	158757260	G	T	exonic	Ppp1r16b	.	nonsynonymous SNV	Ppp1r16b:NM_001159662:exon10:c.A1151T:p.N384I,Ppp1r16b:NM_153089:exon10:c.A1151T:p.N384I	.	het	.	2	158757260	158757260	G	T	het	31.64	14
2	160780030	160780030	G	A	exonic	Zhx3	.	nonsynonymous SNV	Zhx3:NM_177263:exon3:c.C2216T:p.P739L	.	het	.	2	160780030	160780030	G	A	het	48.64	25
2	160960257	160960257	G	C	exonic	Chd6	.	nonsynonymous SNV	Chd6:NM_173368:exon34:c.C6656G:p.S2219C	.	het	.	2	160960257	160960257	G	C	het	107.64	16
2	161560181	161560181	C	T	exonic	Ptprt	.	nonsynonymous SNV	Ptprt:NM_021464:exon21:c.C3069A:p.F1023L,Ptprt:NM_001291149:exon22:c.C3129A:p.F1043L,Ptprt:NM_001291150:exon22:c.C3099A:p.F1033L,Ptprt:NM_001291151:exon22:c.C3096A:p.F1032L	.	het	.	2	161560181	161560181	C	T	het	106.64	15
2	163072756	163072756	C	A	exonic	Mybl2	.	nonsynonymous SNV	Mybl2:NM_008652:exon7:c.G793A:p.V265M	.	het	.	2	163072756	163072756	C	A	het	68.64	11
2	163397163	163397163	T	C	exonic	Jph2	.	nonsynonymous SNV	Jph2:NM_021566:exon1:c.A364G:p.T122A,Jph2:NM_001205076:exon2:c.A364G:p.T122A	.	het	.	2	163397163	163397163	T	C	het	121.64	25
2	163397226	163397226	T	C	exonic	Jph2	.	nonsynonymous SNV	Jph2:NM_021566:exon1:c.A301G:p.N101D,Jph2:NM_001205076:exon2:c.A301G:p.N101D	.	het	.	2	163397226	163397226	T	C	het	277.64	25
2	163397253	163397253	A	G	exonic	Jph2	.	nonsynonymous SNV	Jph2:NM_021566:exon1:c.G274C:p.G92R,Jph2:NM_001205076:exon2:c.G274C:p.G92R	.	het	.	2	163397253	163397253	A	G	het	179.64	25
2	163721161	163721161	C	G	exonic	Pkig	.	nonsynonymous SNV	Pkig:NM_001164055:exon2:c.T11G:p.V4G,Pkig:NM_001039391:exon3:c.T11G:p.V4G,Pkig:NM_001164053:exon3:c.T11G:p.V4G,Pkig:NM_001277096:exon3:c.T11G:p.V4G,Pkig:NM_011106:exon3:c.T11G:p.V4G,Pkig:NM_001039390:exon4:c.T11G:p.V4G	.	het	.	2	163721161	163721161	C	G	het	107.64	18
2	163829061	163829061	G	C	exonic	Ccn5	.	nonsynonymous SNV	Ccn5:NM_016873:exon4:c.T487C:p.C163R	.	het	.	2	163829061	163829061	G	C	het	63.64	17
2	164025596	164025596	A	T	exonic	Pabpc1l	.	nonsynonymous SNV	Pabpc1l:NM_001114079:exon1:c.C116T:p.S39F	.	het	.	2	164025596	164025596	A	T	het	69.64	15
2	164255724	164255724	T	G	exonic	Svs3b	.	nonsynonymous SNV	Svs3b:NM_173377:exon2:c.G676C:p.V226L	.	het	.	2	164255724	164255724	T	G	het	130.64	29
2	164256207	164256207	G	T	exonic	Svs3b	.	nonsynonymous SNV	Svs3b:NM_173377:exon2:c.G193A:p.V65M	.	het	.	2	164256207	164256207	G	T	het	290.64	27
2	164393431	164393431	C	T	exonic	Matn4	.	nonsynonymous SNV	Matn4:NM_001252563:exon8:c.T1220A:p.V407E,Matn4:NM_013592:exon8:c.T1220A:p.V407E	.	het	.	2	164393431	164393431	C	T	het	136.64	20
2	164428952	164428952	C	T	exonic	Sdc4	.	nonsynonymous SNV	Sdc4:NM_011521:exon4:c.T386A:p.V129E	.	het	.	2	164428952	164428952	C	T	het	37.64	15
2	164464462	164464462	T	C	exonic	Sys1	.	nonsynonymous SNV	Sys1:NM_025575:exon4:c.G335C:p.R112P	.	het	.	2	164464462	164464462	T	C	het	93.64	10
2	164732037	164732037	A	G	exonic	Wfdc3	.	nonsynonymous SNV	Wfdc3:NM_027961:exon3:c.A347C:p.N116T	.	het	.	2	164732037	164732037	A	G	het	98.64	19
2	164765203	164765203	T	A	exonic	Dnttip1	.	nonsynonymous SNV	Dnttip1:NM_133763:exon11:c.C763A:p.H255N	.	het	.	2	164765203	164765203	T	A	het	151.64	27
2	164791827	164791827	T	C	exonic	Snx21	.	nonsynonymous SNV	Snx21:NM_133924:exon3:c.G532C:p.G178R	.	het	.	2	164791827	164791827	T	C	het	364.64	26
2	164791836	164791836	A	G	exonic	Snx21	.	nonsynonymous SNV	Snx21:NM_133924:exon3:c.T541G:p.S181A	.	het	.	2	164791836	164791836	A	G	het	406.64	27
2	164792158	164792158	C	T	exonic	Snx21	.	nonsynonymous SNV	Snx21:NM_133924:exon3:c.A863T:p.D288V	.	het	.	2	164792158	164792158	C	T	het	415.64	39
2	164792954	164792954	C	T	exonic	Acot8	.	nonsynonymous SNV	Acot8:NM_001362757:exon5:c.G655A:p.V219M,Acot8:NM_133240:exon6:c.G901A:p.V301M	.	het	.	2	164792954	164792954	C	T	het	191.64	17
2	164793009	164793009	A	G	exonic	Acot8	.	nonsynonymous SNV	Acot8:NM_001362756:exon6:c.T749C:p.V250A	.	het	.	2	164793009	164793009	A	G	het	212.64	19
2	164827590	164827590	G	A	exonic	Spata25	.	nonsynonymous SNV	Spata25:NM_029370:exon2:c.C500T:p.T167I	.	het	.	2	164827590	164827590	G	A	het	101.64	18
2	164846871	164846871	T	C	exonic	Pltp	.	nonsynonymous SNV	Pltp:NM_011125:exon9:c.A751G:p.R251G	.	het	.	2	164846871	164846871	T	C	het	115.64	12
2	164907656	164907656	G	A	exonic	Zfp335	.	nonsynonymous SNV	Zfp335:NM_199027:exon5:c.C820T:p.P274S	.	het	.	2	164907656	164907656	G	A	het	53.64	29
2	164948926	164948926	T	C	exonic	Mmp9	.	nonsynonymous SNV	Mmp9:NM_013599:exon2:c.A233C:p.Q78P	.	het	.	2	164948926	164948926	T	C	het	103.64	31
2	164950979	164950979	C	T	exonic	Mmp9	.	nonsynonymous SNV	Mmp9:NM_013599:exon7:c.G1152T:p.K384N	.	het	.	2	164950979	164950979	C	T	het	81.64	14
2	164992389	164992389	G	T	exonic	Slc12a5	.	nonsynonymous SNV	Slc12a5:NM_001355480:exon18:c.G2329T:p.V777L,Slc12a5:NM_001355481:exon18:c.G2329T:p.V777L,Slc12a5:NM_020333:exon18:c.G2260T:p.V754L	.	het	.	2	164992389	164992389	G	T	het	117.64	29
2	165069834	165069834	G	A	exonic	Cd40	.	nonsynonymous SNV	Cd40:NM_170702:exon7:c.C577A:p.P193T,Cd40:NM_170703:exon7:c.C602A:p.T201N,Cd40:NM_011611:exon8:c.C664A:p.P222T,Cd40:NM_170704:exon8:c.C659A:p.T220N	.	het	.	2	165069834	165069834	G	A	het	94.64	19
2	165070863	165070863	C	A	exonic	Cd40	.	nonsynonymous SNV	Cd40:NM_170702:exon8:c.G733A:p.V245M,Cd40:NM_011611:exon9:c.G820A:p.V274M	.	het	.	2	165070863	165070863	C	A	het	40.64	14
2	165123817	165123817	C	T	exonic	Cdh22	.	nonsynonymous SNV	Cdh22:NM_174988:exon9:c.T1441A:p.S481T	.	het	.	2	165123817	165123817	C	T	het	89.64	14
2	165309015	165309015	G	T	exonic	Elmo2	.	nonsynonymous SNV	Elmo2:NM_001302754:exon7:c.G569A:p.R190Q,Elmo2:NM_001302752:exon8:c.G575A:p.R192Q,Elmo2:NM_080287:exon8:c.G575A:p.R192Q,Elmo2:NM_207706:exon8:c.G575A:p.R192Q	.	het	.	2	165309015	165309015	G	T	het	43.64	10
2	165315657	165315657	A	G	exonic	Elmo2	.	nonsynonymous SNV	Elmo2:NM_001302754:exon3:c.G139C:p.E47Q,Elmo2:NM_001302752:exon4:c.G139C:p.E47Q,Elmo2:NM_080287:exon4:c.G139C:p.E47Q,Elmo2:NM_207706:exon4:c.G139C:p.E47Q	.	het	.	2	165315657	165315657	A	G	het	23.64	32
2	165771087	165771087	C	T	exonic	Eya2	.	nonsynonymous SNV	Eya2:NM_001271962:exon16:c.G1572T:p.R524S,Eya2:NM_001271963:exon16:c.G1572T:p.R524S,Eya2:NM_010165:exon16:c.G1572T:p.R524S	.	het	.	2	165771087	165771087	C	T	het	23.64	15
2	166585773	166585773	A	C	exonic	Prex1	.	nonsynonymous SNV	Prex1:NM_177782:exon24:c.C2958G:p.F986L	.	het	.	2	166585773	166585773	A	C	het	57.64	21
2	166585781	166585781	A	C	exonic	Prex1	.	nonsynonymous SNV	Prex1:NM_177782:exon24:c.A2950G:p.I984V	.	het	.	2	166585781	166585781	A	C	het	57.64	21
2	166585787	166585787	A	C	exonic	Prex1	.	nonsynonymous SNV	Prex1:NM_177782:exon24:c.T2944G:p.F982V	.	het	.	2	166585787	166585787	A	C	het	60.64	20
2	166585793	166585793	A	C	exonic	Prex1	.	nonsynonymous SNV	Prex1:NM_177782:exon24:c.A2938G:p.R980G	.	het	.	2	166585793	166585793	A	C	het	69.64	17
2	167609171	167609171	G	A	exonic	Ube2v1	.	nonsynonymous SNV	Ube2v1:NM_001311146:exon3:c.G248T:p.R83L,Ube2v1:NM_023230:exon4:c.G374T:p.R125L,Ube2v1:NM_001311131:exon5:c.G452T:p.R151L	.	het	.	2	167609171	167609171	G	A	het	102.64	32
2	168504814	168504814	T	C	exonic	Nfatc2	.	nonsynonymous SNV	Nfatc2:NM_001291171:exon8:c.C1009G:p.L337V,Nfatc2:NM_001291173:exon8:c.C1009G:p.L337V,Nfatc2:NM_001291176:exon8:c.C1009G:p.L337V,Nfatc2:NM_001291178:exon8:c.C1009G:p.L337V,Nfatc2:NM_001136073:exon9:c.C2359G:p.L787V,Nfatc2:NM_001291168:exon9:c.C2299G:p.L767V,Nfatc2:NM_001291169:exon9:c.C2299G:p.L767V,Nfatc2:NM_001291170:exon9:c.C1696G:p.L566V,Nfatc2:NM_001291174:exon9:c.C1696G:p.L566V,Nfatc2:NM_00…	.	het	.	2	168504814	168504814	T	C	het	34.64	13
2	168742088	168742088	A	G	exonic	Atp9a	.	nonsynonymous SNV	Atp9a:NM_001289446:exon1:c.G14C:p.G5A	.	het	.	2	168742088	168742088	A	G	het	78.64	12
2	168754560	168754560	C	G	exonic	Sall4	.	nonsynonymous SNV	Sall4:NM_175303:exon2:c.G2359C:p.D787H	.	het	.	2	168754560	168754560	C	G	het	179.64	30
2	168754811	168754811	C	T	exonic	Sall4	.	nonsynonymous SNV	Sall4:NM_175303:exon2:c.T2108A:p.V703D	.	het	.	2	168754811	168754811	C	T	het	161.64	28
2	170119171	170119171	G	A	exonic	Zfp217	.	nonsynonymous SNV	Zfp217:NM_001033299:exon2:c.A1235T:p.D412V,Zfp217:NM_001159683:exon3:c.A1235T:p.D412V	.	het	.	2	170119171	170119171	G	A	het	43.64	13
2	170119174	170119174	G	A	exonic	Zfp217	.	nonsynonymous SNV	Zfp217:NM_001033299:exon2:c.C1232T:p.T411I,Zfp217:NM_001159683:exon3:c.C1232T:p.T411I	.	het	.	2	170119174	170119174	G	A	het	43.64	13
2	172359866	172359866	T	C	exonic	Aurka	.	nonsynonymous SNV	Aurka:NM_001291185:exon7:c.A716G:p.H239R,Aurka:NM_011497:exon7:c.A782G:p.H261R	.	het	.	2	172359866	172359866	T	C	het	43.64	10
2	172551494	172551494	G	A	exonic	Tfap2c	.	nonsynonymous SNV	Tfap2c:NM_001159696:exon2:c.C253A:p.L85I,Tfap2c:NM_009335:exon2:c.C136A:p.L46I	.	het	.	2	172551494	172551494	G	A	het	69.64	18
2	172551512	172551512	C	T	exonic	Tfap2c	.	nonsynonymous SNV	Tfap2c:NM_001159696:exon2:c.G271T:p.A91S,Tfap2c:NM_009335:exon2:c.G154T:p.A52S	.	het	.	2	172551512	172551512	C	T	het	66.64	19
2	172551728	172551728	A	G	exonic	Tfap2c	.	nonsynonymous SNV	Tfap2c:NM_001159696:exon2:c.C487G:p.L163V,Tfap2c:NM_009335:exon2:c.C370G:p.L124V	.	het	.	2	172551728	172551728	A	G	het	40.54	11
2	172939753	172939753	A	G	exonic	Bmp7	.	nonsynonymous SNV	Bmp7:NM_007557:exon1:c.A317C:p.Y106S	.	het	.	2	172939753	172939753	A	G	het	24.64	20
2	174285325	174285325	T	C	exonic	Gnas	.	nonsynonymous SNV	Gnas:NM_019690:exon2:c.G652C:p.E218Q,Gnas:NM_022000:exon2:c.G652C:p.E218Q	.	het	.	2	174285325	174285325	T	C	het	49.64	10
2	174298308	174298308	T	A	exonic	Gnas	.	nonsynonymous SNV	Gnas:NM_201618:exon1:c.C269A:p.A90E	.	het	.	2	174298308	174298308	T	A	het	139.64	11
2	174457533	174457533	G	A	exonic	Tubb1	.	nonsynonymous SNV	Tubb1:NM_001080971:exon4:c.G1007A:p.R336K	.	het	.	2	174457533	174457533	G	A	het	84.64	10
2	174457689	174457689	A	G	exonic	Tubb1	.	nonsynonymous SNV	Tubb1:NM_001080971:exon4:c.T1163G:p.M388R	.	het	.	2	174457689	174457689	A	G	het	33.64	12
2	178332826	178332826	G	T	exonic	Phactr3	.	nonsynonymous SNV	Phactr3:NM_001007154:exon11:c.A1328T:p.N443I,Phactr3:NM_001177789:exon11:c.A1436T:p.N479I,Phactr3:NM_001177790:exon11:c.A1433T:p.N478I,Phactr3:NM_001177791:exon11:c.A1451T:p.N484I,Phactr3:NM_028806:exon11:c.A1448T:p.N483I	.	het	.	2	178332826	178332826	G	T	het	386.64	24
2	178350083	178350083	C	T	exonic	Sycp2	.	nonsynonymous SNV	Sycp2:NM_177191:exon38:c.C3970A:p.Q1324K	.	het	.	2	178350083	178350083	C	T	het	69.64	15
2	178352522	178352522	C	T	exonic	Sycp2	.	nonsynonymous SNV	Sycp2:NM_177191:exon35:c.G3608A:p.S1203N	.	het	.	2	178352522	178352522	C	T	het	91.64	12
2	178352523	178352523	A	G	exonic	Sycp2	.	nonsynonymous SNV	Sycp2:NM_177191:exon35:c.A3607C:p.S1203R	.	het	.	2	178352523	178352523	A	G	het	91.64	12
2	178477643	178477643	T	C	exonic	Cdh26	.	nonsynonymous SNV	Cdh26:NM_198656:exon13:c.G1954C:p.G652R	.	het	.	2	178477643	178477643	T	C	het	217.64	15
2	180039459	180039459	C	T	exonic	Psma7	.	nonsynonymous SNV	Psma7:NM_011969:exon2:c.C117A:p.D39E	.	het	.	2	180039459	180039459	C	T	het	130.64	14
2	180084203	180084203	T	A	exonic	Mtg2	.	nonsynonymous SNV	Mtg2:NM_001083329:exon6:c.C605A:p.P202H,Mtg2:NM_001083328:exon7:c.C605A:p.P202H,Mtg2:NM_028422:exon7:c.C605A:p.P202H,Mtg2:NM_181424:exon8:c.C605A:p.P202H	.	het	.	2	180084203	180084203	T	A	het	257.64	29
2	180085395	180085395	T	C	exonic	Mtg2	.	nonsynonymous SNV	Mtg2:NM_001083329:exon8:c.G839C:p.G280A,Mtg2:NM_001083328:exon9:c.G839C:p.G280A,Mtg2:NM_028422:exon9:c.G839C:p.G280A,Mtg2:NM_181424:exon10:c.G839C:p.G280A	.	het	.	2	180085395	180085395	T	C	het	103.64	16
2	180102820	180102820	A	T	exonic	Hrh3	.	nonsynonymous SNV	Hrh3:NM_133849:exon2:c.T326A:p.L109Q	.	het	.	2	180102820	180102820	A	T	het	200.64	12
2	180638650	180638650	0	G	exonic	Tcfl5	.	nonsynonymous SNV	Tcfl5:NM_001360335:exon4:c.A962C:p.E321A	.	het	.	2	180638650	180638650	-	G	het	96.60	18
2	181423544	181423544	0	A	exonic	Zbtb46	.	nonsynonymous SNV	Zbtb46:NM_027656:exon1:c.A812T:p.K271M,Zbtb46:NM_028125:exon2:c.A812T:p.K271M	.	het	.	2	181423544	181423544	-	A	het	60.60	10
3	8541886	8541886	C	T	exonic	Stmn2	.	nonsynonymous SNV	Stmn2:NM_025285:exon2:c.G65T:p.C22F	.	het	.	3	8541886	8541886	C	T	het	54.64	20
3	19217378	19217378	A	C	exonic	Mtfr1	.	nonsynonymous SNV	Mtfr1:NM_001253390:exon6:c.A713C:p.E238A,Mtfr1:NM_001253391:exon6:c.A713C:p.E238A,Mtfr1:NM_001356295:exon6:c.A713C:p.E238A,Mtfr1:NM_026182:exon6:c.A713C:p.E238A	.	het	.	3	19217378	19217378	A	C	het	31.64	12
3	28713761	28713761	T	G	exonic	Slc2a2	.	nonsynonymous SNV	Slc2a2:NM_031197:exon4:c.T437G:p.F146C	.	het	.	3	28713761	28713761	T	G	het	39.64	13
3	28713781	28713781	A	G	exonic	Slc2a2	.	nonsynonymous SNV	Slc2a2:NM_031197:exon4:c.A457G:p.I153V	.	het	.	3	28713781	28713781	A	G	het	37.64	14
3	32515304	32515304	A	C	exonic	Zfp639	.	nonsynonymous SNV	Zfp639:NM_001161818:exon4:c.T10C:p.Y4H,Zfp639:NM_001356625:exon4:c.T10C:p.Y4H,Zfp639:NM_144519:exon4:c.T10C:p.Y4H	.	het	.	3	32515304	32515304	A	C	het	155.64	15
3	32534249	32534249	A	G	exonic	Mfn1	.	nonsynonymous SNV	Mfn1:NM_024200:exon3:c.A124G:p.N42D	.	het	.	3	32534249	32534249	A	G	het	145.64	24
3	32847859	32847859	A	G	exonic	Usp13	.	nonsynonymous SNV	Usp13:NM_001013024:exon3:c.A338G:p.K113R	.	het	.	3	32847859	32847859	A	G	het	274.64	11
3	33800616	33800616	0	G	exonic	Ttc14	.	nonsynonymous SNV	Ttc14:NM_001290502:exon1:c.T91G:p.W31G	.	hom	.	3	33800616	33800616	-	G	hom	316.02	10
3	34047638	34047638	T	C	exonic	Fxr1	.	nonsynonymous SNV	Fxr1:NM_001113188:exon7:c.A520C:p.S174R,Fxr1:NM_001113189:exon7:c.A520C:p.S174R,Fxr1:NM_008053:exon7:c.A520C:p.S174R	.	hom	.	3	34047638	34047638	T	C	hom	384.06	10
3	34050127	34050127	A	C	exonic	Fxr1	.	nonsynonymous SNV	Fxr1:NM_001113188:exon9:c.T854C:p.F285S,Fxr1:NM_001113189:exon9:c.T854C:p.F285S,Fxr1:NM_008053:exon9:c.T854C:p.F285S	.	hom	.	3	34050127	34050127	A	C	hom	386.06	11
3	35795794	35795794	A	C	exonic	Atp11b	.	nonsynonymous SNV	Atp11b:NM_029570:exon8:c.A692C:p.E231A	.	hom	.	3	35795794	35795794	A	C	hom	330.06	10
3	35820085	35820085	G	A	exonic	Atp11b	.	nonsynonymous SNV	Atp11b:NM_029570:exon19:c.C2222A:p.A741D	.	het	.	3	35820085	35820085	G	A	het	93.64	10
3	36018903	36018903	C	T	exonic	Ccdc144b	.	nonsynonymous SNV	Ccdc144b:NM_178418:exon9:c.T1229A:p.M410K	.	het	.	3	36018903	36018903	C	T	het	368.64	17
3	36019024	36019024	C	T	exonic	Ccdc144b	.	nonsynonymous SNV	Ccdc144b:NM_178418:exon9:c.C1108A:p.L370I	.	het	.	3	36019024	36019024	C	T	het	631.64	23
3	36180083	36180083	G	A	exonic	Qrfpr	.	nonsynonymous SNV	Qrfpr:NM_198192:exon6:c.A1108T:p.M370L	.	het	.	3	36180083	36180083	G	A	het	242.64	12
3	36521297	36521297	A	G	exonic	Smim43	.	nonsynonymous SNV	Smim43:NM_001384269:exon1:c.T95C:p.L32P	.	het	.	3	36521297	36521297	A	G	het	445.64	14
3	36521333	36521333	A	G	exonic	Smim43	.	nonsynonymous SNV	Smim43:NM_001384269:exon1:c.T59C:p.L20P	.	het	.	3	36521333	36521333	A	G	het	290.64	11
3	36575778	36575778	T	C	exonic	Bbs7	.	nonsynonymous SNV	Bbs7:NM_027810:exon16:c.C1751G:p.A584G	.	het	.	3	36575778	36575778	T	C	het	63.64	17
3	36575823	36575823	A	G	exonic	Bbs7	.	nonsynonymous SNV	Bbs7:NM_027810:exon16:c.A1706C:p.N569T	.	hom	.	3	36575823	36575823	A	G	hom	562.06	15
3	36575850	36575850	G	A	exonic	Bbs7	.	nonsynonymous SNV	Bbs7:NM_027810:exon16:c.A1679T:p.K560I	.	het	.	3	36575850	36575850	G	A	het	360.64	12
3	38889142	38889142	T	G	exonic	Fat4	.	nonsynonymous SNV	Fat4:NM_183221:exon1:c.T2183G:p.I728R	.	het	.	3	38889142	38889142	T	G	het	129.64	11
3	38942864	38942864	G	A	exonic	Fat4	.	nonsynonymous SNV	Fat4:NM_183221:exon2:c.C5231A:p.T1744N	.	het	.	3	38942864	38942864	G	A	het	175.64	19
3	51266766	51266766	G	T	exonic	Elf2	.	nonsynonymous SNV	Elf2:NM_001291062:exon2:c.T159A:p.D53E,Elf2:NM_001291063:exon2:c.T159A:p.D53E,Elf2:NM_001291059:exon5:c.T339A:p.D113E,Elf2:NM_023502:exon5:c.T339A:p.D113E,Elf2:NM_001356358:exon6:c.T102A:p.D34E	.	het	.	3	51266766	51266766	G	T	het	78.64	12
3	51689991	51689991	A	G	exonic	Maml3	.	nonsynonymous SNV	Maml3:NM_001004176:exon5:c.T3271C:p.Y1091H	.	het	.	3	51689991	51689991	A	G	het	165.64	24
3	52103984	52103984	A	G	exonic	Maml3	.	nonsynonymous SNV	Maml3:NM_001004176:exon1:c.G160C:p.G54R	.	het	.	3	52103984	52103984	A	G	het	80.64	13
3	52104076	52104076	C	A	exonic	Maml3	.	nonsynonymous SNV	Maml3:NM_001004176:exon1:c.G68T:p.S23I	.	het	.	3	52104076	52104076	C	A	het	108.64	13
3	58691427	58691427	G	A	exonic	Siah2	.	nonsynonymous SNV	Siah2:NM_009174:exon1:c.A389T:p.K130M	.	het	.	3	58691427	58691427	G	A	het	85.64	14
3	58691572	58691572	A	C	exonic	Siah2	.	nonsynonymous SNV	Siah2:NM_009174:exon1:c.C244G:p.P82A	.	het	.	3	58691572	58691572	A	C	het	121.64	25
3	64716107	64716107	A	C	exonic	Vmn2r7	.	nonsynonymous SNV	Vmn2r7:NM_175674:exon2:c.C791G:p.P264R	.	het	.	3	64716107	64716107	A	C	het	42.64	12
3	65531642	65531642	A	G	exonic	Tiparp	.	nonsynonymous SNV	Tiparp:NM_178892:exon2:c.T378G:p.H126Q	.	het	.	3	65531642	65531642	A	G	het	127.64	15
3	65532091	65532091	T	G	exonic	Tiparp	.	nonsynonymous SNV	Tiparp:NM_178892:exon2:c.C827G:p.T276S	.	het	.	3	65532091	65532091	T	G	het	25.64	16
3	69552830	69552830	C	T	exonic	Ppm1l	.	nonsynonymous SNV	Ppm1l:NM_178726:exon4:c.G739T:p.G247W	.	het	.	3	69552830	69552830	C	T	het	48.64	10
3	83285394	83285394	A	T	exonic	Dchs2	.	nonsynonymous SNV	Dchs2:NM_001357165:exon10:c.A5145T:p.Q1715H	.	het	.	3	83285394	83285394	A	T	het	37.64	12
3	84515784	84515784	T	C	exonic	Arfip1	.	nonsynonymous SNV	Arfip1:NM_001293801:exon6:c.T544G:p.F182V,Arfip1:NM_001081093:exon7:c.T640G:p.F214V	.	het	.	3	84515784	84515784	T	C	het	113.64	17
3	87097751	87097751	C	G	exonic	Kirrel	.	nonsynonymous SNV	Kirrel:NM_001377046:exon2:c.G208C:p.G70R,Kirrel:NM_001170985:exon3:c.G289C:p.G97R,Kirrel:NM_130867:exon3:c.G289C:p.G97R	.	het	.	3	87097751	87097751	C	G	het	39.64	10
3	87444236	87444236	T	C	exonic	Fcrl5	.	nonsynonymous SNV	Fcrl5:NM_001113238:exon4:c.A526C:p.I176L,Fcrl5:NM_183222:exon5:c.A790C:p.I264L	.	het	.	3	87444236	87444236	T	C	het	28.64	15
3	87457787	87457787	0	G	exonic	Fcrl5	.	nonsynonymous SNV	Fcrl5:NM_001113238:exon11:c.A1478G:p.Q493R,Fcrl5:NM_183222:exon12:c.A1742G:p.Q581R	.	het	.	3	87457787	87457787	-	G	het	166.60	17
3	87859313	87859313	0	C	exonic	Prcc	.	nonsynonymous SNV	Prcc:NM_033573:exon7:c.T1423G:p.W475G	.	het	.	3	87859313	87859313	-	C	het	73.60	18
3	87867335	87867335	A	T	exonic	Prcc	.	nonsynonymous SNV	Prcc:NM_033573:exon4:c.T1159A:p.S387T	.	het	.	3	87867335	87867335	A	T	het	136.64	20
3	87885318	87885318	G	A	exonic	Prcc	.	nonsynonymous SNV	Prcc:NM_033573:exon1:c.A25T:p.S9C	.	het	.	3	87885318	87885318	G	A	het	169.64	21
3	87913165	87913165	G	T	exonic	Hdgf	.	nonsynonymous SNV	Hdgf:NM_001331051:exon2:c.G5T:p.R2I,Hdgf:NM_001331052:exon2:c.G66T:p.E22D,Hdgf:NM_008231:exon2:c.G162T:p.E54D	.	het	.	3	87913165	87913165	G	T	het	84.64	10
3	87921890	87921890	G	A	exonic	Mrpl24	.	nonsynonymous SNV	Mrpl24:NM_026591:exon2:c.T25A:p.L9M	.	het	.	3	87921890	87921890	G	A	het	139.64	11
3	87921894	87921894	A	T	exonic	Mrpl24	.	nonsynonymous SNV	Mrpl24:NM_026591:exon2:c.C29T:p.A10V	.	het	.	3	87921894	87921894	A	T	het	139.64	11
3	87923246	87923246	T	C	exonic	Mrpl24	.	nonsynonymous SNV	Mrpl24:NM_026591:exon6:c.A551C:p.E184A	.	het	.	3	87923246	87923246	T	C	het	133.64	13
3	87923329	87923329	T	C	exonic	Mrpl24	.	nonsynonymous SNV	Mrpl24:NM_026591:exon6:c.A634C:p.K212Q	.	het	.	3	87923329	87923329	T	C	het	178.64	21
3	87938621	87938621	G	A	exonic	Isg20l2	.	nonsynonymous SNV	Isg20l2:NM_177663:exon3:c.C840A:p.H280Q	.	het	.	3	87938621	87938621	G	A	het	77.64	16
3	87938632	87938632	A	G	exonic	Isg20l2	.	nonsynonymous SNV	Isg20l2:NM_177663:exon3:c.A851G:p.K284R	.	het	.	3	87938632	87938632	A	G	het	110.64	15
3	87976132	87976132	G	A	exonic	Nes	.	nonsynonymous SNV	Nes:NM_016701:exon4:c.T1697A:p.I566K	.	het	.	3	87976132	87976132	G	A	het	43.64	10
3	87978033	87978033	T	C	exonic	Nes	.	nonsynonymous SNV	Nes:NM_016701:exon4:c.G3598C:p.E1200Q	.	het	.	3	87978033	87978033	T	C	het	259.64	18
3	87978704	87978704	A	T	exonic	Nes	.	nonsynonymous SNV	Nes:NM_016701:exon4:c.A4269T:p.E1423D	.	het	.	3	87978704	87978704	A	T	het	65.64	15
3	87979491	87979491	C	A	exonic	Nes	.	nonsynonymous SNV	Nes:NM_016701:exon4:c.T5056A:p.W1686R	.	het	.	3	87979491	87979491	C	A	het	51.64	21
3	87979555	87979555	G	C	exonic	Nes	.	nonsynonymous SNV	Nes:NM_016701:exon4:c.T5120C:p.L1707P	.	het	.	3	87979555	87979555	G	C	het	39.64	22
3	87979603	87979603	T	C	exonic	Nes	.	nonsynonymous SNV	Nes:NM_016701:exon4:c.G5168C:p.S1723T	.	het	.	3	87979603	87979603	T	C	het	46.64	23
3	87979793	87979793	A	G	exonic	Nes	.	nonsynonymous SNV	Nes:NM_016701:exon4:c.T5358G:p.S1786R	.	het	.	3	87979793	87979793	A	G	het	51.64	24
3	87979970	87979970	A	C	exonic	Nes	.	nonsynonymous SNV	Nes:NM_016701:exon4:c.G5535C:p.Q1845H	.	het	.	3	87979970	87979970	A	C	het	212.64	25
3	87997329	87997329	A	T	exonic	Bcan	.	nonsynonymous SNV	Bcan:NM_001109758:exon3:c.G119A:p.G40D,Bcan:NM_007529:exon3:c.G119A:p.G40D	.	het	.	3	87997329	87997329	A	T	het	67.64	25
3	88022687	88022687	A	G	exonic	Hapln2	.	nonsynonymous SNV	Hapln2:NM_022031:exon7:c.G881C:p.G294A	.	het	.	3	88022687	88022687	A	G	het	255.64	24
3	88022711	88022711	G	A	exonic	Hapln2	.	nonsynonymous SNV	Hapln2:NM_022031:exon7:c.C857T:p.S286F	.	het	.	3	88022711	88022711	G	A	het	214.64	24
3	88023625	88023625	A	G	exonic	Hapln2	.	nonsynonymous SNV	Hapln2:NM_022031:exon5:c.A458C:p.Y153S	.	het	.	3	88023625	88023625	A	G	het	66.64	14
3	88328289	88328289	C	T	exonic	Glmp	.	nonsynonymous SNV	Glmp:NM_020003:exon6:c.C1136T:p.P379L	.	het	.	3	88328289	88328289	C	T	het	318.64	15
3	89148842	89148842	A	G	exonic	Hcn3	.	nonsynonymous SNV	Hcn3:NM_008227:exon7:c.T1514C:p.V505A	.	het	.	3	89148842	89148842	A	G	het	125.64	10
3	89183770	89183770	G	A	exonic	Fam189b	.	nonsynonymous SNV	Fam189b:NM_001014995:exon1:c.C47A:p.P16H	.	het	.	3	89183770	89183770	G	A	het	135.64	19
3	89187106	89187106	G	T	exonic	Fam189b	.	nonsynonymous SNV	Fam189b:NM_001355765:exon8:c.C43T:p.P15S,Fam189b:NM_001014995:exon9:c.C1015T:p.P339S,Fam189b:NM_001355760:exon9:c.C697T:p.P233S	.	het	.	3	89187106	89187106	G	T	het	218.64	19
3	89187408	89187408	T	C	exonic	Fam189b	.	nonsynonymous SNV	Fam189b:NM_001355765:exon8:c.G345C:p.E115D,Fam189b:NM_001014995:exon9:c.G1317C:p.E439D,Fam189b:NM_001355760:exon9:c.G999C:p.E333D	.	het	.	3	89187408	89187408	T	C	het	56.64	12
3	89230144	89230144	C	G	exonic	Muc1	.	nonsynonymous SNV	Muc1:NM_013605:exon2:c.A292G:p.T98A	.	het	.	3	89230144	89230144	C	G	het	94.64	18
3	89652117	89652117	0	A	exonic	Kcnn3	.	nonsynonymous SNV	Kcnn3:NM_080466:exon5:c.C1693A:p.L565I	.	het	.	3	89652117	89652117	-	A	het	43.60	10
3	92850245	92850245	A	G	exonic	Lce1l	.	nonsynonymous SNV	Lce1l:NM_028628:exon2:c.G305C:p.G102A	.	het	.	3	92850245	92850245	A	G	het	45.64	11
3	92850254	92850254	T	C	exonic	Lce1l	.	nonsynonymous SNV	Lce1l:NM_028628:exon2:c.A296G:p.H99R	.	het	.	3	92850254	92850254	T	C	het	33.64	12
3	93200310	93200310	G	C	exonic	Flg2	.	nonsynonymous SNV	Flg2:NM_001013804:exon2:c.A101C:p.K34T	.	het	.	3	93200310	93200310	G	C	het	115.64	27
3	94387156	94387156	C	T	exonic	Rorc	.	nonsynonymous SNV	Rorc:NM_001293734:exon2:c.G43T:p.D15Y,Rorc:NM_011281:exon3:c.G106T:p.D36Y	.	het	.	3	94387156	94387156	C	T	het	74.64	27
3	95036735	95036735	C	G	exonic	Psmd4	.	nonsynonymous SNV	Psmd4:NM_001282017:exon2:c.A37C:p.S13R,Psmd4:NM_008951:exon2:c.A37C:p.S13R	.	het	.	3	95036735	95036735	C	G	het	84.64	10
3	95170846	95170846	T	C	exonic	Sema6c	.	nonsynonymous SNV	Sema6c:NM_011351:exon13:c.G1532C:p.C511S,Sema6c:NM_001272024:exon16:c.G1532C:p.C511S	.	het	.	3	95170846	95170846	T	C	het	109.64	21
3	95189182	95189182	A	G	exonic	Gabpb2	.	nonsynonymous SNV	Gabpb2:NM_172512:exon8:c.A911C:p.E304A,Gabpb2:NM_029885:exon9:c.A911C:p.E304A	.	het	.	3	95189182	95189182	A	G	het	151.64	15
3	95263617	95263617	C	T	exonic	Prune1	.	nonsynonymous SNV	Prune1:NM_173347:exon4:c.C495A:p.D165E	.	het	.	3	95263617	95263617	C	T	het	115.64	34
3	95263619	95263619	C	T	exonic	Prune1	.	nonsynonymous SNV	Prune1:NM_173347:exon4:c.G493A:p.D165N	.	het	.	3	95263619	95263619	C	T	het	115.64	34
3	95324107	95324107	A	G	exonic	Setdb1	.	nonsynonymous SNV	Setdb1:NM_001163641:exon22:c.G3893C:p.C1298S,Setdb1:NM_001163642:exon22:c.G3890C:p.C1297S,Setdb1:NM_018877:exon22:c.G3893C:p.C1298S	.	het	.	3	95324107	95324107	A	G	het	54.64	15
3	95448426	95448426	G	T	exonic	Arnt	.	nonsynonymous SNV	Arnt:NM_001037737:exon2:c.G80T:p.G27V,Arnt:NM_009709:exon2:c.G80T:p.G27V	.	het	.	3	95448426	95448426	G	T	het	34.64	13
3	95452620	95452620	C	T	exonic	Arnt	.	nonsynonymous SNV	Arnt:NM_001037737:exon3:c.A173T:p.K58I,Arnt:NM_009709:exon3:c.A173T:p.K58I	.	het	.	3	95452620	95452620	C	T	het	99.64	10
3	95580017	95580017	A	G	exonic	Hormad1	.	nonsynonymous SNV	Hormad1:NM_001289532:exon11:c.A811G:p.I271V,Hormad1:NM_001289534:exon11:c.A811G:p.I271V,Hormad1:NM_001289537:exon11:c.A811G:p.I271V,Hormad1:NM_001373886:exon11:c.A811G:p.I271V,Hormad1:NM_026489:exon11:c.A811G:p.I271V	.	het	.	3	95580017	95580017	A	G	het	71.64	15
3	95880700	95880700	0	T	exonic	Ciart	.	nonsynonymous SNV	Ciart:NM_001033302:exon4:c.C435A:p.F145L	.	het	.	3	95880700	95880700	-	T	het	20.60	13
3	95889770	95889770	T	C	exonic	BC028528	.	nonsynonymous SNV	BC028528:NM_001346514:exon2:c.A86G:p.D29G,BC028528:NM_153513:exon2:c.A86G:p.D29G	.	het	.	3	95889770	95889770	T	C	het	91.64	11
3	95894244	95894244	A	G	exonic	Aph1a	.	nonsynonymous SNV	Aph1a:NM_146104:exon1:c.T74G:p.V25G,Aph1a:NM_146134:exon1:c.T74G:p.V25G	.	het	.	3	95894244	95894244	A	G	het	166.64	17
3	95894825	95894825	0	C	exonic	Aph1a	.	nonsynonymous SNV	Aph1a:NM_146104:exon2:c.T118C:p.F40L,Aph1a:NM_146134:exon2:c.T118C:p.F40L	.	het	.	3	95894825	95894825	-	C	het	74.60	15
3	95894949	95894949	G	C	exonic	Aph1a	.	nonsynonymous SNV	Aph1a:NM_146104:exon2:c.T242C:p.L81P,Aph1a:NM_146134:exon2:c.T242C:p.L81P	.	het	.	3	95894949	95894949	G	C	het	80.64	22
3	96152570	96152570	T	G	exonic	Otud7b	.	nonsynonymous SNV	Otud7b:NM_001025614:exon10:c.A1181G:p.D394G,Otud7b:NM_001025613:exon11:c.A1181G:p.D394G	.	het	.	3	96152570	96152570	T	G	het	106.64	15
3	96177038	96177038	C	T	exonic	Sf3b4	.	nonsynonymous SNV	Sf3b4:NM_153053:exon6:c.C1147T:p.H383Y	.	het	.	3	96177038	96177038	C	T	het	47.64	12
3	96185253	96185253	A	T	exonic	Sv2a	.	nonsynonymous SNV	Sv2a:NM_022030:exon2:c.G268T:p.D90Y	.	het	.	3	96185253	96185253	A	T	het	124.64	16
3	96185329	96185329	A	C	exonic	Sv2a	.	nonsynonymous SNV	Sv2a:NM_022030:exon2:c.A344C:p.D115A	.	het	.	3	96185329	96185329	A	C	het	68.64	14
3	96190715	96190715	G	A	exonic	Sv2a	.	nonsynonymous SNV	Sv2a:NM_022030:exon10:c.T1633A:p.F545I	.	het	.	3	96190715	96190715	G	A	het	46.64	12
3	96190741	96190741	C	A	exonic	Sv2a	.	nonsynonymous SNV	Sv2a:NM_022030:exon10:c.C1659A:p.N553K	.	het	.	3	96190741	96190741	C	A	het	104.64	13
3	96268823	96268823	A	T	exonic	H3c13	.	nonsynonymous SNV	H3c13:NM_178215:exon1:c.C130T:p.P44S	.	het	.	3	96268823	96268823	A	T	het	52.64	10
3	98231191	98231191	A	C	exonic	Reg4	.	nonsynonymous SNV	Reg4:NM_026328:exon4:c.T206C:p.V69A	.	het	.	3	98231191	98231191	A	C	het	52.64	10
3	102142252	102142252	A	G	exonic	Casq2	.	nonsynonymous SNV	Casq2:NM_009814:exon9:c.T911G:p.L304W,Casq2:NM_001355663:exon10:c.T920G:p.L307W	.	het	.	3	102142252	102142252	A	G	het	45.64	23
3	102142278	102142278	A	G	exonic	Casq2	.	nonsynonymous SNV	Casq2:NM_009814:exon9:c.C937G:p.L313V,Casq2:NM_001355663:exon10:c.C946G:p.L316V	.	het	.	3	102142278	102142278	A	G	het	57.64	22
3	102520679	102520679	C	G	exonic	Ngf	.	nonsynonymous SNV	Ngf:NM_001112698:exon3:c.A557G:p.E186G,Ngf:NM_013609:exon4:c.A755G:p.E252G	.	het	.	3	102520679	102520679	C	G	het	120.64	10
3	103810029	103810029	T	G	exonic	Ap4b1	.	nonsynonymous SNV	Ap4b1:NM_001163553:exon1:c.T85G:p.Y29D,Ap4b1:NM_026193:exon1:c.T85G:p.Y29D,Ap4b1:NM_001163552:exon2:c.T85G:p.Y29D	.	het	.	3	103810029	103810029	T	G	het	367.64	25
3	103914527	103914527	A	G	exonic	Rsbn1	.	nonsynonymous SNV	Rsbn1:NM_001356556:exon1:c.C77G:p.A26G,Rsbn1:NM_001356557:exon1:c.C77G:p.A26G,Rsbn1:NM_001356558:exon1:c.C77G:p.A26G,Rsbn1:NM_172684:exon1:c.C77G:p.A26G	.	het	.	3	103914527	103914527	A	G	het	177.64	20
3	106211285	106211285	A	C	exonic	Chil4	.	nonsynonymous SNV	Chil4:NM_145126:exon4:c.C314G:p.P105R	.	het	.	3	106211285	106211285	A	C	het	104.64	13
3	108856387	108856387	T	A	exonic	Fndc7	.	nonsynonymous SNV	Fndc7:NM_001165965:exon11:c.G1936T:p.D646Y,Fndc7:NM_177091:exon12:c.G2194T:p.D732Y	.	het	.	3	108856387	108856387	T	A	het	33.64	10
3	108953834	108953834	A	C	exonic	Henmt1	.	nonsynonymous SNV	Henmt1:NM_001078646:exon5:c.A301C:p.K101Q,Henmt1:NM_025723:exon5:c.A301C:p.K101Q	.	het	.	3	108953834	108953834	A	C	het	74.64	15
3	108978867	108978867	G	A	exonic	Fam102b	.	nonsynonymous SNV	Fam102b:NM_001163567:exon10:c.G1048T:p.G350C	.	het	.	3	108978867	108978867	G	A	het	46.64	12
3	108978882	108978882	G	T	exonic	Fam102b	.	nonsynonymous SNV	Fam102b:NM_001163567:exon10:c.G1033A:p.G345R	.	het	.	3	108978882	108978882	G	T	het	33.64	11
3	108978896	108978896	T	C	exonic	Fam102b	.	nonsynonymous SNV	Fam102b:NM_001163567:exon10:c.T1019G:p.F340C	.	het	.	3	108978896	108978896	T	C	het	46.64	12
3	116782562	116782562	A	C	exonic	Agl	.	nonsynonymous SNV	Agl:NM_001081326:exon13:c.A1693G:p.N565D,Agl:NM_001362367:exon13:c.A1693G:p.N565D	.	het	.	3	116782562	116782562	A	C	het	81.64	14
3	122110520	122110520	T	C	exonic	Abca4	.	nonsynonymous SNV	Abca4:NM_007378:exon15:c.T2219C:p.F740S	.	het	.	3	122110520	122110520	T	C	het	98.64	19
3	136325906	136325906	C	A	exonic	Bank1	.	nonsynonymous SNV	Bank1:NM_001033350:exon1:c.A34T:p.T12S,Bank1:NM_001310749:exon1:c.A34T:p.T12S	.	het	.	3	136325906	136325906	C	A	het	87.64	11
3	137927393	137927393	G	C	exonic	Lamtor3	.	nonsynonymous SNV	Lamtor3:NM_019920:exon6:c.G284C:p.S95T	.	het	.	3	137927393	137927393	G	C	het	90.64	11
3	138279827	138279827	G	T	exonic	Adh1	.	nonsynonymous SNV	Adh1:NM_007409:exon2:c.A115T:p.I39F	.	het	.	3	138279827	138279827	G	T	het	44.64	10
3	138282715	138282715	T	C	exonic	Adh1	.	nonsynonymous SNV	Adh1:NM_007409:exon5:c.T448C:p.Y150H	.	het	.	3	138282715	138282715	T	C	het	146.64	14
3	138282808	138282808	G	A	exonic	Adh1	.	nonsynonymous SNV	Adh1:NM_007409:exon5:c.T541A:p.Y181N	.	het	.	3	138282808	138282808	G	A	het	57.64	12
3	138349639	138349639	C	T	exonic	Adh6b	.	nonsynonymous SNV	Adh6b:NM_001370857:exon5:c.C149T:p.A50V	.	het	.	3	138349639	138349639	C	T	het	122.64	14
3	138447110	138447110	C	T	exonic	Adh5	.	nonsynonymous SNV	Adh5:NM_007410:exon3:c.G142T:p.D48Y	.	het	.	3	138447110	138447110	C	T	het	80.64	10
3	142633382	142633382	A	T	exonic	Gbp2	.	nonsynonymous SNV	Gbp2:NM_010260:exon8:c.G1194T:p.M398I	.	het	.	3	142633382	142633382	A	T	het	127.64	15
3	142633387	142633387	G	A	exonic	Gbp2	.	nonsynonymous SNV	Gbp2:NM_010260:exon8:c.T1199A:p.V400D	.	het	.	3	142633387	142633387	G	A	het	130.64	14
3	142633476	142633476	G	A	exonic	Gbp2	.	nonsynonymous SNV	Gbp2:NM_010260:exon8:c.G1288A:p.G430S	.	het	.	3	142633476	142633476	G	A	het	180.64	11
3	142723240	142723240	C	T	exonic	Kyat3	.	nonsynonymous SNV	Kyat3:NM_001293560:exon5:c.A432T:p.Q144H,Kyat3:NM_173763:exon5:c.A327T:p.Q109H	.	het	.	3	142723240	142723240	C	T	het	128.64	15
3	145939012	145939012	C	T	exonic	2410004B18Rik	.	nonsynonymous SNV	2410004B18Rik:NM_001356284:exon2:c.A385T:p.I129F,2410004B18Rik:NM_025555:exon2:c.A385T:p.I129F	.	het	.	3	145939012	145939012	C	T	het	130.64	14
3	146129111	146129111	G	T	exonic	Mcoln3	.	nonsynonymous SNV	Mcoln3:NM_134160:exon5:c.G651T:p.E217D	.	het	.	3	146129111	146129111	G	T	het	67.64	18
3	146133683	146133683	T	C	exonic	Mcoln3	.	nonsynonymous SNV	Mcoln3:NM_134160:exon7:c.A866C:p.D289A	.	het	.	3	146133683	146133683	T	C	het	79.64	16
3	146133700	146133700	A	G	exonic	Mcoln3	.	nonsynonymous SNV	Mcoln3:NM_134160:exon7:c.A883G:p.T295A	.	het	.	3	146133700	146133700	A	G	het	79.64	16
3	146139413	146139413	T	G	exonic	Mcoln3	.	nonsynonymous SNV	Mcoln3:NM_134160:exon11:c.A1363G:p.I455V	.	het	.	3	146139413	146139413	T	G	het	118.64	14
3	146139497	146139497	G	A	exonic	Mcoln3	.	nonsynonymous SNV	Mcoln3:NM_134160:exon11:c.T1447A:p.Y483N	.	het	.	3	146139497	146139497	G	A	het	225.64	19
3	146487552	146487552	G	A	exonic	Spata1	.	nonsynonymous SNV	Spata1:NM_001316756:exon5:c.A275T:p.Q92L,Spata1:NM_001370604:exon5:c.A275T:p.Q92L,Spata1:NM_027617:exon5:c.A275T:p.Q92L	.	het	.	3	146487552	146487552	G	A	het	95.64	11
4	6741559	6741559	C	A	exonic	Tox	.	nonsynonymous SNV	Tox:NM_145711:exon4:c.G420T:p.E140D,Tox:NM_001377078:exon5:c.G420T:p.E140D,Tox:NM_001377079:exon5:c.G420T:p.E140D	.	het	.	4	6741559	6741559	C	A	het	64.64	21
4	21873684	21873684	C	G	exonic	Pnisr	.	nonsynonymous SNV	Pnisr:NM_001369189:exon11:c.C1426G:p.R476G,Pnisr:NM_001369190:exon11:c.C700G:p.R234G,Pnisr:NM_001369191:exon11:c.C700G:p.R234G,Pnisr:NM_025669:exon11:c.C1426G:p.R476G	.	het	.	4	21873684	21873684	C	G	het	90.64	11
4	24649666	24649666	A	G	exonic	Klhl32	.	nonsynonymous SNV	Klhl32:NM_001033531:exon6:c.T1129C:p.C377R,Klhl32:NM_001355618:exon6:c.T523C:p.C175R,Klhl32:NM_001163020:exon7:c.T1228C:p.C410R	.	het	.	4	24649666	24649666	A	G	het	121.64	17
4	34675065	34675065	C	T	exonic	Slc35a1	.	nonsynonymous SNV	Slc35a1:NM_011895:exon4:c.G472A:p.V158I	.	het	.	4	34675065	34675065	C	T	het	49.64	11
4	40473973	40473973	G	C	exonic	Tmem215	.	nonsynonymous SNV	Tmem215:NM_001166009:exon2:c.G49C:p.V17L,Tmem215:NM_177175:exon2:c.G49C:p.V17L	.	het	.	4	40473973	40473973	G	C	het	37.64	15
4	41136077	41136077	A	C	exonic	Ube2r2	.	nonsynonymous SNV	Ube2r2:NM_026275:exon1:c.A8C:p.Q3P	.	het	.	4	41136077	41136077	A	C	het	20.64	15
4	41195171	41195171	C	A	exonic	Ubap2	.	nonsynonymous SNV	Ubap2:NM_026872:exon29:c.G3379T:p.A1127S	.	het	.	4	41195171	41195171	C	A	het	95.64	35
4	41199763	41199763	A	G	exonic	Ubap2	.	nonsynonymous SNV	Ubap2:NM_026872:exon20:c.T2366C:p.V789A	.	het	.	4	41199763	41199763	A	G	het	91.64	20
4	41395431	41395431	T	C	exonic	Kif24	.	nonsynonymous SNV	Kif24:NM_024241:exon11:c.A1843G:p.T615A	.	het	.	4	41395431	41395431	T	C	het	101.64	18
4	41499625	41499625	A	G	exonic	Myorg	.	nonsynonymous SNV	Myorg:NM_001085515:exon2:c.T4C:p.S2P	.	het	.	4	41499625	41499625	A	G	het	226.64	17
4	41658786	41658786	G	A	exonic	Cntfr	.	nonsynonymous SNV	Cntfr:NM_001136056:exon8:c.C944T:p.A315V,Cntfr:NM_001379211:exon8:c.C944T:p.A315V,Cntfr:NM_001379212:exon8:c.C944T:p.A315V,Cntfr:NM_001379213:exon8:c.C944T:p.A315V,Cntfr:NM_001379214:exon8:c.C944T:p.A315V,Cntfr:NM_001379215:exon8:c.C944T:p.A315V,Cntfr:NM_001379216:exon8:c.C944T:p.A315V,Cntfr:NM_016673:exon8:c.C944T:p.A315V	.	het	.	4	41658786	41658786	G	A	het	40.64	14
4	41756515	41756515	C	A	exonic	Galt	.	nonsynonymous SNV	Galt:NM_001369135:exon4:c.C304A:p.P102T,Galt:NM_016658:exon4:c.C274A:p.P92T	.	het	.	4	41756515	41756515	C	A	het	61.64	24
4	41767987	41767987	G	A	exonic	Il11ra1	.	nonsynonymous SNV	Il11ra1:NM_001163401:exon10:c.G994A:p.G332R,Il11ra1:NM_010549:exon10:c.G994A:p.G332R,Il11ra1:NM_001172054:exon11:c.G994A:p.G332R	.	het	.	4	41767987	41767987	G	A	het	167.64	23
4	41768192	41768192	G	A	exonic	Il11ra1	.	nonsynonymous SNV	Il11ra1:NM_001163401:exon11:c.G1102A:p.V368I,Il11ra1:NM_010549:exon11:c.G1102A:p.V368I,Il11ra1:NM_001172054:exon12:c.G1102A:p.V368I	.	het	.	4	41768192	41768192	G	A	het	101.64	19
4	42850156	42850156	A	C	exonic	Fam205a1	.	nonsynonymous SNV	Fam205a1:NM_001277167:exon4:c.T1999G:p.F667V	.	het	.	4	42850156	42850156	A	C	het	59.64	17
4	42972916	42972916	T	C	exonic	1700022I11Rik	.	nonsynonymous SNV	1700022I11Rik:NM_026088:exon2:c.T2248C:p.S750P	.	het	.	4	42972916	42972916	T	C	het	169.64	20
4	42973058	42973058	C	T	exonic	1700022I11Rik	.	nonsynonymous SNV	1700022I11Rik:NM_026088:exon2:c.C2390T:p.T797M	.	het	.	4	42973058	42973058	C	T	het	175.64	19
4	42973108	42973108	C	G	exonic	1700022I11Rik	.	nonsynonymous SNV	1700022I11Rik:NM_026088:exon2:c.C2440G:p.L814V	.	het	.	4	42973108	42973108	C	G	het	292.64	21
4	42973653	42973653	T	A	exonic	1700022I11Rik	.	nonsynonymous SNV	1700022I11Rik:NM_026088:exon2:c.T2985A:p.S995R	.	het	.	4	42973653	42973653	T	A	het	97.64	10
4	42973660	42973660	C	A	exonic	1700022I11Rik	.	nonsynonymous SNV	1700022I11Rik:NM_026088:exon2:c.C2992A:p.L998M	.	het	.	4	42973660	42973660	C	A	het	97.64	10
4	42973753	42973753	A	G	exonic	1700022I11Rik	.	nonsynonymous SNV	1700022I11Rik:NM_026088:exon2:c.A3085G:p.T1029A	.	het	.	4	42973753	42973753	A	G	het	153.64	13
4	42973817	42973817	G	A	exonic	1700022I11Rik	.	nonsynonymous SNV	1700022I11Rik:NM_026088:exon2:c.G3149A:p.R1050K	.	het	.	4	42973817	42973817	G	A	het	160.64	12
4	42973949	42973949	G	A	exonic	1700022I11Rik	.	nonsynonymous SNV	1700022I11Rik:NM_026088:exon2:c.G3281A:p.R1094K	.	het	.	4	42973949	42973949	G	A	het	200.64	15
4	43002991	43002991	A	T	exonic	Fancg	.	nonsynonymous SNV	Fancg:NM_001163233:exon14:c.T1844A:p.V615D,Fancg:NM_053081:exon14:c.T1865A:p.V622D	.	het	.	4	43002991	43002991	A	T	het	84.64	18
4	43004853	43004853	C	T	exonic	Fancg	.	nonsynonymous SNV	Fancg:NM_001163233:exon10:c.G1318A:p.A440T,Fancg:NM_053081:exon10:c.G1339A:p.A447T	.	het	.	4	43004853	43004853	C	T	het	338.64	24
4	43004915	43004915	A	C	exonic	Fancg	.	nonsynonymous SNV	Fancg:NM_001163233:exon10:c.T1256G:p.L419R,Fancg:NM_053081:exon10:c.T1277G:p.L426R	.	het	.	4	43004915	43004915	A	C	het	263.64	23
4	43004997	43004997	G	C	exonic	Fancg	.	nonsynonymous SNV	Fancg:NM_001163233:exon10:c.C1174G:p.P392A,Fancg:NM_053081:exon10:c.C1195G:p.P399A	.	het	.	4	43004997	43004997	G	C	het	173.64	12
4	43007069	43007069	T	C	exonic	Fancg	.	nonsynonymous SNV	Fancg:NM_001163233:exon6:c.A707G:p.N236S,Fancg:NM_053081:exon6:c.A707G:p.N236S	.	het	.	4	43007069	43007069	T	C	het	66.64	15
4	43010025	43010025	C	T	exonic	Fancg	.	nonsynonymous SNV	Fancg:NM_001163233:exon1:c.G73A:p.D25N,Fancg:NM_053081:exon1:c.G73A:p.D25N	.	het	.	4	43010025	43010025	C	T	het	66.64	14
4	43019315	43019315	A	T	exonic	Pigo	.	nonsynonymous SNV	Pigo:NM_020035:exon8:c.T3002A:p.L1001Q,Pigo:NM_001305386:exon9:c.T2978A:p.L993Q,Pigo:NM_001305387:exon9:c.T2906A:p.L969Q	.	het	.	4	43019315	43019315	A	T	het	191.64	24
4	43020372	43020372	T	G	exonic	Pigo	.	nonsynonymous SNV	Pigo:NM_020035:exon6:c.A2569C:p.M857L,Pigo:NM_001305386:exon7:c.A2545C:p.M849L,Pigo:NM_001305387:exon7:c.A2545C:p.M849L	.	het	.	4	43020372	43020372	T	G	het	327.64	34
4	43021451	43021451	G	C	exonic	Pigo	.	nonsynonymous SNV	Pigo:NM_020035:exon6:c.C1490G:p.A497G,Pigo:NM_001305386:exon7:c.C1466G:p.A489G,Pigo:NM_001305387:exon7:c.C1466G:p.A489G	.	het	.	4	43021451	43021451	G	C	het	218.64	20
4	43036567	43036567	G	A	exonic	Fam214b	.	nonsynonymous SNV	Fam214b:NM_001253353:exon3:c.C163T:p.P55S,Fam214b:NM_172691:exon3:c.C163T:p.P55S,Fam214b:NM_001253354:exon4:c.C163T:p.P55S	.	het	.	4	43036567	43036567	G	A	het	213.64	20
4	43415204	43415204	A	G	exonic	Rusc2	.	nonsynonymous SNV	Rusc2:NM_001037709:exon2:c.A509G:p.H170R,Rusc2:NM_001369198:exon2:c.A509G:p.H170R,Rusc2:NM_199057:exon2:c.A509G:p.H170R	.	het	.	4	43415204	43415204	A	G	het	307.64	30
4	43415282	43415282	G	A	exonic	Rusc2	.	nonsynonymous SNV	Rusc2:NM_001037709:exon2:c.G587A:p.C196Y,Rusc2:NM_001369198:exon2:c.G587A:p.C196Y,Rusc2:NM_199057:exon2:c.G587A:p.C196Y	.	het	.	4	43415282	43415282	G	A	het	173.64	21
4	43415362	43415362	A	G	exonic	Rusc2	.	nonsynonymous SNV	Rusc2:NM_001037709:exon2:c.A667G:p.T223A,Rusc2:NM_001369198:exon2:c.A667G:p.T223A,Rusc2:NM_199057:exon2:c.A667G:p.T223A	.	het	.	4	43415362	43415362	A	G	het	55.64	13
4	43415590	43415590	A	G	exonic	Rusc2	.	nonsynonymous SNV	Rusc2:NM_001037709:exon2:c.A895G:p.S299G,Rusc2:NM_001369198:exon2:c.A895G:p.S299G,Rusc2:NM_199057:exon2:c.A895G:p.S299G	.	het	.	4	43415590	43415590	A	G	het	96.64	17
4	43415813	43415813	A	G	exonic	Rusc2	.	nonsynonymous SNV	Rusc2:NM_001037709:exon2:c.A1118G:p.H373R,Rusc2:NM_001369198:exon2:c.A1118G:p.H373R,Rusc2:NM_199057:exon2:c.A1118G:p.H373R	.	het	.	4	43415813	43415813	A	G	het	139.64	19
4	43416016	43416016	C	T	exonic	Rusc2	.	nonsynonymous SNV	Rusc2:NM_001037709:exon2:c.C1321T:p.P441S,Rusc2:NM_001369198:exon2:c.C1321T:p.P441S,Rusc2:NM_199057:exon2:c.C1321T:p.P441S	.	het	.	4	43416016	43416016	C	T	het	163.64	23
4	43416680	43416680	C	A	exonic	Rusc2	.	nonsynonymous SNV	Rusc2:NM_001037709:exon2:c.C1985A:p.T662N,Rusc2:NM_001369198:exon2:c.C1985A:p.T662N,Rusc2:NM_199057:exon2:c.C1985A:p.T662N	.	het	.	4	43416680	43416680	C	A	het	121.64	25
4	43416700	43416700	T	G	exonic	Rusc2	.	nonsynonymous SNV	Rusc2:NM_001037709:exon2:c.T2005G:p.S669A,Rusc2:NM_001369198:exon2:c.T2005G:p.S669A,Rusc2:NM_199057:exon2:c.T2005G:p.S669A	.	het	.	4	43416700	43416700	T	G	het	245.64	23
4	43421763	43421763	C	G	exonic	Rusc2	.	nonsynonymous SNV	Rusc2:NM_001369199:exon2:c.C4G:p.P2A,Rusc2:NM_001037709:exon3:c.C2182G:p.P728A,Rusc2:NM_001369198:exon3:c.C2182G:p.P728A,Rusc2:NM_199057:exon3:c.C2182G:p.P728A	.	het	.	4	43421763	43421763	C	G	het	334.64	21
4	43421764	43421764	C	G	exonic	Rusc2	.	nonsynonymous SNV	Rusc2:NM_001369199:exon2:c.C5G:p.P2R,Rusc2:NM_001037709:exon3:c.C2183G:p.P728R,Rusc2:NM_001369198:exon3:c.C2183G:p.P728R,Rusc2:NM_199057:exon3:c.C2183G:p.P728R	.	het	.	4	43421764	43421764	C	G	het	334.64	21
4	43422018	43422018	A	G	exonic	Rusc2	.	nonsynonymous SNV	Rusc2:NM_001369199:exon2:c.A259G:p.T87A,Rusc2:NM_001037709:exon3:c.A2437G:p.T813A,Rusc2:NM_001369198:exon3:c.A2437G:p.T813A,Rusc2:NM_199057:exon3:c.A2437G:p.T813A	.	het	.	4	43422018	43422018	A	G	het	358.64	30
4	43426515	43426515	A	G	exonic	Rusc2	.	nonsynonymous SNV	Rusc2:NM_001369199:exon11:c.A2260G:p.I754V,Rusc2:NM_001037709:exon12:c.A4438G:p.I1480V,Rusc2:NM_199057:exon12:c.A4438G:p.I1480V	.	het	.	4	43426515	43426515	A	G	het	386.64	28
4	43426539	43426539	A	G	exonic	Rusc2	.	nonsynonymous SNV	Rusc2:NM_001369199:exon11:c.A2284G:p.R762G,Rusc2:NM_001037709:exon12:c.A4462G:p.R1488G,Rusc2:NM_199057:exon12:c.A4462G:p.R1488G	.	het	.	4	43426539	43426539	A	G	het	353.64	27
4	43427445	43427445	C	A	exonic	Fam166b	.	nonsynonymous SNV	Fam166b:NM_177377:exon4:c.G878T:p.R293L	.	het	.	4	43427445	43427445	C	A	het	229.64	26
4	43427455	43427455	G	T	exonic	Fam166b	.	nonsynonymous SNV	Fam166b:NM_177377:exon4:c.C868A:p.L290I	.	het	.	4	43427455	43427455	G	T	het	229.64	26
4	43427467	43427467	C	T	exonic	Fam166b	.	nonsynonymous SNV	Fam166b:NM_177377:exon4:c.G856A:p.G286R	.	het	.	4	43427467	43427467	C	T	het	219.64	29
4	43427722	43427722	G	A	exonic	Fam166b	.	nonsynonymous SNV	Fam166b:NM_177377:exon4:c.C601T:p.P201S	.	het	.	4	43427722	43427722	G	A	het	253.64	20
4	43446006	43446006	A	T	exonic	Tesk1	.	nonsynonymous SNV	Tesk1:NM_011571:exon9:c.A938T:p.Q313L	.	het	.	4	43446006	43446006	A	T	het	103.64	15
4	43447061	43447061	T	C	exonic	Tesk1	.	nonsynonymous SNV	Tesk1:NM_011571:exon10:c.T1448C:p.L483P	.	het	.	4	43447061	43447061	T	C	het	115.64	19
4	43452378	43452378	C	T	exonic	Cd72	.	nonsynonymous SNV	Cd72:NM_001110322:exon3:c.G452A:p.R151Q,Cd72:NM_001110321:exon4:c.G542A:p.R181Q,Cd72:NM_001110320:exon5:c.G614A:p.R205Q,Cd72:NM_007654:exon5:c.G614A:p.R205Q	.	het	.	4	43452378	43452378	C	T	het	58.64	22
4	43453669	43453669	G	C	exonic	Cd72	.	nonsynonymous SNV	Cd72:NM_001110320:exon3:c.C234G:p.N78K,Cd72:NM_007654:exon3:c.C234G:p.N78K	.	het	.	4	43453669	43453669	G	C	het	44.64	22
4	43563117	43563117	T	C	exonic	Creb3	.	nonsynonymous SNV	Creb3:NM_013497:exon2:c.T215C:p.V72A	.	het	.	4	43563117	43563117	T	C	het	153.64	17
4	43566507	43566507	G	C	exonic	Creb3	.	nonsynonymous SNV	Creb3:NM_013497:exon9:c.G850C:p.D284H	.	het	.	4	43566507	43566507	G	C	het	89.64	20
4	43569226	43569226	C	T	exonic	Gba2	.	nonsynonymous SNV	Gba2:NM_172692:exon10:c.G1615A:p.V539I	.	het	.	4	43569226	43569226	C	T	het	105.64	14
4	43651763	43651763	C	T	exonic	Spag8	.	nonsynonymous SNV	Spag8:NM_001007463:exon6:c.G1202A:p.R401Q,Spag8:NM_001290462:exon6:c.G1202A:p.R401Q	.	het	.	4	43651763	43651763	C	T	het	287.64	42
4	43656402	43656402	G	A	exonic	Hint2	.	nonsynonymous SNV	Hint2:NM_026871:exon1:c.C38T:p.A13V	.	het	.	4	43656402	43656402	G	A	het	223.64	28
4	43696766	43696766	C	T	exonic	Olfr70	.	nonsynonymous SNV	Olfr70:NM_019485:exon2:c.G406A:p.V136M	.	het	.	4	43696766	43696766	C	T	het	286.64	27
4	43836257	43836257	C	T	exonic	Olfr157	.	nonsynonymous SNV	Olfr157:NM_019475:exon1:c.G232A:p.V78I	.	het	.	4	43836257	43836257	C	T	het	172.64	15
4	43938905	43938905	A	C	exonic	Reck	.	nonsynonymous SNV	Reck:NM_016678:exon18:c.A2270C:p.K757T	.	het	.	4	43938905	43938905	A	C	het	179.64	16
4	44340708	44340708	T	C	exonic	Melk	.	nonsynonymous SNV	Melk:NM_010790:exon12:c.T1004C:p.L335P	.	het	.	4	44340708	44340708	T	C	het	145.64	14
4	45906903	45906903	G	A	exonic	Ccdc180	.	nonsynonymous SNV	Ccdc180:NM_198660:exon13:c.G1377A:p.M459I	.	het	.	4	45906903	45906903	G	A	het	169.64	21
4	46629938	46629938	G	A	exonic	Tbc1d2	.	nonsynonymous SNV	Tbc1d2:NM_198664:exon4:c.C728T:p.S243L	.	het	.	4	46629938	46629938	G	A	het	165.64	19
4	46637641	46637641	C	T	exonic	Tbc1d2	.	nonsynonymous SNV	Tbc1d2:NM_198664:exon3:c.G604A:p.V202M	.	het	.	4	46637641	46637641	C	T	het	267.64	20
4	46649955	46649955	A	G	exonic	Tbc1d2	.	nonsynonymous SNV	Tbc1d2:NM_198664:exon1:c.T80C:p.V27A	.	het	.	4	46649955	46649955	A	G	het	99.64	19
4	49586148	49586148	G	T	exonic	Pgap4	.	nonsynonymous SNV	Pgap4:NM_001355503:exon2:c.C1019A:p.P340H,Pgap4:NM_025944:exon2:c.C1019A:p.P340H	.	het	.	4	49586148	49586148	G	T	het	37.64	12
4	55008895	55008895	C	T	exonic	Zfp462	.	nonsynonymous SNV	Zfp462:NM_172867:exon3:c.C860T:p.A287V	.	het	.	4	55008895	55008895	C	T	het	272.64	21
4	55012833	55012833	C	T	exonic	Zfp462	.	nonsynonymous SNV	Zfp462:NM_172867:exon3:c.C4798T:p.P1600S	.	het	.	4	55012833	55012833	C	T	het	104.64	14
4	55013503	55013503	T	C	exonic	Zfp462	.	nonsynonymous SNV	Zfp462:NM_172867:exon3:c.T5468C:p.V1823A	.	het	.	4	55013503	55013503	T	C	het	137.64	26
4	55370267	55370267	G	A	exonic	Rad23b	.	nonsynonymous SNV	Rad23b:NM_009011:exon4:c.G292A:p.A98T	.	het	.	4	55370267	55370267	G	A	het	57.64	18
4	55370327	55370327	C	G	exonic	Rad23b	.	nonsynonymous SNV	Rad23b:NM_009011:exon4:c.C352G:p.P118A	.	het	.	4	55370327	55370327	C	G	het	204.64	23
4	55370354	55370354	G	A	exonic	Rad23b	.	nonsynonymous SNV	Rad23b:NM_009011:exon4:c.G379A:p.A127T	.	het	.	4	55370354	55370354	G	A	het	201.64	24
4	57855090	57855090	C	G	exonic	Pakap	.	nonsynonymous SNV	Pakap:NM_001035533:exon1:c.C418G:p.Q140E,Pakap:NM_001035532:exon2:c.C418G:p.Q140E,Pakap:NM_009649:exon2:c.C418G:p.Q140E,Pakap:NM_001304544:exon7:c.C1006G:p.Q336E,Pakap:NM_001384150:exon8:c.C1006G:p.Q336E,Pakap:NM_001384157:exon8:c.C1012G:p.Q338E	.	het	.	4	57855090	57855090	C	G	het	45.64	26
4	58354200	58354200	A	G	exonic	Musk	.	nonsynonymous SNV	Musk:NM_001037130:exon8:c.A1177G:p.I393V,Musk:NM_001165996:exon8:c.A1177G:p.I393V,Musk:NM_010944:exon8:c.A1177G:p.I393V,Musk:NM_001037128:exon9:c.A1207G:p.I403V,Musk:NM_001037129:exon9:c.A1207G:p.I403V,Musk:NM_001037127:exon10:c.A1252G:p.I418V	.	het	.	4	58354200	58354200	A	G	het	144.64	12
4	58373699	58373699	A	G	exonic	Musk	.	nonsynonymous SNV	Musk:NM_001037130:exon13:c.A2569G:p.T857A,Musk:NM_001037129:exon14:c.A2599G:p.T867A,Musk:NM_010944:exon14:c.A2593G:p.T865A,Musk:NM_001037128:exon15:c.A2623G:p.T875A,Musk:NM_001037127:exon16:c.A2668G:p.T890A	.	het	.	4	58373699	58373699	A	G	het	67.64	20
4	59315731	59315731	A	G	exonic	Susd1	.	nonsynonymous SNV	Susd1:NM_001163288:exon16:c.T2239C:p.F747L	.	het	.	4	59315731	59315731	A	G	het	162.64	25
4	59914102	59914102	C	G	exonic	Slc46a2	.	nonsynonymous SNV	Slc46a2:NM_021053:exon1:c.G820C:p.G274R	.	het	.	4	59914102	59914102	C	G	het	144.64	16
4	63224884	63224884	G	A	exonic	Col27a1	.	nonsynonymous SNV	Col27a1:NM_025685:exon3:c.T808A:p.L270M	.	het	.	4	63224884	63224884	G	A	het	22.64	17
4	63225227	63225227	A	G	exonic	Col27a1	.	nonsynonymous SNV	Col27a1:NM_025685:exon3:c.C1151G:p.T384S	.	het	.	4	63225227	63225227	A	G	het	53.64	19
4	63225274	63225274	G	A	exonic	Col27a1	.	nonsynonymous SNV	Col27a1:NM_025685:exon3:c.C1198A:p.Q400K	.	het	.	4	63225274	63225274	G	A	het	124.64	16
4	63225307	63225307	G	A	exonic	Col27a1	.	nonsynonymous SNV	Col27a1:NM_025685:exon3:c.C1231A:p.P411T	.	het	.	4	63225307	63225307	G	A	het	88.64	13
4	63225362	63225362	T	G	exonic	Col27a1	.	nonsynonymous SNV	Col27a1:NM_025685:exon3:c.C1286G:p.P429R	.	het	.	4	63225362	63225362	T	G	het	112.64	17
4	63225907	63225907	0	G	exonic	Col27a1	.	nonsynonymous SNV	Col27a1:NM_025685:exon3:c.C1831G:p.P611A	.	het	.	4	63225907	63225907	-	G	het	47.60	12
4	63293507	63293507	T	C	exonic	Col27a1	.	nonsynonymous SNV	Col27a1:NM_025685:exon27:c.G3080C:p.G1027A	.	het	.	4	63293507	63293507	T	C	het	133.64	28
4	63293510	63293510	A	G	exonic	Col27a1	.	nonsynonymous SNV	Col27a1:NM_025685:exon27:c.A3083G:p.E1028G	.	het	.	4	63293510	63293510	A	G	het	130.64	29
4	63302374	63302374	G	A	exonic	Col27a1	.	nonsynonymous SNV	Col27a1:NM_025685:exon33:c.C3355A:p.Q1119K	.	het	.	4	63302374	63302374	G	A	het	58.64	23
4	63302392	63302392	C	T	exonic	Col27a1	.	nonsynonymous SNV	Col27a1:NM_025685:exon33:c.G3373T:p.V1125F	.	het	.	4	63302392	63302392	C	T	het	41.64	26
4	63323471	63323471	G	A	exonic	Col27a1	.	nonsynonymous SNV	Col27a1:NM_025685:exon50:c.C4563A:p.F1521L	.	het	.	4	63323471	63323471	G	A	het	55.64	32
4	63327835	63327835	T	C	exonic	Col27a1	.	nonsynonymous SNV	Col27a1:NM_025685:exon57:c.A4833C:p.Q1611H	.	het	.	4	63327835	63327835	T	C	het	60.64	18
4	63328676	63328676	T	C	exonic	Col27a1	.	nonsynonymous SNV	Col27a1:NM_025685:exon58:c.A5035C:p.M1679L	.	het	.	4	63328676	63328676	T	C	het	157.64	20
4	63395619	63395619	A	G	exonic	Akna	.	nonsynonymous SNV	Akna:NM_001305432:exon2:c.A266C:p.D89A,Akna:NM_001045514:exon3:c.A266C:p.D89A	.	het	.	4	63395619	63395619	A	G	het	81.64	10
4	81303651	81303651	T	C	exonic	Mpdz	.	nonsynonymous SNV	Mpdz:NM_001305286:exon31:c.C4271G:p.S1424C,Mpdz:NM_010820:exon32:c.C4370G:p.S1457C,Mpdz:NM_001305284:exon33:c.C4412G:p.S1471C	.	het	.	4	81303651	81303651	T	C	het	40.64	11
4	83247665	83247665	A	G	exonic	Ttc39b	.	nonsynonymous SNV	Ttc39b:NM_027238:exon9:c.T683C:p.F228S	.	het	.	4	83247665	83247665	A	G	het	262.64	11
4	83417818	83417818	T	G	exonic	Snapc3	.	nonsynonymous SNV	Snapc3:NM_001358795:exon1:c.C66G:p.H22Q,Snapc3:NM_029949:exon1:c.C66G:p.H22Q	.	het	.	4	83417818	83417818	T	G	het	39.64	10
4	83418053	83418053	G	A	exonic	Snapc3	.	nonsynonymous SNV	Snapc3:NM_001358795:exon1:c.G301A:p.G101S,Snapc3:NM_029949:exon1:c.G301A:p.G101S	.	het	.	4	83418053	83418053	G	A	het	206.64	10
4	83681072	83681072	T	G	exonic	Ccdc171	.	nonsynonymous SNV	Ccdc171:NM_001355549:exon16:c.T350G:p.L117R,Ccdc171:NM_001355378:exon17:c.T2147G:p.L716R	.	het	.	4	83681072	83681072	T	G	het	211.64	10
4	88720244	88720244	T	G	exonic	Klhl9	.	nonsynonymous SNV	Klhl9:NM_172871:exon1:c.A1759C:p.I587L	.	hom	.	4	88720244	88720244	T	G	hom	530.06	19
4	98733486	98733486	C	A	exonic	L1td1	.	nonsynonymous SNV	L1td1:NM_001081202:exon3:c.T284A:p.I95N	.	het	.	4	98733486	98733486	C	A	het	153.64	13
4	98733624	98733624	C	T	exonic	L1td1	.	nonsynonymous SNV	L1td1:NM_001081202:exon3:c.A422T:p.K141I	.	het	.	4	98733624	98733624	C	T	het	38.64	15
4	98734060	98734060	G	A	exonic	L1td1	.	nonsynonymous SNV	L1td1:NM_001081202:exon3:c.C858A:p.N286K	.	het	.	4	98734060	98734060	G	A	het	180.64	30
4	101184400	101184400	A	G	exonic	Jak1	.	nonsynonymous SNV	Jak1:NM_013567:exon5:c.G420C:p.K140N,Jak1:NM_146145:exon5:c.G420C:p.K140N	.	het	.	4	101184400	101184400	A	G	het	26.64	13
4	106362718	106362718	T	C	exonic	Usp24	.	nonsynonymous SNV	Usp24:NM_183225:exon16:c.A1834C:p.K612Q	.	het	.	4	106362718	106362718	T	C	het	63.64	17
4	106485172	106485172	G	A	exonic	Bsnd	.	nonsynonymous SNV	Bsnd:NM_080458:exon4:c.G798T:p.E266D	.	het	.	4	106485172	106485172	G	A	het	41.64	23
4	106486702	106486702	A	G	exonic	Bsnd	.	nonsynonymous SNV	Bsnd:NM_080458:exon3:c.G406C:p.G136R	.	het	.	4	106486702	106486702	A	G	het	117.64	10
4	106690982	106690982	0	T	exonic	Mroh7	.	nonsynonymous SNV	Mroh7:NM_001126487:exon20:c.G3298A:p.V1100M	.	het	.	4	106690982	106690982	-	T	het	65.60	13
4	106709643	106709643	0	T	exonic	Mroh7	.	nonsynonymous SNV	Mroh7:NM_001126487:exon7:c.C1408A:p.L470M	.	het	.	4	106709643	106709643	-	T	het	33.60	13
4	106758321	106758321	A	C	exonic	Acot11	.	nonsynonymous SNV	Acot11:NM_001347159:exon8:c.A932G:p.N311S,Acot11:NM_025590:exon8:c.A872G:p.N291S	.	het	.	4	106758321	106758321	A	C	het	250.64	27
4	106760154	106760154	A	G	exonic	Acot11	.	nonsynonymous SNV	Acot11:NM_001347159:exon7:c.G754C:p.A252P,Acot11:NM_025590:exon7:c.G694C:p.A232P	.	het	.	4	106760154	106760154	A	G	het	84.64	10
4	107879933	107879933	A	C	exonic	Magoh	.	nonsynonymous SNV	Magoh:NM_001282737:exon1:c.T76C:p.F26L	.	het	.	4	107879933	107879933	A	C	het	272.64	33
4	107880896	107880896	0	C	exonic	Magoh	.	nonsynonymous SNV	Magoh:NM_001282737:exon2:c.A92C:p.K31T	.	het	.	4	107880896	107880896	-	C	het	65.60	16
4	107880941	107880941	A	G	exonic	Magoh	.	nonsynonymous SNV	Magoh:NM_001282737:exon2:c.T137G:p.I46S	.	het	.	4	107880941	107880941	A	G	het	40.64	14
4	107887233	107887233	A	G	exonic	Magoh	.	nonsynonymous SNV	Magoh:NM_001282737:exon5:c.T398G:p.V133G	.	het	.	4	107887233	107887233	A	G	het	74.64	12
4	107890040	107890040	C	G	exonic	Czib	.	nonsynonymous SNV	Czib:NM_028754:exon1:c.T36G:p.S12R	.	het	.	4	107890040	107890040	C	G	het	250.64	19
4	107890090	107890090	T	C	exonic	Czib	.	nonsynonymous SNV	Czib:NM_028754:exon1:c.G86C:p.C29S	.	het	.	4	107890090	107890090	T	C	het	101.64	22
4	107890119	107890119	T	C	exonic	Czib	.	nonsynonymous SNV	Czib:NM_028754:exon1:c.A115C:p.K39Q,Czib:NM_001347160:exon2:c.A7C:p.K3Q	.	het	.	4	107890119	107890119	T	C	het	161.64	15
4	107890122	107890122	A	G	exonic	Czib	.	nonsynonymous SNV	Czib:NM_028754:exon1:c.A118G:p.I40V,Czib:NM_001347160:exon2:c.A10G:p.I4V	.	het	.	4	107890122	107890122	A	G	het	161.64	15
4	108022550	108022550	T	C	exonic	Podn	.	nonsynonymous SNV	Podn:NM_001285956:exon8:c.C672G:p.I224M,Podn:NM_001285958:exon8:c.C672G:p.I224M,Podn:NM_172874:exon8:c.C672G:p.I224M	.	het	.	4	108022550	108022550	T	C	het	60.64	18
4	108523234	108523234	C	T	exonic	Tut4	.	nonsynonymous SNV	Tut4:NM_001379663:exon16:c.C3047T:p.S1016F,Tut4:NM_001379664:exon16:c.C3047T:p.S1016F,Tut4:NM_001379665:exon16:c.C3047T:p.S1016F,Tut4:NM_175472:exon17:c.C3047T:p.S1016F	.	het	.	4	108523234	108523234	C	T	het	96.64	12
4	111898627	111898627	C	T	exonic	Slc5a9	.	nonsynonymous SNV	Slc5a9:NM_145551:exon2:c.C73A:p.P25T	.	het	.	4	111898627	111898627	C	T	het	184.64	11
4	114925527	114925527	C	A	exonic	Foxe3	.	nonsynonymous SNV	Foxe3:NM_015758:exon1:c.G487T:p.A163S	.	het	.	4	114925527	114925527	C	A	het	129.64	25
4	115811080	115811080	0	C	exonic	Atpaf1	.	nonsynonymous SNV	Atpaf1:NM_001369233:exon9:c.G859C:p.V287L,Atpaf1:NM_181040:exon9:c.G931C:p.V311L	.	het	.	4	115811080	115811080	-	C	het	164.60	22
4	115833668	115833668	A	G	exonic	Mob3c	.	nonsynonymous SNV	Mob3c:NM_175308:exon3:c.A454G:p.T152A	.	het	.	4	115833668	115833668	A	G	het	157.64	30
4	116598754	116598754	0	T	exonic	Ccdc17	.	nonsynonymous SNV	Ccdc17:NM_001037916:exon9:c.A978T:p.R326S	.	het	.	4	116598754	116598754	-	T	het	86.60	10
4	117129041	117129041	A	G	exonic	Plk3	.	nonsynonymous SNV	Plk3:NM_001313916:exon15:c.G1842C:p.L614F,Plk3:NM_013807:exon15:c.G1893C:p.L631F	.	het	.	4	117129041	117129041	A	G	het	76.64	36
4	117863926	117863926	A	G	exonic	Slc6a9	.	nonsynonymous SNV	Slc6a9:NM_001355175:exon7:c.C929G:p.A310G,Slc6a9:NM_001369017:exon7:c.C677G:p.A226G,Slc6a9:NM_001369016:exon8:c.C872G:p.A291G,Slc6a9:NM_008135:exon8:c.C872G:p.A291G	.	het	.	4	117863926	117863926	A	G	het	79.64	11
4	117871829	117871829	T	C	exonic	Ccdc24	.	nonsynonymous SNV	Ccdc24:NM_001034876:exon3:c.C190G:p.P64A	.	het	.	4	117871829	117871829	T	C	het	268.64	28
4	117872025	117872025	C	T	exonic	Ccdc24	.	nonsynonymous SNV	Ccdc24:NM_001034876:exon2:c.T122A:p.L41H	.	het	.	4	117872025	117872025	C	T	het	181.64	20
4	117872052	117872052	C	T	exonic	Ccdc24	.	nonsynonymous SNV	Ccdc24:NM_001034876:exon2:c.T95A:p.L32H	.	het	.	4	117872052	117872052	C	T	het	139.64	19
4	117872137	117872137	C	T	exonic	Ccdc24	.	nonsynonymous SNV	Ccdc24:NM_001034876:exon2:c.G10A:p.A4T	.	het	.	4	117872137	117872137	C	T	het	176.64	25
4	117894780	117894780	T	C	exonic	Ipo13	.	nonsynonymous SNV	Ipo13:NM_146152:exon19:c.C2759G:p.P920R	.	het	.	4	117894780	117894780	T	C	het	102.64	15
4	117894811	117894811	C	T	exonic	Ipo13	.	nonsynonymous SNV	Ipo13:NM_146152:exon19:c.C2728A:p.P910T	.	het	.	4	117894811	117894811	C	T	het	37.64	15
4	117894812	117894812	G	A	exonic	Ipo13	.	nonsynonymous SNV	Ipo13:NM_146152:exon19:c.G2727T:p.Q909H	.	het	.	4	117894812	117894812	G	A	het	37.64	15
4	117897779	117897779	G	A	exonic	Ipo13	.	nonsynonymous SNV	Ipo13:NM_146152:exon15:c.C2386T:p.L796F	.	het	.	4	117897779	117897779	G	A	het	69.64	18
4	117897786	117897786	T	C	exonic	Ipo13	.	nonsynonymous SNV	Ipo13:NM_146152:exon15:c.T2379G:p.F793L	.	het	.	4	117897786	117897786	T	C	het	69.64	18
4	117901597	117901597	A	G	exonic	Ipo13	.	nonsynonymous SNV	Ipo13:NM_146152:exon12:c.G2070C:p.K690N	.	het	.	4	117901597	117901597	A	G	het	72.64	17
4	117905486	117905486	C	G	exonic	Ipo13	.	nonsynonymous SNV	Ipo13:NM_146152:exon3:c.G919C:p.G307R	.	het	.	4	117905486	117905486	C	G	het	251.64	21
4	117905524	117905524	G	T	exonic	Ipo13	.	nonsynonymous SNV	Ipo13:NM_146152:exon3:c.G881A:p.R294Q	.	het	.	4	117905524	117905524	G	T	het	292.64	20
4	118138980	118138980	T	G	exonic	Kdm4a	.	nonsynonymous SNV	Kdm4a:NM_001161823:exon20:c.T2851C:p.C951R	.	het	.	4	118138980	118138980	T	G	het	102.64	15
4	118217110	118217110	C	A	exonic	Ptprf	.	nonsynonymous SNV	Ptprf:NM_011213:exon22:c.G4026T:p.K1342N	.	het	.	4	118217110	118217110	C	A	het	142.64	22
4	118217127	118217127	C	T	exonic	Ptprf	.	nonsynonymous SNV	Ptprf:NM_011213:exon22:c.G4009A:p.A1337T	.	het	.	4	118217127	118217127	C	T	het	115.64	19
4	118223250	118223250	C	T	exonic	Ptprf	.	nonsynonymous SNV	Ptprf:NM_011213:exon20:c.T3806A:p.V1269D	.	het	.	4	118223250	118223250	C	T	het	84.64	27
4	118223271	118223271	T	C	exonic	Ptprf	.	nonsynonymous SNV	Ptprf:NM_011213:exon20:c.T3785G:p.V1262G	.	het	.	4	118223271	118223271	T	C	het	197.64	27
4	118223741	118223741	C	T	exonic	Ptprf	.	nonsynonymous SNV	Ptprf:NM_011213:exon19:c.T3652A:p.S1218T	.	het	.	4	118223741	118223741	C	T	het	184.64	41
4	118223762	118223762	G	T	exonic	Ptprf	.	nonsynonymous SNV	Ptprf:NM_011213:exon19:c.T3631A:p.Y1211N	.	het	.	4	118223762	118223762	G	T	het	211.64	40
4	118225868	118225868	C	T	exonic	Ptprf	.	nonsynonymous SNV	Ptprf:NM_011213:exon15:c.G2941A:p.A981T	.	het	.	4	118225868	118225868	C	T	het	65.64	15
4	118226303	118226303	T	G	exonic	Ptprf	.	nonsynonymous SNV	Ptprf:NM_011213:exon15:c.G2506C:p.E836Q	.	het	.	4	118226303	118226303	T	G	het	226.64	22
4	118231489	118231489	A	G	exonic	Ptprf	.	nonsynonymous SNV	Ptprf:NM_011213:exon12:c.G2116C:p.D706H	.	het	.	4	118231489	118231489	A	G	het	34.64	16
4	118231788	118231788	T	C	exonic	Ptprf	.	nonsynonymous SNV	Ptprf:NM_011213:exon12:c.C1817G:p.P606R	.	het	.	4	118231788	118231788	T	C	het	42.64	10
4	118234985	118234985	G	C	exonic	Ptprf	.	nonsynonymous SNV	Ptprf:NM_011213:exon11:c.C1787G:p.T596S	.	het	.	4	118234985	118234985	G	C	het	142.64	20
4	118235012	118235012	A	G	exonic	Ptprf	.	nonsynonymous SNV	Ptprf:NM_011213:exon11:c.A1760C:p.D587A	.	het	.	4	118235012	118235012	A	G	het	218.64	23
4	118235019	118235019	G	C	exonic	Ptprf	.	nonsynonymous SNV	Ptprf:NM_011213:exon11:c.C1753G:p.R585G	.	het	.	4	118235019	118235019	G	C	het	226.64	20
4	118235066	118235066	C	T	exonic	Ptprf	.	nonsynonymous SNV	Ptprf:NM_011213:exon11:c.T1706A:p.L569Q	.	het	.	4	118235066	118235066	C	T	het	123.64	23
4	118235666	118235666	C	T	exonic	Ptprf	.	nonsynonymous SNV	Ptprf:NM_011213:exon10:c.C1551A:p.D517E	.	het	.	4	118235666	118235666	C	T	het	255.64	24
4	118385305	118385305	0	T	exonic	Szt2	.	nonsynonymous SNV	Szt2:NM_198170:exon32:c.G4480A:p.D1494N	.	het	.	4	118385305	118385305	-	T	het	89.60	15
4	118390566	118390566	C	G	exonic	Szt2	.	nonsynonymous SNV	Szt2:NM_198170:exon16:c.G2384C:p.R795P	.	het	.	4	118390566	118390566	C	G	het	60.64	18
4	118390826	118390826	A	G	exonic	Szt2	.	nonsynonymous SNV	Szt2:NM_198170:exon15:c.G2200C:p.D734H	.	het	.	4	118390826	118390826	A	G	het	126.64	19
4	118402883	118402883	C	G	exonic	Szt2	.	nonsynonymous SNV	Szt2:NM_198170:exon3:c.T265C:p.F89L	.	het	.	4	118402883	118402883	C	G	het	229.64	19
4	118410928	118410928	T	C	exonic	Med8	.	nonsynonymous SNV	Med8:NM_020000:exon2:c.A50C:p.N17T,Med8:NM_173719:exon2:c.A50C:p.N17T	.	het	.	4	118410928	118410928	T	C	het	180.64	11
4	118430519	118430519	C	T	exonic	Elovl1	.	nonsynonymous SNV	Elovl1:NM_001039176:exon2:c.G10T:p.V4F,Elovl1:NM_019422:exon2:c.G10T:p.V4F	.	het	.	4	118430519	118430519	C	T	het	121.64	17
4	118443439	118443439	C	G	exonic	Mpl	.	nonsynonymous SNV	Mpl:NM_001122949:exon12:c.A1892C:p.Q631P,Mpl:NM_001285496:exon12:c.A1712C:p.Q571P,Mpl:NM_010823:exon12:c.A1868C:p.Q623P	.	het	.	4	118443439	118443439	C	G	het	78.64	15
4	118443452	118443452	A	T	exonic	Mpl	.	nonsynonymous SNV	Mpl:NM_001122949:exon12:c.C1879A:p.L627I,Mpl:NM_001285496:exon12:c.C1699A:p.L567I,Mpl:NM_010823:exon12:c.C1855A:p.L619I	.	het	.	4	118443452	118443452	A	T	het	106.64	16
4	118443531	118443531	G	A	exonic	Mpl	.	nonsynonymous SNV	Mpl:NM_001122949:exon12:c.G1800T:p.M600I,Mpl:NM_001285496:exon12:c.G1620T:p.M540I,Mpl:NM_010823:exon12:c.G1776T:p.M592I	.	het	.	4	118443531	118443531	G	A	het	72.64	14
4	118443667	118443667	T	C	exonic	Mpl	.	nonsynonymous SNV	Mpl:NM_001122949:exon12:c.T1664G:p.V555G,Mpl:NM_001285496:exon12:c.T1484G:p.V495G,Mpl:NM_010823:exon12:c.T1640G:p.V547G	.	het	.	4	118443667	118443667	T	C	het	223.64	13
4	118443671	118443671	G	A	exonic	Mpl	.	nonsynonymous SNV	Mpl:NM_001122949:exon12:c.A1660T:p.T554S,Mpl:NM_001285496:exon12:c.A1480T:p.T494S,Mpl:NM_010823:exon12:c.A1636T:p.T546S	.	het	.	4	118443671	118443671	G	A	het	223.64	13
4	118478559	118478559	G	A	exonic	Tie1	.	nonsynonymous SNV	Tie1:NM_011587:exon14:c.A2236T:p.S746C	.	het	.	4	118478559	118478559	G	A	het	255.64	21
4	118478874	118478874	G	A	exonic	Tie1	.	nonsynonymous SNV	Tie1:NM_011587:exon13:c.A2194T:p.T732S	.	het	.	4	118478874	118478874	G	A	het	119.64	12
4	118478885	118478885	A	T	exonic	Tie1	.	nonsynonymous SNV	Tie1:NM_011587:exon13:c.T2183A:p.V728E	.	het	.	4	118478885	118478885	A	T	het	142.64	10
4	118599049	118599049	C	T	exonic	Cfap57	.	nonsynonymous SNV	Cfap57:NM_026789:exon9:c.C1447A:p.H483N	.	het	.	4	118599049	118599049	C	T	het	118.64	11
4	118735407	118735407	C	A	exonic	Olfr1339	.	nonsynonymous SNV	Olfr1339:NM_146852:exon1:c.T877A:p.Y293N	.	het	.	4	118735407	118735407	C	A	het	128.64	12
4	118934158	118934158	0	G	exonic	Olfr1328	.	nonsynonymous SNV	Olfr1328:NM_146399:exon1:c.A683C:p.K228T	.	het	.	4	118934158	118934158	-	G	het	22.60	15
4	118934183	118934183	T	C	exonic	Olfr1328	.	nonsynonymous SNV	Olfr1328:NM_146399:exon1:c.A658G:p.I220V	.	het	.	4	118934183	118934183	T	C	het	67.64	14
4	119136282	119136282	G	T	exonic	Slc2a1	.	nonsynonymous SNV	Slc2a1:NM_011400:exon10:c.G1315T:p.V439L	.	het	.	4	119136282	119136282	G	T	het	46.64	12
4	119136288	119136288	T	G	exonic	Slc2a1	.	nonsynonymous SNV	Slc2a1:NM_011400:exon10:c.C1321G:p.L441V	.	het	.	4	119136288	119136288	T	G	het	46.64	12
4	120565409	120565409	A	G	exonic	Ctps	.	nonsynonymous SNV	Ctps:NM_001355491:exon3:c.A197C:p.E66A,Ctps:NM_016748:exon3:c.A197C:p.E66A	.	het	.	4	120565409	120565409	A	G	het	147.64	19
4	120600712	120600712	C	T	exonic	Gm8439	.	nonsynonymous SNV	Gm8439:NM_001101603:exon2:c.G49T:p.V17L	.	het	.	4	120600712	120600712	C	T	het	203.64	34
4	123212217	123212217	G	T	exonic	Nt5c1a	.	nonsynonymous SNV	Nt5c1a:NM_001085502:exon4:c.A463T:p.S155C	.	het	.	4	123212217	123212217	G	T	het	43.64	13
4	125055230	125055230	C	T	exonic	Gnl2	.	nonsynonymous SNV	Gnl2:NM_145552:exon16:c.G2081T:p.R694L	.	het	.	4	125055230	125055230	C	T	het	191.64	18
4	125102899	125102899	A	G	exonic	Meaf6	.	nonsynonymous SNV	Meaf6:NM_001290701:exon5:c.A401G:p.E134G,Meaf6:NM_001374123:exon5:c.A401G:p.E134G,Meaf6:NM_027310:exon5:c.A401G:p.E134G	.	het	.	4	125102899	125102899	A	G	het	69.64	10
4	125119353	125119353	A	G	exonic	Zc3h12a	.	nonsynonymous SNV	Zc3h12a:NM_153159:exon6:c.T1717C:p.F573L	.	het	.	4	125119353	125119353	A	G	het	32.64	14
4	125126667	125126667	T	G	exonic	Zc3h12a	.	nonsynonymous SNV	Zc3h12a:NM_153159:exon2:c.G382C:p.E128Q	.	het	.	4	125126667	125126667	T	G	het	263.64	11
4	125623507	125623507	C	G	exonic	Grik3	.	nonsynonymous SNV	Grik3:NM_001081097:exon2:c.C142G:p.P48A	.	het	.	4	125623507	125623507	C	G	het	60.64	21
4	125704474	125704474	T	A	exonic	Grik3	.	nonsynonymous SNV	Grik3:NM_001081097:exon14:c.T2233A:p.Y745N	.	het	.	4	125704474	125704474	T	A	het	126.64	23
4	126125792	126125792	G	T	exonic	Stk40	.	nonsynonymous SNV	Stk40:NM_028800:exon4:c.G316T:p.V106L,Stk40:NM_001145827:exon6:c.G358T:p.V120L	.	het	.	4	126125792	126125792	G	T	het	162.64	14
4	127128869	127128869	A	G	exonic	Tmem35b	.	nonsynonymous SNV	Tmem35b:NM_001099319:exon3:c.T302G:p.L101R	.	het	.	4	127128869	127128869	A	G	het	165.64	13
4	127128944	127128944	G	A	exonic	Tmem35b	.	nonsynonymous SNV	Tmem35b:NM_001099319:exon3:c.C377A:p.S126Y	.	het	.	4	127128944	127128944	G	A	het	84.64	16
4	127312013	127312013	A	T	exonic	Gja4	.	nonsynonymous SNV	Gja4:NM_008120:exon2:c.C956A:p.S319Y	.	het	.	4	127312013	127312013	A	T	het	156.64	16
4	127312945	127312945	A	G	exonic	Gja4	.	nonsynonymous SNV	Gja4:NM_008120:exon2:c.G24C:p.E8D	.	het	.	4	127312945	127312945	A	G	het	262.64	20
4	128291389	128291389	T	C	exonic	Csmd2	.	nonsynonymous SNV	Csmd2:NM_001281955:exon7:c.G1059C:p.Q353H	.	het	.	4	128291389	128291389	T	C	het	136.64	23
4	128368991	128368991	T	G	exonic	Csmd2	.	nonsynonymous SNV	Csmd2:NM_001281955:exon14:c.C1969G:p.P657A	.	het	.	4	128368991	128368991	T	G	het	201.64	20
4	128474880	128474880	G	A	exonic	Csmd2	.	nonsynonymous SNV	Csmd2:NM_001281955:exon35:c.C5598A:p.N1866K	.	het	.	4	128474880	128474880	G	A	het	93.64	10
4	128486909	128486909	G	T	exonic	Csmd2	.	nonsynonymous SNV	Csmd2:NM_001281955:exon41:c.G6257T:p.S2086I	.	het	.	4	128486909	128486909	G	T	het	220.64	19
4	128496033	128496033	G	A	exonic	Csmd2	.	nonsynonymous SNV	Csmd2:NM_001281955:exon43:c.G6560A:p.G2187E	.	het	.	4	128496033	128496033	G	A	het	87.64	12
4	128618403	128618403	C	T	exonic	Tlr12	.	nonsynonymous SNV	Tlr12:NM_205823:exon1:c.C53A:p.T18N	.	het	.	4	128618403	128618403	C	T	het	201.64	20
4	129472753	129472753	G	C	exonic	Bsdc1	.	nonsynonymous SNV	Bsdc1:NM_133889:exon8:c.A653C:p.E218A	.	het	.	4	129472753	129472753	G	C	het	33.64	15
4	129485085	129485085	C	G	exonic	Bsdc1	.	nonsynonymous SNV	Bsdc1:NM_133889:exon10:c.A1196G:p.D399G	.	het	.	4	129485085	129485085	C	G	het	40.64	14
4	129485115	129485115	T	C	exonic	Bsdc1	.	nonsynonymous SNV	Bsdc1:NM_133889:exon10:c.T1226C:p.L409P	.	het	.	4	129485115	129485115	T	C	het	40.64	11
4	129489094	129489094	G	A	exonic	Tssk3	.	nonsynonymous SNV	Tssk3:NM_080442:exon2:c.C784T:p.H262Y	.	het	.	4	129489094	129489094	G	A	het	178.64	23
4	129489277	129489277	C	G	exonic	Tssk3	.	nonsynonymous SNV	Tssk3:NM_080442:exon2:c.T601C:p.Y201H	.	het	.	4	129489277	129489277	C	G	het	86.64	23
4	129489358	129489358	A	G	exonic	Tssk3	.	nonsynonymous SNV	Tssk3:NM_080442:exon2:c.G520C:p.A174P	.	het	.	4	129489358	129489358	A	G	het	194.64	28
4	129489508	129489508	C	T	exonic	Tssk3	.	nonsynonymous SNV	Tssk3:NM_080442:exon2:c.T370A:p.Y124N	.	het	.	4	129489508	129489508	C	T	het	78.64	12
4	129489583	129489583	C	T	exonic	Tssk3	.	nonsynonymous SNV	Tssk3:NM_080442:exon2:c.T295A:p.C99S	.	het	.	4	129489583	129489583	C	T	het	69.64	15
4	129515140	129515140	T	C	exonic	Marcksl1	.	nonsynonymous SNV	Marcksl1:NM_010807:exon2:c.G511C:p.E171Q	.	het	.	4	129515140	129515140	T	C	het	90.64	22
4	129516619	129516619	A	G	exonic	Hdac1	.	nonsynonymous SNV	Hdac1:NM_008228:exon14:c.A1439C:p.K480T	.	het	.	4	129516619	129516619	A	G	het	322.64	25
4	129516628	129516628	C	G	exonic	Hdac1	.	nonsynonymous SNV	Hdac1:NM_008228:exon14:c.A1430C:p.E477A	.	het	.	4	129516628	129516628	C	G	het	322.64	25
4	129516912	129516912	A	C	exonic	Hdac1	.	nonsynonymous SNV	Hdac1:NM_008228:exon13:c.C1409G:p.P470R	.	het	.	4	129516912	129516912	A	C	het	138.64	19
4	129516946	129516946	G	A	exonic	Hdac1	.	nonsynonymous SNV	Hdac1:NM_008228:exon13:c.G1375T:p.V459F	.	het	.	4	129516946	129516946	G	A	het	147.64	19
4	129518869	129518869	A	G	exonic	Hdac1	.	nonsynonymous SNV	Hdac1:NM_008228:exon9:c.A941C:p.Y314S	.	het	.	4	129518869	129518869	A	G	het	163.64	18
4	129518882	129518882	C	T	exonic	Hdac1	.	nonsynonymous SNV	Hdac1:NM_008228:exon9:c.C928A:p.R310S	.	het	.	4	129518882	129518882	C	T	het	159.64	18
4	129519135	129519135	C	T	exonic	Hdac1	.	nonsynonymous SNV	Hdac1:NM_008228:exon8:c.T755A:p.F252Y	.	het	.	4	129519135	129519135	C	T	het	174.64	13
4	129521437	129521437	0	A	exonic	Hdac1	.	nonsynonymous SNV	Hdac1:NM_008228:exon7:c.A710T:p.Y237F	.	het	.	4	129521437	129521437	-	A	het	264.60	17
4	129577087	129577087	T	C	exonic	Fam167b	.	nonsynonymous SNV	Fam167b:NM_182783:exon2:c.C467G:p.A156G	.	het	.	4	129577087	129577087	T	C	het	275.64	13
4	129577174	129577174	0	C	exonic	Fam167b	.	nonsynonymous SNV	Fam167b:NM_182783:exon2:c.A380G:p.E127G	.	het	.	4	129577174	129577174	-	C	het	194.60	11
4	129577192	129577192	A	G	exonic	Fam167b	.	nonsynonymous SNV	Fam167b:NM_182783:exon2:c.A362C:p.E121A	.	het	.	4	129577192	129577192	A	G	het	200.64	11
4	129577252	129577252	T	C	exonic	Fam167b	.	nonsynonymous SNV	Fam167b:NM_182783:exon2:c.T302G:p.L101R	.	het	.	4	129577252	129577252	T	C	het	159.64	15
4	129578210	129578210	T	C	exonic	Fam167b	.	nonsynonymous SNV	Fam167b:NM_182783:exon1:c.A166G:p.R56G	.	het	.	4	129578210	129578210	T	C	het	165.64	24
4	129676691	129676691	T	C	exonic	Tmem39b	.	nonsynonymous SNV	Tmem39b:NM_199305:exon9:c.C1354G:p.L452V,Tmem39b:NM_001356378:exon10:c.C1009G:p.L337V	.	het	.	4	129676691	129676691	T	C	het	75.64	13
4	129845079	129845079	C	A	exonic	Ptp4a2	.	nonsynonymous SNV	Ptp4a2:NM_001164745:exon4:c.T207A:p.D69E,Ptp4a2:NM_008974:exon4:c.T207A:p.D69E	.	het	.	4	129845079	129845079	C	A	het	256.64	21
4	130360245	130360245	G	A	exonic	Snrnp40	.	nonsynonymous SNV	Snrnp40:NM_025645:exon1:c.C40A:p.L14M	.	het	.	4	130360245	130360245	G	A	het	52.64	10
4	132550401	132550401	T	C	exonic	Dnajc8	.	nonsynonymous SNV	Dnajc8:NM_172400:exon7:c.A496C:p.T166P	.	het	.	4	132550401	132550401	T	C	het	35.64	10
4	132783470	132783470	C	A	exonic	Themis2	.	nonsynonymous SNV	Themis2:NM_001033308:exon5:c.G1760T:p.C587F	.	het	.	4	132783470	132783470	C	A	het	107.64	16
4	132785562	132785562	C	T	exonic	Themis2	.	nonsynonymous SNV	Themis2:NM_001033308:exon4:c.C1352A:p.S451Y	.	het	.	4	132785562	132785562	C	T	het	248.64	28
4	132786078	132786078	A	G	exonic	Themis2	.	nonsynonymous SNV	Themis2:NM_001033308:exon4:c.T836C:p.V279A	.	het	.	4	132786078	132786078	A	G	het	157.64	18
4	132786163	132786163	A	G	exonic	Themis2	.	nonsynonymous SNV	Themis2:NM_001033308:exon4:c.G751C:p.V251L	.	het	.	4	132786163	132786163	A	G	het	63.64	17
4	132789582	132789582	T	C	exonic	Themis2	.	nonsynonymous SNV	Themis2:NM_001033308:exon3:c.C606G:p.I202M	.	het	.	4	132789582	132789582	T	C	het	385.64	35
4	132830657	132830657	T	A	exonic	Ppp1r8	.	nonsynonymous SNV	Ppp1r8:NM_001290725:exon5:c.C605T:p.T202I,Ppp1r8:NM_001355198:exon5:c.C683T:p.T228I,Ppp1r8:NM_001355199:exon5:c.C683T:p.T228I,Ppp1r8:NM_146154:exon5:c.C605T:p.T202I	.	het	.	4	132830657	132830657	T	A	het	100.64	17
4	132840682	132840682	A	C	exonic	Ppp1r8	.	nonsynonymous SNV	Ppp1r8:NM_001290725:exon2:c.T79G:p.L27V,Ppp1r8:NM_001355198:exon2:c.T157G:p.L53V,Ppp1r8:NM_001355199:exon2:c.T157G:p.L53V,Ppp1r8:NM_146154:exon2:c.T79G:p.L27V	.	het	.	4	132840682	132840682	A	C	het	89.64	22
4	132855516	132855516	T	C	exonic	Stx12	.	nonsynonymous SNV	Stx12:NM_133887:exon9:c.T775G:p.S259A	.	het	.	4	132855516	132855516	T	C	het	128.64	12
4	132857379	132857379	C	T	exonic	Stx12	.	nonsynonymous SNV	Stx12:NM_133887:exon8:c.G653A:p.S218N	.	het	.	4	132857379	132857379	C	T	het	145.64	14
4	132903934	132903934	G	C	exonic	Fam76a	.	nonsynonymous SNV	Fam76a:NM_001163792:exon6:c.T612G:p.H204Q,Fam76a:NM_145553:exon7:c.T699G:p.H233Q	.	het	.	4	132903934	132903934	G	C	het	50.64	11
4	132916183	132916183	T	C	exonic	Fam76a	.	nonsynonymous SNV	Fam76a:NM_001163792:exon4:c.C290G:p.P97R,Fam76a:NM_145553:exon4:c.C290G:p.P97R	.	het	.	4	132916183	132916183	T	C	het	177.64	14
4	133066031	133066031	G	A	exonic	Ahdc1	.	nonsynonymous SNV	Ahdc1:NM_146155:exon6:c.G4582A:p.G1528S	.	het	.	4	133066031	133066031	G	A	het	37.64	11
4	133176516	133176516	A	G	exonic	Wasf2	.	nonsynonymous SNV	Wasf2:NM_153423:exon2:c.C34G:p.H12D	.	het	.	4	133176516	133176516	A	G	het	63.64	17
4	133176573	133176573	T	C	exonic	Wasf2	.	nonsynonymous SNV	Wasf2:NM_153423:exon2:c.A91C:p.I31L	.	het	.	4	133176573	133176573	T	C	het	127.64	15
4	133176585	133176585	0	T	exonic	Wasf2	.	nonsynonymous SNV	Wasf2:NM_153423:exon2:c.A103T:p.N35Y	.	het	.	4	133176585	133176585	-	T	het	127.60	15
4	133176604	133176604	T	C	exonic	Wasf2	.	nonsynonymous SNV	Wasf2:NM_153423:exon2:c.G122C:p.G41A	.	het	.	4	133176604	133176604	T	C	het	91.64	12
4	133176607	133176607	C	T	exonic	Wasf2	.	nonsynonymous SNV	Wasf2:NM_153423:exon2:c.G125T:p.S42I	.	het	.	4	133176607	133176607	C	T	het	91.64	12
4	133185037	133185037	A	G	exonic	Wasf2	.	nonsynonymous SNV	Wasf2:NM_153423:exon3:c.T199G:p.S67A	.	het	.	4	133185037	133185037	A	G	het	376.64	22
4	133185728	133185728	C	T	exonic	Wasf2	.	nonsynonymous SNV	Wasf2:NM_153423:exon4:c.C395T:p.P132L	.	het	.	4	133185728	133185728	C	T	het	173.64	24
4	133192118	133192118	A	G	exonic	Wasf2	.	nonsynonymous SNV	Wasf2:NM_153423:exon7:c.T682G:p.L228V	.	het	.	4	133192118	133192118	A	G	het	118.64	18
4	133194644	133194644	A	G	exonic	Wasf2	.	nonsynonymous SNV	Wasf2:NM_153423:exon8:c.A1073G:p.D358G	.	het	.	4	133194644	133194644	A	G	het	42.64	12
4	133245787	133245787	T	C	exonic	Map3k6	.	nonsynonymous SNV	Map3k6:NM_016693:exon8:c.G1155C:p.K385N	.	het	.	4	133245787	133245787	T	C	het	111.64	19
4	133245794	133245794	T	C	exonic	Map3k6	.	nonsynonymous SNV	Map3k6:NM_016693:exon8:c.G1162C:p.D388H	.	het	.	4	133245794	133245794	T	C	het	111.64	19
4	133255623	133255623	G	A	exonic	Sytl1	.	nonsynonymous SNV	Sytl1:NM_031393:exon13:c.A1271T:p.Q424L	.	het	.	4	133255623	133255623	G	A	het	152.64	18
4	133261022	133261022	A	G	exonic	Sytl1	.	nonsynonymous SNV	Sytl1:NM_031393:exon2:c.T22C:p.S8P	.	het	.	4	133261022	133261022	A	G	het	178.64	26
4	133297564	133297564	A	G	exonic	Wdtc1	.	nonsynonymous SNV	Wdtc1:NM_199306:exon13:c.T1321C:p.C441R	.	het	.	4	133297564	133297564	A	G	het	52.64	10
4	133301757	133301757	C	T	exonic	Wdtc1	.	nonsynonymous SNV	Wdtc1:NM_199306:exon11:c.C1017A:p.S339R	.	het	.	4	133301757	133301757	C	T	het	30.64	21
4	133305837	133305837	A	G	exonic	Wdtc1	.	nonsynonymous SNV	Wdtc1:NM_199306:exon7:c.A649C:p.I217L	.	het	.	4	133305837	133305837	A	G	het	80.64	13
4	133305944	133305944	G	A	exonic	Wdtc1	.	nonsynonymous SNV	Wdtc1:NM_199306:exon7:c.G542T:p.C181F	.	het	.	4	133305944	133305944	G	A	het	115.64	12
4	133308795	133308795	G	A	exonic	Wdtc1	.	nonsynonymous SNV	Wdtc1:NM_199306:exon6:c.A433T:p.M145L	.	het	.	4	133308795	133308795	G	A	het	139.64	10
4	133308914	133308914	G	A	exonic	Wdtc1	.	nonsynonymous SNV	Wdtc1:NM_199306:exon6:c.G314T:p.R105L	.	het	.	4	133308914	133308914	G	A	het	196.64	14
4	133422254	133422254	T	C	exonic	Slc9a1	.	nonsynonymous SNV	Slc9a1:NM_001358455:exon12:c.A1361C:p.Q454P,Slc9a1:NM_016981:exon12:c.A2390C:p.Q797P	.	het	.	4	133422254	133422254	T	C	het	161.64	22
4	133532763	133532763	C	A	exonic	Nudc	.	nonsynonymous SNV	Nudc:NM_010948:exon8:c.G984T:p.K328N	.	het	.	4	133532763	133532763	C	A	het	102.64	10
4	133574787	133574787	G	A	exonic	Gpatch3	.	nonsynonymous SNV	Gpatch3:NM_172876:exon1:c.G28A:p.E10K	.	het	.	4	133574787	133574787	G	A	het	123.64	23
4	133574919	133574919	T	C	exonic	Gpatch3	.	nonsynonymous SNV	Gpatch3:NM_172876:exon1:c.G160C:p.E54Q	.	het	.	4	133574919	133574919	T	C	het	69.64	18
4	133575070	133575070	C	T	exonic	Gpatch3	.	nonsynonymous SNV	Gpatch3:NM_172876:exon1:c.G311T:p.C104F	.	het	.	4	133575070	133575070	C	T	het	103.64	34
4	133601258	133601258	T	A	exonic	Sfn	.	nonsynonymous SNV	Sfn:NM_018754:exon1:c.G512T:p.G171V	.	het	.	4	133601258	133601258	T	A	het	135.64	23
4	133601299	133601299	T	C	exonic	Sfn	.	nonsynonymous SNV	Sfn:NM_018754:exon1:c.C471G:p.I157M	.	het	.	4	133601299	133601299	T	C	het	151.64	30
4	133601404	133601404	T	A	exonic	Sfn	.	nonsynonymous SNV	Sfn:NM_018754:exon1:c.G366T:p.K122N	.	het	.	4	133601404	133601404	T	A	het	153.64	34
4	133601421	133601421	T	C	exonic	Sfn	.	nonsynonymous SNV	Sfn:NM_018754:exon1:c.C349G:p.R117G	.	het	.	4	133601421	133601421	T	C	het	148.64	37
4	133608670	133608670	C	T	exonic	Zdhhc18	.	nonsynonymous SNV	Zdhhc18:NM_001017968:exon8:c.G1129A:p.G377R	.	het	.	4	133608670	133608670	C	T	het	109.64	21
4	133608713	133608713	C	T	exonic	Zdhhc18	.	nonsynonymous SNV	Zdhhc18:NM_001017968:exon8:c.T1086A:p.S362R	.	het	.	4	133608713	133608713	C	T	het	43.64	24
4	133613875	133613875	A	G	exonic	Zdhhc18	.	nonsynonymous SNV	Zdhhc18:NM_001017968:exon4:c.T686C:p.F229S	.	het	.	4	133613875	133613875	A	G	het	424.64	36
4	133613892	133613892	A	G	exonic	Zdhhc18	.	nonsynonymous SNV	Zdhhc18:NM_001017968:exon4:c.A669C:p.R223S	.	het	.	4	133613892	133613892	A	G	het	427.64	35
4	133686778	133686778	G	A	exonic	Arid1a	.	nonsynonymous SNV	Arid1a:NM_001080819:exon15:c.A3731T:p.D1244V,Arid1a:NM_001363070:exon15:c.A2573T:p.D858V	.	het	.	4	133686778	133686778	G	A	het	171.64	11
4	133687230	133687230	A	G	exonic	Arid1a	.	nonsynonymous SNV	Arid1a:NM_001080819:exon14:c.A3692C:p.K1231T,Arid1a:NM_001363070:exon14:c.A2534C:p.K845T	.	het	.	4	133687230	133687230	A	G	het	31.64	14
4	133696117	133696117	T	G	exonic	Arid1a	.	nonsynonymous SNV	Arid1a:NM_001080819:exon5:c.G1963C:p.E655Q,Arid1a:NM_001363070:exon5:c.G808C:p.E270Q	.	het	.	4	133696117	133696117	T	G	het	86.64	23
4	133753466	133753466	A	G	exonic	Arid1a	.	nonsynonymous SNV	Arid1a:NM_001080819:exon1:c.A146C:p.K49T	.	het	.	4	133753466	133753466	A	G	het	73.64	14
4	133753488	133753488	C	T	exonic	Arid1a	.	nonsynonymous SNV	Arid1a:NM_001080819:exon1:c.G124A:p.A42T	.	het	.	4	133753488	133753488	C	T	het	104.64	17
4	133753586	133753586	T	C	exonic	Arid1a	.	nonsynonymous SNV	Arid1a:NM_001080819:exon1:c.C26G:p.A9G	.	het	.	4	133753586	133753586	T	C	het	127.64	11
4	133848585	133848585	A	G	exonic	Rps6ka1	.	nonsynonymous SNV	Rps6ka1:NM_001285506:exon20:c.G1974C:p.W658C,Rps6ka1:NM_001378880:exon20:c.G2040C:p.W680C,Rps6ka1:NM_001285505:exon21:c.G1989C:p.W663C,Rps6ka1:NM_009097:exon21:c.G2022C:p.W674C	.	het	.	4	133848585	133848585	A	G	het	246.64	27
4	133994184	133994184	C	T	exonic	Dhdds	.	nonsynonymous SNV	Dhdds:NM_001362959:exon4:c.T301A:p.F101I,Dhdds:NM_001362960:exon4:c.T301A:p.F101I,Dhdds:NM_001362962:exon4:c.T301A:p.F101I,Dhdds:NM_026144:exon4:c.T301A:p.F101I	.	het	.	4	133994184	133994184	C	T	het	94.64	11
4	134072908	134072908	C	T	exonic	Crybg2	.	nonsynonymous SNV	Crybg2:NM_001162970:exon2:c.C451T:p.P151S	.	het	.	4	134072908	134072908	C	T	het	323.64	21
4	134073134	134073134	T	C	exonic	Crybg2	.	nonsynonymous SNV	Crybg2:NM_001162970:exon2:c.G677C:p.R226T	.	het	.	4	134073134	134073134	T	C	het	82.64	13
4	134073911	134073911	A	G	exonic	Crybg2	.	nonsynonymous SNV	Crybg2:NM_001162970:exon2:c.A1454G:p.K485R	.	het	.	4	134073911	134073911	A	G	het	109.64	21
4	134073914	134073914	G	A	exonic	Crybg2	.	nonsynonymous SNV	Crybg2:NM_001162970:exon2:c.C1457A:p.T486N	.	het	.	4	134073914	134073914	G	A	het	106.64	22
4	134074310	134074310	A	G	exonic	Crybg2	.	nonsynonymous SNV	Crybg2:NM_001162970:exon2:c.C1853G:p.A618G	.	het	.	4	134074310	134074310	A	G	het	44.64	19
4	134074384	134074384	C	A	exonic	Crybg2	.	nonsynonymous SNV	Crybg2:NM_001162970:exon2:c.C1927A:p.H643N	.	het	.	4	134074384	134074384	C	A	het	257.64	30
4	134074609	134074609	A	G	exonic	Crybg2	.	nonsynonymous SNV	Crybg2:NM_001162970:exon2:c.C2152G:p.R718G	.	het	.	4	134074609	134074609	A	G	het	265.64	29
4	134074648	134074648	C	T	exonic	Crybg2	.	nonsynonymous SNV	Crybg2:NM_001162970:exon2:c.G2191T:p.V731F	.	het	.	4	134074648	134074648	C	T	het	230.64	28
4	134074679	134074679	T	C	exonic	Crybg2	.	nonsynonymous SNV	Crybg2:NM_001162970:exon2:c.A2222C:p.K741T	.	het	.	4	134074679	134074679	T	C	het	153.64	28
4	134074715	134074715	G	A	exonic	Crybg2	.	nonsynonymous SNV	Crybg2:NM_001162970:exon2:c.G2258A:p.S753N	.	het	.	4	134074715	134074715	G	A	het	80.64	28
4	134075342	134075342	T	C	exonic	Crybg2	.	nonsynonymous SNV	Crybg2:NM_001162970:exon3:c.A2510C:p.N837T	.	het	.	4	134075342	134075342	T	C	het	25.64	16
4	134075460	134075460	C	T	exonic	Crybg2	.	nonsynonymous SNV	Crybg2:NM_001162970:exon4:c.C2546T:p.P849L	.	het	.	4	134075460	134075460	C	T	het	155.64	16
4	134075541	134075541	T	C	exonic	Crybg2	.	nonsynonymous SNV	Crybg2:NM_001162970:exon4:c.T2627C:p.V876A	.	het	.	4	134075541	134075541	T	C	het	412.64	25
4	134078950	134078950	C	G	exonic	Crybg2	.	nonsynonymous SNV	Crybg2:NM_001162970:exon6:c.T2882G:p.V961G	.	het	.	4	134078950	134078950	C	G	het	159.64	14
4	134082580	134082580	C	T	exonic	Crybg2	.	nonsynonymous SNV	Crybg2:NM_001162970:exon14:c.G3642T:p.Q1214H	.	het	.	4	134082580	134082580	C	T	het	82.64	23
4	134087526	134087526	C	G	exonic	Crybg2	.	nonsynonymous SNV	Crybg2:NM_001162970:exon15:c.C3790G:p.H1264D	.	het	.	4	134087526	134087526	C	G	het	215.64	19
4	134087553	134087553	A	G	exonic	Crybg2	.	nonsynonymous SNV	Crybg2:NM_001162970:exon15:c.A3817G:p.T1273A	.	het	.	4	134087553	134087553	A	G	het	250.64	19
4	134087598	134087598	A	G	exonic	Crybg2	.	nonsynonymous SNV	Crybg2:NM_001162970:exon15:c.C3862G:p.L1288V	.	het	.	4	134087598	134087598	A	G	het	200.64	19
4	134093807	134093807	G	A	exonic	Cd52	.	nonsynonymous SNV	Cd52:NM_013706:exon2:c.G145T:p.A49S	.	het	.	4	134093807	134093807	G	A	het	136.64	12
4	134093840	134093840	T	A	exonic	Cd52	.	nonsynonymous SNV	Cd52:NM_013706:exon2:c.A112T:p.T38S	.	het	.	4	134093840	134093840	T	A	het	139.64	11
4	134093887	134093887	G	A	exonic	Cd52	.	nonsynonymous SNV	Cd52:NM_013706:exon2:c.C65T:p.S22F	.	het	.	4	134093887	134093887	G	A	het	67.64	20
4	134123551	134123551	G	A	exonic	Ubxn11	.	nonsynonymous SNV	Ubxn11:NM_026257:exon9:c.G713A:p.G238D	.	het	.	4	134123551	134123551	G	A	het	304.64	16
4	134123590	134123590	A	G	exonic	Ubxn11	.	nonsynonymous SNV	Ubxn11:NM_026257:exon9:c.A752G:p.D251G	.	het	.	4	134123590	134123590	A	G	het	165.64	13
4	134126271	134126271	T	G	exonic	Ubxn11	.	nonsynonymous SNV	Ubxn11:NM_026257:exon13:c.A1133G:p.E378G	.	het	.	4	134126271	134126271	T	G	het	88.64	13
4	134138843	134138843	G	A	exonic	Cep85	.	nonsynonymous SNV	Cep85:NM_144527:exon10:c.C1732T:p.L578F	.	het	.	4	134138843	134138843	G	A	het	37.64	12
4	134138895	134138895	T	C	exonic	Cep85	.	nonsynonymous SNV	Cep85:NM_144527:exon10:c.T1680G:p.N560K	.	het	.	4	134138895	134138895	T	C	het	70.64	19
4	134138911	134138911	0	C	exonic	Cep85	.	nonsynonymous SNV	Cep85:NM_144527:exon10:c.C1664G:p.S555C	.	het	.	4	134138911	134138911	-	C	het	102.60	20
4	134148031	134148031	T	C	exonic	Cep85	.	nonsynonymous SNV	Cep85:NM_144527:exon9:c.A1625G:p.D542G	.	het	.	4	134148031	134148031	T	C	het	235.64	21
4	134152288	134152288	A	G	exonic	Cep85	.	nonsynonymous SNV	Cep85:NM_144527:exon7:c.A1154C:p.E385A	.	het	.	4	134152288	134152288	A	G	het	26.64	17
4	134153838	134153838	T	C	exonic	Cep85	.	nonsynonymous SNV	Cep85:NM_144527:exon6:c.T1123G:p.F375V	.	het	.	4	134153838	134153838	T	C	het	121.64	13
4	134202236	134202236	C	T	exonic	Zpld2	.	nonsynonymous SNV	Zpld2:NM_001080712:exon1:c.C757A:p.P253T	.	het	.	4	134202236	134202236	C	T	het	173.64	21
4	134202404	134202404	G	C	exonic	Zpld2	.	nonsynonymous SNV	Zpld2:NM_001080712:exon1:c.C589G:p.L197V	.	het	.	4	134202404	134202404	G	C	het	142.64	18
4	134202473	134202473	T	C	exonic	Zpld2	.	nonsynonymous SNV	Zpld2:NM_001080712:exon1:c.T520G:p.S174A	.	het	.	4	134202473	134202473	T	C	het	244.64	21
4	134202589	134202589	A	G	exonic	Zpld2	.	nonsynonymous SNV	Zpld2:NM_001080712:exon1:c.T404C:p.L135P	.	het	.	4	134202589	134202589	A	G	het	85.64	22
4	134235128	134235128	T	C	exonic	Cnksr1	.	nonsynonymous SNV	Cnksr1:NM_001081047:exon4:c.T458G:p.L153R	.	het	.	4	134235128	134235128	T	C	het	114.64	25
4	134235893	134235893	C	T	exonic	Cnksr1	.	nonsynonymous SNV	Cnksr1:NM_001081047:exon3:c.G370A:p.A124T	.	het	.	4	134235893	134235893	C	T	het	373.64	23
4	134235996	134235996	A	G	exonic	Cnksr1	.	nonsynonymous SNV	Cnksr1:NM_001081047:exon3:c.G267C:p.R89S	.	het	.	4	134235996	134235996	A	G	het	194.64	21
4	134236275	134236275	T	G	exonic	Cnksr1	.	nonsynonymous SNV	Cnksr1:NM_001081047:exon2:c.A95C:p.Q32P	.	het	.	4	134236275	134236275	T	G	het	29.64	15
4	134244812	134244812	T	C	exonic	Zfp593	.	nonsynonymous SNV	Zfp593:NM_024215:exon3:c.C382G:p.P128A	.	het	.	4	134244812	134244812	T	C	het	229.64	26
4	134244882	134244882	T	G	exonic	Zfp593	.	nonsynonymous SNV	Zfp593:NM_024215:exon3:c.G312C:p.R104S	.	het	.	4	134244882	134244882	T	G	het	42.64	24
4	134245409	134245409	A	C	exonic	Zfp593	.	nonsynonymous SNV	Zfp593:NM_024215:exon1:c.A95G:p.H32R	.	het	.	4	134245409	134245409	A	C	het	187.64	10
4	134245410	134245410	G	A	exonic	Zfp593	.	nonsynonymous SNV	Zfp593:NM_024215:exon1:c.C94T:p.H32Y	.	het	.	4	134245410	134245410	G	A	het	187.64	10
4	134278621	134278621	T	C	exonic	Pdik1l	.	nonsynonymous SNV	Pdik1l:NM_001163794:exon3:c.A781G:p.T261A,Pdik1l:NM_146156:exon3:c.A781G:p.T261A	.	het	.	4	134278621	134278621	T	C	het	396.64	43
4	134278878	134278878	A	G	exonic	Pdik1l	.	nonsynonymous SNV	Pdik1l:NM_001163794:exon3:c.G524C:p.S175T,Pdik1l:NM_146156:exon3:c.G524C:p.S175T	.	het	.	4	134278878	134278878	A	G	het	182.64	21
4	134278919	134278919	G	C	exonic	Pdik1l	.	nonsynonymous SNV	Pdik1l:NM_001163794:exon3:c.C483G:p.I161M,Pdik1l:NM_146156:exon3:c.C483G:p.I161M	.	het	.	4	134278919	134278919	G	C	het	166.64	17
4	134278938	134278938	T	C	exonic	Pdik1l	.	nonsynonymous SNV	Pdik1l:NM_001163794:exon3:c.T464G:p.L155W,Pdik1l:NM_146156:exon3:c.T464G:p.L155W	.	het	.	4	134278938	134278938	T	C	het	67.64	13
4	134279065	134279065	C	T	exonic	Pdik1l	.	nonsynonymous SNV	Pdik1l:NM_001163794:exon3:c.T337A:p.Y113N,Pdik1l:NM_146156:exon3:c.T337A:p.Y113N	.	het	.	4	134279065	134279065	C	T	het	243.64	13
4	134284299	134284299	A	G	exonic	Pdik1l	.	nonsynonymous SNV	Pdik1l:NM_001163794:exon2:c.G232C:p.D78H,Pdik1l:NM_146156:exon2:c.G232C:p.D78H	.	het	.	4	134284299	134284299	A	G	het	22.64	15
4	135344601	135344601	G	C	exonic	Srrm1	.	nonsynonymous SNV	Srrm1:NM_001130477:exon4:c.C303G:p.F101L,Srrm1:NM_001369067:exon4:c.C303G:p.F101L,Srrm1:NM_001369068:exon4:c.C303G:p.F101L,Srrm1:NM_001369069:exon4:c.C303G:p.F101L,Srrm1:NM_001369070:exon4:c.C303G:p.F101L,Srrm1:NM_001369071:exon4:c.C303G:p.F101L,Srrm1:NM_001369072:exon4:c.C303G:p.F101L,Srrm1:NM_001369073:exon4:c.C303G:p.F101L,Srrm1:NM_016799:exon4:c.C303G:p.F101L,Srrm1:NM_001369074:exon5:c.C54G:p…	.	het	.	4	135344601	135344601	G	C	het	151.64	18
4	135344613	135344613	G	C	exonic	Srrm1	.	nonsynonymous SNV	Srrm1:NM_001130477:exon4:c.T291G:p.N97K,Srrm1:NM_001369067:exon4:c.T291G:p.N97K,Srrm1:NM_001369068:exon4:c.T291G:p.N97K,Srrm1:NM_001369069:exon4:c.T291G:p.N97K,Srrm1:NM_001369070:exon4:c.T291G:p.N97K,Srrm1:NM_001369071:exon4:c.T291G:p.N97K,Srrm1:NM_001369072:exon4:c.T291G:p.N97K,Srrm1:NM_001369073:exon4:c.T291G:p.N97K,Srrm1:NM_016799:exon4:c.T291G:p.N97K,Srrm1:NM_001369074:exon5:c.T42G:p.N14K	.	het	.	4	135344613	135344613	G	C	het	118.64	18
4	135788294	135788294	T	G	exonic	Myom3	.	nonsynonymous SNV	Myom3:NM_001085509:exon19:c.A2293G:p.N765D	.	het	.	4	135788294	135788294	T	G	het	49.64	11
4	135861872	135861872	C	T	exonic	Srsf10	.	nonsynonymous SNV	Srsf10:NM_001080387:exon3:c.G269T:p.R90L,Srsf10:NM_001284195:exon3:c.G269T:p.R90L,Srsf10:NM_001284196:exon3:c.G269T:p.R90L,Srsf10:NM_010178:exon3:c.G269T:p.R90L	.	het	.	4	135861872	135861872	C	T	het	229.64	19
4	135863096	135863096	T	C	exonic	Srsf10	.	nonsynonymous SNV	Srsf10:NM_001080387:exon4:c.G331C:p.D111H,Srsf10:NM_001284195:exon4:c.G331C:p.D111H,Srsf10:NM_001284196:exon4:c.G331C:p.D111H,Srsf10:NM_010178:exon4:c.G331C:p.D111H	.	het	.	4	135863096	135863096	T	C	het	220.64	19
4	135917461	135917461	A	G	exonic	Cnr2	.	nonsynonymous SNV	Cnr2:NM_001305278:exon2:c.C849G:p.F283L,Cnr2:NM_009924:exon2:c.C849G:p.F283L	.	het	.	4	135917461	135917461	A	G	het	75.64	19
4	135917609	135917609	G	A	exonic	Cnr2	.	nonsynonymous SNV	Cnr2:NM_001305278:exon2:c.C997A:p.P333T,Cnr2:NM_009924:exon2:c.C997A:p.P333T	.	het	.	4	135917609	135917609	G	A	het	64.64	15
4	135946515	135946515	T	C	exonic	Hmgcl	.	nonsynonymous SNV	Hmgcl:NM_008254:exon1:c.T35C:p.L12P	.	het	.	4	135946515	135946515	T	C	het	173.64	21
4	135955658	135955658	G	A	exonic	Hmgcl	.	nonsynonymous SNV	Hmgcl:NM_001357529:exon5:c.C345A:p.N115K,Hmgcl:NM_008254:exon5:c.C420A:p.N140K,Hmgcl:NM_001357530:exon6:c.C213A:p.N71K	.	het	.	4	135955658	135955658	G	A	het	148.64	24
4	135955678	135955678	T	C	exonic	Hmgcl	.	nonsynonymous SNV	Hmgcl:NM_001357529:exon5:c.T365C:p.F122S,Hmgcl:NM_008254:exon5:c.T440C:p.F147S,Hmgcl:NM_001357530:exon6:c.T233C:p.F78S	.	het	.	4	135955678	135955678	T	C	het	176.64	30
4	135960047	135960047	G	A	exonic	Hmgcl	.	nonsynonymous SNV	Hmgcl:NM_001357529:exon7:c.C557A:p.P186Q,Hmgcl:NM_008254:exon7:c.C632A:p.P211Q,Hmgcl:NM_001357530:exon8:c.C425A:p.P142Q	.	het	.	4	135960047	135960047	G	A	het	49.64	11
4	135962121	135962121	G	A	exonic	Hmgcl	.	nonsynonymous SNV	Hmgcl:NM_001357529:exon9:c.C814A:p.Q272K,Hmgcl:NM_008254:exon9:c.C889A:p.Q297K,Hmgcl:NM_001357530:exon10:c.C682A:p.Q228K	.	het	.	4	135962121	135962121	G	A	het	35.64	13
4	135970502	135970502	C	T	exonic	Lypla2	.	nonsynonymous SNV	Lypla2:NM_011942:exon4:c.C128A:p.A43D	.	het	.	4	135970502	135970502	C	T	het	195.64	26
4	136010510	136010510	C	T	exonic	Eloa	.	nonsynonymous SNV	Eloa:NM_013736:exon4:c.G1138A:p.A380T	.	het	.	4	136010510	136010510	C	T	het	156.64	12
4	136172788	136172788	C	T	exonic	E2f2	.	nonsynonymous SNV	E2f2:NM_177733:exon1:c.G8T:p.R3L	.	het	.	4	136172788	136172788	C	T	het	166.64	10
4	136178493	136178493	0	T	exonic	E2f2	.	nonsynonymous SNV	E2f2:NM_177733:exon2:c.A316T:p.T106S	.	het	.	4	136178493	136178493	-	T	het	226.60	12
4	136314198	136314198	C	T	exonic	Hnrnpr	.	nonsynonymous SNV	Hnrnpr:NM_001277121:exon2:c.A100T:p.I34L,Hnrnpr:NM_001355182:exon2:c.A100T:p.I34L,Hnrnpr:NM_028871:exon2:c.A100T:p.I34L	.	het	.	4	136314198	136314198	C	T	het	31.64	17
4	136443346	136443346	C	T	exonic	Htr1d	.	nonsynonymous SNV	Htr1d:NM_001285484:exon2:c.A885T:p.K295N,Htr1d:NM_008309:exon2:c.A885T:p.K295N,Htr1d:NM_001285482:exon3:c.A885T:p.K295N,Htr1d:NM_001285483:exon3:c.A885T:p.K295N	.	het	.	4	136443346	136443346	C	T	het	61.64	13
4	136443539	136443539	G	A	exonic	Htr1d	.	nonsynonymous SNV	Htr1d:NM_001285484:exon2:c.T1078A:p.F360I,Htr1d:NM_008309:exon2:c.T1078A:p.F360I,Htr1d:NM_001285482:exon3:c.T1078A:p.F360I,Htr1d:NM_001285483:exon3:c.T1078A:p.F360I	.	het	.	4	136443539	136443539	G	A	het	91.64	12
4	136443563	136443563	T	C	exonic	Htr1d	.	nonsynonymous SNV	Htr1d:NM_001285484:exon2:c.G1102C:p.V368L,Htr1d:NM_008309:exon2:c.G1102C:p.V368L,Htr1d:NM_001285482:exon3:c.G1102C:p.V368L,Htr1d:NM_001285483:exon3:c.G1102C:p.V368L	.	het	.	4	136443563	136443563	T	C	het	97.64	10
4	136540849	136540849	A	G	exonic	Luzp1	.	nonsynonymous SNV	Luzp1:NM_024452:exon4:c.A382G:p.S128G	.	het	.	4	136540849	136540849	A	G	het	121.64	17
4	136540857	136540857	A	G	exonic	Luzp1	.	nonsynonymous SNV	Luzp1:NM_024452:exon4:c.T390G:p.S130R	.	het	.	4	136540857	136540857	A	G	het	121.64	17
4	136541094	136541094	T	C	exonic	Luzp1	.	nonsynonymous SNV	Luzp1:NM_024452:exon4:c.A627C:p.K209N	.	het	.	4	136541094	136541094	T	C	het	174.64	22
4	136541209	136541209	G	A	exonic	Luzp1	.	nonsynonymous SNV	Luzp1:NM_024452:exon4:c.T742A:p.S248T	.	het	.	4	136541209	136541209	G	A	het	157.64	20
4	136541212	136541212	A	G	exonic	Luzp1	.	nonsynonymous SNV	Luzp1:NM_024452:exon4:c.T745G:p.S249A	.	het	.	4	136541212	136541212	A	G	het	157.64	20
4	136541232	136541232	G	T	exonic	Luzp1	.	nonsynonymous SNV	Luzp1:NM_024452:exon4:c.G765T:p.E255D	.	het	.	4	136541232	136541232	G	T	het	154.64	21
4	136541656	136541656	G	A	exonic	Luzp1	.	nonsynonymous SNV	Luzp1:NM_024452:exon4:c.C1189A:p.Q397K	.	het	.	4	136541656	136541656	G	A	het	157.64	13
4	136541807	136541807	A	G	exonic	Luzp1	.	nonsynonymous SNV	Luzp1:NM_024452:exon4:c.A1340G:p.Q447R	.	het	.	4	136541807	136541807	A	G	het	72.64	17
4	136542932	136542932	G	A	exonic	Luzp1	.	nonsynonymous SNV	Luzp1:NM_024452:exon4:c.C2465A:p.T822N	.	het	.	4	136542932	136542932	G	A	het	259.64	20
4	136543210	136543210	A	G	exonic	Luzp1	.	nonsynonymous SNV	Luzp1:NM_024452:exon4:c.A2743G:p.T915A	.	het	.	4	136543210	136543210	A	G	het	165.64	13
4	136543307	136543307	G	A	exonic	Luzp1	.	nonsynonymous SNV	Luzp1:NM_024452:exon4:c.C2840A:p.T947K	.	het	.	4	136543307	136543307	G	A	het	205.64	19
4	136543385	136543385	T	C	exonic	Luzp1	.	nonsynonymous SNV	Luzp1:NM_024452:exon4:c.G2918C:p.G973A	.	het	.	4	136543385	136543385	T	C	het	123.64	19
4	136545314	136545314	A	G	exonic	Luzp1	.	nonsynonymous SNV	Luzp1:NM_024452:exon5:c.A3128G:p.K1043R	.	het	.	4	136545314	136545314	A	G	het	269.64	30
4	136545377	136545377	C	T	exonic	Luzp1	.	nonsynonymous SNV	Luzp1:NM_024452:exon5:c.A3191T:p.Y1064F	.	het	.	4	136545377	136545377	C	T	het	220.64	22
4	136557673	136557673	A	C	exonic	Kdm1a	.	nonsynonymous SNV	Kdm1a:NM_133872:exon13:c.T1634G:p.L545R,Kdm1a:NM_001347221:exon14:c.T1694G:p.L565R,Kdm1a:NM_001356567:exon14:c.T1646G:p.L549R	.	het	.	4	136557673	136557673	A	C	het	210.64	14
4	136572248	136572248	C	T	exonic	Kdm1a	.	nonsynonymous SNV	Kdm1a:NM_001356567:exon6:c.T903A:p.F301L,Kdm1a:NM_133872:exon6:c.T903A:p.F301L,Kdm1a:NM_001347221:exon7:c.T963A:p.F321L	.	het	.	4	136572248	136572248	C	T	het	166.64	10
4	136602413	136602413	G	C	exonic	Kdm1a	.	nonsynonymous SNV	Kdm1a:NM_001347221:exon1:c.A173G:p.E58G,Kdm1a:NM_001356567:exon1:c.A173G:p.E58G,Kdm1a:NM_133872:exon1:c.A173G:p.E58G	.	het	.	4	136602413	136602413	G	C	het	43.64	13
4	136602452	136602452	A	G	exonic	Kdm1a	.	nonsynonymous SNV	Kdm1a:NM_001347221:exon1:c.T134C:p.L45P,Kdm1a:NM_001356567:exon1:c.T134C:p.L45P,Kdm1a:NM_133872:exon1:c.T134C:p.L45P	.	het	.	4	136602452	136602452	A	G	het	49.64	11
4	136602461	136602461	G	A	exonic	Kdm1a	.	nonsynonymous SNV	Kdm1a:NM_001347221:exon1:c.C125T:p.P42L,Kdm1a:NM_001356567:exon1:c.C125T:p.P42L,Kdm1a:NM_133872:exon1:c.C125T:p.P42L	.	het	.	4	136602461	136602461	G	A	het	49.64	11
4	136602507	136602507	G	A	exonic	Kdm1a	.	nonsynonymous SNV	Kdm1a:NM_001347221:exon1:c.G79T:p.G27W,Kdm1a:NM_001356567:exon1:c.G79T:p.G27W,Kdm1a:NM_133872:exon1:c.G79T:p.G27W	.	het	.	4	136602507	136602507	G	A	het	115.64	15
4	136633014	136633014	G	A	exonic	Lactbl1	.	nonsynonymous SNV	Lactbl1:NM_001243262:exon6:c.T503A:p.L168Q	.	het	.	4	136633014	136633014	G	A	het	149.64	17
4	136633077	136633077	A	G	exonic	Lactbl1	.	nonsynonymous SNV	Lactbl1:NM_001243262:exon6:c.C566G:p.A189G	.	het	.	4	136633077	136633077	A	G	het	162.64	17
4	136633085	136633085	C	G	exonic	Lactbl1	.	nonsynonymous SNV	Lactbl1:NM_001243262:exon6:c.C574G:p.P192A	.	het	.	4	136633085	136633085	C	G	het	162.64	17
4	136657448	136657448	A	C	exonic	Ephb2	.	nonsynonymous SNV	Ephb2:NM_001290753:exon14:c.T2654G:p.I885S,Ephb2:NM_010142:exon14:c.T2651G:p.I884S	.	het	.	4	136657448	136657448	A	C	het	185.64	31
4	136657588	136657588	T	C	exonic	Ephb2	.	nonsynonymous SNV	Ephb2:NM_001290753:exon14:c.C2514G:p.N838K,Ephb2:NM_010142:exon14:c.C2511G:p.N837K	.	het	.	4	136657588	136657588	T	C	het	38.64	24
4	136660698	136660698	C	T	exonic	Ephb2	.	nonsynonymous SNV	Ephb2:NM_001290753:exon11:c.T2093A:p.I698N,Ephb2:NM_010142:exon11:c.T2090A:p.I697N	.	het	.	4	136660698	136660698	C	T	het	142.64	33
4	136660731	136660731	A	G	exonic	Ephb2	.	nonsynonymous SNV	Ephb2:NM_001290753:exon11:c.A2060C:p.E687A,Ephb2:NM_010142:exon11:c.A2057C:p.E686A	.	het	.	4	136660731	136660731	A	G	het	118.64	33
4	136660740	136660740	G	C	exonic	Ephb2	.	nonsynonymous SNV	Ephb2:NM_001290753:exon11:c.T2051G:p.I684S,Ephb2:NM_010142:exon11:c.T2048G:p.I683S	.	het	.	4	136660740	136660740	G	C	het	118.64	33
4	136660806	136660806	G	A	exonic	Ephb2	.	nonsynonymous SNV	Ephb2:NM_001290753:exon11:c.A1985T:p.E662V,Ephb2:NM_010142:exon11:c.A1982T:p.E661V	.	het	.	4	136660806	136660806	G	A	het	250.64	31
4	136660815	136660815	T	G	exonic	Ephb2	.	nonsynonymous SNV	Ephb2:NM_001290753:exon11:c.G1976C:p.G659A,Ephb2:NM_010142:exon11:c.G1973C:p.G658A	.	het	.	4	136660815	136660815	T	G	het	217.64	30
4	136661414	136661414	C	T	exonic	Ephb2	.	nonsynonymous SNV	Ephb2:NM_001290753:exon10:c.T1871A:p.I624N,Ephb2:NM_010142:exon10:c.T1868A:p.I623N	.	het	.	4	136661414	136661414	C	T	het	170.64	32
4	136675368	136675368	C	A	exonic	Ephb2	.	nonsynonymous SNV	Ephb2:NM_001290753:exon7:c.G1594T:p.A532S,Ephb2:NM_010142:exon7:c.G1591T:p.A531S	.	het	.	4	136675368	136675368	C	A	het	46.64	12
4	136675445	136675445	T	C	exonic	Ephb2	.	nonsynonymous SNV	Ephb2:NM_001290753:exon7:c.T1517G:p.V506G,Ephb2:NM_010142:exon7:c.T1514G:p.V505G	.	het	.	4	136675445	136675445	T	C	het	84.64	10
4	136675478	136675478	C	T	exonic	Ephb2	.	nonsynonymous SNV	Ephb2:NM_001290753:exon7:c.C1484A:p.T495N,Ephb2:NM_010142:exon7:c.C1481A:p.T494N	.	het	.	4	136675478	136675478	C	T	het	114.64	11
4	136694025	136694025	T	C	exonic	Ephb2	.	nonsynonymous SNV	Ephb2:NM_001290753:exon5:c.C1013G:p.T338R,Ephb2:NM_010142:exon5:c.C1013G:p.T338R	.	het	.	4	136694025	136694025	T	C	het	229.64	26
4	136694027	136694027	G	A	exonic	Ephb2	.	nonsynonymous SNV	Ephb2:NM_001290753:exon5:c.G1011T:p.E337D,Ephb2:NM_010142:exon5:c.G1011T:p.E337D	.	het	.	4	136694027	136694027	G	A	het	229.64	26
4	136880298	136880298	T	A	exonic	C1qb	.	nonsynonymous SNV	C1qb:NM_009777:exon3:c.G753T:p.M251I	.	het	.	4	136880298	136880298	T	A	het	116.64	13
4	136890050	136890050	0	T	exonic	C1qc	.	nonsynonymous SNV	C1qc:NM_007574:exon3:c.C734A:p.P245H	.	het	.	4	136890050	136890050	-	T	het	118.60	12
4	136890112	136890112	A	T	exonic	C1qc	.	nonsynonymous SNV	C1qc:NM_007574:exon3:c.C672A:p.D224E	.	het	.	4	136890112	136890112	A	T	het	136.64	12
4	136890136	136890136	T	C	exonic	C1qc	.	nonsynonymous SNV	C1qc:NM_007574:exon3:c.T648G:p.D216E	.	het	.	4	136890136	136890136	T	C	het	97.64	10
4	136890138	136890138	C	T	exonic	C1qc	.	nonsynonymous SNV	C1qc:NM_007574:exon3:c.G646A:p.D216N	.	het	.	4	136890138	136890138	C	T	het	97.64	10
4	136890141	136890141	G	T	exonic	C1qc	.	nonsynonymous SNV	C1qc:NM_007574:exon3:c.G643A:p.G215S	.	het	.	4	136890141	136890141	G	T	het	97.64	10
4	136892415	136892415	A	G	exonic	C1qc	.	nonsynonymous SNV	C1qc:NM_007574:exon2:c.G148C:p.G50R	.	het	.	4	136892415	136892415	A	G	het	145.64	24
4	136896533	136896533	A	G	exonic	C1qa	.	nonsynonymous SNV	C1qa:NM_007572:exon3:c.T359C:p.I120T	.	het	.	4	136896533	136896533	A	G	het	62.64	15
4	136931124	136931124	A	C	exonic	Epha8	.	nonsynonymous SNV	Epha8:NM_007939:exon17:c.A2939G:p.Q980R	.	het	.	4	136931124	136931124	A	C	het	199.64	14
4	136931136	136931136	T	C	exonic	Epha8	.	nonsynonymous SNV	Epha8:NM_007939:exon17:c.T2927G:p.L976R	.	het	.	4	136931136	136931136	T	C	het	278.64	15
4	136931349	136931349	G	T	exonic	Epha8	.	nonsynonymous SNV	Epha8:NM_007939:exon16:c.C2847A:p.H949Q	.	het	.	4	136931349	136931349	G	T	het	141.64	18
4	136931426	136931426	A	G	exonic	Epha8	.	nonsynonymous SNV	Epha8:NM_007939:exon16:c.G2770C:p.A924P	.	het	.	4	136931426	136931426	A	G	het	119.64	15
4	136932447	136932447	C	T	exonic	Epha8	.	nonsynonymous SNV	Epha8:NM_007939:exon13:c.G2217A:p.M739I	.	het	.	4	136932447	136932447	C	T	het	122.64	10
4	136932460	136932460	A	C	exonic	Epha8	.	nonsynonymous SNV	Epha8:NM_007939:exon13:c.A2204G:p.Q735R	.	het	.	4	136932460	136932460	A	C	het	131.64	12
4	136945822	136945822	T	C	exonic	Epha8	.	nonsynonymous SNV	Epha8:NM_007939:exon3:c.T650G:p.V217G	.	het	.	4	136945822	136945822	T	C	het	62.64	15
4	136945845	136945845	C	T	exonic	Epha8	.	nonsynonymous SNV	Epha8:NM_007939:exon3:c.C627A:p.N209K	.	het	.	4	136945845	136945845	C	T	het	43.64	13
4	136986524	136986524	T	C	exonic	Zbtb40	.	nonsynonymous SNV	Zbtb40:NM_198248:exon17:c.C3314G:p.T1105R	.	het	.	4	136986524	136986524	T	C	het	197.64	14
4	136991522	136991522	T	C	exonic	Zbtb40	.	nonsynonymous SNV	Zbtb40:NM_198248:exon14:c.T2863G:p.S955A	.	het	.	4	136991522	136991522	T	C	het	118.64	14
4	136991627	136991627	T	C	exonic	Zbtb40	.	nonsynonymous SNV	Zbtb40:NM_198248:exon14:c.T2758G:p.F920V	.	het	.	4	136991627	136991627	T	C	het	65.64	30
4	136998554	136998554	C	A	exonic	Zbtb40	.	nonsynonymous SNV	Zbtb40:NM_198248:exon9:c.A1693T:p.N565Y	.	het	.	4	136998554	136998554	C	A	het	110.64	12
4	137001300	137001300	A	G	exonic	Zbtb40	.	nonsynonymous SNV	Zbtb40:NM_198248:exon6:c.A1231C:p.S411R	.	het	.	4	137001300	137001300	A	G	het	60.64	17
4	137017395	137017395	C	A	exonic	Zbtb40	.	nonsynonymous SNV	Zbtb40:NM_198248:exon3:c.A713T:p.Q238L	.	het	.	4	137017395	137017395	C	A	het	232.64	10
4	137295773	137295773	T	G	exonic	Wnt4	.	nonsynonymous SNV	Wnt4:NM_009523:exon4:c.A559G:p.N187D	.	het	.	4	137295773	137295773	T	G	het	54.64	23
4	137296402	137296402	T	C	exonic	Wnt4	.	nonsynonymous SNV	Wnt4:NM_009523:exon5:c.T679C:p.F227L	.	het	.	4	137296402	137296402	T	C	het	138.64	34
4	137296756	137296756	G	C	exonic	Wnt4	.	nonsynonymous SNV	Wnt4:NM_009523:exon5:c.G1033C:p.V345L	.	het	.	4	137296756	137296756	G	C	het	70.64	27
4	137402627	137402627	G	A	exonic	Cela3a	.	nonsynonymous SNV	Cela3a:NM_001126318:exon7:c.G682T:p.G228C	.	het	.	4	137402627	137402627	G	A	het	40.64	25
4	137403858	137403858	C	T	exonic	Cela3a	.	nonsynonymous SNV	Cela3a:NM_001126318:exon6:c.T568A:p.W190R	.	het	.	4	137403858	137403858	C	T	het	81.64	14
4	137403924	137403924	A	G	exonic	Cela3a	.	nonsynonymous SNV	Cela3a:NM_001126318:exon6:c.G502C:p.G168R	.	het	.	4	137403924	137403924	A	G	het	74.64	14
4	137454863	137454863	C	T	exonic	1700013G24Rik	.	nonsynonymous SNV	1700013G24Rik:NM_027063:exon2:c.A328T:p.S110C	.	het	.	4	137454863	137454863	C	T	het	30.64	31
4	137508318	137508318	T	C	exonic	Hspg2	.	nonsynonymous SNV	Hspg2:NM_008305:exon6:c.G428C:p.W143S	.	het	.	4	137508318	137508318	T	C	het	142.64	25
4	137508332	137508332	T	G	exonic	Hspg2	.	nonsynonymous SNV	Hspg2:NM_008305:exon6:c.C442G:p.L148V	.	het	.	4	137508332	137508332	T	G	het	142.64	25
4	137510598	137510598	T	C	exonic	Hspg2	.	nonsynonymous SNV	Hspg2:NM_008305:exon7:c.G631C:p.E211Q	.	het	.	4	137510598	137510598	T	C	het	82.64	15
4	137510604	137510604	G	A	exonic	Hspg2	.	nonsynonymous SNV	Hspg2:NM_008305:exon7:c.G637A:p.V213M	.	het	.	4	137510604	137510604	G	A	het	82.64	15
4	137511940	137511940	T	C	exonic	Hspg2	.	nonsynonymous SNV	Hspg2:NM_008305:exon10:c.G1177C:p.D393H	.	het	.	4	137511940	137511940	T	C	het	48.64	25
4	137512131	137512131	C	T	exonic	Hspg2	.	nonsynonymous SNV	Hspg2:NM_008305:exon11:c.G1239T:p.Q413H	.	het	.	4	137512131	137512131	C	T	het	85.64	22
4	137512169	137512169	G	A	exonic	Hspg2	.	nonsynonymous SNV	Hspg2:NM_008305:exon11:c.T1277A:p.F426Y	.	het	.	4	137512169	137512169	G	A	het	92.64	21
4	137512223	137512223	0	C	exonic	Hspg2	.	nonsynonymous SNV	Hspg2:NM_008305:exon11:c.G1331C:p.W444S	.	het	.	4	137512223	137512223	-	C	het	106.60	22
4	137512229	137512229	T	G	exonic	Hspg2	.	nonsynonymous SNV	Hspg2:NM_008305:exon11:c.A1337G:p.H446R	.	het	.	4	137512229	137512229	T	G	het	106.64	22
4	137512660	137512660	C	G	exonic	Hspg2	.	nonsynonymous SNV	Hspg2:NM_008305:exon13:c.A1538G:p.E513G	.	het	.	4	137512660	137512660	C	G	het	20.64	21
4	137512762	137512762	T	G	exonic	Hspg2	.	nonsynonymous SNV	Hspg2:NM_008305:exon13:c.C1640G:p.P547R	.	het	.	4	137512762	137512762	T	G	het	38.64	12
4	137517383	137517383	T	C	exonic	Hspg2	.	nonsynonymous SNV	Hspg2:NM_008305:exon20:c.A2577C:p.E859D	.	het	.	4	137517383	137517383	T	C	het	37.64	12
4	138286438	138286438	A	C	exonic	Kif17	.	nonsynonymous SNV	Kif17:NM_010623:exon7:c.G1240C:p.E414Q	.	het	.	4	138286438	138286438	A	C	het	37.64	12
4	138291474	138291474	G	A	exonic	Kif17	.	nonsynonymous SNV	Kif17:NM_001190978:exon8:c.G1423A:p.E475K,Kif17:NM_010623:exon10:c.G2134A:p.E712K	.	het	.	4	138291474	138291474	G	A	het	79.64	16
4	138291480	138291480	T	C	exonic	Kif17	.	nonsynonymous SNV	Kif17:NM_001190978:exon8:c.G1429C:p.A477P,Kif17:NM_010623:exon10:c.G2140C:p.A714P	.	het	.	4	138291480	138291480	T	C	het	76.64	17
4	138437673	138437673	G	A	exonic	Mul1	.	nonsynonymous SNV	Mul1:NM_026689:exon2:c.T166A:p.S56T	.	het	.	4	138437673	138437673	G	A	het	34.64	16
4	138438966	138438966	A	C	exonic	Mul1	.	nonsynonymous SNV	Mul1:NM_026689:exon4:c.G345C:p.K115N	.	het	.	4	138438966	138438966	A	C	het	29.64	15
4	138439298	138439298	A	G	exonic	Mul1	.	nonsynonymous SNV	Mul1:NM_026689:exon4:c.T677G:p.F226C	.	het	.	4	138439298	138439298	A	G	het	40.64	14
4	138439487	138439487	T	C	exonic	Mul1	.	nonsynonymous SNV	Mul1:NM_026689:exon4:c.A866C:p.Q289P	.	het	.	4	138439487	138439487	T	C	het	36.64	11
4	138439579	138439579	T	C	exonic	Mul1	.	nonsynonymous SNV	Mul1:NM_026689:exon4:c.G958C:p.V320L	.	het	.	4	138439579	138439579	T	C	het	67.64	20
4	138569234	138569234	A	G	exonic	Vwa5b1	.	nonsynonymous SNV	Vwa5b1:NM_029401:exon22:c.G3481C:p.E1161Q	.	het	.	4	138569234	138569234	A	G	het	49.64	11
4	138569241	138569241	G	C	exonic	Vwa5b1	.	nonsynonymous SNV	Vwa5b1:NM_029401:exon22:c.T3474G:p.I1158M	.	het	.	4	138569241	138569241	G	C	het	49.64	11
4	138569248	138569248	A	G	exonic	Vwa5b1	.	nonsynonymous SNV	Vwa5b1:NM_029401:exon22:c.A3467C:p.Y1156S	.	het	.	4	138569248	138569248	A	G	het	52.64	10
4	138586561	138586561	T	C	exonic	Vwa5b1	.	nonsynonymous SNV	Vwa5b1:NM_029401:exon14:c.C2095G:p.Q699E	.	het	.	4	138586561	138586561	T	C	het	41.64	14
4	138752232	138752232	A	G	exonic	Pla2g2f	.	nonsynonymous SNV	Pla2g2f:NM_001360875:exon5:c.G487C:p.A163P,Pla2g2f:NM_012045:exon5:c.G613C:p.A205P	.	het	.	4	138752232	138752232	A	G	het	79.64	16
4	138752234	138752234	C	T	exonic	Pla2g2f	.	nonsynonymous SNV	Pla2g2f:NM_001360875:exon5:c.C485A:p.P162H,Pla2g2f:NM_012045:exon5:c.C611A:p.P204H	.	het	.	4	138752234	138752234	C	T	het	79.64	16
4	138882426	138882426	C	A	exonic	Pla2g2e	.	nonsynonymous SNV	Pla2g2e:NM_012044:exon5:c.G298A:p.A100T	.	het	.	4	138882426	138882426	C	A	het	31.64	17
4	138913711	138913711	T	C	exonic	Otud3	.	nonsynonymous SNV	Otud3:NM_001377089:exon1:c.C117G:p.N39K,Otud3:NM_028453:exon1:c.C117G:p.N39K	.	het	.	4	138913711	138913711	T	C	het	49.64	11
4	139058493	139058493	T	A	exonic	Tmco4	.	nonsynonymous SNV	Tmco4:NM_001305423:exon16:c.G1873A:p.E625K,Tmco4:NM_029857:exon17:c.G1873A:p.E625K	.	het	.	4	139058493	139058493	T	A	het	120.64	16
4	139074285	139074285	G	T	exonic	Htr6	.	nonsynonymous SNV	Htr6:NM_021358:exon1:c.C477A:p.F159L,Htr6:NM_001377096:exon2:c.C477A:p.F159L	.	het	.	4	139074285	139074285	G	T	het	45.64	29
4	139074355	139074355	A	G	exonic	Htr6	.	nonsynonymous SNV	Htr6:NM_021358:exon1:c.T407C:p.L136P,Htr6:NM_001377096:exon2:c.T407C:p.L136P	.	het	.	4	139074355	139074355	A	G	het	77.64	29
4	139194146	139194146	T	C	exonic	Capzb	.	nonsynonymous SNV	Capzb:NM_001271405:exon1:c.G17C:p.R6P	.	het	.	4	139194146	139194146	T	C	het	45.64	22
4	139257285	139257285	A	G	exonic	Capzb	.	nonsynonymous SNV	Capzb:NM_001037761:exon3:c.C118G:p.L40V,Capzb:NM_001271405:exon3:c.C205G:p.L69V,Capzb:NM_009798:exon3:c.C118G:p.L40V	.	het	.	4	139257285	139257285	A	G	het	84.64	13
4	139280030	139280030	A	G	exonic	Capzb	.	nonsynonymous SNV	Capzb:NM_001037761:exon5:c.T364G:p.W122G,Capzb:NM_001271405:exon5:c.T451G:p.W151G,Capzb:NM_009798:exon5:c.T364G:p.W122G	.	het	.	4	139280030	139280030	A	G	het	93.64	19
4	139280537	139280537	C	G	exonic	Capzb	.	nonsynonymous SNV	Capzb:NM_001037761:exon6:c.A541G:p.K181E,Capzb:NM_001271405:exon6:c.A628G:p.K210E,Capzb:NM_009798:exon6:c.A541G:p.K181E	.	het	.	4	139280537	139280537	C	G	het	112.64	20
4	139301054	139301054	T	C	exonic	Slc66a1	.	nonsynonymous SNV	Slc66a1:NM_145384:exon7:c.C576G:p.S192R	.	het	.	4	139301054	139301054	T	C	het	109.64	17
4	139301098	139301098	T	A	exonic	Slc66a1	.	nonsynonymous SNV	Slc66a1:NM_145384:exon7:c.A532T:p.T178S	.	het	.	4	139301098	139301098	T	A	het	166.64	17
4	139310996	139310996	G	A	exonic	Akr7a5	.	nonsynonymous SNV	Akr7a5:NM_025337:exon1:c.C242A:p.T81K	.	het	.	4	139310996	139310996	G	A	het	157.64	35
4	139311032	139311032	T	C	exonic	Akr7a5	.	nonsynonymous SNV	Akr7a5:NM_025337:exon1:c.T278C:p.I93T	.	het	.	4	139311032	139311032	T	C	het	103.64	34
4	139354857	139354857	C	A	exonic	Emc1	.	nonsynonymous SNV	Emc1:NM_001039200:exon3:c.C269A:p.A90D,Emc1:NM_146157:exon3:c.C269A:p.A90D	.	het	.	4	139354857	139354857	C	A	het	34.64	16
4	139359335	139359335	T	C	exonic	Emc1	.	nonsynonymous SNV	Emc1:NM_001039200:exon6:c.T608C:p.F203S,Emc1:NM_146157:exon6:c.T608C:p.F203S	.	het	.	4	139359335	139359335	T	C	het	65.64	33
4	139365252	139365252	A	G	exonic	Emc1	.	nonsynonymous SNV	Emc1:NM_001039200:exon14:c.C1493G:p.A498G,Emc1:NM_146157:exon15:c.C1502G:p.A501G	.	het	.	4	139365252	139365252	A	G	het	53.64	37
4	139365630	139365630	0	T	exonic	Emc1	.	nonsynonymous SNV	Emc1:NM_001039200:exon15:c.C1748T:p.P583L,Emc1:NM_146157:exon16:c.C1757T:p.P586L	.	het	.	4	139365630	139365630	-	T	het	77.60	34
4	139370963	139370963	A	G	exonic	Emc1	.	nonsynonymous SNV	Emc1:NM_001039200:exon19:c.A2245G:p.T749A,Emc1:NM_146157:exon20:c.A2254G:p.T752A	.	het	.	4	139370963	139370963	A	G	het	161.64	42
4	139371776	139371776	G	C	exonic	Emc1	.	nonsynonymous SNV	Emc1:NM_001039200:exon20:c.G2560C:p.E854Q,Emc1:NM_146157:exon21:c.G2569C:p.E857Q	.	het	.	4	139371776	139371776	G	C	het	146.64	18
4	139375347	139375347	G	A	exonic	Emc1	.	nonsynonymous SNV	Emc1:NM_001039200:exon23:c.T2807A:p.V936D,Emc1:NM_146157:exon24:c.T2816A:p.V939D	.	het	.	4	139375347	139375347	G	A	het	190.64	24
4	139375367	139375367	T	C	exonic	Emc1	.	nonsynonymous SNV	Emc1:NM_001039200:exon23:c.A2827C:p.I943L,Emc1:NM_146157:exon24:c.A2836C:p.I946L	.	het	.	4	139375367	139375367	T	C	het	187.64	25
4	139375379	139375379	A	G	exonic	Emc1	.	nonsynonymous SNV	Emc1:NM_001039200:exon23:c.C2839G:p.R947G,Emc1:NM_146157:exon24:c.C2848G:p.R950G	.	het	.	4	139375379	139375379	A	G	het	154.64	21
4	139375463	139375463	C	A	exonic	Emc1	.	nonsynonymous SNV	Emc1:NM_001039200:exon23:c.T2923A:p.F975I,Emc1:NM_146157:exon24:c.T2932A:p.F978I	.	het	.	4	139375463	139375463	C	A	het	87.64	20
4	139380786	139380786	C	T	exonic	Ubr4	.	nonsynonymous SNV	Ubr4:NM_001160319:exon1:c.C100T:p.R34W	.	het	.	4	139380786	139380786	C	T	het	60.64	18
4	139390929	139390929	G	A	exonic	Ubr4	.	nonsynonymous SNV	Ubr4:NM_001160319:exon3:c.T364A:p.C122S	.	het	.	4	139390929	139390929	G	A	het	22.64	20
4	139393377	139393377	G	A	exonic	Ubr4	.	nonsynonymous SNV	Ubr4:NM_001160319:exon8:c.C976A:p.L326M	.	het	.	4	139393377	139393377	G	A	het	43.64	13
4	139393386	139393386	C	T	exonic	Ubr4	.	nonsynonymous SNV	Ubr4:NM_001160319:exon8:c.G985T:p.V329L	.	het	.	4	139393386	139393386	C	T	het	49.64	11
4	139396669	139396669	A	G	exonic	Ubr4	.	nonsynonymous SNV	Ubr4:NM_001160319:exon9:c.T1131G:p.I377M	.	het	.	4	139396669	139396669	A	G	het	63.64	26
4	139397168	139397168	A	G	exonic	Ubr4	.	nonsynonymous SNV	Ubr4:NM_001160319:exon10:c.A1159G:p.M387V	.	het	.	4	139397168	139397168	A	G	het	23.64	14
4	139402549	139402549	C	T	exonic	Ubr4	.	nonsynonymous SNV	Ubr4:NM_001160319:exon16:c.C1979T:p.T660I	.	het	.	4	139402549	139402549	C	T	het	88.64	13
4	139402556	139402556	T	C	exonic	Ubr4	.	nonsynonymous SNV	Ubr4:NM_001160319:exon16:c.G1986C:p.M662I	.	het	.	4	139402556	139402556	T	C	het	88.64	13
4	139402557	139402557	C	G	exonic	Ubr4	.	nonsynonymous SNV	Ubr4:NM_001160319:exon16:c.C1987G:p.L663V	.	het	.	4	139402557	139402557	C	G	het	88.64	13
4	139414386	139414386	A	G	exonic	Ubr4	.	nonsynonymous SNV	Ubr4:NM_001160319:exon28:c.T3782G:p.I1261S	.	het	.	4	139414386	139414386	A	G	het	58.64	23
4	139414387	139414387	A	G	exonic	Ubr4	.	nonsynonymous SNV	Ubr4:NM_001160319:exon28:c.C3783G:p.I1261M	.	het	.	4	139414387	139414387	A	G	het	58.64	23
4	139414392	139414392	G	A	exonic	Ubr4	.	nonsynonymous SNV	Ubr4:NM_001160319:exon28:c.C3788A:p.A1263D	.	het	.	4	139414392	139414392	G	A	het	138.64	22
4	139414499	139414499	T	C	exonic	Ubr4	.	nonsynonymous SNV	Ubr4:NM_001160319:exon28:c.G3895C:p.V1299L	.	het	.	4	139414499	139414499	T	C	het	85.64	27
4	139415098	139415098	G	T	exonic	Ubr4	.	nonsynonymous SNV	Ubr4:NM_001160319:exon29:c.C3995T:p.S1332F	.	het	.	4	139415098	139415098	G	T	het	98.64	22
4	139421373	139421373	A	G	exonic	Ubr4	.	nonsynonymous SNV	Ubr4:NM_001160319:exon37:c.T5167G:p.C1723G	.	het	.	4	139421373	139421373	A	G	het	127.64	30
4	139421873	139421873	C	T	exonic	Ubr4	.	nonsynonymous SNV	Ubr4:NM_001160319:exon38:c.G5349T:p.K1783N	.	het	.	4	139421873	139421873	C	T	het	82.64	30
4	139428629	139428629	T	C	exonic	Ubr4	.	nonsynonymous SNV	Ubr4:NM_001160319:exon46:c.T6764C:p.L2255P	.	het	.	4	139428629	139428629	T	C	het	109.64	18
4	139428632	139428632	A	T	exonic	Ubr4	.	nonsynonymous SNV	Ubr4:NM_001160319:exon46:c.A6767T:p.Q2256L	.	het	.	4	139428632	139428632	A	T	het	76.64	17
4	139428635	139428635	A	G	exonic	Ubr4	.	nonsynonymous SNV	Ubr4:NM_001160319:exon46:c.C6770G:p.P2257R	.	het	.	4	139428635	139428635	A	G	het	76.64	17
4	139436223	139436223	A	G	exonic	Ubr4	.	nonsynonymous SNV	Ubr4:NM_001160319:exon53:c.C7900G:p.P2634A	.	het	.	4	139436223	139436223	A	G	het	60.64	24
4	139436241	139436241	T	C	exonic	Ubr4	.	nonsynonymous SNV	Ubr4:NM_001160319:exon53:c.G7918C:p.A2640P	.	het	.	4	139436241	139436241	T	C	het	148.64	23
4	139437182	139437182	C	T	exonic	Ubr4	.	nonsynonymous SNV	Ubr4:NM_001160319:exon54:c.G8046T:p.M2682I	.	het	.	4	139437182	139437182	C	T	het	69.64	18
4	139442698	139442698	A	G	exonic	Ubr4	.	nonsynonymous SNV	Ubr4:NM_001160319:exon59:c.A8597G:p.D2866G	.	het	.	4	139442698	139442698	A	G	het	166.64	17
4	139476185	139476185	C	T	exonic	Ubr4	.	nonsynonymous SNV	Ubr4:NM_001160319:exon98:c.A14257T:p.S4753C	.	het	.	4	139476185	139476185	C	T	het	31.64	17
4	139478947	139478947	A	G	exonic	Ubr4	.	nonsynonymous SNV	Ubr4:NM_001160319:exon100:c.C14565G:p.F4855L	.	het	.	4	139478947	139478947	A	G	het	50.64	19
4	139479026	139479026	C	T	exonic	Ubr4	.	nonsynonymous SNV	Ubr4:NM_001160319:exon100:c.A14644T:p.I4882F	.	het	.	4	139479026	139479026	C	T	het	39.64	28
4	139633732	139633732	A	G	exonic	Aldh4a1	.	nonsynonymous SNV	Aldh4a1:NM_175438:exon2:c.C77G:p.T26S	.	het	.	4	139633732	139633732	A	G	het	158.64	26
4	139633906	139633906	G	C	exonic	Aldh4a1	.	nonsynonymous SNV	Aldh4a1:NM_175438:exon3:c.G163C:p.D55H	.	het	.	4	139633906	139633906	G	C	het	177.64	23
4	139633976	139633976	C	G	exonic	Aldh4a1	.	nonsynonymous SNV	Aldh4a1:NM_175438:exon3:c.A233G:p.Q78R	.	het	.	4	139633976	139633976	C	G	het	274.64	26
4	139643538	139643538	A	G	exonic	Aldh4a1	.	nonsynonymous SNV	Aldh4a1:NM_175438:exon12:c.A1331G:p.K444R	.	het	.	4	139643538	139643538	A	G	het	163.64	20
4	139669786	139669786	C	T	exonic	Tas1r2	.	nonsynonymous SNV	Tas1r2:NM_031873:exon6:c.G2522T:p.R841M	.	het	.	4	139669786	139669786	C	T	het	45.64	11
4	139749132	139749132	T	C	exonic	Pax7	.	nonsynonymous SNV	Pax7:NM_011039:exon8:c.A1196G:p.Q399R	.	het	.	4	139749132	139749132	T	C	het	270.64	34
4	139749151	139749151	C	G	exonic	Pax7	.	nonsynonymous SNV	Pax7:NM_011039:exon8:c.G1177C:p.A393P	.	het	.	4	139749151	139749151	C	G	het	342.64	32
4	139780841	139780841	A	G	exonic	Pax7	.	nonsynonymous SNV	Pax7:NM_011039:exon6:c.G866C:p.G289A	.	het	.	4	139780841	139780841	A	G	het	62.64	16
4	139829564	139829564	C	T	exonic	Pax7	.	nonsynonymous SNV	Pax7:NM_011039:exon3:c.G384A:p.M128I	.	het	.	4	139829564	139829564	C	T	het	77.64	11
4	139830248	139830248	C	A	exonic	Pax7	.	nonsynonymous SNV	Pax7:NM_011039:exon2:c.G211T:p.V71F	.	het	.	4	139830248	139830248	C	A	het	331.64	22
4	139830266	139830266	G	A	exonic	Pax7	.	nonsynonymous SNV	Pax7:NM_011039:exon2:c.C193T:p.H65Y	.	het	.	4	139830266	139830266	G	A	het	331.64	22
4	139965366	139965366	C	T	exonic	Klhdc7a	.	nonsynonymous SNV	Klhdc7a:NM_173427:exon1:c.C2269A:p.L757M	.	het	.	4	139965366	139965366	C	T	het	268.64	22
4	139965993	139965993	A	G	exonic	Klhdc7a	.	nonsynonymous SNV	Klhdc7a:NM_173427:exon1:c.G1642C:p.G548R	.	het	.	4	139965993	139965993	A	G	het	32.64	13
4	139966286	139966286	T	C	exonic	Klhdc7a	.	nonsynonymous SNV	Klhdc7a:NM_173427:exon1:c.C1349G:p.A450G	.	het	.	4	139966286	139966286	T	C	het	81.64	11
4	139966317	139966317	G	C	exonic	Klhdc7a	.	nonsynonymous SNV	Klhdc7a:NM_173427:exon1:c.A1318G:p.R440G	.	het	.	4	139966317	139966317	G	C	het	84.64	10
4	139966827	139966827	C	T	exonic	Klhdc7a	.	nonsynonymous SNV	Klhdc7a:NM_173427:exon1:c.G808A:p.E270K	.	het	.	4	139966827	139966827	C	T	het	120.64	15
4	139967264	139967264	C	A	exonic	Klhdc7a	.	nonsynonymous SNV	Klhdc7a:NM_173427:exon1:c.A371T:p.E124V	.	het	.	4	139967264	139967264	C	A	het	179.64	19
4	139967275	139967275	A	G	exonic	Klhdc7a	.	nonsynonymous SNV	Klhdc7a:NM_173427:exon1:c.A360C:p.K120N	.	het	.	4	139967275	139967275	A	G	het	153.64	17
4	139967283	139967283	A	C	exonic	Klhdc7a	.	nonsynonymous SNV	Klhdc7a:NM_173427:exon1:c.A352G:p.T118A	.	het	.	4	139967283	139967283	A	C	het	120.64	16
4	139967288	139967288	T	G	exonic	Klhdc7a	.	nonsynonymous SNV	Klhdc7a:NM_173427:exon1:c.A347C:p.E116A	.	het	.	4	139967288	139967288	T	G	het	124.64	16
4	139967297	139967297	A	G	exonic	Klhdc7a	.	nonsynonymous SNV	Klhdc7a:NM_173427:exon1:c.G338C:p.R113T	.	het	.	4	139967297	139967297	A	G	het	166.64	17
4	139967442	139967442	A	G	exonic	Klhdc7a	.	nonsynonymous SNV	Klhdc7a:NM_173427:exon1:c.G193C:p.A65P	.	het	.	4	139967442	139967442	A	G	het	85.64	13
4	140027070	140027070	C	T	exonic	Igsf21	.	nonsynonymous SNV	Igsf21:NM_198610:exon10:c.T1342A:p.S448T	.	het	.	4	140027070	140027070	C	T	het	193.64	19
4	140037434	140037434	T	C	exonic	Igsf21	.	nonsynonymous SNV	Igsf21:NM_198610:exon5:c.C529G:p.P177A	.	het	.	4	140037434	140037434	T	C	het	76.64	13
4	140157540	140157540	C	T	exonic	Igsf21	.	nonsynonymous SNV	Igsf21:NM_198610:exon2:c.C104A:p.P35H	.	het	.	4	140157540	140157540	C	T	het	79.64	16
4	140515126	140515126	C	T	exonic	Arhgef10l	.	nonsynonymous SNV	Arhgef10l:NM_001112723:exon27:c.G3575A:p.C1192Y,Arhgef10l:NM_001112722:exon28:c.G3590A:p.C1197Y,Arhgef10l:NM_172415:exon28:c.G3692A:p.C1231Y,Arhgef10l:NM_001290803:exon29:c.G3707A:p.C1236Y	.	het	.	4	140515126	140515126	C	T	het	214.64	21
4	140515508	140515508	C	A	exonic	Arhgef10l	.	nonsynonymous SNV	Arhgef10l:NM_001112723:exon27:c.G3193T:p.G1065C,Arhgef10l:NM_001112722:exon28:c.G3208T:p.G1070C,Arhgef10l:NM_172415:exon28:c.G3310T:p.G1104C,Arhgef10l:NM_001290803:exon29:c.G3325T:p.G1109C	.	het	.	4	140515508	140515508	C	A	het	113.64	16
4	140521268	140521268	A	G	exonic	Arhgef10l	.	nonsynonymous SNV	Arhgef10l:NM_001112723:exon25:c.G2943C:p.W981C,Arhgef10l:NM_001112722:exon26:c.G2958C:p.W986C,Arhgef10l:NM_172415:exon26:c.G3060C:p.W1020C,Arhgef10l:NM_001290803:exon27:c.G3075C:p.W1025C	.	het	.	4	140521268	140521268	A	G	het	45.64	26
4	140536797	140536797	C	T	exonic	Arhgef10l	.	nonsynonymous SNV	Arhgef10l:NM_001112723:exon24:c.T2843A:p.V948E,Arhgef10l:NM_001112722:exon25:c.T2858A:p.V953E,Arhgef10l:NM_172415:exon25:c.T2960A:p.V987E,Arhgef10l:NM_001290803:exon26:c.T2975A:p.V992E	.	het	.	4	140536797	140536797	C	T	het	70.64	21
4	140544267	140544267	T	C	exonic	Arhgef10l	.	nonsynonymous SNV	Arhgef10l:NM_001112723:exon22:c.A2539G:p.T847A,Arhgef10l:NM_001112722:exon23:c.A2554G:p.T852A,Arhgef10l:NM_172415:exon23:c.A2656G:p.T886A,Arhgef10l:NM_001290803:exon24:c.A2671G:p.T891A	.	het	.	4	140544267	140544267	T	C	het	179.64	33
4	140544304	140544304	C	T	exonic	Arhgef10l	.	nonsynonymous SNV	Arhgef10l:NM_001112723:exon22:c.C2502A:p.S834R,Arhgef10l:NM_001112722:exon23:c.C2517A:p.S839R,Arhgef10l:NM_172415:exon23:c.C2619A:p.S873R,Arhgef10l:NM_001290803:exon24:c.C2634A:p.S878R	.	het	.	4	140544304	140544304	C	T	het	230.64	35
4	140544337	140544337	C	T	exonic	Arhgef10l	.	nonsynonymous SNV	Arhgef10l:NM_001112723:exon22:c.T2469A:p.D823E,Arhgef10l:NM_001112722:exon23:c.T2484A:p.D828E,Arhgef10l:NM_172415:exon23:c.T2586A:p.D862E,Arhgef10l:NM_001290803:exon24:c.T2601A:p.D867E	.	het	.	4	140544337	140544337	C	T	het	240.64	29
4	140552580	140552580	C	T	exonic	Arhgef10l	.	nonsynonymous SNV	Arhgef10l:NM_001112723:exon20:c.C2204A:p.P735H,Arhgef10l:NM_001112722:exon21:c.C2219A:p.P740H,Arhgef10l:NM_172415:exon21:c.C2321A:p.P774H,Arhgef10l:NM_001290803:exon22:c.C2336A:p.P779H	.	het	.	4	140552580	140552580	C	T	het	213.64	34
4	140552583	140552583	C	T	exonic	Arhgef10l	.	nonsynonymous SNV	Arhgef10l:NM_001112723:exon20:c.G2201A:p.C734Y,Arhgef10l:NM_001112722:exon21:c.G2216A:p.C739Y,Arhgef10l:NM_172415:exon21:c.G2318A:p.C773Y,Arhgef10l:NM_001290803:exon22:c.G2333A:p.C778Y	.	het	.	4	140552583	140552583	C	T	het	222.64	31
4	140552620	140552620	G	A	exonic	Arhgef10l	.	nonsynonymous SNV	Arhgef10l:NM_001112723:exon20:c.C2164T:p.P722S,Arhgef10l:NM_001112722:exon21:c.C2179T:p.P727S,Arhgef10l:NM_172415:exon21:c.C2281T:p.P761S,Arhgef10l:NM_001290803:exon22:c.C2296T:p.P766S	.	het	.	4	140552620	140552620	G	A	het	32.64	41
4	140552635	140552635	C	T	exonic	Arhgef10l	.	nonsynonymous SNV	Arhgef10l:NM_001112723:exon20:c.C2149A:p.P717T,Arhgef10l:NM_001112722:exon21:c.C2164A:p.P722T,Arhgef10l:NM_172415:exon21:c.C2266A:p.P756T,Arhgef10l:NM_001290803:exon22:c.C2281A:p.P761T	.	het	.	4	140552635	140552635	C	T	het	151.64	39
4	140562725	140562725	C	A	exonic	Arhgef10l	.	nonsynonymous SNV	Arhgef10l:NM_001112723:exon19:c.A2123T:p.K708M,Arhgef10l:NM_001112722:exon20:c.A2138T:p.K713M,Arhgef10l:NM_172415:exon20:c.A2240T:p.K747M,Arhgef10l:NM_001290803:exon21:c.A2255T:p.K752M	.	het	.	4	140562725	140562725	C	A	het	200.64	22
4	140562773	140562773	G	C	exonic	Arhgef10l	.	nonsynonymous SNV	Arhgef10l:NM_001112723:exon19:c.C2075G:p.P692R,Arhgef10l:NM_001112722:exon20:c.C2090G:p.P697R,Arhgef10l:NM_172415:exon20:c.C2192G:p.P731R,Arhgef10l:NM_001290803:exon21:c.C2207G:p.P736R	.	het	.	4	140562773	140562773	G	C	het	311.64	25
4	140564200	140564200	T	A	exonic	Arhgef10l	.	nonsynonymous SNV	Arhgef10l:NM_001112723:exon18:c.G2020T:p.G674W,Arhgef10l:NM_001112722:exon19:c.G2035T:p.G679W,Arhgef10l:NM_172415:exon19:c.G2137T:p.G713W,Arhgef10l:NM_001290803:exon20:c.G2152T:p.G718W	.	het	.	4	140564200	140564200	T	A	het	358.64	33
4	140568400	140568400	A	G	exonic	Arhgef10l	.	nonsynonymous SNV	Arhgef10l:NM_001112723:exon16:c.A1728C:p.K576N,Arhgef10l:NM_001112722:exon17:c.A1743C:p.K581N,Arhgef10l:NM_172415:exon17:c.A1845C:p.K615N,Arhgef10l:NM_001290803:exon18:c.A1860C:p.K620N	.	het	.	4	140568400	140568400	A	G	het	69.64	45
4	140579296	140579296	T	C	exonic	Arhgef10l	.	nonsynonymous SNV	Arhgef10l:NM_001112722:exon11:c.A1049G:p.E350G,Arhgef10l:NM_001112723:exon11:c.A1049G:p.E350G,Arhgef10l:NM_001290803:exon12:c.A1166G:p.E389G,Arhgef10l:NM_172415:exon12:c.A1166G:p.E389G	.	het	.	4	140579296	140579296	T	C	het	144.64	23
4	140579306	140579306	T	G	exonic	Arhgef10l	.	nonsynonymous SNV	Arhgef10l:NM_001112722:exon11:c.G1039C:p.D347H,Arhgef10l:NM_001112723:exon11:c.G1039C:p.D347H,Arhgef10l:NM_001290803:exon12:c.G1156C:p.D386H,Arhgef10l:NM_172415:exon12:c.G1156C:p.D386H	.	het	.	4	140579306	140579306	T	G	het	141.64	24
4	140579426	140579426	C	T	exonic	Arhgef10l	.	nonsynonymous SNV	Arhgef10l:NM_001112722:exon11:c.G919A:p.E307K,Arhgef10l:NM_001112723:exon11:c.G919A:p.E307K,Arhgef10l:NM_001290803:exon12:c.G1036A:p.E346K,Arhgef10l:NM_172415:exon12:c.G1036A:p.E346K	.	het	.	4	140579426	140579426	C	T	het	98.64	22
4	140583833	140583833	A	G	exonic	Arhgef10l	.	nonsynonymous SNV	Arhgef10l:NM_001112722:exon8:c.G703C:p.D235H,Arhgef10l:NM_001112723:exon8:c.G703C:p.D235H,Arhgef10l:NM_001290803:exon9:c.G820C:p.D274H,Arhgef10l:NM_172415:exon9:c.G820C:p.D274H	.	het	.	4	140583833	140583833	A	G	het	289.64	21
4	140586869	140586869	T	A	exonic	Arhgef10l	.	nonsynonymous SNV	Arhgef10l:NM_001290803:exon8:c.G635T:p.R212I,Arhgef10l:NM_172415:exon8:c.G635T:p.R212I	.	het	.	4	140586869	140586869	T	A	het	163.64	25
4	140721157	140721157	T	C	exonic	Rcc2	.	nonsynonymous SNV	Rcc2:NM_173867:exon13:c.A1516C:p.K506Q	.	het	.	4	140721157	140721157	T	C	het	145.64	32
4	140727781	140727781	T	C	exonic	Padi6	.	nonsynonymous SNV	Padi6:NM_153106:exon16:c.T1844G:p.L615R	.	het	.	4	140727781	140727781	T	C	het	48.64	22
4	140731183	140731183	T	C	exonic	Padi6	.	nonsynonymous SNV	Padi6:NM_153106:exon12:c.C1397G:p.T466S	.	het	.	4	140731183	140731183	T	C	het	310.64	29
4	140739085	140739085	G	A	exonic	Padi6	.	nonsynonymous SNV	Padi6:NM_153106:exon5:c.G512T:p.G171V	.	het	.	4	140739085	140739085	G	A	het	234.64	25
4	140741842	140741842	G	T	exonic	Padi6	.	nonsynonymous SNV	Padi6:NM_153106:exon2:c.C186A:p.D62E	.	het	.	4	140741842	140741842	G	T	het	150.64	31
4	140748121	140748121	C	T	exonic	Padi4	.	nonsynonymous SNV	Padi4:NM_011061:exon15:c.G1732A:p.G578R	.	het	.	4	140748121	140748121	C	T	het	136.64	28
4	140752625	140752625	G	A	exonic	Padi4	.	nonsynonymous SNV	Padi4:NM_011061:exon11:c.G1216T:p.A406S	.	het	.	4	140752625	140752625	G	A	het	155.64	15
4	140756420	140756420	A	G	exonic	Padi4	.	nonsynonymous SNV	Padi4:NM_011061:exon10:c.T1108C:p.S370P	.	het	.	4	140756420	140756420	A	G	het	175.64	29
4	140756426	140756426	C	T	exonic	Padi4	.	nonsynonymous SNV	Padi4:NM_011061:exon10:c.T1102A:p.F368I	.	het	.	4	140756426	140756426	C	T	het	218.64	28
4	140757538	140757538	A	C	exonic	Padi4	.	nonsynonymous SNV	Padi4:NM_011061:exon9:c.C1011G:p.C337W	.	het	.	4	140757538	140757538	A	C	het	249.64	38
4	140758087	140758087	C	G	exonic	Padi4	.	nonsynonymous SNV	Padi4:NM_011061:exon7:c.T766C:p.F256L	.	het	.	4	140758087	140758087	C	G	het	185.64	26
4	140759965	140759965	T	C	exonic	Padi4	.	nonsynonymous SNV	Padi4:NM_011061:exon6:c.A625G:p.N209D	.	het	.	4	140759965	140759965	T	C	het	170.64	22
4	140759983	140759983	G	A	exonic	Padi4	.	nonsynonymous SNV	Padi4:NM_011061:exon6:c.G607T:p.V203L	.	het	.	4	140759983	140759983	G	A	het	124.64	21
4	140760001	140760001	T	C	exonic	Padi4	.	nonsynonymous SNV	Padi4:NM_011061:exon6:c.T589G:p.Y197D	.	het	.	4	140760001	140760001	T	C	het	182.64	23
4	140761630	140761630	C	T	exonic	Padi4	.	nonsynonymous SNV	Padi4:NM_011061:exon5:c.T497A:p.F166Y	.	het	.	4	140761630	140761630	C	T	het	278.64	36
4	140765571	140765571	C	T	exonic	Padi4	.	nonsynonymous SNV	Padi4:NM_011061:exon3:c.G340A:p.E114K	.	het	.	4	140765571	140765571	C	T	het	286.64	37
4	140765573	140765573	C	G	exonic	Padi4	.	nonsynonymous SNV	Padi4:NM_011061:exon3:c.T338C:p.V113A	.	het	.	4	140765573	140765573	C	G	het	286.64	37
4	140765588	140765588	C	G	exonic	Padi4	.	nonsynonymous SNV	Padi4:NM_011061:exon3:c.T323C:p.I108T	.	het	.	4	140765588	140765588	C	G	het	331.64	37
4	140765589	140765589	A	G	exonic	Padi4	.	nonsynonymous SNV	Padi4:NM_011061:exon3:c.A322C:p.I108L	.	het	.	4	140765589	140765589	A	G	het	331.64	37
4	140786418	140786418	T	C	exonic	Padi3	.	nonsynonymous SNV	Padi3:NM_011060:exon16:c.T1978G:p.W660G	.	het	.	4	140786418	140786418	T	C	het	75.64	13
4	140786583	140786583	A	T	exonic	Padi3	.	nonsynonymous SNV	Padi3:NM_011060:exon16:c.C1813A:p.P605T	.	het	.	4	140786583	140786583	A	T	het	74.64	11
4	140793905	140793905	T	C	exonic	Padi3	.	nonsynonymous SNV	Padi3:NM_011060:exon10:c.A1087G:p.T363A	.	het	.	4	140793905	140793905	T	C	het	315.64	28
4	140795853	140795853	G	A	exonic	Padi3	.	nonsynonymous SNV	Padi3:NM_011060:exon8:c.A895T:p.T299S	.	het	.	4	140795853	140795853	G	A	het	266.64	28
4	140796465	140796465	T	C	exonic	Padi3	.	nonsynonymous SNV	Padi3:NM_011060:exon7:c.A703G:p.M235V	.	het	.	4	140796465	140796465	T	C	het	403.64	38
4	140798156	140798156	C	T	exonic	Padi3	.	nonsynonymous SNV	Padi3:NM_011060:exon6:c.T545A:p.V182D	.	het	.	4	140798156	140798156	C	T	het	303.64	37
4	140798961	140798961	G	A	exonic	Padi3	.	nonsynonymous SNV	Padi3:NM_011060:exon5:c.A470T:p.D157V	.	het	.	4	140798961	140798961	G	A	het	171.64	40
4	140826866	140826866	A	G	exonic	Padi1	.	nonsynonymous SNV	Padi1:NM_011059:exon9:c.A1027C:p.N343H	.	het	.	4	140826866	140826866	A	G	het	31.64	14
4	140828203	140828203	T	G	exonic	Padi1	.	nonsynonymous SNV	Padi1:NM_011059:exon7:c.T710C:p.V237A	.	het	.	4	140828203	140828203	T	G	het	32.64	14
4	140832420	140832420	T	C	exonic	Padi1	.	nonsynonymous SNV	Padi1:NM_011059:exon2:c.A145G:p.K49E	.	het	.	4	140832420	140832420	T	C	het	212.64	25
4	140932157	140932157	A	G	exonic	Padi2	.	nonsynonymous SNV	Padi2:NM_008812:exon7:c.T772G:p.F258V	.	het	.	4	140932157	140932157	A	G	het	110.64	17
4	140933216	140933216	G	A	exonic	Padi2	.	nonsynonymous SNV	Padi2:NM_008812:exon9:c.G1006A:p.V336M	.	het	.	4	140933216	140933216	G	A	het	313.64	13
4	140934665	140934665	G	A	exonic	Padi2	.	nonsynonymous SNV	Padi2:NM_008812:exon10:c.T1124A:p.V375E	.	het	.	4	140934665	140934665	G	A	het	229.64	26
4	140934674	140934674	0	T	exonic	Padi2	.	nonsynonymous SNV	Padi2:NM_008812:exon10:c.A1133T:p.D378V	.	het	.	4	140934674	140934674	-	T	het	235.60	24
4	140934705	140934705	C	G	exonic	Padi2	.	nonsynonymous SNV	Padi2:NM_008812:exon10:c.C1164G:p.F388L	.	het	.	4	140934705	140934705	C	G	het	151.64	22
4	140938041	140938041	G	A	exonic	Padi2	.	nonsynonymous SNV	Padi2:NM_008812:exon12:c.T1456A:p.F486I	.	het	.	4	140938041	140938041	G	A	het	223.64	28
4	140946696	140946696	C	T	exonic	Padi2	.	nonsynonymous SNV	Padi2:NM_008812:exon14:c.G1592T:p.S531I	.	het	.	4	140946696	140946696	C	T	het	74.64	27
4	140946744	140946744	A	G	exonic	Padi2	.	nonsynonymous SNV	Padi2:NM_008812:exon14:c.A1640G:p.Q547R	.	het	.	4	140946744	140946744	A	G	het	142.64	28
4	140977408	140977408	C	T	exonic	Sdhb	.	nonsynonymous SNV	Sdhb:NM_001355515:exon7:c.G673T:p.D225Y,Sdhb:NM_023374:exon7:c.G679T:p.D227Y	.	het	.	4	140977408	140977408	C	T	het	82.64	15
4	140977418	140977418	A	C	exonic	Sdhb	.	nonsynonymous SNV	Sdhb:NM_001355515:exon7:c.A683C:p.E228A,Sdhb:NM_023374:exon7:c.A689C:p.E230A	.	het	.	4	140977418	140977418	A	C	het	85.64	14
4	140977421	140977421	A	T	exonic	Sdhb	.	nonsynonymous SNV	Sdhb:NM_001355515:exon7:c.A686T:p.E229V,Sdhb:NM_023374:exon7:c.A692T:p.E231V	.	het	.	4	140977421	140977421	A	T	het	85.64	14
4	141000694	141000694	0	G	exonic	Atp13a2	.	nonsynonymous SNV	Atp13a2:NM_001164366:exon15:c.A1348G:p.R450G,Atp13a2:NM_001379619:exon15:c.A1345G:p.R449G,Atp13a2:NM_001379620:exon15:c.A1345G:p.R449G,Atp13a2:NM_001379621:exon15:c.A1345G:p.R449G,Atp13a2:NM_001379622:exon15:c.A1348G:p.R450G,Atp13a2:NM_029097:exon15:c.A1348G:p.R450G	.	het	.	4	141000694	141000694	-	G	het	91.60	27
4	141000830	141000830	C	T	exonic	Atp13a2	.	nonsynonymous SNV	Atp13a2:NM_001164366:exon15:c.G1484T:p.R495L,Atp13a2:NM_001379619:exon15:c.G1481T:p.R494L,Atp13a2:NM_001379620:exon15:c.G1481T:p.R494L,Atp13a2:NM_001379621:exon15:c.G1481T:p.R494L,Atp13a2:NM_001379622:exon15:c.G1484T:p.R495L,Atp13a2:NM_029097:exon15:c.G1484T:p.R495L	.	het	.	4	141000830	141000830	C	T	het	159.64	23
4	141000863	141000863	C	T	exonic	Atp13a2	.	nonsynonymous SNV	Atp13a2:NM_001164366:exon15:c.G1517T:p.C506F,Atp13a2:NM_001379619:exon15:c.G1514T:p.C505F,Atp13a2:NM_001379620:exon15:c.G1514T:p.C505F,Atp13a2:NM_001379621:exon15:c.G1514T:p.C505F,Atp13a2:NM_001379622:exon15:c.G1517T:p.C506F,Atp13a2:NM_029097:exon15:c.G1517T:p.C506F	.	het	.	4	141000863	141000863	C	T	het	226.64	27
4	141002779	141002779	G	C	exonic	Atp13a2	.	nonsynonymous SNV	Atp13a2:NM_001164366:exon18:c.G1980C:p.E660D,Atp13a2:NM_001379619:exon18:c.G1977C:p.E659D,Atp13a2:NM_001379620:exon18:c.G1977C:p.E659D,Atp13a2:NM_001379621:exon18:c.G1977C:p.E659D,Atp13a2:NM_001379622:exon18:c.G1980C:p.E660D,Atp13a2:NM_029097:exon18:c.G1980C:p.E660D	.	het	.	4	141002779	141002779	G	C	het	247.64	30
4	141005285	141005285	G	A	exonic	Atp13a2	.	nonsynonymous SNV	Atp13a2:NM_001164366:exon25:c.G2749A:p.D917N,Atp13a2:NM_001379619:exon25:c.G2746A:p.D916N,Atp13a2:NM_001379620:exon25:c.G2746A:p.D916N,Atp13a2:NM_001379621:exon25:c.G2746A:p.D916N,Atp13a2:NM_001379622:exon25:c.G2749A:p.D917N,Atp13a2:NM_029097:exon25:c.G2749A:p.D917N	.	het	.	4	141005285	141005285	G	A	het	251.64	20
4	141014065	141014065	C	T	exonic	Mfap2	.	nonsynonymous SNV	Mfap2:NM_001161799:exon4:c.A134T:p.D45V,Mfap2:NM_001369292:exon4:c.A76T:p.T26S,Mfap2:NM_008546:exon4:c.A134T:p.D45V	.	het	.	4	141014065	141014065	C	T	het	25.64	16
4	141014077	141014077	G	T	exonic	Mfap2	.	nonsynonymous SNV	Mfap2:NM_001161799:exon4:c.A146T:p.Y49F,Mfap2:NM_001369292:exon4:c.A88T:p.T30S,Mfap2:NM_008546:exon4:c.A146T:p.Y49F	.	het	.	4	141014077	141014077	G	T	het	68.64	17
4	141014216	141014216	A	G	exonic	Mfap2	.	nonsynonymous SNV	Mfap2:NM_001161799:exon5:c.A179G:p.Q60R,Mfap2:NM_001369292:exon5:c.A149G:p.Q50R,Mfap2:NM_008546:exon5:c.A179G:p.Q60R	.	het	.	4	141014216	141014216	A	G	het	197.64	24
4	141014249	141014249	A	G	exonic	Mfap2	.	nonsynonymous SNV	Mfap2:NM_001161799:exon5:c.T212G:p.V71G,Mfap2:NM_001369292:exon5:c.T182G:p.V61G,Mfap2:NM_008546:exon5:c.T212G:p.V71G	.	het	.	4	141014249	141014249	A	G	het	157.64	20
4	141015062	141015062	C	G	exonic	Mfap2	.	nonsynonymous SNV	Mfap2:NM_001161799:exon7:c.C366G:p.C122W,Mfap2:NM_001369292:exon7:c.C336G:p.C112W,Mfap2:NM_008546:exon7:c.C366G:p.C122W	.	het	.	4	141015062	141015062	C	G	het	107.64	16
4	141015501	141015501	0	T	exonic	Mfap2	.	nonsynonymous SNV	Mfap2:NM_001161799:exon9:c.C473T:p.S158F,Mfap2:NM_001369292:exon9:c.C443T:p.S148F,Mfap2:NM_008546:exon9:c.C473T:p.S158F	.	het	.	4	141015501	141015501	-	T	het	159.60	14
4	141018021	141018021	G	A	exonic	Crocc	.	nonsynonymous SNV	Crocc:NM_001145958:exon35:c.G5284T:p.V1762L,Crocc:NM_172122:exon36:c.G5776T:p.V1926L	.	het	.	4	141018021	141018021	G	A	het	93.64	10
4	141018321	141018321	0	T	exonic	Crocc	.	nonsynonymous SNV	Crocc:NM_001145958:exon34:c.C5200A:p.R1734S,Crocc:NM_172122:exon35:c.C5692A:p.R1898S	.	het	.	4	141018321	141018321	-	T	het	135.60	22
4	141020290	141020290	A	C	exonic	Crocc	.	nonsynonymous SNV	Crocc:NM_001145958:exon30:c.A4547G:p.D1516G,Crocc:NM_172122:exon31:c.A5039G:p.D1680G	.	het	.	4	141020290	141020290	A	C	het	124.64	24
4	141021674	141021674	A	G	exonic	Crocc	.	nonsynonymous SNV	Crocc:NM_001145958:exon29:c.A4327C:p.S1443R,Crocc:NM_172122:exon30:c.A4819C:p.S1607R	.	het	.	4	141021674	141021674	A	G	het	197.64	21
4	141025475	141025475	A	G	exonic	Crocc	.	nonsynonymous SNV	Crocc:NM_001145958:exon26:c.G3613C:p.G1205R,Crocc:NM_172122:exon27:c.G4105C:p.G1369R	.	het	.	4	141025475	141025475	A	G	het	31.64	17
4	141026192	141026192	T	G	exonic	Crocc	.	nonsynonymous SNV	Crocc:NM_001145958:exon25:c.A3452C:p.E1151A,Crocc:NM_172122:exon26:c.A3944C:p.E1315A	.	het	.	4	141026192	141026192	T	G	het	79.64	12
4	141028372	141028372	T	A	exonic	Crocc	.	nonsynonymous SNV	Crocc:NM_001145958:exon24:c.C3344T:p.A1115V,Crocc:NM_172122:exon25:c.C3836T:p.A1279V	.	het	.	4	141028372	141028372	T	A	het	118.64	11
4	141030222	141030222	T	C	exonic	Crocc	.	nonsynonymous SNV	Crocc:NM_001145958:exon21:c.A2759G:p.H920R,Crocc:NM_172122:exon22:c.A3251G:p.H1084R	.	het	.	4	141030222	141030222	T	C	het	235.64	25
4	141030942	141030942	T	C	exonic	Crocc	.	nonsynonymous SNV	Crocc:NM_001145958:exon20:c.C2647G:p.Q883E,Crocc:NM_172122:exon21:c.C3139G:p.Q1047E	.	het	.	4	141030942	141030942	T	C	het	277.64	25
4	141031016	141031016	A	G	exonic	Crocc	.	nonsynonymous SNV	Crocc:NM_001145958:exon20:c.A2573C:p.Q858P,Crocc:NM_172122:exon21:c.A3065C:p.Q1022P	.	het	.	4	141031016	141031016	A	G	het	167.64	23
4	141034059	141034059	G	A	exonic	Crocc	.	nonsynonymous SNV	Crocc:NM_001145958:exon18:c.G2262T:p.Q754H,Crocc:NM_172122:exon19:c.G2754T:p.Q918H	.	het	.	4	141034059	141034059	G	A	het	95.64	23
4	141034362	141034362	C	T	exonic	Crocc	.	nonsynonymous SNV	Crocc:NM_001145958:exon17:c.T2216A:p.L739Q,Crocc:NM_172122:exon18:c.T2708A:p.L903Q	.	het	.	4	141034362	141034362	C	T	het	67.64	16
4	141035194	141035194	T	C	exonic	Crocc	.	nonsynonymous SNV	Crocc:NM_001145958:exon16:c.C1984G:p.L662V,Crocc:NM_172122:exon17:c.C2476G:p.L826V	.	het	.	4	141035194	141035194	T	C	het	199.64	29
4	141035707	141035707	T	C	exonic	Crocc	.	nonsynonymous SNV	Crocc:NM_001145958:exon15:c.T1774G:p.L592V,Crocc:NM_172122:exon16:c.T2266G:p.L756V	.	het	.	4	141035707	141035707	T	C	het	76.64	32
4	141036701	141036701	0	G	exonic	Crocc	.	nonsynonymous SNV	Crocc:NM_001145958:exon14:c.G1630C:p.A544P,Crocc:NM_172122:exon15:c.G2122C:p.A708P	.	het	.	4	141036701	141036701	-	G	het	168.60	24
4	141041150	141041150	A	G	exonic	Crocc	.	nonsynonymous SNV	Crocc:NM_001145958:exon12:c.G1129C:p.G377R,Crocc:NM_172122:exon13:c.G1621C:p.G541R	.	het	.	4	141041150	141041150	A	G	het	250.64	19
4	141045966	141045966	A	G	exonic	Crocc	.	nonsynonymous SNV	Crocc:NM_001145958:exon7:c.A445C:p.S149R,Crocc:NM_172122:exon8:c.A937C:p.S313R	.	het	.	4	141045966	141045966	A	G	het	79.64	24
4	141046011	141046011	T	C	exonic	Crocc	.	nonsynonymous SNV	Crocc:NM_001145958:exon7:c.C400G:p.L134V,Crocc:NM_172122:exon8:c.C892G:p.L298V	.	het	.	4	141046011	141046011	T	C	het	85.64	22
4	141046493	141046493	T	G	exonic	Crocc	.	nonsynonymous SNV	Crocc:NM_001145958:exon6:c.A262C:p.N88H,Crocc:NM_172122:exon7:c.A754C:p.N252H	.	het	.	4	141046493	141046493	T	G	het	272.64	23
4	141046504	141046504	G	C	exonic	Crocc	.	nonsynonymous SNV	Crocc:NM_001145958:exon6:c.C251G:p.A84G,Crocc:NM_172122:exon7:c.C743G:p.A248G	.	het	.	4	141046504	141046504	G	C	het	202.64	20
4	141046777	141046777	A	C	exonic	Crocc	.	nonsynonymous SNV	Crocc:NM_172122:exon5:c.C622G:p.L208V	.	het	.	4	141046777	141046777	A	C	het	28.64	15
4	141051073	141051073	C	T	exonic	Crocc	.	nonsynonymous SNV	Crocc:NM_172122:exon3:c.C325A:p.L109M,Crocc:NM_001145958:exon4:c.C103A:p.L35M	.	het	.	4	141051073	141051073	C	T	het	39.64	25
4	141074994	141074994	A	G	exonic	Necap2	.	nonsynonymous SNV	Necap2:NM_025383:exon2:c.G159C:p.K53N	.	het	.	4	141074994	141074994	A	G	het	213.64	20
4	141078256	141078256	G	A	exonic	Necap2	.	nonsynonymous SNV	Necap2:NM_025383:exon1:c.C49T:p.H17Y	.	het	.	4	141078256	141078256	G	A	het	71.64	13
4	141090554	141090554	A	T	exonic	Spata21	.	nonsynonymous SNV	Spata21:NM_177867:exon3:c.A92T:p.K31M	.	het	.	4	141090554	141090554	A	T	het	253.64	32
4	141092148	141092148	A	G	exonic	Spata21	.	nonsynonymous SNV	Spata21:NM_177867:exon4:c.A163G:p.K55E	.	het	.	4	141092148	141092148	A	G	het	247.64	35
4	141092155	141092155	C	T	exonic	Spata21	.	nonsynonymous SNV	Spata21:NM_177867:exon4:c.C170T:p.P57L	.	het	.	4	141092155	141092155	C	T	het	280.64	36
4	141096902	141096902	A	G	exonic	Spata21	.	nonsynonymous SNV	Spata21:NM_177867:exon6:c.C475G:p.P159A	.	het	.	4	141096902	141096902	A	G	het	230.64	28
4	141097014	141097014	C	T	exonic	Spata21	.	nonsynonymous SNV	Spata21:NM_177867:exon6:c.A587T:p.D196V	.	het	.	4	141097014	141097014	C	T	het	217.64	34
4	141103965	141103965	T	C	exonic	Spata21	.	nonsynonymous SNV	Spata21:NM_177867:exon9:c.G1222C:p.E408Q	.	het	.	4	141103965	141103965	T	C	het	61.64	18
4	141107345	141107345	A	T	exonic	Spata21	.	nonsynonymous SNV	Spata21:NM_177867:exon12:c.A1529T:p.D510V	.	het	.	4	141107345	141107345	A	T	het	131.64	19
4	141111318	141111318	T	C	exonic	Spata21	.	nonsynonymous SNV	Spata21:NM_177867:exon13:c.A1679C:p.E560A	.	het	.	4	141111318	141111318	T	C	het	334.64	36
4	141111323	141111323	A	T	exonic	Spata21	.	nonsynonymous SNV	Spata21:NM_177867:exon13:c.G1684T:p.A562S	.	het	.	4	141111323	141111323	A	T	het	368.64	41
4	141111386	141111386	T	C	exonic	Spata21	.	nonsynonymous SNV	Spata21:NM_177867:exon13:c.G1747C:p.E583Q	.	het	.	4	141111386	141111386	T	C	het	187.91	26
4	141111993	141111993	T	C	exonic	Spata21	.	nonsynonymous SNV	Spata21:NM_177867:exon14:c.G1818C:p.Q606H	.	het	.	4	141111993	141111993	T	C	het	376.64	30
4	141115797	141115797	G	C	exonic	Szrd1	.	nonsynonymous SNV	Szrd1:NM_001025608:exon4:c.C424G:p.P142A,Szrd1:NM_001277195:exon4:c.C421G:p.P141A	.	het	.	4	141115797	141115797	G	C	het	150.64	18
4	141118608	141118608	A	G	exonic	Szrd1	.	nonsynonymous SNV	Szrd1:NM_001025608:exon3:c.A275C:p.E92A,Szrd1:NM_001277195:exon3:c.A272C:p.E91A	.	het	.	4	141118608	141118608	A	G	het	350.64	24
4	141118702	141118702	T	C	exonic	Szrd1	.	nonsynonymous SNV	Szrd1:NM_001025608:exon3:c.C181G:p.R61G,Szrd1:NM_001277195:exon3:c.C178G:p.R60G	.	het	.	4	141118702	141118702	T	C	het	242.64	21
4	141118738	141118738	G	A	exonic	Szrd1	.	nonsynonymous SNV	Szrd1:NM_001025608:exon3:c.G145T:p.D49Y,Szrd1:NM_001277195:exon3:c.G142T:p.D48Y	.	het	.	4	141118738	141118738	G	A	het	241.64	22
4	141118746	141118746	A	C	exonic	Szrd1	.	nonsynonymous SNV	Szrd1:NM_001025608:exon3:c.T137G:p.V46G,Szrd1:NM_001277195:exon3:c.T134G:p.V45G	.	het	.	4	141118746	141118746	A	C	het	238.64	23
4	141118770	141118770	G	A	exonic	Szrd1	.	nonsynonymous SNV	Szrd1:NM_001025608:exon3:c.A113T:p.K38I,Szrd1:NM_001277195:exon3:c.A110T:p.K37I	.	het	.	4	141118770	141118770	G	A	het	199.64	21
4	141470564	141470564	G	A	exonic	Spen	.	nonsynonymous SNV	Spen:NM_001347235:exon12:c.C9923T:p.P3308L,Spen:NM_019763:exon13:c.C9992T:p.P3331L	.	het	.	4	141470564	141470564	G	A	het	38.64	12
4	141471929	141471929	T	C	exonic	Spen	.	nonsynonymous SNV	Spen:NM_001347235:exon11:c.C9317G:p.P3106R,Spen:NM_019763:exon12:c.C9386G:p.P3129R	.	het	.	4	141471929	141471929	T	C	het	127.64	23
4	141474303	141474303	T	C	exonic	Spen	.	nonsynonymous SNV	Spen:NM_001347235:exon11:c.C6943G:p.R2315G,Spen:NM_019763:exon12:c.C7012G:p.R2338G	.	het	.	4	141474303	141474303	T	C	het	60.64	32
4	141474389	141474389	C	T	exonic	Spen	.	nonsynonymous SNV	Spen:NM_001347235:exon11:c.G6857A:p.S2286N,Spen:NM_019763:exon12:c.G6926A:p.S2309N	.	het	.	4	141474389	141474389	C	T	het	54.64	20
4	141475998	141475998	T	C	exonic	Spen	.	nonsynonymous SNV	Spen:NM_001347235:exon11:c.A5248G:p.S1750G,Spen:NM_019763:exon12:c.A5317G:p.S1773G	.	het	.	4	141475998	141475998	T	C	het	97.64	10
4	141476547	141476547	A	T	exonic	Spen	.	nonsynonymous SNV	Spen:NM_001347235:exon11:c.G4699A:p.D1567N,Spen:NM_019763:exon12:c.G4768A:p.D1590N	.	het	.	4	141476547	141476547	A	T	het	49.64	11
4	141476550	141476550	T	C	exonic	Spen	.	nonsynonymous SNV	Spen:NM_001347235:exon11:c.A4696G:p.S1566G,Spen:NM_019763:exon12:c.A4765G:p.S1589G	.	het	.	4	141476550	141476550	T	C	het	49.64	11
4	141476664	141476664	A	G	exonic	Spen	.	nonsynonymous SNV	Spen:NM_001347235:exon11:c.A4582C:p.I1528L,Spen:NM_019763:exon12:c.A4651C:p.I1551L	.	het	.	4	141476664	141476664	A	G	het	34.64	16
4	141476685	141476685	C	T	exonic	Spen	.	nonsynonymous SNV	Spen:NM_001347235:exon11:c.T4561A:p.S1521T,Spen:NM_019763:exon12:c.T4630A:p.S1544T	.	het	.	4	141476685	141476685	C	T	het	37.64	15
4	141476856	141476856	C	T	exonic	Spen	.	nonsynonymous SNV	Spen:NM_001347235:exon11:c.T4390A:p.F1464I,Spen:NM_019763:exon12:c.T4459A:p.F1487I	.	het	.	4	141476856	141476856	C	T	het	85.64	22
4	141477029	141477029	T	G	exonic	Spen	.	nonsynonymous SNV	Spen:NM_001347235:exon11:c.A4217C:p.Q1406P,Spen:NM_019763:exon12:c.A4286C:p.Q1429P	.	het	.	4	141477029	141477029	T	G	het	54.64	20
4	141477231	141477231	A	T	exonic	Spen	.	nonsynonymous SNV	Spen:NM_001347235:exon11:c.C4015A:p.Q1339K,Spen:NM_019763:exon12:c.C4084A:p.Q1362K	.	het	.	4	141477231	141477231	A	T	het	101.64	18
4	141478397	141478397	C	G	exonic	Spen	.	nonsynonymous SNV	Spen:NM_001347235:exon11:c.A2849C:p.E950A,Spen:NM_019763:exon12:c.A2918C:p.E973A	.	het	.	4	141478397	141478397	C	G	het	85.64	14
4	141478409	141478409	T	G	exonic	Spen	.	nonsynonymous SNV	Spen:NM_001347235:exon11:c.T2837C:p.V946A,Spen:NM_019763:exon12:c.T2906C:p.V969A	.	het	.	4	141478409	141478409	T	G	het	82.64	15
4	141478461	141478461	G	C	exonic	Spen	.	nonsynonymous SNV	Spen:NM_001347235:exon11:c.C2785G:p.P929A,Spen:NM_019763:exon12:c.C2854G:p.P952A	.	het	.	4	141478461	141478461	G	C	het	34.64	16
4	141479009	141479009	T	G	exonic	Spen	.	nonsynonymous SNV	Spen:NM_001347235:exon11:c.G2237C:p.R746T,Spen:NM_019763:exon12:c.G2306C:p.R769T	.	het	.	4	141479009	141479009	T	G	het	41.64	11
4	141479123	141479123	C	T	exonic	Spen	.	nonsynonymous SNV	Spen:NM_001347235:exon11:c.G2123A:p.R708Q,Spen:NM_019763:exon12:c.G2192A:p.R731Q	.	het	.	4	141479123	141479123	C	T	het	40.64	10
4	141479178	141479178	A	G	exonic	Spen	.	nonsynonymous SNV	Spen:NM_001347235:exon11:c.T2068C:p.Y690H,Spen:NM_019763:exon12:c.T2137C:p.Y713H	.	het	.	4	141479178	141479178	A	G	het	40.64	14
4	141479180	141479180	T	A	exonic	Spen	.	nonsynonymous SNV	Spen:NM_001347235:exon11:c.C2066T:p.P689L,Spen:NM_019763:exon12:c.C2135T:p.P712L	.	het	.	4	141479180	141479180	T	A	het	40.64	14
4	141479249	141479249	A	G	exonic	Spen	.	nonsynonymous SNV	Spen:NM_001347235:exon11:c.A1997C:p.Y666S,Spen:NM_019763:exon12:c.A2066C:p.Y689S	.	het	.	4	141479249	141479249	A	G	het	40.64	14
4	141479255	141479255	A	G	exonic	Spen	.	nonsynonymous SNV	Spen:NM_001347235:exon11:c.A1991C:p.E664A,Spen:NM_019763:exon12:c.A2060C:p.E687A	.	het	.	4	141479255	141479255	A	G	het	40.64	14
4	141489923	141489923	T	C	exonic	Spen	.	nonsynonymous SNV	Spen:NM_001347235:exon6:c.C1324G:p.L442V,Spen:NM_019763:exon6:c.C1324G:p.L442V	.	het	.	4	141489923	141489923	T	C	het	87.64	26
4	141764604	141764604	A	G	exonic	Dnajc16	.	nonsynonymous SNV	Dnajc16:NM_172338:exon14:c.T1907C:p.L636P	.	het	.	4	141764604	141764604	A	G	het	290.64	21
4	141764625	141764625	T	C	exonic	Dnajc16	.	nonsynonymous SNV	Dnajc16:NM_172338:exon14:c.A1886G:p.N629S	.	het	.	4	141764625	141764625	T	C	het	240.64	21
4	141770974	141770974	T	C	exonic	Dnajc16	.	nonsynonymous SNV	Dnajc16:NM_172338:exon8:c.T1081G:p.S361A	.	het	.	4	141770974	141770974	T	C	het	160.64	19
4	141775464	141775464	A	G	exonic	Dnajc16	.	nonsynonymous SNV	Dnajc16:NM_172338:exon6:c.A760C:p.N254H	.	het	.	4	141775464	141775464	A	G	het	185.64	23
4	141783079	141783079	G	A	exonic	Dnajc16	.	nonsynonymous SNV	Dnajc16:NM_172338:exon4:c.A262T:p.N88Y	.	het	.	4	141783079	141783079	G	A	het	140.64	17
4	141793901	141793901	G	A	exonic	Casp9	.	nonsynonymous SNV	Casp9:NM_001277932:exon1:c.T47A:p.L16Q,Casp9:NM_001355176:exon1:c.T47A:p.L16Q,Casp9:NM_015733:exon1:c.T47A:p.L16Q	.	het	.	4	141793901	141793901	G	A	het	94.64	11
4	141793907	141793907	G	C	exonic	Casp9	.	nonsynonymous SNV	Casp9:NM_001277932:exon1:c.G53C:p.S18T,Casp9:NM_001355176:exon1:c.G53C:p.S18T,Casp9:NM_015733:exon1:c.G53C:p.S18T	.	het	.	4	141793907	141793907	G	C	het	94.64	11
4	141796451	141796451	T	A	exonic	Casp9	.	nonsynonymous SNV	Casp9:NM_001277932:exon2:c.C149A:p.S50Y,Casp9:NM_001355176:exon2:c.C146A:p.S49Y,Casp9:NM_015733:exon2:c.C149A:p.S50Y	.	het	.	4	141796451	141796451	T	A	het	153.64	21
4	141796588	141796588	T	C	exonic	Casp9	.	nonsynonymous SNV	Casp9:NM_001277932:exon2:c.G286C:p.A96P,Casp9:NM_001355176:exon2:c.G283C:p.A95P,Casp9:NM_015733:exon2:c.G286C:p.A96P	.	het	.	4	141796588	141796588	T	C	het	79.64	31
4	141805897	141805897	T	C	exonic	Casp9	.	nonsynonymous SNV	Casp9:NM_001277932:exon5:c.T812C:p.V271A,Casp9:NM_001355176:exon5:c.T809C:p.V270A,Casp9:NM_015733:exon5:c.T812C:p.V271A	.	het	.	4	141805897	141805897	T	C	het	49.64	11
4	141811545	141811545	A	G	exonic	Casp9	.	nonsynonymous SNV	Casp9:NM_001277932:exon7:c.A989G:p.K330R,Casp9:NM_001355176:exon7:c.A986G:p.K329R,Casp9:NM_015733:exon7:c.A989G:p.K330R	.	het	.	4	141811545	141811545	A	G	het	76.64	13
4	141859798	141859798	T	G	exonic	Efhd2	.	nonsynonymous SNV	Efhd2:NM_025994:exon4:c.G672C:p.E224D	.	het	.	4	141859798	141859798	T	G	het	52.64	18
4	141860591	141860591	T	C	exonic	Efhd2	.	nonsynonymous SNV	Efhd2:NM_025994:exon3:c.C548G:p.S183C	.	het	.	4	141860591	141860591	T	C	het	75.64	13
4	141874604	141874604	A	G	exonic	Efhd2	.	nonsynonymous SNV	Efhd2:NM_025994:exon1:c.G264C:p.E88D	.	het	.	4	141874604	141874604	A	G	het	239.64	25
4	143811720	143811720	A	G	exonic	Pramel26	.	nonsynonymous SNV	Pramel26:NM_001005371:exon3:c.T680C:p.L227P,Pramel26:NM_001347257:exon3:c.T680C:p.L227P	.	het	.	4	143811720	143811720	A	G	het	85.64	14
4	143811733	143811733	C	T	exonic	Pramel26	.	nonsynonymous SNV	Pramel26:NM_001005371:exon3:c.G667A:p.E223K,Pramel26:NM_001347257:exon3:c.G667A:p.E223K	.	het	.	4	143811733	143811733	C	T	het	58.64	16
4	143811799	143811799	A	C	exonic	Pramel26	.	nonsynonymous SNV	Pramel26:NM_001005371:exon3:c.A601G:p.K201E,Pramel26:NM_001347257:exon3:c.A601G:p.K201E	.	het	.	4	143811799	143811799	A	C	het	212.64	16
4	143850713	143850713	T	A	exonic	Pramel27	.	nonsynonymous SNV	Pramel27:NM_177571:exon2:c.T64A:p.Y22N	.	het	.	4	143850713	143850713	T	A	het	52.64	10
4	143850764	143850764	0	A	exonic	Pramel27	.	nonsynonymous SNV	Pramel27:NM_177571:exon2:c.G115A:p.E39K	.	het	.	4	143850764	143850764	-	A	het	83.60	10
4	144209641	144209641	A	G	exonic	Pramel29	.	nonsynonymous SNV	Pramel29:NM_001177542:exon2:c.A42C:p.L14F	.	het	.	4	144209641	144209641	A	G	het	94.64	11
4	144273005	144273005	A	T	exonic	Pramel5	.	nonsynonymous SNV	Pramel5:NM_001085418:exon3:c.G511A:p.A171T	.	het	.	4	144273005	144273005	A	T	het	211.64	17
4	144273014	144273014	T	C	exonic	Pramel5	.	nonsynonymous SNV	Pramel5:NM_001085418:exon3:c.C502G:p.H168D	.	het	.	4	144273014	144273014	T	C	het	211.64	17
4	144273107	144273107	C	A	exonic	Pramel5	.	nonsynonymous SNV	Pramel5:NM_001085418:exon3:c.A409T:p.N137Y	.	het	.	4	144273107	144273107	C	A	het	57.64	19
4	144273181	144273181	T	C	exonic	Pramel5	.	nonsynonymous SNV	Pramel5:NM_001085418:exon3:c.T335G:p.F112C	.	het	.	4	144273181	144273181	T	C	het	92.64	21
4	144273944	144273944	A	G	exonic	Pramel5	.	nonsynonymous SNV	Pramel5:NM_001085418:exon2:c.G61C:p.E21Q	.	het	.	4	144273944	144273944	A	G	het	189.64	29
4	144456009	144456009	G	A	exonic	Aadacl3	.	nonsynonymous SNV	Aadacl3:NM_001085503:exon4:c.G888T:p.K296N	.	het	.	4	144456009	144456009	G	A	het	40.64	14
4	144456424	144456424	G	A	exonic	Aadacl3	.	nonsynonymous SNV	Aadacl3:NM_001085503:exon4:c.A473T:p.Y158F	.	het	.	4	144456424	144456424	G	A	het	130.64	14
4	144458007	144458007	G	C	exonic	Aadacl3	.	nonsynonymous SNV	Aadacl3:NM_001085503:exon2:c.T180G:p.I60M	.	het	.	4	144458007	144458007	G	C	het	80.64	13
4	144528485	144528485	A	G	exonic	Aadacl4fm1	.	nonsynonymous SNV	Aadacl4fm1:NM_198662:exon4:c.C474G:p.H158Q	.	het	.	4	144528485	144528485	A	G	het	113.64	17
4	144622734	144622734	T	G	exonic	Aadacl4	.	nonsynonymous SNV	Aadacl4:NM_001081248:exon4:c.T560G:p.V187G	.	het	.	4	144622734	144622734	T	G	het	262.64	30
4	144622884	144622884	A	G	exonic	Aadacl4	.	nonsynonymous SNV	Aadacl4:NM_001081248:exon4:c.A710G:p.Q237R	.	het	.	4	144622884	144622884	A	G	het	124.64	16
4	144622925	144622925	A	G	exonic	Aadacl4	.	nonsynonymous SNV	Aadacl4:NM_001081248:exon4:c.A751G:p.I251V	.	het	.	4	144622925	144622925	A	G	het	64.64	15
4	144623003	144623003	T	C	exonic	Aadacl4	.	nonsynonymous SNV	Aadacl4:NM_001081248:exon4:c.A829C:p.T277P	.	het	.	4	144623003	144623003	T	C	het	88.64	13
4	144623013	144623013	G	C	exonic	Aadacl4	.	nonsynonymous SNV	Aadacl4:NM_001081248:exon4:c.A839C:p.K280T	.	het	.	4	144623013	144623013	G	C	het	88.64	13
4	145122581	145122581	C	G	exonic	Vps13d	.	nonsynonymous SNV	Vps13d:NM_001276502:exon30:c.T7277C:p.V2426A,Vps13d:NM_001276465:exon31:c.T7277C:p.V2426A	.	het	.	4	145122581	145122581	C	G	het	40.64	14
4	145148636	145148636	A	G	exonic	Vps13d	.	nonsynonymous SNV	Vps13d:NM_001276502:exon20:c.A5318C:p.N1773T,Vps13d:NM_001276465:exon21:c.A5318C:p.N1773T	.	het	.	4	145148636	145148636	A	G	het	40.64	11
4	145148912	145148912	C	A	exonic	Vps13d	.	nonsynonymous SNV	Vps13d:NM_001276502:exon20:c.A5042T:p.N1681I,Vps13d:NM_001276465:exon21:c.A5042T:p.N1681I	.	het	.	4	145148912	145148912	C	A	het	69.64	15
4	145155237	145155237	G	T	exonic	Vps13d	.	nonsynonymous SNV	Vps13d:NM_001276502:exon18:c.T3785A:p.M1262K,Vps13d:NM_001276465:exon19:c.T3785A:p.M1262K	.	het	.	4	145155237	145155237	G	T	het	277.64	10
4	145155439	145155439	C	G	exonic	Vps13d	.	nonsynonymous SNV	Vps13d:NM_001276502:exon18:c.G3583C:p.A1195P,Vps13d:NM_001276465:exon19:c.G3583C:p.A1195P	.	het	.	4	145155439	145155439	C	G	het	232.64	10
4	145155452	145155452	G	T	exonic	Vps13d	.	nonsynonymous SNV	Vps13d:NM_001276502:exon18:c.T3570A:p.H1190Q,Vps13d:NM_001276465:exon19:c.T3570A:p.H1190Q	.	het	.	4	145155452	145155452	G	T	het	274.64	11
4	145155453	145155453	C	G	exonic	Vps13d	.	nonsynonymous SNV	Vps13d:NM_001276502:exon18:c.A3569C:p.H1190P,Vps13d:NM_001276465:exon19:c.A3569C:p.H1190P	.	het	.	4	145155453	145155453	C	G	het	274.64	11
4	145156234	145156234	C	T	exonic	Vps13d	.	nonsynonymous SNV	Vps13d:NM_001276502:exon18:c.G2788A:p.D930N,Vps13d:NM_001276465:exon19:c.G2788A:p.D930N	.	het	.	4	145156234	145156234	C	T	het	40.64	11
4	145156270	145156270	T	C	exonic	Vps13d	.	nonsynonymous SNV	Vps13d:NM_001276502:exon18:c.A2752G:p.I918V,Vps13d:NM_001276465:exon19:c.A2752G:p.I918V	.	het	.	4	145156270	145156270	T	C	het	352.64	15
4	145156298	145156298	G	A	exonic	Vps13d	.	nonsynonymous SNV	Vps13d:NM_001276502:exon18:c.G2724T:p.K908N,Vps13d:NM_001276465:exon19:c.G2724T:p.K908N	.	het	.	4	145156298	145156298	G	A	het	576.64	21
4	145156504	145156504	C	T	exonic	Vps13d	.	nonsynonymous SNV	Vps13d:NM_001276502:exon18:c.C2518A:p.Q840K,Vps13d:NM_001276465:exon19:c.C2518A:p.Q840K	.	het	.	4	145156504	145156504	C	T	het	276.64	25
4	145156516	145156516	T	C	exonic	Vps13d	.	nonsynonymous SNV	Vps13d:NM_001276502:exon18:c.T2506G:p.W836G,Vps13d:NM_001276465:exon19:c.T2506G:p.W836G	.	het	.	4	145156516	145156516	T	C	het	469.64	19
4	145156539	145156539	A	T	exonic	Vps13d	.	nonsynonymous SNV	Vps13d:NM_001276502:exon18:c.T2483A:p.M828K,Vps13d:NM_001276465:exon19:c.T2483A:p.M828K	.	het	.	4	145156539	145156539	A	T	het	38.64	18
4	145156549	145156549	A	T	exonic	Vps13d	.	nonsynonymous SNV	Vps13d:NM_001276502:exon18:c.C2473A:p.L825I,Vps13d:NM_001276465:exon19:c.C2473A:p.L825I	.	het	.	4	145156549	145156549	A	T	het	79.64	16
4	145156551	145156551	A	G	exonic	Vps13d	.	nonsynonymous SNV	Vps13d:NM_001276502:exon18:c.A2471C:p.D824A,Vps13d:NM_001276465:exon19:c.A2471C:p.D824A	.	het	.	4	145156551	145156551	A	G	het	574.64	16
4	145156567	145156567	A	G	exonic	Vps13d	.	nonsynonymous SNV	Vps13d:NM_001276502:exon18:c.T2455C:p.S819P,Vps13d:NM_001276465:exon19:c.T2455C:p.S819P	.	het	.	4	145156567	145156567	A	G	het	574.64	16
4	145156579	145156579	G	T	exonic	Vps13d	.	nonsynonymous SNV	Vps13d:NM_001276502:exon18:c.T2443A:p.Y815N,Vps13d:NM_001276465:exon19:c.T2443A:p.Y815N	.	het	.	4	145156579	145156579	G	T	het	259.64	16
4	145156590	145156590	G	A	exonic	Vps13d	.	nonsynonymous SNV	Vps13d:NM_001276502:exon18:c.G2432T:p.S811I,Vps13d:NM_001276465:exon19:c.G2432T:p.S811I	.	het	.	4	145156590	145156590	G	A	het	37.64	15
4	145156672	145156672	T	C	exonic	Vps13d	.	nonsynonymous SNV	Vps13d:NM_001276502:exon18:c.A2350G:p.T784A,Vps13d:NM_001276465:exon19:c.A2350G:p.T784A	.	het	.	4	145156672	145156672	T	C	het	271.64	12
4	145160585	145160585	A	G	exonic	Vps13d	.	nonsynonymous SNV	Vps13d:NM_001276502:exon17:c.G2239C:p.E747Q,Vps13d:NM_001276465:exon18:c.G2239C:p.E747Q	.	het	.	4	145160585	145160585	A	G	het	485.64	23
4	145163307	145163307	A	C	exonic	Vps13d	.	nonsynonymous SNV	Vps13d:NM_001276502:exon15:c.A1844G:p.E615G,Vps13d:NM_001276465:exon16:c.A1844G:p.E615G	.	het	.	4	145163307	145163307	A	C	het	305.64	14
4	145167418	145167418	A	C	exonic	Vps13d	.	nonsynonymous SNV	Vps13d:NM_001276502:exon12:c.A1570G:p.S524G,Vps13d:NM_001276465:exon13:c.A1570G:p.S524G	.	het	.	4	145167418	145167418	A	C	het	309.64	13
4	145167424	145167424	T	A	exonic	Vps13d	.	nonsynonymous SNV	Vps13d:NM_001276502:exon12:c.A1564T:p.N522Y,Vps13d:NM_001276465:exon13:c.A1564T:p.N522Y	.	het	.	4	145167424	145167424	T	A	het	303.64	12
4	145167520	145167520	C	T	exonic	Vps13d	.	nonsynonymous SNV	Vps13d:NM_001276502:exon12:c.T1468A:p.Y490N,Vps13d:NM_001276465:exon13:c.T1468A:p.Y490N	.	het	.	4	145167520	145167520	C	T	het	678.64	32
4	145167523	145167523	T	C	exonic	Vps13d	.	nonsynonymous SNV	Vps13d:NM_001276502:exon12:c.A1465G:p.T489A,Vps13d:NM_001276465:exon13:c.A1465G:p.T489A	.	het	.	4	145167523	145167523	T	C	het	401.64	32
4	145168122	145168122	G	C	exonic	Vps13d	.	nonsynonymous SNV	Vps13d:NM_001276502:exon11:c.A1411G:p.I471V,Vps13d:NM_001276465:exon12:c.A1411G:p.I471V	.	het	.	4	145168122	145168122	G	C	het	178.64	13
4	145168210	145168210	C	A	exonic	Vps13d	.	nonsynonymous SNV	Vps13d:NM_001276502:exon11:c.G1323T:p.W441C,Vps13d:NM_001276465:exon12:c.G1323T:p.W441C	.	het	.	4	145168210	145168210	C	A	het	216.64	15
4	145168270	145168270	G	C	exonic	Vps13d	.	nonsynonymous SNV	Vps13d:NM_001276502:exon11:c.T1263G:p.D421E,Vps13d:NM_001276465:exon12:c.T1263G:p.D421E	.	het	.	4	145168270	145168270	G	C	het	521.64	17
4	145168481	145168481	C	T	exonic	Vps13d	.	nonsynonymous SNV	Vps13d:NM_001276502:exon10:c.G1210A:p.A404T,Vps13d:NM_001276465:exon11:c.G1210A:p.A404T	.	het	.	4	145168481	145168481	C	T	het	470.64	19
4	145168493	145168493	A	T	exonic	Vps13d	.	nonsynonymous SNV	Vps13d:NM_001276502:exon10:c.C1198A:p.Q400K,Vps13d:NM_001276465:exon11:c.C1198A:p.Q400K	.	het	.	4	145168493	145168493	A	T	het	48.64	22
4	145168518	145168518	T	A	exonic	Vps13d	.	nonsynonymous SNV	Vps13d:NM_001276502:exon10:c.A1173T:p.E391D,Vps13d:NM_001276465:exon11:c.A1173T:p.E391D	.	het	.	4	145168518	145168518	T	A	het	60.64	24
4	145168544	145168544	G	C	exonic	Vps13d	.	nonsynonymous SNV	Vps13d:NM_001276502:exon10:c.T1147G:p.F383V,Vps13d:NM_001276465:exon11:c.T1147G:p.F383V	.	het	.	4	145168544	145168544	G	C	het	164.64	23
4	145168547	145168547	G	C	exonic	Vps13d	.	nonsynonymous SNV	Vps13d:NM_001276502:exon10:c.A1144G:p.S382G,Vps13d:NM_001276465:exon11:c.A1144G:p.S382G	.	het	.	4	145168547	145168547	G	C	het	295.64	24
4	145170284	145170284	T	C	exonic	Vps13d	.	nonsynonymous SNV	Vps13d:NM_001276502:exon9:c.C1065G:p.D355E,Vps13d:NM_001276465:exon10:c.C1065G:p.D355E	.	het	.	4	145170284	145170284	T	C	het	199.64	25
4	145170293	145170293	T	C	exonic	Vps13d	.	nonsynonymous SNV	Vps13d:NM_001276502:exon9:c.T1056G:p.F352L,Vps13d:NM_001276465:exon10:c.T1056G:p.F352L	.	het	.	4	145170293	145170293	T	C	het	232.64	25
4	145170328	145170328	T	A	exonic	Vps13d	.	nonsynonymous SNV	Vps13d:NM_001276502:exon9:c.G1021T:p.D341Y,Vps13d:NM_001276465:exon10:c.G1021T:p.D341Y	.	het	.	4	145170328	145170328	T	A	het	22.64	20
4	145170340	145170340	T	C	exonic	Vps13d	.	nonsynonymous SNV	Vps13d:NM_001276502:exon9:c.T1009G:p.C337G,Vps13d:NM_001276465:exon10:c.T1009G:p.C337G	.	het	.	4	145170340	145170340	T	C	het	438.64	20
4	145171666	145171666	T	A	exonic	Vps13d	.	nonsynonymous SNV	Vps13d:NM_001276502:exon8:c.C923T:p.P308L,Vps13d:NM_001276465:exon9:c.C923T:p.P308L	.	het	.	4	145171666	145171666	T	A	het	699.64	28
4	145172086	145172086	T	C	exonic	Vps13d	.	nonsynonymous SNV	Vps13d:NM_001276502:exon7:c.C835G:p.L279V,Vps13d:NM_001276465:exon8:c.C835G:p.L279V	.	het	.	4	145172086	145172086	T	C	het	59.64	17
4	145172087	145172087	A	G	exonic	Vps13d	.	nonsynonymous SNV	Vps13d:NM_001276502:exon7:c.G834C:p.K278N,Vps13d:NM_001276465:exon8:c.G834C:p.K278N	.	het	.	4	145172087	145172087	A	G	het	510.64	17
4	145172189	145172189	A	C	exonic	Vps13d	.	nonsynonymous SNV	Vps13d:NM_001276502:exon7:c.C732G:p.C244W,Vps13d:NM_001276465:exon8:c.C732G:p.C244W	.	het	.	4	145172189	145172189	A	C	het	63.64	17
4	145172228	145172228	A	G	exonic	Vps13d	.	nonsynonymous SNV	Vps13d:NM_001276502:exon7:c.G693C:p.M231I,Vps13d:NM_001276465:exon8:c.G693C:p.M231I	.	het	.	4	145172228	145172228	A	G	het	86.64	20
4	145173062	145173062	C	G	exonic	Vps13d	.	nonsynonymous SNV	Vps13d:NM_001276502:exon6:c.G664C:p.E222Q,Vps13d:NM_001276465:exon7:c.G664C:p.E222Q	.	het	.	4	145173062	145173062	C	G	het	845.64	32
4	145173118	145173118	T	C	exonic	Vps13d	.	nonsynonymous SNV	Vps13d:NM_001276502:exon6:c.A608G:p.E203G,Vps13d:NM_001276465:exon7:c.A608G:p.E203G	.	het	.	4	145173118	145173118	T	C	het	541.64	28
4	145173139	145173139	C	A	exonic	Vps13d	.	nonsynonymous SNV	Vps13d:NM_001276502:exon6:c.A587T:p.K196M,Vps13d:NM_001276465:exon7:c.A587T:p.K196M	.	het	.	4	145173139	145173139	C	A	het	935.64	26
4	145173145	145173145	T	C	exonic	Vps13d	.	nonsynonymous SNV	Vps13d:NM_001276502:exon6:c.T581G:p.M194R,Vps13d:NM_001276465:exon7:c.T581G:p.M194R	.	het	.	4	145173145	145173145	T	C	het	898.64	25
4	145190541	145190541	A	G	exonic	Vps13d	.	nonsynonymous SNV	Vps13d:NM_001276502:exon1:c.G52C:p.V18L,Vps13d:NM_001276465:exon2:c.G52C:p.V18L	.	het	.	4	145190541	145190541	A	G	het	129.64	16
4	145190561	145190561	C	G	exonic	Vps13d	.	nonsynonymous SNV	Vps13d:NM_001276502:exon1:c.A32C:p.N11T,Vps13d:NM_001276465:exon2:c.A32C:p.N11T	.	het	.	4	145190561	145190561	C	G	het	170.64	16
4	145190589	145190589	G	T	exonic	Vps13d	.	nonsynonymous SNV	Vps13d:NM_001276502:exon1:c.T4A:p.L2M,Vps13d:NM_001276465:exon2:c.T4A:p.L2M	.	het	.	4	145190589	145190589	G	T	het	164.64	18
4	147512956	147512956	G	T	exonic	Zfp982	.	nonsynonymous SNV	Zfp982:NM_001039209:exon3:c.C769T:p.L257F,Zfp982:NM_001365422:exon4:c.C769T:p.L257F,Zfp982:NM_001371349:exon4:c.C769T:p.L257F,Zfp982:NM_001371348:exon5:c.C769T:p.L257F	.	het	.	4	147512956	147512956	G	T	het	265.67	10
4	147583304	147583304	T	G	exonic	Zfp985	.	nonsynonymous SNV	Zfp985:NM_001014397:exon6:c.T628G:p.Y210D	.	het	.	4	147583304	147583304	T	G	het	1159.10	28
4	147583304	147583304	T	A	exonic	Zfp985	.	nonsynonymous SNV	Zfp985:NM_001014397:exon6:c.T628A:p.Y210N	.	het	.	4	147583304	147583304	T	A	het	1159.10	28
4	147583710	147583710	0	G	exonic	Zfp985	.	nonsynonymous SNV	Zfp985:NM_001014397:exon6:c.C1034G:p.T345S	.	het	.	4	147583710	147583710	-	G	het	217.60	15
4	147613079	147613079	T	C	exonic	Zfp979	.	nonsynonymous SNV	Zfp979:NM_145078:exon5:c.A1172G:p.H391R	.	het	.	4	147613079	147613079	T	C	het	620.64	23
4	147613214	147613214	C	A	exonic	Zfp979	.	nonsynonymous SNV	Zfp979:NM_145078:exon5:c.G1037T:p.C346F	.	het	.	4	147613214	147613214	C	A	het	485.64	21
4	147613246	147613246	T	C	exonic	Zfp979	.	nonsynonymous SNV	Zfp979:NM_145078:exon5:c.T1005G:p.H335Q	.	het	.	4	147613246	147613246	T	C	het	538.64	26
4	147613259	147613259	T	C	exonic	Zfp979	.	nonsynonymous SNV	Zfp979:NM_145078:exon5:c.A992G:p.H331R	.	het	.	4	147613259	147613259	T	C	het	724.64	26
4	147613325	147613325	G	T	exonic	Zfp979	.	nonsynonymous SNV	Zfp979:NM_145078:exon5:c.G926A:p.G309E	.	het	.	4	147613325	147613325	G	T	het	436.64	18
4	147613364	147613364	C	A	exonic	Zfp979	.	nonsynonymous SNV	Zfp979:NM_145078:exon5:c.A887T:p.Q296L	.	het	.	4	147613364	147613364	C	A	het	476.64	17
4	147613491	147613491	G	T	exonic	Zfp979	.	nonsynonymous SNV	Zfp979:NM_145078:exon5:c.G760A:p.E254K	.	het	.	4	147613491	147613491	G	T	het	67.64	20
4	147613493	147613493	A	T	exonic	Zfp979	.	nonsynonymous SNV	Zfp979:NM_145078:exon5:c.G758A:p.G253E	.	het	.	4	147613493	147613493	A	T	het	347.04	20
4	147613500	147613500	G	T	exonic	Zfp979	.	nonsynonymous SNV	Zfp979:NM_145078:exon5:c.C751A:p.H251N	.	het	.	4	147613500	147613500	G	T	het	373.64	19
4	147613568	147613568	G	T	exonic	Zfp979	.	nonsynonymous SNV	Zfp979:NM_145078:exon5:c.C683A:p.S228Y	.	het	.	4	147613568	147613568	G	T	het	71.64	16
4	147613627	147613627	G	A	exonic	Zfp979	.	nonsynonymous SNV	Zfp979:NM_145078:exon5:c.A624T:p.K208N	.	het	.	4	147613627	147613627	G	A	het	130.64	14
4	147613633	147613633	T	C	exonic	Zfp979	.	nonsynonymous SNV	Zfp979:NM_145078:exon5:c.T618G:p.F206L	.	het	.	4	147613633	147613633	T	C	het	69.64	15
4	147613634	147613634	A	G	exonic	Zfp979	.	nonsynonymous SNV	Zfp979:NM_145078:exon5:c.T617C:p.F206S	.	het	.	4	147613634	147613634	A	G	het	217.64	15
4	147613635	147613635	A	G	exonic	Zfp979	.	nonsynonymous SNV	Zfp979:NM_145078:exon5:c.T616C:p.F206L	.	het	.	4	147613635	147613635	A	G	het	217.64	15
4	147613664	147613664	A	T	exonic	Zfp979	.	nonsynonymous SNV	Zfp979:NM_145078:exon5:c.G587A:p.S196N	.	het	.	4	147613664	147613664	A	T	het	145.64	17
4	147613748	147613748	G	C	exonic	Zfp979	.	nonsynonymous SNV	Zfp979:NM_145078:exon5:c.T503G:p.I168R	.	het	.	4	147613748	147613748	G	C	het	259.64	13
4	147613904	147613904	G	T	exonic	Zfp979	.	nonsynonymous SNV	Zfp979:NM_145078:exon5:c.G347A:p.S116N	.	het	.	4	147613904	147613904	G	T	het	347.64	14
4	147828738	147828738	A	C	exonic	Zfp933	.	nonsynonymous SNV	Zfp933:NM_198619:exon2:c.T62G:p.L21W	.	het	.	4	147828738	147828738	A	C	het	263.64	12
4	147878759	147878759	C	T	exonic	Mfn2	.	nonsynonymous SNV	Mfn2:NM_001285922:exon17:c.T2024A:p.L675H,Mfn2:NM_001285923:exon17:c.T2024A:p.L675H,Mfn2:NM_001355590:exon17:c.T2024A:p.L675H,Mfn2:NM_001355591:exon17:c.T2024A:p.L675H,Mfn2:NM_133201:exon17:c.T2024A:p.L675H,Mfn2:NM_001285920:exon18:c.T2024A:p.L675H,Mfn2:NM_001285921:exon18:c.T2024A:p.L675H	.	het	.	4	147878759	147878759	C	T	het	103.64	11
4	147878827	147878827	T	A	exonic	Mfn2	.	nonsynonymous SNV	Mfn2:NM_001285922:exon17:c.G1956T:p.W652C,Mfn2:NM_001285923:exon17:c.G1956T:p.W652C,Mfn2:NM_001355590:exon17:c.G1956T:p.W652C,Mfn2:NM_001355591:exon17:c.G1956T:p.W652C,Mfn2:NM_133201:exon17:c.G1956T:p.W652C,Mfn2:NM_001285920:exon18:c.G1956T:p.W652C,Mfn2:NM_001285921:exon18:c.G1956T:p.W652C	.	het	.	4	147878827	147878827	T	A	het	62.64	12
4	147882953	147882953	C	T	exonic	Mfn2	.	nonsynonymous SNV	Mfn2:NM_001285922:exon14:c.G1423A:p.G475S,Mfn2:NM_001285923:exon14:c.G1423A:p.G475S,Mfn2:NM_001355590:exon14:c.G1423A:p.G475S,Mfn2:NM_001355591:exon14:c.G1423A:p.G475S,Mfn2:NM_133201:exon14:c.G1423A:p.G475S,Mfn2:NM_001285920:exon15:c.G1423A:p.G475S,Mfn2:NM_001285921:exon15:c.G1423A:p.G475S	.	het	.	4	147882953	147882953	C	T	het	71.64	10
4	147885454	147885454	T	C	exonic	Mfn2	.	nonsynonymous SNV	Mfn2:NM_001285922:exon11:c.C1159G:p.R387G,Mfn2:NM_001285923:exon11:c.C1159G:p.R387G,Mfn2:NM_001355590:exon11:c.C1159G:p.R387G,Mfn2:NM_001355591:exon11:c.C1159G:p.R387G,Mfn2:NM_133201:exon11:c.C1159G:p.R387G,Mfn2:NM_001285920:exon12:c.C1159G:p.R387G,Mfn2:NM_001285921:exon12:c.C1159G:p.R387G	.	het	.	4	147885454	147885454	T	C	het	45.64	22
4	147887299	147887299	G	C	exonic	Mfn2	.	nonsynonymous SNV	Mfn2:NM_001285922:exon8:c.C723G:p.F241L,Mfn2:NM_001285923:exon8:c.C723G:p.F241L,Mfn2:NM_001355590:exon8:c.C723G:p.F241L,Mfn2:NM_001355591:exon8:c.C723G:p.F241L,Mfn2:NM_133201:exon8:c.C723G:p.F241L,Mfn2:NM_001285920:exon9:c.C723G:p.F241L,Mfn2:NM_001285921:exon9:c.C723G:p.F241L	.	het	.	4	147887299	147887299	G	C	het	252.64	22
4	147887311	147887311	T	A	exonic	Mfn2	.	nonsynonymous SNV	Mfn2:NM_001285922:exon8:c.G711T:p.E237D,Mfn2:NM_001285923:exon8:c.G711T:p.E237D,Mfn2:NM_001355590:exon8:c.G711T:p.E237D,Mfn2:NM_001355591:exon8:c.G711T:p.E237D,Mfn2:NM_133201:exon8:c.G711T:p.E237D,Mfn2:NM_001285920:exon9:c.G711T:p.E237D,Mfn2:NM_001285921:exon9:c.G711T:p.E237D	.	het	.	4	147887311	147887311	T	A	het	154.64	21
4	147888648	147888648	A	T	exonic	Mfn2	.	nonsynonymous SNV	Mfn2:NM_001285922:exon6:c.C571A:p.L191M,Mfn2:NM_001285923:exon6:c.C571A:p.L191M,Mfn2:NM_001355590:exon6:c.C571A:p.L191M,Mfn2:NM_001355591:exon6:c.C571A:p.L191M,Mfn2:NM_133201:exon6:c.C571A:p.L191M,Mfn2:NM_001285920:exon7:c.C571A:p.L191M,Mfn2:NM_001285921:exon7:c.C571A:p.L191M	.	het	.	4	147888648	147888648	A	T	het	52.64	10
4	147888666	147888666	G	C	exonic	Mfn2	.	nonsynonymous SNV	Mfn2:NM_001285922:exon6:c.A553G:p.N185D,Mfn2:NM_001285923:exon6:c.A553G:p.N185D,Mfn2:NM_001355590:exon6:c.A553G:p.N185D,Mfn2:NM_001355591:exon6:c.A553G:p.N185D,Mfn2:NM_133201:exon6:c.A553G:p.N185D,Mfn2:NM_001285920:exon7:c.A553G:p.N185D,Mfn2:NM_001285921:exon7:c.A553G:p.N185D	.	het	.	4	147888666	147888666	G	C	het	52.64	10
4	147888697	147888697	G	C	exonic	Mfn2	.	nonsynonymous SNV	Mfn2:NM_001285922:exon6:c.T522G:p.H174Q,Mfn2:NM_001285923:exon6:c.T522G:p.H174Q,Mfn2:NM_001355590:exon6:c.T522G:p.H174Q,Mfn2:NM_001355591:exon6:c.T522G:p.H174Q,Mfn2:NM_133201:exon6:c.T522G:p.H174Q,Mfn2:NM_001285920:exon7:c.T522G:p.H174Q,Mfn2:NM_001285921:exon7:c.T522G:p.H174Q	.	het	.	4	147888697	147888697	G	C	het	76.64	10
4	147894600	147894600	A	C	exonic	Mfn2	.	nonsynonymous SNV	Mfn2:NM_001285922:exon4:c.C274G:p.L92V,Mfn2:NM_001285923:exon4:c.C274G:p.L92V,Mfn2:NM_001355590:exon4:c.C274G:p.L92V,Mfn2:NM_001355591:exon4:c.C274G:p.L92V,Mfn2:NM_133201:exon4:c.C274G:p.L92V,Mfn2:NM_001285920:exon5:c.C274G:p.L92V,Mfn2:NM_001285921:exon5:c.C274G:p.L92V	.	het	.	4	147894600	147894600	A	C	het	352.64	15
4	147945420	147945420	T	A	exonic	2510039O18Rik	.	nonsynonymous SNV	2510039O18Rik:NM_029841:exon2:c.G1846A:p.E616K	.	het	.	4	147945420	147945420	T	A	het	23.64	14
4	148008708	148008708	G	T	exonic	Clcn6	.	nonsynonymous SNV	Clcn6:NM_011929:exon22:c.C2505A:p.H835Q	.	het	.	4	148008708	148008708	G	T	het	214.64	16
4	148008737	148008737	T	C	exonic	Clcn6	.	nonsynonymous SNV	Clcn6:NM_011929:exon22:c.A2476G:p.N826D	.	het	.	4	148008737	148008737	T	C	het	253.64	18
4	148010759	148010759	A	G	exonic	Clcn6	.	nonsynonymous SNV	Clcn6:NM_011929:exon20:c.G2193C:p.W731C	.	het	.	4	148010759	148010759	A	G	het	54.64	28
4	148010977	148010977	G	A	exonic	Clcn6	.	nonsynonymous SNV	Clcn6:NM_011929:exon19:c.G2136T:p.E712D	.	het	.	4	148010977	148010977	G	A	het	76.64	17
4	148011002	148011002	A	G	exonic	Clcn6	.	nonsynonymous SNV	Clcn6:NM_011929:exon19:c.A2111C:p.E704A	.	het	.	4	148011002	148011002	A	G	het	101.64	17
4	148011027	148011027	G	T	exonic	Clcn6	.	nonsynonymous SNV	Clcn6:NM_011929:exon19:c.G2086A:p.A696T	.	het	.	4	148011027	148011027	G	T	het	74.64	18
4	148011068	148011068	T	C	exonic	Clcn6	.	nonsynonymous SNV	Clcn6:NM_011929:exon19:c.A2045G:p.Y682C	.	het	.	4	148011068	148011068	T	C	het	82.64	15
4	148011069	148011069	A	G	exonic	Clcn6	.	nonsynonymous SNV	Clcn6:NM_011929:exon19:c.T2044C:p.Y682H	.	het	.	4	148011069	148011069	A	G	het	85.64	14
4	148011107	148011107	A	C	exonic	Clcn6	.	nonsynonymous SNV	Clcn6:NM_011929:exon19:c.C2006G:p.A669G	.	het	.	4	148011107	148011107	A	C	het	74.64	16
4	148016906	148016906	G	A	exonic	Clcn6	.	nonsynonymous SNV	Clcn6:NM_011929:exon13:c.A1194T:p.E398D	.	het	.	4	148016906	148016906	G	A	het	118.64	33
4	148016958	148016958	C	T	exonic	Clcn6	.	nonsynonymous SNV	Clcn6:NM_011929:exon13:c.T1142A:p.V381E	.	het	.	4	148016958	148016958	C	T	het	64.64	36
4	148017931	148017931	C	A	exonic	Clcn6	.	nonsynonymous SNV	Clcn6:NM_011929:exon11:c.C926T:p.P309L	.	het	.	4	148017931	148017931	C	A	het	276.64	44
4	148026566	148026566	C	T	exonic	Clcn6	.	nonsynonymous SNV	Clcn6:NM_011929:exon5:c.T313A:p.F105I	.	het	.	4	148026566	148026566	C	T	het	198.64	13
4	148051376	148051376	A	G	exonic	Mthfr	.	nonsynonymous SNV	Mthfr:NM_001161798:exon6:c.A905G:p.Y302C,Mthfr:NM_010840:exon6:c.A782G:p.Y261C	.	het	.	4	148051376	148051376	A	G	het	226.64	20
4	148051525	148051525	T	G	exonic	Mthfr	.	nonsynonymous SNV	Mthfr:NM_001161798:exon6:c.A1054G:p.S352G,Mthfr:NM_010840:exon6:c.A931G:p.S311G	.	het	.	4	148051525	148051525	T	G	het	81.64	11
4	148052581	148052581	G	A	exonic	Mthfr	.	nonsynonymous SNV	Mthfr:NM_001161798:exon9:c.T1535A:p.L512H,Mthfr:NM_010840:exon9:c.T1412A:p.L471H	.	het	.	4	148052581	148052581	G	A	het	46.64	12
4	148107998	148107998	C	T	exonic	Draxin	.	nonsynonymous SNV	Draxin:NM_027426:exon6:c.C856A:p.L286I	.	het	.	4	148107998	148107998	C	T	het	187.64	10
4	148115735	148115735	G	A	exonic	Draxin	.	nonsynonymous SNV	Draxin:NM_027426:exon2:c.A257T:p.Q86L	.	het	.	4	148115735	148115735	G	A	het	89.64	10
4	148145992	148145992	G	A	exonic	Fbxo6	.	nonsynonymous SNV	Fbxo6:NM_001163704:exon6:c.G812T:p.R271M,Fbxo6:NM_001163705:exon6:c.G812T:p.R271M,Fbxo6:NM_001163706:exon6:c.G812T:p.R271M,Fbxo6:NM_001163707:exon6:c.G812T:p.R271M,Fbxo6:NM_015797:exon6:c.G812T:p.R271M	.	het	.	4	148145992	148145992	G	A	het	137.64	24
4	148146178	148146178	T	C	exonic	Fbxo6	.	nonsynonymous SNV	Fbxo6:NM_001163704:exon6:c.A626G:p.H209R,Fbxo6:NM_001163705:exon6:c.A626G:p.H209R,Fbxo6:NM_001163706:exon6:c.A626G:p.H209R,Fbxo6:NM_001163707:exon6:c.A626G:p.H209R,Fbxo6:NM_015797:exon6:c.A626G:p.H209R	.	het	.	4	148146178	148146178	T	C	het	165.64	14
4	148146343	148146343	G	A	exonic	Fbxo6	.	nonsynonymous SNV	Fbxo6:NM_001163704:exon5:c.G596T:p.W199L,Fbxo6:NM_001163705:exon5:c.G596T:p.W199L,Fbxo6:NM_001163706:exon5:c.G596T:p.W199L,Fbxo6:NM_001163707:exon5:c.G596T:p.W199L,Fbxo6:NM_015797:exon5:c.G596T:p.W199L	.	het	.	4	148146343	148146343	G	A	het	115.64	19
4	148146352	148146352	G	C	exonic	Fbxo6	.	nonsynonymous SNV	Fbxo6:NM_001163704:exon5:c.T587G:p.F196C,Fbxo6:NM_001163705:exon5:c.T587G:p.F196C,Fbxo6:NM_001163706:exon5:c.T587G:p.F196C,Fbxo6:NM_001163707:exon5:c.T587G:p.F196C,Fbxo6:NM_015797:exon5:c.T587G:p.F196C	.	het	.	4	148146352	148146352	G	C	het	121.64	17
4	148146424	148146424	A	G	exonic	Fbxo6	.	nonsynonymous SNV	Fbxo6:NM_001163704:exon5:c.A515C:p.Y172S,Fbxo6:NM_001163705:exon5:c.A515C:p.Y172S,Fbxo6:NM_001163706:exon5:c.A515C:p.Y172S,Fbxo6:NM_001163707:exon5:c.A515C:p.Y172S,Fbxo6:NM_015797:exon5:c.A515C:p.Y172S	.	het	.	4	148146424	148146424	A	G	het	181.64	12
4	148146427	148146427	T	C	exonic	Fbxo6	.	nonsynonymous SNV	Fbxo6:NM_001163704:exon5:c.C512G:p.T171S,Fbxo6:NM_001163705:exon5:c.C512G:p.T171S,Fbxo6:NM_001163706:exon5:c.C512G:p.T171S,Fbxo6:NM_001163707:exon5:c.C512G:p.T171S,Fbxo6:NM_015797:exon5:c.C512G:p.T171S	.	het	.	4	148146427	148146427	T	C	het	181.64	12
4	148146861	148146861	C	T	exonic	Fbxo6	.	nonsynonymous SNV	Fbxo6:NM_001163704:exon4:c.C461A:p.P154H,Fbxo6:NM_001163705:exon4:c.C461A:p.P154H,Fbxo6:NM_001163706:exon4:c.C461A:p.P154H,Fbxo6:NM_001163707:exon4:c.C461A:p.P154H,Fbxo6:NM_015797:exon4:c.C461A:p.P154H	.	het	.	4	148146861	148146861	C	T	het	215.64	19
4	148156631	148156631	C	T	exonic	Fbxo44	.	nonsynonymous SNV	Fbxo44:NM_001161851:exon3:c.G341A:p.R114Q,Fbxo44:NM_001161852:exon3:c.G341A:p.R114Q,Fbxo44:NM_001355701:exon3:c.G341A:p.R114Q,Fbxo44:NM_173401:exon3:c.G341A:p.R114Q,Fbxo44:NM_001355702:exon4:c.G113A:p.R38Q	.	het	.	4	148156631	148156631	C	T	het	29.64	18
4	148156698	148156698	C	T	exonic	Fbxo44	.	nonsynonymous SNV	Fbxo44:NM_001161851:exon3:c.G274A:p.E92K,Fbxo44:NM_001161852:exon3:c.G274A:p.E92K,Fbxo44:NM_001355701:exon3:c.G274A:p.E92K,Fbxo44:NM_173401:exon3:c.G274A:p.E92K,Fbxo44:NM_001355702:exon4:c.G46A:p.E16K	.	het	.	4	148156698	148156698	C	T	het	122.64	22
4	148164326	148164326	T	C	exonic	Fbxo2	.	nonsynonymous SNV	Fbxo2:NM_176848:exon2:c.T274C:p.W92R	.	het	.	4	148164326	148164326	T	C	het	56.64	33
4	148164377	148164377	T	C	exonic	Fbxo2	.	nonsynonymous SNV	Fbxo2:NM_176848:exon2:c.G325C:p.E109Q	.	het	.	4	148164377	148164377	T	C	het	102.64	33
4	148250776	148250776	C	T	exonic	Disp3	.	nonsynonymous SNV	Disp3:NM_001083342:exon15:c.T2810A:p.I937N	.	het	.	4	148250776	148250776	C	T	het	47.64	24
4	148257844	148257844	T	G	exonic	Disp3	.	nonsynonymous SNV	Disp3:NM_001083342:exon9:c.A1970C:p.D657A	.	het	.	4	148257844	148257844	T	G	het	166.64	21
4	148258723	148258723	G	T	exonic	Disp3	.	nonsynonymous SNV	Disp3:NM_001083342:exon7:c.C1730A:p.P577H	.	het	.	4	148258723	148258723	G	T	het	129.64	21
4	148259843	148259843	A	G	exonic	Disp3	.	nonsynonymous SNV	Disp3:NM_001083342:exon6:c.A1601C:p.N534T	.	het	.	4	148259843	148259843	A	G	het	133.64	18
4	148260482	148260482	A	C	exonic	Disp3	.	nonsynonymous SNV	Disp3:NM_001083342:exon5:c.T1451G:p.I484S	.	het	.	4	148260482	148260482	A	C	het	104.64	20
4	148270477	148270477	T	C	exonic	Disp3	.	nonsynonymous SNV	Disp3:NM_001083342:exon3:c.C1081G:p.P361A	.	het	.	4	148270477	148270477	T	C	het	216.64	20
4	148270545	148270545	T	C	exonic	Disp3	.	nonsynonymous SNV	Disp3:NM_001083342:exon3:c.A1013G:p.E338G	.	het	.	4	148270545	148270545	T	C	het	264.64	18
4	148271483	148271483	T	C	exonic	Disp3	.	nonsynonymous SNV	Disp3:NM_001083342:exon2:c.A919G:p.I307V	.	het	.	4	148271483	148271483	T	C	het	256.64	17
[truncated: 4,729 more rows]
