# Supplementary material for: Shock-Scattering Micro-Histotripsy-Aided Fine Needle Aspiration for Enhanced Biomarker Profiling and Cytopathology
Source: Research Square preprint supplement (doi:10.21203/rs.3.rs-5939271/v1), 2025-04-23
Supplement: Supplementary file 7 [file Supplementary 3 - histotripsy.mm10_exonic_non-synonymous.xlsx]

## Sheet: Sheet1
Chr	Start	End	Ref	Alt	Func.refGene	Gene.refGene	GeneDetail.refGene	ExonicFunction.refGene	AAChange.refGene	otherInfo1	otherInfo2	otherInfo3	otherInfo4	otherInfo5	otherInfo6	otherInfo7	otherInfo8	otherInfo9	otherInfo10	otherInfo11
1	4228529	4228529	A	T	exonic	Rp1	.	nonsynonymous SNV	Rp1:NM_001370921:exon14:c.C1909A:p.L637M	.	het	.	1	4228529	4228529	A	T	het	94.64	26
1	4243145	4243145	G	A	exonic	Rp1	.	nonsynonymous SNV	Rp1:NM_001370921:exon12:c.A1714T:p.T572S	.	het	.	1	4243145	4243145	G	A	het	82.64	30
1	4782581	4782581	G	A	exonic	Mrpl15	.	nonsynonymous SNV	Mrpl15:NM_001177658:exon3:c.A413T:p.Q138L,Mrpl15:NM_025300:exon3:c.A413T:p.Q138L	.	het	.	1	4782581	4782581	G	A	het	153.64	20
1	4830277	4830277	T	C	exonic	Lypla1	.	nonsynonymous SNV	Lypla1:NM_001355712:exon4:c.G177C:p.M59I,Lypla1:NM_008866:exon4:c.G177C:p.M59I	.	het	.	1	4830277	4830277	T	C	het	142.64	10
1	4830282	4830282	A	G	exonic	Lypla1	.	nonsynonymous SNV	Lypla1:NM_001355712:exon4:c.T182G:p.V61G,Lypla1:NM_008866:exon4:c.T182G:p.V61G	.	het	.	1	4830282	4830282	A	G	het	139.64	11
1	8583206	8583206	T	C	exonic	Sntg1	.	nonsynonymous SNV	Sntg1:NM_001290392:exon11:c.A53G:p.N18S,Sntg1:NM_001290393:exon13:c.A809G:p.N270S,Sntg1:NM_001290390:exon14:c.A806G:p.N269S,Sntg1:NM_027671:exon14:c.A809G:p.N270S	.	het	.	1	8583206	8583206	T	C	het	243.64	10
1	8583269	8583269	A	T	exonic	Sntg1	.	nonsynonymous SNV	Sntg1:NM_001290393:exon13:c.C746A:p.A249D,Sntg1:NM_001290390:exon14:c.C743A:p.A248D,Sntg1:NM_027671:exon14:c.C746A:p.A249D	.	het	.	1	8583269	8583269	A	T	het	36.64	14
1	8595454	8595454	T	C	exonic	Sntg1	.	nonsynonymous SNV	Sntg1:NM_001290393:exon12:c.A638G:p.H213R,Sntg1:NM_001290390:exon13:c.A635G:p.H212R,Sntg1:NM_027671:exon13:c.A638G:p.H213R	.	het	.	1	8595454	8595454	T	C	het	554.64	31
1	9555597	9555597	C	T	exonic	Adhfe1	.	nonsynonymous SNV	Adhfe1:NM_001357378:exon5:c.C400T:p.H134Y,Adhfe1:NM_001357376:exon6:c.C466T:p.H156Y,Adhfe1:NM_175236:exon7:c.C604T:p.H202Y,Adhfe1:NM_001357377:exon8:c.C466T:p.H156Y	.	het	.	1	9555597	9555597	C	T	het	89.64	37
1	9557023	9557023	G	A	exonic	Adhfe1	.	nonsynonymous SNV	Adhfe1:NM_001357378:exon6:c.C442A:p.P148T,Adhfe1:NM_001357376:exon7:c.C508A:p.P170T,Adhfe1:NM_175236:exon8:c.C646A:p.P216T,Adhfe1:NM_001357377:exon9:c.C508A:p.P170T	.	het	.	1	9557023	9557023	G	A	het	51.64	17
1	9678375	9678375	C	G	exonic	Mybl1	.	nonsynonymous SNV	Mybl1:NM_001290397:exon9:c.A995C:p.Q332P,Mybl1:NM_008651:exon9:c.A995C:p.Q332P	.	het	.	1	9678375	9678375	C	G	het	40.64	14
1	9746659	9746659	C	T	exonic	Vcpip1	.	nonsynonymous SNV	Vcpip1:NM_173443:exon1:c.C1498A:p.Q500K	.	het	.	1	9746659	9746659	C	T	het	52.64	10
1	9746742	9746742	C	T	exonic	Vcpip1	.	nonsynonymous SNV	Vcpip1:NM_173443:exon1:c.G1415A:p.G472D	.	het	.	1	9746742	9746742	C	T	het	97.64	14
1	9746758	9746758	T	C	exonic	Vcpip1	.	nonsynonymous SNV	Vcpip1:NM_173443:exon1:c.A1399G:p.K467E	.	het	.	1	9746758	9746758	T	C	het	184.64	11
1	9915634	9915634	A	G	exonic	Mcmdc2	.	nonsynonymous SNV	Mcmdc2:NM_177722:exon5:c.T446G:p.F149C	.	het	.	1	9915634	9915634	A	G	het	124.64	16
1	9999975	9999975	A	G	exonic	Ppp1r42	.	nonsynonymous SNV	Ppp1r42:NM_145692:exon3:c.A292C:p.K98Q	.	het	.	1	9999975	9999975	A	G	het	395.64	15
1	11140320	11140320	T	C	exonic	Prex2	.	nonsynonymous SNV	Prex2:NM_029525:exon17:c.A1846C:p.N616H	.	het	.	1	11140320	11140320	T	C	het	242.64	14
1	11199858	11199858	G	T	exonic	Prex2	.	nonsynonymous SNV	Prex2:NM_029525:exon32:c.G3766T:p.D1256Y	.	het	.	1	11199858	11199858	G	T	het	232.64	10
1	11199861	11199861	T	C	exonic	Prex2	.	nonsynonymous SNV	Prex2:NM_029525:exon32:c.A3769C:p.M1257L	.	het	.	1	11199861	11199861	T	C	het	232.64	10
1	11199889	11199889	G	T	exonic	Prex2	.	nonsynonymous SNV	Prex2:NM_029525:exon32:c.C3797T:p.T1266I	.	het	.	1	11199889	11199889	G	T	het	24.64	14
1	11199969	11199969	C	A	exonic	Prex2	.	nonsynonymous SNV	Prex2:NM_029525:exon32:c.T3877A:p.C1293S	.	het	.	1	11199969	11199969	C	A	het	387.64	18
1	11200022	11200022	A	G	exonic	Prex2	.	nonsynonymous SNV	Prex2:NM_029525:exon32:c.T3930G:p.F1310L	.	het	.	1	11200022	11200022	A	G	het	383.64	17
1	12848448	12848448	G	C	exonic	Sulf1	.	nonsynonymous SNV	Sulf1:NM_001198566:exon19:c.G2542C:p.D848H,Sulf1:NM_001198565:exon20:c.G2542C:p.D848H,Sulf1:NM_172294:exon20:c.G2542C:p.D848H	.	het	.	1	12848448	12848448	G	C	het	49.64	11
1	13152807	13152807	G	A	exonic	Ncoa2	.	nonsynonymous SNV	Ncoa2:NM_001302702:exon16:c.A3386T:p.Q1129L,Ncoa2:NM_008678:exon17:c.A3593T:p.Q1198L	.	het	.	1	13152807	13152807	G	A	het	235.64	39
1	13152820	13152820	T	C	exonic	Ncoa2	.	nonsynonymous SNV	Ncoa2:NM_001302702:exon16:c.C3373G:p.Q1125E,Ncoa2:NM_008678:exon17:c.C3580G:p.Q1194E	.	het	.	1	13152820	13152820	T	C	het	339.64	30
1	13152829	13152829	T	A	exonic	Ncoa2	.	nonsynonymous SNV	Ncoa2:NM_001302702:exon16:c.C3364T:p.L1122F,Ncoa2:NM_008678:exon17:c.C3571T:p.L1191F	.	het	.	1	13152829	13152829	T	A	het	268.64	28
1	14884277	14884277	A	G	exonic	Trpa1	.	nonsynonymous SNV	Trpa1:NM_001348288:exon20:c.A2307C:p.K769N,Trpa1:NM_177781:exon21:c.A2397C:p.K799N	.	het	.	1	14884277	14884277	A	G	het	33.64	12
1	15710425	15710425	C	T	exonic	Kcnb2	.	nonsynonymous SNV	Kcnb2:NM_001098528:exon3:c.C1520T:p.S507F	.	het	.	1	15710425	15710425	C	T	het	229.64	11
1	15710449	15710449	A	C	exonic	Kcnb2	.	nonsynonymous SNV	Kcnb2:NM_001098528:exon3:c.T1544C:p.V515A	.	het	.	1	15710449	15710449	A	C	het	187.64	10
1	15805886	15805886	0	C	exonic	Terf1	.	nonsynonymous SNV	Terf1:NM_001286628:exon1:c.G209C:p.C70S,Terf1:NM_009352:exon1:c.G209C:p.C70S	.	het	.	1	15805886	15805886	-	C	het	342.60	14
1	15819721	15819721	C	T	exonic	Terf1	.	nonsynonymous SNV	Terf1:NM_001286628:exon5:c.A719T:p.N240I,Terf1:NM_009352:exon6:c.A806T:p.N269I	.	het	.	1	15819721	15819721	C	T	het	43.64	28
1	16392533	16392533	A	T	exonic	Stau2	.	nonsynonymous SNV	Stau2:NM_001111272:exon6:c.T566A:p.M189K,Stau2:NM_001347045:exon6:c.T566A:p.M189K,Stau2:NM_025303:exon7:c.T662A:p.M221K,Stau2:NM_001347044:exon9:c.T662A:p.M221K	.	het	.	1	16392533	16392533	A	T	het	280.64	39
1	16392534	16392534	G	A	exonic	Stau2	.	nonsynonymous SNV	Stau2:NM_001111272:exon6:c.A565T:p.M189L,Stau2:NM_001347045:exon6:c.A565T:p.M189L,Stau2:NM_025303:exon7:c.A661T:p.M221L,Stau2:NM_001347044:exon9:c.A661T:p.M221L	.	het	.	1	16392534	16392534	G	A	het	280.64	39
1	16392614	16392614	G	A	exonic	Stau2	.	nonsynonymous SNV	Stau2:NM_001111272:exon6:c.C485T:p.S162L,Stau2:NM_001347045:exon6:c.C485T:p.S162L,Stau2:NM_025303:exon7:c.C581T:p.S194L,Stau2:NM_001347044:exon9:c.C581T:p.S194L	.	het	.	1	16392614	16392614	G	A	het	259.64	46
1	17091467	17091467	G	T	exonic	Jph1	.	nonsynonymous SNV	Jph1:NM_020604:exon2:c.G970A:p.G324S	.	het	.	1	17091467	17091467	G	T	het	82.64	23
1	17091938	17091938	A	T	exonic	Jph1	.	nonsynonymous SNV	Jph1:NM_020604:exon2:c.C499A:p.R167S	.	het	.	1	17091938	17091938	A	T	het	28.64	33
1	17091940	17091940	C	G	exonic	Jph1	.	nonsynonymous SNV	Jph1:NM_020604:exon2:c.T497C:p.L166P	.	het	.	1	17091940	17091940	C	G	het	28.64	33
1	20222942	20222942	T	A	exonic	Pkhd1	.	nonsynonymous SNV	Pkhd1:NM_153179:exon54:c.A8453T:p.Q2818L	.	het	.	1	20222942	20222942	T	A	het	265.64	10
1	20361001	20361001	C	T	exonic	Pkhd1	.	nonsynonymous SNV	Pkhd1:NM_153179:exon45:c.T7185A:p.S2395R	.	het	.	1	20361001	20361001	C	T	het	26.64	16
1	20392174	20392174	A	G	exonic	Pkhd1	.	nonsynonymous SNV	Pkhd1:NM_153179:exon38:c.A6155C:p.H2052P	.	het	.	1	20392174	20392174	A	G	het	97.64	29
1	20540438	20540438	0	A	exonic	Pkhd1	.	nonsynonymous SNV	Pkhd1:NM_153179:exon28:c.G3098T:p.R1033L	.	het	.	1	20540438	20540438	-	A	het	64.60	36
1	20550948	20550948	C	A	exonic	Pkhd1	.	nonsynonymous SNV	Pkhd1:NM_153179:exon24:c.G2485T:p.A829S	.	het	.	1	20550948	20550948	C	A	het	21.64	16
1	20732118	20732118	T	G	exonic	Il17a	.	nonsynonymous SNV	Il17a:NM_010552:exon2:c.T50G:p.L17R	.	het	.	1	20732118	20732118	T	G	het	82.64	15
1	20732234	20732234	G	A	exonic	Il17a	.	nonsynonymous SNV	Il17a:NM_010552:exon2:c.T166A:p.S56T	.	het	.	1	20732234	20732234	G	A	het	128.64	12
1	21368698	21368698	C	T	exonic	Khdc1c	.	nonsynonymous SNV	Khdc1c:NM_001033904:exon1:c.A41T:p.D14V	.	het	.	1	21368698	21368698	C	T	het	46.64	12
1	21368706	21368706	A	G	exonic	Khdc1c	.	nonsynonymous SNV	Khdc1c:NM_001033904:exon1:c.C49G:p.H17D	.	het	.	1	21368706	21368706	A	G	het	46.64	12
1	21368733	21368733	G	A	exonic	Khdc1c	.	nonsynonymous SNV	Khdc1c:NM_001033904:exon1:c.G76A:p.E26K	.	het	.	1	21368733	21368733	G	A	het	46.64	12
1	21368737	21368737	G	T	exonic	Khdc1c	.	nonsynonymous SNV	Khdc1c:NM_001033904:exon1:c.A80T:p.D27V	.	het	.	1	21368737	21368737	G	T	het	46.64	12
1	21368749	21368749	T	C	exonic	Khdc1c	.	nonsynonymous SNV	Khdc1c:NM_001033904:exon1:c.A92C:p.Y31S	.	het	.	1	21368749	21368749	T	C	het	46.64	12
1	21368752	21368752	A	G	exonic	Khdc1c	.	nonsynonymous SNV	Khdc1c:NM_001033904:exon1:c.T95G:p.I32R	.	het	.	1	21368752	21368752	A	G	het	46.64	12
1	21405010	21405010	T	C	exonic	Kcnq5	.	nonsynonymous SNV	Kcnq5:NM_001310477:exon12:c.C1734G:p.S578R,Kcnq5:NM_023872:exon13:c.C1761G:p.S587R,Kcnq5:NM_001160139:exon14:c.C1818G:p.S606R	.	het	.	1	21405010	21405010	T	C	het	214.64	16
1	21405011	21405011	A	T	exonic	Kcnq5	.	nonsynonymous SNV	Kcnq5:NM_001310477:exon12:c.G1733A:p.S578N,Kcnq5:NM_023872:exon13:c.G1760A:p.S587N,Kcnq5:NM_001160139:exon14:c.G1817A:p.S606N	.	het	.	1	21405011	21405011	A	T	het	214.64	16
1	23379015	23379015	T	C	exonic	Ogfrl1	.	nonsynonymous SNV	Ogfrl1:NM_001081079:exon2:c.T281G:p.F94C,Ogfrl1:NM_001379082:exon2:c.T281G:p.F94C,Ogfrl1:NM_001379083:exon2:c.T281G:p.F94C	.	het	.	1	23379015	23379015	T	C	het	275.64	22
1	23379024	23379024	T	A	exonic	Ogfrl1	.	nonsynonymous SNV	Ogfrl1:NM_001081079:exon2:c.A272T:p.K91M,Ogfrl1:NM_001379082:exon2:c.A272T:p.K91M,Ogfrl1:NM_001379083:exon2:c.A272T:p.K91M	.	het	.	1	23379024	23379024	T	A	het	106.64	22
1	23379030	23379030	A	G	exonic	Ogfrl1	.	nonsynonymous SNV	Ogfrl1:NM_001081079:exon2:c.A266C:p.K89T,Ogfrl1:NM_001379082:exon2:c.A266C:p.K89T,Ogfrl1:NM_001379083:exon2:c.A266C:p.K89T	.	het	.	1	23379030	23379030	A	G	het	106.64	22
1	24029463	24029463	G	A	exonic	Fam135a	.	nonsynonymous SNV	Fam135a:NM_026604:exon14:c.A2324T:p.E775V	.	het	.	1	24029463	24029463	G	A	het	170.64	23
1	24029473	24029473	C	T	exonic	Fam135a	.	nonsynonymous SNV	Fam135a:NM_026604:exon14:c.G2314A:p.V772I	.	het	.	1	24029473	24029473	C	T	het	27.64	25
1	24030112	24030112	T	C	exonic	Fam135a	.	nonsynonymous SNV	Fam135a:NM_026604:exon14:c.T1675G:p.F559V	.	het	.	1	24030112	24030112	T	C	het	66.64	21
1	24264738	24264738	A	T	exonic	Col19a1	.	nonsynonymous SNV	Col19a1:NM_007733:exon51:c.T3363A:p.D1121E	.	het	.	1	24264738	24264738	A	T	het	212.64	11
1	24264781	24264781	G	A	exonic	Col19a1	.	nonsynonymous SNV	Col19a1:NM_007733:exon51:c.C3320T:p.P1107L	.	het	.	1	24264781	24264781	G	A	het	232.64	10
1	30805473	30805473	C	G	exonic	Phf3	.	nonsynonymous SNV	Phf3:NM_001081080:exon15:c.A4404C:p.Q1468H	.	het	.	1	30805473	30805473	C	G	het	257.64	15
1	32172946	32172946	A	G	exonic	Khdrbs2	.	nonsynonymous SNV	Khdrbs2:NM_133235:exon1:c.T29G:p.L10R	.	het	.	1	32172946	32172946	A	G	het	410.64	28
1	33454250	33454250	A	C	exonic	Prim2	.	nonsynonymous SNV	Prim2:NM_008922:exon14:c.C1354G:p.Q452E	.	het	.	1	33454250	33454250	A	C	het	27.64	17
1	33723952	33723952	C	A	exonic	Rab23	.	nonsynonymous SNV	Rab23:NM_001159729:exon3:c.C102A:p.F34L,Rab23:NM_008999:exon3:c.C102A:p.F34L	.	het	.	1	33723952	33723952	C	A	het	67.64	20
1	33765889	33765889	G	C	exonic	Zfp451	.	nonsynonymous SNV	Zfp451:NM_001290699:exon12:c.T2596G:p.S866A,Zfp451:NM_001359274:exon13:c.T2938G:p.S980A,Zfp451:NM_001359275:exon14:c.T3079G:p.S1027A,Zfp451:NM_133817:exon14:c.T3079G:p.S1027A	.	het	.	1	33765889	33765889	G	C	het	25.64	16
1	34188851	34188851	G	C	exonic	Dst	.	nonsynonymous SNV	Dst:NM_134448:exon36:c.A5524C:p.T1842P,Dst:NM_001276764:exon39:c.A6058C:p.T2020P	.	het	.	1	34188851	34188851	G	C	het	379.64	21
1	34188854	34188854	T	C	exonic	Dst	.	nonsynonymous SNV	Dst:NM_134448:exon36:c.T5527C:p.S1843P,Dst:NM_001276764:exon39:c.T6061C:p.S2021P	.	het	.	1	34188854	34188854	T	C	het	379.64	21
1	34188872	34188872	T	C	exonic	Dst	.	nonsynonymous SNV	Dst:NM_134448:exon36:c.G5545C:p.V1849L,Dst:NM_001276764:exon39:c.G6079C:p.V2027L	.	het	.	1	34188872	34188872	T	C	het	52.64	18
1	34188878	34188878	G	A	exonic	Dst	.	nonsynonymous SNV	Dst:NM_134448:exon36:c.G5551A:p.E1851K,Dst:NM_001276764:exon39:c.G6085A:p.E2029K	.	het	.	1	34188878	34188878	G	A	het	116.64	16
1	34535907	34535907	C	T	exonic	Cfc1	.	nonsynonymous SNV	Cfc1:NM_007685:exon1:c.G5T:p.R2I	.	het	.	1	34535907	34535907	C	T	het	95.64	20
1	34536244	34536244	T	C	exonic	Cfc1	.	nonsynonymous SNV	Cfc1:NM_007685:exon2:c.T100C:p.Y34H	.	het	.	1	34536244	34536244	T	C	het	57.64	18
1	36317205	36317205	G	C	exonic	Arid5a	.	nonsynonymous SNV	Arid5a:NM_001172205:exon3:c.A125C:p.D42A,Arid5a:NM_001172206:exon3:c.A122C:p.D41A,Arid5a:NM_001290726:exon4:c.A212C:p.D71A	.	het	.	1	36317205	36317205	G	C	het	69.64	15
1	36319487	36319487	C	T	exonic	Arid5a	.	nonsynonymous SNV	Arid5a:NM_145996:exon5:c.C883T:p.P295S,Arid5a:NM_001290727:exon6:c.C580T:p.P194S,Arid5a:NM_001172205:exon7:c.C1057T:p.P353S,Arid5a:NM_001172206:exon7:c.C1054T:p.P352S,Arid5a:NM_001290726:exon8:c.C1144T:p.P382S	.	het	.	1	36319487	36319487	C	T	het	130.64	14
1	36319488	36319488	A	G	exonic	Arid5a	.	nonsynonymous SNV	Arid5a:NM_145996:exon5:c.C884G:p.P295R,Arid5a:NM_001290727:exon6:c.C581G:p.P194R,Arid5a:NM_001172205:exon7:c.C1058G:p.P353R,Arid5a:NM_001172206:exon7:c.C1055G:p.P352R,Arid5a:NM_001290726:exon8:c.C1145G:p.P382R	.	het	.	1	36319488	36319488	A	G	het	130.64	14
1	36351720	36351720	A	G	exonic	Kansl3	.	nonsynonymous SNV	Kansl3:NM_001310513:exon11:c.G1232C:p.C411S,Kansl3:NM_172652:exon11:c.G1232C:p.C411S	.	het	.	1	36351720	36351720	A	G	het	208.64	18
1	36351775	36351775	T	C	exonic	Kansl3	.	nonsynonymous SNV	Kansl3:NM_001310513:exon11:c.C1177G:p.L393V,Kansl3:NM_172652:exon11:c.C1177G:p.L393V	.	het	.	1	36351775	36351775	T	C	het	226.64	12
1	36409152	36409152	C	T	exonic	Fer1l5	.	nonsynonymous SNV	Fer1l5:NM_001277076:exon30:c.A3095T:p.Q1032L	.	het	.	1	36409152	36409152	C	T	het	118.64	11
1	36409194	36409194	C	T	exonic	Fer1l5	.	nonsynonymous SNV	Fer1l5:NM_001277076:exon30:c.G3137T:p.W1046L	.	het	.	1	36409194	36409194	C	T	het	40.64	14
1	36549546	36549546	G	A	exonic	Sema4c	.	nonsynonymous SNV	Sema4c:NM_001126047:exon15:c.C2498T:p.S833L,Sema4c:NM_001304329:exon15:c.C2498T:p.S833L,Sema4c:NM_001304330:exon16:c.C2498T:p.S833L	.	het	.	1	36549546	36549546	G	A	het	97.64	10
1	36549547	36549547	C	T	exonic	Sema4c	.	nonsynonymous SNV	Sema4c:NM_001126047:exon15:c.T2497A:p.S833T,Sema4c:NM_001304329:exon15:c.T2497A:p.S833T,Sema4c:NM_001304330:exon16:c.T2497A:p.S833T	.	het	.	1	36549547	36549547	C	T	het	97.64	10
1	36553274	36553274	A	T	exonic	Sema4c	.	nonsynonymous SNV	Sema4c:NM_001126047:exon7:c.T584A:p.M195K,Sema4c:NM_001304329:exon7:c.T584A:p.M195K,Sema4c:NM_001304330:exon8:c.T584A:p.M195K	.	het	.	1	36553274	36553274	A	T	het	40.64	14
1	36553304	36553304	C	T	exonic	Sema4c	.	nonsynonymous SNV	Sema4c:NM_001126047:exon7:c.T554A:p.L185Q,Sema4c:NM_001304329:exon7:c.T554A:p.L185Q,Sema4c:NM_001304330:exon8:c.T554A:p.L185Q	.	het	.	1	36553304	36553304	C	T	het	265.64	14
1	37042366	37042366	G	A	exonic	Vwa3b	.	nonsynonymous SNV	Vwa3b:NM_001370828:exon3:c.G187A:p.A63T,Vwa3b:NM_001370829:exon3:c.G187A:p.A63T	.	het	.	1	37042366	37042366	G	A	het	310.64	14
1	37186578	37186578	T	C	exonic	Vwa3b	.	nonsynonymous SNV	Vwa3b:NM_001370828:exon27:c.G3475C:p.E1159Q	.	het	.	1	37186578	37186578	T	C	het	67.64	13
1	37804655	37804655	T	G	exonic	Tsga10	.	nonsynonymous SNV	Tsga10:NM_001290721:exon13:c.A1192C:p.K398Q,Tsga10:NM_001290720:exon14:c.A1192C:p.K398Q,Tsga10:NM_207228:exon14:c.A1192C:p.K398Q	.	het	.	1	37804655	37804655	T	G	het	277.64	25
1	38040692	38040692	T	C	exonic	Eif5b	.	nonsynonymous SNV	Eif5b:NM_198303:exon13:c.G2069C:p.R690P	.	het	.	1	38040692	38040692	T	C	het	174.64	13
1	38041808	38041808	T	C	exonic	Eif5b	.	nonsynonymous SNV	Eif5b:NM_198303:exon14:c.A2229C:p.K743N	.	het	.	1	38041808	38041808	T	C	het	34.64	31
1	38041810	38041810	A	G	exonic	Eif5b	.	nonsynonymous SNV	Eif5b:NM_198303:exon14:c.A2231G:p.K744R	.	het	.	1	38041810	38041810	A	G	het	34.64	31
1	38041819	38041819	G	A	exonic	Eif5b	.	nonsynonymous SNV	Eif5b:NM_198303:exon14:c.T2240A:p.F747Y	.	het	.	1	38041819	38041819	G	A	het	67.64	20
1	38041821	38041821	C	G	exonic	Eif5b	.	nonsynonymous SNV	Eif5b:NM_198303:exon14:c.A2242G:p.I748V	.	het	.	1	38041821	38041821	C	G	het	67.64	20
1	38800757	38800757	G	A	exonic	Lonrf2	.	nonsynonymous SNV	Lonrf2:NM_001029878:exon11:c.C1964T:p.S655F	.	het	.	1	38800757	38800757	G	A	het	97.64	10
1	39333867	39333867	C	G	exonic	Npas2	.	nonsynonymous SNV	Npas2:NM_008719:exon13:c.T1198G:p.S400A	.	het	.	1	39333867	39333867	C	G	het	122.64	11
1	39478494	39478494	C	T	exonic	Tbc1d8	.	nonsynonymous SNV	Tbc1d8:NM_001357521:exon1:c.T73A:p.Y25N,Tbc1d8:NM_001357522:exon1:c.T73A:p.Y25N,Tbc1d8:NM_018775:exon1:c.T73A:p.Y25N	.	het	.	1	39478494	39478494	C	T	het	22.64	20
1	40548985	40548985	A	G	exonic	Il18rap	.	nonsynonymous SNV	Il18rap:NM_010553:exon13:c.A1742G:p.E581G	.	het	.	1	40548985	40548985	A	G	het	145.64	24
1	42697900	42697900	C	T	exonic	Pou3f3	.	nonsynonymous SNV	Pou3f3:NM_008900:exon1:c.G755T:p.S252I	.	het	.	1	42697900	42697900	C	T	het	38.64	12
1	42697918	42697918	T	C	exonic	Pou3f3	.	nonsynonymous SNV	Pou3f3:NM_008900:exon1:c.T773C:p.L258P	.	het	.	1	42697918	42697918	T	C	het	34.64	12
1	44063636	44063636	C	G	exonic	Gm8251	.	nonsynonymous SNV	Gm8251:NM_001376984:exon4:c.G12089C:p.S4030T	.	het	.	1	44063636	44063636	C	G	het	326.64	18
1	44068182	44068182	A	C	exonic	Gm8251	.	nonsynonymous SNV	Gm8251:NM_001376984:exon4:c.A7543G:p.N2515D	.	het	.	1	44068182	44068182	A	C	het	74.64	15
1	44068187	44068187	C	T	exonic	Gm8251	.	nonsynonymous SNV	Gm8251:NM_001376984:exon4:c.C7538A:p.T2513N	.	het	.	1	44068187	44068187	C	T	het	74.64	15
1	44068256	44068256	A	G	exonic	Gm8251	.	nonsynonymous SNV	Gm8251:NM_001376984:exon4:c.T7469C:p.M2490T	.	het	.	1	44068256	44068256	A	G	het	30.64	13
1	44068282	44068282	G	C	exonic	Gm8251	.	nonsynonymous SNV	Gm8251:NM_001376984:exon4:c.T7443G:p.H2481Q	.	het	.	1	44068282	44068282	G	C	het	121.64	17
1	44068707	44068707	A	G	exonic	Gm8251	.	nonsynonymous SNV	Gm8251:NM_001376984:exon4:c.A7018C:p.I2340L	.	het	.	1	44068707	44068707	A	G	het	101.64	14
1	44071010	44071010	C	A	exonic	Gm8251	.	nonsynonymous SNV	Gm8251:NM_001376984:exon4:c.G4715T:p.R1572I	.	het	.	1	44071010	44071010	C	A	het	85.64	14
1	44071026	44071026	T	A	exonic	Gm8251	.	nonsynonymous SNV	Gm8251:NM_001376984:exon4:c.C4699T:p.P1567S	.	het	.	1	44071026	44071026	T	A	het	24.64	13
1	44071064	44071064	G	C	exonic	Gm8251	.	nonsynonymous SNV	Gm8251:NM_001376984:exon4:c.C4661G:p.A1554G	.	het	.	1	44071064	44071064	G	C	het	79.64	16
1	44071077	44071077	T	G	exonic	Gm8251	.	nonsynonymous SNV	Gm8251:NM_001376984:exon4:c.A4648C:p.N1550H	.	het	.	1	44071077	44071077	T	G	het	89.64	17
1	44071182	44071182	T	C	exonic	Gm8251	.	nonsynonymous SNV	Gm8251:NM_001376984:exon4:c.C4543G:p.R1515G	.	het	.	1	44071182	44071182	T	C	het	85.64	14
1	44071185	44071185	T	C	exonic	Gm8251	.	nonsynonymous SNV	Gm8251:NM_001376984:exon4:c.C4540G:p.Q1514E	.	het	.	1	44071185	44071185	T	C	het	85.64	14
1	44071186	44071186	G	A	exonic	Gm8251	.	nonsynonymous SNV	Gm8251:NM_001376984:exon4:c.A4539T:p.R1513S	.	het	.	1	44071186	44071186	G	A	het	85.64	14
1	44091462	44091462	A	C	exonic	Tex30	.	nonsynonymous SNV	Tex30:NM_001356297:exon3:c.T145G:p.S49A,Tex30:NM_001356296:exon4:c.T145G:p.S49A,Tex30:NM_029368:exon5:c.T145G:p.S49A	.	het	.	1	44091462	44091462	A	C	het	49.64	11
1	44091465	44091465	C	A	exonic	Tex30	.	nonsynonymous SNV	Tex30:NM_001356297:exon3:c.A142T:p.M48L,Tex30:NM_001356296:exon4:c.A142T:p.M48L,Tex30:NM_029368:exon5:c.A142T:p.M48L	.	het	.	1	44091465	44091465	C	A	het	49.64	11
1	44091471	44091471	G	T	exonic	Tex30	.	nonsynonymous SNV	Tex30:NM_001356297:exon3:c.C136A:p.H46N,Tex30:NM_001356296:exon4:c.C136A:p.H46N,Tex30:NM_029368:exon5:c.C136A:p.H46N	.	het	.	1	44091471	44091471	G	T	het	85.64	15
1	44091474	44091474	T	C	exonic	Tex30	.	nonsynonymous SNV	Tex30:NM_001356297:exon3:c.C133G:p.P45A,Tex30:NM_001356296:exon4:c.C133G:p.P45A,Tex30:NM_029368:exon5:c.C133G:p.P45A	.	het	.	1	44091474	44091474	T	C	het	82.64	15
1	44091573	44091573	A	C	exonic	Tex30	.	nonsynonymous SNV	Tex30:NM_001356297:exon3:c.T34G:p.F12V,Tex30:NM_001356296:exon4:c.T34G:p.F12V,Tex30:NM_029368:exon5:c.T34G:p.F12V	.	het	.	1	44091573	44091573	A	C	het	42.64	20
1	45334222	45334222	T	C	exonic	Col3a1	.	nonsynonymous SNV	Col3a1:NM_009930:exon24:c.A1668C:p.Q556H	.	het	.	1	45334222	45334222	T	C	het	346.64	17
1	45334223	45334223	T	C	exonic	Col3a1	.	nonsynonymous SNV	Col3a1:NM_009930:exon24:c.G1669C:p.G557R	.	het	.	1	45334223	45334223	T	C	het	346.64	17
1	45345059	45345059	C	T	exonic	Col3a1	.	nonsynonymous SNV	Col3a1:NM_009930:exon47:c.G3522T:p.E1174D	.	het	.	1	45345059	45345059	C	T	het	81.64	11
1	45403165	45403165	0	T	exonic	Col5a2	.	nonsynonymous SNV	Col5a2:NM_007737:exon29:c.C1922A:p.A641D	.	het	.	1	45403165	45403165	-	T	het	97.60	10
1	45403267	45403267	G	A	exonic	Col5a2	.	nonsynonymous SNV	Col5a2:NM_007737:exon28:c.G1910T:p.G637V	.	het	.	1	45403267	45403267	G	A	het	52.64	10
1	45403268	45403268	A	G	exonic	Col5a2	.	nonsynonymous SNV	Col5a2:NM_007737:exon28:c.G1909C:p.G637R	.	het	.	1	45403268	45403268	A	G	het	52.64	10
1	46081448	46081448	0	T	exonic	Dnah7b	.	nonsynonymous SNV	Dnah7b:NM_001368717:exon3:c.G92T:p.S31I	.	het	.	1	46081448	46081448	-	T	het	121.60	17
1	46081454	46081454	T	C	exonic	Dnah7b	.	nonsynonymous SNV	Dnah7b:NM_001368717:exon3:c.A98C:p.E33A	.	het	.	1	46081454	46081454	T	C	het	121.64	17
1	46081474	46081474	G	T	exonic	Dnah7b	.	nonsynonymous SNV	Dnah7b:NM_001368717:exon3:c.A118T:p.T40S	.	het	.	1	46081474	46081474	G	T	het	20.64	18
1	46081483	46081483	A	G	exonic	Dnah7b	.	nonsynonymous SNV	Dnah7b:NM_001368717:exon3:c.C127G:p.P43A	.	het	.	1	46081483	46081483	A	G	het	200.64	18
1	46081489	46081489	T	G	exonic	Dnah7b	.	nonsynonymous SNV	Dnah7b:NM_001368717:exon3:c.T133G:p.L45V	.	het	.	1	46081489	46081489	T	G	het	117.64	19
1	46182377	46182377	G	C	exonic	Dnah7b	.	nonsynonymous SNV	Dnah7b:NM_001368717:exon22:c.T3508C:p.S1170P	.	het	.	1	46182377	46182377	G	C	het	41.64	23
1	46187219	46187219	C	A	exonic	Dnah7b	.	nonsynonymous SNV	Dnah7b:NM_001368717:exon23:c.G3677A:p.G1226D	.	het	.	1	46187219	46187219	C	A	het	39.64	24
1	46324841	46324841	T	C	exonic	Dnah7b	.	nonsynonymous SNV	Dnah7b:NM_001368717:exon56:c.G10488C:p.W3496C	.	het	.	1	46324841	46324841	T	C	het	250.64	24
1	46325840	46325840	G	T	exonic	Dnah7b	.	nonsynonymous SNV	Dnah7b:NM_001368717:exon57:c.A10648T:p.N3550Y	.	het	.	1	46325840	46325840	G	T	het	67.64	20
1	46358150	46358150	T	G	exonic	Dnah7b	.	nonsynonymous SNV	Dnah7b:NM_001368717:exon63:c.C11608G:p.P3870A	.	het	.	1	46358150	46358150	T	G	het	364.64	39
1	46373357	46373357	T	C	exonic	Dnah7b	.	nonsynonymous SNV	Dnah7b:NM_001368717:exon65:c.T11993C:p.I3998T	.	het	.	1	46373357	46373357	T	C	het	28.64	15
1	46373389	46373389	G	A	exonic	Dnah7b	.	nonsynonymous SNV	Dnah7b:NM_001368717:exon65:c.G12025A:p.E4009K	.	het	.	1	46373389	46373389	G	A	het	21.64	16
1	46532610	46532610	C	A	exonic	Dnah7c	.	nonsynonymous SNV	Dnah7c:NM_001310335:exon18:c.T2242A:p.W748R	.	het	.	1	46532610	46532610	C	A	het	37.64	15
1	46532613	46532613	C	A	exonic	Dnah7c	.	nonsynonymous SNV	Dnah7c:NM_001310335:exon18:c.G2245A:p.V749I	.	het	.	1	46532613	46532613	C	A	het	37.64	15
1	46532645	46532645	C	G	exonic	Dnah7c	.	nonsynonymous SNV	Dnah7c:NM_001310335:exon18:c.C2277G:p.I759M	.	het	.	1	46532645	46532645	C	G	het	122.64	11
1	46535064	46535064	A	T	exonic	Dnah7c	.	nonsynonymous SNV	Dnah7c:NM_001310335:exon19:c.G2898T:p.W966C	.	het	.	1	46535064	46535064	A	T	het	55.64	37
1	46535090	46535090	A	T	exonic	Dnah7c	.	nonsynonymous SNV	Dnah7c:NM_001310335:exon19:c.A2924T:p.E975V	.	het	.	1	46535090	46535090	A	T	het	127.64	45
1	46535092	46535092	A	C	exonic	Dnah7c	.	nonsynonymous SNV	Dnah7c:NM_001310335:exon19:c.A2926C:p.I976L	.	het	.	1	46535092	46535092	A	C	het	127.64	45
1	46615083	46615083	C	T	exonic	Dnah7c	.	nonsynonymous SNV	Dnah7c:NM_001310335:exon26:c.G4133T:p.C1378F	.	het	.	1	46615083	46615083	C	T	het	32.64	19
1	46819125	46819125	A	G	exonic	Slc39a10	.	nonsynonymous SNV	Slc39a10:NM_172653:exon7:c.A2011C:p.I671L,Slc39a10:NM_001356416:exon8:c.A2011C:p.I671L,Slc39a10:NM_001356417:exon8:c.A2011C:p.I671L	.	het	.	1	46819125	46819125	A	G	het	94.64	11
1	46819127	46819127	A	C	exonic	Slc39a10	.	nonsynonymous SNV	Slc39a10:NM_172653:exon7:c.A2009G:p.N670S,Slc39a10:NM_001356416:exon8:c.A2009G:p.N670S,Slc39a10:NM_001356417:exon8:c.A2009G:p.N670S	.	het	.	1	46819127	46819127	A	C	het	171.64	11
1	46819128	46819128	T	G	exonic	Slc39a10	.	nonsynonymous SNV	Slc39a10:NM_172653:exon7:c.A2008C:p.N670H,Slc39a10:NM_001356416:exon8:c.A2008C:p.N670H,Slc39a10:NM_001356417:exon8:c.A2008C:p.N670H	.	het	.	1	46819128	46819128	T	G	het	94.64	11
1	46819244	46819244	A	G	exonic	Slc39a10	.	nonsynonymous SNV	Slc39a10:NM_172653:exon7:c.A1892C:p.H631P,Slc39a10:NM_001356416:exon8:c.A1892C:p.H631P,Slc39a10:NM_001356417:exon8:c.A1892C:p.H631P	.	het	.	1	46819244	46819244	A	G	het	214.64	16
1	46819245	46819245	G	T	exonic	Slc39a10	.	nonsynonymous SNV	Slc39a10:NM_172653:exon7:c.C1891A:p.H631N,Slc39a10:NM_001356416:exon8:c.C1891A:p.H631N,Slc39a10:NM_001356417:exon8:c.C1891A:p.H631N	.	het	.	1	46819245	46819245	G	T	het	214.64	16
1	46819292	46819292	G	T	exonic	Slc39a10	.	nonsynonymous SNV	Slc39a10:NM_172653:exon7:c.T1844A:p.L615Q,Slc39a10:NM_001356416:exon8:c.T1844A:p.L615Q,Slc39a10:NM_001356417:exon8:c.T1844A:p.L615Q	.	het	.	1	46819292	46819292	G	T	het	116.64	13
1	46819316	46819316	G	T	exonic	Slc39a10	.	nonsynonymous SNV	Slc39a10:NM_172653:exon7:c.T1820A:p.M607K,Slc39a10:NM_001356416:exon8:c.T1820A:p.M607K,Slc39a10:NM_001356417:exon8:c.T1820A:p.M607K	.	het	.	1	46819316	46819316	G	T	het	119.64	15
1	46820529	46820529	C	A	exonic	Slc39a10	.	nonsynonymous SNV	Slc39a10:NM_172653:exon6:c.C1696T:p.L566F,Slc39a10:NM_001356416:exon7:c.C1696T:p.L566F,Slc39a10:NM_001356417:exon7:c.C1696T:p.L566F	.	het	.	1	46820529	46820529	C	A	het	22.64	20
1	46820532	46820532	C	T	exonic	Slc39a10	.	nonsynonymous SNV	Slc39a10:NM_172653:exon6:c.C1693A:p.P565T,Slc39a10:NM_001356416:exon7:c.C1693A:p.P565T,Slc39a10:NM_001356417:exon7:c.C1693A:p.P565T	.	het	.	1	46820532	46820532	C	T	het	22.64	20
1	46820556	46820556	C	A	exonic	Slc39a10	.	nonsynonymous SNV	Slc39a10:NM_172653:exon6:c.G1669T:p.D557Y,Slc39a10:NM_001356416:exon7:c.G1669T:p.D557Y,Slc39a10:NM_001356417:exon7:c.G1669T:p.D557Y	.	het	.	1	46820556	46820556	C	A	het	127.64	15
1	51472360	51472360	T	C	exonic	Nabp1	.	nonsynonymous SNV	Nabp1:NM_001310548:exon5:c.T159G:p.D53E,Nabp1:NM_001310549:exon5:c.T159G:p.D53E,Nabp1:NM_028696:exon5:c.T399G:p.D133E	.	het	.	1	51472360	51472360	T	C	het	32.64	21
1	52658718	52658718	A	T	exonic	Mfsd6	.	nonsynonymous SNV	Mfsd6:NM_001357464:exon7:c.C2187A:p.H729Q	.	het	.	1	52658718	52658718	A	T	het	20.64	15
1	53282057	53282057	T	A	exonic	Pms1	.	nonsynonymous SNV	Pms1:NM_153556:exon2:c.G16T:p.A6S	.	het	.	1	53282057	53282057	T	A	het	70.64	23
1	53314979	53314979	G	A	exonic	Osgepl1	.	nonsynonymous SNV	Osgepl1:NM_001285839:exon2:c.C101A:p.S34Y	.	het	.	1	53314979	53314979	G	A	het	43.64	13
1	53315039	53315039	T	C	exonic	Osgepl1	.	nonsynonymous SNV	Osgepl1:NM_001285839:exon2:c.T161C:p.V54A	.	het	.	1	53315039	53315039	T	C	het	39.64	10
1	53528816	53528816	T	C	exonic	Dnah7a	.	nonsynonymous SNV	Dnah7a:NM_001252070:exon36:c.C5620G:p.R1874G	.	het	.	1	53528816	53528816	T	C	het	47.64	24
1	53757511	53757511	T	C	exonic	Stk17b	.	nonsynonymous SNV	Stk17b:NM_133810:exon8:c.C1096G:p.L366V	.	het	.	1	53757511	53757511	T	C	het	76.64	13
1	53757532	53757532	T	C	exonic	Stk17b	.	nonsynonymous SNV	Stk17b:NM_133810:exon8:c.T1075G:p.S359A	.	het	.	1	53757532	53757532	T	C	het	82.64	15
1	53757552	53757552	A	G	exonic	Stk17b	.	nonsynonymous SNV	Stk17b:NM_133810:exon8:c.A1055C:p.K352T	.	het	.	1	53757552	53757552	A	G	het	72.64	14
1	54356757	54356757	T	G	exonic	Ccdc150	.	nonsynonymous SNV	Ccdc150:NM_030025:exon21:c.C2398G:p.L800V	.	het	.	1	54356757	54356757	T	G	het	27.64	25
1	54987399	54987399	T	G	exonic	Sf3b1	.	nonsynonymous SNV	Sf3b1:NM_031179:exon25:c.T3850C:p.Y1284H	.	het	.	1	54987399	54987399	T	G	het	36.64	14
1	54987429	54987429	0	A	exonic	Sf3b1	.	nonsynonymous SNV	Sf3b1:NM_031179:exon25:c.A3820T:p.I1274F	.	het	.	1	54987429	54987429	-	A	het	41.60	16
1	54987446	54987446	A	G	exonic	Sf3b1	.	nonsynonymous SNV	Sf3b1:NM_031179:exon25:c.T3803C:p.I1268T	.	het	.	1	54987446	54987446	A	G	het	49.64	12
1	58169803	58169803	T	A	exonic	Aox3	.	nonsynonymous SNV	Aox3:NM_023617:exon23:c.C2494A:p.L832I	.	het	.	1	58169803	58169803	T	A	het	46.64	12
1	58169831	58169831	C	G	exonic	Aox3	.	nonsynonymous SNV	Aox3:NM_023617:exon23:c.C2522G:p.T841S	.	het	.	1	58169831	58169831	C	G	het	82.64	15
1	58169833	58169833	G	C	exonic	Aox3	.	nonsynonymous SNV	Aox3:NM_023617:exon23:c.G2524C:p.G842R	.	het	.	1	58169833	58169833	G	C	het	82.64	15
1	58169837	58169837	T	A	exonic	Aox3	.	nonsynonymous SNV	Aox3:NM_023617:exon23:c.G2528A:p.G843E	.	het	.	1	58169837	58169837	T	A	het	40.64	14
1	59851240	59851240	T	C	exonic	Bmpr2	.	nonsynonymous SNV	Bmpr2:NM_007561:exon8:c.G1030C:p.D344H	.	het	.	1	59851240	59851240	T	C	het	46.64	12
1	60148097	60148097	T	C	exonic	Carf	.	nonsynonymous SNV	Carf:NM_001285473:exon13:c.G1753C:p.E585Q,Carf:NM_139150:exon15:c.G1858C:p.E620Q,Carf:NM_001285463:exon17:c.G1501C:p.E501Q	.	het	.	1	60148097	60148097	T	C	het	258.64	11
1	60257431	60257431	T	G	exonic	Nbeal1	.	nonsynonymous SNV	Nbeal1:NM_173444:exon25:c.T3479G:p.V1160G	.	het	.	1	60257431	60257431	T	G	het	28.64	18
1	60257443	60257443	T	C	exonic	Nbeal1	.	nonsynonymous SNV	Nbeal1:NM_173444:exon25:c.T3491C:p.M1164T	.	het	.	1	60257443	60257443	T	C	het	82.64	15
1	60257451	60257451	A	G	exonic	Nbeal1	.	nonsynonymous SNV	Nbeal1:NM_173444:exon25:c.T3499G:p.C1167G	.	het	.	1	60257451	60257451	A	G	het	82.64	15
1	60257467	60257467	A	G	exonic	Nbeal1	.	nonsynonymous SNV	Nbeal1:NM_173444:exon25:c.A3515G:p.E1172G	.	het	.	1	60257467	60257467	A	G	het	85.64	14
1	60257473	60257473	C	T	exonic	Nbeal1	.	nonsynonymous SNV	Nbeal1:NM_173444:exon25:c.G3521T:p.S1174I	.	het	.	1	60257473	60257473	C	T	het	91.64	12
1	60438953	60438953	T	C	exonic	Abi2	.	nonsynonymous SNV	Abi2:NM_001198570:exon4:c.A474C:p.R158S,Abi2:NM_001198571:exon4:c.A474C:p.R158S	.	het	.	1	60438953	60438953	T	C	het	133.64	13
1	60438954	60438954	G	A	exonic	Abi2	.	nonsynonymous SNV	Abi2:NM_001198570:exon4:c.T475A:p.F159I,Abi2:NM_001198571:exon4:c.T475A:p.F159I	.	het	.	1	60438954	60438954	G	A	het	133.64	13
1	60498460	60498460	C	A	exonic	Raph1	.	nonsynonymous SNV	Raph1:NM_001045513:exon10:c.A1380T:p.K460N	.	het	.	1	60498460	60498460	C	A	het	146.64	26
1	63058053	63058053	G	A	exonic	Ino80d	.	nonsynonymous SNV	Ino80d:NM_001081436:exon12:c.G2681T:p.G894V,Ino80d:NM_001114609:exon12:c.G2996T:p.G999V	.	het	.	1	63058053	63058053	G	A	het	43.64	13
1	63058199	63058199	C	G	exonic	Ino80d	.	nonsynonymous SNV	Ino80d:NM_001081436:exon12:c.G2535C:p.M845I,Ino80d:NM_001114609:exon12:c.G2850C:p.M950I	.	het	.	1	63058199	63058199	C	G	het	34.64	16
1	63058203	63058203	0	G	exonic	Ino80d	.	nonsynonymous SNV	Ino80d:NM_001081436:exon12:c.G2531C:p.G844A,Ino80d:NM_001114609:exon12:c.G2846C:p.G949A	.	het	.	1	63058203	63058203	-	G	het	28.60	18
1	63061055	63061055	A	C	exonic	Ino80d	.	nonsynonymous SNV	Ino80d:NM_001081436:exon11:c.T1573G:p.F525V,Ino80d:NM_001114609:exon11:c.T1888G:p.F630V	.	het	.	1	63061055	63061055	A	C	het	176.64	20
1	63307766	63307766	C	G	exonic	Zdbf2	.	nonsynonymous SNV	Zdbf2:NM_001267872:exon6:c.C5303G:p.P1768R,Zdbf2:NM_001285937:exon6:c.C5318G:p.P1773R,Zdbf2:NM_001285936:exon7:c.C5318G:p.P1773R,Zdbf2:NM_028673:exon7:c.C5303G:p.P1768R	.	het	.	1	63307766	63307766	C	G	het	340.64	19
1	63307771	63307771	C	G	exonic	Zdbf2	.	nonsynonymous SNV	Zdbf2:NM_001267872:exon6:c.C5308G:p.P1770A,Zdbf2:NM_001285937:exon6:c.C5323G:p.P1775A,Zdbf2:NM_001285936:exon7:c.C5323G:p.P1775A,Zdbf2:NM_028673:exon7:c.C5308G:p.P1770A	.	het	.	1	63307771	63307771	C	G	het	343.64	18
1	63446281	63446281	C	A	exonic	Adam23	.	nonsynonymous SNV	Adam23:NM_011780:exon1:c.G71A:p.G24D	.	het	.	1	63446281	63446281	C	A	het	124.64	16
1	63446298	63446298	G	A	exonic	Adam23	.	nonsynonymous SNV	Adam23:NM_011780:exon1:c.G88A:p.A30T	.	het	.	1	63446298	63446298	G	A	het	127.64	15
1	63446307	63446307	C	T	exonic	Adam23	.	nonsynonymous SNV	Adam23:NM_011780:exon1:c.G97T:p.V33L	.	het	.	1	63446307	63446307	C	T	het	21.64	16
1	63446319	63446319	0	A	exonic	Adam23	.	nonsynonymous SNV	Adam23:NM_011780:exon1:c.G109A:p.A37T	.	het	.	1	63446319	63446319	-	A	het	163.60	18
1	63446347	63446347	A	C	exonic	Adam23	.	nonsynonymous SNV	Adam23:NM_011780:exon1:c.T137C:p.L46P	.	het	.	1	63446347	63446347	A	C	het	25.64	16
1	65030644	65030644	T	C	exonic	Akr1cl	.	nonsynonymous SNV	Akr1cl:NM_027582:exon2:c.A5G:p.N2S	.	het	.	1	65030644	65030644	T	C	het	124.64	16
1	66527914	66527914	T	C	exonic	Unc80	.	nonsynonymous SNV	Unc80:NM_001368824:exon16:c.A2678C:p.K893T,Unc80:NM_001368825:exon16:c.A2678C:p.K893T,Unc80:NM_175510:exon16:c.A2678C:p.K893T	.	het	.	1	66527914	66527914	T	C	het	136.64	12
1	66527922	66527922	C	T	exonic	Unc80	.	nonsynonymous SNV	Unc80:NM_001368824:exon16:c.G2686T:p.A896S,Unc80:NM_001368825:exon16:c.G2686T:p.A896S,Unc80:NM_175510:exon16:c.G2686T:p.A896S	.	het	.	1	66527922	66527922	C	T	het	133.64	13
1	66700962	66700962	A	C	exonic	Rpe	.	nonsynonymous SNV	Rpe:NM_001310642:exon1:c.T56C:p.L19P,Rpe:NM_025683:exon1:c.T56C:p.L19P	.	het	.	1	66700962	66700962	A	C	het	84.64	11
1	72192170	72192170	C	T	exonic	Mreg	.	nonsynonymous SNV	Mreg:NM_001005423:exon2:c.C128A:p.T43N,Mreg:NM_001357488:exon3:c.C50A:p.T17N	.	het	.	1	72192170	72192170	C	T	het	169.64	13
1	72261991	72261991	C	T	exonic	Pecr	.	nonsynonymous SNV	Pecr:NM_001356516:exon6:c.G349A:p.G117R,Pecr:NM_023523:exon7:c.G787A:p.G263R	.	het	.	1	72261991	72261991	C	T	het	478.64	18
1	72261994	72261994	A	T	exonic	Pecr	.	nonsynonymous SNV	Pecr:NM_001356516:exon6:c.G346A:p.D116N,Pecr:NM_023523:exon7:c.G784A:p.D262N	.	het	.	1	72261994	72261994	A	T	het	478.64	18
1	72262027	72262027	0	T	exonic	Pecr	.	nonsynonymous SNV	Pecr:NM_001356516:exon6:c.G313A:p.A105T,Pecr:NM_023523:exon7:c.G751A:p.A251T	.	het	.	1	72262027	72262027	-	T	het	79.60	16
1	74380948	74380948	G	A	exonic	Slc11a1	.	nonsynonymous SNV	Slc11a1:NM_013612:exon8:c.G737A:p.G246D	.	het	.	1	74380948	74380948	G	A	het	239.64	15
1	74456089	74456089	G	A	exonic	Usp37	.	nonsynonymous SNV	Usp37:NM_001310662:exon17:c.A1967T:p.D656V,Usp37:NM_176972:exon19:c.A2033T:p.D678V	.	het	.	1	74456089	74456089	G	A	het	350.64	21
1	74456101	74456101	T	C	exonic	Usp37	.	nonsynonymous SNV	Usp37:NM_001310662:exon17:c.A1955G:p.Q652R,Usp37:NM_176972:exon19:c.A2021G:p.Q674R	.	het	.	1	74456101	74456101	T	C	het	316.64	20
1	74456118	74456118	T	C	exonic	Usp37	.	nonsynonymous SNV	Usp37:NM_001310662:exon17:c.T1938G:p.D646E,Usp37:NM_176972:exon19:c.T2004G:p.D668E	.	het	.	1	74456118	74456118	T	C	het	115.64	19
1	74456119	74456119	G	A	exonic	Usp37	.	nonsynonymous SNV	Usp37:NM_001310662:exon17:c.A1937T:p.D646V,Usp37:NM_176972:exon19:c.A2003T:p.D668V	.	het	.	1	74456119	74456119	G	A	het	115.64	19
1	74456120	74456120	A	G	exonic	Usp37	.	nonsynonymous SNV	Usp37:NM_001310662:exon17:c.G1936C:p.D646H,Usp37:NM_176972:exon19:c.G2002C:p.D668H	.	het	.	1	74456120	74456120	A	G	het	115.64	19
1	74456140	74456140	A	G	exonic	Usp37	.	nonsynonymous SNV	Usp37:NM_001310662:exon17:c.T1916C:p.V639A,Usp37:NM_176972:exon19:c.T1982C:p.V661A	.	het	.	1	74456140	74456140	A	G	het	25.64	19
1	74456152	74456152	G	A	exonic	Usp37	.	nonsynonymous SNV	Usp37:NM_001310662:exon17:c.A1904T:p.K635I,Usp37:NM_176972:exon19:c.A1970T:p.K657I	.	het	.	1	74456152	74456152	G	A	het	148.64	23
1	74573572	74573572	A	G	exonic	Zfp142	.	nonsynonymous SNV	Zfp142:NM_001310668:exon6:c.G2018C:p.S673T,Zfp142:NM_029888:exon6:c.G1709C:p.S570T	.	het	.	1	74573572	74573572	A	G	het	310.64	29
1	74594183	74594183	A	C	exonic	Rnf25	.	nonsynonymous SNV	Rnf25:NM_001305230:exon10:c.C1009G:p.R337G,Rnf25:NM_021313:exon10:c.C1012G:p.R338G	.	het	.	1	74594183	74594183	A	C	het	267.64	13
1	74594215	74594215	C	T	exonic	Rnf25	.	nonsynonymous SNV	Rnf25:NM_001305230:exon10:c.G977A:p.G326D,Rnf25:NM_021313:exon10:c.G980A:p.G327D	.	het	.	1	74594215	74594215	C	T	het	311.64	17
1	74680234	74680234	T	C	exonic	Ttll4	.	nonsynonymous SNV	Ttll4:NM_001014974:exon3:c.A1243C:p.S415R	.	het	.	1	74680234	74680234	T	C	het	37.64	15
1	74680235	74680235	G	A	exonic	Ttll4	.	nonsynonymous SNV	Ttll4:NM_001014974:exon3:c.G1244A:p.S415N	.	het	.	1	74680235	74680235	G	A	het	37.64	15
1	74855468	74855468	G	T	exonic	Cdk5r2	.	nonsynonymous SNV	Cdk5r2:NM_009872:exon1:c.C371T:p.P124L	.	het	.	1	74855468	74855468	G	T	het	37.64	12
1	74855483	74855483	A	T	exonic	Cdk5r2	.	nonsynonymous SNV	Cdk5r2:NM_009872:exon1:c.C386T:p.P129L	.	het	.	1	74855483	74855483	A	T	het	181.64	12
1	74855486	74855486	T	A	exonic	Cdk5r2	.	nonsynonymous SNV	Cdk5r2:NM_009872:exon1:c.C389A:p.T130K	.	het	.	1	74855486	74855486	T	A	het	181.64	12
1	74905914	74905914	A	G	exonic	Cfap65	.	nonsynonymous SNV	Cfap65:NM_001039495:exon26:c.G4348C:p.D1450H	.	het	.	1	74905914	74905914	A	G	het	75.64	13
1	75129481	75129481	G	A	exonic	Slc23a3	.	nonsynonymous SNV	Slc23a3:NM_194333:exon8:c.G1093T:p.G365C	.	het	.	1	75129481	75129481	G	A	het	151.64	22
1	75129625	75129625	G	A	exonic	Slc23a3	.	nonsynonymous SNV	Slc23a3:NM_194333:exon8:c.C949T:p.P317S	.	het	.	1	75129625	75129625	G	A	het	90.64	19
1	75182974	75182974	G	A	exonic	Atg9a	.	nonsynonymous SNV	Atg9a:NM_001003917:exon14:c.C2288T:p.P763L,Atg9a:NM_001288612:exon14:c.C2288T:p.P763L,Atg9a:NM_001288613:exon14:c.C1634T:p.P545L	.	het	.	1	75182974	75182974	G	A	het	102.64	26
1	75217242	75217242	0	G	exonic	Tuba4a	.	nonsynonymous SNV	Tuba4a:NM_009447:exon2:c.G196C:p.V66L	.	het	.	1	75217242	75217242	-	G	het	46.60	12
1	75217271	75217271	G	A	exonic	Tuba4a	.	nonsynonymous SNV	Tuba4a:NM_009447:exon2:c.C167T:p.T56I	.	het	.	1	75217271	75217271	G	A	het	47.64	12
1	75217307	75217307	C	T	exonic	Tuba4a	.	nonsynonymous SNV	Tuba4a:NM_009447:exon2:c.G131A:p.G44E	.	het	.	1	75217307	75217307	C	T	het	44.64	10
1	75309318	75309318	G	A	exonic	Dnpep	.	nonsynonymous SNV	Dnpep:NM_001110831:exon14:c.A1358T:p.Q453L,Dnpep:NM_016878:exon14:c.A1352T:p.Q451L	.	het	.	1	75309318	75309318	G	A	het	262.64	15
1	75309465	75309465	G	A	exonic	Dnpep	.	nonsynonymous SNV	Dnpep:NM_001110831:exon14:c.A1211T:p.D404V,Dnpep:NM_016878:exon14:c.A1205T:p.D402V	.	het	.	1	75309465	75309465	G	A	het	124.64	16
1	75388366	75388366	T	A	exonic	Speg	.	nonsynonymous SNV	Speg:NM_007463:exon4:c.C1390A:p.P464T,Speg:NM_001085371:exon5:c.C1072A:p.P358T	.	het	.	1	75388366	75388366	T	A	het	379.64	21
1	75388370	75388370	G	A	exonic	Speg	.	nonsynonymous SNV	Speg:NM_007463:exon4:c.G1394A:p.R465Q,Speg:NM_001085371:exon5:c.G1076A:p.R359Q	.	het	.	1	75388370	75388370	G	A	het	379.64	21
1	75388708	75388708	A	G	exonic	Speg	.	nonsynonymous SNV	Speg:NM_007463:exon4:c.A1732G:p.S578G,Speg:NM_001085371:exon5:c.A1414G:p.S472G	.	het	.	1	75388708	75388708	A	G	het	103.64	38
1	75388712	75388712	G	T	exonic	Speg	.	nonsynonymous SNV	Speg:NM_007463:exon4:c.G1736T:p.R579I,Speg:NM_001085371:exon5:c.G1418T:p.R473I	.	het	.	1	75388712	75388712	G	T	het	103.64	38
1	75388751	75388751	T	G	exonic	Speg	.	nonsynonymous SNV	Speg:NM_007463:exon4:c.A1775G:p.Q592R,Speg:NM_001085371:exon5:c.A1457G:p.Q486R	.	het	.	1	75388751	75388751	T	G	het	520.64	34
1	75388762	75388762	G	C	exonic	Speg	.	nonsynonymous SNV	Speg:NM_007463:exon4:c.A1786C:p.K596Q,Speg:NM_001085371:exon5:c.A1468C:p.K490Q	.	het	.	1	75388762	75388762	G	C	het	226.64	27
1	75388780	75388780	C	G	exonic	Speg	.	nonsynonymous SNV	Speg:NM_007463:exon4:c.C1804G:p.P602A,Speg:NM_001085371:exon5:c.C1486G:p.P496A	.	het	.	1	75388780	75388780	C	G	het	55.64	24
1	75388783	75388783	G	A	exonic	Speg	.	nonsynonymous SNV	Speg:NM_007463:exon4:c.C1807A:p.L603I,Speg:NM_001085371:exon5:c.C1489A:p.L497I	.	het	.	1	75388783	75388783	G	A	het	55.64	24
1	75388784	75388784	T	C	exonic	Speg	.	nonsynonymous SNV	Speg:NM_007463:exon4:c.T1808C:p.L603P,Speg:NM_001085371:exon5:c.T1490C:p.L497P	.	het	.	1	75388784	75388784	T	C	het	55.64	24
1	75389043	75389043	A	G	exonic	Speg	.	nonsynonymous SNV	Speg:NM_007463:exon4:c.C2067G:p.D689E,Speg:NM_001085371:exon5:c.C1749G:p.D583E	.	het	.	1	75389043	75389043	A	G	het	120.64	27
1	75389071	75389071	C	A	exonic	Speg	.	nonsynonymous SNV	Speg:NM_007463:exon4:c.G2095A:p.G699S,Speg:NM_001085371:exon5:c.G1777A:p.G593S	.	het	.	1	75389071	75389071	C	A	het	58.64	23
1	75389081	75389081	G	A	exonic	Speg	.	nonsynonymous SNV	Speg:NM_007463:exon4:c.C2105A:p.A702D,Speg:NM_001085371:exon5:c.C1787A:p.A596D	.	het	.	1	75389081	75389081	G	A	het	52.64	25
1	78538003	78538003	G	A	exonic	Mogat1	.	nonsynonymous SNV	Mogat1:NM_026713:exon7:c.C913A:p.L305M	.	het	.	1	78538003	78538003	G	A	het	72.64	10
1	78701331	78701331	C	T	exonic	Acsl3	.	nonsynonymous SNV	Acsl3:NM_001136222:exon11:c.G1147T:p.V383L,Acsl3:NM_001033606:exon12:c.G1603T:p.V535L,Acsl3:NM_028817:exon13:c.G1603T:p.V535L	.	het	.	1	78701331	78701331	C	T	het	88.64	13
1	78701332	78701332	A	G	exonic	Acsl3	.	nonsynonymous SNV	Acsl3:NM_001136222:exon11:c.T1148G:p.V383G,Acsl3:NM_001033606:exon12:c.T1604G:p.V535G,Acsl3:NM_028817:exon13:c.T1604G:p.V535G	.	het	.	1	78701332	78701332	A	G	het	88.64	13
1	80200283	80200283	C	T	exonic	Fam124b	.	nonsynonymous SNV	Fam124b:NM_173425:exon2:c.C998A:p.A333E	.	het	.	1	80200283	80200283	C	T	het	37.64	11
1	80665171	80665171	T	C	exonic	Dock10	.	nonsynonymous SNV	Dock10:NM_001285927:exon1:c.T25G:p.F9V	.	hom	.	1	80665171	80665171	T	C	hom	459.06	12
1	82493597	82493597	T	C	exonic	Col4a4	.	nonsynonymous SNV	Col4a4:NM_007735:exon27:c.T2036G:p.L679R	.	het	.	1	82493597	82493597	T	C	het	178.64	13
1	83276084	83276084	A	T	exonic	Sphkap	.	nonsynonymous SNV	Sphkap:NM_172430:exon7:c.G3943A:p.A1315T,Sphkap:NM_001356547:exon8:c.G4018A:p.A1340T	.	het	.	1	83276084	83276084	A	T	het	21.64	19
1	84896606	84896606	G	A	exonic	Fbxo36	.	nonsynonymous SNV	Fbxo36:NM_025386:exon3:c.T322A:p.Y108N	.	het	.	1	84896606	84896606	G	A	het	22.64	20
1	84896610	84896610	A	G	exonic	Fbxo36	.	nonsynonymous SNV	Fbxo36:NM_025386:exon3:c.T326G:p.L109R	.	het	.	1	84896610	84896610	A	G	het	47.64	20
1	84896616	84896616	T	C	exonic	Fbxo36	.	nonsynonymous SNV	Fbxo36:NM_025386:exon3:c.T332C:p.L111P	.	het	.	1	84896616	84896616	T	C	het	82.64	15
1	84896622	84896622	C	T	exonic	Fbxo36	.	nonsynonymous SNV	Fbxo36:NM_025386:exon3:c.A338T:p.D113V	.	het	.	1	84896622	84896622	C	T	het	40.64	14
1	85632508	85632508	A	G	exonic	Sp140	.	nonsynonymous SNV	Sp140:NM_001013817:exon10:c.A860G:p.N287S	.	het	.	1	85632508	85632508	A	G	het	40.64	14
1	85632516	85632516	G	A	exonic	Sp140	.	nonsynonymous SNV	Sp140:NM_001013817:exon10:c.T868A:p.W290R	.	het	.	1	85632516	85632516	G	A	het	40.64	14
1	85666926	85666926	T	C	exonic	Sp100	.	nonsynonymous SNV	Sp100:NM_001313712:exon6:c.A506C:p.N169T,Sp100:NM_001313713:exon6:c.A506C:p.N169T,Sp100:NM_001313714:exon6:c.A506C:p.N169T,Sp100:NM_001372231:exon6:c.A506C:p.N169T,Sp100:NM_001372232:exon6:c.A506C:p.N169T,Sp100:NM_013673:exon6:c.A506C:p.N169T	.	het	.	1	85666926	85666926	T	C	het	158.64	37
1	86102511	86102511	A	G	exonic	Htr2b	.	nonsynonymous SNV	Htr2b:NM_008311:exon3:c.T461C:p.I154T	.	het	.	1	86102511	86102511	A	G	het	525.64	16
1	86102544	86102544	C	T	exonic	Htr2b	.	nonsynonymous SNV	Htr2b:NM_008311:exon3:c.T428A:p.M143K	.	het	.	1	86102544	86102544	C	T	het	163.64	18
1	86102545	86102545	A	G	exonic	Htr2b	.	nonsynonymous SNV	Htr2b:NM_008311:exon3:c.A427C:p.M143L	.	het	.	1	86102545	86102545	A	G	het	163.64	18
1	86102547	86102547	0	G	exonic	Htr2b	.	nonsynonymous SNV	Htr2b:NM_008311:exon3:c.T425C:p.I142T	.	het	.	1	86102547	86102547	-	G	het	163.60	18
1	86102590	86102590	T	A	exonic	Htr2b	.	nonsynonymous SNV	Htr2b:NM_008311:exon3:c.C382T:p.P128S	.	het	.	1	86102590	86102590	T	A	het	235.64	14
1	86196322	86196322	T	A	exonic	Armc9	.	nonsynonymous SNV	Armc9:NM_001310702:exon14:c.G1217A:p.R406H,Armc9:NM_027456:exon14:c.G1217A:p.R406H,Armc9:NM_030184:exon14:c.G1217A:p.R406H	.	het	.	1	86196322	86196322	T	A	het	277.64	25
1	86196337	86196337	0	C	exonic	Armc9	.	nonsynonymous SNV	Armc9:NM_001310702:exon14:c.A1232C:p.Q411P,Armc9:NM_027456:exon14:c.A1232C:p.Q411P,Armc9:NM_030184:exon14:c.A1232C:p.Q411P	.	het	.	1	86196337	86196337	-	C	het	225.60	20
1	86196339	86196339	T	G	exonic	Armc9	.	nonsynonymous SNV	Armc9:NM_001310702:exon14:c.A1234G:p.N412D,Armc9:NM_027456:exon14:c.A1234G:p.N412D,Armc9:NM_030184:exon14:c.A1234G:p.N412D	.	het	.	1	86196339	86196339	T	G	het	192.64	19
1	86257300	86257300	A	G	exonic	Armc9	.	nonsynonymous SNV	Armc9:NM_001310702:exon22:c.C2072G:p.A691G,Armc9:NM_030184:exon22:c.C2072G:p.A691G	.	het	.	1	86257300	86257300	A	G	het	316.64	12
1	86257319	86257319	T	C	exonic	Armc9	.	nonsynonymous SNV	Armc9:NM_001310702:exon22:c.A2091C:p.K697N,Armc9:NM_030184:exon22:c.A2091C:p.K697N	.	het	.	1	86257319	86257319	T	C	het	316.64	12
1	86386431	86386431	T	C	exonic	Nmur1	.	nonsynonymous SNV	Nmur1:NM_010341:exon2:c.T1112G:p.L371W,Nmur1:NM_001319227:exon3:c.T1181G:p.L394W	.	het	.	1	86386431	86386431	T	C	het	113.64	11
1	87264601	87264601	T	C	exonic	Efhd1	.	nonsynonymous SNV	Efhd1:NM_028889:exon1:c.G152C:p.S51T	.	het	.	1	87264601	87264601	T	C	het	58.64	23
1	87264602	87264602	G	A	exonic	Efhd1	.	nonsynonymous SNV	Efhd1:NM_028889:exon1:c.C153A:p.S51R	.	het	.	1	87264602	87264602	G	A	het	58.64	23
1	87264609	87264609	A	G	exonic	Efhd1	.	nonsynonymous SNV	Efhd1:NM_028889:exon1:c.T160G:p.S54A	.	het	.	1	87264609	87264609	A	G	het	58.64	23
1	87264631	87264631	T	C	exonic	Efhd1	.	nonsynonymous SNV	Efhd1:NM_028889:exon1:c.G182C:p.S61T	.	het	.	1	87264631	87264631	T	C	het	109.64	25
1	87831942	87831942	T	G	exonic	Sag	.	nonsynonymous SNV	Sag:NM_009118:exon11:c.A901G:p.K301E	.	het	.	1	87831942	87831942	T	G	het	20.64	15
1	87938376	87938376	C	A	exonic	Dgkd	.	nonsynonymous SNV	Dgkd:NM_177646:exon26:c.G3130A:p.V1044M	.	het	.	1	87938376	87938376	C	A	het	64.64	21
1	87938406	87938406	A	G	exonic	Dgkd	.	nonsynonymous SNV	Dgkd:NM_177646:exon26:c.A3160G:p.T1054A	.	hom	.	1	87938406	87938406	A	G	hom	718.06	22
1	88088126	88088126	G	A	exonic	Ugt1a8	.	nonsynonymous SNV	Ugt1a8:NM_001378375:exon1:c.G260A:p.S87N	.	hom	.	1	88088126	88088126	G	A	hom	338.06	11
1	88088627	88088627	A	C	exonic	Ugt1a8	.	nonsynonymous SNV	Ugt1a8:NM_001378375:exon1:c.G761C:p.R254P	.	het	.	1	88088627	88088627	A	C	het	79.64	16
1	88088671	88088671	T	G	exonic	Ugt1a8	.	nonsynonymous SNV	Ugt1a8:NM_001378375:exon1:c.A805G:p.M269V	.	het	.	1	88088671	88088671	T	G	het	30.64	20
1	88138965	88138965	T	A	exonic	Ugt1a6a	.	nonsynonymous SNV	Ugt1a6a:NM_145079:exon2:c.C492A:p.N164K	.	het	.	1	88138965	88138965	T	A	het	28.64	23
1	88139096	88139096	G	A	exonic	Ugt1a6a	.	nonsynonymous SNV	Ugt1a6a:NM_145079:exon2:c.G623A:p.R208Q	.	het	.	1	88139096	88139096	G	A	het	64.64	21
1	88139109	88139109	T	G	exonic	Ugt1a6a	.	nonsynonymous SNV	Ugt1a6a:NM_145079:exon2:c.C636G:p.F212L	.	het	.	1	88139109	88139109	T	G	het	109.64	21
1	88139119	88139119	A	G	exonic	Ugt1a6a	.	nonsynonymous SNV	Ugt1a6a:NM_145079:exon2:c.A646G:p.I216V	.	het	.	1	88139119	88139119	A	G	het	72.64	20
1	88166538	88166538	G	A	exonic	Ugt1a5	.	nonsynonymous SNV	Ugt1a5:NM_201643:exon1:c.C487A:p.P163T	.	het	.	1	88166538	88166538	G	A	het	113.64	14
1	88166728	88166728	A	C	exonic	Ugt1a5	.	nonsynonymous SNV	Ugt1a5:NM_201643:exon1:c.A677C:p.Y226S	.	het	.	1	88166728	88166728	A	C	het	92.64	11
1	88166856	88166856	T	C	exonic	Ugt1a5	.	nonsynonymous SNV	Ugt1a5:NM_201643:exon1:c.G805C:p.V269L	.	het	.	1	88166856	88166856	T	C	het	293.67	10
1	88200832	88200832	C	T	exonic	Ugt1a2	.	nonsynonymous SNV	Ugt1a2:NM_013701:exon1:c.G196T:p.V66L	.	het	.	1	88200832	88200832	C	T	het	53.64	19
1	88200936	88200936	A	G	exonic	Ugt1a2	.	nonsynonymous SNV	Ugt1a2:NM_013701:exon1:c.T300G:p.F100L	.	het	.	1	88200936	88200936	A	G	het	281.64	12
1	88200989	88200989	0	G	exonic	Ugt1a2	.	nonsynonymous SNV	Ugt1a2:NM_013701:exon1:c.A353G:p.N118S	.	het	.	1	88200989	88200989	-	G	het	123.60	16
1	88200992	88200992	A	G	exonic	Ugt1a2	.	nonsynonymous SNV	Ugt1a2:NM_013701:exon1:c.T356G:p.F119C	.	het	.	1	88200992	88200992	A	G	het	168.64	16
1	88200997	88200997	G	A	exonic	Ugt1a2	.	nonsynonymous SNV	Ugt1a2:NM_013701:exon1:c.G361A:p.D121N	.	het	.	1	88200997	88200997	G	A	het	375.64	14
1	88201079	88201079	A	G	exonic	Ugt1a2	.	nonsynonymous SNV	Ugt1a2:NM_013701:exon1:c.T443G:p.I148S	.	het	.	1	88201079	88201079	A	G	het	277.64	10
1	88201240	88201240	C	T	exonic	Ugt1a2	.	nonsynonymous SNV	Ugt1a2:NM_013701:exon1:c.G604T:p.D202Y	.	het	.	1	88201240	88201240	C	T	het	78.64	12
1	88212375	88212375	T	A	exonic	Ugt1a1	.	nonsynonymous SNV	Ugt1a1:NM_201645:exon1:c.T374A:p.L125H	.	het	.	1	88212375	88212375	T	A	het	150.64	10
1	88212403	88212403	A	G	exonic	Ugt1a1	.	nonsynonymous SNV	Ugt1a1:NM_201645:exon1:c.C402G:p.H134Q	.	het	.	1	88212403	88212403	A	G	het	329.65	10
1	89843077	89843077	C	T	exonic	Agap1	.	nonsynonymous SNV	Agap1:NM_001037136:exon15:c.A1789T:p.I597F,Agap1:NM_178119:exon16:c.A1948T:p.I650F	.	het	.	1	89843077	89843077	C	T	het	34.64	16
1	89843079	89843079	A	G	exonic	Agap1	.	nonsynonymous SNV	Agap1:NM_001037136:exon15:c.C1791G:p.I597M,Agap1:NM_178119:exon16:c.C1950G:p.I650M	.	het	.	1	89843079	89843079	A	G	het	34.64	16
1	90808055	90808055	A	C	exonic	Col6a3	.	nonsynonymous SNV	Col6a3:NM_001243009:exon6:c.T1871G:p.V624G,Col6a3:NM_001243008:exon9:c.T3692G:p.V1231G	.	hom	.	1	90808055	90808055	A	C	hom	624.06	18
1	91115478	91115478	A	G	exonic	Lrrfip1	.	nonsynonymous SNV	Lrrfip1:NM_001111311:exon8:c.A1604G:p.Q535R	.	hom	.	1	91115478	91115478	A	G	hom	394.06	10
1	91945901	91945901	A	G	exonic	Hdac4	.	nonsynonymous SNV	Hdac4:NM_207225:exon24:c.A2963C:p.E988A	.	het	.	1	91945901	91945901	A	G	het	226.64	12
1	91945904	91945904	0	G	exonic	Hdac4	.	nonsynonymous SNV	Hdac4:NM_207225:exon24:c.A2960C:p.N987T	.	het	.	1	91945904	91945904	-	G	het	226.60	12
1	91945943	91945943	C	T	exonic	Hdac4	.	nonsynonymous SNV	Hdac4:NM_207225:exon24:c.G2921A:p.C974Y	.	het	.	1	91945943	91945943	C	T	het	220.64	14
1	91945947	91945947	T	C	exonic	Hdac4	.	nonsynonymous SNV	Hdac4:NM_207225:exon24:c.A2917G:p.I973V	.	het	.	1	91945947	91945947	T	C	het	120.64	14
1	91945950	91945950	G	A	exonic	Hdac4	.	nonsynonymous SNV	Hdac4:NM_207225:exon24:c.G2914T:p.A972S	.	het	.	1	91945950	91945950	G	A	het	120.64	14
1	91945969	91945969	A	G	exonic	Hdac4	.	nonsynonymous SNV	Hdac4:NM_207225:exon24:c.G2895C:p.E965D	.	het	.	1	91945969	91945969	A	G	het	63.64	17
1	93019042	93019042	A	C	exonic	Kif1a	.	nonsynonymous SNV	Kif1a:NM_001110315:exon46:c.A4937G:p.E1646G,Kif1a:NM_001294150:exon46:c.A4964G:p.E1655G,Kif1a:NM_001294149:exon47:c.A4964G:p.E1655G,Kif1a:NM_008440:exon47:c.A4961G:p.E1654G,Kif1a:NM_001368847:exon48:c.A4988G:p.E1663G	.	het	.	1	93019042	93019042	A	C	het	61.64	22
1	93054288	93054288	T	G	exonic	Kif1a	.	nonsynonymous SNV	Kif1a:NM_001110315:exon24:c.A2389C:p.T797P,Kif1a:NM_001294149:exon24:c.A2389C:p.T797P,Kif1a:NM_001294150:exon24:c.A2416C:p.T806P,Kif1a:NM_008440:exon24:c.A2389C:p.T797P,Kif1a:NM_001368847:exon25:c.A2416C:p.T806P	.	het	.	1	93054288	93054288	T	G	het	907.64	25
1	93054296	93054296	T	C	exonic	Kif1a	.	nonsynonymous SNV	Kif1a:NM_001110315:exon24:c.A2381G:p.N794S,Kif1a:NM_001294149:exon24:c.A2381G:p.N794S,Kif1a:NM_001294150:exon24:c.A2408G:p.N803S,Kif1a:NM_008440:exon24:c.A2381G:p.N794S,Kif1a:NM_001368847:exon25:c.A2408G:p.N803S	.	het	.	1	93054296	93054296	T	C	het	182.64	13
1	93261661	93261661	A	C	exonic	Sned1	.	nonsynonymous SNV	Sned1:NM_172463:exon5:c.T818C:p.L273P	.	het	.	1	93261661	93261661	A	C	het	278.64	26
1	93261677	93261677	A	G	exonic	Sned1	.	nonsynonymous SNV	Sned1:NM_172463:exon5:c.C834G:p.C278W	.	het	.	1	93261677	93261677	A	G	het	769.64	34
1	93310781	93310781	G	A	exonic	Pask	.	nonsynonymous SNV	Pask:NM_080850:exon17:c.G3981T:p.R1327S	.	het	.	1	93310781	93310781	G	A	het	61.64	22
1	93310807	93310807	T	A	exonic	Pask	.	nonsynonymous SNV	Pask:NM_080850:exon17:c.A3955T:p.S1319C	.	het	.	1	93310807	93310807	T	A	het	163.64	18
1	93310810	93310810	A	G	exonic	Pask	.	nonsynonymous SNV	Pask:NM_080850:exon17:c.G3952C:p.A1318P	.	het	.	1	93310810	93310810	A	G	het	166.64	17
1	93310857	93310857	T	C	exonic	Pask	.	nonsynonymous SNV	Pask:NM_080850:exon17:c.T3905G:p.L1302W	.	het	.	1	93310857	93310857	T	C	het	31.64	17
1	93310858	93310858	C	T	exonic	Pask	.	nonsynonymous SNV	Pask:NM_080850:exon17:c.T3904A:p.L1302M	.	het	.	1	93310858	93310858	C	T	het	31.64	17
1	93310863	93310863	C	T	exonic	Pask	.	nonsynonymous SNV	Pask:NM_080850:exon17:c.C3899A:p.T1300N	.	het	.	1	93310863	93310863	C	T	het	31.64	17
1	93310866	93310866	A	G	exonic	Pask	.	nonsynonymous SNV	Pask:NM_080850:exon17:c.G3896C:p.R1299P	.	het	.	1	93310866	93310866	A	G	het	31.64	17
1	93320789	93320789	T	C	exonic	Pask	.	nonsynonymous SNV	Pask:NM_080850:exon10:c.A2888G:p.D963G	.	het	.	1	93320789	93320789	T	C	het	43.64	28
1	93320813	93320813	A	G	exonic	Pask	.	nonsynonymous SNV	Pask:NM_080850:exon10:c.A2864C:p.Y955S	.	het	.	1	93320813	93320813	A	G	het	351.64	32
1	93567449	93567449	T	A	exonic	Farp2	.	nonsynonymous SNV	Farp2:NM_145519:exon6:c.T443A:p.L148H	.	het	.	1	93567449	93567449	T	A	het	133.64	28
1	93695085	93695085	C	A	exonic	Bok	.	nonsynonymous SNV	Bok:NM_016778:exon5:c.C565A:p.H189N	.	het	.	1	93695085	93695085	C	A	het	64.64	12
1	94022552	94022552	C	T	exonic	Neu4	.	nonsynonymous SNV	Neu4:NM_173772:exon2:c.G163T:p.V55L,Neu4:NM_001310769:exon3:c.G232T:p.V78L	.	het	.	1	94022552	94022552	C	T	het	33.64	23
1	94024629	94024629	T	G	exonic	Neu4	.	nonsynonymous SNV	Neu4:NM_173772:exon4:c.A650G:p.N217S,Neu4:NM_001310769:exon5:c.A719G:p.N240S	.	het	.	1	94024629	94024629	T	G	het	103.64	38
1	94024632	94024632	T	C	exonic	Neu4	.	nonsynonymous SNV	Neu4:NM_173772:exon4:c.T653C:p.L218P,Neu4:NM_001310769:exon5:c.T722C:p.L241P	.	het	.	1	94024632	94024632	T	C	het	106.64	37
1	94024769	94024769	T	G	exonic	Neu4	.	nonsynonymous SNV	Neu4:NM_173772:exon4:c.A790G:p.T264A,Neu4:NM_001310769:exon5:c.A859G:p.T287A	.	het	.	1	94024769	94024769	T	G	het	210.64	59
1	94025108	94025108	T	A	exonic	Neu4	.	nonsynonymous SNV	Neu4:NM_173772:exon4:c.C1129A:p.P377T,Neu4:NM_001310769:exon5:c.C1198A:p.P400T	.	het	.	1	94025108	94025108	T	A	het	92.64	60
1	97734017	97734017	T	G	exonic	Ppip5k2	.	nonsynonymous SNV	Ppip5k2:NM_173760:exon19:c.G2173C:p.D725H	.	het	.	1	97734017	97734017	T	G	het	138.64	33
1	98490519	98490519	A	G	exonic	Slco6d1	.	nonsynonymous SNV	Slco6d1:NM_001164233:exon9:c.A1429G:p.T477A,Slco6d1:NM_027584:exon9:c.A1429G:p.T477A	.	het	.	1	98490519	98490519	A	G	het	97.64	10
1	98490595	98490595	A	C	exonic	Slco6d1	.	nonsynonymous SNV	Slco6d1:NM_001164233:exon9:c.A1505C:p.Y502S,Slco6d1:NM_027584:exon9:c.A1505C:p.Y502S	.	het	.	1	98490595	98490595	A	C	het	88.64	13
1	104953970	104953970	C	G	exonic	Cdh20	.	nonsynonymous SNV	Cdh20:NM_011800:exon7:c.C1159G:p.P387A	.	het	.	1	104953970	104953970	C	G	het	53.64	16
1	105657812	105657812	0	T	exonic	Pign	.	nonsynonymous SNV	Pign:NM_013784:exon4:c.T11A:p.F4Y	.	hom	.	1	105657812	105657812	-	T	hom	296.02	11
1	105719467	105719467	T	A	exonic	Relch	.	nonsynonymous SNV	Relch:NM_029349:exon14:c.C1981A:p.L661I,Relch:NM_173187:exon15:c.C2053A:p.L685I	.	het	.	1	105719467	105719467	T	A	het	35.64	10
1	105825030	105825030	T	A	exonic	Tnfrsf11a	.	nonsynonymous SNV	Tnfrsf11a:NM_009399:exon8:c.G764A:p.C255Y	.	het	.	1	105825030	105825030	T	A	het	148.64	16
1	106734609	106734609	0	T	exonic	Kdsr	.	nonsynonymous SNV	Kdsr:NM_001316750:exon8:c.T715A:p.S239T,Kdsr:NM_027534:exon8:c.T715A:p.S239T	.	het	.	1	106734609	106734609	-	T	het	69.60	13
1	107047151	107047151	A	C	exonic	Serpinb3a	.	nonsynonymous SNV	Serpinb3a:NM_009126:exon7:c.C651G:p.N217K	.	hom	.	1	107047151	107047151	A	C	hom	362.06	10
1	107078347	107078347	C	A	exonic	Serpinb3d	.	nonsynonymous SNV	Serpinb3d:NM_201376:exon7:c.A1010T:p.E337V	.	het	.	1	107078347	107078347	C	A	het	427.64	45
1	107078356	107078356	G	C	exonic	Serpinb3d	.	nonsynonymous SNV	Serpinb3d:NM_201376:exon7:c.T1001G:p.V334G	.	het	.	1	107078356	107078356	G	C	het	115.64	34
1	107078358	107078358	C	A	exonic	Serpinb3d	.	nonsynonymous SNV	Serpinb3d:NM_201376:exon7:c.G999T:p.E333D	.	het	.	1	107078358	107078358	C	A	het	115.64	34
1	107078371	107078371	C	G	exonic	Serpinb3d	.	nonsynonymous SNV	Serpinb3d:NM_201376:exon7:c.A986C:p.K329T	.	het	.	1	107078371	107078371	C	G	het	163.64	33
1	107078390	107078390	T	A	exonic	Serpinb3d	.	nonsynonymous SNV	Serpinb3d:NM_201376:exon7:c.G967T:p.V323L	.	het	.	1	107078390	107078390	T	A	het	79.64	31
1	107078396	107078396	C	T	exonic	Serpinb3d	.	nonsynonymous SNV	Serpinb3d:NM_201376:exon7:c.C961A:p.L321I	.	het	.	1	107078396	107078396	C	T	het	79.64	31
1	107078449	107078449	G	A	exonic	Serpinb3d	.	nonsynonymous SNV	Serpinb3d:NM_201376:exon7:c.A908T:p.D303V	.	het	.	1	107078449	107078449	G	A	het	76.64	17
1	107154514	107154514	A	C	exonic	Serpinb3b	.	nonsynonymous SNV	Serpinb3b:NM_198680:exon8:c.A1019G:p.E340G	.	het	.	1	107154514	107154514	A	C	het	93.64	18
1	107154710	107154710	A	C	exonic	Serpinb3b	.	nonsynonymous SNV	Serpinb3b:NM_198680:exon8:c.A823G:p.T275A	.	het	.	1	107154710	107154710	A	C	het	135.64	19
1	107157759	107157759	C	A	exonic	Serpinb3b	.	nonsynonymous SNV	Serpinb3b:NM_198680:exon4:c.A251T:p.K84M	.	het	.	1	107157759	107157759	C	A	het	724.64	129
1	107159686	107159686	T	G	exonic	Serpinb3b	.	nonsynonymous SNV	Serpinb3b:NM_198680:exon2:c.T92C:p.I31T	.	het	.	1	107159686	107159686	T	G	het	247.64	50
1	107159756	107159756	A	T	exonic	Serpinb3b	.	nonsynonymous SNV	Serpinb3b:NM_198680:exon2:c.G22A:p.D8N	.	het	.	1	107159756	107159756	A	T	het	708.64	76
1	110098303	110098303	C	T	exonic	Cdh7	.	nonsynonymous SNV	Cdh7:NM_001316743:exon8:c.G1268T:p.R423I,Cdh7:NM_172853:exon8:c.G1268T:p.R423I,Cdh7:NM_001316744:exon9:c.G1094T:p.R365I	.	het	.	1	110098303	110098303	C	T	het	116.64	13
1	110098341	110098341	A	T	exonic	Cdh7	.	nonsynonymous SNV	Cdh7:NM_001316743:exon8:c.A1306T:p.T436S,Cdh7:NM_172853:exon8:c.A1306T:p.T436S,Cdh7:NM_001316744:exon9:c.A1132T:p.T378S	.	hom	.	1	110098341	110098341	A	T	hom	406.06	10
1	110925156	110925156	G	A	exonic	Cdh19	.	nonsynonymous SNV	Cdh19:NM_001081386:exon7:c.G1048T:p.A350S,Cdh19:NM_001356415:exon8:c.G1048T:p.A350S	.	het	.	1	110925156	110925156	G	A	het	88.64	21
1	110954718	110954718	T	C	exonic	Cdh19	.	nonsynonymous SNV	Cdh19:NM_001081386:exon2:c.C43G:p.L15V,Cdh19:NM_001356415:exon3:c.C43G:p.L15V	.	het	.	1	110954718	110954718	T	C	het	21.64	30
1	110954747	110954747	G	C	exonic	Cdh19	.	nonsynonymous SNV	Cdh19:NM_001081386:exon2:c.T14G:p.F5C,Cdh19:NM_001356415:exon3:c.T14G:p.F5C	.	het	.	1	110954747	110954747	G	C	het	190.64	32
1	111859283	111859283	G	C	exonic	Dsel	.	nonsynonymous SNV	Dsel:NM_001081316:exon2:c.C3521G:p.T1174S	.	het	.	1	111859283	111859283	G	C	het	210.64	16
1	118664913	118664913	G	A	exonic	Tfcp2l1	.	nonsynonymous SNV	Tfcp2l1:NM_023755:exon10:c.G925A:p.A309T	.	het	.	1	118664913	118664913	G	A	het	482.64	20
1	118664919	118664919	C	T	exonic	Tfcp2l1	.	nonsynonymous SNV	Tfcp2l1:NM_023755:exon10:c.A931T:p.I311F	.	het	.	1	118664919	118664919	C	T	het	502.64	25
1	118664920	118664920	G	A	exonic	Tfcp2l1	.	nonsynonymous SNV	Tfcp2l1:NM_023755:exon10:c.T932A:p.I311N	.	het	.	1	118664920	118664920	G	A	het	134.64	25
1	118664926	118664926	T	C	exonic	Tfcp2l1	.	nonsynonymous SNV	Tfcp2l1:NM_023755:exon10:c.A938C:p.D313A	.	het	.	1	118664926	118664926	T	C	het	241.64	27
1	118664934	118664934	A	G	exonic	Tfcp2l1	.	nonsynonymous SNV	Tfcp2l1:NM_023755:exon10:c.C946G:p.Q316E	.	het	.	1	118664934	118664934	A	G	het	180.64	27
1	119554241	119554241	C	A	exonic	Epb41l5	.	nonsynonymous SNV	Epb41l5:NM_145506:exon22:c.A1921T:p.T641S	.	het	.	1	119554241	119554241	C	A	het	167.64	15
1	119682506	119682506	G	A	exonic	Ptpn4	.	nonsynonymous SNV	Ptpn4:NM_019933:exon22:c.A2111T:p.Y704F	.	het	.	1	119682506	119682506	G	A	het	76.64	32
1	119682512	119682512	A	G	exonic	Ptpn4	.	nonsynonymous SNV	Ptpn4:NM_019933:exon22:c.A2105C:p.E702A	.	het	.	1	119682512	119682512	A	G	het	37.64	30
1	119684601	119684601	G	A	exonic	Ptpn4	.	nonsynonymous SNV	Ptpn4:NM_019933:exon20:c.A1846T:p.S616C	.	het	.	1	119684601	119684601	G	A	het	49.64	26
1	121501193	121501193	G	C	exonic	Ccdc93	.	nonsynonymous SNV	Ccdc93:NM_001025156:exon24:c.G1840C:p.G614R,Ccdc93:NM_029955:exon24:c.G1837C:p.G613R	.	het	.	1	121501193	121501193	G	C	het	88.64	17
1	123341116	123341116	C	G	exonic	Dpp10	.	nonsynonymous SNV	Dpp10:NM_199021:exon24:c.G2183C:p.G728A	.	het	.	1	123341116	123341116	C	G	het	52.64	10
1	127937404	127937404	G	A	exonic	Rab3gap1	.	nonsynonymous SNV	Rab3gap1:NM_178690:exon19:c.G2128A:p.E710K	.	het	.	1	127937404	127937404	G	A	het	97.64	10
1	128036487	128036487	A	G	exonic	Zranb3	.	nonsynonymous SNV	Zranb3:NM_001285945:exon5:c.G514C:p.A172P,Zranb3:NM_001357573:exon5:c.G502C:p.A168P,Zranb3:NM_027678:exon5:c.G502C:p.A168P	.	het	.	1	128036487	128036487	A	G	het	118.64	11
1	128153258	128153258	C	T	exonic	R3hdm1	.	nonsynonymous SNV	R3hdm1:NM_001357482:exon3:c.A30T:p.K10N,R3hdm1:NM_181750:exon3:c.A30T:p.K10N	.	het	.	1	128153258	128153258	C	T	het	49.64	41
1	128153263	128153263	C	T	exonic	R3hdm1	.	nonsynonymous SNV	R3hdm1:NM_001357482:exon3:c.A35T:p.E12V,R3hdm1:NM_181750:exon3:c.A35T:p.E12V	.	het	.	1	128153263	128153263	C	T	het	46.64	42
1	128193518	128193518	A	T	exonic	R3hdm1	.	nonsynonymous SNV	R3hdm1:NM_001357482:exon18:c.G1787T:p.G596V,R3hdm1:NM_181750:exon18:c.G1787T:p.G596V	.	het	.	1	128193518	128193518	A	T	het	61.64	18
1	128193677	128193677	A	G	exonic	R3hdm1	.	nonsynonymous SNV	R3hdm1:NM_001357482:exon18:c.C1946G:p.A649G,R3hdm1:NM_181750:exon18:c.C1946G:p.A649G	.	het	.	1	128193677	128193677	A	G	het	105.64	29
1	128193755	128193755	C	T	exonic	R3hdm1	.	nonsynonymous SNV	R3hdm1:NM_001357482:exon18:c.A2024T:p.Q675L,R3hdm1:NM_181750:exon18:c.A2024T:p.Q675L	.	het	.	1	128193755	128193755	C	T	het	82.64	30
1	128301317	128301317	T	C	exonic	Lct	.	nonsynonymous SNV	Lct:NM_001081078:exon8:c.A2438G:p.Y813C	.	hom	.	1	128301317	128301317	T	C	hom	422.06	11
1	128304323	128304323	A	G	exonic	Lct	.	nonsynonymous SNV	Lct:NM_001081078:exon7:c.G1788C:p.Q596H	.	het	.	1	128304323	128304323	A	G	het	59.64	14
1	128311561	128311561	C	T	exonic	Lct	.	nonsynonymous SNV	Lct:NM_001081078:exon4:c.C887A:p.A296D	.	het	.	1	128311561	128311561	C	T	het	356.65	10
1	128339402	128339402	G	T	exonic	Mcm6	.	nonsynonymous SNV	Mcm6:NM_001313695:exon12:c.C1703A:p.S568Y,Mcm6:NM_008567:exon12:c.C1703A:p.S568Y	.	het	.	1	128339402	128339402	G	T	het	154.71	10
1	130582902	130582902	G	T	exonic	Zp3r	.	nonsynonymous SNV	Zp3r:NM_009581:exon10:c.T1277A:p.F426Y	.	het	.	1	130582902	130582902	G	T	het	178.64	13
1	130706436	130706436	C	T	exonic	Pfkfb2	.	nonsynonymous SNV	Pfkfb2:NM_001162416:exon6:c.C503A:p.A168D,Pfkfb2:NM_001368843:exon7:c.C503A:p.A168D,Pfkfb2:NM_008825:exon7:c.C503A:p.A168D,Pfkfb2:NM_001162415:exon8:c.C503A:p.A168D	.	het	.	1	130706436	130706436	C	T	het	205.64	49
1	130706443	130706443	C	A	exonic	Pfkfb2	.	nonsynonymous SNV	Pfkfb2:NM_001162416:exon6:c.A496T:p.I166F,Pfkfb2:NM_001368843:exon7:c.A496T:p.I166F,Pfkfb2:NM_008825:exon7:c.A496T:p.I166F,Pfkfb2:NM_001162415:exon8:c.A496T:p.I166F	.	het	.	1	130706443	130706443	C	A	het	189.64	54
1	130706461	130706461	A	T	exonic	Pfkfb2	.	nonsynonymous SNV	Pfkfb2:NM_001162416:exon6:c.T478A:p.C160S,Pfkfb2:NM_001368843:exon7:c.T478A:p.C160S,Pfkfb2:NM_008825:exon7:c.T478A:p.C160S,Pfkfb2:NM_001162415:exon8:c.T478A:p.C160S	.	het	.	1	130706461	130706461	A	T	het	265.64	60
1	130706479	130706479	C	T	exonic	Pfkfb2	.	nonsynonymous SNV	Pfkfb2:NM_001162416:exon6:c.T460A:p.F154I,Pfkfb2:NM_001368843:exon7:c.T460A:p.F154I,Pfkfb2:NM_008825:exon7:c.T460A:p.F154I,Pfkfb2:NM_001162415:exon8:c.T460A:p.F154I	.	het	.	1	130706479	130706479	C	T	het	536.64	86
1	130841835	130841835	A	C	exonic	Pigr	.	nonsynonymous SNV	Pigr:NM_011082:exon3:c.A382C:p.S128R	.	het	.	1	130841835	130841835	A	C	het	81.64	10
1	130849101	130849101	G	C	exonic	Pigr	.	nonsynonymous SNV	Pigr:NM_011082:exon8:c.G2012C:p.R671P	.	het	.	1	130849101	130849101	G	C	het	136.64	25
1	131538864	131538864	G	T	exonic	Fam72a	.	nonsynonymous SNV	Fam72a:NM_175382:exon4:c.C385T:p.P129S	.	hom	.	1	131538864	131538864	G	T	hom	466.06	12
1	131802745	131802745	C	T	exonic	Pm20d1	.	nonsynonymous SNV	Pm20d1:NM_001357478:exon6:c.C736T:p.L246F,Pm20d1:NM_178079:exon6:c.C736T:p.L246F	.	het	.	1	131802745	131802745	C	T	het	161.64	13
1	131802749	131802749	G	C	exonic	Pm20d1	.	nonsynonymous SNV	Pm20d1:NM_001357478:exon6:c.A740C:p.D247A,Pm20d1:NM_178079:exon6:c.A740C:p.D247A	.	het	.	1	131802749	131802749	G	C	het	163.64	13
1	131840895	131840895	G	A	exonic	Slc41a1	.	nonsynonymous SNV	Slc41a1:NM_173865:exon5:c.C590A:p.A197D	.	het	.	1	131840895	131840895	G	A	het	110.64	30
1	131840958	131840958	G	A	exonic	Slc41a1	.	nonsynonymous SNV	Slc41a1:NM_173865:exon5:c.C653A:p.A218D	.	het	.	1	131840958	131840958	G	A	het	98.64	19
1	132357516	132357516	A	G	exonic	Tmcc2	.	nonsynonymous SNV	Tmcc2:NM_001311108:exon4:c.T1406C:p.L469P,Tmcc2:NM_001311107:exon5:c.T1877C:p.L626P,Tmcc2:NM_178874:exon5:c.T2111C:p.L704P	.	hom	.	1	132357516	132357516	A	G	hom	879.06	22
1	133081010	133081010	C	G	exonic	Pik3c2b	.	nonsynonymous SNV	Pik3c2b:NM_001099276:exon12:c.C1990G:p.L664V	.	hom	.	1	133081010	133081010	C	G	hom	732.06	19
1	133270110	133270110	T	C	exonic	Plekha6	.	nonsynonymous SNV	Plekha6:NM_001160268:exon7:c.G492C:p.E164D,Plekha6:NM_182930:exon7:c.G432C:p.E144D	.	hom	.	1	133270110	133270110	T	C	hom	384.06	10
1	133385468	133385468	C	T	exonic	Sox13	.	nonsynonymous SNV	Sox13:NM_011439:exon12:c.T1349A:p.L450H	.	het	.	1	133385468	133385468	C	T	het	37.64	15
1	133626895	133626895	C	T	exonic	Zc3h11a	.	nonsynonymous SNV	Zc3h11a:NM_001357228:exon12:c.C1346A:p.T449K,Zc3h11a:NM_144530:exon12:c.C1346A:p.T449K,Zc3h11a:NM_001276767:exon13:c.C1346A:p.T449K	.	het	.	1	133626895	133626895	C	T	het	28.64	18
1	133626912	133626912	A	G	exonic	Zc3h11a	.	nonsynonymous SNV	Zc3h11a:NM_001357228:exon12:c.G1329C:p.Q443H,Zc3h11a:NM_144530:exon12:c.G1329C:p.Q443H,Zc3h11a:NM_001276767:exon13:c.G1329C:p.Q443H	.	het	.	1	133626912	133626912	A	G	het	247.64	20
1	133626916	133626916	T	C	exonic	Zc3h11a	.	nonsynonymous SNV	Zc3h11a:NM_001357228:exon12:c.T1325G:p.M442R,Zc3h11a:NM_144530:exon12:c.T1325G:p.M442R,Zc3h11a:NM_001276767:exon13:c.T1325G:p.M442R	.	het	.	1	133626916	133626916	T	C	het	247.64	20
1	133626965	133626965	A	T	exonic	Zc3h11a	.	nonsynonymous SNV	Zc3h11a:NM_001357228:exon12:c.G1276A:p.A426T,Zc3h11a:NM_144530:exon12:c.G1276A:p.A426T,Zc3h11a:NM_001276767:exon13:c.G1276A:p.A426T	.	het	.	1	133626965	133626965	A	T	het	40.64	14
1	134324082	134324082	C	G	exonic	Ppfia4	.	nonsynonymous SNV	Ppfia4:NM_001144855:exon10:c.G1353C:p.E451D,Ppfia4:NM_001374777:exon11:c.G1353C:p.E451D	.	het	.	1	134324082	134324082	C	G	het	106.64	11
1	134406323	134406323	G	C	exonic	Cyb5r1	.	nonsynonymous SNV	Cyb5r1:NM_028057:exon2:c.T26C:p.L9S	.	het	.	1	134406323	134406323	G	C	het	187.64	25
1	134406358	134406358	A	G	exonic	Cyb5r1	.	nonsynonymous SNV	Cyb5r1:NM_028057:exon2:c.C61G:p.L21V	.	het	.	1	134406358	134406358	A	G	het	31.64	14
1	134955733	134955733	G	T	exonic	Ppp1r12b	.	nonsynonymous SNV	Ppp1r12b:NM_001081307:exon1:c.C50A:p.A17E,Ppp1r12b:NM_001368827:exon1:c.C50A:p.A17E	.	het	.	1	134955733	134955733	G	T	het	213.64	12
1	134955745	134955745	A	C	exonic	Ppp1r12b	.	nonsynonymous SNV	Ppp1r12b:NM_001081307:exon1:c.A38G:p.E13G,Ppp1r12b:NM_001368827:exon1:c.A38G:p.E13G	.	het	.	1	134955745	134955745	A	C	het	130.64	14
1	134955751	134955751	A	T	exonic	Ppp1r12b	.	nonsynonymous SNV	Ppp1r12b:NM_001081307:exon1:c.G32A:p.R11Q,Ppp1r12b:NM_001368827:exon1:c.G32A:p.R11Q	.	het	.	1	134955751	134955751	A	T	het	130.64	14
1	134955770	134955770	A	G	exonic	Ppp1r12b	.	nonsynonymous SNV	Ppp1r12b:NM_001081307:exon1:c.G13C:p.E5Q,Ppp1r12b:NM_001368827:exon1:c.G13C:p.E5Q	.	het	.	1	134955770	134955770	A	G	het	125.64	13
1	135257112	135257112	C	T	exonic	Elf3	.	nonsynonymous SNV	Elf3:NM_001163131:exon3:c.C335A:p.S112Y,Elf3:NM_007921:exon3:c.C275A:p.S92Y	.	het	.	1	135257112	135257112	C	T	het	77.64	10
1	135309793	135309793	T	C	exonic	Timm17a	.	nonsynonymous SNV	Timm17a:NM_001360857:exon2:c.A38G:p.K13R,Timm17a:NM_011590:exon2:c.A104G:p.K35R	.	het	.	1	135309793	135309793	T	C	het	216.64	10
1	136486299	136486299	C	A	exonic	Kif14	.	nonsynonymous SNV	Kif14:NM_001287179:exon10:c.T2112A:p.N704K	.	het	.	1	136486299	136486299	C	A	het	166.64	17
1	136486300	136486300	A	G	exonic	Kif14	.	nonsynonymous SNV	Kif14:NM_001287179:exon10:c.T2113G:p.S705A	.	het	.	1	136486300	136486300	A	G	het	166.64	17
1	136519741	136519741	A	T	exonic	Kif14	.	nonsynonymous SNV	Kif14:NM_001287179:exon25:c.A4283T:p.K1428M	.	het	.	1	136519741	136519741	A	T	het	343.64	33
1	136519762	136519762	G	A	exonic	Kif14	.	nonsynonymous SNV	Kif14:NM_001287179:exon25:c.G4304A:p.S1435N	.	het	.	1	136519762	136519762	G	A	het	102.64	30
1	139431955	139431955	T	C	exonic	Zbtb41	.	nonsynonymous SNV	Zbtb41:NM_172643:exon5:c.A1422C:p.R474S	.	het	.	1	139431955	139431955	T	C	het	142.64	10
1	139431956	139431956	G	A	exonic	Zbtb41	.	nonsynonymous SNV	Zbtb41:NM_172643:exon5:c.C1423A:p.P475T	.	het	.	1	139431956	139431956	G	A	het	142.64	10
1	139431995	139431995	T	C	exonic	Zbtb41	.	nonsynonymous SNV	Zbtb41:NM_172643:exon5:c.A1462C:p.K488Q	.	het	.	1	139431995	139431995	T	C	het	265.64	14
1	139431996	139431996	G	C	exonic	Zbtb41	.	nonsynonymous SNV	Zbtb41:NM_172643:exon5:c.A1463C:p.K488T	.	het	.	1	139431996	139431996	G	C	het	265.64	14
1	139431998	139431998	G	A	exonic	Zbtb41	.	nonsynonymous SNV	Zbtb41:NM_172643:exon5:c.C1465A:p.P489T	.	het	.	1	139431998	139431998	G	A	het	265.64	14
1	139457981	139457981	G	A	exonic	Aspm	.	nonsynonymous SNV	Aspm:NM_009791:exon3:c.T1362A:p.S454R	.	het	.	1	139457981	139457981	G	A	het	31.64	17
1	139489985	139489985	T	G	exonic	Aspm	.	nonsynonymous SNV	Aspm:NM_009791:exon24:c.T8593G:p.W2865G	.	het	.	1	139489985	139489985	T	G	het	181.64	42
1	139622637	139622637	G	A	exonic	Cfhr3	.	nonsynonymous SNV	Cfhr3:NM_001374101:exon3:c.G394T:p.A132S,Cfhr3:NM_001374102:exon3:c.G394T:p.A132S	.	het	.	1	139622637	139622637	G	A	het	176.64	29
1	139622762	139622762	T	G	exonic	Cfhr3	.	nonsynonymous SNV	Cfhr3:NM_001374101:exon3:c.A269C:p.H90P,Cfhr3:NM_001374102:exon3:c.A269C:p.H90P	.	het	.	1	139622762	139622762	T	G	het	59.59	10
1	139753054	139753054	G	A	exonic	Gm4788	.	nonsynonymous SNV	Gm4788:NM_001029977:exon5:c.G725T:p.G242V,Gm4788:NM_001160303:exon5:c.G725T:p.G242V,Gm4788:NM_001160304:exon5:c.G725T:p.G242V	.	het	.	1	139753054	139753054	G	A	het	106.64	22
1	150105612	150105612	G	A	exonic	Ptgs2	.	nonsynonymous SNV	Ptgs2:NM_011198:exon10:c.T1645A:p.S549T	.	het	.	1	150105612	150105612	G	A	het	240.64	26
1	150402277	150402277	A	G	exonic	Tpr	.	nonsynonymous SNV	Tpr:NM_133780:exon5:c.A575G:p.E192G	.	het	.	1	150402277	150402277	A	G	het	46.64	12
1	150402280	150402280	A	G	exonic	Tpr	.	nonsynonymous SNV	Tpr:NM_133780:exon5:c.A578G:p.E193G	.	het	.	1	150402280	150402280	A	G	het	46.64	12
1	150403881	150403881	T	A	exonic	Tpr	.	nonsynonymous SNV	Tpr:NM_133780:exon7:c.G760A:p.E254K	.	het	.	1	150403881	150403881	T	A	het	127.64	15
1	150403884	150403884	A	C	exonic	Tpr	.	nonsynonymous SNV	Tpr:NM_133780:exon7:c.A763C:p.K255Q	.	het	.	1	150403884	150403884	A	C	het	127.64	15
1	150603830	150603830	T	G	exonic	Hmcn1	.	nonsynonymous SNV	Hmcn1:NM_001024720:exon89:c.G13882C:p.A4628P	.	het	.	1	150603830	150603830	T	G	het	34.64	31
1	150603937	150603937	A	G	exonic	Hmcn1	.	nonsynonymous SNV	Hmcn1:NM_001024720:exon89:c.G13775C:p.S4592T	.	het	.	1	150603937	150603937	A	G	het	195.64	26
1	150604111	150604111	A	G	exonic	Hmcn1	.	nonsynonymous SNV	Hmcn1:NM_001024720:exon88:c.A13735C:p.N4579H	.	het	.	1	150604111	150604111	A	G	het	49.64	26
1	150604963	150604963	C	T	exonic	Hmcn1	.	nonsynonymous SNV	Hmcn1:NM_001024720:exon87:c.G13461A:p.M4487I	.	het	.	1	150604963	150604963	C	T	het	51.64	17
1	150604977	150604977	T	C	exonic	Hmcn1	.	nonsynonymous SNV	Hmcn1:NM_001024720:exon87:c.A13447G:p.N4483D	.	het	.	1	150604977	150604977	T	C	het	82.64	15
1	150604985	150604985	G	A	exonic	Hmcn1	.	nonsynonymous SNV	Hmcn1:NM_001024720:exon87:c.C13439T:p.S4480F	.	het	.	1	150604985	150604985	G	A	het	82.64	15
1	150604991	150604991	C	T	exonic	Hmcn1	.	nonsynonymous SNV	Hmcn1:NM_001024720:exon87:c.C13433A:p.P4478H	.	het	.	1	150604991	150604991	C	T	het	82.64	15
1	150604993	150604993	A	G	exonic	Hmcn1	.	nonsynonymous SNV	Hmcn1:NM_001024720:exon87:c.A13431C:p.Q4477H	.	het	.	1	150604993	150604993	A	G	het	82.64	15
1	150664792	150664792	G	C	exonic	Hmcn1	.	nonsynonymous SNV	Hmcn1:NM_001024720:exon56:c.C8765G:p.S2922C	.	het	.	1	150664792	150664792	G	C	het	74.64	34
1	150664942	150664942	A	G	exonic	Hmcn1	.	nonsynonymous SNV	Hmcn1:NM_001024720:exon56:c.G8615C:p.G2872A	.	het	.	1	150664942	150664942	A	G	het	82.64	23
1	150671914	150671914	G	C	exonic	Hmcn1	.	nonsynonymous SNV	Hmcn1:NM_001024720:exon53:c.A8285G:p.Q2762R	.	het	.	1	150671914	150671914	G	C	het	52.64	10
1	150671917	150671917	T	C	exonic	Hmcn1	.	nonsynonymous SNV	Hmcn1:NM_001024720:exon53:c.T8282G:p.I2761R	.	het	.	1	150671917	150671917	T	C	het	52.64	10
1	150806443	150806443	T	C	exonic	Hmcn1	.	nonsynonymous SNV	Hmcn1:NM_001024720:exon9:c.C1355G:p.S452W	.	het	.	1	150806443	150806443	T	C	het	52.64	10
1	151354042	151354042	T	G	exonic	Ivns1abp	.	nonsynonymous SNV	Ivns1abp:NM_001359262:exon5:c.T354G:p.H118Q,Ivns1abp:NM_001039511:exon6:c.T480G:p.H160Q,Ivns1abp:NM_001039512:exon6:c.T480G:p.H160Q,Ivns1abp:NM_054102:exon6:c.T480G:p.H160Q	.	het	.	1	151354042	151354042	T	G	het	42.64	12
1	151354059	151354059	A	G	exonic	Ivns1abp	.	nonsynonymous SNV	Ivns1abp:NM_001359262:exon5:c.A371G:p.E124G,Ivns1abp:NM_001039511:exon6:c.A497G:p.E166G,Ivns1abp:NM_001039512:exon6:c.A497G:p.E166G,Ivns1abp:NM_054102:exon6:c.A497G:p.E166G	.	het	.	1	151354059	151354059	A	G	het	199.64	14
1	151354092	151354092	A	C	exonic	Ivns1abp	.	nonsynonymous SNV	Ivns1abp:NM_001359262:exon5:c.A404C:p.K135T,Ivns1abp:NM_001039511:exon6:c.A530C:p.K177T,Ivns1abp:NM_001039512:exon6:c.A530C:p.K177T,Ivns1abp:NM_054102:exon6:c.A530C:p.K177T	.	het	.	1	151354092	151354092	A	C	het	211.64	17
1	151354713	151354713	C	T	exonic	Ivns1abp	.	nonsynonymous SNV	Ivns1abp:NM_001359262:exon6:c.G485T:p.R162L,Ivns1abp:NM_001039511:exon7:c.G611T:p.R204L,Ivns1abp:NM_054102:exon7:c.G611T:p.R204L	.	het	.	1	151354713	151354713	C	T	het	61.64	15
1	151388672	151388672	C	T	exonic	Swt1	.	nonsynonymous SNV	Swt1:NM_025819:exon15:c.T2090A:p.V697D	.	het	.	1	151388672	151388672	C	T	het	101.64	21
1	151401096	151401096	G	A	exonic	Swt1	.	nonsynonymous SNV	Swt1:NM_025819:exon11:c.C1528T:p.L510F	.	het	.	1	151401096	151401096	G	A	het	156.64	12
1	151401125	151401125	A	G	exonic	Swt1	.	nonsynonymous SNV	Swt1:NM_025819:exon11:c.T1499C:p.L500P	.	het	.	1	151401125	151401125	A	G	het	174.64	13
1	151407623	151407623	A	T	exonic	Swt1	.	nonsynonymous SNV	Swt1:NM_025819:exon7:c.C982A:p.P328T	.	het	.	1	151407623	151407623	A	T	het	253.64	18
1	151407635	151407635	A	G	exonic	Swt1	.	nonsynonymous SNV	Swt1:NM_025819:exon7:c.A970C:p.S324R	.	het	.	1	151407635	151407635	A	G	het	32.64	13
1	152756672	152756672	T	A	exonic	Apobec4	.	nonsynonymous SNV	Apobec4:NM_001081197:exon2:c.T450A:p.S150R	.	het	.	1	152756672	152756672	T	A	het	36.64	11
1	152756689	152756689	A	G	exonic	Apobec4	.	nonsynonymous SNV	Apobec4:NM_001081197:exon2:c.T467G:p.L156R	.	het	.	1	152756689	152756689	A	G	het	130.64	14
1	152756755	152756755	G	A	exonic	Apobec4	.	nonsynonymous SNV	Apobec4:NM_001081197:exon2:c.G533A:p.S178N	.	het	.	1	152756755	152756755	G	A	het	38.64	12
1	153445915	153445915	A	G	exonic	Shcbp1l	.	nonsynonymous SNV	Shcbp1l:NM_001033162:exon7:c.A1258G:p.N420D	.	het	.	1	153445915	153445915	A	G	het	90.64	22
1	154204145	154204145	G	C	exonic	Zfp648	.	nonsynonymous SNV	Zfp648:NM_001204908:exon2:c.A49C:p.S17R	.	het	.	1	154204145	154204145	G	C	het	34.64	17
1	154425923	154425923	C	T	exonic	Cacna1e	.	nonsynonymous SNV	Cacna1e:NM_009782:exon37:c.C5062A:p.P1688T	.	het	.	1	154425923	154425923	C	T	het	67.64	20
1	155283390	155283390	A	G	exonic	Xpr1	.	nonsynonymous SNV	Xpr1:NM_011273:exon14:c.A1850C:p.N617T	.	het	.	1	155283390	155283390	A	G	het	100.64	13
1	155283400	155283400	T	G	exonic	Xpr1	.	nonsynonymous SNV	Xpr1:NM_011273:exon14:c.G1840C:p.E614Q	.	het	.	1	155283400	155283400	T	G	het	73.64	10
1	155909208	155909208	G	A	exonic	Cep350	.	nonsynonymous SNV	Cep350:NM_001039184:exon21:c.C4603T:p.R1535W	.	het	.	1	155909208	155909208	G	A	het	98.64	19
1	155909238	155909238	C	T	exonic	Cep350	.	nonsynonymous SNV	Cep350:NM_001039184:exon21:c.G4573A:p.E1525K	.	het	.	1	155909238	155909238	C	T	het	73.64	18
1	155909250	155909250	T	G	exonic	Cep350	.	nonsynonymous SNV	Cep350:NM_001039184:exon21:c.G4561C:p.D1521H	.	het	.	1	155909250	155909250	T	G	het	60.64	18
1	155909288	155909288	C	T	exonic	Cep350	.	nonsynonymous SNV	Cep350:NM_001039184:exon21:c.C4523A:p.A1508D	.	het	.	1	155909288	155909288	C	T	het	70.64	19
1	155909295	155909295	A	G	exonic	Cep350	.	nonsynonymous SNV	Cep350:NM_001039184:exon21:c.G4516C:p.E1506Q	.	het	.	1	155909295	155909295	A	G	het	79.64	15
1	155909325	155909325	G	C	exonic	Cep350	.	nonsynonymous SNV	Cep350:NM_001039184:exon21:c.A4486G:p.S1496G	.	het	.	1	155909325	155909325	G	C	het	30.64	13
1	155958598	155958598	T	G	exonic	Cep350	.	nonsynonymous SNV	Cep350:NM_001039184:exon5:c.A352C:p.N118H	.	het	.	1	155958598	155958598	T	G	het	63.64	14
1	155959722	155959722	A	G	exonic	Cep350	.	nonsynonymous SNV	Cep350:NM_001039184:exon4:c.A227C:p.K76T	.	het	.	1	155959722	155959722	A	G	het	46.64	12
1	155959740	155959740	T	A	exonic	Cep350	.	nonsynonymous SNV	Cep350:NM_001039184:exon4:c.C209T:p.T70I	.	het	.	1	155959740	155959740	T	A	het	46.64	12
1	155959752	155959752	C	T	exonic	Cep350	.	nonsynonymous SNV	Cep350:NM_001039184:exon4:c.C197A:p.S66Y	.	het	.	1	155959752	155959752	C	T	het	215.64	17
1	155959766	155959766	A	G	exonic	Cep350	.	nonsynonymous SNV	Cep350:NM_001039184:exon4:c.G183C:p.M61I	.	het	.	1	155959766	155959766	A	G	het	102.64	17
1	155959777	155959777	A	G	exonic	Cep350	.	nonsynonymous SNV	Cep350:NM_001039184:exon4:c.G172C:p.D58H	.	het	.	1	155959777	155959777	A	G	het	178.64	13
1	156063635	156063635	T	C	exonic	Tor1aip2	.	nonsynonymous SNV	Tor1aip2:NM_001358626:exon4:c.A692C:p.K231T,Tor1aip2:NM_001358627:exon5:c.A692C:p.K231T,Tor1aip2:NM_172843:exon6:c.A692C:p.K231T	.	het	.	1	156063635	156063635	T	C	het	229.64	30
1	156064986	156064986	A	G	exonic	Tor1aip2	.	nonsynonymous SNV	Tor1aip2:NM_001358626:exon5:c.A1037G:p.H346R,Tor1aip2:NM_001358627:exon6:c.A1037G:p.H346R,Tor1aip2:NM_172843:exon7:c.A1037G:p.H346R	.	het	.	1	156064986	156064986	A	G	het	52.64	10
1	156064988	156064988	T	C	exonic	Tor1aip2	.	nonsynonymous SNV	Tor1aip2:NM_001358626:exon5:c.G1039C:p.V347L,Tor1aip2:NM_001358627:exon6:c.G1039C:p.V347L,Tor1aip2:NM_172843:exon7:c.G1039C:p.V347L	.	het	.	1	156064988	156064988	T	C	het	52.64	10
1	156402888	156402888	T	A	exonic	Axdnd1	.	nonsynonymous SNV	Axdnd1:NM_001346967:exon5:c.A429T:p.K143N	.	het	.	1	156402888	156402888	T	A	het	35.64	13
1	156441266	156441266	C	T	exonic	Soat1	.	nonsynonymous SNV	Soat1:NM_009230:exon7:c.T713A:p.L238Q	.	het	.	1	156441266	156441266	C	T	het	208.64	33
1	156441270	156441270	A	C	exonic	Soat1	.	nonsynonymous SNV	Soat1:NM_009230:exon7:c.A709G:p.T237A	.	het	.	1	156441270	156441270	A	C	het	275.64	35
1	156441275	156441275	G	A	exonic	Soat1	.	nonsynonymous SNV	Soat1:NM_009230:exon7:c.C704T:p.A235V	.	het	.	1	156441275	156441275	G	A	het	275.64	35
1	156441294	156441294	T	C	exonic	Soat1	.	nonsynonymous SNV	Soat1:NM_009230:exon7:c.C685G:p.P229A	.	het	.	1	156441294	156441294	T	C	het	118.64	33
1	156705747	156705747	A	G	exonic	Fam20b	.	nonsynonymous SNV	Fam20b:NM_145413:exon2:c.G298C:p.D100H	.	het	.	1	156705747	156705747	A	G	het	46.64	15
1	156884573	156884573	T	G	exonic	Ralgps2	.	nonsynonymous SNV	Ralgps2:NM_001159968:exon6:c.T335C:p.L112S,Ralgps2:NM_001159965:exon7:c.T440C:p.L147S,Ralgps2:NM_001159966:exon7:c.T440C:p.L147S,Ralgps2:NM_001159967:exon7:c.T440C:p.L147S,Ralgps2:NM_023884:exon7:c.T440C:p.L147S,Ralgps2:NM_001357391:exon8:c.T20C:p.L7S,Ralgps2:NM_001357392:exon8:c.T20C:p.L7S	.	het	.	1	156884573	156884573	T	G	het	200.64	22
1	157230143	157230143	A	G	exonic	Rasal2	.	nonsynonymous SNV	Rasal2:NM_177644:exon4:c.G457C:p.V153L	.	het	.	1	157230143	157230143	A	G	het	172.64	11
1	160146348	160146348	G	T	exonic	Tnn	.	nonsynonymous SNV	Tnn:NM_177839:exon3:c.C448A:p.P150T	.	het	.	1	160146348	160146348	G	T	het	46.64	12
1	160203698	160203698	A	G	exonic	Cacybp	.	nonsynonymous SNV	Cacybp:NM_009786:exon6:c.G559C:p.D187H	.	het	.	1	160203698	160203698	A	G	het	109.64	10
1	160577167	160577167	G	A	exonic	Gpr52	.	nonsynonymous SNV	Gpr52:NM_001146330:exon2:c.C587T:p.S196F,Gpr52:NM_001368668:exon2:c.C587T:p.S196F	.	het	.	1	160577167	160577167	G	A	het	33.64	11
1	161041832	161041832	C	T	exonic	Dars2	.	nonsynonymous SNV	Dars2:NM_172644:exon17:c.G1846A:p.A616T	.	het	.	1	161041832	161041832	C	T	het	87.64	12
1	162720511	162720511	A	G	exonic	Prrc2c	.	nonsynonymous SNV	Prrc2c:NM_001081290:exon5:c.T496C:p.Y166H	.	het	.	1	162720511	162720511	A	G	het	80.64	10
1	162859461	162859461	G	A	exonic	Fmo1	.	nonsynonymous SNV	Fmo1:NM_001330291:exon2:c.G96T:p.E32D,Fmo1:NM_001330318:exon2:c.G96T:p.E32D,Fmo1:NM_010231:exon2:c.G96T:p.E32D	.	het	.	1	162859461	162859461	G	A	het	116.64	12
1	162859481	162859481	T	C	exonic	Fmo1	.	nonsynonymous SNV	Fmo1:NM_001330291:exon2:c.C76G:p.L26V,Fmo1:NM_001330318:exon2:c.C76G:p.L26V,Fmo1:NM_010231:exon2:c.C76G:p.L26V	.	het	.	1	162859481	162859481	T	C	het	167.64	18
1	162859501	162859501	T	C	exonic	Fmo1	.	nonsynonymous SNV	Fmo1:NM_001330291:exon2:c.A56G:p.K19R,Fmo1:NM_001330318:exon2:c.A56G:p.K19R,Fmo1:NM_010231:exon2:c.A56G:p.K19R	.	het	.	1	162859501	162859501	T	C	het	41.64	23
1	162877003	162877003	C	A	exonic	Fmo2	.	nonsynonymous SNV	Fmo2:NM_001360913:exon8:c.G1333T:p.A445S,Fmo2:NM_001360914:exon9:c.G1333T:p.A445S,Fmo2:NM_018881:exon9:c.G1333T:p.A445S	.	het	.	1	162877003	162877003	C	A	het	35.64	10
1	163045664	163045664	C	A	exonic	Mroh9	.	nonsynonymous SNV	Mroh9:NM_030071:exon16:c.C1738T:p.P580S	.	het	.	1	163045664	163045664	C	A	het	21.64	16
1	163046065	163046065	C	G	exonic	Mroh9	.	nonsynonymous SNV	Mroh9:NM_030071:exon15:c.A1520C:p.Q507P	.	het	.	1	163046065	163046065	C	G	het	56.64	17
1	163703286	163703286	T	C	exonic	Mettl11b	.	nonsynonymous SNV	Mettl11b:NM_001143956:exon4:c.T583G:p.Y195D	.	het	.	1	163703286	163703286	T	C	het	63.64	11
1	163941112	163941112	G	C	exonic	Scyl3	.	nonsynonymous SNV	Scyl3:NM_001286002:exon7:c.G631C:p.A211P,Scyl3:NM_028776:exon7:c.G631C:p.A211P	.	het	.	1	163941112	163941112	G	C	het	193.64	23
1	163941117	163941117	T	A	exonic	Scyl3	.	nonsynonymous SNV	Scyl3:NM_001286002:exon7:c.C636A:p.D212E,Scyl3:NM_028776:exon7:c.C636A:p.D212E	.	het	.	1	163941117	163941117	T	A	het	193.64	23
1	164049468	164049468	T	C	exonic	Sele	.	nonsynonymous SNV	Sele:NM_011345:exon3:c.G312C:p.W104C	.	het	.	1	164049468	164049468	T	C	het	30.64	12
1	164345231	164345231	G	T	exonic	Nme7	.	nonsynonymous SNV	Nme7:NM_001293313:exon8:c.G510T:p.Q170H,Nme7:NM_138314:exon8:c.G510T:p.Q170H,Nme7:NM_178071:exon8:c.G510T:p.Q170H	.	het	.	1	164345231	164345231	G	T	het	94.64	11
1	164345232	164345232	C	A	exonic	Nme7	.	nonsynonymous SNV	Nme7:NM_001293313:exon8:c.T511A:p.F171I,Nme7:NM_138314:exon8:c.T511A:p.F171I,Nme7:NM_178071:exon8:c.T511A:p.F171I	.	het	.	1	164345232	164345232	C	A	het	94.64	11
1	166388676	166388676	A	C	exonic	Tada1	.	nonsynonymous SNV	Tada1:NM_030245:exon5:c.G445C:p.G149R	.	het	.	1	166388676	166388676	A	C	het	174.64	25
1	166388694	166388694	T	G	exonic	Tada1	.	nonsynonymous SNV	Tada1:NM_030245:exon5:c.A463G:p.M155V	.	het	.	1	166388694	166388694	T	G	het	177.64	73
1	166388696	166388696	G	A	exonic	Tada1	.	nonsynonymous SNV	Tada1:NM_030245:exon5:c.G465A:p.M155I	.	het	.	1	166388696	166388696	G	A	het	174.64	74
1	166388699	166388699	T	G	exonic	Tada1	.	nonsynonymous SNV	Tada1:NM_030245:exon5:c.C468G:p.I156M	.	het	.	1	166388699	166388699	T	G	het	174.64	74
1	166388726	166388726	G	A	exonic	Tada1	.	nonsynonymous SNV	Tada1:NM_030245:exon5:c.C495A:p.D165E	.	het	.	1	166388726	166388726	G	A	het	509.64	72
1	166389935	166389935	A	G	exonic	Tada1	.	nonsynonymous SNV	Tada1:NM_030245:exon6:c.C640G:p.P214A	.	het	.	1	166389935	166389935	A	G	het	348.64	84
1	166389973	166389973	T	A	exonic	Tada1	.	nonsynonymous SNV	Tada1:NM_030245:exon6:c.C678A:p.N226K	.	het	.	1	166389973	166389973	T	A	het	116.64	64
1	166391833	166391833	A	G	exonic	Tada1	.	nonsynonymous SNV	Tada1:NM_030245:exon7:c.T703G:p.F235V	.	het	.	1	166391833	166391833	A	G	het	52.64	25
1	166391854	166391854	T	A	exonic	Tada1	.	nonsynonymous SNV	Tada1:NM_030245:exon7:c.C724A:p.Q242K	.	het	.	1	166391854	166391854	T	A	het	38.64	23
1	166391942	166391942	T	A	exonic	Tada1	.	nonsynonymous SNV	Tada1:NM_030245:exon7:c.C812A:p.S271Y	.	het	.	1	166391942	166391942	T	A	het	34.64	13
1	169981988	169981988	C	T	exonic	Ddr2	.	nonsynonymous SNV	Ddr2:NM_022563:exon16:c.C2419A:p.Q807K	.	het	.	1	169981988	169981988	C	T	het	88.64	13
1	169981997	169981997	A	T	exonic	Ddr2	.	nonsynonymous SNV	Ddr2:NM_022563:exon16:c.T2410A:p.F804I	.	het	.	1	169981997	169981997	A	T	het	88.64	13
1	169982062	169982062	G	T	exonic	Ddr2	.	nonsynonymous SNV	Ddr2:NM_022563:exon16:c.T2345A:p.F782Y	.	het	.	1	169982062	169982062	G	T	het	84.64	10
1	170390772	170390772	T	C	exonic	Nos1ap	.	nonsynonymous SNV	Nos1ap:NM_001109985:exon3:c.T229G:p.S77A	.	het	.	1	170390772	170390772	T	C	het	43.64	13
1	170681201	170681201	T	C	exonic	Olfml2b	.	nonsynonymous SNV	Olfml2b:NM_177068:exon7:c.A1627C:p.N543H	.	het	.	1	170681201	170681201	T	C	het	183.64	13
1	170920920	170920920	G	C	exonic	Fcrla	.	nonsynonymous SNV	Fcrla:NM_001160215:exon4:c.A731G:p.E244G,Fcrla:NM_145141:exon4:c.A728G:p.E243G	.	het	.	1	170920920	170920920	G	C	het	98.64	19
1	170920983	170920983	T	C	exonic	Fcrla	.	nonsynonymous SNV	Fcrla:NM_001160215:exon4:c.A668G:p.D223G,Fcrla:NM_145141:exon4:c.A665G:p.D222G	.	het	.	1	170920983	170920983	T	C	het	626.64	26
1	170921028	170921028	A	C	exonic	Fcrla	.	nonsynonymous SNV	Fcrla:NM_001160215:exon4:c.C623G:p.A208G,Fcrla:NM_145141:exon4:c.C620G:p.A207G	.	het	.	1	170921028	170921028	A	C	het	303.64	13
1	171125042	171125042	T	C	exonic	Cfap126	.	nonsynonymous SNV	Cfap126:NM_001379426:exon2:c.A36C:p.K12N,Cfap126:NM_001081275:exon3:c.A36C:p.K12N,Cfap126:NM_001379427:exon3:c.A36C:p.K12N	.	het	.	1	171125042	171125042	T	C	het	124.64	20
1	171257888	171257888	A	T	exonic	Adamts4	.	nonsynonymous SNV	Adamts4:NM_172845:exon8:c.A2069T:p.K690I	.	het	.	1	171257888	171257888	A	T	het	166.64	21
1	171272660	171272660	T	A	exonic	B4galt3	.	nonsynonymous SNV	B4galt3:NM_020579:exon4:c.T399A:p.H133Q	.	het	.	1	171272660	171272660	T	A	het	301.64	17
1	171272678	171272678	G	A	exonic	B4galt3	.	nonsynonymous SNV	B4galt3:NM_020579:exon4:c.C417A:p.H139Q	.	het	.	1	171272678	171272678	G	A	het	220.64	14
1	171272694	171272694	C	A	exonic	B4galt3	.	nonsynonymous SNV	B4galt3:NM_020579:exon4:c.T433A:p.Y145N	.	het	.	1	171272694	171272694	C	A	het	181.64	12
1	171272725	171272725	T	C	exonic	B4galt3	.	nonsynonymous SNV	B4galt3:NM_020579:exon4:c.A464C:p.Q155P	.	het	.	1	171272725	171272725	T	C	het	224.64	11
1	171276168	171276168	C	T	exonic	B4galt3	.	nonsynonymous SNV	B4galt3:NM_020579:exon8:c.A977T:p.Y326F	.	het	.	1	171276168	171276168	C	T	het	142.64	18
1	171342665	171342665	G	T	exonic	Nit1	.	nonsynonymous SNV	Nit1:NM_001242580:exon7:c.C739A:p.R247S,Nit1:NM_012049:exon7:c.C838A:p.R280S	.	het	.	1	171342665	171342665	G	T	het	264.64	10
1	171342680	171342680	G	A	exonic	Nit1	.	nonsynonymous SNV	Nit1:NM_001242580:exon7:c.G724T:p.G242C,Nit1:NM_012049:exon7:c.G823T:p.G275C	.	het	.	1	171342680	171342680	G	A	het	52.64	10
1	171342709	171342709	T	C	exonic	Nit1	.	nonsynonymous SNV	Nit1:NM_001242580:exon7:c.A695G:p.Y232C,Nit1:NM_012049:exon7:c.A794G:p.Y265C	.	het	.	1	171342709	171342709	T	C	het	36.64	11
1	171344147	171344147	G	T	exonic	Nit1	.	nonsynonymous SNV	Nit1:NM_001242580:exon4:c.C263A:p.S88Y,Nit1:NM_012049:exon4:c.C362A:p.S121Y	.	het	.	1	171344147	171344147	G	T	het	52.64	10
1	171344148	171344148	T	G	exonic	Nit1	.	nonsynonymous SNV	Nit1:NM_001242580:exon4:c.T262C:p.S88P,Nit1:NM_012049:exon4:c.T361C:p.S121P	.	het	.	1	171344148	171344148	T	G	het	52.64	10
1	171344155	171344155	G	C	exonic	Nit1	.	nonsynonymous SNV	Nit1:NM_001242580:exon4:c.C255G:p.I85M,Nit1:NM_012049:exon4:c.C354G:p.I118M	.	het	.	1	171344155	171344155	G	C	het	52.64	10
1	171344477	171344477	A	C	exonic	Nit1	.	nonsynonymous SNV	Nit1:NM_001242580:exon3:c.C53G:p.T18R,Nit1:NM_012049:exon3:c.C152G:p.T51R	.	het	.	1	171344477	171344477	A	C	het	289.64	11
1	171344490	171344490	G	A	exonic	Nit1	.	nonsynonymous SNV	Nit1:NM_001242580:exon3:c.G40T:p.V14L,Nit1:NM_012049:exon3:c.G139T:p.V47L	.	het	.	1	171344490	171344490	G	A	het	162.64	10
1	171356581	171356581	G	C	exonic	Pfdn2	.	nonsynonymous SNV	Pfdn2:NM_001360824:exon2:c.A127C:p.K43Q,Pfdn2:NM_011070:exon2:c.A127C:p.K43Q	.	hom	.	1	171356581	171356581	G	C	hom	481.06	11
1	171356582	171356582	G	T	exonic	Pfdn2	.	nonsynonymous SNV	Pfdn2:NM_001360824:exon2:c.A128T:p.K43I,Pfdn2:NM_011070:exon2:c.A128T:p.K43I	.	hom	.	1	171356582	171356582	G	T	hom	481.06	11
1	171356583	171356583	G	T	exonic	Pfdn2	.	nonsynonymous SNV	Pfdn2:NM_001360824:exon2:c.A129T:p.K43N,Pfdn2:NM_011070:exon2:c.A129T:p.K43N	.	het	.	1	171356583	171356583	G	T	het	318.64	11
1	171356617	171356617	C	T	exonic	Pfdn2	.	nonsynonymous SNV	Pfdn2:NM_001360824:exon2:c.A163T:p.S55C,Pfdn2:NM_001360825:exon2:c.A19T:p.S7C,Pfdn2:NM_011070:exon2:c.A163T:p.S55C	.	het	.	1	171356617	171356617	C	T	het	79.64	16
1	171356718	171356718	C	T	exonic	Pfdn2	.	nonsynonymous SNV	Pfdn2:NM_001360824:exon3:c.A178T:p.T60S,Pfdn2:NM_001360825:exon3:c.A34T:p.T12S,Pfdn2:NM_011070:exon3:c.A178T:p.T60S	.	het	.	1	171356718	171356718	C	T	het	271.64	12
1	171357828	171357828	C	A	exonic	Pfdn2	.	nonsynonymous SNV	Pfdn2:NM_001360824:exon4:c.C329A:p.P110Q	.	het	.	1	171357828	171357828	C	A	het	25.64	34
1	171357869	171357869	A	T	exonic	Pfdn2	.	nonsynonymous SNV	Pfdn2:NM_001360824:exon4:c.C370T:p.H124Y,Pfdn2:NM_001360825:exon4:c.C164T:p.T55I,Pfdn2:NM_011070:exon4:c.C308T:p.T103I	.	het	.	1	171357869	171357869	A	T	het	633.64	56
1	171357870	171357870	A	T	exonic	Pfdn2	.	nonsynonymous SNV	Pfdn2:NM_001360824:exon4:c.A371T:p.H124L	.	het	.	1	171357870	171357870	A	T	het	750.64	56
1	171357902	171357902	T	G	exonic	Pfdn2	.	nonsynonymous SNV	Pfdn2:NM_001360824:exon4:c.A403G:p.N135D,Pfdn2:NM_001360825:exon4:c.A197G:p.E66G,Pfdn2:NM_011070:exon4:c.A341G:p.E114G	.	het	.	1	171357902	171357902	T	G	het	35.64	62
1	171357929	171357929	T	C	exonic	Pfdn2	.	nonsynonymous SNV	Pfdn2:NM_001360825:exon4:c.A224C:p.N75T,Pfdn2:NM_011070:exon4:c.A368C:p.N123T	.	het	.	1	171357929	171357929	T	C	het	1546.64	71
1	171357930	171357930	A	G	exonic	Pfdn2	.	nonsynonymous SNV	Pfdn2:NM_001360825:exon4:c.C225G:p.N75K,Pfdn2:NM_011070:exon4:c.C369G:p.N123K	.	het	.	1	171357930	171357930	A	G	het	544.64	71
1	171357956	171357956	C	T	exonic	Pfdn2	.	nonsynonymous SNV	Pfdn2:NM_001360825:exon4:c.A251T:p.K84M,Pfdn2:NM_011070:exon4:c.A395T:p.K132M	.	het	.	1	171357956	171357956	C	T	het	280.64	62
1	171357991	171357991	C	T	exonic	Pfdn2	.	nonsynonymous SNV	Pfdn2:NM_001360825:exon4:c.G286T:p.A96S,Pfdn2:NM_011070:exon4:c.G430T:p.A144S	.	het	.	1	171357991	171357991	C	T	het	565.64	74
1	171358828	171358828	C	T	exonic	Klhdc9	.	nonsynonymous SNV	Klhdc9:NM_001033039:exon4:c.G1039A:p.E347K	.	het	.	1	171358828	171358828	C	T	het	388.64	18
1	171358834	171358834	T	C	exonic	Klhdc9	.	nonsynonymous SNV	Klhdc9:NM_001033039:exon4:c.A1033G:p.I345V	.	het	.	1	171358834	171358834	T	C	het	388.64	18
1	171358840	171358840	G	T	exonic	Klhdc9	.	nonsynonymous SNV	Klhdc9:NM_001033039:exon4:c.G1027A:p.V343I	.	het	.	1	171358840	171358840	G	T	het	388.64	18
1	171358842	171358842	G	A	exonic	Klhdc9	.	nonsynonymous SNV	Klhdc9:NM_001033039:exon4:c.A1025T:p.Q342L	.	het	.	1	171358842	171358842	G	A	het	391.64	17
1	171358849	171358849	T	G	exonic	Klhdc9	.	nonsynonymous SNV	Klhdc9:NM_001033039:exon4:c.A1018C:p.S340R	.	het	.	1	171358849	171358849	T	G	het	124.64	16
1	171358855	171358855	G	A	exonic	Klhdc9	.	nonsynonymous SNV	Klhdc9:NM_001033039:exon4:c.A1012T:p.T338S	.	het	.	1	171358855	171358855	G	A	het	205.64	19
1	171358857	171358857	C	T	exonic	Klhdc9	.	nonsynonymous SNV	Klhdc9:NM_001033039:exon4:c.G1010A:p.R337K	.	het	.	1	171358857	171358857	C	T	het	205.64	19
1	171358861	171358861	A	G	exonic	Klhdc9	.	nonsynonymous SNV	Klhdc9:NM_001033039:exon4:c.G1006C:p.G336R	.	het	.	1	171358861	171358861	A	G	het	202.64	20
1	171358864	171358864	C	A	exonic	Klhdc9	.	nonsynonymous SNV	Klhdc9:NM_001033039:exon4:c.G1003T:p.D335Y	.	het	.	1	171358864	171358864	C	A	het	472.64	20
1	171358872	171358872	G	C	exonic	Klhdc9	.	nonsynonymous SNV	Klhdc9:NM_001033039:exon4:c.T995G:p.F332C	.	het	.	1	171358872	171358872	G	C	het	472.64	20
1	171358878	171358878	C	T	exonic	Klhdc9	.	nonsynonymous SNV	Klhdc9:NM_001033039:exon4:c.G989A:p.G330E	.	het	.	1	171358878	171358878	C	T	het	472.64	20
1	171358879	171358879	C	A	exonic	Klhdc9	.	nonsynonymous SNV	Klhdc9:NM_001033039:exon4:c.G988T:p.G330W	.	het	.	1	171358879	171358879	C	A	het	205.64	19
1	171358884	171358884	T	C	exonic	Klhdc9	.	nonsynonymous SNV	Klhdc9:NM_001033039:exon4:c.T983G:p.L328W	.	het	.	1	171358884	171358884	T	C	het	700.64	19
1	171358890	171358890	G	T	exonic	Klhdc9	.	nonsynonymous SNV	Klhdc9:NM_001033039:exon4:c.T977A:p.L326H	.	het	.	1	171358890	171358890	G	T	het	700.64	19
1	171358897	171358897	G	T	exonic	Klhdc9	.	nonsynonymous SNV	Klhdc9:NM_001033039:exon4:c.G970A:p.D324N	.	het	.	1	171358897	171358897	G	T	het	509.64	20
1	171358936	171358936	G	T	exonic	Klhdc9	.	nonsynonymous SNV	Klhdc9:NM_001033039:exon4:c.G931A:p.G311R	.	het	.	1	171358936	171358936	G	T	het	562.10	16
1	171358959	171358959	C	T	exonic	Klhdc9	.	nonsynonymous SNV	Klhdc9:NM_001033039:exon4:c.T908A:p.F303Y	.	het	.	1	171358959	171358959	C	T	het	391.64	17
1	171358965	171358965	A	G	exonic	Klhdc9	.	nonsynonymous SNV	Klhdc9:NM_001033039:exon4:c.T902C:p.L301P	.	het	.	1	171358965	171358965	A	G	het	394.64	16
1	171637334	171637334	G	A	exonic	Slamf7	.	nonsynonymous SNV	Slamf7:NM_144539:exon6:c.A830T:p.E277V	.	het	.	1	171637334	171637334	G	A	het	37.64	12
1	171641040	171641040	G	A	exonic	Slamf7	.	nonsynonymous SNV	Slamf7:NM_001347184:exon2:c.A283T:p.N95Y,Slamf7:NM_144539:exon3:c.A283T:p.N95Y	.	het	.	1	171641040	171641040	G	A	het	34.64	16
1	171641126	171641126	A	G	exonic	Slamf7	.	nonsynonymous SNV	Slamf7:NM_001347184:exon2:c.A197C:p.D66A,Slamf7:NM_144539:exon3:c.A197C:p.D66A	.	het	.	1	171641126	171641126	A	G	het	49.64	17
1	171641205	171641205	A	G	exonic	Slamf7	.	nonsynonymous SNV	Slamf7:NM_001347184:exon2:c.A118C:p.T40P,Slamf7:NM_144539:exon3:c.A118C:p.T40P	.	het	.	1	171641205	171641205	A	G	het	79.64	18
1	171641231	171641231	A	G	exonic	Slamf7	.	nonsynonymous SNV	Slamf7:NM_001347184:exon2:c.G92C:p.G31A,Slamf7:NM_144539:exon3:c.G92C:p.G31A	.	het	.	1	171641231	171641231	A	G	het	143.64	22
1	171641244	171641244	T	C	exonic	Slamf7	.	nonsynonymous SNV	Slamf7:NM_001347184:exon2:c.A79G:p.K27E,Slamf7:NM_144539:exon3:c.A79G:p.K27E	.	het	.	1	171641244	171641244	T	C	het	233.64	22
1	171917756	171917756	G	A	exonic	Slamf6	.	nonsynonymous SNV	Slamf6:NM_001347186:exon1:c.G49A:p.V17I,Slamf6:NM_001347187:exon1:c.G49A:p.V17I,Slamf6:NM_030710:exon1:c.G49A:p.V17I	.	het	.	1	171917756	171917756	G	A	het	122.64	11
1	171917783	171917783	C	T	exonic	Slamf6	.	nonsynonymous SNV	Slamf6:NM_001347186:exon1:c.C76T:p.L26F,Slamf6:NM_001347187:exon1:c.C76T:p.L26F,Slamf6:NM_030710:exon1:c.C76T:p.L26F	.	het	.	1	171917783	171917783	C	T	het	244.64	11
1	172284571	172284571	T	A	exonic	Atp1a2	.	nonsynonymous SNV	Atp1a2:NM_178405:exon13:c.A1756T:p.M586L	.	het	.	1	172284571	172284571	T	A	het	46.64	12
1	172284620	172284620	T	C	exonic	Atp1a2	.	nonsynonymous SNV	Atp1a2:NM_178405:exon13:c.T1707G:p.D569E	.	het	.	1	172284620	172284620	T	C	het	232.64	10
1	172284622	172284622	C	A	exonic	Atp1a2	.	nonsynonymous SNV	Atp1a2:NM_178405:exon13:c.G1705T:p.D569Y	.	het	.	1	172284622	172284622	C	A	het	232.64	10
1	173270229	173270229	A	G	exonic	Olfr418	.	nonsynonymous SNV	Olfr418:NM_146651:exon1:c.C53G:p.S18C	.	het	.	1	173270229	173270229	A	G	het	352.64	15
1	173270233	173270233	A	G	exonic	Olfr418	.	nonsynonymous SNV	Olfr418:NM_146651:exon1:c.C57G:p.S19R	.	het	.	1	173270233	173270233	A	G	het	352.64	15
1	173641139	173641139	A	C	exonic	Ifi209	.	nonsynonymous SNV	Ifi209:NM_175026:exon4:c.A534C:p.K178N	.	het	.	1	173641139	173641139	A	C	het	388.64	33
1	173641140	173641140	A	T	exonic	Ifi209	.	nonsynonymous SNV	Ifi209:NM_175026:exon4:c.A535T:p.T179S	.	het	.	1	173641140	173641140	A	T	het	388.64	33
1	173641209	173641209	C	A	exonic	Ifi209	.	nonsynonymous SNV	Ifi209:NM_175026:exon4:c.C604A:p.Q202K	.	het	.	1	173641209	173641209	C	A	het	92.64	21
1	173641243	173641243	T	G	exonic	Ifi209	.	nonsynonymous SNV	Ifi209:NM_175026:exon4:c.A638G:p.K213R	.	het	.	1	173641243	173641243	T	G	het	71.64	22
1	173642506	173642506	C	A	exonic	Ifi209	.	nonsynonymous SNV	Ifi209:NM_175026:exon5:c.T659A:p.V220E	.	het	.	1	173642506	173642506	C	A	het	31.64	14
1	173642553	173642553	T	G	exonic	Ifi209	.	nonsynonymous SNV	Ifi209:NM_175026:exon5:c.A706G:p.K236E	.	het	.	1	173642553	173642553	T	G	het	79.64	16
1	173642567	173642567	A	T	exonic	Ifi209	.	nonsynonymous SNV	Ifi209:NM_175026:exon5:c.A720T:p.L240F	.	het	.	1	173642567	173642567	A	T	het	111.64	16
1	173642612	173642612	G	A	exonic	Ifi209	.	nonsynonymous SNV	Ifi209:NM_175026:exon5:c.G765A:p.M255I	.	het	.	1	173642612	173642612	G	A	het	121.64	17
1	173642677	173642677	A	C	exonic	Ifi209	.	nonsynonymous SNV	Ifi209:NM_175026:exon5:c.A830C:p.K277T	.	het	.	1	173642677	173642677	A	C	het	64.64	14
1	173642709	173642709	T	C	exonic	Ifi209	.	nonsynonymous SNV	Ifi209:NM_175026:exon5:c.A862C:p.I288L	.	het	.	1	173642709	173642709	T	C	het	88.64	13
1	173642725	173642725	C	A	exonic	Ifi209	.	nonsynonymous SNV	Ifi209:NM_175026:exon5:c.G878A:p.G293D	.	het	.	1	173642725	173642725	C	A	het	52.64	10
1	173642791	173642791	A	C	exonic	Ifi209	.	nonsynonymous SNV	Ifi209:NM_175026:exon5:c.T944C:p.M315T	.	het	.	1	173642791	173642791	A	C	het	75.64	12
1	174229270	174229270	T	C	exonic	Spta1	.	nonsynonymous SNV	Spta1:NM_011465:exon40:c.A5588C:p.E1863A	.	het	.	1	174229270	174229270	T	C	het	69.64	11
1	176074486	176074486	T	C	exonic	Pld5	.	nonsynonymous SNV	Pld5:NM_001195816:exon4:c.C349G:p.Q117E,Pld5:NM_001357844:exon4:c.C259G:p.Q87E,Pld5:NM_001357845:exon4:c.C259G:p.Q87E,Pld5:NM_176916:exon4:c.C535G:p.Q179E	.	het	.	1	176074486	176074486	T	C	het	73.64	18
1	176074489	176074489	T	C	exonic	Pld5	.	nonsynonymous SNV	Pld5:NM_001195816:exon4:c.T346G:p.S116A,Pld5:NM_001357844:exon4:c.T256G:p.S86A,Pld5:NM_001357845:exon4:c.T256G:p.S86A,Pld5:NM_176916:exon4:c.T532G:p.S178A	.	het	.	1	176074489	176074489	T	C	het	73.64	18
1	176769502	176769502	A	G	exonic	Cep170	.	nonsynonymous SNV	Cep170:NM_001099637:exon10:c.G1288C:p.G430R	.	het	.	1	176769502	176769502	A	G	het	21.64	12
1	176919602	176919602	A	G	exonic	Sdccag8	.	nonsynonymous SNV	Sdccag8:NM_029756:exon13:c.A1544G:p.Q515R,Sdccag8:NM_001357390:exon14:c.A1571G:p.Q524R	.	het	.	1	176919602	176919602	A	G	het	40.64	10
1	177959823	177959823	G	A	exonic	Catspere1	.	nonsynonymous SNV	Catspere1:NM_001368823:exon21:c.T2666A:p.F889Y	.	het	.	1	177959823	177959823	G	A	het	64.64	21
1	177959834	177959834	T	G	exonic	Catspere1	.	nonsynonymous SNV	Catspere1:NM_001368823:exon21:c.A2677G:p.T893A	.	het	.	1	177959834	177959834	T	G	het	65.64	18
1	180579169	180579169	0	C	exonic	Parp1	.	nonsynonymous SNV	Parp1:NM_007415:exon4:c.T418C:p.S140P	.	het	.	1	180579169	180579169	-	C	het	55.60	20
1	180579258	180579258	T	C	exonic	Parp1	.	nonsynonymous SNV	Parp1:NM_007415:exon4:c.G507C:p.E169D	.	het	.	1	180579258	180579258	T	C	het	52.64	10
1	181051328	181051328	C	T	exonic	9130409I23Rik	.	nonsynonymous SNV	9130409I23Rik:NM_001033819:exon1:c.C10T:p.L4F	.	het	.	1	181051328	181051328	C	T	het	65.64	26
1	181510978	181510978	A	G	exonic	Ccdc121	.	nonsynonymous SNV	Ccdc121:NM_207280:exon1:c.A408C:p.R136S	.	het	.	1	181510978	181510978	A	G	het	65.64	21
1	181930702	181930702	T	A	exonic	Enah	.	nonsynonymous SNV	Enah:NM_001083120:exon4:c.A410T:p.Q137L,Enah:NM_001083121:exon4:c.A410T:p.Q137L,Enah:NM_008680:exon5:c.A422T:p.Q141L,Enah:NM_010135:exon5:c.A467T:p.Q156L	.	het	.	1	181930702	181930702	T	A	het	66.64	15
1	182158077	182158077	C	T	exonic	Vmn1r1	.	nonsynonymous SNV	Vmn1r1:NM_001166728:exon1:c.T22A:p.Y8N	.	het	.	1	182158077	182158077	C	T	het	278.64	43
1	182158088	182158088	C	A	exonic	Vmn1r1	.	nonsynonymous SNV	Vmn1r1:NM_001166728:exon1:c.A11T:p.N4I	.	het	.	1	182158088	182158088	C	A	het	64.64	43
1	183423632	183423632	G	A	exonic	Hhipl2	.	nonsynonymous SNV	Hhipl2:NM_030175:exon2:c.T512A:p.L171H	.	het	.	1	183423632	183423632	G	A	het	112.64	15
1	183423986	183423986	C	T	exonic	Hhipl2	.	nonsynonymous SNV	Hhipl2:NM_001308052:exon2:c.A206T:p.Y69F,Hhipl2:NM_030175:exon2:c.A866T:p.Y289F	.	het	.	1	183423986	183423986	C	T	het	32.64	17
1	184801941	184801941	G	A	exonic	Mtarc1	.	nonsynonymous SNV	Mtarc1:NM_001290273:exon4:c.G723T:p.R241S	.	het	.	1	184801941	184801941	G	A	het	308.64	22
1	190799597	190799597	T	G	exonic	Rps6kc1	.	nonsynonymous SNV	Rps6kc1:NM_178775:exon11:c.G2207C:p.G736A	.	het	.	1	190799597	190799597	T	G	het	187.64	17
1	190799673	190799673	C	G	exonic	Rps6kc1	.	nonsynonymous SNV	Rps6kc1:NM_178775:exon11:c.G2131C:p.A711P	.	het	.	1	190799673	190799673	C	G	het	71.64	13
1	190799697	190799697	A	G	exonic	Rps6kc1	.	nonsynonymous SNV	Rps6kc1:NM_178775:exon11:c.G2107C:p.D703H	.	het	.	1	190799697	190799697	A	G	het	181.64	12
1	190799703	190799703	C	T	exonic	Rps6kc1	.	nonsynonymous SNV	Rps6kc1:NM_178775:exon11:c.G2101A:p.A701T	.	het	.	1	190799703	190799703	C	T	het	85.64	14
1	190799717	190799717	C	A	exonic	Rps6kc1	.	nonsynonymous SNV	Rps6kc1:NM_178775:exon11:c.C2087T:p.T696I	.	het	.	1	190799717	190799717	C	A	het	40.64	15
1	190799721	190799721	A	T	exonic	Rps6kc1	.	nonsynonymous SNV	Rps6kc1:NM_178775:exon11:c.C2083A:p.P695T	.	het	.	1	190799721	190799721	A	T	het	37.64	15
1	190799723	190799723	A	G	exonic	Rps6kc1	.	nonsynonymous SNV	Rps6kc1:NM_178775:exon11:c.A2081C:p.Q694P	.	het	.	1	190799723	190799723	A	G	het	40.64	14
1	190799827	190799827	C	T	exonic	Rps6kc1	.	nonsynonymous SNV	Rps6kc1:NM_178775:exon11:c.T1977A:p.D659E	.	het	.	1	190799827	190799827	C	T	het	85.64	14
1	191163929	191163929	C	T	exonic	Fam71a	.	nonsynonymous SNV	Fam71a:NM_001109759:exon1:c.T516A:p.F172L	.	het	.	1	191163929	191163929	C	T	het	286.64	22
1	191163935	191163935	G	C	exonic	Fam71a	.	nonsynonymous SNV	Fam71a:NM_001109759:exon1:c.T510G:p.D170E	.	het	.	1	191163935	191163935	G	C	het	286.64	22
1	191570606	191570606	C	T	exonic	Dtl	.	nonsynonymous SNV	Dtl:NM_029766:exon2:c.C151A:p.P51T	.	het	.	1	191570606	191570606	C	T	het	71.64	16
1	191570623	191570623	T	C	exonic	Dtl	.	nonsynonymous SNV	Dtl:NM_029766:exon2:c.A134G:p.E45G	.	het	.	1	191570623	191570623	T	C	het	79.64	16
1	191570624	191570624	T	G	exonic	Dtl	.	nonsynonymous SNV	Dtl:NM_029766:exon2:c.G133C:p.E45Q	.	het	.	1	191570624	191570624	T	G	het	82.64	15
1	191570641	191570641	C	G	exonic	Dtl	.	nonsynonymous SNV	Dtl:NM_029766:exon2:c.A116C:p.E39A	.	het	.	1	191570641	191570641	C	G	het	118.64	18
1	191827178	191827178	A	G	exonic	Nek2	.	nonsynonymous SNV	Nek2:NM_010892:exon6:c.T794G:p.I265S	.	het	.	1	191827178	191827178	A	G	het	196.64	37
1	191827180	191827180	A	G	exonic	Nek2	.	nonsynonymous SNV	Nek2:NM_010892:exon6:c.C796G:p.L266V	.	het	.	1	191827180	191827180	A	G	het	199.64	36
1	191827183	191827183	T	C	exonic	Nek2	.	nonsynonymous SNV	Nek2:NM_010892:exon6:c.G799C:p.E267Q	.	het	.	1	191827183	191827183	T	C	het	199.64	36
1	191831284	191831284	A	G	exonic	Nek2	.	nonsynonymous SNV	Nek2:NM_010892:exon8:c.T1259G:p.L420R	.	het	.	1	191831284	191831284	A	G	het	184.64	15
1	191831314	191831314	A	C	exonic	Nek2	.	nonsynonymous SNV	Nek2:NM_010892:exon8:c.A1289C:p.K430T	.	het	.	1	191831314	191831314	A	C	het	208.64	13
2	3502539	3502539	G	A	exonic	Hspa14	.	nonsynonymous SNV	Hspa14:NM_001355397:exon4:c.G190T:p.V64F,Hspa14:NM_015765:exon5:c.G331T:p.V111F	.	het	.	2	3502539	3502539	G	A	het	343.64	18
2	3502577	3502577	C	G	exonic	Hspa14	.	nonsynonymous SNV	Hspa14:NM_001355397:exon4:c.T152C:p.L51S,Hspa14:NM_015765:exon5:c.T293C:p.L98S	.	het	.	2	3502577	3502577	C	G	het	164.64	16
2	4633497	4633497	A	G	exonic	Prpf18	.	nonsynonymous SNV	Prpf18:NM_026045:exon9:c.A884C:p.E295A,Prpf18:NM_001356451:exon10:c.A911C:p.E304A	.	het	.	2	4633497	4633497	A	G	het	215.64	13
2	5902431	5902431	A	G	exonic	Dhtkd1	.	nonsynonymous SNV	Dhtkd1:NM_001081131:exon15:c.G2473C:p.G825R	.	het	.	2	5902431	5902431	A	G	het	34.64	16
2	5961307	5961307	T	C	exonic	Upf2	.	nonsynonymous SNV	Upf2:NM_001081132:exon3:c.A737C:p.H246P	.	het	.	2	5961307	5961307	T	C	het	245.64	18
2	5961311	5961311	G	A	exonic	Upf2	.	nonsynonymous SNV	Upf2:NM_001081132:exon3:c.C741A:p.F247L	.	het	.	2	5961311	5961311	G	A	het	245.64	18
2	5961330	5961330	T	C	exonic	Upf2	.	nonsynonymous SNV	Upf2:NM_001081132:exon3:c.A760C:p.K254Q	.	het	.	2	5961330	5961330	T	C	het	378.64	23
2	5961341	5961341	C	G	exonic	Upf2	.	nonsynonymous SNV	Upf2:NM_001081132:exon3:c.C771G:p.N257K	.	het	.	2	5961341	5961341	C	G	het	59.64	18
2	5961375	5961375	C	A	exonic	Upf2	.	nonsynonymous SNV	Upf2:NM_001081132:exon3:c.G805A:p.A269T	.	het	.	2	5961375	5961375	C	A	het	134.64	18
2	6100748	6100748	A	G	exonic	Proser2	.	nonsynonymous SNV	Proser2:NM_001159657:exon4:c.G1004C:p.G335A,Proser2:NM_144883:exon4:c.G1004C:p.G335A	.	het	.	2	6100748	6100748	A	G	het	64.64	21
2	9951191	9951191	T	C	exonic	Taf3	.	nonsynonymous SNV	Taf3:NM_027748:exon3:c.A2164G:p.K722E	.	het	.	2	9951191	9951191	T	C	het	136.64	12
2	11674427	11674427	T	C	exonic	Il2ra	.	nonsynonymous SNV	Il2ra:NM_008367:exon2:c.G197C:p.C66S	.	het	.	2	11674427	11674427	T	C	het	82.64	15
2	15869769	15869769	T	G	exonic	Malrd1	.	nonsynonymous SNV	Malrd1:NM_001310455:exon24:c.T4007G:p.I1336R	.	het	.	2	15869769	15869769	T	G	het	82.64	15
2	15869775	15869775	T	A	exonic	Malrd1	.	nonsynonymous SNV	Malrd1:NM_001310455:exon24:c.G4013A:p.S1338N	.	het	.	2	15869775	15869775	T	A	het	79.64	16
2	15869787	15869787	G	C	exonic	Malrd1	.	nonsynonymous SNV	Malrd1:NM_001310455:exon24:c.G4025C:p.S1342T	.	het	.	2	15869787	15869787	G	C	het	68.64	14
2	16101827	16101827	T	C	exonic	Malrd1	.	nonsynonymous SNV	Malrd1:NM_001310455:exon32:c.A5449C:p.T1817P	.	het	.	2	16101827	16101827	T	C	het	25.64	16
2	16101853	16101853	G	A	exonic	Malrd1	.	nonsynonymous SNV	Malrd1:NM_001310455:exon32:c.T5475A:p.S1825R	.	het	.	2	16101853	16101853	G	A	het	217.64	15
2	16101857	16101857	T	G	exonic	Malrd1	.	nonsynonymous SNV	Malrd1:NM_001310455:exon32:c.A5479G:p.S1827G	.	het	.	2	16101857	16101857	T	G	het	217.64	15
2	17388700	17388700	A	G	exonic	Nebl	.	nonsynonymous SNV	Nebl:NM_001362722:exon18:c.A1756C:p.I586L	.	het	.	2	17388700	17388700	A	G	het	127.64	32
2	18122345	18122345	T	G	exonic	Mllt10	.	nonsynonymous SNV	Mllt10:NM_001252560:exon6:c.C506G:p.T169R,Mllt10:NM_010804:exon6:c.C506G:p.T169R,Mllt10:NM_001252561:exon7:c.C272G:p.T91R	.	het	.	2	18122345	18122345	T	G	het	36.64	10
2	18219458	18219458	T	A	exonic	Dnajc1	.	nonsynonymous SNV	Dnajc1:NM_001190817:exon11:c.A1583T:p.K528M,Dnajc1:NM_007869:exon11:c.A1583T:p.K528M	.	het	.	2	18219458	18219458	T	A	het	167.64	26
2	18219464	18219464	T	C	exonic	Dnajc1	.	nonsynonymous SNV	Dnajc1:NM_001190817:exon11:c.C1577G:p.P526R,Dnajc1:NM_007869:exon11:c.C1577G:p.P526R	.	het	.	2	18219464	18219464	T	C	het	142.64	25
2	20519927	20519927	C	G	exonic	Etl4	.	nonsynonymous SNV	Etl4:NM_001177630:exon1:c.C70G:p.Q24E,Etl4:NM_001177631:exon1:c.C70G:p.Q24E,Etl4:NM_001369134:exon1:c.C70G:p.Q24E,Etl4:NM_029895:exon2:c.C70G:p.Q24E,Etl4:NM_178059:exon2:c.C70G:p.Q24E	.	het	.	2	20519927	20519927	C	G	het	34.64	16
2	22423302	22423302	A	G	exonic	Myo3a	.	nonsynonymous SNV	Myo3a:NM_148413:exon20:c.C2369G:p.P790R	.	het	.	2	22423302	22423302	A	G	het	82.64	23
2	22634938	22634938	C	G	exonic	Gad2	.	nonsynonymous SNV	Gad2:NM_008078:exon7:c.A733G:p.I245V	.	het	.	2	22634938	22634938	C	G	het	559.64	17
2	22634988	22634988	C	T	exonic	Gad2	.	nonsynonymous SNV	Gad2:NM_008078:exon7:c.A783T:p.E261D	.	het	.	2	22634988	22634988	C	T	het	274.64	11
2	22634989	22634989	G	C	exonic	Gad2	.	nonsynonymous SNV	Gad2:NM_008078:exon7:c.G784C:p.V262L	.	het	.	2	22634989	22634989	G	C	het	274.64	11
2	22994608	22994608	C	A	exonic	Abi1	.	nonsynonymous SNV	Abi1:NM_001077190:exon2:c.C200T:p.A67V,Abi1:NM_001077192:exon2:c.C200T:p.A67V,Abi1:NM_001077193:exon2:c.C200T:p.A67V,Abi1:NM_001331043:exon2:c.C200T:p.A67V,Abi1:NM_001331044:exon2:c.C200T:p.A67V,Abi1:NM_001331045:exon2:c.C200T:p.A67V,Abi1:NM_001377510:exon2:c.C200T:p.A67V,Abi1:NM_007380:exon2:c.C200T:p.A67V,Abi1:NM_145994:exon2:c.C200T:p.A67V	.	het	.	2	22994608	22994608	C	A	het	95.64	16
2	23099701	23099701	G	C	exonic	Acbd5	.	nonsynonymous SNV	Acbd5:NM_001355642:exon9:c.G972C:p.L324F,Acbd5:NM_001102436:exon10:c.G1191C:p.L397F,Acbd5:NM_001102437:exon10:c.G1302C:p.L434F,Acbd5:NM_001102438:exon10:c.G1299C:p.L433F,Acbd5:NM_001355641:exon10:c.G1005C:p.L335F,Acbd5:NM_028793:exon10:c.G1194C:p.L398F,Acbd5:NM_001355637:exon11:c.G1335C:p.L445F,Acbd5:NM_001355638:exon11:c.G1332C:p.L444F,Acbd5:NM_001355639:exon11:c.G1224C:p.L408F	.	het	.	2	23099701	23099701	G	C	het	34.64	16
2	23099718	23099718	A	G	exonic	Acbd5	.	nonsynonymous SNV	Acbd5:NM_001355642:exon9:c.A989G:p.N330S,Acbd5:NM_001102436:exon10:c.A1208G:p.N403S,Acbd5:NM_001102437:exon10:c.A1319G:p.N440S,Acbd5:NM_001102438:exon10:c.A1316G:p.N439S,Acbd5:NM_001355641:exon10:c.A1022G:p.N341S,Acbd5:NM_028793:exon10:c.A1211G:p.N404S,Acbd5:NM_001355637:exon11:c.A1352G:p.N451S,Acbd5:NM_001355638:exon11:c.A1349G:p.N450S,Acbd5:NM_001355639:exon11:c.A1241G:p.N414S	.	het	.	2	23099718	23099718	A	G	het	49.64	11
2	23099726	23099726	C	A	exonic	Acbd5	.	nonsynonymous SNV	Acbd5:NM_001355642:exon9:c.C997A:p.Q333K,Acbd5:NM_001102436:exon10:c.C1216A:p.Q406K,Acbd5:NM_001102437:exon10:c.C1327A:p.Q443K,Acbd5:NM_001102438:exon10:c.C1324A:p.Q442K,Acbd5:NM_001355641:exon10:c.C1030A:p.Q344K,Acbd5:NM_028793:exon10:c.C1219A:p.Q407K,Acbd5:NM_001355637:exon11:c.C1360A:p.Q454K,Acbd5:NM_001355638:exon11:c.C1357A:p.Q453K,Acbd5:NM_001355639:exon11:c.C1249A:p.Q417K	.	het	.	2	23099726	23099726	C	A	het	49.64	11
2	23139916	23139916	A	G	exonic	Mastl	.	nonsynonymous SNV	Mastl:NM_025979:exon6:c.T797C:p.L266P	.	het	.	2	23139916	23139916	A	G	het	55.64	24
2	23140036	23140036	A	G	exonic	Mastl	.	nonsynonymous SNV	Mastl:NM_025979:exon6:c.A677C:p.K226T	.	het	.	2	23140036	23140036	A	G	het	65.64	29
2	23172956	23172956	A	C	exonic	Yme1l1	.	nonsynonymous SNV	Yme1l1:NM_013771:exon6:c.G538C:p.G180R	.	het	.	2	23172956	23172956	A	C	het	20.64	32
2	23186990	23186990	G	C	exonic	Yme1l1	.	nonsynonymous SNV	Yme1l1:NM_013771:exon11:c.A1224C:p.E408D	.	het	.	2	23186990	23186990	G	C	het	140.64	12
2	23545231	23545231	0	G	exonic	Spopl	.	nonsynonymous SNV	Spopl:NM_029773:exon3:c.T122C:p.F41S	.	het	.	2	23545231	23545231	-	G	het	61.60	22
2	24003679	24003679	C	T	exonic	Hnmt	.	nonsynonymous SNV	Hnmt:NM_080462:exon7:c.C802A:p.Q268K	.	het	.	2	24003679	24003679	C	T	het	106.64	22
2	24003682	24003682	G	A	exonic	Hnmt	.	nonsynonymous SNV	Hnmt:NM_080462:exon7:c.C799T:p.L267F	.	het	.	2	24003682	24003682	G	A	het	106.64	22
2	24805076	24805076	A	C	exonic	Ehmt1	.	nonsynonymous SNV	Ehmt1:NM_001109686:exon19:c.C2868G:p.S956R,Ehmt1:NM_001109687:exon19:c.C2883G:p.S961R,Ehmt1:NM_001012518:exon20:c.C3027G:p.S1009R,Ehmt1:NM_172545:exon20:c.C3006G:p.S1002R	.	het	.	2	24805076	24805076	A	C	het	208.64	18
2	24805077	24805077	T	A	exonic	Ehmt1	.	nonsynonymous SNV	Ehmt1:NM_001109686:exon19:c.G2867T:p.S956I,Ehmt1:NM_001109687:exon19:c.G2882T:p.S961I,Ehmt1:NM_001012518:exon20:c.G3026T:p.S1009I,Ehmt1:NM_172545:exon20:c.G3005T:p.S1002I	.	het	.	2	24805077	24805077	T	A	het	208.64	18
2	25229182	25229182	A	C	exonic	Slc34a3	.	nonsynonymous SNV	Slc34a3:NM_080854:exon13:c.C1675G:p.H559D,Slc34a3:NM_001362748:exon14:c.C1495G:p.H499D	.	het	.	2	25229182	25229182	A	C	het	41.64	22
2	25273146	25273146	C	A	exonic	Anapc2	.	nonsynonymous SNV	Anapc2:NM_175300:exon2:c.C394A:p.L132M	.	het	.	2	25273146	25273146	C	A	het	23.64	14
2	25278383	25278383	C	T	exonic	Anapc2	.	nonsynonymous SNV	Anapc2:NM_175300:exon7:c.C1391T:p.T464I	.	het	.	2	25278383	25278383	C	T	het	586.64	27
2	25278394	25278394	C	A	exonic	Anapc2	.	nonsynonymous SNV	Anapc2:NM_175300:exon7:c.G1402A:p.A468T	.	het	.	2	25278394	25278394	C	A	het	208.64	18
2	25407850	25407850	A	G	exonic	Npdc1	.	nonsynonymous SNV	Npdc1:NM_008721:exon4:c.T410G:p.L137R	.	het	.	2	25407850	25407850	A	G	het	234.64	22
2	25407870	25407870	C	G	exonic	Npdc1	.	nonsynonymous SNV	Npdc1:NM_008721:exon4:c.C430G:p.Q144E	.	het	.	2	25407870	25407870	C	G	het	247.64	17
2	25425467	25425467	C	T	exonic	Fut7	.	nonsynonymous SNV	Fut7:NM_001177366:exon2:c.G736T:p.V246L,Fut7:NM_001177367:exon3:c.G595T:p.V199L,Fut7:NM_001289455:exon3:c.G595T:p.V199L,Fut7:NM_013524:exon3:c.G595T:p.V199L,Fut7:NM_001289453:exon4:c.G595T:p.V199L,Fut7:NM_001289454:exon4:c.G595T:p.V199L,Fut7:NM_001289456:exon4:c.G595T:p.V199L	.	het	.	2	25425467	25425467	C	T	het	130.64	14
2	25425468	25425468	G	A	exonic	Fut7	.	nonsynonymous SNV	Fut7:NM_001177366:exon2:c.T737A:p.V246E,Fut7:NM_001177367:exon3:c.T596A:p.V199E,Fut7:NM_001289455:exon3:c.T596A:p.V199E,Fut7:NM_013524:exon3:c.T596A:p.V199E,Fut7:NM_001289453:exon4:c.T596A:p.V199E,Fut7:NM_001289454:exon4:c.T596A:p.V199E,Fut7:NM_001289456:exon4:c.T596A:p.V199E	.	het	.	2	25425468	25425468	G	A	het	130.64	14
2	25425478	25425478	G	A	exonic	Fut7	.	nonsynonymous SNV	Fut7:NM_001177366:exon2:c.C747A:p.F249L,Fut7:NM_001177367:exon3:c.C606A:p.F202L,Fut7:NM_001289455:exon3:c.C606A:p.F202L,Fut7:NM_013524:exon3:c.C606A:p.F202L,Fut7:NM_001289453:exon4:c.C606A:p.F202L,Fut7:NM_001289454:exon4:c.C606A:p.F202L,Fut7:NM_001289456:exon4:c.C606A:p.F202L	.	het	.	2	25425478	25425478	G	A	het	94.64	11
2	25425513	25425513	G	T	exonic	Fut7	.	nonsynonymous SNV	Fut7:NM_001177366:exon2:c.G782T:p.C261F,Fut7:NM_001177367:exon3:c.G641T:p.C214F,Fut7:NM_001289455:exon3:c.G641T:p.C214F,Fut7:NM_013524:exon3:c.G641T:p.C214F,Fut7:NM_001289453:exon4:c.G641T:p.C214F,Fut7:NM_001289454:exon4:c.G641T:p.C214F,Fut7:NM_001289456:exon4:c.G641T:p.C214F	.	het	.	2	25425513	25425513	G	T	het	136.64	12
2	25425522	25425522	G	T	exonic	Fut7	.	nonsynonymous SNV	Fut7:NM_001177366:exon2:c.C791T:p.P264L,Fut7:NM_001177367:exon3:c.C650T:p.P217L,Fut7:NM_001289455:exon3:c.C650T:p.P217L,Fut7:NM_013524:exon3:c.C650T:p.P217L,Fut7:NM_001289453:exon4:c.C650T:p.P217L,Fut7:NM_001289454:exon4:c.C650T:p.P217L,Fut7:NM_001289456:exon4:c.C650T:p.P217L	.	het	.	2	25425522	25425522	G	T	het	223.64	13
2	25443561	25443561	C	G	exonic	Abca2	.	nonsynonymous SNV	Abca2:NM_001368624:exon31:c.A5114G:p.K1705R,Abca2:NM_007379:exon31:c.A5111G:p.K1704R	.	het	.	2	25443561	25443561	C	G	het	49.64	11
2	25443773	25443773	C	G	exonic	Abca2	.	nonsynonymous SNV	Abca2:NM_001368624:exon32:c.C5235G:p.N1745K,Abca2:NM_007379:exon32:c.C5232G:p.N1744K	.	het	.	2	25443773	25443773	C	G	het	42.64	12
2	25443784	25443784	T	C	exonic	Abca2	.	nonsynonymous SNV	Abca2:NM_001368624:exon32:c.A5246C:p.N1749T,Abca2:NM_007379:exon32:c.A5243C:p.N1748T	.	het	.	2	25443784	25443784	T	C	het	30.64	12
2	25564581	25564581	A	G	exonic	Mamdc4	.	nonsynonymous SNV	Mamdc4:NM_001081199:exon25:c.A3218C:p.H1073P	.	het	.	2	25564581	25564581	A	G	het	52.64	10
2	26202396	26202396	A	G	exonic	Lhx3	.	nonsynonymous SNV	Lhx3:NM_001039653:exon4:c.G575C:p.R192P,Lhx3:NM_010711:exon4:c.G569C:p.R190P	.	het	.	2	26202396	26202396	A	G	het	67.64	20
2	26202421	26202421	A	G	exonic	Lhx3	.	nonsynonymous SNV	Lhx3:NM_001039653:exon4:c.T550C:p.S184P,Lhx3:NM_010711:exon4:c.T544C:p.S182P	.	het	.	2	26202421	26202421	A	G	het	79.64	16
2	26202425	26202425	C	T	exonic	Lhx3	.	nonsynonymous SNV	Lhx3:NM_001039653:exon4:c.C546A:p.N182K,Lhx3:NM_010711:exon4:c.C540A:p.N180K	.	het	.	2	26202425	26202425	C	T	het	79.64	16
2	26202430	26202430	C	T	exonic	Lhx3	.	nonsynonymous SNV	Lhx3:NM_001039653:exon4:c.T541A:p.Y181N,Lhx3:NM_010711:exon4:c.T535A:p.Y179N	.	het	.	2	26202430	26202430	C	T	het	37.64	15
2	26202442	26202442	C	T	exonic	Lhx3	.	nonsynonymous SNV	Lhx3:NM_001039653:exon4:c.C529A:p.L177M,Lhx3:NM_010711:exon4:c.C523A:p.L175M	.	het	.	2	26202442	26202442	C	T	het	214.64	16
2	28739548	28739548	A	G	exonic	Ak8	.	nonsynonymous SNV	Ak8:NM_001033874:exon9:c.A773G:p.Q258R	.	het	.	2	28739548	28739548	A	G	het	92.64	24
2	28739562	28739562	G	A	exonic	Ak8	.	nonsynonymous SNV	Ak8:NM_001033874:exon9:c.T787A:p.C263S	.	het	.	2	28739562	28739562	G	A	het	138.64	27
2	30017259	30017259	T	C	exonic	Sptan1	.	nonsynonymous SNV	Sptan1:NM_001177668:exon39:c.T5045C:p.L1682P,Sptan1:NM_001369325:exon39:c.T5090C:p.L1697P,Sptan1:NM_001177667:exon40:c.T5105C:p.L1702P,Sptan1:NM_001309460:exon40:c.T5105C:p.L1702P	.	het	.	2	30017259	30017259	T	C	het	41.64	44
2	30017283	30017283	0	T	exonic	Sptan1	.	nonsynonymous SNV	Sptan1:NM_001177668:exon39:c.C5069T:p.A1690V,Sptan1:NM_001369325:exon39:c.C5114T:p.A1705V,Sptan1:NM_001177667:exon40:c.C5129T:p.A1710V,Sptan1:NM_001309460:exon40:c.C5129T:p.A1710V	.	het	.	2	30017283	30017283	-	T	het	416.60	40
2	30079550	30079550	C	T	exonic	Pkn3	.	nonsynonymous SNV	Pkn3:NM_153805:exon2:c.G32T:p.R11I	.	het	.	2	30079550	30079550	C	T	het	22.64	20
2	30312684	30312684	A	G	exonic	Nup188	.	nonsynonymous SNV	Nup188:NM_198304:exon12:c.C1198G:p.Q400E	.	het	.	2	30312684	30312684	A	G	het	58.64	23
2	30322505	30322505	G	A	exonic	Nup188	.	nonsynonymous SNV	Nup188:NM_198304:exon18:c.C1816A:p.P606T	.	het	.	2	30322505	30322505	G	A	het	49.64	11
2	30322506	30322506	T	A	exonic	Nup188	.	nonsynonymous SNV	Nup188:NM_198304:exon18:c.C1817A:p.P606H	.	het	.	2	30322506	30322506	T	A	het	49.64	11
2	30340716	30340716	T	A	exonic	Nup188	.	nonsynonymous SNV	Nup188:NM_198304:exon37:c.T4265A:p.F1422Y	.	het	.	2	30340716	30340716	T	A	het	22.64	11
2	30797892	30797892	G	A	exonic	1700001O22Rik	.	nonsynonymous SNV	1700001O22Rik:NM_198000:exon4:c.C688T:p.R230W	.	het	.	2	30797892	30797892	G	A	het	25.64	19
2	30797907	30797907	C	T	exonic	1700001O22Rik	.	nonsynonymous SNV	1700001O22Rik:NM_198000:exon4:c.C673A:p.Q225K	.	het	.	2	30797907	30797907	C	T	het	82.64	15
2	30797909	30797909	G	T	exonic	1700001O22Rik	.	nonsynonymous SNV	1700001O22Rik:NM_198000:exon4:c.T671A:p.L224Q	.	het	.	2	30797909	30797909	G	T	het	82.64	15
2	31004973	31004973	T	C	exonic	Usp20	.	nonsynonymous SNV	Usp20:NM_028846:exon8:c.A469C:p.N157H	.	het	.	2	31004973	31004973	T	C	het	170.64	10
2	31412552	31412552	G	A	exonic	Hmcn2	.	nonsynonymous SNV	Hmcn2:NM_001370902:exon57:c.T8797A:p.F2933I	.	het	.	2	31412552	31412552	G	A	het	217.64	15
2	31412568	31412568	A	T	exonic	Hmcn2	.	nonsynonymous SNV	Hmcn2:NM_001370902:exon57:c.A8813T:p.Q2938L	.	het	.	2	31412568	31412568	A	T	het	499.64	23
2	31413332	31413332	C	A	exonic	Hmcn2	.	nonsynonymous SNV	Hmcn2:NM_001370902:exon58:c.T8894A:p.V2965D	.	het	.	2	31413332	31413332	C	A	het	388.64	33
2	31413335	31413335	T	C	exonic	Hmcn2	.	nonsynonymous SNV	Hmcn2:NM_001370902:exon58:c.A8897C:p.Y2966S	.	het	.	2	31413335	31413335	T	C	het	388.64	33
2	31430426	31430426	A	G	exonic	Hmcn2	.	nonsynonymous SNV	Hmcn2:NM_001370902:exon78:c.A11843G:p.H3948R	.	het	.	2	31430426	31430426	A	G	het	298.64	18
2	31430430	31430430	G	A	exonic	Hmcn2	.	nonsynonymous SNV	Hmcn2:NM_001370902:exon78:c.G11847A:p.M3949I	.	het	.	2	31430430	31430430	G	A	het	295.64	19
2	31430432	31430432	G	A	exonic	Hmcn2	.	nonsynonymous SNV	Hmcn2:NM_001370902:exon78:c.T11849A:p.V3950D	.	het	.	2	31430432	31430432	G	A	het	295.64	19
2	31460378	31460378	G	A	exonic	Hmcn2	.	nonsynonymous SNV	Hmcn2:NM_001370902:exon98:c.T15211A:p.S5071T	.	het	.	2	31460378	31460378	G	A	het	566.64	20
2	31816694	31816694	A	G	exonic	Fibcd1	.	nonsynonymous SNV	Fibcd1:NM_178887:exon7:c.A1124C:p.D375A	.	het	.	2	31816694	31816694	A	G	het	66.64	20
2	31930734	31930734	T	A	exonic	Lamc3	.	nonsynonymous SNV	Lamc3:NM_011836:exon22:c.G3760A:p.G1254S	.	het	.	2	31930734	31930734	T	A	het	43.64	10
2	31930743	31930743	G	A	exonic	Lamc3	.	nonsynonymous SNV	Lamc3:NM_011836:exon22:c.G3769A:p.A1257T	.	het	.	2	31930743	31930743	G	A	het	109.64	10
2	32017248	32017248	G	A	exonic	Nup214	.	nonsynonymous SNV	Nup214:NM_172268:exon22:c.C3086A:p.S1029Y	.	het	.	2	32017248	32017248	G	A	het	97.64	10
2	32033290	32033290	T	C	exonic	Nup214	.	nonsynonymous SNV	Nup214:NM_172268:exon29:c.G3830C:p.G1277A	.	het	.	2	32033290	32033290	T	C	het	28.64	15
2	32033535	32033535	T	C	exonic	Nup214	.	nonsynonymous SNV	Nup214:NM_172268:exon29:c.A4075C:p.K1359Q	.	het	.	2	32033535	32033535	T	C	het	118.64	48
2	32033569	32033569	C	A	exonic	Nup214	.	nonsynonymous SNV	Nup214:NM_172268:exon29:c.C4109A:p.A1370D	.	het	.	2	32033569	32033569	C	A	het	115.64	34
2	32033577	32033577	T	G	exonic	Nup214	.	nonsynonymous SNV	Nup214:NM_172268:exon29:c.C4117G:p.Q1373E	.	het	.	2	32033577	32033577	T	G	het	112.64	35
2	32033603	32033603	G	A	exonic	Nup214	.	nonsynonymous SNV	Nup214:NM_172268:exon29:c.C4143A:p.S1381R	.	het	.	2	32033603	32033603	G	A	het	48.64	30
2	32033606	32033606	T	A	exonic	Nup214	.	nonsynonymous SNV	Nup214:NM_172268:exon29:c.T4146A:p.F1382L	.	het	.	2	32033606	32033606	T	A	het	127.64	30
2	32033626	32033626	G	T	exonic	Nup214	.	nonsynonymous SNV	Nup214:NM_172268:exon29:c.G4166T:p.G1389V	.	het	.	2	32033626	32033626	G	T	het	172.64	30
2	32034216	32034216	0	C	exonic	Nup214	.	nonsynonymous SNV	Nup214:NM_172268:exon29:c.A4756C:p.S1586R	.	het	.	2	32034216	32034216	-	C	het	40.60	14
2	32034337	32034337	G	A	exonic	Nup214	.	nonsynonymous SNV	Nup214:NM_172268:exon29:c.C4877A:p.T1626N	.	het	.	2	32034337	32034337	G	A	het	49.64	26
2	32213997	32213997	C	T	exonic	Prrc2b	.	nonsynonymous SNV	Prrc2b:NM_001159634:exon16:c.G3486T:p.R1162S	.	het	.	2	32213997	32213997	C	T	het	367.64	25
2	32213998	32213998	A	G	exonic	Prrc2b	.	nonsynonymous SNV	Prrc2b:NM_001159634:exon16:c.C3487G:p.R1163G	.	het	.	2	32213998	32213998	A	G	het	367.64	25
2	32214199	32214199	A	C	exonic	Prrc2b	.	nonsynonymous SNV	Prrc2b:NM_001159634:exon16:c.G3688C:p.V1230L	.	het	.	2	32214199	32214199	A	C	het	47.64	11
2	32214224	32214224	C	T	exonic	Prrc2b	.	nonsynonymous SNV	Prrc2b:NM_001159634:exon16:c.A3713T:p.Q1238L	.	het	.	2	32214224	32214224	C	T	het	468.64	19
2	32214247	32214247	A	G	exonic	Prrc2b	.	nonsynonymous SNV	Prrc2b:NM_001159634:exon16:c.T3736G:p.W1246G	.	het	.	2	32214247	32214247	A	G	het	193.64	23
2	32214280	32214280	C	T	exonic	Prrc2b	.	nonsynonymous SNV	Prrc2b:NM_001159634:exon16:c.C3769T:p.P1257S	.	het	.	2	32214280	32214280	C	T	het	178.64	27
2	32214315	32214315	G	A	exonic	Prrc2b	.	nonsynonymous SNV	Prrc2b:NM_001159634:exon16:c.C3804A:p.D1268E	.	het	.	2	32214315	32214315	G	A	het	136.64	27
2	32214319	32214319	A	G	exonic	Prrc2b	.	nonsynonymous SNV	Prrc2b:NM_001159634:exon16:c.T3808G:p.Y1270D	.	het	.	2	32214319	32214319	A	G	het	136.64	27
2	32258664	32258664	T	C	exonic	Uck1	.	nonsynonymous SNV	Uck1:NM_001378791:exon3:c.C290G:p.A97G,Uck1:NM_001378792:exon3:c.C143G:p.A48G,Uck1:NM_011675:exon3:c.C290G:p.A97G	.	het	.	2	32258664	32258664	T	C	het	292.64	20
2	32258665	32258665	G	A	exonic	Uck1	.	nonsynonymous SNV	Uck1:NM_001378791:exon3:c.G289T:p.A97S,Uck1:NM_001378792:exon3:c.G142T:p.A48S,Uck1:NM_011675:exon3:c.G289T:p.A97S	.	het	.	2	32258665	32258665	G	A	het	292.64	20
2	32259970	32259970	C	T	exonic	Uck1	.	nonsynonymous SNV	Uck1:NM_001378791:exon1:c.C65A:p.A22D,Uck1:NM_011675:exon1:c.C65A:p.A22D	.	het	.	2	32259970	32259970	C	T	het	184.64	11
2	32259972	32259972	C	A	exonic	Uck1	.	nonsynonymous SNV	Uck1:NM_001378791:exon1:c.G63T:p.E21D,Uck1:NM_011675:exon1:c.G63T:p.E21D	.	het	.	2	32259972	32259972	C	A	het	184.64	11
2	32619630	32619630	A	C	exonic	St6galnac6	.	nonsynonymous SNV	St6galnac6:NM_001289548:exon6:c.T997C:p.F333L,St6galnac6:NM_001289547:exon7:c.T1099C:p.F367L	.	het	.	2	32619630	32619630	A	C	het	40.64	11
2	32677660	32677660	A	C	exonic	Eng	.	nonsynonymous SNV	Eng:NM_001146348:exon9:c.G1239C:p.M413I,Eng:NM_001146350:exon9:c.G1242C:p.M414I,Eng:NM_007932:exon9:c.G1242C:p.M414I	.	het	.	2	32677660	32677660	A	C	het	35.64	16
2	32761518	32761518	C	G	exonic	Tor2a	.	nonsynonymous SNV	Tor2a:NM_001369225:exon4:c.C616G:p.H206D,Tor2a:NM_001369222:exon5:c.C747G:p.I249M,Tor2a:NM_001369223:exon5:c.C741G:p.I247M,Tor2a:NM_001369224:exon5:c.C748G:p.H250D,Tor2a:NM_152800:exon5:c.C744G:p.I248M	.	het	.	2	32761518	32761518	C	G	het	25.64	16
2	32761519	32761519	A	G	exonic	Tor2a	.	nonsynonymous SNV	Tor2a:NM_001369225:exon4:c.A617G:p.H206R,Tor2a:NM_001369222:exon5:c.A748G:p.M250V,Tor2a:NM_001369223:exon5:c.A742G:p.M248V,Tor2a:NM_001369224:exon5:c.A749G:p.H250R,Tor2a:NM_152800:exon5:c.A745G:p.M249V	.	het	.	2	32761519	32761519	A	G	het	254.64	16
2	32775837	32775837	G	A	exonic	Ptrh1	.	nonsynonymous SNV	Ptrh1:NM_178595:exon1:c.G8A:p.R3Q	.	het	.	2	32775837	32775837	G	A	het	73.64	22
2	32775853	32775853	T	A	exonic	Ptrh1	.	nonsynonymous SNV	Ptrh1:NM_178595:exon1:c.C24A:p.S8R	.	het	.	2	32775853	32775853	T	A	het	148.64	23
2	32926781	32926781	A	G	exonic	Lrsam1	.	nonsynonymous SNV	Lrsam1:NM_001379443:exon24:c.A2041C:p.S681R,Lrsam1:NM_001379440:exon25:c.A2179C:p.S727R,Lrsam1:NM_001379441:exon25:c.A2122C:p.S708R,Lrsam1:NM_001379442:exon25:c.A2098C:p.S700R,Lrsam1:NM_001379439:exon26:c.A2179C:p.S727R,Lrsam1:NM_199302:exon26:c.A2179C:p.S727R	.	het	.	2	32926781	32926781	A	G	het	178.64	13
2	32926784	32926784	G	A	exonic	Lrsam1	.	nonsynonymous SNV	Lrsam1:NM_001379443:exon24:c.A2038T:p.S680C,Lrsam1:NM_001379440:exon25:c.A2176T:p.S726C,Lrsam1:NM_001379441:exon25:c.A2119T:p.S707C,Lrsam1:NM_001379442:exon25:c.A2095T:p.S699C,Lrsam1:NM_001379439:exon26:c.A2176T:p.S726C,Lrsam1:NM_199302:exon26:c.A2176T:p.S726C	.	het	.	2	32926784	32926784	G	A	het	178.64	13
2	32926787	32926787	C	A	exonic	Lrsam1	.	nonsynonymous SNV	Lrsam1:NM_001379443:exon24:c.C2035T:p.H679Y,Lrsam1:NM_001379440:exon25:c.C2173T:p.H725Y,Lrsam1:NM_001379441:exon25:c.C2116T:p.H706Y,Lrsam1:NM_001379442:exon25:c.C2092T:p.H698Y,Lrsam1:NM_001379439:exon26:c.C2173T:p.H725Y,Lrsam1:NM_199302:exon26:c.C2173T:p.H725Y	.	het	.	2	32926787	32926787	C	A	het	178.64	13
2	32986676	32986676	C	G	exonic	Garnl3	.	nonsynonymous SNV	Garnl3:NM_001355202:exon29:c.G2521C:p.D841H,Garnl3:NM_178888:exon29:c.G2962C:p.D988H,Garnl3:NM_001355200:exon30:c.G3217C:p.D1073H,Garnl3:NM_001355201:exon30:c.G3097C:p.D1033H	.	het	.	2	32986676	32986676	C	G	het	301.64	16
2	33246108	33246108	C	T	exonic	Angptl2	.	nonsynonymous SNV	Angptl2:NM_011923:exon5:c.A1304T:p.K435M	.	het	.	2	33246108	33246108	C	T	het	202.64	20
2	34597468	34597468	T	C	exonic	Mapkap1	.	nonsynonymous SNV	Mapkap1:NM_001290626:exon9:c.A677C:p.K226T,Mapkap1:NM_001362921:exon9:c.A1145C:p.K382T,Mapkap1:NM_001290625:exon10:c.A1253C:p.K418T,Mapkap1:NM_001362920:exon10:c.A677C:p.K226T,Mapkap1:NM_177345:exon10:c.A1253C:p.K418T,Mapkap1:NM_001362919:exon11:c.A1253C:p.K418T	.	het	.	2	34597468	34597468	T	C	het	49.64	11
2	34597469	34597469	C	T	exonic	Mapkap1	.	nonsynonymous SNV	Mapkap1:NM_001290626:exon9:c.A678T:p.K226N,Mapkap1:NM_001362921:exon9:c.A1146T:p.K382N,Mapkap1:NM_001290625:exon10:c.A1254T:p.K418N,Mapkap1:NM_001362920:exon10:c.A678T:p.K226N,Mapkap1:NM_177345:exon10:c.A1254T:p.K418N,Mapkap1:NM_001362919:exon11:c.A1254T:p.K418N	.	het	.	2	34597469	34597469	C	T	het	49.64	11
2	35119941	35119941	C	G	exonic	Cntrl	.	nonsynonymous SNV	Cntrl:NM_001379274:exon6:c.A626G:p.Q209R,Cntrl:NM_012018:exon6:c.A626G:p.Q209R	.	het	.	2	35119941	35119941	C	G	het	49.64	11
2	35284027	35284027	C	A	exonic	Gsn	.	nonsynonymous SNV	Gsn:NM_001206368:exon2:c.C114A:p.F38L,Gsn:NM_001206369:exon2:c.C114A:p.F38L,Gsn:NM_146120:exon2:c.C261A:p.F87L,Gsn:NM_001206367:exon3:c.C114A:p.F38L,Gsn:NM_001362948:exon3:c.C114A:p.F38L,Gsn:NM_001362945:exon4:c.C147A:p.F49L,Gsn:NM_001362947:exon4:c.C147A:p.F49L	.	het	.	2	35284027	35284027	C	A	het	49.64	26
2	35284029	35284029	T	A	exonic	Gsn	.	nonsynonymous SNV	Gsn:NM_001206368:exon2:c.T116A:p.F39Y,Gsn:NM_001206369:exon2:c.T116A:p.F39Y,Gsn:NM_146120:exon2:c.T263A:p.F88Y,Gsn:NM_001206367:exon3:c.T116A:p.F39Y,Gsn:NM_001362948:exon3:c.T116A:p.F39Y,Gsn:NM_001362945:exon4:c.T149A:p.F50Y,Gsn:NM_001362947:exon4:c.T149A:p.F50Y	.	het	.	2	35284029	35284029	T	A	het	49.64	26
2	35284709	35284709	G	A	exonic	Gsn	.	nonsynonymous SNV	Gsn:NM_001206368:exon3:c.G232A:p.A78T,Gsn:NM_001206369:exon3:c.G232A:p.A78T,Gsn:NM_146120:exon3:c.G379A:p.A127T,Gsn:NM_001206367:exon4:c.G232A:p.A78T,Gsn:NM_001362948:exon4:c.G232A:p.A78T,Gsn:NM_001362945:exon5:c.G265A:p.A89T,Gsn:NM_001362947:exon5:c.G265A:p.A89T	.	het	.	2	35284709	35284709	G	A	het	88.64	13
2	35284713	35284713	C	A	exonic	Gsn	.	nonsynonymous SNV	Gsn:NM_001206368:exon3:c.T236A:p.I79N,Gsn:NM_001206369:exon3:c.T236A:p.I79N,Gsn:NM_146120:exon3:c.T383A:p.I128N,Gsn:NM_001206367:exon4:c.T236A:p.I79N,Gsn:NM_001362948:exon4:c.T236A:p.I79N,Gsn:NM_001362945:exon5:c.T269A:p.I90N,Gsn:NM_001362947:exon5:c.T269A:p.I90N	.	het	.	2	35284713	35284713	C	A	het	88.64	13
2	36177249	36177249	A	G	exonic	Mrrf	.	nonsynonymous SNV	Mrrf:NM_026422:exon6:c.A686G:p.D229G	.	het	.	2	36177249	36177249	A	G	het	57.04	26
2	36479263	36479263	G	C	exonic	Olfr341	.	nonsynonymous SNV	Olfr341:NM_146950:exon1:c.T866G:p.I289S	.	het	.	2	36479263	36479263	G	C	het	127.64	23
2	36479429	36479429	G	A	exonic	Olfr341	.	nonsynonymous SNV	Olfr341:NM_146950:exon1:c.A700T:p.I234F	.	het	.	2	36479429	36479429	G	A	het	277.64	25
2	36479431	36479431	A	G	exonic	Olfr341	.	nonsynonymous SNV	Olfr341:NM_146950:exon1:c.G698C:p.G233A	.	het	.	2	36479431	36479431	A	G	het	277.64	25
2	36859466	36859466	A	G	exonic	Olfr351	.	nonsynonymous SNV	Olfr351:NM_146942:exon1:c.A881C:p.D294A	.	het	.	2	36859466	36859466	A	G	het	30.64	13
2	36859866	36859866	A	G	exonic	Olfr351	.	nonsynonymous SNV	Olfr351:NM_146942:exon1:c.A481C:p.M161L	.	het	.	2	36859866	36859866	A	G	het	72.64	28
2	36860180	36860180	C	T	exonic	Olfr351	.	nonsynonymous SNV	Olfr351:NM_146942:exon1:c.C167A:p.P56H	.	het	.	2	36860180	36860180	C	T	het	70.64	34
2	36870129	36870129	A	G	exonic	Olfr352	.	nonsynonymous SNV	Olfr352:NM_146940:exon1:c.C562G:p.L188V	.	het	.	2	36870129	36870129	A	G	het	20.64	15
2	36870160	36870160	C	G	exonic	Olfr352	.	nonsynonymous SNV	Olfr352:NM_146940:exon1:c.A593G:p.N198S	.	het	.	2	36870160	36870160	C	G	het	65.64	22
2	36870285	36870285	A	T	exonic	Olfr352	.	nonsynonymous SNV	Olfr352:NM_146940:exon1:c.G718T:p.A240S	.	het	.	2	36870285	36870285	A	T	het	31.64	17
2	36907051	36907051	T	A	exonic	Olfr354	.	nonsynonymous SNV	Olfr354:NM_146939:exon1:c.T104A:p.L35Q	.	het	.	2	36907051	36907051	T	A	het	40.64	14
2	36907056	36907056	T	C	exonic	Olfr354	.	nonsynonymous SNV	Olfr354:NM_146939:exon1:c.A109C:p.M37L	.	het	.	2	36907056	36907056	T	C	het	40.64	14
2	36907319	36907319	C	G	exonic	Olfr354	.	nonsynonymous SNV	Olfr354:NM_146939:exon1:c.C372G:p.D124E	.	het	.	2	36907319	36907319	C	G	het	31.64	17
2	36907354	36907354	T	C	exonic	Olfr354	.	nonsynonymous SNV	Olfr354:NM_146939:exon1:c.G407C:p.S136T	.	het	.	2	36907354	36907354	T	C	het	30.64	13
2	36907485	36907485	G	A	exonic	Olfr354	.	nonsynonymous SNV	Olfr354:NM_146939:exon1:c.T538A:p.F180I	.	het	.	2	36907485	36907485	G	A	het	66.64	19
2	37201661	37201661	T	A	exonic	Olfr365	.	nonsynonymous SNV	Olfr365:NM_146662:exon1:c.C419A:p.P140Q	.	het	.	2	37201661	37201661	T	A	het	61.64	15
2	37495611	37495611	G	A	exonic	Rabgap1	.	nonsynonymous SNV	Rabgap1:NM_001033960:exon11:c.C1388A:p.A463D,Rabgap1:NM_001362956:exon11:c.C1388A:p.A463D,Rabgap1:NM_001362957:exon11:c.C1388A:p.A463D,Rabgap1:NM_001362958:exon11:c.C1184A:p.A395D,Rabgap1:NM_146121:exon11:c.C1388A:p.A463D	.	het	.	2	37495611	37495611	G	A	het	53.64	21
2	37495619	37495619	C	A	exonic	Rabgap1	.	nonsynonymous SNV	Rabgap1:NM_001033960:exon11:c.T1396A:p.L466I,Rabgap1:NM_001362956:exon11:c.T1396A:p.L466I,Rabgap1:NM_001362957:exon11:c.T1396A:p.L466I,Rabgap1:NM_001362958:exon11:c.T1192A:p.L398I,Rabgap1:NM_146121:exon11:c.T1396A:p.L466I	.	het	.	2	37495619	37495619	C	A	het	53.64	21
2	38738889	38738889	T	C	exonic	Nr6a1	.	nonsynonymous SNV	Nr6a1:NM_001159548:exon6:c.C951G:p.H317Q,Nr6a1:NM_001159549:exon6:c.C948G:p.H316Q,Nr6a1:NM_010264:exon8:c.C1122G:p.H374Q	.	het	.	2	38738889	38738889	T	C	het	121.64	17
2	38738890	38738890	G	A	exonic	Nr6a1	.	nonsynonymous SNV	Nr6a1:NM_001159548:exon6:c.A950T:p.H317L,Nr6a1:NM_001159549:exon6:c.A947T:p.H316L,Nr6a1:NM_010264:exon8:c.A1121T:p.H374L	.	het	.	2	38738890	38738890	G	A	het	256.64	17
2	38738908	38738908	T	C	exonic	Nr6a1	.	nonsynonymous SNV	Nr6a1:NM_001159548:exon6:c.C932G:p.P311R,Nr6a1:NM_001159549:exon6:c.C929G:p.P310R,Nr6a1:NM_010264:exon8:c.C1103G:p.P368R	.	het	.	2	38738908	38738908	T	C	het	77.64	13
2	39121164	39121164	T	C	exonic	Scai	.	nonsynonymous SNV	Scai:NM_178778:exon6:c.C459G:p.F153L	.	het	.	2	39121164	39121164	T	C	het	95.64	34
2	39121193	39121193	T	C	exonic	Scai	.	nonsynonymous SNV	Scai:NM_178778:exon6:c.A430G:p.T144A	.	het	.	2	39121193	39121193	T	C	het	149.64	37
2	40597059	40597059	G	A	exonic	Lrp1b	.	nonsynonymous SNV	Lrp1b:NM_053011:exon91:c.A13675T:p.N4559Y	.	het	.	2	40597059	40597059	G	A	het	33.64	12
2	40725469	40725469	G	A	exonic	Lrp1b	.	nonsynonymous SNV	Lrp1b:NM_053011:exon71:c.A10921T:p.N3641Y	.	het	.	2	40725469	40725469	G	A	het	31.64	13
2	40725903	40725903	A	G	exonic	Lrp1b	.	nonsynonymous SNV	Lrp1b:NM_053011:exon70:c.T10820C:p.L3607P	.	het	.	2	40725903	40725903	A	G	het	180.64	38
2	49947526	49947526	T	C	exonic	Lypd6b	.	nonsynonymous SNV	Lypd6b:NM_001379387:exon6:c.G452C:p.S151T,Lypd6b:NM_001379382:exon7:c.G452C:p.S151T,Lypd6b:NM_001379383:exon7:c.G452C:p.S151T,Lypd6b:NM_001379384:exon7:c.G452C:p.S151T,Lypd6b:NM_001379381:exon8:c.G452C:p.S151T,Lypd6b:NM_001379386:exon8:c.G452C:p.S151T,Lypd6b:NM_001379385:exon9:c.G452C:p.S151T,Lypd6b:NM_027990:exon10:c.G452C:p.S151T	.	het	.	2	49947526	49947526	T	C	het	142.64	18
2	49947585	49947585	T	A	exonic	Lypd6b	.	nonsynonymous SNV	Lypd6b:NM_001379387:exon6:c.T511A:p.L171M,Lypd6b:NM_001379382:exon7:c.T511A:p.L171M,Lypd6b:NM_001379383:exon7:c.T511A:p.L171M,Lypd6b:NM_001379384:exon7:c.T511A:p.L171M,Lypd6b:NM_001379381:exon8:c.T511A:p.L171M,Lypd6b:NM_001379386:exon8:c.T511A:p.L171M,Lypd6b:NM_001379385:exon9:c.T511A:p.L171M,Lypd6b:NM_027990:exon10:c.T511A:p.L171M	.	het	.	2	49947585	49947585	T	A	het	85.64	22
2	51148757	51148757	T	A	exonic	Rnd3	.	nonsynonymous SNV	Rnd3:NM_028810:exon1:c.C118T:p.L40F	.	het	.	2	51148757	51148757	T	A	het	63.64	13
2	53118212	53118212	A	G	exonic	Fmnl2	.	nonsynonymous SNV	Fmnl2:NM_172409:exon19:c.C2423G:p.S808C	.	het	.	2	53118212	53118212	A	G	het	63.64	13
2	53118239	53118239	A	G	exonic	Fmnl2	.	nonsynonymous SNV	Fmnl2:NM_172409:exon19:c.T2450G:p.L817R	.	het	.	2	53118239	53118239	A	G	het	35.64	13
2	53152463	53152463	G	C	exonic	Prpf40a	.	nonsynonymous SNV	Prpf40a:NM_001371016:exon13:c.C1522G:p.L508V,Prpf40a:NM_001371019:exon13:c.C1396G:p.L466V,Prpf40a:NM_001371020:exon13:c.C1396G:p.L466V,Prpf40a:NM_001371015:exon14:c.C1576G:p.L526V,Prpf40a:NM_001371017:exon14:c.C1450G:p.L484V,Prpf40a:NM_001371018:exon14:c.C1450G:p.L484V,Prpf40a:NM_018785:exon14:c.C1576G:p.L526V	.	het	.	2	53152463	53152463	G	C	het	159.64	33
2	53152467	53152467	T	C	exonic	Prpf40a	.	nonsynonymous SNV	Prpf40a:NM_001371016:exon13:c.C1518G:p.F506L,Prpf40a:NM_001371019:exon13:c.C1392G:p.F464L,Prpf40a:NM_001371020:exon13:c.C1392G:p.F464L,Prpf40a:NM_001371015:exon14:c.C1572G:p.F524L,Prpf40a:NM_001371017:exon14:c.C1446G:p.F482L,Prpf40a:NM_001371018:exon14:c.C1446G:p.F482L,Prpf40a:NM_018785:exon14:c.C1572G:p.F524L	.	het	.	2	53152467	53152467	T	C	het	175.64	36
2	53152497	53152497	A	C	exonic	Prpf40a	.	nonsynonymous SNV	Prpf40a:NM_001371016:exon13:c.T1488G:p.D496E,Prpf40a:NM_001371019:exon13:c.T1362G:p.D454E,Prpf40a:NM_001371020:exon13:c.T1362G:p.D454E,Prpf40a:NM_001371015:exon14:c.T1542G:p.D514E,Prpf40a:NM_001371017:exon14:c.T1416G:p.D472E,Prpf40a:NM_001371018:exon14:c.T1416G:p.D472E,Prpf40a:NM_018785:exon14:c.T1542G:p.D514E	.	het	.	2	53152497	53152497	A	C	het	28.64	45
2	55594957	55594957	C	G	exonic	Kcnj3	.	nonsynonymous SNV	Kcnj3:NM_008426:exon4:c.T1066G:p.Y356D,Kcnj3:NM_001355118:exon5:c.T1066G:p.Y356D	.	het	.	2	55594957	55594957	C	G	het	28.64	10
2	60311746	60311746	G	A	exonic	Ly75	.	nonsynonymous SNV	Ly75:NM_013825:exon29:c.G4019T:p.G1340V	.	het	.	2	60311746	60311746	G	A	het	126.64	22
2	60311762	60311762	T	C	exonic	Ly75	.	nonsynonymous SNV	Ly75:NM_013825:exon29:c.A4003G:p.T1335A	.	het	.	2	60311762	60311762	T	C	het	228.64	26
2	60349872	60349872	C	T	exonic	Ly75	.	nonsynonymous SNV	Ly75:NM_013825:exon12:c.C1960A:p.L654I	.	het	.	2	60349872	60349872	C	T	het	517.64	23
2	62544371	62544371	C	T	exonic	Fap	.	nonsynonymous SNV	Fap:NM_007986:exon10:c.T782A:p.V261D	.	het	.	2	62544371	62544371	C	T	het	79.64	16
2	62544374	62544374	C	T	exonic	Fap	.	nonsynonymous SNV	Fap:NM_007986:exon10:c.C779A:p.P260Q	.	het	.	2	62544374	62544374	C	T	het	79.64	16
2	62739335	62739335	A	G	exonic	Kcnh7	.	nonsynonymous SNV	Kcnh7:NM_133207:exon10:c.T2216C:p.L739S	.	het	.	2	62739335	62739335	A	G	het	37.64	12
2	62787909	62787909	A	G	exonic	Kcnh7	.	nonsynonymous SNV	Kcnh7:NM_133207:exon7:c.G1235C:p.W412S	.	het	.	2	62787909	62787909	A	G	het	41.64	11
2	65098758	65098758	C	G	exonic	Cobll1	.	nonsynonymous SNV	Cobll1:NM_027225:exon11:c.A2223C:p.K741N,Cobll1:NM_177025:exon12:c.A2334C:p.K778N,Cobll1:NM_001363076:exon13:c.A2433C:p.K811N,Cobll1:NM_001363077:exon13:c.A2337C:p.K779N	.	het	.	2	65098758	65098758	C	G	het	310.64	14
2	65098760	65098760	T	C	exonic	Cobll1	.	nonsynonymous SNV	Cobll1:NM_027225:exon11:c.A2221G:p.K741E,Cobll1:NM_177025:exon12:c.A2332G:p.K778E,Cobll1:NM_001363076:exon13:c.A2431G:p.K811E,Cobll1:NM_001363077:exon13:c.A2335G:p.K779E	.	het	.	2	65098760	65098760	T	C	het	310.64	14
2	65482199	65482199	T	A	exonic	Scn3a	.	nonsynonymous SNV	Scn3a:NM_001355166:exon20:c.A3798T:p.Q1266H,Scn3a:NM_001355167:exon20:c.A3747T:p.Q1249H,Scn3a:NM_001355168:exon20:c.A3660T:p.Q1220H,Scn3a:NM_001355169:exon20:c.A3660T:p.Q1220H,Scn3a:NM_001355170:exon20:c.A3651T:p.Q1217H,Scn3a:NM_001355171:exon20:c.A1893T:p.Q631H,Scn3a:NM_018732:exon20:c.A3651T:p.Q1217H	.	het	.	2	65482199	65482199	T	A	het	77.64	17
2	65482201	65482201	C	T	exonic	Scn3a	.	nonsynonymous SNV	Scn3a:NM_001355166:exon20:c.C3796A:p.Q1266K,Scn3a:NM_001355167:exon20:c.C3745A:p.Q1249K,Scn3a:NM_001355168:exon20:c.C3658A:p.Q1220K,Scn3a:NM_001355169:exon20:c.C3658A:p.Q1220K,Scn3a:NM_001355170:exon20:c.C3649A:p.Q1217K,Scn3a:NM_001355171:exon20:c.C1891A:p.Q631K,Scn3a:NM_018732:exon20:c.C3649A:p.Q1217K	.	het	.	2	65482201	65482201	C	T	het	76.64	17
2	65717680	65717680	T	C	exonic	Scn2a	.	nonsynonymous SNV	Scn2a:NM_001099298:exon17:c.G3215C:p.G1072A,Scn2a:NM_001346679:exon17:c.G3215C:p.G1072A,Scn2a:NM_001346680:exon17:c.G3215C:p.G1072A	.	het	.	2	65717680	65717680	T	C	het	376.64	27
2	66285913	66285913	A	G	exonic	Scn1a	.	nonsynonymous SNV	Scn1a:NM_001313997:exon24:c.A4474C:p.K1492Q,Scn1a:NM_018733:exon24:c.A4441C:p.K1481Q	.	het	.	2	66285913	66285913	A	G	het	220.64	16
2	66285984	66285984	T	C	exonic	Scn1a	.	nonsynonymous SNV	Scn1a:NM_001313997:exon24:c.T4403G:p.I1468S,Scn1a:NM_018733:exon24:c.T4370G:p.I1457S	.	het	.	2	66285984	66285984	T	C	het	189.64	19
2	66318248	66318248	T	C	exonic	Scn1a	.	nonsynonymous SNV	Scn1a:NM_001313997:exon17:c.T2985G:p.F995L,Scn1a:NM_018733:exon17:c.T2952G:p.F984L	.	het	.	2	66318248	66318248	T	C	het	178.64	13
2	66318262	66318262	T	C	exonic	Scn1a	.	nonsynonymous SNV	Scn1a:NM_001313997:exon17:c.C2971G:p.L991V,Scn1a:NM_018733:exon17:c.C2938G:p.L980V	.	het	.	2	66318262	66318262	T	C	het	220.64	14
2	66318277	66318277	G	A	exonic	Scn1a	.	nonsynonymous SNV	Scn1a:NM_001313997:exon17:c.C2956T:p.L986F,Scn1a:NM_018733:exon17:c.C2923T:p.L975F	.	het	.	2	66318277	66318277	G	A	het	217.64	15
2	66327686	66327686	T	C	exonic	Scn1a	.	nonsynonymous SNV	Scn1a:NM_001313997:exon10:c.T1342G:p.L448V,Scn1a:NM_018733:exon10:c.T1342G:p.L448V	.	het	.	2	66327686	66327686	T	C	het	91.64	12
2	66484262	66484262	0	C	exonic	Scn9a	.	nonsynonymous SNV	Scn9a:NM_001290674:exon27:c.C5111G:p.P1704R,Scn9a:NM_001290675:exon27:c.C5078G:p.P1693R	.	het	.	2	66484262	66484262	-	C	het	40.60	14
2	66550398	66550398	G	C	exonic	Scn9a	.	nonsynonymous SNV	Scn9a:NM_001290674:exon8:c.T907G:p.F303V,Scn9a:NM_001290675:exon8:c.T907G:p.F303V	.	het	.	2	66550398	66550398	G	C	het	44.64	13
2	69185527	69185527	T	C	exonic	Nostrin	.	nonsynonymous SNV	Nostrin:NM_181547:exon15:c.G1363C:p.D455H	.	het	.	2	69185527	69185527	T	C	het	223.64	28
2	69461332	69461332	G	C	exonic	Lrp2	.	nonsynonymous SNV	Lrp2:NM_001081088:exon54:c.C10502G:p.T3501S	.	het	.	2	69461332	69461332	G	C	het	52.64	10
2	69461333	69461333	A	G	exonic	Lrp2	.	nonsynonymous SNV	Lrp2:NM_001081088:exon54:c.A10501C:p.T3501P	.	het	.	2	69461333	69461333	A	G	het	52.64	10
2	69489309	69489309	A	T	exonic	Lrp2	.	nonsynonymous SNV	Lrp2:NM_001081088:exon36:c.C5869A:p.L1957M	.	het	.	2	69489309	69489309	A	T	het	76.64	10
2	69507857	69507857	T	C	exonic	Lrp2	.	nonsynonymous SNV	Lrp2:NM_001081088:exon24:c.T3578G:p.F1193C	.	het	.	2	69507857	69507857	T	C	het	122.64	11
2	69548940	69548940	C	T	exonic	Lrp2	.	nonsynonymous SNV	Lrp2:NM_001081088:exon4:c.T427A:p.Y143N	.	het	.	2	69548940	69548940	C	T	het	205.64	34
2	69732841	69732841	C	T	exonic	Ppig	.	nonsynonymous SNV	Ppig:NM_001081086:exon5:c.A160T:p.T54S	.	het	.	2	69732841	69732841	C	T	het	23.64	14
2	70020543	70020543	T	C	exonic	Ubr3	.	nonsynonymous SNV	Ubr3:NM_001303033:exon37:c.A5307C:p.K1769N,Ubr3:NM_177783:exon37:c.A5295C:p.K1765N	.	het	.	2	70020543	70020543	T	C	het	36.64	10
2	71247149	71247149	0	G	exonic	Dync1i2	.	nonsynonymous SNV	Dync1i2:NM_001198876:exon7:c.T666G:p.S222R,Dync1i2:NM_010064:exon7:c.T666G:p.S222R,Dync1i2:NM_001198874:exon8:c.T726G:p.S242R,Dync1i2:NM_001198875:exon8:c.T684G:p.S228R,Dync1i2:NM_001347173:exon9:c.T744G:p.S248R,Dync1i2:NM_001198872:exon10:c.T795G:p.S265R,Dync1i2:NM_001198873:exon10:c.T780G:p.S260R,Dync1i2:NM_001198877:exon10:c.T795G:p.S265R,Dync1i2:NM_001198878:exon10:c.T780G:p.S260R	.	het	.	2	71247149	71247149	-	G	het	43.60	13
2	71247155	71247155	G	T	exonic	Dync1i2	.	nonsynonymous SNV	Dync1i2:NM_001198876:exon7:c.A672T:p.R224S,Dync1i2:NM_010064:exon7:c.A672T:p.R224S,Dync1i2:NM_001198874:exon8:c.A732T:p.R244S,Dync1i2:NM_001198875:exon8:c.A690T:p.R230S,Dync1i2:NM_001347173:exon9:c.A750T:p.R250S,Dync1i2:NM_001198872:exon10:c.A801T:p.R267S,Dync1i2:NM_001198873:exon10:c.A786T:p.R262S,Dync1i2:NM_001198877:exon10:c.A801T:p.R267S,Dync1i2:NM_001198878:exon10:c.A786T:p.R262S	.	het	.	2	71247155	71247155	G	T	het	43.64	13
2	71247157	71247157	C	T	exonic	Dync1i2	.	nonsynonymous SNV	Dync1i2:NM_001198876:exon7:c.A674T:p.D225V,Dync1i2:NM_010064:exon7:c.A674T:p.D225V,Dync1i2:NM_001198874:exon8:c.A734T:p.D245V,Dync1i2:NM_001198875:exon8:c.A692T:p.D231V,Dync1i2:NM_001347173:exon9:c.A752T:p.D251V,Dync1i2:NM_001198872:exon10:c.A803T:p.D268V,Dync1i2:NM_001198873:exon10:c.A788T:p.D263V,Dync1i2:NM_001198877:exon10:c.A803T:p.D268V,Dync1i2:NM_001198878:exon10:c.A788T:p.D263V	.	het	.	2	71247157	71247157	C	T	het	43.64	13
2	73382034	73382034	C	T	exonic	Gpr155	.	nonsynonymous SNV	Gpr155:NM_001190297:exon3:c.G244A:p.A82T,Gpr155:NM_001276443:exon3:c.G244A:p.A82T,Gpr155:NM_001276444:exon3:c.G244A:p.A82T	.	het	.	2	73382034	73382034	C	T	het	154.64	18
2	75677684	75677684	A	T	exonic	Nfe2l2	.	nonsynonymous SNV	Nfe2l2:NM_010902:exon4:c.C431A:p.A144D	.	het	.	2	75677684	75677684	A	T	het	126.64	14
2	75677699	75677699	T	C	exonic	Nfe2l2	.	nonsynonymous SNV	Nfe2l2:NM_010902:exon4:c.A416G:p.D139G	.	het	.	2	75677699	75677699	T	C	het	49.64	11
2	75677705	75677705	C	T	exonic	Nfe2l2	.	nonsynonymous SNV	Nfe2l2:NM_010902:exon4:c.C410A:p.A137D	.	het	.	2	75677705	75677705	C	T	het	49.64	11
2	76136389	76136389	C	T	exonic	Pde11a	.	nonsynonymous SNV	Pde11a:NM_001081033:exon9:c.C1715A:p.A572D	.	het	.	2	76136389	76136389	C	T	het	212.64	20
2	76338249	76338249	C	A	exonic	Pde11a	.	nonsynonymous SNV	Pde11a:NM_001081033:exon1:c.A359T:p.E120V	.	het	.	2	76338249	76338249	C	A	het	94.64	10
2	76740661	76740661	G	A	exonic	Ttn	.	nonsynonymous SNV	Ttn:NM_028004:exon154:c.A54906T:p.E18302D,Ttn:NM_011652:exon275:c.A74649T:p.E24883D,Ttn:NM_001385708:exon312:c.A80481T:p.E26827D	.	het	.	2	76740661	76740661	G	A	het	120.64	20
2	76742270	76742270	A	G	exonic	Ttn	.	nonsynonymous SNV	Ttn:NM_028004:exon154:c.T53297C:p.I17766T,Ttn:NM_011652:exon275:c.T73040C:p.I24347T,Ttn:NM_001385708:exon312:c.T78872C:p.I26291T	.	het	.	2	76742270	76742270	A	G	het	143.64	11
2	76927261	76927261	C	T	exonic	Ttn	.	nonsynonymous SNV	Ttn:NM_028004:exon43:c.T10009A:p.W3337R,Ttn:NM_001385708:exon44:c.T10147A:p.W3383R,Ttn:NM_011652:exon44:c.T10147A:p.W3383R	.	het	.	2	76927261	76927261	C	T	het	33.64	10
2	79303329	79303329	T	G	exonic	Itga4	.	nonsynonymous SNV	Itga4:NM_010576:exon17:c.T1892G:p.L631R	.	het	.	2	79303329	79303329	T	G	het	166.64	28
2	80321249	80321249	C	A	exonic	Dnajc10	.	nonsynonymous SNV	Dnajc10:NM_024181:exon4:c.T373A:p.Y125N	.	het	.	2	80321249	80321249	C	A	het	79.64	16
2	82975734	82975734	T	C	exonic	Fsip2	.	nonsynonymous SNV	Fsip2:NM_001370266:exon16:c.A2390C:p.K797T	.	het	.	2	82975734	82975734	T	C	het	39.64	21
2	82976012	82976012	A	G	exonic	Fsip2	.	nonsynonymous SNV	Fsip2:NM_001370266:exon16:c.C2668G:p.Q890E	.	het	.	2	82976012	82976012	A	G	het	142.64	25
2	82976205	82976205	T	C	exonic	Fsip2	.	nonsynonymous SNV	Fsip2:NM_001370266:exon16:c.T2861C:p.V954A	.	het	.	2	82976205	82976205	T	C	het	126.64	30
2	83858239	83858239	A	C	exonic	Fam171b	.	nonsynonymous SNV	Fam171b:NM_175514:exon4:c.T578C:p.V193A	.	het	.	2	83858239	83858239	A	C	het	49.64	11
2	83858241	83858241	A	G	exonic	Fam171b	.	nonsynonymous SNV	Fam171b:NM_175514:exon4:c.C580G:p.Q194E	.	het	.	2	83858241	83858241	A	G	het	49.64	11
2	83860417	83860417	A	G	exonic	Fam171b	.	nonsynonymous SNV	Fam171b:NM_175514:exon5:c.T723G:p.N241K	.	het	.	2	83860417	83860417	A	G	het	46.64	12
2	83860425	83860425	A	G	exonic	Fam171b	.	nonsynonymous SNV	Fam171b:NM_175514:exon5:c.T731G:p.L244W	.	het	.	2	83860425	83860425	A	G	het	49.64	11
2	84612081	84612081	0	A	exonic	Ctnnd1	.	nonsynonymous SNV	Ctnnd1:NM_001085449:exon9:c.A1585T:p.T529S,Ctnnd1:NM_001355067:exon9:c.A1585T:p.T529S,Ctnnd1:NM_001085453:exon10:c.A1888T:p.T630S,Ctnnd1:NM_001355066:exon10:c.A1888T:p.T630S,Ctnnd1:NM_001085448:exon11:c.A1906T:p.T636S,Ctnnd1:NM_001085450:exon11:c.A1906T:p.T636S,Ctnnd1:NM_001355064:exon11:c.A1906T:p.T636S,Ctnnd1:NM_001355065:exon12:c.A1906T:p.T636S,Ctnnd1:NM_007615:exon12:c.A1906T:p.T636S	.	het	.	2	84612081	84612081	-	A	het	58.60	23
2	84946887	84946887	A	T	exonic	Slc43a3	.	nonsynonymous SNV	Slc43a3:NM_021398:exon7:c.G579T:p.M193I	.	het	.	2	84946887	84946887	A	T	het	49.64	11
2	85196028	85196028	C	A	exonic	Lrrc55	.	nonsynonymous SNV	Lrrc55:NM_001033346:exon2:c.G612T:p.M204I	.	het	.	2	85196028	85196028	C	A	het	72.64	30
2	85430029	85430029	A	T	exonic	Olfr994	.	nonsynonymous SNV	Olfr994:NM_146433:exon1:c.G799A:p.E267K	.	het	.	2	85430029	85430029	A	T	het	119.64	11
2	86130799	86130799	C	T	exonic	Olfr1039	.	nonsynonymous SNV	Olfr1039:NM_001011784:exon1:c.T863A:p.L288Q	.	het	.	2	86130799	86130799	C	T	het	73.64	18
2	86130800	86130800	C	T	exonic	Olfr1039	.	nonsynonymous SNV	Olfr1039:NM_001011784:exon1:c.C862A:p.L288M	.	het	.	2	86130800	86130800	C	T	het	73.64	18
2	86236130	86236130	C	T	exonic	Olfr1048	.	nonsynonymous SNV	Olfr1048:NM_147014:exon1:c.T704A:p.M235K	.	het	.	2	86236130	86236130	C	T	het	43.64	13
2	86236133	86236133	T	A	exonic	Olfr1048	.	nonsynonymous SNV	Olfr1048:NM_147014:exon1:c.G701T:p.R234I	.	het	.	2	86236133	86236133	T	A	het	43.64	13
2	86236139	86236139	G	T	exonic	Olfr1048	.	nonsynonymous SNV	Olfr1048:NM_147014:exon1:c.T695A:p.I232K	.	het	.	2	86236139	86236139	G	T	het	43.64	13
2	86236157	86236157	A	G	exonic	Olfr1048	.	nonsynonymous SNV	Olfr1048:NM_147014:exon1:c.T677C:p.L226P	.	het	.	2	86236157	86236157	A	G	het	122.64	14
2	86236475	86236475	T	C	exonic	Olfr1048	.	nonsynonymous SNV	Olfr1048:NM_147014:exon1:c.T359G:p.F120C	.	het	.	2	86236475	86236475	T	C	het	141.64	16
2	86236524	86236524	A	T	exonic	Olfr1048	.	nonsynonymous SNV	Olfr1048:NM_147014:exon1:c.T310A:p.C104S	.	het	.	2	86236524	86236524	A	T	het	73.64	18
2	86236543	86236543	C	T	exonic	Olfr1048	.	nonsynonymous SNV	Olfr1048:NM_147014:exon1:c.T291A:p.N97K	.	het	.	2	86236543	86236543	C	T	het	160.64	19
2	86236545	86236545	T	A	exonic	Olfr1048	.	nonsynonymous SNV	Olfr1048:NM_147014:exon1:c.A289T:p.N97Y	.	het	.	2	86236545	86236545	T	A	het	160.64	19
2	86236556	86236556	A	G	exonic	Olfr1048	.	nonsynonymous SNV	Olfr1048:NM_147014:exon1:c.T278C:p.V93A	.	het	.	2	86236556	86236556	A	G	het	157.64	20
2	86236558	86236558	A	T	exonic	Olfr1048	.	nonsynonymous SNV	Olfr1048:NM_147014:exon1:c.T276A:p.F92L	.	het	.	2	86236558	86236558	A	T	het	157.64	20
2	86236596	86236596	A	G	exonic	Olfr1048	.	nonsynonymous SNV	Olfr1048:NM_147014:exon1:c.A238C:p.N80H	.	het	.	2	86236596	86236596	A	G	het	299.64	24
2	86236806	86236806	T	C	exonic	Olfr1048	.	nonsynonymous SNV	Olfr1048:NM_147014:exon1:c.C28G:p.H10D	.	het	.	2	86236806	86236806	T	C	het	235.64	14
2	86297910	86297910	G	A	exonic	Olfr1052	.	nonsynonymous SNV	Olfr1052:NM_147010:exon1:c.T93A:p.F31L	.	het	.	2	86297910	86297910	G	A	het	32.64	13
2	86297980	86297980	A	G	exonic	Olfr1052	.	nonsynonymous SNV	Olfr1052:NM_147010:exon1:c.C163G:p.L55V	.	het	.	2	86297980	86297980	A	G	het	48.64	17
2	86297994	86297994	C	T	exonic	Olfr1052	.	nonsynonymous SNV	Olfr1052:NM_147010:exon1:c.G177T:p.M59I	.	het	.	2	86297994	86297994	C	T	het	35.64	16
2	86298052	86298052	C	A	exonic	Olfr1052	.	nonsynonymous SNV	Olfr1052:NM_147010:exon1:c.C235A:p.P79T	.	het	.	2	86298052	86298052	C	A	het	36.64	16
2	86298088	86298088	A	C	exonic	Olfr1052	.	nonsynonymous SNV	Olfr1052:NM_147010:exon1:c.A271C:p.T91P	.	het	.	2	86298088	86298088	A	C	het	97.64	18
2	86298280	86298280	G	C	exonic	Olfr1052	.	nonsynonymous SNV	Olfr1052:NM_147010:exon1:c.A463C:p.N155H	.	het	.	2	86298280	86298280	G	C	het	85.64	14
2	86298282	86298282	C	G	exonic	Olfr1052	.	nonsynonymous SNV	Olfr1052:NM_147010:exon1:c.C465G:p.N155K	.	het	.	2	86298282	86298282	C	G	het	85.64	14
2	86298443	86298443	T	A	exonic	Olfr1052	.	nonsynonymous SNV	Olfr1052:NM_147010:exon1:c.G626A:p.G209D	.	het	.	2	86298443	86298443	T	A	het	71.64	13
2	86315191	86315191	A	G	exonic	Olfr1053	.	nonsynonymous SNV	Olfr1053:NM_001177857:exon1:c.T94C:p.F32L	.	het	.	2	86315191	86315191	A	G	het	156.64	30
2	86422839	86422839	G	T	exonic	Olfr1062	.	nonsynonymous SNV	Olfr1062:NM_147078:exon1:c.C836A:p.T279N	.	het	.	2	86422839	86422839	G	T	het	30.64	13
2	86422947	86422947	C	T	exonic	Olfr1062	.	nonsynonymous SNV	Olfr1062:NM_147078:exon1:c.C728A:p.S243Y	.	het	.	2	86422947	86422947	C	T	het	104.64	17
2	86423047	86423047	T	C	exonic	Olfr1062	.	nonsynonymous SNV	Olfr1062:NM_147078:exon1:c.T628G:p.S210A	.	het	.	2	86423047	86423047	T	C	het	97.64	22
2	86423062	86423062	A	G	exonic	Olfr1062	.	nonsynonymous SNV	Olfr1062:NM_147078:exon1:c.A613C:p.T205P	.	het	.	2	86423062	86423062	A	G	het	25.64	19
2	86423083	86423083	C	T	exonic	Olfr1062	.	nonsynonymous SNV	Olfr1062:NM_147078:exon1:c.G592A:p.V198I	.	het	.	2	86423083	86423083	C	T	het	25.64	19
2	86553740	86553740	G	C	exonic	Olfr1080	.	nonsynonymous SNV	Olfr1080:NM_146409:exon2:c.A383G:p.K128R	.	het	.	2	86553740	86553740	G	C	het	67.64	13
2	86553797	86553797	C	G	exonic	Olfr1080	.	nonsynonymous SNV	Olfr1080:NM_146409:exon2:c.G326C:p.G109A	.	het	.	2	86553797	86553797	C	G	het	78.64	15
2	86553836	86553836	A	G	exonic	Olfr1080	.	nonsynonymous SNV	Olfr1080:NM_146409:exon2:c.T287C:p.L96P	.	het	.	2	86553836	86553836	A	G	het	60.64	18
2	86594032	86594032	T	C	exonic	Olfr1082	.	nonsynonymous SNV	Olfr1082:NM_207674:exon2:c.C795G:p.S265R	.	het	.	2	86594032	86594032	T	C	het	127.64	15
2	86594070	86594070	G	A	exonic	Olfr1082	.	nonsynonymous SNV	Olfr1082:NM_207674:exon2:c.G757T:p.G253W	.	het	.	2	86594070	86594070	G	A	het	31.64	14
2	86594349	86594349	G	A	exonic	Olfr1082	.	nonsynonymous SNV	Olfr1082:NM_207674:exon2:c.A478T:p.T160S	.	het	.	2	86594349	86594349	G	A	het	211.64	17
2	86594736	86594736	C	G	exonic	Olfr1082	.	nonsynonymous SNV	Olfr1082:NM_207674:exon2:c.T91C:p.F31L	.	het	.	2	86594736	86594736	C	G	het	91.64	16
2	86690130	86690130	C	A	exonic	Olfr1087	.	nonsynonymous SNV	Olfr1087:NM_146846:exon1:c.A844T:p.I282L	.	het	.	2	86690130	86690130	C	A	het	91.64	14
2	86690259	86690259	T	G	exonic	Olfr1087	.	nonsynonymous SNV	Olfr1087:NM_146846:exon1:c.T715C:p.S239P	.	het	.	2	86690259	86690259	T	G	het	190.64	39
2	86690468	86690468	A	G	exonic	Olfr1087	.	nonsynonymous SNV	Olfr1087:NM_146846:exon1:c.G506C:p.C169S	.	het	.	2	86690468	86690468	A	G	het	138.64	22
2	86690694	86690694	G	C	exonic	Olfr1087	.	nonsynonymous SNV	Olfr1087:NM_146846:exon1:c.T280G:p.Y94D	.	het	.	2	86690694	86690694	G	C	het	93.64	18
2	86690779	86690779	T	C	exonic	Olfr1087	.	nonsynonymous SNV	Olfr1087:NM_146846:exon1:c.C195G:p.H65Q	.	het	.	2	86690779	86690779	T	C	het	39.64	21
2	86690855	86690855	A	T	exonic	Olfr1087	.	nonsynonymous SNV	Olfr1087:NM_146846:exon1:c.T119A:p.F40Y	.	het	.	2	86690855	86690855	A	T	het	220.64	24
2	86690871	86690871	T	G	exonic	Olfr1087	.	nonsynonymous SNV	Olfr1087:NM_146846:exon1:c.T103C:p.Y35H	.	het	.	2	86690871	86690871	T	G	het	354.64	24
2	86690942	86690942	T	C	exonic	Olfr1087	.	nonsynonymous SNV	Olfr1087:NM_146846:exon1:c.A32G:p.Q11R	.	het	.	2	86690942	86690942	T	C	het	245.64	23
2	86958606	86958606	A	G	exonic	Olfr1099	.	nonsynonymous SNV	Olfr1099:NM_146768:exon1:c.T851C:p.M284T	.	het	.	2	86958606	86958606	A	G	het	69.64	15
2	86958691	86958691	G	A	exonic	Olfr1099	.	nonsynonymous SNV	Olfr1099:NM_146768:exon1:c.A766T:p.I256F	.	het	.	2	86958691	86958691	G	A	het	46.64	24
2	86958692	86958692	C	A	exonic	Olfr1099	.	nonsynonymous SNV	Olfr1099:NM_146768:exon1:c.G765T:p.M255I	.	het	.	2	86958692	86958692	C	A	het	46.64	24
2	86958773	86958773	T	C	exonic	Olfr1099	.	nonsynonymous SNV	Olfr1099:NM_146768:exon1:c.C684G:p.I228M	.	het	.	2	86958773	86958773	T	C	het	108.64	20
2	86958946	86958946	A	G	exonic	Olfr1099	.	nonsynonymous SNV	Olfr1099:NM_146768:exon1:c.T511C:p.S171P	.	het	.	2	86958946	86958946	A	G	het	40.64	14
2	86958947	86958947	A	T	exonic	Olfr1099	.	nonsynonymous SNV	Olfr1099:NM_146768:exon1:c.C510A:p.N170K	.	het	.	2	86958947	86958947	A	T	het	40.64	14
2	86959015	86959015	T	C	exonic	Olfr1099	.	nonsynonymous SNV	Olfr1099:NM_146768:exon1:c.T442G:p.S148A	.	het	.	2	86959015	86959015	T	C	het	105.64	18
2	86959134	86959134	G	C	exonic	Olfr1099	.	nonsynonymous SNV	Olfr1099:NM_146768:exon1:c.C323G:p.A108G	.	het	.	2	86959134	86959134	G	C	het	304.64	24
2	86959158	86959158	T	C	exonic	Olfr1099	.	nonsynonymous SNV	Olfr1099:NM_146768:exon1:c.A299G:p.Q100R	.	het	.	2	86959158	86959158	T	C	het	212.64	21
2	86977962	86977962	G	A	exonic	Olfr1100	.	nonsynonymous SNV	Olfr1100:NM_146594:exon1:c.A833T:p.Y278F	.	het	.	2	86977962	86977962	G	A	het	37.64	15
2	86978058	86978058	A	G	exonic	Olfr1100	.	nonsynonymous SNV	Olfr1100:NM_146594:exon1:c.T737C:p.L246P	.	het	.	2	86978058	86978058	A	G	het	181.64	19
2	86978175	86978175	A	G	exonic	Olfr1100	.	nonsynonymous SNV	Olfr1100:NM_146594:exon1:c.T620C:p.L207P	.	het	.	2	86978175	86978175	A	G	het	255.64	24
2	86978598	86978598	G	C	exonic	Olfr1100	.	nonsynonymous SNV	Olfr1100:NM_146594:exon1:c.T197G:p.L66W	.	het	.	2	86978598	86978598	G	C	het	52.64	40
2	86978600	86978600	0	T	exonic	Olfr1100	.	nonsynonymous SNV	Olfr1100:NM_146594:exon1:c.T195A:p.H65Q	.	het	.	2	86978600	86978600	-	T	het	52.60	40
2	86978748	86978748	C	T	exonic	Olfr1100	.	nonsynonymous SNV	Olfr1100:NM_146594:exon1:c.G47A:p.G16E	.	het	.	2	86978748	86978748	C	T	het	256.64	33
2	86978758	86978758	A	G	exonic	Olfr1100	.	nonsynonymous SNV	Olfr1100:NM_146594:exon1:c.A37C:p.I13L	.	het	.	2	86978758	86978758	A	G	het	28.64	33
2	86978768	86978768	A	G	exonic	Olfr1100	.	nonsynonymous SNV	Olfr1100:NM_146594:exon1:c.G27C:p.E9D	.	het	.	2	86978768	86978768	A	G	het	25.64	34
2	86978775	86978775	T	A	exonic	Olfr1100	.	nonsynonymous SNV	Olfr1100:NM_146594:exon1:c.C20T:p.T7I	.	het	.	2	86978775	86978775	T	A	het	28.64	33
2	87092510	87092510	T	G	exonic	Olfr1109	.	nonsynonymous SNV	Olfr1109:NM_146766:exon1:c.G886C:p.D296H	.	het	.	2	87092510	87092510	T	G	het	141.64	19
2	87093013	87093013	T	C	exonic	Olfr1109	.	nonsynonymous SNV	Olfr1109:NM_146766:exon1:c.A383G:p.N128S	.	het	.	2	87093013	87093013	T	C	het	94.64	15
2	87107505	87107505	A	G	exonic	Olfr259	.	nonsynonymous SNV	Olfr259:NM_146770:exon1:c.A881C:p.N294T	.	het	.	2	87107505	87107505	A	G	het	76.64	17
2	87107508	87107508	A	T	exonic	Olfr259	.	nonsynonymous SNV	Olfr259:NM_146770:exon1:c.G878A:p.R293K	.	het	.	2	87107508	87107508	A	T	het	76.64	17
2	87107679	87107679	T	C	exonic	Olfr259	.	nonsynonymous SNV	Olfr259:NM_146770:exon1:c.A707G:p.K236R	.	het	.	2	87107679	87107679	T	C	het	92.64	21
2	87135890	87135890	G	C	exonic	Olfr1110	.	nonsynonymous SNV	Olfr1110:NM_146769:exon2:c.A430G:p.M144V	.	het	.	2	87135890	87135890	G	C	het	70.64	19
2	87135893	87135893	T	C	exonic	Olfr1110	.	nonsynonymous SNV	Olfr1110:NM_146769:exon2:c.C427G:p.Q143E	.	het	.	2	87135893	87135893	T	C	het	70.64	19
2	87135905	87135905	A	C	exonic	Olfr1110	.	nonsynonymous SNV	Olfr1110:NM_146769:exon2:c.A415G:p.N139D	.	het	.	2	87135905	87135905	A	C	het	25.64	19
2	87135923	87135923	A	G	exonic	Olfr1110	.	nonsynonymous SNV	Olfr1110:NM_146769:exon2:c.A397C:p.T133P	.	het	.	2	87135923	87135923	A	G	het	634.64	26
2	87135969	87135969	A	G	exonic	Olfr1110	.	nonsynonymous SNV	Olfr1110:NM_146769:exon2:c.G351C:p.M117I	.	het	.	2	87135969	87135969	A	G	het	34.64	16
2	87136018	87136018	T	A	exonic	Olfr1110	.	nonsynonymous SNV	Olfr1110:NM_146769:exon2:c.G302T:p.S101I	.	het	.	2	87136018	87136018	T	A	het	46.64	12
2	87149780	87149780	T	C	exonic	Olfr1111	.	nonsynonymous SNV	Olfr1111:NM_146593:exon1:c.A880G:p.N294D	.	het	.	2	87149780	87149780	T	C	het	21.64	16
2	87149810	87149810	A	G	exonic	Olfr1111	.	nonsynonymous SNV	Olfr1111:NM_146593:exon1:c.A850C:p.M284L	.	het	.	2	87149810	87149810	A	G	het	22.64	20
2	87149971	87149971	C	A	exonic	Olfr1111	.	nonsynonymous SNV	Olfr1111:NM_146593:exon1:c.C689T:p.S230F	.	het	.	2	87149971	87149971	C	A	het	25.64	19
2	87150000	87150000	T	C	exonic	Olfr1111	.	nonsynonymous SNV	Olfr1111:NM_146593:exon1:c.C660G:p.C220W	.	het	.	2	87150000	87150000	T	C	het	70.64	19
2	87150031	87150031	C	T	exonic	Olfr1111	.	nonsynonymous SNV	Olfr1111:NM_146593:exon1:c.C629A:p.T210N	.	het	.	2	87150031	87150031	C	T	het	70.64	23
2	87150402	87150402	G	A	exonic	Olfr1111	.	nonsynonymous SNV	Olfr1111:NM_146593:exon1:c.A258T:p.L86F	.	het	.	2	87150402	87150402	G	A	het	63.64	16
2	87150608	87150608	A	C	exonic	Olfr1111	.	nonsynonymous SNV	Olfr1111:NM_146593:exon1:c.A52G:p.T18A	.	het	.	2	87150608	87150608	A	C	het	37.64	15
2	87150615	87150615	A	C	exonic	Olfr1111	.	nonsynonymous SNV	Olfr1111:NM_146593:exon1:c.C45G:p.I15M	.	het	.	2	87150615	87150615	A	C	het	37.64	15
2	87371696	87371696	C	G	exonic	Olfr1121	.	nonsynonymous SNV	Olfr1121:NM_146348:exon1:c.A163G:p.T55A	.	het	.	2	87371696	87371696	C	G	het	34.64	16
2	87418269	87418269	G	A	exonic	Olfr1123	.	nonsynonymous SNV	Olfr1123:NM_146350:exon1:c.T220A:p.F74I	.	het	.	2	87418269	87418269	G	A	het	43.64	28
2	87418276	87418276	C	G	exonic	Olfr1123	.	nonsynonymous SNV	Olfr1123:NM_146350:exon1:c.T227G:p.L76R	.	het	.	2	87418276	87418276	C	G	het	28.64	33
2	87418533	87418533	A	C	exonic	Olfr1123	.	nonsynonymous SNV	Olfr1123:NM_146350:exon1:c.T484C:p.W162R	.	het	.	2	87418533	87418533	A	C	het	37.64	15
2	87418542	87418542	A	T	exonic	Olfr1123	.	nonsynonymous SNV	Olfr1123:NM_146350:exon1:c.G493T:p.V165F	.	het	.	2	87418542	87418542	A	T	het	31.64	17
2	87490873	87490873	C	A	exonic	Pramel7	.	nonsynonymous SNV	Pramel7:NM_178250:exon2:c.A817T:p.T273S	.	het	.	2	87490873	87490873	C	A	het	33.64	28
2	87490966	87490966	T	C	exonic	Pramel7	.	nonsynonymous SNV	Pramel7:NM_178250:exon2:c.A724G:p.T242A	.	het	.	2	87490966	87490966	T	C	het	303.64	25
2	87491205	87491205	T	C	exonic	Pramel7	.	nonsynonymous SNV	Pramel7:NM_178250:exon2:c.A485G:p.K162R	.	het	.	2	87491205	87491205	T	C	het	314.64	28
2	87491293	87491293	T	C	exonic	Pramel7	.	nonsynonymous SNV	Pramel7:NM_178250:exon2:c.C397G:p.Q133E	.	het	.	2	87491293	87491293	T	C	het	98.64	26
2	87711585	87711585	A	C	exonic	Olfr1137	.	nonsynonymous SNV	Olfr1137:NM_001011833:exon1:c.T320G:p.F107C	.	het	.	2	87711585	87711585	A	C	het	100.64	13
2	87810239	87810239	T	C	exonic	Olfr1145	.	nonsynonymous SNV	Olfr1145:NM_146320:exon1:c.T418C:p.Y140H	.	het	.	2	87810239	87810239	T	C	het	144.64	20
2	87973960	87973960	T	A	exonic	Olfr74	.	nonsynonymous SNV	Olfr74:NM_054091:exon1:c.G704T:p.R235L	.	het	.	2	87973960	87973960	T	A	het	226.64	12
2	87973961	87973961	T	A	exonic	Olfr74	.	nonsynonymous SNV	Olfr74:NM_054091:exon1:c.C703T:p.R235C	.	het	.	2	87973961	87973961	T	A	het	223.64	13
2	87973964	87973964	G	A	exonic	Olfr74	.	nonsynonymous SNV	Olfr74:NM_054091:exon1:c.G700T:p.G234W	.	het	.	2	87973964	87973964	G	A	het	223.64	13
2	88050375	88050375	T	G	exonic	Olfr1162	.	nonsynonymous SNV	Olfr1162:NM_001011835:exon1:c.T248C:p.L83P	.	het	.	2	88050375	88050375	T	G	het	130.64	29
2	88050462	88050462	C	A	exonic	Olfr1162	.	nonsynonymous SNV	Olfr1162:NM_001011835:exon1:c.A161T:p.N54I	.	het	.	2	88050462	88050462	C	A	het	79.64	20
2	88700840	88700840	A	G	exonic	Olfr1196	.	nonsynonymous SNV	Olfr1196:NM_146464:exon1:c.G488C:p.S163T	.	het	.	2	88700840	88700840	A	G	het	65.64	12
2	88701012	88701012	T	G	exonic	Olfr1196	.	nonsynonymous SNV	Olfr1196:NM_146464:exon1:c.G316C:p.A106P	.	het	.	2	88701012	88701012	T	G	het	31.64	17
2	88794567	88794567	G	A	exonic	Olfr1201	.	nonsynonymous SNV	Olfr1201:NM_146895:exon1:c.T184A:p.F62I	.	het	.	2	88794567	88794567	G	A	het	85.64	25
2	88794717	88794717	A	T	exonic	Olfr1201	.	nonsynonymous SNV	Olfr1201:NM_146895:exon1:c.A334T:p.I112F	.	het	.	2	88794717	88794717	A	T	het	52.64	10
2	88794804	88794804	A	C	exonic	Olfr1201	.	nonsynonymous SNV	Olfr1201:NM_146895:exon1:c.A421C:p.I141L	.	het	.	2	88794804	88794804	A	C	het	34.64	13
2	88794986	88794986	A	G	exonic	Olfr1201	.	nonsynonymous SNV	Olfr1201:NM_146895:exon1:c.T603G:p.S201R	.	het	.	2	88794986	88794986	A	G	het	22.64	11
2	88897115	88897115	T	G	exonic	Olfr1208	.	nonsynonymous SNV	Olfr1208:NM_146778:exon1:c.A481C:p.I161L	.	het	.	2	88897115	88897115	T	G	het	37.64	23
2	88897225	88897225	C	T	exonic	Olfr1208	.	nonsynonymous SNV	Olfr1208:NM_146778:exon1:c.G371A:p.C124Y	.	het	.	2	88897225	88897225	C	T	het	40.64	14
2	88897226	88897226	T	C	exonic	Olfr1208	.	nonsynonymous SNV	Olfr1208:NM_146778:exon1:c.T370G:p.C124G	.	het	.	2	88897226	88897226	T	C	het	130.64	14
2	89013212	89013212	G	T	exonic	Olfr1216	.	nonsynonymous SNV	Olfr1216:NM_146893:exon1:c.T851A:p.M284K	.	het	.	2	89013212	89013212	G	T	het	62.64	34
2	89013276	89013276	G	T	exonic	Olfr1216	.	nonsynonymous SNV	Olfr1216:NM_146893:exon1:c.G787A:p.A263T	.	het	.	2	89013276	89013276	G	T	het	124.64	24
2	89013462	89013462	T	G	exonic	Olfr1216	.	nonsynonymous SNV	Olfr1216:NM_146893:exon1:c.A601C:p.N201H	.	het	.	2	89013462	89013462	T	G	het	269.64	29
2	89013468	89013468	G	C	exonic	Olfr1216	.	nonsynonymous SNV	Olfr1216:NM_146893:exon1:c.T595G:p.F199V	.	het	.	2	89013468	89013468	G	C	het	27.64	29
2	89013497	89013497	T	A	exonic	Olfr1216	.	nonsynonymous SNV	Olfr1216:NM_146893:exon1:c.C566T:p.T189M	.	het	.	2	89013497	89013497	T	A	het	196.64	23
2	89013950	89013950	A	G	exonic	Olfr1216	.	nonsynonymous SNV	Olfr1216:NM_146893:exon1:c.G113C:p.G38A	.	het	.	2	89013950	89013950	A	G	het	150.64	15
2	89296441	89296441	G	T	exonic	Olfr1230	.	nonsynonymous SNV	Olfr1230:NM_146789:exon1:c.T828A:p.F276L	.	het	.	2	89296441	89296441	G	T	het	76.64	17
2	89296772	89296772	A	G	exonic	Olfr1230	.	nonsynonymous SNV	Olfr1230:NM_146789:exon1:c.T497C:p.F166S	.	het	.	2	89296772	89296772	A	G	het	46.64	20
2	89297149	89297149	T	C	exonic	Olfr1230	.	nonsynonymous SNV	Olfr1230:NM_146789:exon1:c.C120G:p.N40K	.	het	.	2	89297149	89297149	T	C	het	91.64	16
2	89339544	89339544	A	G	exonic	Olfr1233	.	nonsynonymous SNV	Olfr1233:NM_146972:exon2:c.A757C:p.M253L	.	het	.	2	89339544	89339544	A	G	het	37.64	27
2	89339596	89339596	A	C	exonic	Olfr1233	.	nonsynonymous SNV	Olfr1233:NM_146972:exon2:c.C705G:p.S235R	.	het	.	2	89339596	89339596	A	C	het	55.64	28
2	89339634	89339634	T	C	exonic	Olfr1233	.	nonsynonymous SNV	Olfr1233:NM_146972:exon2:c.A667G:p.S223G	.	het	.	2	89339634	89339634	T	C	het	33.64	27
2	89363115	89363115	0	T	exonic	Olfr1234	.	nonsynonymous SNV	Olfr1234:NM_146973:exon1:c.T313A:p.F105I	.	het	.	2	89363115	89363115	-	T	het	178.60	13
2	89363116	89363116	C	G	exonic	Olfr1234	.	nonsynonymous SNV	Olfr1234:NM_146973:exon1:c.A312C:p.L104F	.	het	.	2	89363116	89363116	C	G	het	178.64	13
2	89528022	89528022	C	T	exonic	Olfr1243	.	nonsynonymous SNV	Olfr1243:NM_146969:exon1:c.C387A:p.H129Q	.	het	.	2	89528022	89528022	C	T	het	126.64	25
2	89609539	89609539	T	C	exonic	Olfr1247	.	nonsynonymous SNV	Olfr1247:NM_146966:exon1:c.A562G:p.T188A	.	het	.	2	89609539	89609539	T	C	het	100.64	14
2	89610007	89610007	C	A	exonic	Olfr1247	.	nonsynonymous SNV	Olfr1247:NM_146966:exon1:c.A94T:p.M32L	.	het	.	2	89610007	89610007	C	A	het	127.64	15
2	89789295	89789295	T	A	exonic	Olfr1254	.	nonsynonymous SNV	Olfr1254:NM_146476:exon1:c.C56T:p.P19L	.	het	.	2	89789295	89789295	T	A	het	37.64	12
2	89930064	89930064	A	T	exonic	Olfr1258	.	nonsynonymous SNV	Olfr1258:NM_146978:exon1:c.A254T:p.H85L	.	het	.	2	89930064	89930064	A	T	het	25.64	19
2	89930376	89930376	A	T	exonic	Olfr1258	.	nonsynonymous SNV	Olfr1258:NM_146978:exon1:c.A566T:p.D189V	.	het	.	2	89930376	89930376	A	T	het	51.64	21
2	89930533	89930533	G	A	exonic	Olfr1258	.	nonsynonymous SNV	Olfr1258:NM_146978:exon1:c.C723A:p.H241Q	.	het	.	2	89930533	89930533	G	A	het	31.64	32
2	89930536	89930536	T	G	exonic	Olfr1258	.	nonsynonymous SNV	Olfr1258:NM_146978:exon1:c.A726G:p.I242M	.	het	.	2	89930536	89930536	T	G	het	31.64	32
2	89930631	89930631	T	A	exonic	Olfr1258	.	nonsynonymous SNV	Olfr1258:NM_146978:exon1:c.C821A:p.T274N	.	het	.	2	89930631	89930631	T	A	het	22.64	17
2	89930725	89930725	C	G	exonic	Olfr1258	.	nonsynonymous SNV	Olfr1258:NM_146978:exon1:c.T915G:p.D305E	.	het	.	2	89930725	89930725	C	G	het	155.64	27
2	89993660	89993660	G	A	exonic	Olfr1261	.	nonsynonymous SNV	Olfr1261:NM_146474:exon1:c.T266A:p.F89Y	.	het	.	2	89993660	89993660	G	A	het	109.64	29
2	89993675	89993675	G	A	exonic	Olfr1261	.	nonsynonymous SNV	Olfr1261:NM_146474:exon1:c.C281A:p.T94N	.	het	.	2	89993675	89993675	G	A	het	376.64	37
2	89993831	89993831	A	C	exonic	Olfr1261	.	nonsynonymous SNV	Olfr1261:NM_146474:exon1:c.T437C:p.L146S	.	het	.	2	89993831	89993831	A	C	het	146.64	37
2	89993838	89993838	A	G	exonic	Olfr1261	.	nonsynonymous SNV	Olfr1261:NM_146474:exon1:c.C444G:p.F148L	.	het	.	2	89993838	89993838	A	G	het	186.64	36
2	89994233	89994233	A	G	exonic	Olfr1261	.	nonsynonymous SNV	Olfr1261:NM_146474:exon1:c.T839G:p.L280R	.	het	.	2	89994233	89994233	A	G	het	45.64	33
2	90222031	90222031	T	G	exonic	Olfr1506;Olfr1565	.	nonsynonymous SNV	Olfr1565:NM_001270423:exon2:c.G466C:p.A156P,Olfr1506:NM_146265:exon2:c.G466C:p.A156P	.	het	.	2	90222031	90222031	T	G	het	174.64	16
2	90222219	90222219	G	A	exonic	Olfr1506;Olfr1565	.	nonsynonymous SNV	Olfr1565:NM_001270423:exon2:c.G278T:p.W93L,Olfr1506:NM_146265:exon2:c.G278T:p.W93L	.	het	.	2	90222219	90222219	G	A	het	182.64	18
2	90436563	90436563	G	A	exonic	Ptprj	.	nonsynonymous SNV	Ptprj:NM_001135657:exon24:c.G3621T:p.Q1207H,Ptprj:NM_008982:exon24:c.G3564T:p.Q1188H	.	het	.	2	90436563	90436563	G	A	het	64.64	21
2	90436564	90436564	G	C	exonic	Ptprj	.	nonsynonymous SNV	Ptprj:NM_001135657:exon24:c.A3620G:p.Q1207R,Ptprj:NM_008982:exon24:c.A3563G:p.Q1188R	.	het	.	2	90436564	90436564	G	C	het	64.64	20
2	90436566	90436566	T	C	exonic	Ptprj	.	nonsynonymous SNV	Ptprj:NM_001135657:exon24:c.C3618G:p.D1206E,Ptprj:NM_008982:exon24:c.C3561G:p.D1187E	.	het	.	2	90436566	90436566	T	C	het	312.63	20
2	90439954	90439954	T	C	exonic	Ptprj	.	nonsynonymous SNV	Ptprj:NM_001135657:exon23:c.A3518G:p.D1173G,Ptprj:NM_008982:exon23:c.A3461G:p.D1154G	.	het	.	2	90439954	90439954	T	C	het	108.64	24
2	90708934	90708934	G	T	exonic	Nup160	.	nonsynonymous SNV	Nup160:NM_021512:exon21:c.A2456T:p.N819I	.	het	.	2	90708934	90708934	G	T	het	223.64	13
2	90853102	90853102	G	C	exonic	Mtch2	.	nonsynonymous SNV	Mtch2:NM_001317243:exon4:c.G331C:p.V111L,Mtch2:NM_001317242:exon5:c.G385C:p.V129L,Mtch2:NM_019758:exon5:c.G358C:p.V120L	.	het	.	2	90853102	90853102	G	C	het	77.64	17
2	90859522	90859522	C	G	exonic	Mtch2	.	nonsynonymous SNV	Mtch2:NM_001317243:exon8:c.T559G:p.C187G,Mtch2:NM_001317242:exon9:c.T613G:p.C205G,Mtch2:NM_001317244:exon9:c.T205G:p.C69G,Mtch2:NM_019758:exon9:c.T586G:p.C196G	.	het	.	2	90859522	90859522	C	G	het	31.64	14
2	90859545	90859545	A	G	exonic	Mtch2	.	nonsynonymous SNV	Mtch2:NM_001317243:exon8:c.C582G:p.I194M,Mtch2:NM_001317242:exon9:c.C636G:p.I212M,Mtch2:NM_001317244:exon9:c.C228G:p.I76M,Mtch2:NM_019758:exon9:c.C609G:p.I203M	.	het	.	2	90859545	90859545	A	G	het	289.64	21
2	90859547	90859547	A	G	exonic	Mtch2	.	nonsynonymous SNV	Mtch2:NM_001317243:exon8:c.A584G:p.N195S,Mtch2:NM_001317242:exon9:c.A638G:p.N213S,Mtch2:NM_001317244:exon9:c.A230G:p.N77S,Mtch2:NM_019758:exon9:c.A611G:p.N204S	.	het	.	2	90859547	90859547	A	G	het	289.64	21
2	90859561	90859561	A	C	exonic	Mtch2	.	nonsynonymous SNV	Mtch2:NM_001317243:exon8:c.G598C:p.D200H,Mtch2:NM_001317242:exon9:c.G652C:p.D218H,Mtch2:NM_001317244:exon9:c.G244C:p.D82H,Mtch2:NM_019758:exon9:c.G625C:p.D209H	.	het	.	2	90859561	90859561	A	C	het	286.64	22
2	90863610	90863610	A	G	exonic	Mtch2	.	nonsynonymous SNV	Mtch2:NM_001317243:exon11:c.C743G:p.P248R,Mtch2:NM_001317242:exon12:c.C797G:p.P266R,Mtch2:NM_001317244:exon12:c.C389G:p.P130R,Mtch2:NM_019758:exon12:c.C770G:p.P257R	.	het	.	2	90863610	90863610	A	G	het	136.64	27
2	90863615	90863615	T	G	exonic	Mtch2	.	nonsynonymous SNV	Mtch2:NM_001317243:exon11:c.T748G:p.S250A,Mtch2:NM_001317242:exon12:c.T802G:p.S268A,Mtch2:NM_001317244:exon12:c.T394G:p.S132A,Mtch2:NM_019758:exon12:c.T775G:p.S259A	.	het	.	2	90863615	90863615	T	G	het	136.64	27
2	91055948	91055948	A	G	exonic	Psmc3	.	nonsynonymous SNV	Psmc3:NM_008948:exon6:c.C506G:p.T169S	.	het	.	2	91055948	91055948	A	G	het	118.64	33
2	91055960	91055960	A	G	exonic	Psmc3	.	nonsynonymous SNV	Psmc3:NM_008948:exon6:c.C518G:p.S173C	.	het	.	2	91055960	91055960	A	G	het	102.64	26
2	91055995	91055995	A	G	exonic	Psmc3	.	nonsynonymous SNV	Psmc3:NM_008948:exon6:c.A553G:p.T185A	.	het	.	2	91055995	91055995	A	G	het	129.64	21
2	91056026	91056026	G	C	exonic	Psmc3	.	nonsynonymous SNV	Psmc3:NM_008948:exon6:c.A584C:p.D195A	.	het	.	2	91056026	91056026	G	C	het	61.64	15
2	91066033	91066033	T	G	exonic	Slc39a13	.	nonsynonymous SNV	Slc39a13:NM_001290765:exon3:c.A395C:p.Y132S,Slc39a13:NM_026721:exon3:c.A395C:p.Y132S	.	het	.	2	91066033	91066033	T	G	het	170.64	21
2	91562773	91562773	G	T	exonic	Ckap5	.	nonsynonymous SNV	Ckap5:NM_029437:exon9:c.A1103T:p.E368V,Ckap5:NM_001165989:exon10:c.A1103T:p.E368V	.	het	.	2	91562773	91562773	G	T	het	139.64	26
2	91562776	91562776	C	T	exonic	Ckap5	.	nonsynonymous SNV	Ckap5:NM_029437:exon9:c.A1106T:p.K369I,Ckap5:NM_001165989:exon10:c.A1106T:p.K369I	.	het	.	2	91562776	91562776	C	T	het	46.64	27
2	91562778	91562778	G	A	exonic	Ckap5	.	nonsynonymous SNV	Ckap5:NM_029437:exon9:c.T1108A:p.F370I,Ckap5:NM_001165989:exon10:c.T1108A:p.F370I	.	het	.	2	91562778	91562778	G	A	het	46.64	27
2	91562816	91562816	C	T	exonic	Ckap5	.	nonsynonymous SNV	Ckap5:NM_029437:exon9:c.G1146T:p.Q382H,Ckap5:NM_001165989:exon10:c.G1146T:p.Q382H	.	het	.	2	91562816	91562816	C	T	het	112.64	26
2	91594687	91594687	A	G	exonic	Ckap5	.	nonsynonymous SNV	Ckap5:NM_029437:exon28:c.T3542G:p.L1181R,Ckap5:NM_001165989:exon29:c.T3542G:p.L1181R	.	het	.	2	91594687	91594687	A	G	het	148.64	23
2	91987037	91987037	A	G	exonic	Creb3l1	.	nonsynonymous SNV	Creb3l1:NM_011957:exon9:c.T1130C:p.M377T	.	het	.	2	91987037	91987037	A	G	het	30.64	13
2	91990714	91990714	C	T	exonic	Creb3l1	.	nonsynonymous SNV	Creb3l1:NM_011957:exon8:c.G1024A:p.A342T	.	het	.	2	91990714	91990714	C	T	het	147.64	29
2	91990746	91990746	G	A	exonic	Creb3l1	.	nonsynonymous SNV	Creb3l1:NM_011957:exon8:c.A992T:p.E331V	.	het	.	2	91990746	91990746	G	A	het	70.64	27
2	91991162	91991162	0	A	exonic	Creb3l1	.	nonsynonymous SNV	Creb3l1:NM_011957:exon6:c.G867T:p.K289N	.	het	.	2	91991162	91991162	-	A	het	23.60	10
2	91992030	91992030	G	A	exonic	Creb3l1	.	nonsynonymous SNV	Creb3l1:NM_011957:exon5:c.A610T:p.M204L	.	het	.	2	91992030	91992030	G	A	het	77.64	14
2	103683370	103683370	A	G	exonic	Abtb2	.	nonsynonymous SNV	Abtb2:NM_178890:exon3:c.C1123G:p.Q375E	.	het	.	2	103683370	103683370	A	G	het	92.64	17
2	104249372	104249372	C	T	exonic	D430041D05Rik	.	nonsynonymous SNV	D430041D05Rik:NM_001033347:exon5:c.T1313A:p.V438E,D430041D05Rik:NM_001368844:exon5:c.T1313A:p.V438E	.	het	.	2	104249372	104249372	C	T	het	371.64	14
2	104654161	104654161	G	C	exonic	Cstf3	.	nonsynonymous SNV	Cstf3:NM_145529:exon14:c.G1129C:p.V377L	.	het	.	2	104654161	104654161	G	C	het	99.64	16
2	104654192	104654192	C	A	exonic	Cstf3	.	nonsynonymous SNV	Cstf3:NM_145529:exon14:c.G1160A:p.R387K	.	het	.	2	104654192	104654192	C	A	het	116.64	16
2	104688472	104688472	C	T	exonic	Tcp11l1	.	nonsynonymous SNV	Tcp11l1:NM_177190:exon7:c.C878A:p.S293Y	.	het	.	2	104688472	104688472	C	T	het	244.64	18
2	104780240	104780240	T	A	exonic	Qser1	.	nonsynonymous SNV	Qser1:NM_001123327:exon4:c.G3697T:p.A1233S	.	het	.	2	104780240	104780240	T	A	het	139.64	19
2	104787134	104787134	C	A	exonic	Qser1	.	nonsynonymous SNV	Qser1:NM_001123327:exon3:c.G3062T:p.G1021V	.	het	.	2	104787134	104787134	C	A	het	114.64	11
2	104787656	104787656	C	A	exonic	Qser1	.	nonsynonymous SNV	Qser1:NM_001123327:exon3:c.G2540T:p.S847I	.	het	.	2	104787656	104787656	C	A	het	210.64	31
2	104787660	104787660	G	T	exonic	Qser1	.	nonsynonymous SNV	Qser1:NM_001123327:exon3:c.G2536A:p.E846K	.	het	.	2	104787660	104787660	G	T	het	210.64	31
2	104787798	104787798	C	T	exonic	Qser1	.	nonsynonymous SNV	Qser1:NM_001123327:exon3:c.T2398A:p.S800T	.	het	.	2	104787798	104787798	C	T	het	106.64	36
2	104787885	104787885	G	T	exonic	Qser1	.	nonsynonymous SNV	Qser1:NM_001123327:exon3:c.C2311A:p.Q771K	.	het	.	2	104787885	104787885	G	T	het	91.64	16
2	107295058	107295058	C	A	exonic	Kcna4	.	nonsynonymous SNV	Kcna4:NM_021275:exon2:c.G136A:p.A46T	.	het	.	2	107295058	107295058	C	A	het	46.64	12
2	107296283	107296283	A	T	exonic	Kcna4	.	nonsynonymous SNV	Kcna4:NM_021275:exon2:c.G1361T:p.R454L	.	het	.	2	107296283	107296283	A	T	het	307.64	15
2	107296288	107296288	T	C	exonic	Kcna4	.	nonsynonymous SNV	Kcna4:NM_021275:exon2:c.T1366C:p.F456L	.	het	.	2	107296288	107296288	T	C	het	307.64	15
2	107296300	107296300	T	G	exonic	Kcna4	.	nonsynonymous SNV	Kcna4:NM_021275:exon2:c.A1378G:p.R460G	.	het	.	2	107296300	107296300	T	G	het	160.64	19
2	107296307	107296307	G	A	exonic	Kcna4	.	nonsynonymous SNV	Kcna4:NM_021275:exon2:c.C1385A:p.S462Y	.	het	.	2	107296307	107296307	G	A	het	160.64	19
2	107296564	107296564	C	T	exonic	Kcna4	.	nonsynonymous SNV	Kcna4:NM_021275:exon2:c.G1642T:p.A548S	.	het	.	2	107296564	107296564	C	T	het	28.64	18
2	109293070	109293070	T	C	exonic	Kif18a	.	nonsynonymous SNV	Kif18a:NM_139303:exon5:c.G688C:p.A230P	.	het	.	2	109293070	109293070	T	C	het	61.64	22
2	109293073	109293073	C	T	exonic	Kif18a	.	nonsynonymous SNV	Kif18a:NM_139303:exon5:c.G691T:p.V231F	.	het	.	2	109293073	109293073	C	T	het	67.64	20
2	109294941	109294941	A	G	exonic	Kif18a	.	nonsynonymous SNV	Kif18a:NM_139303:exon6:c.T702G:p.I234M	.	het	.	2	109294941	109294941	A	G	het	35.64	10
2	109298137	109298137	G	C	exonic	Kif18a	.	nonsynonymous SNV	Kif18a:NM_139303:exon8:c.G1137C:p.M379I	.	het	.	2	109298137	109298137	G	C	het	35.64	10
2	110268269	110268269	A	G	exonic	Bbox1	.	nonsynonymous SNV	Bbox1:NM_130452:exon6:c.T962C:p.M321T	.	het	.	2	110268269	110268269	A	G	het	49.64	11
2	110268272	110268272	T	C	exonic	Bbox1	.	nonsynonymous SNV	Bbox1:NM_130452:exon6:c.T959G:p.L320R	.	het	.	2	110268272	110268272	T	C	het	49.64	11
2	110362309	110362309	A	C	exonic	Fibin	.	nonsynonymous SNV	Fibin:NM_026271:exon1:c.C487G:p.L163V	.	het	.	2	110362309	110362309	A	C	het	103.64	14
2	110362530	110362530	A	G	exonic	Fibin	.	nonsynonymous SNV	Fibin:NM_026271:exon1:c.G266C:p.R89P	.	het	.	2	110362530	110362530	A	G	het	183.64	22
2	110362542	110362542	C	A	exonic	Fibin	.	nonsynonymous SNV	Fibin:NM_026271:exon1:c.C254T:p.T85I	.	het	.	2	110362542	110362542	C	A	het	69.64	18
2	110362563	110362563	A	T	exonic	Fibin	.	nonsynonymous SNV	Fibin:NM_026271:exon1:c.T233A:p.L78H	.	het	.	2	110362563	110362563	A	T	het	72.64	17
2	110362590	110362590	G	A	exonic	Fibin	.	nonsynonymous SNV	Fibin:NM_026271:exon1:c.G206T:p.G69V	.	het	.	2	110362590	110362590	G	A	het	112.64	19
2	111159551	111159551	A	C	exonic	A26c3	.	nonsynonymous SNV	A26c3:NM_001378593:exon25:c.T1961G:p.I654S	.	het	.	2	111159551	111159551	A	C	het	142.64	25
2	111257906	111257906	T	C	exonic	Olfr1276	.	nonsynonymous SNV	Olfr1276:NM_146395:exon1:c.A790C:p.T264P	.	het	.	2	111257906	111257906	T	C	het	167.64	19
2	111483516	111483516	A	G	exonic	Olfr1289	.	nonsynonymous SNV	Olfr1289:NM_146404:exon1:c.C85G:p.L29V	.	het	.	2	111483516	111483516	A	G	het	28.64	15
2	111664421	111664421	A	C	exonic	Olfr1299	.	nonsynonymous SNV	Olfr1299:NM_146884:exon2:c.A194C:p.N65T	.	het	.	2	111664421	111664421	A	C	het	172.64	15
2	111664699	111664699	G	C	exonic	Olfr1299	.	nonsynonymous SNV	Olfr1299:NM_146884:exon2:c.A472C:p.S158R	.	het	.	2	111664699	111664699	G	C	het	28.64	15
2	111664801	111664801	G	A	exonic	Olfr1299	.	nonsynonymous SNV	Olfr1299:NM_146884:exon2:c.T574A:p.S192T	.	het	.	2	111664801	111664801	G	A	het	73.64	18
2	111754618	111754618	A	G	exonic	Olfr1301	.	nonsynonymous SNV	Olfr1301:NM_146887:exon1:c.A368G:p.Y123C	.	het	.	2	111754618	111754618	A	G	het	73.64	37
2	111754636	111754636	C	T	exonic	Olfr1301	.	nonsynonymous SNV	Olfr1301:NM_146887:exon1:c.C386T:p.P129L	.	het	.	2	111754636	111754636	C	T	het	238.64	38
2	111754894	111754894	T	A	exonic	Olfr1301	.	nonsynonymous SNV	Olfr1301:NM_146887:exon1:c.T644A:p.L215H	.	het	.	2	111754894	111754894	T	A	het	106.64	22
2	111754915	111754915	C	A	exonic	Olfr1301	.	nonsynonymous SNV	Olfr1301:NM_146887:exon1:c.T665A:p.L222H	.	het	.	2	111754915	111754915	C	A	het	68.64	28
2	111754968	111754968	T	A	exonic	Olfr1301	.	nonsynonymous SNV	Olfr1301:NM_146887:exon1:c.T718A:p.C240S	.	het	.	2	111754968	111754968	T	A	het	55.04	13
2	111755042	111755042	A	G	exonic	Olfr1301	.	nonsynonymous SNV	Olfr1301:NM_146887:exon1:c.C792G:p.I264M	.	het	.	2	111755042	111755042	A	G	het	124.64	16
2	111755119	111755119	G	A	exonic	Olfr1301	.	nonsynonymous SNV	Olfr1301:NM_146887:exon1:c.G869A:p.R290K	.	het	.	2	111755119	111755119	G	A	het	30.64	27
2	112008794	112008794	C	T	exonic	Olfr1310	.	nonsynonymous SNV	Olfr1310:NM_146449:exon1:c.C391A:p.H131N	.	het	.	2	112008794	112008794	C	T	het	31.64	17
2	112009069	112009069	A	G	exonic	Olfr1310	.	nonsynonymous SNV	Olfr1310:NM_146449:exon1:c.T116C:p.L39P	.	het	.	2	112009069	112009069	A	G	het	80.64	13
2	112407659	112407659	T	A	exonic	Katnbl1	.	nonsynonymous SNV	Katnbl1:NM_024254:exon5:c.T497A:p.F166Y	.	het	.	2	112407659	112407659	T	A	het	82.64	15
2	112408591	112408591	G	A	exonic	Katnbl1	.	nonsynonymous SNV	Katnbl1:NM_024254:exon7:c.T661A:p.L221I	.	het	.	2	112408591	112408591	G	A	het	28.64	15
2	112754879	112754879	A	G	exonic	Ryr3	.	nonsynonymous SNV	Ryr3:NM_001319156:exon57:c.A8361C:p.K2787N	.	het	.	2	112754879	112754879	A	G	het	67.64	29
2	112957211	112957211	T	G	exonic	Ryr3	.	nonsynonymous SNV	Ryr3:NM_001319156:exon7:c.G635C:p.S212T	.	het	.	2	112957211	112957211	T	G	het	163.64	18
2	114143104	114143104	C	T	exonic	Aqr	.	nonsynonymous SNV	Aqr:NM_001290788:exon15:c.C1226A:p.S409Y,Aqr:NM_009702:exon15:c.C1226A:p.S409Y	.	het	.	2	114143104	114143104	C	T	het	138.64	18
2	114146989	114146989	A	G	exonic	Aqr	.	nonsynonymous SNV	Aqr:NM_001290788:exon13:c.G1018C:p.A340P,Aqr:NM_009702:exon13:c.G1018C:p.A340P	.	het	.	2	114146989	114146989	A	G	het	57.64	11
2	118709091	118709091	T	G	exonic	Plcb2	.	nonsynonymous SNV	Plcb2:NM_001290790:exon31:c.G3385C:p.D1129H,Plcb2:NM_177568:exon32:c.G3454C:p.D1152H	.	het	.	2	118709091	118709091	T	G	het	103.64	23
2	118709096	118709096	T	C	exonic	Plcb2	.	nonsynonymous SNV	Plcb2:NM_001290790:exon31:c.C3380G:p.A1127G,Plcb2:NM_177568:exon32:c.C3449G:p.A1150G	.	het	.	2	118709096	118709096	T	C	het	103.64	23
2	118709121	118709121	C	G	exonic	Plcb2	.	nonsynonymous SNV	Plcb2:NM_001290790:exon31:c.T3355C:p.F1119L,Plcb2:NM_177568:exon32:c.T3424C:p.F1142L	.	het	.	2	118709121	118709121	C	G	het	66.64	19
2	118709135	118709135	T	C	exonic	Plcb2	.	nonsynonymous SNV	Plcb2:NM_001290790:exon31:c.C3341G:p.S1114W,Plcb2:NM_177568:exon32:c.C3410G:p.S1137W	.	het	.	2	118709135	118709135	T	C	het	76.64	17
2	118709164	118709164	C	T	exonic	Plcb2	.	nonsynonymous SNV	Plcb2:NM_001290790:exon31:c.G3312A:p.M1104I,Plcb2:NM_177568:exon32:c.G3381A:p.M1127I	.	het	.	2	118709164	118709164	C	T	het	34.64	18
2	118719196	118719196	C	T	exonic	Plcb2	.	nonsynonymous SNV	Plcb2:NM_001290790:exon9:c.C846A:p.H282Q,Plcb2:NM_177568:exon10:c.C915A:p.H305Q	.	het	.	2	118719196	118719196	C	T	het	319.64	15
2	118719229	118719229	A	C	exonic	Plcb2	.	nonsynonymous SNV	Plcb2:NM_001290790:exon9:c.T813G:p.F271L,Plcb2:NM_177568:exon10:c.T882G:p.F294L	.	het	.	2	118719229	118719229	A	C	het	278.64	15
2	118926685	118926685	0	T	exonic	Chst14	.	nonsynonymous SNV	Chst14:NM_028117:exon1:c.C34T:p.P12S	.	het	.	2	118926685	118926685	-	T	het	169.60	13
2	118926932	118926932	0	G	exonic	Chst14	.	nonsynonymous SNV	Chst14:NM_028117:exon1:c.C281G:p.S94C	.	het	.	2	118926932	118926932	-	G	het	151.60	25
2	118926940	118926940	T	A	exonic	Chst14	.	nonsynonymous SNV	Chst14:NM_028117:exon1:c.G289A:p.A97T	.	het	.	2	118926940	118926940	T	A	het	148.64	26
2	118926980	118926980	C	T	exonic	Chst14	.	nonsynonymous SNV	Chst14:NM_028117:exon1:c.A329T:p.N110I	.	het	.	2	118926980	118926980	C	T	het	256.64	17
2	118926983	118926983	G	C	exonic	Chst14	.	nonsynonymous SNV	Chst14:NM_028117:exon1:c.G332C:p.R111P	.	het	.	2	118926983	118926983	G	C	het	298.64	18
2	118926986	118926986	C	T	exonic	Chst14	.	nonsynonymous SNV	Chst14:NM_028117:exon1:c.C335T:p.T112I	.	het	.	2	118926986	118926986	C	T	het	298.64	18
2	118927012	118927012	T	C	exonic	Chst14	.	nonsynonymous SNV	Chst14:NM_028117:exon1:c.G361C:p.G121R	.	het	.	2	118927012	118927012	T	C	het	88.64	13
2	118927013	118927013	C	T	exonic	Chst14	.	nonsynonymous SNV	Chst14:NM_028117:exon1:c.G362T:p.G121V	.	het	.	2	118927013	118927013	C	T	het	88.64	13
2	119064054	119064054	C	T	exonic	Knl1	.	nonsynonymous SNV	Knl1:NM_001362732:exon6:c.G207T:p.Q69H,Knl1:NM_029617:exon6:c.G207T:p.Q69H	.	het	.	2	119064054	119064054	C	T	het	34.64	12
2	119064058	119064058	G	A	exonic	Knl1	.	nonsynonymous SNV	Knl1:NM_001362732:exon6:c.G211A:p.E71K,Knl1:NM_029617:exon6:c.G211A:p.E71K	.	het	.	2	119064058	119064058	G	A	het	46.64	12
2	119064083	119064083	A	C	exonic	Knl1	.	nonsynonymous SNV	Knl1:NM_001362732:exon6:c.A236C:p.N79T,Knl1:NM_029617:exon6:c.A236C:p.N79T	.	het	.	2	119064083	119064083	A	C	het	311.64	13
2	119088818	119088818	A	G	exonic	Knl1	.	nonsynonymous SNV	Knl1:NM_029617:exon15:c.A5450G:p.Q1817R	.	het	.	2	119088818	119088818	A	G	het	127.64	15
2	119088821	119088821	T	C	exonic	Knl1	.	nonsynonymous SNV	Knl1:NM_029617:exon15:c.T5453C:p.I1818T	.	het	.	2	119088821	119088821	T	C	het	127.64	15
2	119088852	119088852	T	C	exonic	Knl1	.	nonsynonymous SNV	Knl1:NM_029617:exon15:c.G5484C:p.K1828N	.	het	.	2	119088852	119088852	T	C	het	40.64	14
2	119116392	119116392	A	G	exonic	Rad51	.	nonsynonymous SNV	Rad51:NM_011234:exon2:c.C79G:p.R27G	.	het	.	2	119116392	119116392	A	G	het	132.64	12
2	119172017	119172017	G	A	exonic	Gchfr	.	nonsynonymous SNV	Gchfr:NM_177157:exon3:c.C207A:p.S69R	.	het	.	2	119172017	119172017	G	A	het	57.64	19
2	119293036	119293036	A	C	exonic	Vps18	.	nonsynonymous SNV	Vps18:NM_172269:exon4:c.A443C:p.N148T	.	het	.	2	119293036	119293036	A	C	het	97.64	10
2	119293041	119293041	C	A	exonic	Vps18	.	nonsynonymous SNV	Vps18:NM_172269:exon4:c.G448A:p.A150T	.	het	.	2	119293041	119293041	C	A	het	157.64	14
2	119293044	119293044	A	G	exonic	Vps18	.	nonsynonymous SNV	Vps18:NM_172269:exon4:c.A451G:p.M151V	.	het	.	2	119293044	119293044	A	G	het	157.64	14
2	119293599	119293599	G	A	exonic	Vps18	.	nonsynonymous SNV	Vps18:NM_172269:exon4:c.C1006A:p.L336I	.	het	.	2	119293599	119293599	G	A	het	86.64	11
2	119293645	119293645	C	T	exonic	Vps18	.	nonsynonymous SNV	Vps18:NM_172269:exon4:c.G1052T:p.G351V	.	het	.	2	119293645	119293645	C	T	het	128.64	12
2	119293713	119293713	C	G	exonic	Vps18	.	nonsynonymous SNV	Vps18:NM_172269:exon4:c.T1120G:p.S374A	.	het	.	2	119293713	119293713	C	G	het	44.64	10
2	119353481	119353481	A	C	exonic	Chac1	.	nonsynonymous SNV	Chac1:NM_026929:exon3:c.A563C:p.Q188P	.	het	.	2	119353481	119353481	A	C	het	52.64	10
2	119374551	119374551	T	C	exonic	Ino80	.	nonsynonymous SNV	Ino80:NM_026574:exon36:c.C4493G:p.S1498C	.	het	.	2	119374551	119374551	T	C	het	205.64	19
2	119374569	119374569	C	T	exonic	Ino80	.	nonsynonymous SNV	Ino80:NM_026574:exon36:c.G4475A:p.S1492N	.	het	.	2	119374569	119374569	C	T	het	240.64	19
2	119381974	119381974	G	A	exonic	Ino80	.	nonsynonymous SNV	Ino80:NM_026574:exon32:c.G3866T:p.R1289L	.	het	.	2	119381974	119381974	G	A	het	171.64	20
2	119439415	119439415	A	G	exonic	Ino80	.	nonsynonymous SNV	Ino80:NM_026574:exon14:c.A1748C:p.N583T	.	het	.	2	119439415	119439415	A	G	het	205.64	34
2	119538838	119538838	A	G	exonic	Exd1	.	nonsynonymous SNV	Exd1:NM_172857:exon6:c.A295C:p.N99H	.	het	.	2	119538838	119538838	A	G	het	49.64	11
2	119665747	119665747	0	T	exonic	H3f3c	.	nonsynonymous SNV	H3f3c:NM_001370931:exon1:c.G290A:p.S97N	.	het	.	2	119665747	119665747	-	T	het	28.60	23
2	119665769	119665769	T	C	exonic	H3f3c	.	nonsynonymous SNV	H3f3c:NM_001370931:exon1:c.A268G:p.I90V	.	het	.	2	119665769	119665769	T	C	het	226.64	27
2	119665771	119665771	A	T	exonic	H3f3c	.	nonsynonymous SNV	H3f3c:NM_001370931:exon1:c.C266A:p.A89D	.	het	.	2	119665771	119665771	A	T	het	226.64	27
2	119665805	119665805	A	T	exonic	H3f3c	.	nonsynonymous SNV	H3f3c:NM_001370931:exon1:c.G232A:p.D78N	.	het	.	2	119665805	119665805	A	T	het	223.64	25
2	119665849	119665849	T	C	exonic	H3f3c	.	nonsynonymous SNV	H3f3c:NM_001370931:exon1:c.T188G:p.I63S	.	het	.	2	119665849	119665849	T	C	het	52.64	25
2	119665852	119665852	G	T	exonic	H3f3c	.	nonsynonymous SNV	H3f3c:NM_001370931:exon1:c.T185A:p.L62Q	.	het	.	2	119665852	119665852	G	T	het	49.64	26
2	119665999	119665999	T	A	exonic	H3f3c	.	nonsynonymous SNV	H3f3c:NM_001370931:exon1:c.G38T:p.G13V	.	het	.	2	119665999	119665999	T	A	het	205.64	19
2	119774160	119774160	0	A	exonic	Rpap1	.	nonsynonymous SNV	Rpap1:NM_001163701:exon10:c.G1266T:p.Q422H,Rpap1:NM_177294:exon11:c.G1266T:p.Q422H	.	het	.	2	119774160	119774160	-	A	het	244.60	31
2	119774161	119774161	T	A	exonic	Rpap1	.	nonsynonymous SNV	Rpap1:NM_001163701:exon10:c.A1265T:p.Q422L,Rpap1:NM_177294:exon11:c.A1265T:p.Q422L	.	het	.	2	119774161	119774161	T	A	het	244.64	31
2	120011004	120011004	T	C	exonic	Mapkbp1	.	nonsynonymous SNV	Mapkbp1:NM_001355293:exon4:c.A275C:p.K92T,Mapkbp1:NM_011941:exon4:c.A275C:p.K92T	.	het	.	2	120011004	120011004	T	C	het	36.64	11
2	120011058	120011058	C	T	exonic	Mapkbp1	.	nonsynonymous SNV	Mapkbp1:NM_001355293:exon4:c.A329T:p.E110V,Mapkbp1:NM_011941:exon4:c.A329T:p.E110V	.	het	.	2	120011058	120011058	C	T	het	63.64	13
2	120036457	120036457	C	T	exonic	Pla2g4b	.	nonsynonymous SNV	Pla2g4b:NM_145378:exon8:c.A580T:p.T194S	.	het	.	2	120036457	120036457	C	T	het	30.64	13
2	120041572	120041572	A	G	exonic	Pla2g4b	.	nonsynonymous SNV	Pla2g4b:NM_145378:exon20:c.C2333G:p.A778G	.	het	.	2	120041572	120041572	A	G	het	58.83	22
2	120041575	120041575	T	A	exonic	Pla2g4b	.	nonsynonymous SNV	Pla2g4b:NM_145378:exon20:c.T2336A:p.V779E	.	het	.	2	120041575	120041575	T	A	het	229.64	24
2	120041578	120041578	C	T	exonic	Pla2g4b	.	nonsynonymous SNV	Pla2g4b:NM_145378:exon20:c.A2339T:p.Q780L	.	het	.	2	120041578	120041578	C	T	het	55.64	24
2	120041579	120041579	C	T	exonic	Pla2g4b	.	nonsynonymous SNV	Pla2g4b:NM_145378:exon20:c.G2340T:p.Q780H	.	het	.	2	120041579	120041579	C	T	het	55.64	24
2	120041601	120041601	0	G	exonic	Pla2g4b	.	nonsynonymous SNV	Pla2g4b:NM_145378:exon20:c.T2362G:p.F788V	.	het	.	2	120041601	120041601	-	G	het	79.60	14
2	120063679	120063679	T	A	exonic	Sptbn5	.	nonsynonymous SNV	Sptbn5:NM_001370938:exon31:c.G5459T:p.R1820L	.	het	.	2	120063679	120063679	T	A	het	310.64	18
2	120403961	120403961	C	G	exonic	Tmem87a	.	nonsynonymous SNV	Tmem87a:NM_001110496:exon1:c.G100C:p.G34R,Tmem87a:NM_001110497:exon1:c.G100C:p.G34R,Tmem87a:NM_173734:exon1:c.G100C:p.G34R	.	het	.	2	120403961	120403961	C	G	het	130.64	14
2	120455993	120455993	T	C	exonic	Ganc	.	nonsynonymous SNV	Ganc:NM_172672:exon21:c.A2302C:p.I768L	.	het	.	2	120455993	120455993	T	C	het	70.64	12
2	120606019	120606019	G	A	exonic	Lrrc57	.	nonsynonymous SNV	Lrrc57:NM_001159609:exon5:c.A682T:p.I228F,Lrrc57:NM_001159610:exon5:c.A733T:p.I245F,Lrrc57:NM_001159612:exon5:c.A607T:p.I203F,Lrrc57:NM_025657:exon5:c.A607T:p.I203F	.	het	.	2	120606019	120606019	G	A	het	166.64	10
2	120606040	120606040	G	A	exonic	Lrrc57	.	nonsynonymous SNV	Lrrc57:NM_001159609:exon5:c.A661T:p.S221C,Lrrc57:NM_001159610:exon5:c.A712T:p.S238C,Lrrc57:NM_001159612:exon5:c.A586T:p.S196C,Lrrc57:NM_025657:exon5:c.A586T:p.S196C	.	het	.	2	120606040	120606040	G	A	het	40.64	14
2	120719184	120719184	A	G	exonic	Cdan1	.	nonsynonymous SNV	Cdan1:NM_026891:exon27:c.T3551C:p.I1184T	.	het	.	2	120719184	120719184	A	G	het	174.64	25
2	120719188	120719188	T	G	exonic	Cdan1	.	nonsynonymous SNV	Cdan1:NM_026891:exon27:c.G3547C:p.E1183Q	.	het	.	2	120719188	120719188	T	G	het	174.64	25
2	120720777	120720777	G	A	exonic	Cdan1	.	nonsynonymous SNV	Cdan1:NM_026891:exon25:c.G3261T:p.E1087D	.	het	.	2	120720777	120720777	G	A	het	44.64	10
2	120725597	120725597	C	T	exonic	Cdan1	.	nonsynonymous SNV	Cdan1:NM_026891:exon14:c.T2187A:p.H729Q	.	het	.	2	120725597	120725597	C	T	het	52.64	10
2	120822475	120822475	C	T	exonic	Ttbk2	.	nonsynonymous SNV	Ttbk2:NM_001024857:exon2:c.G67A:p.V23M,Ttbk2:NM_001024856:exon3:c.G67A:p.V23M,Ttbk2:NM_080788:exon3:c.G274A:p.V92M	.	het	.	2	120822475	120822475	C	T	het	43.64	19
2	120822507	120822507	A	G	exonic	Ttbk2	.	nonsynonymous SNV	Ttbk2:NM_001024857:exon2:c.G35C:p.S12T,Ttbk2:NM_001024856:exon3:c.G35C:p.S12T,Ttbk2:NM_080788:exon3:c.G242C:p.S81T	.	het	.	2	120822507	120822507	A	G	het	155.64	14
2	120822517	120822517	C	T	exonic	Ttbk2	.	nonsynonymous SNV	Ttbk2:NM_001024857:exon2:c.G25A:p.D9N,Ttbk2:NM_001024856:exon3:c.G25A:p.D9N,Ttbk2:NM_080788:exon3:c.G232A:p.D78N	.	het	.	2	120822517	120822517	C	T	het	133.64	13
2	120977309	120977309	0	C	exonic	Tmem62	.	nonsynonymous SNV	Tmem62:NM_175285:exon1:c.T11C:p.M4T	.	het	.	2	120977309	120977309	-	C	het	172.60	15
2	121160703	121160703	A	G	exonic	Zscan29	.	nonsynonymous SNV	Zscan29:NM_001290819:exon5:c.T2498C:p.L833P	.	het	.	2	121160703	121160703	A	G	het	49.64	11
2	121160745	121160745	T	C	exonic	Zscan29	.	nonsynonymous SNV	Zscan29:NM_001290819:exon5:c.C2456G:p.A819G	.	het	.	2	121160745	121160745	T	C	het	52.64	10
2	121160746	121160746	G	T	exonic	Zscan29	.	nonsynonymous SNV	Zscan29:NM_001290819:exon5:c.G2455A:p.A819T	.	het	.	2	121160746	121160746	G	T	het	52.64	10
2	121164200	121164200	C	T	exonic	Zscan29	.	nonsynonymous SNV	Zscan29:NM_001290819:exon4:c.G1198A:p.V400I	.	het	.	2	121164200	121164200	C	T	het	52.64	10
2	121166446	121166446	C	T	exonic	Zscan29	.	nonsynonymous SNV	Zscan29:NM_001290820:exon2:c.T475A:p.C159S,Zscan29:NM_001290819:exon3:c.T793A:p.C265S	.	het	.	2	121166446	121166446	C	T	het	22.64	20
2	121166466	121166466	G	T	exonic	Zscan29	.	nonsynonymous SNV	Zscan29:NM_001290820:exon2:c.T455A:p.F152Y,Zscan29:NM_001290819:exon3:c.T773A:p.F258Y	.	het	.	2	121166466	121166466	G	T	het	25.64	19
2	121166616	121166616	G	A	exonic	Zscan29	.	nonsynonymous SNV	Zscan29:NM_001290820:exon2:c.A305T:p.N102I,Zscan29:NM_001290819:exon3:c.A623T:p.N208I	.	het	.	2	121166616	121166616	G	A	het	107.64	13
2	121289794	121289794	T	C	exonic	Map1a	.	nonsynonymous SNV	Map1a:NM_032393:exon1:c.A160C:p.K54Q	.	het	.	2	121289794	121289794	T	C	het	40.64	10
2	121374731	121374731	C	T	exonic	Strc	.	nonsynonymous SNV	Strc:NM_080459:exon9:c.C2818A:p.P940T	.	het	.	2	121374731	121374731	C	T	het	119.64	12
2	121450769	121450769	T	A	exonic	Serf2	.	nonsynonymous SNV	Serf2:NM_001290837:exon3:c.G188A:p.R63K	.	het	.	2	121450769	121450769	T	A	het	43.64	10
2	121506534	121506534	C	T	exonic	Mfap1a	.	nonsynonymous SNV	Mfap1a:NM_026220:exon1:c.T8A:p.V3D	.	het	.	2	121506534	121506534	C	T	het	22.64	17
2	122328854	122328854	G	T	exonic	Duox1	.	nonsynonymous SNV	Duox1:NM_001099297:exon16:c.A2101T:p.T701S	.	het	.	2	122328854	122328854	G	T	het	88.64	18
2	122328873	122328873	C	A	exonic	Duox1	.	nonsynonymous SNV	Duox1:NM_001099297:exon16:c.C2120A:p.P707H	.	het	.	2	122328873	122328873	C	A	het	52.64	18
2	122333765	122333765	T	G	exonic	Duox1	.	nonsynonymous SNV	Duox1:NM_001099297:exon20:c.C2705G:p.S902C	.	het	.	2	122333765	122333765	T	G	het	65.64	15
2	122335841	122335841	T	A	exonic	Duox1	.	nonsynonymous SNV	Duox1:NM_001099297:exon21:c.G2824A:p.E942K	.	het	.	2	122335841	122335841	T	A	het	57.64	24
2	122335860	122335860	A	G	exonic	Duox1	.	nonsynonymous SNV	Duox1:NM_001099297:exon21:c.A2843G:p.K948R	.	het	.	2	122335860	122335860	A	G	het	93.64	22
2	122337618	122337618	A	G	exonic	Duox1	.	nonsynonymous SNV	Duox1:NM_001099297:exon24:c.A3223G:p.I1075V	.	het	.	2	122337618	122337618	A	G	het	79.64	16
2	122337631	122337631	C	G	exonic	Duox1	.	nonsynonymous SNV	Duox1:NM_001099297:exon24:c.C3236G:p.T1079S	.	het	.	2	122337631	122337631	C	G	het	82.64	15
2	122337660	122337660	T	C	exonic	Duox1	.	nonsynonymous SNV	Duox1:NM_001099297:exon24:c.A3265C:p.T1089P	.	het	.	2	122337660	122337660	T	C	het	112.64	13
2	122337787	122337787	T	C	exonic	Duox1	.	nonsynonymous SNV	Duox1:NM_001099297:exon24:c.G3392C:p.R1131P	.	het	.	2	122337787	122337787	T	C	het	140.64	20
2	122337816	122337816	T	G	exonic	Duox1	.	nonsynonymous SNV	Duox1:NM_001099297:exon24:c.A3421G:p.T1141A	.	het	.	2	122337816	122337816	T	G	het	52.64	21
2	122368894	122368894	G	C	exonic	Shf	.	nonsynonymous SNV	Shf:NM_001374011:exon1:c.C239G:p.P80R	.	het	.	2	122368894	122368894	G	C	het	55.64	24
2	122368895	122368895	G	T	exonic	Shf	.	nonsynonymous SNV	Shf:NM_001374011:exon1:c.C238A:p.P80T	.	het	.	2	122368895	122368895	G	T	het	55.64	24
2	122742693	122742693	G	C	exonic	Bloc1s6	.	nonsynonymous SNV	Bloc1s6:NM_019788:exon2:c.G187C:p.D63H	.	het	.	2	122742693	122742693	G	C	het	234.64	24
2	122744205	122744205	T	C	exonic	Bloc1s6	.	nonsynonymous SNV	Bloc1s6:NM_019788:exon3:c.A304C:p.N102H	.	het	.	2	122744205	122744205	T	C	het	229.64	11
2	122746064	122746064	C	T	exonic	Bloc1s6	.	nonsynonymous SNV	Bloc1s6:NM_019788:exon4:c.G322T:p.A108S	.	het	.	2	122746064	122746064	C	T	het	166.64	10
2	122746067	122746067	T	G	exonic	Bloc1s6	.	nonsynonymous SNV	Bloc1s6:NM_019788:exon4:c.A325G:p.K109E	.	het	.	2	122746067	122746067	T	G	het	52.64	10
2	122746069	122746069	T	C	exonic	Bloc1s6	.	nonsynonymous SNV	Bloc1s6:NM_019788:exon4:c.G327C:p.K109N	.	het	.	2	122746069	122746069	T	C	het	52.64	10
2	122746072	122746072	C	G	exonic	Bloc1s6	.	nonsynonymous SNV	Bloc1s6:NM_019788:exon4:c.C330G:p.H110Q	.	het	.	2	122746072	122746072	C	G	het	52.64	10
2	122746086	122746086	G	A	exonic	Bloc1s6	.	nonsynonymous SNV	Bloc1s6:NM_019788:exon4:c.T344A:p.L115Q	.	het	.	2	122746086	122746086	G	A	het	142.64	10
2	122746091	122746091	A	C	exonic	Bloc1s6	.	nonsynonymous SNV	Bloc1s6:NM_019788:exon4:c.A349C:p.T117P	.	het	.	2	122746091	122746091	A	C	het	39.64	10
2	125123398	125123398	T	G	exonic	Myef2	.	nonsynonymous SNV	Myef2:NM_001162417:exon1:c.A121C:p.N41H,Myef2:NM_001162418:exon1:c.A121C:p.N41H,Myef2:NM_010852:exon1:c.A121C:p.N41H	.	het	.	2	125123398	125123398	T	G	het	139.64	11
2	125123413	125123413	T	C	exonic	Myef2	.	nonsynonymous SNV	Myef2:NM_001162417:exon1:c.C106G:p.P36A,Myef2:NM_001162418:exon1:c.C106G:p.P36A,Myef2:NM_010852:exon1:c.C106G:p.P36A	.	het	.	2	125123413	125123413	T	C	het	139.64	11
2	125723287	125723287	A	G	exonic	Shc4	.	nonsynonymous SNV	Shc4:NM_199022:exon1:c.A91C:p.S31R	.	het	.	2	125723287	125723287	A	G	het	46.64	12
2	125983205	125983205	C	T	exonic	Galk2	.	nonsynonymous SNV	Galk2:NM_001291002:exon10:c.G1320T:p.K440N,Galk2:NM_175154:exon10:c.G1287T:p.K429N	.	het	.	2	125983205	125983205	C	T	het	149.64	20
2	126101000	126101000	C	G	exonic	Fam227b	.	nonsynonymous SNV	Fam227b:NM_029455:exon11:c.G876C:p.W292C	.	het	.	2	126101000	126101000	C	G	het	82.64	19
2	126587884	126587884	G	A	exonic	Slc27a2	.	nonsynonymous SNV	Slc27a2:NM_011978:exon10:c.C1811A:p.P604H	.	het	.	2	126587884	126587884	G	A	het	75.64	13
2	126742371	126742371	C	T	exonic	Usp8	.	nonsynonymous SNV	Usp8:NM_001252580:exon11:c.G1499T:p.R500I,Usp8:NM_019729:exon11:c.G1466T:p.R489I	.	het	.	2	126742371	126742371	C	T	het	40.64	11
2	126822545	126822545	G	C	exonic	Trpm7	.	nonsynonymous SNV	Trpm7:NM_001164325:exon21:c.T2913G:p.F971L,Trpm7:NM_021450:exon21:c.T2913G:p.F971L	.	het	.	2	126822545	126822545	G	C	het	35.64	10
2	126824082	126824082	T	C	exonic	Trpm7	.	nonsynonymous SNV	Trpm7:NM_001164325:exon20:c.T2603G:p.M868R,Trpm7:NM_021450:exon20:c.T2603G:p.M868R	.	het	.	2	126824082	126824082	T	C	het	52.64	10
2	126824085	126824085	C	G	exonic	Trpm7	.	nonsynonymous SNV	Trpm7:NM_001164325:exon20:c.T2600C:p.L867P,Trpm7:NM_021450:exon20:c.T2600C:p.L867P	.	het	.	2	126824085	126824085	C	G	het	52.64	10
2	126927757	126927757	C	T	exonic	Sppl2a	.	nonsynonymous SNV	Sppl2a:NM_023220:exon2:c.G178A:p.E60K	.	het	.	2	126927757	126927757	C	T	het	382.64	35
2	126927782	126927782	T	C	exonic	Sppl2a	.	nonsynonymous SNV	Sppl2a:NM_023220:exon2:c.C153G:p.N51K	.	het	.	2	126927782	126927782	T	C	het	52.64	27
2	126927822	126927822	G	A	exonic	Sppl2a	.	nonsynonymous SNV	Sppl2a:NM_023220:exon2:c.C113T:p.S38F	.	het	.	2	126927822	126927822	G	A	het	163.64	33
2	126927823	126927823	A	G	exonic	Sppl2a	.	nonsynonymous SNV	Sppl2a:NM_023220:exon2:c.T112C:p.S38P	.	het	.	2	126927823	126927823	A	G	het	163.64	33
2	127037857	127037857	0	T	exonic	Ap4e1	.	nonsynonymous SNV	Ap4e1:NM_175550:exon8:c.A938T:p.Y313F	.	het	.	2	127037857	127037857	-	T	het	79.60	16
2	127049450	127049450	A	C	exonic	Ap4e1	.	nonsynonymous SNV	Ap4e1:NM_175550:exon14:c.T1736C:p.V579A	.	het	.	2	127049450	127049450	A	C	het	125.64	10
2	127086040	127086040	G	A	exonic	Blvra	.	nonsynonymous SNV	Blvra:NM_026678:exon4:c.C209A:p.A70D	.	het	.	2	127086040	127086040	G	A	het	53.64	10
2	127104258	127104258	T	A	exonic	Ncaph	.	nonsynonymous SNV	Ncaph:NM_144818:exon18:c.A2159T:p.E720V	.	het	.	2	127104258	127104258	T	A	het	85.64	14
2	127104270	127104270	0	T	exonic	Ncaph	.	nonsynonymous SNV	Ncaph:NM_144818:exon18:c.T2147A:p.L716Q	.	het	.	2	127104270	127104270	-	T	het	88.60	13
2	127814953	127814953	T	C	exonic	Bub1	.	nonsynonymous SNV	Bub1:NM_001113179:exon12:c.A1258G:p.K420E,Bub1:NM_009772:exon12:c.A1255G:p.K419E	.	het	.	2	127814953	127814953	T	C	het	262.64	15
2	127814958	127814958	G	A	exonic	Bub1	.	nonsynonymous SNV	Bub1:NM_001113179:exon12:c.C1253T:p.T418I,Bub1:NM_009772:exon12:c.C1250T:p.T417I	.	het	.	2	127814958	127814958	G	A	het	304.64	16
2	127814961	127814961	T	C	exonic	Bub1	.	nonsynonymous SNV	Bub1:NM_001113179:exon12:c.A1250G:p.E417G,Bub1:NM_009772:exon12:c.A1247G:p.E416G	.	het	.	2	127814961	127814961	T	C	het	304.64	16
2	128648353	128648353	T	C	exonic	Anapc1	.	nonsynonymous SNV	Anapc1:NM_008569:exon26:c.A3158G:p.Q1053R	.	het	.	2	128648353	128648353	T	C	het	154.64	21
2	129014641	129014641	A	T	exonic	Zc3h6	.	nonsynonymous SNV	Zc3h6:NM_178404:exon10:c.A1640T:p.H547L	.	het	.	2	129014641	129014641	A	T	het	112.64	20
2	129014644	129014644	T	G	exonic	Zc3h6	.	nonsynonymous SNV	Zc3h6:NM_178404:exon10:c.C1643G:p.S548C	.	het	.	2	129014644	129014644	T	G	het	112.64	20
2	129113551	129113551	A	G	exonic	Polr1b	.	nonsynonymous SNV	Polr1b:NM_009086:exon9:c.A1381G:p.N461D	.	het	.	2	129113551	129113551	A	G	het	40.64	13
2	130614258	130614258	G	A	exonic	Fastkd5	.	nonsynonymous SNV	Fastkd5:NM_001377124:exon2:c.C2276T:p.T759I,Fastkd5:NM_001377125:exon2:c.C2276T:p.T759I,Fastkd5:NM_001146084:exon3:c.C2276T:p.T759I,Fastkd5:NM_198176:exon3:c.C2276T:p.T759I	.	het	.	2	130614258	130614258	G	A	het	97.64	10
2	130614259	130614259	C	A	exonic	Fastkd5	.	nonsynonymous SNV	Fastkd5:NM_001377124:exon2:c.A2275T:p.T759S,Fastkd5:NM_001377125:exon2:c.A2275T:p.T759S,Fastkd5:NM_001146084:exon3:c.A2275T:p.T759S,Fastkd5:NM_198176:exon3:c.A2275T:p.T759S	.	het	.	2	130614259	130614259	C	A	het	97.64	10
2	130614300	130614300	T	A	exonic	Fastkd5	.	nonsynonymous SNV	Fastkd5:NM_001377124:exon2:c.C2234T:p.T745I,Fastkd5:NM_001377125:exon2:c.C2234T:p.T745I,Fastkd5:NM_001146084:exon3:c.C2234T:p.T745I,Fastkd5:NM_198176:exon3:c.C2234T:p.T745I	.	het	.	2	130614300	130614300	T	A	het	136.64	12
2	130614302	130614302	G	A	exonic	Fastkd5	.	nonsynonymous SNV	Fastkd5:NM_001377124:exon2:c.A2232T:p.R744S,Fastkd5:NM_001377125:exon2:c.A2232T:p.R744S,Fastkd5:NM_001146084:exon3:c.A2232T:p.R744S,Fastkd5:NM_198176:exon3:c.A2232T:p.R744S	.	het	.	2	130614302	130614302	G	A	het	136.64	12
2	130637184	130637184	C	T	exonic	Lzts3	.	nonsynonymous SNV	Lzts3:NM_001291027:exon3:c.G308A:p.S103N,Lzts3:NM_197945:exon3:c.G308A:p.S103N	.	het	.	2	130637184	130637184	C	T	het	36.64	10
2	130637239	130637239	C	T	exonic	Lzts3	.	nonsynonymous SNV	Lzts3:NM_001291027:exon3:c.G253A:p.V85M,Lzts3:NM_197945:exon3:c.G253A:p.V85M	.	het	.	2	130637239	130637239	C	T	het	97.64	10
2	130637242	130637242	G	A	exonic	Lzts3	.	nonsynonymous SNV	Lzts3:NM_001291027:exon3:c.A250T:p.S84C,Lzts3:NM_197945:exon3:c.A250T:p.S84C	.	het	.	2	130637242	130637242	G	A	het	97.64	10
2	130663428	130663428	0	G	exonic	Ddrgk1	.	nonsynonymous SNV	Ddrgk1:NM_029832:exon2:c.G218C:p.S73T	.	het	.	2	130663428	130663428	-	G	het	298.60	18
2	130820480	130820480	0	A	exonic	4930402H24Rik	.	nonsynonymous SNV	4930402H24Rik:NM_029432:exon3:c.A272T:p.E91V	.	het	.	2	130820480	130820480	-	A	het	157.60	20
2	130820498	130820498	T	A	exonic	4930402H24Rik	.	nonsynonymous SNV	4930402H24Rik:NM_029432:exon3:c.A254T:p.K85I	.	het	.	2	130820498	130820498	T	A	het	34.64	16
2	130820517	130820517	G	A	exonic	4930402H24Rik	.	nonsynonymous SNV	4930402H24Rik:NM_029432:exon3:c.A235T:p.N79Y	.	het	.	2	130820517	130820517	G	A	het	20.64	14
2	130820523	130820523	T	C	exonic	4930402H24Rik	.	nonsynonymous SNV	4930402H24Rik:NM_029432:exon3:c.A229G:p.S77G	.	het	.	2	130820523	130820523	T	C	het	20.64	14
2	130957963	130957963	A	G	exonic	Atrn	.	nonsynonymous SNV	Atrn:NM_009730:exon8:c.T1259G:p.L420R	.	het	.	2	130957963	130957963	A	G	het	52.64	25
2	131191911	131191911	T	C	exonic	Cdc25b	.	nonsynonymous SNV	Cdc25b:NM_023117:exon7:c.G678C:p.R226S	.	het	.	2	131191911	131191911	T	C	het	237.64	19
2	132870665	132870665	T	C	exonic	Lrrn4	.	nonsynonymous SNV	Lrrn4:NM_177303:exon5:c.C1237G:p.P413A	.	het	.	2	132870665	132870665	T	C	het	40.64	14
2	132870899	132870899	C	T	exonic	Lrrn4	.	nonsynonymous SNV	Lrrn4:NM_177303:exon5:c.G1003A:p.A335T	.	het	.	2	132870899	132870899	C	T	het	28.64	18
2	132870901	132870901	G	C	exonic	Lrrn4	.	nonsynonymous SNV	Lrrn4:NM_177303:exon5:c.C1001G:p.A334G	.	het	.	2	132870901	132870901	G	C	het	31.64	17
2	135344267	135344267	C	T	exonic	Plcb1	.	nonsynonymous SNV	Plcb1:NM_001145830:exon20:c.C2153T:p.S718F,Plcb1:NM_019677:exon20:c.C2153T:p.S718F	.	het	.	2	135344267	135344267	C	T	het	88.64	28
2	135345092	135345092	A	T	exonic	Plcb1	.	nonsynonymous SNV	Plcb1:NM_001145830:exon21:c.C2278T:p.R760W,Plcb1:NM_019677:exon21:c.C2278T:p.R760W	.	het	.	2	135345092	135345092	A	T	het	143.64	30
2	139910640	139910640	G	A	exonic	Tasp1	.	nonsynonymous SNV	Tasp1:NM_001159640:exon11:c.G878T:p.C293F,Tasp1:NM_175225:exon11:c.G878T:p.C293F	.	het	.	2	139910640	139910640	G	A	het	192.64	20
2	140158576	140158576	G	A	exonic	Esf1	.	nonsynonymous SNV	Esf1:NM_001081090:exon6:c.C1289T:p.A430V	.	het	.	2	140158576	140158576	G	A	het	40.64	14
2	140285273	140285273	A	G	exonic	Sel1l2	.	nonsynonymous SNV	Sel1l2:NM_001033296:exon4:c.A317C:p.E106A	.	het	.	2	140285273	140285273	A	G	het	134.64	11
2	143801157	143801157	C	T	exonic	Pcsk2	.	nonsynonymous SNV	Pcsk2:NM_008792:exon11:c.G1353T:p.M451I	.	het	.	2	143801157	143801157	C	T	het	23.64	14
2	144252512	144252512	C	A	exonic	Snx5	.	nonsynonymous SNV	Snx5:NM_024225:exon12:c.G1097T:p.R366L,Snx5:NM_001199188:exon13:c.G1097T:p.R366L	.	het	.	2	144252512	144252512	C	A	het	274.64	11
2	144252515	144252515	T	C	exonic	Snx5	.	nonsynonymous SNV	Snx5:NM_024225:exon12:c.A1094G:p.K365R,Snx5:NM_001199188:exon13:c.A1094G:p.K365R	.	het	.	2	144252515	144252515	T	C	het	274.64	11
2	144393716	144393716	T	G	exonic	Kat14	.	nonsynonymous SNV	Kat14:NM_001166640:exon6:c.T711G:p.F237L,Kat14:NM_181417:exon6:c.T1095G:p.F365L	.	het	.	2	144393716	144393716	T	G	het	52.64	10
2	144393719	144393719	A	G	exonic	Kat14	.	nonsynonymous SNV	Kat14:NM_001166640:exon6:c.T714G:p.H238Q,Kat14:NM_181417:exon6:c.T1098G:p.H366Q	.	het	.	2	144393719	144393719	A	G	het	52.64	10
2	144394113	144394113	A	G	exonic	Kat14	.	nonsynonymous SNV	Kat14:NM_001166640:exon7:c.A1013G:p.K338R,Kat14:NM_181417:exon7:c.A1397G:p.K466R	.	het	.	2	144394113	144394113	A	G	het	34.64	14
2	144394145	144394145	T	C	exonic	Kat14	.	nonsynonymous SNV	Kat14:NM_001166640:exon7:c.G1045C:p.G349R,Kat14:NM_181417:exon7:c.G1429C:p.G477R	.	het	.	2	144394145	144394145	T	C	het	307.64	15
2	144394154	144394154	G	C	exonic	Kat14	.	nonsynonymous SNV	Kat14:NM_001166640:exon7:c.G1054C:p.A352P,Kat14:NM_181417:exon7:c.G1438C:p.A480P	.	het	.	2	144394154	144394154	G	C	het	87.64	12
2	145245016	145245016	C	T	exonic	Slc24a3	.	nonsynonymous SNV	Slc24a3:NM_001356497:exon2:c.G195T:p.K65N,Slc24a3:NM_053195:exon2:c.G45T:p.K15N	.	het	.	2	145245016	145245016	C	T	het	353.64	23
2	145245034	145245034	T	A	exonic	Slc24a3	.	nonsynonymous SNV	Slc24a3:NM_001356497:exon2:c.T213A:p.D71E,Slc24a3:NM_053195:exon2:c.T63A:p.D21E	.	het	.	2	145245034	145245034	T	A	het	130.64	18
2	145245049	145245049	G	T	exonic	Slc24a3	.	nonsynonymous SNV	Slc24a3:NM_001356497:exon2:c.A228T:p.E76D,Slc24a3:NM_053195:exon2:c.A78T:p.E26D	.	het	.	2	145245049	145245049	G	T	het	21.64	16
2	146357986	146357986	C	T	exonic	Ralgapa2	.	nonsynonymous SNV	Ralgapa2:NM_001033348:exon26:c.G3496A:p.D1166N	.	het	.	2	146357986	146357986	C	T	het	77.64	14
2	148683818	148683818	T	C	exonic	Gzf1	.	nonsynonymous SNV	Gzf1:NM_001355689:exon2:c.G208C:p.A70P,Gzf1:NM_028986:exon2:c.G208C:p.A70P	.	het	.	2	148683818	148683818	T	C	het	82.64	12
2	148683825	148683825	T	C	exonic	Gzf1	.	nonsynonymous SNV	Gzf1:NM_001355689:exon2:c.G215C:p.G72A,Gzf1:NM_028986:exon2:c.G215C:p.G72A	.	het	.	2	148683825	148683825	T	C	het	46.64	12
2	148683858	148683858	T	C	exonic	Gzf1	.	nonsynonymous SNV	Gzf1:NM_001355689:exon2:c.A248C:p.Q83P,Gzf1:NM_028986:exon2:c.A248C:p.Q83P	.	het	.	2	148683858	148683858	T	C	het	574.64	46
2	148684085	148684085	C	A	exonic	Gzf1	.	nonsynonymous SNV	Gzf1:NM_001355689:exon2:c.G475A:p.V159M,Gzf1:NM_028986:exon2:c.G475A:p.V159M	.	het	.	2	148684085	148684085	C	A	het	46.64	46
2	148684133	148684133	C	G	exonic	Gzf1	.	nonsynonymous SNV	Gzf1:NM_001355689:exon2:c.A523G:p.N175D,Gzf1:NM_028986:exon2:c.A523G:p.N175D	.	het	.	2	148684133	148684133	C	G	het	224.64	42
2	148684134	148684134	A	G	exonic	Gzf1	.	nonsynonymous SNV	Gzf1:NM_001355689:exon2:c.A524G:p.N175S,Gzf1:NM_028986:exon2:c.A524G:p.N175S	.	het	.	2	148684134	148684134	A	G	het	224.64	42
2	148690715	148690715	A	G	exonic	Gzf1	.	nonsynonymous SNV	Gzf1:NM_001355689:exon6:c.T1788G:p.D596E,Gzf1:NM_028986:exon6:c.T1788G:p.D596E	.	het	.	2	148690715	148690715	A	G	het	84.64	10
2	148782192	148782192	C	T	exonic	Cstdc1	.	nonsynonymous SNV	Cstdc1:NM_030135:exon1:c.A85T:p.T29S	.	het	.	2	148782192	148782192	C	T	het	211.64	47
2	148782208	148782208	T	G	exonic	Cstdc1	.	nonsynonymous SNV	Cstdc1:NM_030135:exon1:c.A101G:p.Y34C	.	het	.	2	148782208	148782208	T	G	het	244.64	36
2	148782258	148782258	C	T	exonic	Cstdc1	.	nonsynonymous SNV	Cstdc1:NM_030135:exon1:c.C151T:p.P51S	.	het	.	2	148782258	148782258	C	T	het	418.64	23
2	148782259	148782259	G	A	exonic	Cstdc1	.	nonsynonymous SNV	Cstdc1:NM_030135:exon1:c.C152A:p.P51Q	.	het	.	2	148782259	148782259	G	A	het	418.64	23
2	148800098	148800098	C	G	exonic	Cst8	.	nonsynonymous SNV	Cst8:NM_009978:exon2:c.T114G:p.I38M	.	het	.	2	148800098	148800098	C	G	het	76.64	17
2	148800101	148800101	C	A	exonic	Cst8	.	nonsynonymous SNV	Cst8:NM_009978:exon2:c.T117A:p.N39K	.	het	.	2	148800101	148800101	C	A	het	76.64	17
2	148800138	148800138	G	T	exonic	Cst8	.	nonsynonymous SNV	Cst8:NM_009978:exon2:c.G154T:p.A52S	.	het	.	2	148800138	148800138	G	T	het	33.64	23
2	148805441	148805441	A	C	exonic	Cst8	.	nonsynonymous SNV	Cst8:NM_009978:exon4:c.G370C:p.G124R	.	het	.	2	148805441	148805441	A	C	het	191.64	24
2	148835251	148835251	C	A	exonic	Cst9	.	nonsynonymous SNV	Cst9:NM_009979:exon1:c.T41A:p.M14K	.	het	.	2	148835251	148835251	C	A	het	112.64	20
2	148835320	148835320	G	T	exonic	Cst9	.	nonsynonymous SNV	Cst9:NM_009979:exon1:c.G110T:p.R37I	.	het	.	2	148835320	148835320	G	T	het	124.64	16
2	148835321	148835321	T	C	exonic	Cst9	.	nonsynonymous SNV	Cst9:NM_009979:exon1:c.A111C:p.R37S	.	het	.	2	148835321	148835321	T	C	het	121.64	17
2	148835322	148835322	G	A	exonic	Cst9	.	nonsynonymous SNV	Cst9:NM_009979:exon1:c.T112A:p.S38T	.	het	.	2	148835322	148835322	G	A	het	121.64	17
2	148835328	148835328	G	A	exonic	Cst9	.	nonsynonymous SNV	Cst9:NM_009979:exon1:c.C118A:p.H40N	.	het	.	2	148835328	148835328	G	A	het	121.64	17
2	148835334	148835334	A	G	exonic	Cst9	.	nonsynonymous SNV	Cst9:NM_009979:exon1:c.A124G:p.I42V	.	het	.	2	148835334	148835334	A	G	het	118.64	18
2	150191858	150191858	G	C	exonic	Gm14139	.	nonsynonymous SNV	Gm14139:NM_001145863:exon4:c.A194C:p.H65P	.	het	.	2	150191858	150191858	G	C	het	36.64	11
2	150191960	150191960	G	A	exonic	Gm14139	.	nonsynonymous SNV	Gm14139:NM_001145863:exon4:c.C296A:p.A99E	.	het	.	2	150191960	150191960	G	A	het	49.64	11
2	150192060	150192060	G	C	exonic	Gm14139	.	nonsynonymous SNV	Gm14139:NM_001145863:exon4:c.A396C:p.Q132H	.	het	.	2	150192060	150192060	G	C	het	40.64	11
2	150268338	150268338	T	C	exonic	Gm14124	.	nonsynonymous SNV	Gm14124:NM_001142410:exon4:c.G947C:p.R316T	.	het	.	2	150268338	150268338	T	C	het	44.64	10
2	150268419	150268419	A	G	exonic	Gm14124	.	nonsynonymous SNV	Gm14124:NM_001142410:exon4:c.A1028G:p.Q343R	.	het	.	2	150268419	150268419	A	G	het	142.64	10
2	150269018	150269018	C	G	exonic	Gm14124	.	nonsynonymous SNV	Gm14124:NM_001142410:exon4:c.A1627G:p.R543G	.	het	.	2	150269018	150269018	C	G	het	73.64	18
2	150269020	150269020	C	T	exonic	Gm14124	.	nonsynonymous SNV	Gm14124:NM_001142410:exon4:c.A1629T:p.R543S	.	het	.	2	150269020	150269020	C	T	het	73.64	18
2	150269180	150269180	T	G	exonic	Gm14124	.	nonsynonymous SNV	Gm14124:NM_001142410:exon4:c.C1789G:p.H597D	.	het	.	2	150269180	150269180	T	G	het	42.64	14
2	150269222	150269222	G	A	exonic	Gm14124	.	nonsynonymous SNV	Gm14124:NM_001142410:exon4:c.C1831A:p.Q611K	.	het	.	2	150269222	150269222	G	A	het	76.64	13
2	150917908	150917908	T	C	exonic	Gins1	.	nonsynonymous SNV	Gins1:NM_001163476:exon4:c.A279C:p.E93D,Gins1:NM_027014:exon4:c.A279C:p.E93D	.	het	.	2	150917908	150917908	T	C	het	94.64	53
2	150917915	150917915	C	G	exonic	Gins1	.	nonsynonymous SNV	Gins1:NM_001163476:exon4:c.A286G:p.S96G,Gins1:NM_027014:exon4:c.A286G:p.S96G	.	het	.	2	150917915	150917915	C	G	het	73.64	48
2	150917945	150917945	A	C	exonic	Gins1	.	nonsynonymous SNV	Gins1:NM_001163476:exon4:c.A316C:p.M106L,Gins1:NM_027014:exon4:c.A316C:p.M106L	.	het	.	2	150917945	150917945	A	C	het	54.64	54
2	150917946	150917946	G	A	exonic	Gins1	.	nonsynonymous SNV	Gins1:NM_001163476:exon4:c.T317A:p.M106K,Gins1:NM_027014:exon4:c.T317A:p.M106K	.	het	.	2	150917946	150917946	G	A	het	54.64	54
2	151030652	151030652	T	C	exonic	Nanp	.	nonsynonymous SNV	Nanp:NM_026086:exon2:c.A355G:p.T119A	.	het	.	2	151030652	151030652	T	C	het	92.64	31
2	151030656	151030656	T	A	exonic	Nanp	.	nonsynonymous SNV	Nanp:NM_026086:exon2:c.G351T:p.M117I	.	het	.	2	151030656	151030656	T	A	het	127.64	30
2	151030684	151030684	T	C	exonic	Nanp	.	nonsynonymous SNV	Nanp:NM_026086:exon2:c.T323G:p.M108R	.	het	.	2	151030684	151030684	T	C	het	46.64	27
2	151030899	151030899	A	G	exonic	Nanp	.	nonsynonymous SNV	Nanp:NM_026086:exon2:c.G108C:p.Q36H	.	het	.	2	151030899	151030899	A	G	het	121.64	26
2	151030900	151030900	T	G	exonic	Nanp	.	nonsynonymous SNV	Nanp:NM_026086:exon2:c.A107C:p.Q36P	.	het	.	2	151030900	151030900	T	G	het	121.64	26
2	152258722	152258722	C	G	exonic	Csnk2a1	.	nonsynonymous SNV	Csnk2a1:NM_007788:exon6:c.A413G:p.Y138C	.	het	.	2	152258722	152258722	C	G	het	133.64	13
2	152258728	152258728	T	A	exonic	Csnk2a1	.	nonsynonymous SNV	Csnk2a1:NM_007788:exon6:c.T419A:p.I140N	.	het	.	2	152258728	152258728	T	A	het	133.64	13
2	152338566	152338566	T	C	exonic	Trib3	.	nonsynonymous SNV	Trib3:NM_175093:exon4:c.T706G:p.S236A	.	het	.	2	152338566	152338566	T	C	het	52.64	10
2	152686298	152686298	G	A	exonic	H13	.	nonsynonymous SNV	H13:NM_001159552:exon4:c.G566A:p.G189D	.	het	.	2	152686298	152686298	G	A	het	175.64	29
2	152686314	152686314	C	T	exonic	H13	.	nonsynonymous SNV	H13:NM_001159552:exon4:c.G582T:p.W194C	.	het	.	2	152686314	152686314	C	T	het	152.64	18
2	152983116	152983116	T	C	exonic	Ttll9	.	nonsynonymous SNV	Ttll9:NM_001355717:exon3:c.A214C:p.T72P,Ttll9:NM_001083618:exon4:c.A214C:p.T72P,Ttll9:NM_001355719:exon4:c.A214C:p.T72P,Ttll9:NM_029064:exon4:c.A214C:p.T72P	.	het	.	2	152983116	152983116	T	C	het	739.64	41
2	153202346	153202346	T	C	exonic	Tm9sf4	.	nonsynonymous SNV	Tm9sf4:NM_133847:exon15:c.T1517C:p.M506T	.	het	.	2	153202346	153202346	T	C	het	664.64	46
2	153202351	153202351	A	T	exonic	Tm9sf4	.	nonsynonymous SNV	Tm9sf4:NM_133847:exon15:c.G1522T:p.G508W	.	het	.	2	153202351	153202351	A	T	het	45.64	29
2	153202363	153202363	A	G	exonic	Tm9sf4	.	nonsynonymous SNV	Tm9sf4:NM_133847:exon15:c.T1534G:p.F512V	.	het	.	2	153202363	153202363	A	G	het	58.64	38
2	153202382	153202382	T	C	exonic	Tm9sf4	.	nonsynonymous SNV	Tm9sf4:NM_133847:exon15:c.A1553C:p.E518A	.	het	.	2	153202382	153202382	T	C	het	245.64	48
2	153470692	153470692	T	C	exonic	Nol4l	.	nonsynonymous SNV	Nol4l:NM_001134300:exon4:c.A695G:p.E232G	.	het	.	2	153470692	153470692	T	C	het	28.64	17
2	153470779	153470779	G	A	exonic	Nol4l	.	nonsynonymous SNV	Nol4l:NM_001134300:exon4:c.C608T:p.P203L	.	het	.	2	153470779	153470779	G	A	het	46.64	12
2	153470780	153470780	G	C	exonic	Nol4l	.	nonsynonymous SNV	Nol4l:NM_001134300:exon4:c.C607G:p.P203A	.	het	.	2	153470780	153470780	G	C	het	46.64	12
2	153470783	153470783	T	C	exonic	Nol4l	.	nonsynonymous SNV	Nol4l:NM_001134300:exon4:c.T604G:p.S202A	.	het	.	2	153470783	153470783	T	C	het	46.64	12
2	153470788	153470788	A	T	exonic	Nol4l	.	nonsynonymous SNV	Nol4l:NM_001134300:exon4:c.C599A:p.P200H	.	het	.	2	153470788	153470788	A	T	het	46.64	12
2	153865353	153865353	T	C	exonic	Sun5	.	nonsynonymous SNV	Sun5:NM_029599:exon7:c.T404G:p.M135R,Sun5:NM_001305048:exon8:c.T479G:p.M160R	.	het	.	2	153865353	153865353	T	C	het	59.64	23
2	153865355	153865355	C	T	exonic	Sun5	.	nonsynonymous SNV	Sun5:NM_029599:exon7:c.C402A:p.S134R,Sun5:NM_001305048:exon8:c.C477A:p.S159R	.	het	.	2	153865355	153865355	C	T	het	59.64	23
2	154266843	154266843	A	G	exonic	Bpifb9a	.	nonsynonymous SNV	Bpifb9a:NM_175167:exon9:c.C1263G:p.N421K	.	het	.	2	154266843	154266843	A	G	het	37.64	11
2	155212398	155212398	C	T	exonic	Itch	.	nonsynonymous SNV	Itch:NM_008395:exon21:c.G2161T:p.G721C,Itch:NM_001243712:exon22:c.G2161T:p.G721C	.	het	.	2	155212398	155212398	C	T	het	166.64	10
2	155212426	155212426	C	G	exonic	Itch	.	nonsynonymous SNV	Itch:NM_008395:exon21:c.A2189G:p.Y730C,Itch:NM_001243712:exon22:c.A2189G:p.Y730C	.	het	.	2	155212426	155212426	C	G	het	40.64	14
2	155213017	155213017	A	T	exonic	Itch	.	nonsynonymous SNV	Itch:NM_008395:exon22:c.A2240T:p.Q747L,Itch:NM_001243712:exon23:c.A2240T:p.Q747L	.	het	.	2	155213017	155213017	A	T	het	60.64	17
2	155614195	155614195	T	G	exonic	Myh7b	.	nonsynonymous SNV	Myh7b:NM_001085378:exon5:c.A499G:p.N167D	.	het	.	2	155614195	155614195	T	G	het	136.64	12
2	155975777	155975777	0	C	exonic	Cep250	.	nonsynonymous SNV	Cep250:NM_001129999:exon16:c.T2264C:p.L755P,Cep250:NM_001130000:exon16:c.T2267C:p.L756P,Cep250:NM_008383:exon17:c.T2204C:p.L735P,Cep250:NM_177217:exon17:c.T2204C:p.L735P	.	het	.	2	155975777	155975777	-	C	het	447.60	19
2	155975779	155975779	G	A	exonic	Cep250	.	nonsynonymous SNV	Cep250:NM_001129999:exon16:c.G2266A:p.V756I,Cep250:NM_001130000:exon16:c.G2269A:p.V757I,Cep250:NM_008383:exon17:c.G2206A:p.V736I,Cep250:NM_177217:exon17:c.G2206A:p.V736I	.	het	.	2	155975779	155975779	G	A	het	676.64	19
2	155975790	155975790	C	T	exonic	Cep250	.	nonsynonymous SNV	Cep250:NM_001129999:exon16:c.G2277T:p.R759S,Cep250:NM_001130000:exon16:c.G2280T:p.R760S,Cep250:NM_008383:exon17:c.G2217T:p.R739S,Cep250:NM_177217:exon17:c.G2217T:p.R739S	.	het	.	2	155975790	155975790	C	T	het	425.64	19
2	155975809	155975809	G	A	exonic	Cep250	.	nonsynonymous SNV	Cep250:NM_001129999:exon16:c.C2296A:p.L766M,Cep250:NM_001130000:exon16:c.C2299A:p.L767M,Cep250:NM_008383:exon17:c.C2236A:p.L746M,Cep250:NM_177217:exon17:c.C2236A:p.L746M	.	het	.	2	155975809	155975809	G	A	het	56.64	21
2	155975815	155975815	C	T	exonic	Cep250	.	nonsynonymous SNV	Cep250:NM_001129999:exon16:c.G2302T:p.A768S,Cep250:NM_001130000:exon16:c.G2305T:p.A769S,Cep250:NM_008383:exon17:c.G2242T:p.A748S,Cep250:NM_177217:exon17:c.G2242T:p.A748S	.	het	.	2	155975815	155975815	C	T	het	360.64	25
2	155975818	155975818	G	C	exonic	Cep250	.	nonsynonymous SNV	Cep250:NM_001129999:exon16:c.G2305C:p.V769L,Cep250:NM_001130000:exon16:c.G2308C:p.V770L,Cep250:NM_008383:exon17:c.G2245C:p.V749L,Cep250:NM_177217:exon17:c.G2245C:p.V749L	.	het	.	2	155975818	155975818	G	C	het	55.64	21
2	156008183	156008183	T	C	exonic	Ergic3	.	nonsynonymous SNV	Ergic3:NM_001356413:exon1:c.A43C:p.K15Q,Ergic3:NM_001356414:exon1:c.A43C:p.K15Q,Ergic3:NM_025516:exon1:c.A43C:p.K15Q	.	het	.	2	156008183	156008183	T	C	het	31.64	14
2	156045541	156045541	T	G	exonic	Fer1l4	.	nonsynonymous SNV	Fer1l4:NM_001136556:exon15:c.G1734C:p.K578N	.	het	.	2	156045541	156045541	T	G	het	242.64	16
2	156045547	156045547	G	A	exonic	Fer1l4	.	nonsynonymous SNV	Fer1l4:NM_001136556:exon15:c.A1728T:p.K576N	.	het	.	2	156045547	156045547	G	A	het	208.64	15
2	156045563	156045563	C	T	exonic	Fer1l4	.	nonsynonymous SNV	Fer1l4:NM_001136556:exon15:c.T1712A:p.L571H	.	het	.	2	156045563	156045563	C	T	het	184.64	11
2	156045770	156045770	A	G	exonic	Fer1l4	.	nonsynonymous SNV	Fer1l4:NM_001136556:exon15:c.A1505C:p.N502T	.	het	.	2	156045770	156045770	A	G	het	223.64	13
2	156045771	156045771	G	A	exonic	Fer1l4	.	nonsynonymous SNV	Fer1l4:NM_001136556:exon15:c.A1504T:p.N502Y	.	het	.	2	156045771	156045771	G	A	het	223.64	13
2	156045773	156045773	A	G	exonic	Fer1l4	.	nonsynonymous SNV	Fer1l4:NM_001136556:exon15:c.T1502C:p.F501S	.	het	.	2	156045773	156045773	A	G	het	223.64	13
2	156045776	156045776	T	G	exonic	Fer1l4	.	nonsynonymous SNV	Fer1l4:NM_001136556:exon15:c.G1499C:p.G500A	.	het	.	2	156045776	156045776	T	G	het	229.64	11
2	156048231	156048231	A	G	exonic	Fer1l4	.	nonsynonymous SNV	Fer1l4:NM_001136556:exon9:c.T773C:p.V258A	.	het	.	2	156048231	156048231	A	G	het	181.64	12
2	156048253	156048253	T	C	exonic	Fer1l4	.	nonsynonymous SNV	Fer1l4:NM_001136556:exon9:c.C751G:p.R251G	.	het	.	2	156048253	156048253	T	C	het	184.64	11
2	156048890	156048890	C	T	exonic	Fer1l4	.	nonsynonymous SNV	Fer1l4:NM_001136556:exon7:c.T607A:p.F203I	.	het	.	2	156048890	156048890	C	T	het	97.64	10
2	156127674	156127674	T	A	exonic	Nfs1	.	nonsynonymous SNV	Nfs1:NM_010911:exon9:c.A1052T:p.H351L	.	het	.	2	156127674	156127674	T	A	het	230.64	11
2	156254233	156254233	G	C	exonic	Phf20	.	nonsynonymous SNV	Phf20:NM_172674:exon4:c.A263C:p.Q88P	.	het	.	2	156254233	156254233	G	C	het	175.64	14
2	156254245	156254245	A	G	exonic	Phf20	.	nonsynonymous SNV	Phf20:NM_172674:exon4:c.A275G:p.Q92R	.	het	.	2	156254245	156254245	A	G	het	175.64	14
2	156254306	156254306	T	C	exonic	Phf20	.	nonsynonymous SNV	Phf20:NM_172674:exon4:c.G336C:p.K112N	.	het	.	2	156254306	156254306	T	C	het	313.64	13
2	156254308	156254308	T	C	exonic	Phf20	.	nonsynonymous SNV	Phf20:NM_172674:exon4:c.A338C:p.D113A	.	het	.	2	156254308	156254308	T	C	het	313.64	13
2	156701570	156701570	G	A	exonic	Dlgap4	.	nonsynonymous SNV	Dlgap4:NM_001277186:exon3:c.C892A:p.L298I,Dlgap4:NM_001277187:exon3:c.C892A:p.L298I,Dlgap4:NM_146128:exon3:c.C892A:p.L298I	.	het	.	2	156701570	156701570	G	A	het	52.64	10
2	156701579	156701579	C	T	exonic	Dlgap4	.	nonsynonymous SNV	Dlgap4:NM_001277186:exon3:c.G901T:p.A301S,Dlgap4:NM_001277187:exon3:c.G901T:p.A301S,Dlgap4:NM_146128:exon3:c.G901T:p.A301S	.	het	.	2	156701579	156701579	C	T	het	49.64	11
2	156701598	156701598	C	T	exonic	Dlgap4	.	nonsynonymous SNV	Dlgap4:NM_001277186:exon3:c.A920T:p.K307M,Dlgap4:NM_001277187:exon3:c.A920T:p.K307M,Dlgap4:NM_146128:exon3:c.A920T:p.K307M	.	het	.	2	156701598	156701598	C	T	het	233.64	11
2	157005217	157005217	A	G	exonic	Dsn1	.	nonsynonymous SNV	Dsn1:NM_025853:exon3:c.A300C:p.K100N	.	het	.	2	157005217	157005217	A	G	het	37.64	15
2	157005221	157005221	C	T	exonic	Dsn1	.	nonsynonymous SNV	Dsn1:NM_025853:exon3:c.T296A:p.M99K	.	het	.	2	157005221	157005221	C	T	het	37.64	15
2	157040698	157040698	G	A	exonic	Soga1	.	nonsynonymous SNV	Soga1:NM_001164663:exon5:c.A1433T:p.D478V	.	het	.	2	157040698	157040698	G	A	het	106.64	11
2	157222816	157222816	C	T	exonic	Mroh8	.	nonsynonymous SNV	Mroh8:NM_001039557:exon17:c.T2339A:p.F780Y	.	het	.	2	157222816	157222816	C	T	het	268.64	13
2	157222817	157222817	A	G	exonic	Mroh8	.	nonsynonymous SNV	Mroh8:NM_001039557:exon17:c.T2338C:p.F780L	.	het	.	2	157222817	157222817	A	G	het	268.64	13
2	158186178	158186178	A	G	exonic	D630003M21Rik	.	nonsynonymous SNV	D630003M21Rik:NM_001131021:exon15:c.A3301C:p.I1101L	.	het	.	2	158186178	158186178	A	G	het	109.64	19
2	158186180	158186180	G	A	exonic	D630003M21Rik	.	nonsynonymous SNV	D630003M21Rik:NM_001131021:exon15:c.C3299T:p.S1100F	.	het	.	2	158186180	158186180	G	A	het	112.64	18
2	160965707	160965707	A	G	exonic	Chd6	.	nonsynonymous SNV	Chd6:NM_173368:exon31:c.A5586C:p.L1862F	.	het	.	2	160965707	160965707	A	G	het	151.64	19
2	160965736	160965736	G	A	exonic	Chd6	.	nonsynonymous SNV	Chd6:NM_173368:exon31:c.A5557T:p.N1853Y	.	het	.	2	160965736	160965736	G	A	het	178.64	13
2	160965747	160965747	T	C	exonic	Chd6	.	nonsynonymous SNV	Chd6:NM_173368:exon31:c.A5546G:p.D1849G	.	het	.	2	160965747	160965747	T	C	het	160.64	19
2	160965748	160965748	G	T	exonic	Chd6	.	nonsynonymous SNV	Chd6:NM_173368:exon31:c.G5545A:p.D1849N	.	het	.	2	160965748	160965748	G	T	het	160.64	19
2	160965800	160965800	G	T	exonic	Chd6	.	nonsynonymous SNV	Chd6:NM_173368:exon31:c.T5493A:p.S1831R	.	het	.	2	160965800	160965800	G	T	het	151.64	22
2	160965802	160965802	T	C	exonic	Chd6	.	nonsynonymous SNV	Chd6:NM_173368:exon31:c.A5491G:p.S1831G	.	het	.	2	160965802	160965802	T	C	het	151.64	22
2	161014128	161014128	A	T	exonic	Chd6	.	nonsynonymous SNV	Chd6:NM_173368:exon15:c.T2210A:p.M737K	.	het	.	2	161014128	161014128	A	T	het	97.64	10
2	163469574	163469574	T	C	exonic	Fitm2	.	nonsynonymous SNV	Fitm2:NM_173397:exon2:c.A718G:p.K240E	.	het	.	2	163469574	163469574	T	C	het	133.64	43
2	163469634	163469634	A	G	exonic	Fitm2	.	nonsynonymous SNV	Fitm2:NM_173397:exon2:c.G658C:p.V220L	.	het	.	2	163469634	163469634	A	G	het	859.64	41
2	163469636	163469636	G	A	exonic	Fitm2	.	nonsynonymous SNV	Fitm2:NM_173397:exon2:c.A656T:p.K219I	.	het	.	2	163469636	163469636	G	A	het	893.64	41
2	163469651	163469651	A	G	exonic	Fitm2	.	nonsynonymous SNV	Fitm2:NM_173397:exon2:c.A641C:p.H214P	.	het	.	2	163469651	163469651	A	G	het	322.64	33
2	163469657	163469657	A	G	exonic	Fitm2	.	nonsynonymous SNV	Fitm2:NM_173397:exon2:c.A635C:p.Y212S	.	het	.	2	163469657	163469657	A	G	het	280.64	32
2	163750060	163750060	T	C	exonic	Ada	.	nonsynonymous SNV	Ada:NM_001272052:exon1:c.A32G:p.K11R,Ada:NM_007398:exon1:c.A32G:p.K11R	.	het	.	2	163750060	163750060	T	C	het	187.64	10
2	163918665	163918665	C	A	exonic	Rims4	.	nonsynonymous SNV	Rims4:NM_001376942:exon1:c.C19T:p.R7C,Rims4:NM_183023:exon1:c.C19T:p.R7C	.	het	.	2	163918665	163918665	C	A	het	121.64	10
2	164151758	164151758	A	G	exonic	Stk4	.	nonsynonymous SNV	Stk4:NM_021420:exon11:c.A1391G:p.Q464R	.	het	.	2	164151758	164151758	A	G	het	70.64	12
2	164393377	164393377	G	A	exonic	Matn4	.	nonsynonymous SNV	Matn4:NM_001252563:exon8:c.C1274T:p.T425I,Matn4:NM_013592:exon8:c.C1274T:p.T425I	.	het	.	2	164393377	164393377	G	A	het	97.64	10
2	164393382	164393382	T	A	exonic	Matn4	.	nonsynonymous SNV	Matn4:NM_001252563:exon8:c.G1269T:p.E423D,Matn4:NM_013592:exon8:c.G1269T:p.E423D	.	het	.	2	164393382	164393382	T	A	het	97.64	10
2	164443139	164443139	C	T	exonic	Sdc4	.	nonsynonymous SNV	Sdc4:NM_011521:exon1:c.C26A:p.P9Q	.	het	.	2	164443139	164443139	C	T	het	26.64	16
2	164563437	164563437	T	C	exonic	Wfdc2	.	nonsynonymous SNV	Wfdc2:NM_001374655:exon2:c.G209C:p.C70S,Wfdc2:NM_026323:exon2:c.G209C:p.C70S	.	het	.	2	164563437	164563437	T	C	het	84.64	10
2	164665462	164665462	G	A	exonic	Wfdc11	.	nonsynonymous SNV	Wfdc11:NM_001161806:exon3:c.A74T:p.N25I	.	het	.	2	164665462	164665462	G	A	het	43.64	10
2	164786698	164786698	A	C	exonic	Snx21	.	nonsynonymous SNV	Snx21:NM_133924:exon2:c.A260C:p.E87A	.	het	.	2	164786698	164786698	A	C	het	238.68	30
2	164786722	164786722	C	T	exonic	Snx21	.	nonsynonymous SNV	Snx21:NM_133924:exon2:c.A284T:p.Q95L	.	het	.	2	164786722	164786722	C	T	het	46.64	27
2	164827811	164827811	G	A	exonic	Spata25	.	nonsynonymous SNV	Spata25:NM_029370:exon2:c.A279T:p.K93N	.	het	.	2	164827811	164827811	G	A	het	97.64	10
2	164827815	164827815	T	C	exonic	Spata25	.	nonsynonymous SNV	Spata25:NM_029370:exon2:c.C275G:p.P92R	.	het	.	2	164827815	164827815	T	C	het	97.64	10
2	164827816	164827816	G	A	exonic	Spata25	.	nonsynonymous SNV	Spata25:NM_029370:exon2:c.C274T:p.P92S	.	het	.	2	164827816	164827816	G	A	het	97.64	10
2	164827838	164827838	G	A	exonic	Spata25	.	nonsynonymous SNV	Spata25:NM_029370:exon2:c.A252T:p.R84S	.	het	.	2	164827838	164827838	G	A	het	274.64	11
2	164827843	164827843	T	C	exonic	Spata25	.	nonsynonymous SNV	Spata25:NM_029370:exon2:c.C247G:p.R83G	.	het	.	2	164827843	164827843	T	C	het	280.64	11
2	165785617	165785617	A	G	exonic	Zmynd8	.	nonsynonymous SNV	Zmynd8:NM_001252585:exon22:c.G3573C:p.E1191D,Zmynd8:NM_001252584:exon23:c.G3498C:p.E1166D,Zmynd8:NM_001281926:exon23:c.G3438C:p.E1146D,Zmynd8:NM_001363020:exon23:c.G3729C:p.E1243D,Zmynd8:NM_001291158:exon24:c.G3681C:p.E1227D,Zmynd8:NM_001363018:exon24:c.G3744C:p.E1248D,Zmynd8:NM_001363019:exon24:c.G2652C:p.E884D,Zmynd8:NM_027230:exon24:c.G3741C:p.E1247D	.	het	.	2	165785617	165785617	A	G	het	134.64	18
2	165785629	165785629	G	A	exonic	Zmynd8	.	nonsynonymous SNV	Zmynd8:NM_001252585:exon22:c.A3561T:p.K1187N,Zmynd8:NM_001252584:exon23:c.A3486T:p.K1162N,Zmynd8:NM_001281926:exon23:c.A3426T:p.K1142N,Zmynd8:NM_001363020:exon23:c.A3717T:p.K1239N,Zmynd8:NM_001291158:exon24:c.A3669T:p.K1223N,Zmynd8:NM_001363018:exon24:c.A3732T:p.K1244N,Zmynd8:NM_001363019:exon24:c.A2640T:p.K880N,Zmynd8:NM_027230:exon24:c.A3729T:p.K1243N	.	het	.	2	165785629	165785629	G	A	het	198.64	20
2	166795632	166795632	G	A	exonic	Trp53rkb	.	nonsynonymous SNV	Trp53rkb:NM_023815:exon2:c.C507A:p.H169Q	.	het	.	2	166795632	166795632	G	A	het	319.64	11
2	166795634	166795634	G	A	exonic	Trp53rkb	.	nonsynonymous SNV	Trp53rkb:NM_023815:exon2:c.T509A:p.I170N	.	het	.	2	166795634	166795634	G	A	het	319.64	11
2	166856426	166856426	T	G	exonic	Arfgef2	.	nonsynonymous SNV	Arfgef2:NM_001085495:exon14:c.T1815G:p.D605E	.	het	.	2	166856426	166856426	T	G	het	144.64	16
2	166856461	166856461	G	A	exonic	Arfgef2	.	nonsynonymous SNV	Arfgef2:NM_001085495:exon14:c.C1850A:p.A617E	.	het	.	2	166856461	166856461	G	A	het	136.64	12
2	166856481	166856481	T	A	exonic	Arfgef2	.	nonsynonymous SNV	Arfgef2:NM_001085495:exon14:c.T1870A:p.S624T	.	het	.	2	166856481	166856481	T	A	het	178.64	13
2	166856497	166856497	T	G	exonic	Arfgef2	.	nonsynonymous SNV	Arfgef2:NM_001085495:exon14:c.T1886G:p.V629G	.	het	.	2	166856497	166856497	T	G	het	317.64	17
2	166955016	166955016	A	G	exonic	Stau1	.	nonsynonymous SNV	Stau1:NM_001109905:exon5:c.A442C:p.I148L,Stau1:NM_001109906:exon5:c.A460C:p.I154L,Stau1:NM_001291160:exon5:c.A442C:p.I148L,Stau1:NM_011490:exon5:c.A442C:p.I148L	.	het	.	2	166955016	166955016	A	G	het	157.64	13
2	166955070	166955070	G	A	exonic	Stau1	.	nonsynonymous SNV	Stau1:NM_001109905:exon5:c.A388T:p.T130S,Stau1:NM_001109906:exon5:c.A406T:p.T136S,Stau1:NM_001291160:exon5:c.A388T:p.T130S,Stau1:NM_011490:exon5:c.A388T:p.T130S	.	het	.	2	166955070	166955070	G	A	het	57.64	15
2	166955074	166955074	C	T	exonic	Stau1	.	nonsynonymous SNV	Stau1:NM_001109905:exon5:c.T384A:p.F128L,Stau1:NM_001109906:exon5:c.T402A:p.F134L,Stau1:NM_001291160:exon5:c.T384A:p.F128L,Stau1:NM_011490:exon5:c.T384A:p.F128L	.	het	.	2	166955074	166955074	C	T	het	113.64	16
2	166955099	166955099	C	T	exonic	Stau1	.	nonsynonymous SNV	Stau1:NM_001109905:exon5:c.G359A:p.S120N,Stau1:NM_001109906:exon5:c.G377A:p.S126N,Stau1:NM_001291160:exon5:c.G359A:p.S120N,Stau1:NM_011490:exon5:c.G359A:p.S120N	.	het	.	2	166955099	166955099	C	T	het	97.64	14
2	167038213	167038213	T	C	exonic	Znfx1	.	nonsynonymous SNV	Znfx1:NM_001291162:exon7:c.T1650G:p.D550E,Znfx1:NM_001033196:exon14:c.T4242G:p.D1414E	.	het	.	2	167038213	167038213	T	C	het	70.64	12
2	167038278	167038278	A	T	exonic	Znfx1	.	nonsynonymous SNV	Znfx1:NM_001291162:exon7:c.G1585A:p.E529K,Znfx1:NM_001033196:exon14:c.G4177A:p.E1393K	.	het	.	2	167038278	167038278	A	T	het	30.64	13
2	168676146	168676146	T	G	exonic	Atp9a	.	nonsynonymous SNV	Atp9a:NM_001289445:exon10:c.G824C:p.S275T,Atp9a:NM_001289446:exon10:c.G818C:p.S273T,Atp9a:NM_001354977:exon10:c.G806C:p.S269T,Atp9a:NM_001354978:exon10:c.G584C:p.S195T,Atp9a:NM_015731:exon10:c.G872C:p.S291T	.	het	.	2	168676146	168676146	T	G	het	91.64	12
2	168676152	168676152	C	T	exonic	Atp9a	.	nonsynonymous SNV	Atp9a:NM_001289445:exon10:c.C818A:p.P273H,Atp9a:NM_001289446:exon10:c.C812A:p.P271H,Atp9a:NM_001354977:exon10:c.C800A:p.P267H,Atp9a:NM_001354978:exon10:c.C578A:p.P193H,Atp9a:NM_015731:exon10:c.C866A:p.P289H	.	het	.	2	168676152	168676152	C	T	het	91.64	12
2	168676155	168676155	T	C	exonic	Atp9a	.	nonsynonymous SNV	Atp9a:NM_001289445:exon10:c.A815G:p.D272G,Atp9a:NM_001289446:exon10:c.A809G:p.D270G,Atp9a:NM_001354977:exon10:c.A797G:p.D266G,Atp9a:NM_001354978:exon10:c.A575G:p.D192G,Atp9a:NM_015731:exon10:c.A863G:p.D288G	.	het	.	2	168676155	168676155	T	C	het	91.64	12
2	172474045	172474045	A	G	exonic	Fam209	.	nonsynonymous SNV	Fam209:NM_029608:exon2:c.C339G:p.F113L	.	het	.	2	172474045	172474045	A	G	het	130.64	14
2	173157349	173157349	C	A	exonic	Pck1	.	nonsynonymous SNV	Pck1:NM_011044:exon8:c.G1307A:p.R436H	.	het	.	2	173157349	173157349	C	A	het	227.64	20
2	173158249	173158249	G	C	exonic	Pck1	.	nonsynonymous SNV	Pck1:NM_011044:exon10:c.G1472C:p.G491A	.	het	.	2	173158249	173158249	G	C	het	57.64	21
2	173158281	173158281	T	G	exonic	Pck1	.	nonsynonymous SNV	Pck1:NM_011044:exon10:c.C1504G:p.H502D	.	het	.	2	173158281	173158281	T	G	het	185.64	19
2	173569034	173569034	T	C	exonic	Ankrd60	.	nonsynonymous SNV	Ankrd60:NM_027303:exon4:c.T425G:p.L142R	.	het	.	2	173569034	173569034	T	C	het	181.64	12
2	173737717	173737717	T	G	exonic	Vapb	.	nonsynonymous SNV	Vapb:NM_019806:exon1:c.A25G:p.S9G	.	het	.	2	173737717	173737717	T	G	het	22.64	20
2	173737720	173737720	A	G	exonic	Vapb	.	nonsynonymous SNV	Vapb:NM_019806:exon1:c.C28G:p.L10V	.	het	.	2	173737720	173737720	A	G	het	22.64	20
2	174465844	174465844	C	T	exonic	Prelid3b	.	nonsynonymous SNV	Prelid3b:NM_025531:exon6:c.G558A:p.M186I	.	het	.	2	174465844	174465844	C	T	het	76.64	17
2	174465916	174465916	A	G	exonic	Prelid3b	.	nonsynonymous SNV	Prelid3b:NM_025531:exon6:c.G486C:p.W162C	.	het	.	2	174465916	174465916	A	G	het	175.64	14
2	174465924	174465924	T	G	exonic	Prelid3b	.	nonsynonymous SNV	Prelid3b:NM_025531:exon6:c.A478C:p.M160L	.	het	.	2	174465924	174465924	T	G	het	175.64	14
2	177195818	177195818	T	A	exonic	Gm14410	.	nonsynonymous SNV	Gm14410:NM_001374129:exon3:c.C14T:p.T5I	.	het	.	2	177195818	177195818	T	A	het	164.64	11
2	180176639	180176639	A	G	exonic	Lama5	.	nonsynonymous SNV	Lama5:NM_001081171:exon79:c.T11065C:p.C3689R	.	het	.	2	180176639	180176639	A	G	het	200.64	12
2	180176650	180176650	C	A	exonic	Lama5	.	nonsynonymous SNV	Lama5:NM_001081171:exon79:c.G11054T:p.G3685V	.	het	.	2	180176650	180176650	C	A	het	391.64	17
2	180176653	180176653	A	G	exonic	Lama5	.	nonsynonymous SNV	Lama5:NM_001081171:exon79:c.T11051C:p.V3684A	.	het	.	2	180176653	180176653	A	G	het	391.64	17
2	180176656	180176656	A	T	exonic	Lama5	.	nonsynonymous SNV	Lama5:NM_001081171:exon79:c.C11048A:p.A3683E	.	het	.	2	180176656	180176656	A	T	het	391.64	17
2	180176667	180176667	T	A	exonic	Lama5	.	nonsynonymous SNV	Lama5:NM_001081171:exon79:c.A11037T:p.Q3679H	.	het	.	2	180176667	180176667	T	A	het	136.64	12
2	180176671	180176671	G	T	exonic	Lama5	.	nonsynonymous SNV	Lama5:NM_001081171:exon79:c.T11033A:p.V3678E	.	het	.	2	180176671	180176671	G	T	het	136.64	12
2	180176674	180176674	A	C	exonic	Lama5	.	nonsynonymous SNV	Lama5:NM_001081171:exon79:c.C11030G:p.S3677C	.	het	.	2	180176674	180176674	A	C	het	136.64	12
2	180176678	180176678	T	A	exonic	Lama5	.	nonsynonymous SNV	Lama5:NM_001081171:exon79:c.G11026T:p.A3676S	.	het	.	2	180176678	180176678	T	A	het	136.64	12
2	180176693	180176693	A	T	exonic	Lama5	.	nonsynonymous SNV	Lama5:NM_001081171:exon79:c.C11011A:p.P3671T	.	het	.	2	180176693	180176693	A	T	het	205.64	19
2	180176696	180176696	C	T	exonic	Lama5	.	nonsynonymous SNV	Lama5:NM_001081171:exon79:c.G11008A:p.A3670T	.	het	.	2	180176696	180176696	C	T	het	202.64	20
2	180176699	180176699	T	G	exonic	Lama5	.	nonsynonymous SNV	Lama5:NM_001081171:exon79:c.G11005C:p.G3669R	.	het	.	2	180176699	180176699	T	G	het	202.64	20
2	180176716	180176716	C	T	exonic	Lama5	.	nonsynonymous SNV	Lama5:NM_001081171:exon79:c.G10988A:p.R3663K	.	het	.	2	180176716	180176716	C	T	het	104.64	17
2	180197408	180197408	G	A	exonic	Lama5	.	nonsynonymous SNV	Lama5:NM_001081171:exon18:c.G2306T:p.W769L	.	het	.	2	180197408	180197408	G	A	het	40.64	14
2	180197460	180197460	A	G	exonic	Lama5	.	nonsynonymous SNV	Lama5:NM_001081171:exon18:c.T2254C:p.C752R	.	het	.	2	180197460	180197460	A	G	het	72.64	10
2	180582948	180582948	T	C	exonic	Mrgbp	.	nonsynonymous SNV	Mrgbp:NM_001356494:exon2:c.G141C:p.K47N,Mrgbp:NM_028479:exon2:c.G141C:p.K47N	.	het	.	2	180582948	180582948	T	C	het	409.64	26
2	180582949	180582949	C	T	exonic	Mrgbp	.	nonsynonymous SNV	Mrgbp:NM_001356494:exon2:c.C142T:p.P48S,Mrgbp:NM_028479:exon2:c.C142T:p.P48S	.	het	.	2	180582949	180582949	C	T	het	409.64	26
2	180582950	180582950	A	G	exonic	Mrgbp	.	nonsynonymous SNV	Mrgbp:NM_001356494:exon2:c.C143G:p.P48R,Mrgbp:NM_028479:exon2:c.C143G:p.P48R	.	het	.	2	180582950	180582950	A	G	het	409.64	26
2	180910836	180910836	A	G	exonic	Ythdf1	.	nonsynonymous SNV	Ythdf1:NM_173761:exon4:c.G1504C:p.V502L	.	het	.	2	180910836	180910836	A	G	het	28.64	15
2	180910849	180910849	A	T	exonic	Ythdf1	.	nonsynonymous SNV	Ythdf1:NM_173761:exon4:c.C1491A:p.N497K	.	het	.	2	180910849	180910849	A	T	het	175.64	14
2	180910854	180910854	C	A	exonic	Ythdf1	.	nonsynonymous SNV	Ythdf1:NM_173761:exon4:c.A1486T:p.N496Y	.	het	.	2	180910854	180910854	C	A	het	213.64	15
2	180910860	180910860	T	C	exonic	Ythdf1	.	nonsynonymous SNV	Ythdf1:NM_173761:exon4:c.C1480G:p.L494V	.	het	.	2	180910860	180910860	T	C	het	43.64	10
2	181076197	181076197	C	T	exonic	Kcnq2	.	nonsynonymous SNV	Kcnq2:NM_001006674:exon14:c.G1688A:p.C563Y	.	het	.	2	181076197	181076197	C	T	het	111.64	12
2	181148649	181148649	C	T	exonic	Eef1a2	.	nonsynonymous SNV	Eef1a2:NM_007906:exon7:c.G1213A:p.V405I	.	het	.	2	181148649	181148649	C	T	het	34.64	16
2	181148650	181148650	A	G	exonic	Eef1a2	.	nonsynonymous SNV	Eef1a2:NM_007906:exon7:c.G1212C:p.M404I	.	het	.	2	181148650	181148650	A	G	het	34.64	16
2	181621947	181621947	A	G	exonic	Prpf6	.	nonsynonymous SNV	Prpf6:NM_133701:exon5:c.T599G:p.V200G	.	het	.	2	181621947	181621947	A	G	het	90.64	41
2	181622277	181622277	A	C	exonic	Prpf6	.	nonsynonymous SNV	Prpf6:NM_133701:exon6:c.G731C:p.G244A	.	het	.	2	181622277	181622277	A	C	het	40.64	29
2	181632823	181632823	C	T	exonic	Prpf6	.	nonsynonymous SNV	Prpf6:NM_133701:exon9:c.A1092T:p.Q364H	.	het	.	2	181632823	181632823	C	T	het	495.64	24
2	181632825	181632825	G	A	exonic	Prpf6	.	nonsynonymous SNV	Prpf6:NM_133701:exon9:c.C1094A:p.A365D	.	het	.	2	181632825	181632825	G	A	het	495.64	24
2	181632876	181632876	A	G	exonic	Prpf6	.	nonsynonymous SNV	Prpf6:NM_133701:exon9:c.T1145G:p.L382R	.	het	.	2	181632876	181632876	A	G	het	118.64	18
3	5561033	5561033	T	C	exonic	Pex2	.	nonsynonymous SNV	Pex2:NM_001267714:exon4:c.A715G:p.S239G,Pex2:NM_001267715:exon4:c.A715G:p.S239G,Pex2:NM_001163301:exon5:c.A715G:p.S239G,Pex2:NM_001163302:exon5:c.A715G:p.S239G,Pex2:NM_001163305:exon5:c.A715G:p.S239G,Pex2:NM_001163306:exon5:c.A715G:p.S239G,Pex2:NM_008994:exon6:c.A715G:p.S239G	.	het	.	3	5561033	5561033	T	C	het	34.64	16
3	5561035	5561035	A	G	exonic	Pex2	.	nonsynonymous SNV	Pex2:NM_001267714:exon4:c.G713C:p.G238A,Pex2:NM_001267715:exon4:c.G713C:p.G238A,Pex2:NM_001163301:exon5:c.G713C:p.G238A,Pex2:NM_001163302:exon5:c.G713C:p.G238A,Pex2:NM_001163305:exon5:c.G713C:p.G238A,Pex2:NM_001163306:exon5:c.G713C:p.G238A,Pex2:NM_008994:exon6:c.G713C:p.G238A	.	het	.	3	5561035	5561035	A	G	het	34.64	16
3	5561078	5561078	G	T	exonic	Pex2	.	nonsynonymous SNV	Pex2:NM_001267714:exon4:c.T670A:p.C224S,Pex2:NM_001267715:exon4:c.T670A:p.C224S,Pex2:NM_001163301:exon5:c.T670A:p.C224S,Pex2:NM_001163302:exon5:c.T670A:p.C224S,Pex2:NM_001163305:exon5:c.T670A:p.C224S,Pex2:NM_001163306:exon5:c.T670A:p.C224S,Pex2:NM_008994:exon6:c.T670A:p.C224S	.	het	.	3	5561078	5561078	G	T	het	31.64	17
3	7528666	7528666	T	C	exonic	Zc2hc1a	.	nonsynonymous SNV	Zc2hc1a:NM_173181:exon7:c.T683C:p.I228T	.	het	.	3	7528666	7528666	T	C	het	189.64	54
3	7539141	7539141	A	G	exonic	Zc2hc1a	.	nonsynonymous SNV	Zc2hc1a:NM_173181:exon8:c.T767G:p.L256R	.	het	.	3	7539141	7539141	A	G	het	53.64	10
3	7539172	7539172	T	G	exonic	Zc2hc1a	.	nonsynonymous SNV	Zc2hc1a:NM_173181:exon8:c.C798G:p.N266K	.	het	.	3	7539172	7539172	T	G	het	82.64	15
3	7539176	7539176	T	C	exonic	Zc2hc1a	.	nonsynonymous SNV	Zc2hc1a:NM_173181:exon8:c.G802C:p.A268P	.	het	.	3	7539176	7539176	T	C	het	82.64	15
3	14480876	14480876	G	A	exonic	Slc7a12	.	nonsynonymous SNV	Slc7a12:NM_080852:exon1:c.T80A:p.V27E	.	het	.	3	14480876	14480876	G	A	het	160.64	34
3	14480923	14480923	C	G	exonic	Slc7a12	.	nonsynonymous SNV	Slc7a12:NM_080852:exon1:c.T127G:p.S43A	.	het	.	3	14480923	14480923	C	G	het	67.64	51
3	14480938	14480938	G	C	exonic	Slc7a12	.	nonsynonymous SNV	Slc7a12:NM_080852:exon1:c.G142C:p.A48P	.	het	.	3	14480938	14480938	G	C	het	90.64	57
3	14480939	14480939	C	G	exonic	Slc7a12	.	nonsynonymous SNV	Slc7a12:NM_080852:exon1:c.C143G:p.A48G	.	het	.	3	14480939	14480939	C	G	het	90.64	57
3	14480978	14480978	A	G	exonic	Slc7a12	.	nonsynonymous SNV	Slc7a12:NM_080852:exon1:c.A182G:p.N61S	.	het	.	3	14480978	14480978	A	G	het	54.64	54
3	14480980	14480980	T	C	exonic	Slc7a12	.	nonsynonymous SNV	Slc7a12:NM_080852:exon1:c.G184C:p.A62P	.	het	.	3	14480980	14480980	T	C	het	54.64	54
3	14480981	14480981	A	T	exonic	Slc7a12	.	nonsynonymous SNV	Slc7a12:NM_080852:exon1:c.C185T:p.A62V	.	het	.	3	14480981	14480981	A	T	het	54.64	54
3	14481005	14481005	A	C	exonic	Slc7a12	.	nonsynonymous SNV	Slc7a12:NM_080852:exon1:c.T209C:p.L70S	.	het	.	3	14481005	14481005	A	C	het	49.64	53
3	14481017	14481017	C	T	exonic	Slc7a12	.	nonsynonymous SNV	Slc7a12:NM_080852:exon1:c.C221T:p.S74F	.	het	.	3	14481017	14481017	C	T	het	309.64	62
3	14481053	14481053	A	C	exonic	Slc7a12	.	nonsynonymous SNV	Slc7a12:NM_080852:exon1:c.T257C:p.V86A	.	het	.	3	14481053	14481053	A	C	het	34.64	46
3	14481225	14481225	T	G	exonic	Slc7a12	.	nonsynonymous SNV	Slc7a12:NM_080852:exon1:c.T429G:p.S143R	.	het	.	3	14481225	14481225	T	G	het	106.64	37
3	14505553	14505553	A	G	exonic	Slc7a12	.	nonsynonymous SNV	Slc7a12:NM_080852:exon4:c.C1364G:p.S455C	.	het	.	3	14505553	14505553	A	G	het	61.64	37
3	14505555	14505555	C	A	exonic	Slc7a12	.	nonsynonymous SNV	Slc7a12:NM_080852:exon4:c.C1366A:p.P456T	.	het	.	3	14505555	14505555	C	A	het	61.64	37
3	14539714	14539714	A	C	exonic	Lrrcc1	.	nonsynonymous SNV	Lrrcc1:NM_001163579:exon5:c.A615C:p.E205D,Lrrcc1:NM_001163580:exon5:c.A615C:p.E205D,Lrrcc1:NM_028915:exon5:c.A615C:p.E205D	.	het	.	3	14539714	14539714	A	C	het	39.64	21
3	14540010	14540010	C	A	exonic	Lrrcc1	.	nonsynonymous SNV	Lrrcc1:NM_001163579:exon6:c.G805A:p.V269M,Lrrcc1:NM_001163580:exon6:c.G805A:p.V269M,Lrrcc1:NM_028915:exon6:c.G805A:p.V269M	.	het	.	3	14540010	14540010	C	A	het	76.64	29
3	14540014	14540014	T	C	exonic	Lrrcc1	.	nonsynonymous SNV	Lrrcc1:NM_001163579:exon6:c.G809C:p.C270S,Lrrcc1:NM_001163580:exon6:c.G809C:p.C270S,Lrrcc1:NM_028915:exon6:c.G809C:p.C270S	.	het	.	3	14540014	14540014	T	C	het	82.64	27
3	14551526	14551526	T	G	exonic	Lrrcc1	.	nonsynonymous SNV	Lrrcc1:NM_001163579:exon11:c.A1747G:p.R583G,Lrrcc1:NM_001163580:exon11:c.A1699G:p.R567G,Lrrcc1:NM_028915:exon11:c.A1747G:p.R583G	.	het	.	3	14551526	14551526	T	G	het	109.64	21
3	15542980	15542980	C	A	exonic	Sirpb1b	.	nonsynonymous SNV	Sirpb1b:NM_001173460:exon3:c.G704T:p.R235L	.	het	.	3	15542980	15542980	C	A	het	167.64	12
3	15548632	15548632	A	G	exonic	Sirpb1b	.	nonsynonymous SNV	Sirpb1b:NM_001173460:exon2:c.G389C:p.R130T	.	het	.	3	15548632	15548632	A	G	het	298.17	64
3	15548642	15548642	T	G	exonic	Sirpb1b	.	nonsynonymous SNV	Sirpb1b:NM_001173460:exon2:c.G379C:p.E127Q	.	het	.	3	15548642	15548642	T	G	het	256.64	62
3	15548683	15548683	A	C	exonic	Sirpb1b	.	nonsynonymous SNV	Sirpb1b:NM_001173460:exon2:c.C338G:p.S113W	.	het	.	3	15548683	15548683	A	C	het	53.64	53
3	15548743	15548743	T	G	exonic	Sirpb1b	.	nonsynonymous SNV	Sirpb1b:NM_001173460:exon2:c.T278C:p.V93A	.	het	.	3	15548743	15548743	T	G	het	82.64	57
3	15548750	15548750	A	G	exonic	Sirpb1b	.	nonsynonymous SNV	Sirpb1b:NM_001173460:exon2:c.T271C:p.S91P	.	het	.	3	15548750	15548750	A	G	het	70.64	61
3	15963441	15963441	C	T	exonic	Gm5150	.	nonsynonymous SNV	Gm5150:NM_001081687:exon3:c.T665A:p.I222N	.	het	.	3	15963441	15963441	C	T	het	52.64	17
3	19978877	19978877	T	C	exonic	Cp	.	nonsynonymous SNV	Cp:NM_001276248:exon11:c.T1864C:p.Y622H,Cp:NM_001276250:exon11:c.T1864C:p.Y622H,Cp:NM_001374677:exon11:c.T1864C:p.Y622H,Cp:NM_007752:exon11:c.T1867C:p.Y623H	.	het	.	3	19978877	19978877	T	C	het	30.64	24
3	19978940	19978940	C	T	exonic	Cp	.	nonsynonymous SNV	Cp:NM_001276248:exon11:c.G1927T:p.A643S,Cp:NM_001276250:exon11:c.G1927T:p.A643S,Cp:NM_001374677:exon11:c.G1927T:p.A643S,Cp:NM_007752:exon11:c.G1930T:p.A644S	.	het	.	3	19978940	19978940	C	T	het	41.64	20
3	19980798	19980798	A	T	exonic	Cp	.	nonsynonymous SNV	Cp:NM_001276248:exon12:c.A2267T:p.N756I,Cp:NM_001276250:exon12:c.A2267T:p.N756I,Cp:NM_001374677:exon12:c.A2267T:p.N756I,Cp:NM_007752:exon12:c.A2270T:p.N757I	.	het	.	3	19980798	19980798	A	T	het	37.64	15
3	20105747	20105747	A	C	exonic	Hltf	.	nonsynonymous SNV	Hltf:NM_001355097:exon19:c.T2161C:p.S721P,Hltf:NM_009210:exon19:c.T2161C:p.S721P	.	het	.	3	20105747	20105747	A	C	het	26.64	34
3	20263748	20263748	A	G	exonic	Cpb1	.	nonsynonymous SNV	Cpb1:NM_029706:exon7:c.T611C:p.L204P	.	het	.	3	20263748	20263748	A	G	het	68.64	18
3	23846558	23846558	G	A	exonic	Naaladl2	.	nonsynonymous SNV	Naaladl2:NM_001326288:exon13:c.A2107T:p.S703C	.	het	.	3	23846558	23846558	G	A	het	394.64	16
3	23846576	23846576	A	C	exonic	Naaladl2	.	nonsynonymous SNV	Naaladl2:NM_001326288:exon13:c.C2089G:p.P697A	.	het	.	3	23846576	23846576	A	C	het	32.64	14
3	23846595	23846595	A	G	exonic	Naaladl2	.	nonsynonymous SNV	Naaladl2:NM_001326288:exon13:c.G2070C:p.E690D	.	het	.	3	23846595	23846595	A	G	het	85.64	14
3	23846599	23846599	T	G	exonic	Naaladl2	.	nonsynonymous SNV	Naaladl2:NM_001326288:exon13:c.A2066C:p.D689A	.	het	.	3	23846599	23846599	T	G	het	85.64	14
3	23846600	23846600	C	T	exonic	Naaladl2	.	nonsynonymous SNV	Naaladl2:NM_001326288:exon13:c.G2065A:p.D689N	.	het	.	3	23846600	23846600	C	T	het	85.64	14
3	27148873	27148873	C	T	exonic	Ect2	.	nonsynonymous SNV	Ect2:NM_007900:exon4:c.G225A:p.M75I	.	het	.	3	27148873	27148873	C	T	het	40.64	14
3	28713761	28713761	T	G	exonic	Slc2a2	.	nonsynonymous SNV	Slc2a2:NM_031197:exon4:c.T437G:p.F146C	.	het	.	3	28713761	28713761	T	G	het	194.64	126
3	28713779	28713779	T	C	exonic	Slc2a2	.	nonsynonymous SNV	Slc2a2:NM_031197:exon4:c.T455C:p.L152P	.	het	.	3	28713779	28713779	T	C	het	41.64	100
3	28713817	28713817	G	T	exonic	Slc2a2	.	nonsynonymous SNV	Slc2a2:NM_031197:exon4:c.G493T:p.G165W	.	het	.	3	28713817	28713817	G	T	het	831.64	80
3	31117536	31117536	A	C	exonic	Skil	.	nonsynonymous SNV	Skil:NM_001039090:exon6:c.A1670C:p.Q557P,Skil:NM_011386:exon6:c.A1808C:p.Q603P,Skil:NM_001271772:exon8:c.A1430C:p.Q477P	.	het	.	3	31117536	31117536	A	C	het	262.64	35
3	31117548	31117548	G	A	exonic	Skil	.	nonsynonymous SNV	Skil:NM_001039090:exon6:c.C1682A:p.T561N,Skil:NM_011386:exon6:c.C1820A:p.T607N,Skil:NM_001271772:exon8:c.C1442A:p.T481N	.	het	.	3	31117548	31117548	G	A	het	199.64	36
3	31117550	31117550	G	A	exonic	Skil	.	nonsynonymous SNV	Skil:NM_001039090:exon6:c.T1684A:p.C562S,Skil:NM_011386:exon6:c.T1822A:p.C608S,Skil:NM_001271772:exon8:c.T1444A:p.C482S	.	het	.	3	31117550	31117550	G	A	het	61.64	37
3	33821496	33821496	A	G	exonic	Ccdc39	.	nonsynonymous SNV	Ccdc39:NM_026222:exon12:c.A1546C:p.K516Q	.	het	.	3	33821496	33821496	A	G	het	133.64	32
3	36000503	36000503	G	A	exonic	Mccc1	.	nonsynonymous SNV	Mccc1:NM_023644:exon1:c.C55T:p.P19S	.	het	.	3	36000503	36000503	G	A	het	386.64	17
3	36561103	36561103	G	A	exonic	Exosc9	.	nonsynonymous SNV	Exosc9:NM_019393:exon8:c.G739A:p.V247I	.	het	.	3	36561103	36561103	G	A	het	49.64	11
3	36567029	36567029	A	G	exonic	Ccna2	.	nonsynonymous SNV	Ccna2:NM_009828:exon7:c.G1057C:p.A353P	.	het	.	3	36567029	36567029	A	G	het	347.64	15
3	36590695	36590695	0	C	exonic	Bbs7	.	nonsynonymous SNV	Bbs7:NM_027810:exon13:c.C1328G:p.A443G	.	het	.	3	36590695	36590695	-	C	het	439.60	16
3	36590698	36590698	A	G	exonic	Bbs7	.	nonsynonymous SNV	Bbs7:NM_027810:exon13:c.T1325C:p.L442P	.	het	.	3	36590698	36590698	A	G	het	436.64	17
3	38457314	38457314	T	C	exonic	Ankrd50	.	nonsynonymous SNV	Ankrd50:NM_001373894:exon4:c.C1014G:p.C338W	.	het	.	3	38457314	38457314	T	C	het	61.64	18
3	38457466	38457466	A	G	exonic	Ankrd50	.	nonsynonymous SNV	Ankrd50:NM_001373894:exon4:c.A862C:p.T288P	.	het	.	3	38457466	38457466	A	G	het	136.64	12
3	40970478	40970478	T	C	exonic	Larp1b	.	nonsynonymous SNV	Larp1b:NM_001368221:exon6:c.G530C:p.R177P,Larp1b:NM_001368222:exon6:c.G389C:p.R130P,Larp1b:NM_001040399:exon7:c.G530C:p.R177P	.	het	.	3	40970478	40970478	T	C	het	216.64	19
3	40970582	40970582	G	A	exonic	Larp1b	.	nonsynonymous SNV	Larp1b:NM_001368221:exon6:c.G634A:p.E212K,Larp1b:NM_001368222:exon6:c.G493A:p.E165K,Larp1b:NM_001040399:exon7:c.G634A:p.E212K	.	het	.	3	40970582	40970582	G	A	het	222.64	17
3	41734221	41734221	0	G	exonic	Sclt1	.	nonsynonymous SNV	Sclt1:NM_001081411:exon2:c.G49C:p.D17H	.	het	.	3	41734221	41734221	-	G	het	62.60	17
3	50435441	50435441	G	A	exonic	Slc7a11	.	nonsynonymous SNV	Slc7a11:NM_011990:exon3:c.C428T:p.S143F	.	het	.	3	50435441	50435441	G	A	het	61.64	15
3	52345138	52345138	G	A	exonic	Foxo1	.	nonsynonymous SNV	Foxo1:NM_019739:exon2:c.G721A:p.G241S	.	het	.	3	52345138	52345138	G	A	het	85.64	10
3	53462353	53462353	A	G	exonic	Nhlrc3	.	nonsynonymous SNV	Nhlrc3:NM_172501:exon2:c.G196C:p.V66L	.	het	.	3	53462353	53462353	A	G	het	22.64	20
3	53462355	53462355	A	G	exonic	Nhlrc3	.	nonsynonymous SNV	Nhlrc3:NM_172501:exon2:c.G194C:p.C65S	.	het	.	3	53462355	53462355	A	G	het	22.64	20
3	53547618	53547618	A	C	exonic	Frem2	.	nonsynonymous SNV	Frem2:NM_172862:exon9:c.T6536G:p.F2179C	.	het	.	3	53547618	53547618	A	C	het	20.64	18
3	53861234	53861234	A	G	exonic	Ufm1	.	nonsynonymous SNV	Ufm1:NM_026435:exon3:c.T98C:p.L33P	.	het	.	3	53861234	53861234	A	G	het	211.64	17
3	54315816	54315816	C	T	exonic	Trpc4	.	nonsynonymous SNV	Trpc4:NM_001253682:exon10:c.G2172T:p.E724D,Trpc4:NM_016984:exon10:c.G2172T:p.E724D	.	het	.	3	54315816	54315816	C	T	het	43.64	13
3	54315818	54315818	C	T	exonic	Trpc4	.	nonsynonymous SNV	Trpc4:NM_001253682:exon10:c.C2174T:p.A725V,Trpc4:NM_016984:exon10:c.C2174T:p.A725V	.	het	.	3	54315818	54315818	C	T	het	43.64	13
3	54317478	54317478	T	C	exonic	Trpc4	.	nonsynonymous SNV	Trpc4:NM_001253682:exon11:c.A2247C:p.E749D,Trpc4:NM_016984:exon11:c.A2247C:p.E749D	.	het	.	3	54317478	54317478	T	C	het	160.64	19
3	54317479	54317479	A	C	exonic	Trpc4	.	nonsynonymous SNV	Trpc4:NM_001253682:exon11:c.G2248C:p.V750L,Trpc4:NM_016984:exon11:c.G2248C:p.V750L	.	het	.	3	54317479	54317479	A	C	het	160.64	19
3	54317779	54317779	A	G	exonic	Trpc4	.	nonsynonymous SNV	Trpc4:NM_016984:exon11:c.C2548G:p.Q850E	.	het	.	3	54317779	54317779	A	G	het	163.64	18
3	54317846	54317846	A	T	exonic	Trpc4	.	nonsynonymous SNV	Trpc4:NM_016984:exon11:c.C2615T:p.A872V,Trpc4:NM_001253682:exon12:c.C2363T:p.A788V	.	het	.	3	54317846	54317846	A	T	het	69.64	15
3	54317852	54317852	A	C	exonic	Trpc4	.	nonsynonymous SNV	Trpc4:NM_016984:exon11:c.G2621C:p.G874A,Trpc4:NM_001253682:exon12:c.G2369C:p.G790A	.	het	.	3	54317852	54317852	A	C	het	69.64	15
3	55521900	55521900	A	C	exonic	Dclk1	.	nonsynonymous SNV	Dclk1:NM_001111052:exon13:c.A1188C:p.Q396H,Dclk1:NM_001357468:exon13:c.A1236C:p.Q412H,Dclk1:NM_001357476:exon13:c.A1185C:p.Q395H,Dclk1:NM_001357466:exon17:c.A2109C:p.Q703H,Dclk1:NM_001357469:exon17:c.A2157C:p.Q719H	.	het	.	3	55521900	55521900	A	C	het	142.64	10
3	55521901	55521901	G	A	exonic	Dclk1	.	nonsynonymous SNV	Dclk1:NM_001111052:exon13:c.C1189A:p.Q397K,Dclk1:NM_001357468:exon13:c.C1237A:p.Q413K,Dclk1:NM_001357476:exon13:c.C1186A:p.Q396K,Dclk1:NM_001357466:exon17:c.C2110A:p.Q704K,Dclk1:NM_001357469:exon17:c.C2158A:p.Q720K	.	het	.	3	55521901	55521901	G	A	het	142.64	10
3	55521904	55521904	C	T	exonic	Dclk1	.	nonsynonymous SNV	Dclk1:NM_001111052:exon13:c.C1192T:p.P398S,Dclk1:NM_001357468:exon13:c.C1240T:p.P414S,Dclk1:NM_001357476:exon13:c.C1189T:p.P397S,Dclk1:NM_001357466:exon17:c.C2113T:p.P705S,Dclk1:NM_001357469:exon17:c.C2161T:p.P721S	.	het	.	3	55521904	55521904	C	T	het	142.64	10
3	58548770	58548770	G	A	exonic	Eif2a	.	nonsynonymous SNV	Eif2a:NM_001005509:exon10:c.T1189A:p.L397M	.	het	.	3	58548770	58548770	G	A	het	118.64	18
3	59275958	59275958	A	G	exonic	Med12l	.	nonsynonymous SNV	Med12l:NM_177855:exon38:c.A5774G:p.Q1925R	.	het	.	3	59275958	59275958	A	G	het	119.64	11
3	62423512	62423512	C	T	exonic	Arhgef26	.	nonsynonymous SNV	Arhgef26:NM_001081295:exon7:c.C1646T:p.P549L	.	het	.	3	62423512	62423512	C	T	het	46.64	12
3	62423580	62423580	T	A	exonic	Arhgef26	.	nonsynonymous SNV	Arhgef26:NM_001081295:exon7:c.T1714A:p.F572I	.	het	.	3	62423580	62423580	T	A	het	35.64	13
3	63326788	63326788	C	A	exonic	Mme	.	nonsynonymous SNV	Mme:NM_001289462:exon4:c.T271A:p.W91R,Mme:NM_001289463:exon4:c.T271A:p.W91R,Mme:NM_001357335:exon4:c.T271A:p.W91R,Mme:NM_008604:exon4:c.T271A:p.W91R	.	het	.	3	63326788	63326788	C	A	het	66.64	12
3	63915700	63915700	A	G	exonic	E130311K13Rik	.	nonsynonymous SNV	E130311K13Rik:NM_001357824:exon5:c.G393C:p.L131F,E130311K13Rik:NM_177856:exon5:c.G522C:p.L174F	.	het	.	3	63915700	63915700	A	G	het	118.64	18
3	63982412	63982412	T	C	exonic	Gmps	.	nonsynonymous SNV	Gmps:NM_001033300:exon3:c.G211C:p.A71P	.	het	.	3	63982412	63982412	T	C	het	37.64	15
3	63982413	63982413	G	A	exonic	Gmps	.	nonsynonymous SNV	Gmps:NM_001033300:exon3:c.C212A:p.A71D	.	het	.	3	63982413	63982413	G	A	het	37.64	15
3	64275000	64275000	C	G	exonic	Vmn2r3	.	nonsynonymous SNV	Vmn2r3:NM_001384949:exon4:c.T1259C:p.L420P	.	het	.	3	64275000	64275000	C	G	het	82.64	15
3	64275045	64275045	G	C	exonic	Vmn2r3	.	nonsynonymous SNV	Vmn2r3:NM_001384949:exon4:c.A1214G:p.E405G	.	het	.	3	64275045	64275045	G	C	het	98.64	22
3	64556759	64556759	G	T	exonic	Vmn2r6	.	nonsynonymous SNV	Vmn2r6:NM_001104619:exon2:c.T386A:p.F129Y,Vmn2r6:NM_001385213:exon3:c.T659A:p.F220Y	.	het	.	3	64556759	64556759	G	T	het	34.64	16
3	65946646	65946646	G	A	exonic	Ccnl1	.	nonsynonymous SNV	Ccnl1:NM_019937:exon11:c.A1553T:p.K518M,Ccnl1:NM_001355432:exon12:c.A1130T:p.K377M,Ccnl1:NM_001355433:exon12:c.A1070T:p.K357M	.	het	.	3	65946646	65946646	G	A	het	211.64	11
3	72918638	72918638	C	A	exonic	Sis	.	nonsynonymous SNV	Sis:NM_001081137:exon33:c.G3862T:p.D1288Y	.	het	.	3	72918638	72918638	C	A	het	107.64	18
3	72921238	72921238	A	T	exonic	Sis	.	nonsynonymous SNV	Sis:NM_001081137:exon30:c.T3503A:p.F1168Y	.	het	.	3	72921238	72921238	A	T	het	30.64	13
3	73050764	73050764	G	T	exonic	Slitrk3	.	nonsynonymous SNV	Slitrk3:NM_001357851:exon2:c.T674A:p.L225Q,Slitrk3:NM_198864:exon2:c.T674A:p.L225Q	.	het	.	3	73050764	73050764	G	T	het	46.64	12
3	79449358	79449358	T	A	exonic	Gm17359	.	nonsynonymous SNV	Gm17359:NM_001142953:exon4:c.T467A:p.L156Q	.	het	.	3	79449358	79449358	T	A	het	22.64	20
3	79449401	79449401	T	C	exonic	Gm17359	.	nonsynonymous SNV	Gm17359:NM_001142953:exon4:c.G510C:p.R170S	.	het	.	3	79449401	79449401	T	C	het	49.64	10
3	79449424	79449424	C	T	exonic	Gm17359	.	nonsynonymous SNV	Gm17359:NM_001142953:exon4:c.A533T:p.K178M	.	het	.	3	79449424	79449424	C	T	het	45.64	10
3	79481048	79481048	G	A	exonic	Fnip2	.	nonsynonymous SNV	Fnip2:NM_001162999:exon13:c.A2285T:p.Q762L	.	het	.	3	79481048	79481048	G	A	het	44.64	25
3	79481152	79481152	A	T	exonic	Fnip2	.	nonsynonymous SNV	Fnip2:NM_001162999:exon13:c.C2181A:p.D727E	.	het	.	3	79481152	79481152	A	T	het	22.64	20
3	79481154	79481154	T	G	exonic	Fnip2	.	nonsynonymous SNV	Fnip2:NM_001162999:exon13:c.G2179C:p.D727H	.	het	.	3	79481154	79481154	T	G	het	22.64	20
3	79488997	79488997	T	A	exonic	Fnip2	.	nonsynonymous SNV	Fnip2:NM_001162999:exon12:c.C1415T:p.A472V	.	het	.	3	79488997	79488997	T	A	het	57.64	11
3	82105811	82105811	T	A	exonic	Gucy1a1	.	nonsynonymous SNV	Gucy1a1:NM_001356987:exon6:c.C1523T:p.A508V,Gucy1a1:NM_001356988:exon6:c.C1523T:p.A508V,Gucy1a1:NM_021896:exon6:c.C1523T:p.A508V	.	het	.	3	82105811	82105811	T	A	het	199.64	36
3	82105812	82105812	G	A	exonic	Gucy1a1	.	nonsynonymous SNV	Gucy1a1:NM_001356987:exon6:c.G1522T:p.A508S,Gucy1a1:NM_001356988:exon6:c.G1522T:p.A508S,Gucy1a1:NM_021896:exon6:c.G1522T:p.A508S	.	het	.	3	82105812	82105812	G	A	het	199.64	36
3	82837273	82837273	A	G	exonic	Rbm46	.	nonsynonymous SNV	Rbm46:NM_001146328:exon5:c.G1562C:p.G521A	.	het	.	3	82837273	82837273	A	G	het	391.64	17
3	83031026	83031026	A	T	exonic	Fga	.	nonsynonymous SNV	Fga:NM_001111048:exon5:c.G707T:p.G236V,Fga:NM_010196:exon5:c.G707T:p.G236V	.	het	.	3	83031026	83031026	A	T	het	97.64	14
3	83031088	83031088	C	G	exonic	Fga	.	nonsynonymous SNV	Fga:NM_001111048:exon5:c.C769G:p.Q257E,Fga:NM_010196:exon5:c.C769G:p.Q257E	.	het	.	3	83031088	83031088	C	G	het	88.64	13
3	83031094	83031094	A	G	exonic	Fga	.	nonsynonymous SNV	Fga:NM_001111048:exon5:c.A775G:p.R259G,Fga:NM_010196:exon5:c.A775G:p.R259G	.	het	.	3	83031094	83031094	A	G	het	88.64	13
3	83238882	83238882	C	T	exonic	Dchs2	.	nonsynonymous SNV	Dchs2:NM_001357165:exon2:c.A2034T:p.L678F	.	het	.	3	83238882	83238882	C	T	het	85.64	18
3	83898534	83898534	A	C	exonic	Tmem131l	.	nonsynonymous SNV	Tmem131l:NM_172681:exon35:c.A4601G:p.Y1534C	.	het	.	3	83898534	83898534	A	C	het	102.64	18
3	86120547	86120547	G	T	exonic	Sh3d19	.	nonsynonymous SNV	Sh3d19:NM_001082414:exon18:c.C2381T:p.A794V,Sh3d19:NM_001374679:exon19:c.C2381T:p.A794V	.	het	.	3	86120547	86120547	G	T	het	58.64	19
3	86121151	86121151	T	C	exonic	Sh3d19	.	nonsynonymous SNV	Sh3d19:NM_001082414:exon19:c.A2584C:p.K862Q,Sh3d19:NM_001374679:exon20:c.A2584C:p.K862Q	.	het	.	3	86121151	86121151	T	C	het	70.64	42
3	86121152	86121152	A	G	exonic	Sh3d19	.	nonsynonymous SNV	Sh3d19:NM_001082414:exon19:c.A2585G:p.K862R,Sh3d19:NM_001374679:exon20:c.A2585G:p.K862R	.	het	.	3	86121152	86121152	A	G	het	70.64	42
3	86121158	86121158	C	G	exonic	Sh3d19	.	nonsynonymous SNV	Sh3d19:NM_001082414:exon19:c.A2591G:p.K864R,Sh3d19:NM_001374679:exon20:c.A2591G:p.K864R	.	het	.	3	86121158	86121158	C	G	het	94.64	34
3	86319577	86319577	C	T	exonic	Lrba	.	nonsynonymous SNV	Lrba:NM_001077687:exon16:c.A2021T:p.E674V,Lrba:NM_001077688:exon16:c.A2021T:p.E674V,Lrba:NM_030695:exon16:c.A2021T:p.E674V	.	het	.	3	86319577	86319577	C	T	het	47.64	40
3	86906083	86906083	G	A	exonic	Dclk2	.	nonsynonymous SNV	Dclk2:NM_001195496:exon2:c.G555T:p.E185D,Dclk2:NM_001195497:exon2:c.G555T:p.E185D,Dclk2:NM_001195498:exon2:c.G555T:p.E185D,Dclk2:NM_001195499:exon2:c.G555T:p.E185D,Dclk2:NM_001195500:exon2:c.G555T:p.E185D,Dclk2:NM_001357460:exon2:c.G555T:p.E185D,Dclk2:NM_027539:exon2:c.G555T:p.E185D	.	het	.	3	86906083	86906083	G	A	het	91.64	16
3	86920028	86920028	A	T	exonic	Dclk2	.	nonsynonymous SNV	Dclk2:NM_001195496:exon1:c.C143A:p.P48Q,Dclk2:NM_001195497:exon1:c.C143A:p.P48Q,Dclk2:NM_001195498:exon1:c.C143A:p.P48Q,Dclk2:NM_001195499:exon1:c.C143A:p.P48Q,Dclk2:NM_001195500:exon1:c.C143A:p.P48Q,Dclk2:NM_001357460:exon1:c.C143A:p.P48Q,Dclk2:NM_027539:exon1:c.C143A:p.P48Q	.	het	.	3	86920028	86920028	A	T	het	202.64	58
3	86920036	86920036	G	C	exonic	Dclk2	.	nonsynonymous SNV	Dclk2:NM_001195496:exon1:c.C135G:p.I45M,Dclk2:NM_001195497:exon1:c.C135G:p.I45M,Dclk2:NM_001195498:exon1:c.C135G:p.I45M,Dclk2:NM_001195499:exon1:c.C135G:p.I45M,Dclk2:NM_001195500:exon1:c.C135G:p.I45M,Dclk2:NM_001357460:exon1:c.C135G:p.I45M,Dclk2:NM_027539:exon1:c.C135G:p.I45M	.	het	.	3	86920036	86920036	G	C	het	584.64	67
3	87083157	87083157	A	C	exonic	Kirrel	.	nonsynonymous SNV	Kirrel:NM_001377046:exon15:c.A2276G:p.Q759R,Kirrel:NM_001170985:exon16:c.A2357G:p.Q786R,Kirrel:NM_130867:exon16:c.A2357G:p.Q786R	.	het	.	3	87083157	87083157	A	C	het	110.64	11
3	87083181	87083181	G	A	exonic	Kirrel	.	nonsynonymous SNV	Kirrel:NM_001377046:exon15:c.G2252T:p.G751V,Kirrel:NM_001170985:exon16:c.G2333T:p.G778V,Kirrel:NM_130867:exon16:c.G2333T:p.G778V	.	het	.	3	87083181	87083181	G	A	het	215.64	14
3	87252466	87252466	A	T	exonic	Fcrls	.	nonsynonymous SNV	Fcrls:NM_030707:exon7:c.C1480A:p.H494N	.	het	.	3	87252466	87252466	A	T	het	76.64	17
3	87252480	87252480	T	C	exonic	Fcrls	.	nonsynonymous SNV	Fcrls:NM_030707:exon7:c.C1466G:p.A489G	.	het	.	3	87252480	87252480	T	C	het	118.64	18
3	87252742	87252742	G	A	exonic	Fcrls	.	nonsynonymous SNV	Fcrls:NM_030707:exon7:c.G1204T:p.V402L	.	het	.	3	87252742	87252742	G	A	het	34.64	16
3	87560543	87560543	G	T	exonic	Etv3l	.	nonsynonymous SNV	Etv3l:NM_001370856:exon6:c.G1046T:p.W349L	.	het	.	3	87560543	87560543	G	T	het	112.64	13
3	87713241	87713241	A	C	exonic	Arhgef11	.	nonsynonymous SNV	Arhgef11:NM_001360195:exon16:c.T1280C:p.L427P,Arhgef11:NM_001003912:exon17:c.T1400C:p.L467P	.	het	.	3	87713241	87713241	A	C	het	52.64	17
3	87795104	87795104	0	T	exonic	Ntrk1	.	nonsynonymous SNV	Ntrk1:NM_001033124:exon1:c.G41A:p.R14H	.	het	.	3	87795104	87795104	-	T	het	89.60	16
3	87804497	87804497	A	G	exonic	Insrr	.	nonsynonymous SNV	Insrr:NM_011832:exon7:c.C1543G:p.L515V	.	het	.	3	87804497	87804497	A	G	het	83.64	20
3	87804524	87804524	T	C	exonic	Insrr	.	nonsynonymous SNV	Insrr:NM_011832:exon7:c.T1570C:p.S524P	.	het	.	3	87804524	87804524	T	C	het	25.64	17
3	87809548	87809548	C	A	exonic	Insrr	.	nonsynonymous SNV	Insrr:NM_011832:exon10:c.C1994A:p.T665N	.	het	.	3	87809548	87809548	C	A	het	25.64	16
3	87809556	87809556	G	T	exonic	Insrr	.	nonsynonymous SNV	Insrr:NM_011832:exon10:c.C2002T:p.H668Y	.	het	.	3	87809556	87809556	G	T	het	84.64	16
3	87809589	87809589	G	A	exonic	Insrr	.	nonsynonymous SNV	Insrr:NM_011832:exon10:c.C2035A:p.L679M	.	het	.	3	87809589	87809589	G	A	het	52.64	10
3	87948888	87948888	T	A	exonic	Crabp2	.	nonsynonymous SNV	Crabp2:NM_007759:exon1:c.T48A:p.F16L	.	het	.	3	87948888	87948888	T	A	het	52.64	10
3	88074592	88074592	C	T	exonic	Ttc24	.	nonsynonymous SNV	Ttc24:NM_172526:exon3:c.G166A:p.E56K	.	het	.	3	88074592	88074592	C	T	het	40.64	13
3	88074603	88074603	G	A	exonic	Ttc24	.	nonsynonymous SNV	Ttc24:NM_172526:exon3:c.C155T:p.P52L	.	het	.	3	88074603	88074603	G	A	het	106.64	15
3	88168070	88168070	A	T	exonic	Mef2d	.	nonsynonymous SNV	Mef2d:NM_001310593:exon10:c.C1235T:p.A412V,Mef2d:NM_133665:exon10:c.C1238T:p.A413V,Mef2d:NM_001310587:exon11:c.C1259T:p.A420V	.	het	.	3	88168070	88168070	A	T	het	52.64	18
3	88168104	88168104	C	G	exonic	Mef2d	.	nonsynonymous SNV	Mef2d:NM_001310593:exon10:c.C1269G:p.I423M,Mef2d:NM_133665:exon10:c.C1272G:p.I424M,Mef2d:NM_001310587:exon11:c.C1293G:p.I431M	.	het	.	3	88168104	88168104	C	G	het	169.64	16
3	88168105	88168105	T	C	exonic	Mef2d	.	nonsynonymous SNV	Mef2d:NM_001310593:exon10:c.A1270C:p.K424Q,Mef2d:NM_133665:exon10:c.A1273C:p.K425Q,Mef2d:NM_001310587:exon11:c.A1294C:p.K432Q	.	het	.	3	88168105	88168105	T	C	het	178.64	16
3	88254474	88254474	G	C	exonic	Rhbg	.	nonsynonymous SNV	Rhbg:NM_021375:exon1:c.A173G:p.Y58C	.	het	.	3	88254474	88254474	G	C	het	133.64	14
3	88254535	88254535	G	A	exonic	Rhbg	.	nonsynonymous SNV	Rhbg:NM_021375:exon1:c.G112T:p.D38Y	.	het	.	3	88254535	88254535	G	A	het	205.64	22
3	88254574	88254574	0	A	exonic	Rhbg	.	nonsynonymous SNV	Rhbg:NM_021375:exon1:c.C73T:p.L25F	.	het	.	3	88254574	88254574	-	A	het	32.60	24
3	88287145	88287145	C	A	exonic	Tsacc	.	nonsynonymous SNV	Tsacc:NM_001357024:exon3:c.A110T:p.N37I,Tsacc:NM_029801:exon3:c.A110T:p.N37I	.	het	.	3	88287145	88287145	C	A	het	30.64	16
3	88287164	88287164	T	C	exonic	Tsacc	.	nonsynonymous SNV	Tsacc:NM_001357024:exon3:c.T91G:p.Y31D,Tsacc:NM_029801:exon3:c.T91G:p.Y31D	.	het	.	3	88287164	88287164	T	C	het	79.64	16
3	88287165	88287165	C	T	exonic	Tsacc	.	nonsynonymous SNV	Tsacc:NM_001357024:exon3:c.T90A:p.S30R,Tsacc:NM_029801:exon3:c.T90A:p.S30R	.	het	.	3	88287165	88287165	C	T	het	79.64	16
3	88287214	88287214	A	C	exonic	Tsacc	.	nonsynonymous SNV	Tsacc:NM_001357024:exon3:c.A41G:p.K14R,Tsacc:NM_029801:exon3:c.A41G:p.K14R	.	het	.	3	88287214	88287214	A	C	het	130.64	14
3	88565229	88565229	C	T	exonic	Ubqln4	.	nonsynonymous SNV	Ubqln4:NM_033526:exon9:c.C1352T:p.S451F	.	het	.	3	88565229	88565229	C	T	het	258.64	12
3	88565321	88565321	T	C	exonic	Ubqln4	.	nonsynonymous SNV	Ubqln4:NM_033526:exon9:c.G1444C:p.V482L	.	het	.	3	88565321	88565321	T	C	het	205.64	24
3	88643154	88643154	T	C	exonic	Arhgef2	.	nonsynonymous SNV	Arhgef2:NM_001198912:exon17:c.G2026C:p.E676Q,Arhgef2:NM_001198913:exon17:c.G2020C:p.E674Q,Arhgef2:NM_001377126:exon17:c.G2083C:p.E695Q,Arhgef2:NM_008487:exon17:c.G2107C:p.E703Q,Arhgef2:NM_001198911:exon18:c.G2056C:p.E686Q	.	het	.	3	88643154	88643154	T	C	het	184.64	12
3	88726469	88726469	A	G	exonic	Rit1	.	nonsynonymous SNV	Rit1:NM_001163310:exon4:c.C319G:p.Q107E,Rit1:NM_009069:exon5:c.C427G:p.Q143E	.	het	.	3	88726469	88726469	A	G	het	144.64	23
3	88837371	88837371	G	C	exonic	Gon4l	.	nonsynonymous SNV	Gon4l:NM_001242372:exon2:c.A356C:p.D119A,Gon4l:NM_027389:exon2:c.A356C:p.D119A	.	het	.	3	88837371	88837371	G	C	het	184.64	12
3	88837415	88837415	T	A	exonic	Gon4l	.	nonsynonymous SNV	Gon4l:NM_001242372:exon2:c.G400A:p.V134I,Gon4l:NM_027389:exon2:c.G400A:p.V134I	.	het	.	3	88837415	88837415	T	A	het	87.64	20
3	88896488	88896488	T	C	exonic	Gon4l	.	nonsynonymous SNV	Gon4l:NM_027389:exon21:c.G4405C:p.D1469H,Gon4l:NM_001242372:exon22:c.G4456C:p.D1486H	.	het	.	3	88896488	88896488	T	C	het	82.64	15
3	88898935	88898935	T	A	exonic	Gon4l	.	nonsynonymous SNV	Gon4l:NM_027389:exon23:c.C4790A:p.A1597D,Gon4l:NM_001242372:exon24:c.C4841A:p.A1614D	.	het	.	3	88898935	88898935	T	A	het	72.64	10
3	88913648	88913648	A	C	exonic	Msto1	.	nonsynonymous SNV	Msto1:NM_144898:exon2:c.C139G:p.P47A	.	het	.	3	88913648	88913648	A	C	het	110.64	11
3	89175194	89175194	G	A	exonic	Clk2;Gm45927	.	nonsynonymous SNV	Gm45927:NM_001310017:exon9:c.T416A:p.I139K,Clk2:NM_001163432:exon10:c.T1094A:p.I365K,Gm45927:NM_001310016:exon10:c.T1100A:p.I367K,Clk2:NM_007712:exon10:c.T1097A:p.I366K	.	het	.	3	89175194	89175194	G	A	het	41.64	11
3	89175212	89175212	T	C	exonic	Clk2;Gm45927	.	nonsynonymous SNV	Gm45927:NM_001310017:exon9:c.A434C:p.E145A,Clk2:NM_001163432:exon10:c.A1112C:p.E371A,Gm45927:NM_001310016:exon10:c.A1118C:p.E373A,Clk2:NM_007712:exon10:c.A1115C:p.E372A	.	het	.	3	89175212	89175212	T	C	het	49.64	11
3	89175218	89175218	C	T	exonic	Clk2;Gm45927	.	nonsynonymous SNV	Gm45927:NM_001310017:exon9:c.A440T:p.Y147F,Clk2:NM_001163432:exon10:c.A1118T:p.Y373F,Gm45927:NM_001310016:exon10:c.A1124T:p.Y375F,Clk2:NM_007712:exon10:c.A1121T:p.Y374F	.	het	.	3	89175218	89175218	C	T	het	49.64	11
3	89207967	89207967	G	A	exonic	Gba	.	nonsynonymous SNV	Gba:NM_001077411:exon9:c.C1305A:p.F435L,Gba:NM_008094:exon10:c.C1305A:p.F435L	.	het	.	3	89207967	89207967	G	A	het	175.64	14
3	89219116	89219116	A	G	exonic	Thbs3	.	nonsynonymous SNV	Thbs3:NM_013691:exon6:c.A743G:p.D248G	.	het	.	3	89219116	89219116	A	G	het	280.64	24
3	89315520	89315520	G	A	exonic	Efna3	.	nonsynonymous SNV	Efna3:NM_001377116:exon4:c.A532T:p.I178F,Efna3:NM_001377120:exon4:c.A289T:p.I97F,Efna3:NM_001377121:exon4:c.A289T:p.I97F,Efna3:NM_001377117:exon5:c.A367T:p.I123F,Efna3:NM_001377118:exon5:c.A367T:p.I123F,Efna3:NM_001377119:exon5:c.A367T:p.I123F,Efna3:NM_010108:exon5:c.A610T:p.I204F	.	het	.	3	89315520	89315520	G	A	het	101.64	25
3	89373528	89373528	C	T	exonic	Dcst2	.	nonsynonymous SNV	Dcst2:NM_001370853:exon14:c.G2032T:p.G678C	.	het	.	3	89373528	89373528	C	T	het	25.64	19
3	89373543	89373543	G	A	exonic	Dcst2	.	nonsynonymous SNV	Dcst2:NM_001370853:exon14:c.G2047A:p.D683N	.	het	.	3	89373543	89373543	G	A	het	76.64	17
3	89373548	89373548	C	T	exonic	Dcst2	.	nonsynonymous SNV	Dcst2:NM_001370853:exon14:c.G2052T:p.K684N	.	het	.	3	89373548	89373548	C	T	het	76.64	17
3	89373549	89373549	G	A	exonic	Dcst2	.	nonsynonymous SNV	Dcst2:NM_001370853:exon14:c.T2053A:p.S685T	.	het	.	3	89373549	89373549	G	A	het	76.64	17
3	89373566	89373566	C	T	exonic	Dcst2	.	nonsynonymous SNV	Dcst2:NM_001370853:exon14:c.G2070T:p.E690D	.	het	.	3	89373566	89373566	C	T	het	64.64	13
3	89468551	89468551	G	A	exonic	Pmvk	.	nonsynonymous SNV	Pmvk:NM_001310640:exon4:c.C255A:p.N85K,Pmvk:NM_026784:exon5:c.C480A:p.N160K,Pmvk:NM_027348:exon5:c.C417A:p.N139K	.	het	.	3	89468551	89468551	G	A	het	178.64	13
3	89945011	89945011	A	G	exonic	Atp8b2	.	nonsynonymous SNV	Atp8b2:NM_001368650:exon22:c.G2737C:p.G913R,Atp8b2:NM_001081182:exon23:c.G2680C:p.G894R	.	het	.	3	89945011	89945011	A	G	het	352.64	15
3	90044901	90044901	G	A	exonic	Ubap2l	.	nonsynonymous SNV	Ubap2l:NM_001165983:exon3:c.A121T:p.M41L,Ubap2l:NM_001165984:exon3:c.A121T:p.M41L,Ubap2l:NM_001165985:exon3:c.A121T:p.M41L,Ubap2l:NM_001165986:exon3:c.A121T:p.M41L,Ubap2l:NM_001165987:exon3:c.A121T:p.M41L,Ubap2l:NM_001165988:exon3:c.A121T:p.M41L,Ubap2l:NM_001357307:exon3:c.A121T:p.M41L,Ubap2l:NM_028475:exon3:c.A121T:p.M41L,Ubap2l:NM_153489:exon3:c.A121T:p.M41L	.	het	.	3	90044901	90044901	G	A	het	265.64	14
3	90134636	90134636	C	T	exonic	Nup210l	.	nonsynonymous SNV	Nup210l:NM_029937:exon10:c.A1247T:p.H416L	.	het	.	3	90134636	90134636	C	T	het	52.64	10
3	90134638	90134638	T	C	exonic	Nup210l	.	nonsynonymous SNV	Nup210l:NM_029937:exon10:c.G1249C:p.V417L	.	het	.	3	90134638	90134638	T	C	het	52.64	10
3	90134639	90134639	G	A	exonic	Nup210l	.	nonsynonymous SNV	Nup210l:NM_029937:exon10:c.T1250A:p.V417E	.	het	.	3	90134639	90134639	G	A	het	52.64	10
3	90134692	90134692	A	G	exonic	Nup210l	.	nonsynonymous SNV	Nup210l:NM_029937:exon10:c.A1303G:p.S435G	.	het	.	3	90134692	90134692	A	G	het	52.64	10
3	90203739	90203739	T	C	exonic	Nup210l	.	nonsynonymous SNV	Nup210l:NM_029937:exon36:c.G4947C:p.Q1649H	.	het	.	3	90203739	90203739	T	C	het	335.64	13
3	90224848	90224848	G	A	exonic	Rab13	.	nonsynonymous SNV	Rab13:NM_001293741:exon7:c.G238A:p.A80T,Rab13:NM_026677:exon7:c.G481A:p.A161T	.	het	.	3	90224848	90224848	G	A	het	91.64	12
3	90224849	90224849	A	G	exonic	Rab13	.	nonsynonymous SNV	Rab13:NM_001293741:exon7:c.C239G:p.A80G,Rab13:NM_026677:exon7:c.C482G:p.A161G	.	het	.	3	90224849	90224849	A	G	het	91.64	12
3	90224858	90224858	T	A	exonic	Rab13	.	nonsynonymous SNV	Rab13:NM_001293741:exon7:c.C248A:p.S83Y,Rab13:NM_026677:exon7:c.C491A:p.S164Y	.	het	.	3	90224858	90224858	T	A	het	217.64	15
3	90224869	90224869	G	T	exonic	Rab13	.	nonsynonymous SNV	Rab13:NM_001293741:exon7:c.G259T:p.D87Y,Rab13:NM_026677:exon7:c.G502T:p.D168Y	.	het	.	3	90224869	90224869	G	T	het	331.64	19
3	90252203	90252203	A	G	exonic	Slc39a1	.	nonsynonymous SNV	Slc39a1:NM_013901:exon4:c.C836G:p.A279G	.	het	.	3	90252203	90252203	A	G	het	220.64	14
3	90252206	90252206	T	A	exonic	Slc39a1	.	nonsynonymous SNV	Slc39a1:NM_013901:exon4:c.C839A:p.A280D	.	het	.	3	90252206	90252206	T	A	het	220.64	14
3	90252263	90252263	T	A	exonic	Slc39a1	.	nonsynonymous SNV	Slc39a1:NM_013901:exon4:c.C896A:p.S299Y	.	het	.	3	90252263	90252263	T	A	het	106.64	11
3	90272259	90272259	A	C	exonic	Dennd4b	.	nonsynonymous SNV	Dennd4b:NM_001356483:exon13:c.T1823C:p.F608S,Dennd4b:NM_201407:exon13:c.T1856C:p.F619S	.	het	.	3	90272259	90272259	A	C	het	169.64	17
3	90272323	90272323	G	A	exonic	Dennd4b	.	nonsynonymous SNV	Dennd4b:NM_001356483:exon13:c.C1887A:p.F629L,Dennd4b:NM_201407:exon13:c.C1920A:p.F640L	.	het	.	3	90272323	90272323	G	A	het	109.64	21
3	90350457	90350457	A	G	exonic	Gatad2b	.	nonsynonymous SNV	Gatad2b:NM_001379656:exon5:c.C671G:p.S224C,Gatad2b:NM_001379657:exon5:c.C671G:p.S224C,Gatad2b:NM_139304:exon5:c.C671G:p.S224C,Gatad2b:NM_001379655:exon6:c.C671G:p.S224C	.	het	.	3	90350457	90350457	A	G	het	176.64	12
3	90692787	90692787	G	A	exonic	S100a9	.	nonsynonymous SNV	S100a9:NM_001281852:exon3:c.C301T:p.R101C,S100a9:NM_009114:exon3:c.C301T:p.R101C	.	het	.	3	90692787	90692787	G	A	het	22.64	26
3	91630620	91630620	C	T	exonic	Gm36323	.	nonsynonymous SNV	Gm36323:NM_001378707:exon1:c.G85A:p.V29I	.	het	.	3	91630620	91630620	C	T	het	73.64	18
3	92081728	92081728	A	G	exonic	Lor	.	nonsynonymous SNV	Lor:NM_008508:exon2:c.G250C:p.G84R	.	het	.	3	92081728	92081728	A	G	het	226.64	12
3	92081734	92081734	G	T	exonic	Lor	.	nonsynonymous SNV	Lor:NM_008508:exon2:c.G244A:p.G82S	.	het	.	3	92081734	92081734	G	T	het	226.64	12
3	92707642	92707642	A	G	exonic	Lce1e	.	nonsynonymous SNV	Lce1e:NM_026811:exon2:c.T397C:p.C133R	.	het	.	3	92707642	92707642	A	G	het	202.64	20
3	92823832	92823832	A	C	exonic	Kprp	.	nonsynonymous SNV	Kprp:NM_028629:exon2:c.A1910G:p.Q637R	.	het	.	3	92823832	92823832	A	C	het	79.64	10
3	92824022	92824022	0	A	exonic	Kprp	.	nonsynonymous SNV	Kprp:NM_028629:exon2:c.C1720T:p.P574S	.	het	.	3	92824022	92824022	-	A	het	46.60	10
3	92850267	92850267	T	C	exonic	Lce1l	.	nonsynonymous SNV	Lce1l:NM_028628:exon2:c.C283G:p.R95G	.	het	.	3	92850267	92850267	T	C	het	157.64	20
3	92850293	92850293	A	T	exonic	Lce1l	.	nonsynonymous SNV	Lce1l:NM_028628:exon2:c.G257A:p.S86N	.	het	.	3	92850293	92850293	A	T	het	169.64	16
3	92850337	92850337	0	C	exonic	Lce1l	.	nonsynonymous SNV	Lce1l:NM_028628:exon2:c.C213G:p.S71R	.	het	.	3	92850337	92850337	-	C	het	239.60	20
3	92850486	92850486	A	C	exonic	Lce1l	.	nonsynonymous SNV	Lce1l:NM_028628:exon2:c.C64G:p.P22A	.	het	.	3	92850486	92850486	A	C	het	343.64	25
3	93219894	93219894	A	G	exonic	Flg2	.	nonsynonymous SNV	Flg2:NM_001013804:exon7:c.T6106G:p.S2036A	.	het	.	3	93219894	93219894	A	G	het	188.64	19
3	93219904	93219904	T	A	exonic	Flg2	.	nonsynonymous SNV	Flg2:NM_001013804:exon7:c.G6116A:p.S2039N	.	het	.	3	93219904	93219904	T	A	het	25.64	19
3	93327884	93327884	T	G	exonic	Hrnr	.	nonsynonymous SNV	Hrnr:NM_133698:exon3:c.T5428G:p.Y1810D	.	het	.	3	93327884	93327884	T	G	het	81.64	11
3	93397577	93397577	G	C	exonic	Rptn	.	nonsynonymous SNV	Rptn:NM_009100:exon3:c.G2216C:p.R739P	.	het	.	3	93397577	93397577	G	C	het	253.64	18
3	93651948	93651948	T	C	exonic	Tdpoz2	.	nonsynonymous SNV	Tdpoz2:NM_001007222:exon1:c.T716G:p.F239C	.	het	.	3	93651948	93651948	T	C	het	68.64	13
3	93652021	93652021	G	A	exonic	Tdpoz2	.	nonsynonymous SNV	Tdpoz2:NM_001007222:exon1:c.G643T:p.A215S	.	het	.	3	93652021	93652021	G	A	het	144.64	10
3	93652344	93652344	G	T	exonic	Tdpoz2	.	nonsynonymous SNV	Tdpoz2:NM_001007222:exon1:c.G320A:p.S107N	.	het	.	3	93652344	93652344	G	T	het	86.64	17
3	93670385	93670385	G	A	exonic	Tdpoz1	.	nonsynonymous SNV	Tdpoz1:NM_148949:exon2:c.A1091T:p.Q364L	.	het	.	3	93670385	93670385	G	A	het	133.64	23
3	93670895	93670895	C	T	exonic	Tdpoz1	.	nonsynonymous SNV	Tdpoz1:NM_148949:exon2:c.T581A:p.V194E	.	het	.	3	93670895	93670895	C	T	het	271.64	16
3	93671003	93671003	T	C	exonic	Tdpoz1	.	nonsynonymous SNV	Tdpoz1:NM_148949:exon2:c.T473G:p.M158R	.	het	.	3	93671003	93671003	T	C	het	33.64	11
3	93938163	93938163	T	G	exonic	Tdpoz9	.	nonsynonymous SNV	Tdpoz9:NM_001163730:exon2:c.G609C:p.K203N	.	het	.	3	93938163	93938163	T	G	het	28.64	15
3	93938574	93938574	T	G	exonic	Tdpoz9	.	nonsynonymous SNV	Tdpoz9:NM_001163730:exon2:c.A198C:p.K66N	.	het	.	3	93938574	93938574	T	G	het	89.64	13
3	94423696	94423696	T	C	exonic	Tdrkh	.	nonsynonymous SNV	Tdrkh:NM_001357711:exon3:c.A126C:p.E42D,Tdrkh:NM_001357712:exon3:c.A126C:p.E42D,Tdrkh:NM_001357713:exon3:c.A126C:p.E42D,Tdrkh:NM_001357714:exon3:c.A126C:p.E42D,Tdrkh:NM_028307:exon3:c.A126C:p.E42D	.	het	.	3	94423696	94423696	T	C	het	217.64	15
3	94876669	94876669	T	G	exonic	Pogz	.	nonsynonymous SNV	Pogz:NM_001368812:exon11:c.C1474G:p.L492V,Pogz:NM_001368811:exon12:c.C1633G:p.L545V,Pogz:NM_001165948:exon13:c.C1924G:p.L642V,Pogz:NM_172683:exon13:c.C1951G:p.L651V	.	het	.	3	94876669	94876669	T	G	het	210.64	13
3	94879623	94879623	G	T	exonic	Pogz	.	nonsynonymous SNV	Pogz:NM_001368812:exon17:c.G3044T:p.G1015V,Pogz:NM_001368811:exon18:c.G3203T:p.G1068V,Pogz:NM_001165948:exon19:c.G3494T:p.G1165V,Pogz:NM_172683:exon19:c.G3521T:p.G1174V	.	het	.	3	94879623	94879623	G	T	het	77.64	16
3	94944437	94944437	A	T	exonic	Selenbp1	.	nonsynonymous SNV	Selenbp1:NM_009150:exon12:c.G1288T:p.D430Y	.	het	.	3	94944437	94944437	A	T	het	222.64	21
3	94959202	94959202	T	C	exonic	Rfx5	.	nonsynonymous SNV	Rfx5:NM_001355705:exon10:c.T1811C:p.V604A,Rfx5:NM_001355706:exon10:c.T1736C:p.V579A,Rfx5:NM_001355707:exon10:c.T1547C:p.V516A,Rfx5:NM_017395:exon10:c.T1811C:p.V604A	.	het	.	3	94959202	94959202	T	C	het	172.64	17
3	94959205	94959205	C	T	exonic	Rfx5	.	nonsynonymous SNV	Rfx5:NM_001355705:exon10:c.C1814T:p.T605I,Rfx5:NM_001355706:exon10:c.C1739T:p.T580I,Rfx5:NM_001355707:exon10:c.C1550T:p.T517I,Rfx5:NM_017395:exon10:c.C1814T:p.T605I	.	het	.	3	94959205	94959205	C	T	het	172.64	17
3	94996930	94996930	G	A	exonic	Pi4kb	.	nonsynonymous SNV	Pi4kb:NM_001293716:exon6:c.C708A:p.D236E,Pi4kb:NM_175356:exon7:c.C1659A:p.D553E,Pi4kb:NM_001293715:exon8:c.C1704A:p.D568E	.	het	.	3	94996930	94996930	G	A	het	40.64	10
3	95240766	95240766	T	C	exonic	Gm128	.	nonsynonymous SNV	Gm128:NM_001024841:exon1:c.T216G:p.D72E	.	het	.	3	95240766	95240766	T	C	het	52.64	10
3	95240767	95240767	G	A	exonic	Gm128	.	nonsynonymous SNV	Gm128:NM_001024841:exon1:c.A215T:p.D72V	.	het	.	3	95240767	95240767	G	A	het	52.64	10
3	95240782	95240782	A	G	exonic	Gm128	.	nonsynonymous SNV	Gm128:NM_001024841:exon1:c.G200C:p.R67T	.	het	.	3	95240782	95240782	A	G	het	161.64	12
3	95291053	95291053	A	G	exonic	Mindy1	.	nonsynonymous SNV	Mindy1:NM_133858:exon3:c.C485G:p.T162R,Mindy1:NM_199475:exon3:c.C485G:p.T162R	.	het	.	3	95291053	95291053	A	G	het	39.64	26
3	95506713	95506713	C	T	exonic	Ctsk	.	nonsynonymous SNV	Ctsk:NM_007802:exon6:c.A770T:p.Q257L	.	het	.	3	95506713	95506713	C	T	het	49.64	11
3	95617236	95617236	A	G	exonic	Golph3l	.	nonsynonymous SNV	Golph3l:NM_001177669:exon4:c.T608G:p.L203R,Golph3l:NM_001177670:exon5:c.T797G:p.L266R,Golph3l:NM_146133:exon5:c.T797G:p.L266R	.	het	.	3	95617236	95617236	A	G	het	91.64	25
3	95754432	95754432	A	G	exonic	Tars2	.	nonsynonymous SNV	Tars2:NM_001163617:exon2:c.A165C:p.L55F,Tars2:NM_001163618:exon2:c.A165C:p.L55F,Tars2:NM_001163619:exon2:c.A165C:p.L55F,Tars2:NM_027931:exon2:c.A165C:p.L55F	.	het	.	3	95754432	95754432	A	G	het	31.64	17
3	95774174	95774174	A	G	exonic	Rprd2	.	nonsynonymous SNV	Rprd2:NM_001368179:exon8:c.A1274C:p.N425T,Rprd2:NM_001368181:exon8:c.A1274C:p.N425T,Rprd2:NM_001081293:exon9:c.A1406C:p.N469T,Rprd2:NM_001368178:exon9:c.A1352C:p.N451T,Rprd2:NM_001368180:exon9:c.A1352C:p.N451T,Rprd2:NM_028328:exon9:c.A1352C:p.N451T	.	het	.	3	95774174	95774174	A	G	het	198.64	13
3	95774237	95774237	G	A	exonic	Rprd2	.	nonsynonymous SNV	Rprd2:NM_001368179:exon8:c.C1211T:p.P404L,Rprd2:NM_001368181:exon8:c.C1211T:p.P404L,Rprd2:NM_001081293:exon9:c.C1343T:p.P448L,Rprd2:NM_001368178:exon9:c.C1289T:p.P430L,Rprd2:NM_001368180:exon9:c.C1289T:p.P430L,Rprd2:NM_028328:exon9:c.C1289T:p.P430L	.	het	.	3	95774237	95774237	G	A	het	22.64	17
3	95780491	95780491	A	T	exonic	Rprd2	.	nonsynonymous SNV	Rprd2:NM_001368179:exon6:c.C716A:p.P239H,Rprd2:NM_001368181:exon6:c.C716A:p.P239H,Rprd2:NM_001081293:exon7:c.C848A:p.P283H,Rprd2:NM_001368178:exon7:c.C794A:p.P265H,Rprd2:NM_001368180:exon7:c.C794A:p.P265H,Rprd2:NM_028328:exon7:c.C794A:p.P265H	.	het	.	3	95780491	95780491	A	T	het	35.64	10
3	96033665	96033665	G	A	exonic	Vps45	.	nonsynonymous SNV	Vps45:NM_013841:exon11:c.G1263T:p.K421N	.	het	.	3	96033665	96033665	G	A	het	149.64	24
3	96033673	96033673	C	G	exonic	Vps45	.	nonsynonymous SNV	Vps45:NM_013841:exon11:c.T1255C:p.Y419H	.	het	.	3	96033673	96033673	C	G	het	175.64	29
3	96033675	96033675	C	A	exonic	Vps45	.	nonsynonymous SNV	Vps45:NM_013841:exon11:c.A1253T:p.K418M	.	het	.	3	96033675	96033675	C	A	het	175.64	29
3	96033725	96033725	C	T	exonic	Vps45	.	nonsynonymous SNV	Vps45:NM_013841:exon11:c.C1203A:p.N401K	.	het	.	3	96033725	96033725	C	T	het	52.64	25
3	96033726	96033726	A	G	exonic	Vps45	.	nonsynonymous SNV	Vps45:NM_013841:exon11:c.A1202C:p.N401T	.	het	.	3	96033726	96033726	A	G	het	94.64	26
3	96033729	96033729	C	T	exonic	Vps45	.	nonsynonymous SNV	Vps45:NM_013841:exon11:c.G1199A:p.S400N	.	het	.	3	96033729	96033729	C	T	het	262.64	30
3	96033748	96033748	C	A	exonic	Vps45	.	nonsynonymous SNV	Vps45:NM_013841:exon11:c.C1180T:p.H394Y	.	het	.	3	96033748	96033748	C	A	het	293.64	33
3	96152581	96152581	T	A	exonic	Otud7b	.	nonsynonymous SNV	Otud7b:NM_001025614:exon10:c.G1192A:p.G398S,Otud7b:NM_001025613:exon11:c.G1192A:p.G398S	.	het	.	3	96152581	96152581	T	A	het	184.64	11
3	96220793	96220793	G	A	exonic	H2ac20	.	nonsynonymous SNV	H2ac20:NM_175662:exon1:c.C52T:p.R18W	.	het	.	3	96220793	96220793	G	A	het	184.64	11
3	96220826	96220826	T	C	exonic	H2ac20	.	nonsynonymous SNV	H2ac20:NM_175662:exon1:c.C19G:p.Q7E	.	het	.	3	96220826	96220826	T	C	het	106.64	11
3	96527376	96527376	A	C	exonic	Hjv	.	nonsynonymous SNV	Hjv:NM_027126:exon3:c.G430C:p.E144Q	.	het	.	3	96527376	96527376	A	C	het	159.64	11
3	96527463	96527463	C	T	exonic	Hjv	.	nonsynonymous SNV	Hjv:NM_027126:exon3:c.A517T:p.N173Y	.	het	.	3	96527463	96527463	C	T	het	99.64	11
3	96598934	96598934	A	G	exonic	Ankrd34a	.	nonsynonymous SNV	Ankrd34a:NM_001024851:exon2:c.C1453G:p.Q485E	.	het	.	3	96598934	96598934	A	G	het	49.64	11
3	96702194	96702194	C	T	exonic	Pias3	.	nonsynonymous SNV	Pias3:NM_001165949:exon8:c.G931T:p.D311Y,Pias3:NM_146135:exon8:c.G904T:p.D302Y,Pias3:NM_018812:exon9:c.G826T:p.D276Y	.	het	.	3	96702194	96702194	C	T	het	23.64	14
3	96702204	96702204	T	C	exonic	Pias3	.	nonsynonymous SNV	Pias3:NM_001165949:exon8:c.G941C:p.S314T,Pias3:NM_146135:exon8:c.G914C:p.S305T,Pias3:NM_018812:exon9:c.G836C:p.S279T	.	het	.	3	96702204	96702204	T	C	het	233.64	19
3	96702207	96702207	A	G	exonic	Pias3	.	nonsynonymous SNV	Pias3:NM_001165949:exon8:c.A944G:p.E315G,Pias3:NM_146135:exon8:c.A917G:p.E306G,Pias3:NM_018812:exon9:c.A839G:p.E280G	.	het	.	3	96702207	96702207	A	G	het	233.64	19
3	96703868	96703868	G	A	exonic	Pias3	.	nonsynonymous SNV	Pias3:NM_001165949:exon11:c.T1409A:p.V470D,Pias3:NM_146135:exon11:c.T1382A:p.V461D,Pias3:NM_018812:exon12:c.T1304A:p.V435D	.	het	.	3	96703868	96703868	G	A	het	92.64	17
3	96719468	96719468	A	G	exonic	Polr3c	.	nonsynonymous SNV	Polr3c:NM_028925:exon6:c.T773C:p.M258T	.	het	.	3	96719468	96719468	A	G	het	121.64	10
3	96723643	96723643	G	A	exonic	Polr3c	.	nonsynonymous SNV	Polr3c:NM_028925:exon4:c.A460T:p.T154S	.	het	.	3	96723643	96723643	G	A	het	37.64	12
3	97050734	97050734	A	C	exonic	Gja5	.	nonsynonymous SNV	Gja5:NM_008121:exon2:c.G106C:p.V36L,Gja5:NM_001271628:exon3:c.G106C:p.V36L	.	het	.	3	97050734	97050734	A	C	het	48.64	19
3	98122065	98122065	T	C	exonic	Notch2	.	nonsynonymous SNV	Notch2:NM_010928:exon19:c.G3143C:p.R1048P	.	het	.	3	98122065	98122065	T	C	het	217.64	15
3	98122082	98122082	T	C	exonic	Notch2	.	nonsynonymous SNV	Notch2:NM_010928:exon19:c.G3160C:p.G1054R	.	het	.	3	98122082	98122082	T	C	het	88.64	13
3	98563396	98563396	C	T	exonic	Gm10681;Hsd3b4	.	nonsynonymous SNV	Hsd3b4:NM_001111336:exon2:c.C43A:p.L15I,Gm10681:NM_001270429:exon2:c.C43A:p.L15I,Hsd3b4:NM_008294:exon2:c.C43A:p.L15I	.	het	.	3	98563396	98563396	C	T	het	39.64	36
3	98711963	98711963	G	A	exonic	Hsd3b2	.	nonsynonymous SNV	Hsd3b2:NM_001359741:exon6:c.A665T:p.N222I,Hsd3b2:NM_153193:exon6:c.A665T:p.N222I	.	het	.	3	98711963	98711963	G	A	het	37.64	30
3	98712017	98712017	C	G	exonic	Hsd3b2	.	nonsynonymous SNV	Hsd3b2:NM_001359741:exon6:c.T611C:p.M204T,Hsd3b2:NM_153193:exon6:c.T611C:p.M204T	.	het	.	3	98712017	98712017	C	G	het	55.64	24
3	98712092	98712092	C	T	exonic	Hsd3b2	.	nonsynonymous SNV	Hsd3b2:NM_001359741:exon6:c.C536A:p.T179N,Hsd3b2:NM_153193:exon6:c.C536A:p.T179N	.	het	.	3	98712092	98712092	C	T	het	25.64	19
3	99216766	99216766	T	A	exonic	Wars2	.	nonsynonymous SNV	Wars2:NM_027462:exon6:c.T942A:p.F314L	.	het	.	3	99216766	99216766	T	A	het	307.64	15
3	99216767	99216767	C	T	exonic	Wars2	.	nonsynonymous SNV	Wars2:NM_027462:exon6:c.G943T:p.A315S	.	het	.	3	99216767	99216767	C	T	het	307.64	15
3	100138761	100138761	A	T	exonic	Wdr3	.	nonsynonymous SNV	Wdr3:NM_001355657:exon27:c.G2242A:p.E748K,Wdr3:NM_175552:exon27:c.G2755A:p.E919K	.	het	.	3	100138761	100138761	A	T	het	20.64	15
3	100138785	100138785	A	C	exonic	Wdr3	.	nonsynonymous SNV	Wdr3:NM_001355657:exon27:c.A2218G:p.K740E,Wdr3:NM_175552:exon27:c.A2731G:p.K911E	.	het	.	3	100138785	100138785	A	C	het	41.64	17
3	100138803	100138803	T	G	exonic	Wdr3	.	nonsynonymous SNV	Wdr3:NM_001355657:exon27:c.A2200C:p.K734Q,Wdr3:NM_175552:exon27:c.A2713C:p.K905Q	.	het	.	3	100138803	100138803	T	G	het	31.64	17
3	100138806	100138806	C	A	exonic	Wdr3	.	nonsynonymous SNV	Wdr3:NM_001355657:exon27:c.C2197T:p.L733F,Wdr3:NM_175552:exon27:c.C2710T:p.L904F	.	het	.	3	100138806	100138806	C	A	het	31.64	17
3	100170030	100170030	T	A	exonic	Gdap2	.	nonsynonymous SNV	Gdap2:NM_010269:exon2:c.G31A:p.V11M	.	het	.	3	100170030	100170030	T	A	het	88.64	13
3	100171005	100171005	G	A	exonic	Gdap2	.	nonsynonymous SNV	Gdap2:NM_010269:exon3:c.C284A:p.P95Q	.	het	.	3	100171005	100171005	G	A	het	49.64	30
3	102765243	102765243	A	G	exonic	Tspan2	.	nonsynonymous SNV	Tspan2:NM_001243132:exon7:c.T563G:p.V188G,Tspan2:NM_027533:exon7:c.T575G:p.V192G	.	het	.	3	102765243	102765243	A	G	het	24.64	15
3	102940909	102940909	T	G	exonic	Nr1h5	.	nonsynonymous SNV	Nr1h5:NM_198658:exon11:c.G1479C:p.M493I,Nr1h5:NM_201619:exon11:c.G1455C:p.M485I,Nr1h5:NM_201622:exon11:c.G1305C:p.M435I	.	het	.	3	102940909	102940909	T	G	het	58.64	19
3	102940935	102940935	A	G	exonic	Nr1h5	.	nonsynonymous SNV	Nr1h5:NM_198658:exon11:c.A1453C:p.K485Q,Nr1h5:NM_201619:exon11:c.A1429C:p.K477Q,Nr1h5:NM_201622:exon11:c.A1279C:p.K427Q	.	het	.	3	102940935	102940935	A	G	het	378.64	19
3	102940936	102940936	A	G	exonic	Nr1h5	.	nonsynonymous SNV	Nr1h5:NM_198658:exon11:c.G1452C:p.W484C,Nr1h5:NM_201619:exon11:c.G1428C:p.W476C,Nr1h5:NM_201622:exon11:c.G1278C:p.W426C	.	het	.	3	102940936	102940936	A	G	het	378.64	19
3	102940938	102940938	A	C	exonic	Nr1h5	.	nonsynonymous SNV	Nr1h5:NM_198658:exon11:c.T1450G:p.W484G,Nr1h5:NM_201619:exon11:c.T1426G:p.W476G,Nr1h5:NM_201622:exon11:c.T1276G:p.W426G	.	het	.	3	102940938	102940938	A	C	het	378.64	19
3	102940979	102940979	A	G	exonic	Nr1h5	.	nonsynonymous SNV	Nr1h5:NM_198658:exon11:c.T1409C:p.L470P,Nr1h5:NM_201619:exon11:c.T1385C:p.L462P,Nr1h5:NM_201622:exon11:c.T1235C:p.L412P	.	het	.	3	102940979	102940979	A	G	het	26.64	13
3	103152299	103152299	T	A	exonic	Dennd2c	.	nonsynonymous SNV	Dennd2c:NM_001356383:exon5:c.C214A:p.H72N,Dennd2c:NM_001384113:exon9:c.C1540A:p.H514N,Dennd2c:NM_177857:exon9:c.C1540A:p.H514N	.	het	.	3	103152299	103152299	T	A	het	94.64	11
3	103152301	103152301	A	G	exonic	Dennd2c	.	nonsynonymous SNV	Dennd2c:NM_001356383:exon5:c.T216G:p.H72Q,Dennd2c:NM_001384113:exon9:c.T1542G:p.H514Q,Dennd2c:NM_177857:exon9:c.T1542G:p.H514Q	.	het	.	3	103152301	103152301	A	G	het	94.64	11
3	103152332	103152332	A	T	exonic	Dennd2c	.	nonsynonymous SNV	Dennd2c:NM_001356383:exon5:c.A247T:p.R83W,Dennd2c:NM_001384113:exon9:c.A1573T:p.R525W,Dennd2c:NM_177857:exon9:c.A1573T:p.R525W	.	het	.	3	103152332	103152332	A	T	het	91.64	12
3	103152335	103152335	T	G	exonic	Dennd2c	.	nonsynonymous SNV	Dennd2c:NM_001356383:exon5:c.C250G:p.L84V,Dennd2c:NM_001384113:exon9:c.C1576G:p.L526V,Dennd2c:NM_177857:exon9:c.C1576G:p.L526V	.	het	.	3	103152335	103152335	T	G	het	91.64	12
3	103156073	103156073	T	A	exonic	Dennd2c	.	nonsynonymous SNV	Dennd2c:NM_001356383:exon8:c.T499A:p.S167T,Dennd2c:NM_001384113:exon12:c.T1825A:p.S609T,Dennd2c:NM_177857:exon12:c.T1825A:p.S609T	.	het	.	3	103156073	103156073	T	A	het	38.64	12
3	103156099	103156099	T	C	exonic	Dennd2c	.	nonsynonymous SNV	Dennd2c:NM_001356383:exon8:c.G525C:p.M175I,Dennd2c:NM_001384113:exon12:c.G1851C:p.M617I,Dennd2c:NM_177857:exon12:c.G1851C:p.M617I	.	het	.	3	103156099	103156099	T	C	het	34.64	13
3	103803716	103803716	G	C	exonic	Dclre1b	.	nonsynonymous SNV	Dclre1b:NM_001025312:exon3:c.A500G:p.Q167R,Dclre1b:NM_133865:exon4:c.A878G:p.Q293R	.	het	.	3	103803716	103803716	G	C	het	52.64	10
3	103808139	103808139	G	T	exonic	Dclre1b	.	nonsynonymous SNV	Dclre1b:NM_133865:exon2:c.T288A:p.D96E	.	het	.	3	103808139	103808139	G	T	het	82.64	11
3	104464296	104464296	A	G	exonic	Lrig2	.	nonsynonymous SNV	Lrig2:NM_001025067:exon15:c.T2090C:p.F697S,Lrig2:NM_001310698:exon15:c.T2090C:p.F697S	.	het	.	3	104464296	104464296	A	G	het	117.64	17
3	104464297	104464297	C	T	exonic	Lrig2	.	nonsynonymous SNV	Lrig2:NM_001025067:exon15:c.T2089A:p.F697I,Lrig2:NM_001310698:exon15:c.T2089A:p.F697I	.	het	.	3	104464297	104464297	C	T	het	117.64	17
3	104653168	104653168	A	T	exonic	Slc16a1	.	nonsynonymous SNV	Slc16a1:NM_009196:exon4:c.A788T:p.N263I	.	het	.	3	104653168	104653168	A	T	het	33.64	24
3	104653201	104653201	A	G	exonic	Slc16a1	.	nonsynonymous SNV	Slc16a1:NM_009196:exon4:c.T821G:p.L274W	.	het	.	3	104653201	104653201	A	G	het	73.64	18
3	104653203	104653203	G	A	exonic	Slc16a1	.	nonsynonymous SNV	Slc16a1:NM_009196:exon4:c.G823A:p.V275I	.	het	.	3	104653203	104653203	G	A	het	73.64	18
3	104834738	104834738	A	T	exonic	Capza1	.	nonsynonymous SNV	Capza1:NM_001355044:exon5:c.C286A:p.P96T,Capza1:NM_009797:exon6:c.C493A:p.P165T	.	het	.	3	104834738	104834738	A	T	het	197.64	15
3	105967186	105967186	C	G	exonic	Wdr77	.	nonsynonymous SNV	Wdr77:NM_027432:exon10:c.A893G:p.D298G	.	het	.	3	105967186	105967186	C	G	het	151.64	22
3	105967290	105967290	C	G	exonic	Wdr77	.	nonsynonymous SNV	Wdr77:NM_027432:exon10:c.C997G:p.P333A	.	het	.	3	105967290	105967290	C	G	het	57.64	15
3	106130945	106130945	C	T	exonic	Chia1	.	nonsynonymous SNV	Chia1:NM_023186:exon10:c.G1156T:p.A386S	.	het	.	3	106130945	106130945	C	T	het	41.64	11
3	106147870	106147870	T	C	exonic	Chil3	.	nonsynonymous SNV	Chil3:NM_009892:exon11:c.T1180G:p.C394G	.	het	.	3	106147870	106147870	T	C	het	412.64	40
3	106148860	106148860	A	C	exonic	Chil3	.	nonsynonymous SNV	Chil3:NM_009892:exon9:c.A977G:p.Y326C	.	het	.	3	106148860	106148860	A	C	het	679.64	92
3	106148878	106148878	G	A	exonic	Chil3	.	nonsynonymous SNV	Chil3:NM_009892:exon9:c.C959T:p.A320V	.	het	.	3	106148878	106148878	G	A	het	644.64	111
3	106148885	106148885	A	T	exonic	Chil3	.	nonsynonymous SNV	Chil3:NM_009892:exon9:c.T952A:p.W318R	.	het	.	3	106148885	106148885	A	T	het	811.64	134
3	106149843	106149843	A	G	exonic	Chil3	.	nonsynonymous SNV	Chil3:NM_009892:exon8:c.G784C:p.V262L	.	het	.	3	106149843	106149843	A	G	het	57.64	30
3	106202600	106202600	A	T	exonic	Chil4	.	nonsynonymous SNV	Chil4:NM_145126:exon10:c.G1096A:p.D366N	.	het	.	3	106202600	106202600	A	T	het	40.64	14
3	106210592	106210592	A	G	exonic	Chil4	.	nonsynonymous SNV	Chil4:NM_145126:exon5:c.A361C:p.K121Q	.	het	.	3	106210592	106210592	A	G	het	275.64	46
3	106492442	106492442	A	G	exonic	Dennd2d	.	nonsynonymous SNV	Dennd2d:NM_001093754:exon7:c.C650G:p.T217R,Dennd2d:NM_028110:exon7:c.C680G:p.T227R,Dennd2d:NM_001278941:exon8:c.C119G:p.T40R	.	het	.	3	106492442	106492442	A	G	het	67.64	24
3	106505204	106505204	G	C	exonic	Cept1	.	nonsynonymous SNV	Cept1:NM_001293694:exon7:c.T951G:p.C317W,Cept1:NM_001357818:exon7:c.T951G:p.C317W,Cept1:NM_001357819:exon7:c.T951G:p.C317W,Cept1:NM_133869:exon7:c.T951G:p.C317W	.	het	.	3	106505204	106505204	G	C	het	29.64	41
3	106768940	106768940	T	C	exonic	Cd53	.	nonsynonymous SNV	Cd53:NM_007651:exon3:c.A110G:p.Q37R	.	het	.	3	106768940	106768940	T	C	het	141.64	13
3	108204745	108204745	C	T	exonic	Atxn7l2	.	nonsynonymous SNV	Atxn7l2:NM_001289545:exon8:c.T1303A:p.Y435N,Atxn7l2:NM_175183:exon9:c.T1129A:p.Y377N	.	het	.	3	108204745	108204745	C	T	het	59.64	16
3	108204750	108204750	A	G	exonic	Atxn7l2	.	nonsynonymous SNV	Atxn7l2:NM_001289545:exon8:c.G1298C:p.C433S,Atxn7l2:NM_175183:exon9:c.G1124C:p.C375S	.	het	.	3	108204750	108204750	A	G	het	37.64	15
3	108204777	108204777	G	A	exonic	Atxn7l2	.	nonsynonymous SNV	Atxn7l2:NM_001289545:exon8:c.C1271T:p.S424F,Atxn7l2:NM_175183:exon9:c.C1097T:p.S366F	.	het	.	3	108204777	108204777	G	A	het	91.64	16
3	108204819	108204819	G	A	exonic	Atxn7l2	.	nonsynonymous SNV	Atxn7l2:NM_001289545:exon8:c.G1229T:p.G410V,Atxn7l2:NM_175183:exon9:c.G1055T:p.G352V	.	het	.	3	108204819	108204819	G	A	het	122.64	17
3	108204822	108204822	G	A	exonic	Atxn7l2	.	nonsynonymous SNV	Atxn7l2:NM_001289545:exon8:c.G1226T:p.G409V,Atxn7l2:NM_175183:exon9:c.G1052T:p.G351V	.	het	.	3	108204822	108204822	G	A	het	122.64	17
3	108208455	108208455	T	C	exonic	Atxn7l2	.	nonsynonymous SNV	Atxn7l2:NM_001289545:exon2:c.A178G:p.T60A,Atxn7l2:NM_175183:exon3:c.A4G:p.T2A	.	het	.	3	108208455	108208455	T	C	het	138.64	14
3	108208486	108208486	C	T	exonic	Atxn7l2	.	nonsynonymous SNV	Atxn7l2:NM_001289545:exon2:c.C147A:p.N49K	.	het	.	3	108208486	108208486	C	T	het	88.64	13
3	108208487	108208487	A	G	exonic	Atxn7l2	.	nonsynonymous SNV	Atxn7l2:NM_001289545:exon2:c.A146C:p.N49T	.	het	.	3	108208487	108208487	A	G	het	88.64	13
3	108752230	108752230	T	C	exonic	Aknad1	.	nonsynonymous SNV	Aknad1:NM_177859:exon2:c.T559C:p.S187P	.	het	.	3	108752230	108752230	T	C	het	32.64	11
3	108752540	108752540	T	C	exonic	Aknad1	.	nonsynonymous SNV	Aknad1:NM_177859:exon2:c.A869C:p.N290T	.	het	.	3	108752540	108752540	T	C	het	67.64	20
3	108752544	108752544	C	T	exonic	Aknad1	.	nonsynonymous SNV	Aknad1:NM_177859:exon2:c.A873T:p.K291N	.	het	.	3	108752544	108752544	C	T	het	67.64	20
3	108752551	108752551	C	T	exonic	Aknad1	.	nonsynonymous SNV	Aknad1:NM_177859:exon2:c.G880T:p.V294F	.	het	.	3	108752551	108752551	C	T	het	67.64	20
3	108771962	108771962	G	C	exonic	Aknad1	.	nonsynonymous SNV	Aknad1:NM_177859:exon7:c.T1408C:p.S470P	.	het	.	3	108771962	108771962	G	C	het	49.64	11
3	108771968	108771968	T	C	exonic	Aknad1	.	nonsynonymous SNV	Aknad1:NM_177859:exon7:c.A1414C:p.S472R	.	het	.	3	108771968	108771968	T	C	het	49.64	11
3	108771970	108771970	A	G	exonic	Aknad1	.	nonsynonymous SNV	Aknad1:NM_177859:exon7:c.C1416G:p.S472R	.	het	.	3	108771970	108771970	A	G	het	49.64	11
3	108771976	108771976	A	G	exonic	Aknad1	.	nonsynonymous SNV	Aknad1:NM_177859:exon7:c.T1422G:p.H474Q	.	het	.	3	108771976	108771976	A	G	het	49.64	11
3	108771984	108771984	C	T	exonic	Aknad1	.	nonsynonymous SNV	Aknad1:NM_177859:exon7:c.C1430T:p.T477I	.	het	.	3	108771984	108771984	C	T	het	49.64	11
3	108771987	108771987	A	G	exonic	Aknad1	.	nonsynonymous SNV	Aknad1:NM_177859:exon7:c.T1433G:p.L478R	.	het	.	3	108771987	108771987	A	G	het	46.64	12
3	108771990	108771990	C	G	exonic	Aknad1	.	nonsynonymous SNV	Aknad1:NM_177859:exon7:c.C1436G:p.P479R	.	het	.	3	108771990	108771990	C	G	het	46.64	12
3	113353794	113353794	A	G	exonic	Amy2a2;Amy2a3;Amy2a4;Amy2a5	.	nonsynonymous SNV	Amy2a5:NM_001042711:exon4:c.T572C:p.V191A,Amy2a4:NM_001160150:exon4:c.T572C:p.V191A,Amy2a3:NM_001160151:exon4:c.T572C:p.V191A,Amy2a2:NM_001160152:exon4:c.T572C:p.V191A	.	het	.	3	113353794	113353794	A	G	het	241.64	22
3	113353795	113353795	A	G	exonic	Amy2a2;Amy2a3;Amy2a4;Amy2a5	.	nonsynonymous SNV	Amy2a5:NM_001042711:exon4:c.G571C:p.V191L,Amy2a4:NM_001160150:exon4:c.G571C:p.V191L,Amy2a3:NM_001160151:exon4:c.G571C:p.V191L,Amy2a2:NM_001160152:exon4:c.G571C:p.V191L	.	het	.	3	113353795	113353795	A	G	het	241.64	22
3	113353807	113353807	C	T	exonic	Amy2a2;Amy2a3;Amy2a4;Amy2a5	.	nonsynonymous SNV	Amy2a5:NM_001042711:exon4:c.G559A:p.V187I,Amy2a4:NM_001160150:exon4:c.G559A:p.V187I,Amy2a3:NM_001160151:exon4:c.G559A:p.V187I,Amy2a2:NM_001160152:exon4:c.G559A:p.V187I	.	het	.	3	113353807	113353807	C	T	het	67.64	20
3	113569907	113569907	T	C	exonic	Amy1	.	nonsynonymous SNV	Amy1:NM_001110505:exon2:c.T106G:p.W36G,Amy1:NM_007446:exon2:c.T106G:p.W36G	.	het	.	3	113569907	113569907	T	C	het	90.64	13
3	114105417	114105417	T	C	exonic	Col11a1	.	nonsynonymous SNV	Col11a1:NM_007729:exon14:c.A1594C:p.M532L	.	het	.	3	114105417	114105417	T	C	het	80.64	22
3	116568847	116568847	C	A	exonic	Lrrc39	.	nonsynonymous SNV	Lrrc39:NM_001379629:exon3:c.G202A:p.E68K,Lrrc39:NM_001379630:exon3:c.G202A:p.E68K,Lrrc39:NM_027321:exon3:c.G202A:p.E68K,Lrrc39:NM_175413:exon3:c.G202A:p.E68K	.	het	.	3	116568847	116568847	C	A	het	109.64	14
3	116791073	116791073	G	A	exonic	Agl	.	nonsynonymous SNV	Agl:NM_001081326:exon5:c.G597T:p.Q199H,Agl:NM_001362367:exon5:c.G597T:p.Q199H	.	het	.	3	116791073	116791073	G	A	het	115.64	15
3	121510235	121510235	T	G	exonic	Slc44a3	.	nonsynonymous SNV	Slc44a3:NM_145394:exon8:c.T851C:p.M284T	.	het	.	3	121510235	121510235	T	G	het	184.64	11
3	122105367	122105367	G	A	exonic	Abca4	.	nonsynonymous SNV	Abca4:NM_007378:exon14:c.C1997A:p.S666Y	.	het	.	3	122105367	122105367	G	A	het	75.64	13
3	123364956	123364956	G	C	exonic	Sec24d	.	nonsynonymous SNV	Sec24d:NM_027135:exon23:c.A3094C:p.N1032H	.	het	.	3	123364956	123364956	G	C	het	48.64	19
3	126929775	126929775	T	C	exonic	Ank2	.	nonsynonymous SNV	Ank2:NM_001034168:exon8:c.T2551G:p.Y851D,Ank2:NM_178655:exon23:c.T2902G:p.Y968D,Ank2:NM_001327939:exon44:c.T11452G:p.Y3818D,Ank2:NM_001327938:exon46:c.T11698G:p.Y3900D	.	het	.	3	126929775	126929775	T	C	het	244.64	11
3	129280455	129280455	C	A	exonic	Enpep	.	nonsynonymous SNV	Enpep:NM_007934:exon17:c.A2442T:p.L814F	.	het	.	3	129280455	129280455	C	A	het	126.64	21
3	129280493	129280493	T	C	exonic	Enpep	.	nonsynonymous SNV	Enpep:NM_007934:exon17:c.T2404G:p.S802A	.	het	.	3	129280493	129280493	T	C	het	883.64	33
3	129280532	129280532	C	T	exonic	Enpep	.	nonsynonymous SNV	Enpep:NM_007934:exon17:c.G2365A:p.A789T	.	het	.	3	129280532	129280532	C	T	het	61.64	22
3	129280544	129280544	C	T	exonic	Enpep	.	nonsynonymous SNV	Enpep:NM_007934:exon17:c.T2353A:p.S785T	.	het	.	3	129280544	129280544	C	T	het	61.64	22
3	129865364	129865364	T	C	exonic	Cfi	.	nonsynonymous SNV	Cfi:NM_001329552:exon9:c.G967C:p.E323Q,Cfi:NM_007686:exon9:c.G970C:p.E324Q	.	het	.	3	129865364	129865364	T	C	het	113.64	12
3	131583116	131583116	G	C	exonic	Papss1	.	nonsynonymous SNV	Papss1:NM_011863:exon4:c.G441C:p.E147D,Papss1:NM_001289477:exon5:c.G378C:p.E126D,Papss1:NM_001289478:exon5:c.G378C:p.E126D,Papss1:NM_001289479:exon6:c.G234C:p.E78D	.	het	.	3	131583116	131583116	G	C	het	47.64	15
3	131585162	131585162	T	C	exonic	Papss1	.	nonsynonymous SNV	Papss1:NM_011863:exon5:c.A665C:p.E222A,Papss1:NM_001289477:exon6:c.A602C:p.E201A,Papss1:NM_001289478:exon6:c.A602C:p.E201A,Papss1:NM_001289479:exon7:c.A458C:p.E153A	.	het	.	3	131585162	131585162	T	C	het	55.64	28
3	132724794	132724794	A	G	exonic	Tbck	.	nonsynonymous SNV	Tbck:NM_001163455:exon11:c.T950G:p.L317R	.	het	.	3	132724794	132724794	A	G	het	213.64	23
3	132724796	132724796	G	T	exonic	Tbck	.	nonsynonymous SNV	Tbck:NM_001163455:exon11:c.G952T:p.A318S	.	het	.	3	132724796	132724796	G	T	het	103.64	23
3	134240695	134240695	A	G	exonic	Cxxc4	.	nonsynonymous SNV	Cxxc4:NM_001004367:exon3:c.A1036G:p.K346E	.	het	.	3	134240695	134240695	A	G	het	100.64	24
3	134932138	134932138	C	T	exonic	Tacr3	.	nonsynonymous SNV	Tacr3:NM_021382:exon5:c.C1055T:p.A352V	.	het	.	3	134932138	134932138	C	T	het	169.64	16
3	134932286	134932286	A	G	exonic	Tacr3	.	nonsynonymous SNV	Tacr3:NM_021382:exon5:c.C1203G:p.D401E	.	het	.	3	134932286	134932286	A	G	het	297.64	18
3	135233047	135233047	T	C	exonic	Cenpe	.	nonsynonymous SNV	Cenpe:NM_173762:exon16:c.G1639C:p.E547Q	.	het	.	3	135233047	135233047	T	C	het	68.64	14
3	135618939	135618939	C	A	exonic	Nfkb1	.	nonsynonymous SNV	Nfkb1:NM_008689:exon8:c.A427T:p.T143S	.	het	.	3	135618939	135618939	C	A	het	70.64	12
3	136325906	136325906	C	A	exonic	Bank1	.	nonsynonymous SNV	Bank1:NM_001033350:exon1:c.A34T:p.T12S,Bank1:NM_001310749:exon1:c.A34T:p.T12S	.	het	.	3	136325906	136325906	C	A	het	70.64	15
3	138108977	138108977	T	C	exonic	Mttp	.	nonsynonymous SNV	Mttp:NM_008642:exon11:c.T1536G:p.D512E,Mttp:NM_001163457:exon13:c.T1581G:p.D527E,Mttp:NM_001355051:exon14:c.T1536G:p.D512E,Mttp:NM_001355052:exon15:c.T1536G:p.D512E	.	het	.	3	138108977	138108977	T	C	het	64.64	17
3	138223739	138223739	G	A	exonic	Adh7	.	nonsynonymous SNV	Adh7:NM_009626:exon4:c.G268A:p.V90I	.	het	.	3	138223739	138223739	G	A	het	166.64	17
3	138223742	138223742	T	C	exonic	Adh7	.	nonsynonymous SNV	Adh7:NM_009626:exon4:c.A271C:p.I91L	.	het	.	3	138223742	138223742	T	C	het	166.64	17
3	142303380	142303380	G	A	exonic	Pdlim5	.	nonsynonymous SNV	Pdlim5:NM_001190857:exon8:c.A653T:p.K218I,Pdlim5:NM_019809:exon8:c.A962T:p.K321I,Pdlim5:NM_022554:exon9:c.A668T:p.K223I,Pdlim5:NM_001190853:exon10:c.A593T:p.K198I	.	het	.	3	142303380	142303380	G	A	het	67.64	20
3	142303419	142303419	A	C	exonic	Pdlim5	.	nonsynonymous SNV	Pdlim5:NM_001190857:exon8:c.A614G:p.E205G,Pdlim5:NM_019809:exon8:c.A923G:p.E308G,Pdlim5:NM_022554:exon9:c.A629G:p.E210G,Pdlim5:NM_001190853:exon10:c.A554G:p.E185G	.	het	.	3	142303419	142303419	A	C	het	58.64	24
3	142611517	142611517	C	A	exonic	Gbp2b	.	nonsynonymous SNV	Gbp2b:NM_010259:exon10:c.C1633A:p.Q545K	.	het	.	3	142611517	142611517	C	A	het	75.64	13
3	142734619	142734619	A	G	exonic	Kyat3	.	nonsynonymous SNV	Kyat3:NM_001293560:exon11:c.C1103G:p.P368R,Kyat3:NM_173763:exon11:c.C998G:p.P333R	.	het	.	3	142734619	142734619	A	G	het	38.64	24
3	144437623	144437623	G	T	exonic	Hs2st1	.	nonsynonymous SNV	Hs2st1:NM_001355234:exon5:c.T658A:p.F220I,Hs2st1:NM_011828:exon5:c.T658A:p.F220I	.	het	.	3	144437623	144437623	G	T	het	206.64	44
3	144437679	144437679	A	G	exonic	Hs2st1	.	nonsynonymous SNV	Hs2st1:NM_001355234:exon5:c.G602C:p.C201S,Hs2st1:NM_011828:exon5:c.G602C:p.C201S	.	het	.	3	144437679	144437679	A	G	het	163.64	33
3	144748466	144748466	A	G	exonic	Clca3a1	.	nonsynonymous SNV	Clca3a1:NM_009899:exon9:c.A1402C:p.S468R	.	het	.	3	144748466	144748466	A	G	het	46.64	12
3	146001823	146001823	T	C	exonic	Syde2	.	nonsynonymous SNV	Syde2:NM_001166064:exon3:c.A2317C:p.S773R	.	het	.	3	146001823	146001823	T	C	het	98.64	24
3	146002005	146002005	T	A	exonic	Syde2	.	nonsynonymous SNV	Syde2:NM_001166064:exon3:c.C2499A:p.N833K	.	het	.	3	146002005	146002005	T	A	het	89.64	23
3	146002120	146002120	G	T	exonic	Syde2	.	nonsynonymous SNV	Syde2:NM_001166064:exon3:c.C2614T:p.P872S	.	het	.	3	146002120	146002120	G	T	het	49.64	26
3	146002126	146002126	G	T	exonic	Syde2	.	nonsynonymous SNV	Syde2:NM_001166064:exon3:c.C2620T:p.P874S	.	het	.	3	146002126	146002126	G	T	het	46.64	27
3	146002153	146002153	A	C	exonic	Syde2	.	nonsynonymous SNV	Syde2:NM_001166064:exon3:c.G2647C:p.G883R	.	het	.	3	146002153	146002153	A	C	het	55.64	30
3	146002292	146002292	A	G	exonic	Syde2	.	nonsynonymous SNV	Syde2:NM_001166064:exon3:c.A2786G:p.N929S	.	het	.	3	146002292	146002292	A	G	het	29.64	18
3	146493691	146493691	G	A	exonic	Spata1	.	nonsynonymous SNV	Spata1:NM_001316756:exon2:c.G17T:p.S6I,Spata1:NM_001370604:exon2:c.G17T:p.S6I,Spata1:NM_027617:exon2:c.G17T:p.S6I	.	het	.	3	146493691	146493691	G	A	het	139.64	19
3	146521380	146521380	T	G	exonic	Rpf1	.	nonsynonymous SNV	Rpf1:NM_027332:exon1:c.A17C:p.E6A,Rpf1:NM_027371:exon1:c.A17C:p.E6A	.	het	.	3	146521380	146521380	T	G	het	281.64	12
3	146521384	146521384	C	T	exonic	Rpf1	.	nonsynonymous SNV	Rpf1:NM_027332:exon1:c.G13A:p.G5S,Rpf1:NM_027371:exon1:c.G13A:p.G5S	.	het	.	3	146521384	146521384	C	T	het	281.64	12
3	146521388	146521388	T	A	exonic	Rpf1	.	nonsynonymous SNV	Rpf1:NM_027332:exon1:c.G9T:p.K3N,Rpf1:NM_027371:exon1:c.G9T:p.K3N	.	het	.	3	146521388	146521388	T	A	het	32.64	11
3	146624549	146624549	T	C	exonic	Uox	.	nonsynonymous SNV	Uox:NM_009474:exon5:c.G531C:p.Q177H	.	het	.	3	146624549	146624549	T	C	het	40.64	14
3	146624552	146624552	A	G	exonic	Uox	.	nonsynonymous SNV	Uox:NM_009474:exon5:c.C534G:p.F178L	.	het	.	3	146624552	146624552	A	G	het	40.64	14
3	151745491	151745491	T	A	exonic	Ifi44	.	nonsynonymous SNV	Ifi44:NM_001370771:exon5:c.G822T:p.Q274H,Ifi44:NM_133871:exon5:c.G822T:p.Q274H	.	het	.	3	151745491	151745491	T	A	het	97.64	18
3	152427337	152427337	T	C	exonic	Zzz3	.	nonsynonymous SNV	Zzz3:NM_001355673:exon3:c.T31C:p.S11P,Zzz3:NM_001080755:exon4:c.T31C:p.S11P,Zzz3:NM_001287139:exon4:c.T31C:p.S11P	.	het	.	3	152427337	152427337	T	C	het	66.64	13
3	152427377	152427377	T	C	exonic	Zzz3	.	nonsynonymous SNV	Zzz3:NM_001355673:exon3:c.A71C:p.N24T,Zzz3:NM_001080755:exon4:c.A71C:p.N24T,Zzz3:NM_001287139:exon4:c.A71C:p.N24T	.	het	.	3	152427377	152427377	T	C	het	40.64	11
3	152427571	152427571	A	T	exonic	Zzz3	.	nonsynonymous SNV	Zzz3:NM_001355673:exon3:c.A265T:p.S89C,Zzz3:NM_001080755:exon4:c.A265T:p.S89C,Zzz3:NM_001287139:exon4:c.A265T:p.S89C	.	het	.	3	152427571	152427571	A	T	het	31.64	17
3	152427572	152427572	A	T	exonic	Zzz3	.	nonsynonymous SNV	Zzz3:NM_001355673:exon3:c.G266T:p.S89I,Zzz3:NM_001080755:exon4:c.G266T:p.S89I,Zzz3:NM_001287139:exon4:c.G266T:p.S89I	.	het	.	3	152427572	152427572	A	T	het	31.64	17
3	152427584	152427584	A	T	exonic	Zzz3	.	nonsynonymous SNV	Zzz3:NM_001355673:exon3:c.G278T:p.R93I,Zzz3:NM_001080755:exon4:c.G278T:p.R93I,Zzz3:NM_001287139:exon4:c.G278T:p.R93I	.	het	.	3	152427584	152427584	A	T	het	37.64	15
3	152427592	152427592	A	G	exonic	Zzz3	.	nonsynonymous SNV	Zzz3:NM_001355673:exon3:c.T286G:p.S96A,Zzz3:NM_001080755:exon4:c.T286G:p.S96A,Zzz3:NM_001287139:exon4:c.T286G:p.S96A	.	het	.	3	152427592	152427592	A	G	het	58.64	17
3	152427628	152427628	A	G	exonic	Zzz3	.	nonsynonymous SNV	Zzz3:NM_001355673:exon3:c.C322G:p.L108V,Zzz3:NM_001080755:exon4:c.C322G:p.L108V,Zzz3:NM_001287139:exon4:c.C322G:p.L108V	.	het	.	3	152427628	152427628	A	G	het	59.64	13
3	152427701	152427701	C	T	exonic	Zzz3	.	nonsynonymous SNV	Zzz3:NM_001355673:exon3:c.C395T:p.A132V,Zzz3:NM_001080755:exon4:c.C395T:p.A132V,Zzz3:NM_001287139:exon4:c.C395T:p.A132V	.	het	.	3	152427701	152427701	C	T	het	81.64	11
3	154856567	154856567	A	C	exonic	Tnni3k	.	nonsynonymous SNV	Tnni3k:NM_177066:exon21:c.A2072G:p.K691R	.	het	.	3	154856567	154856567	A	C	het	28.64	15
3	154856622	154856622	T	A	exonic	Tnni3k	.	nonsynonymous SNV	Tnni3k:NM_177066:exon21:c.G2017T:p.A673S	.	het	.	3	154856622	154856622	T	A	het	43.64	13
3	154856624	154856624	C	T	exonic	Tnni3k	.	nonsynonymous SNV	Tnni3k:NM_177066:exon21:c.C2015A:p.A672E	.	het	.	3	154856624	154856624	C	T	het	43.64	13
3	154969232	154969232	A	T	exonic	Tnni3k	.	nonsynonymous SNV	Tnni3k:NM_177066:exon7:c.C655A:p.L219M	.	het	.	3	154969232	154969232	A	T	het	48.64	18
3	158052899	158052899	T	G	exonic	Lrrc40	.	nonsynonymous SNV	Lrrc40:NM_001289525:exon5:c.T286G:p.L96V,Lrrc40:NM_001359763:exon6:c.T571G:p.L191V,Lrrc40:NM_001289524:exon7:c.T286G:p.L96V,Lrrc40:NM_024194:exon7:c.T940G:p.L314V	.	het	.	3	158052899	158052899	T	G	het	22.64	20
3	158052900	158052900	A	G	exonic	Lrrc40	.	nonsynonymous SNV	Lrrc40:NM_001289525:exon5:c.T287G:p.L96W,Lrrc40:NM_001359763:exon6:c.T572G:p.L191W,Lrrc40:NM_001289524:exon7:c.T287G:p.L96W,Lrrc40:NM_024194:exon7:c.T941G:p.L314W	.	het	.	3	158052900	158052900	A	G	het	22.64	20
3	158054611	158054611	C	T	exonic	Lrrc40	.	nonsynonymous SNV	Lrrc40:NM_001289525:exon6:c.G354T:p.L118F,Lrrc40:NM_001359763:exon7:c.G639T:p.L213F,Lrrc40:NM_001289524:exon8:c.G354T:p.L118F,Lrrc40:NM_024194:exon8:c.G1008T:p.L336F	.	het	.	3	158054611	158054611	C	T	het	124.64	24
3	158175206	158175206	C	T	exonic	Lrrc7	.	nonsynonymous SNV	Lrrc7:NM_001370781:exon17:c.T1691A:p.L564Q,Lrrc7:NM_001370782:exon17:c.T1691A:p.L564Q,Lrrc7:NM_001081358:exon18:c.T1592A:p.L531Q,Lrrc7:NM_001291452:exon18:c.T1592A:p.L531Q,Lrrc7:NM_001291453:exon18:c.T1592A:p.L531Q	.	het	.	3	158175206	158175206	C	T	het	147.64	61
3	158175247	158175247	A	G	exonic	Lrrc7	.	nonsynonymous SNV	Lrrc7:NM_001370781:exon17:c.G1650C:p.Q550H,Lrrc7:NM_001370782:exon17:c.G1650C:p.Q550H,Lrrc7:NM_001081358:exon18:c.G1551C:p.Q517H,Lrrc7:NM_001291452:exon18:c.G1551C:p.Q517H,Lrrc7:NM_001291453:exon18:c.G1551C:p.Q517H	.	het	.	3	158175247	158175247	A	G	het	217.04	29
3	159520968	159520968	A	G	exonic	Depdc1a	.	nonsynonymous SNV	Depdc1a:NM_001172092:exon7:c.T911G:p.L304W,Depdc1a:NM_001172093:exon7:c.T911G:p.L304W,Depdc1a:NM_029523:exon7:c.T911G:p.L304W	.	het	.	3	159520968	159520968	A	G	het	127.64	15
3	159523153	159523153	G	C	exonic	Depdc1a	.	nonsynonymous SNV	Depdc1a:NM_001172092:exon8:c.T1541C:p.L514S,Depdc1a:NM_029523:exon8:c.T1541C:p.L514S	.	het	.	3	159523153	159523153	G	C	het	40.64	14
4	3172168	3172168	T	C	exonic	Vmn1r2	.	nonsynonymous SNV	Vmn1r2:NM_001167534:exon1:c.T86C:p.L29P	.	het	.	4	3172168	3172168	T	C	het	30.64	10
4	3172752	3172752	T	C	exonic	Vmn1r2	.	nonsynonymous SNV	Vmn1r2:NM_001167534:exon1:c.T670C:p.Y224H	.	het	.	4	3172752	3172752	T	C	het	30.64	22
4	3185050	3185050	G	T	exonic	Vmn1r3	.	nonsynonymous SNV	Vmn1r3:NM_001167535:exon1:c.C256A:p.L86I	.	het	.	4	3185050	3185050	G	T	het	67.64	13
4	11516945	11516945	T	C	exonic	Virma	.	nonsynonymous SNV	Virma:NM_001081183:exon9:c.T2138C:p.I713T	.	het	.	4	11516945	11516945	T	C	het	205.64	24
4	11544936	11544936	T	A	exonic	Virma	.	nonsynonymous SNV	Virma:NM_001347055:exon21:c.T4744A:p.S1582T,Virma:NM_001081183:exon22:c.T4894A:p.S1632T	.	het	.	4	11544936	11544936	T	A	het	149.64	19
4	42970191	42970191	T	G	exonic	1700022I11Rik	.	nonsynonymous SNV	1700022I11Rik:NM_026088:exon1:c.T177G:p.D59E	.	het	.	4	42970191	42970191	T	G	het	160.64	12
4	61301331	61301331	A	C	exonic	Mup14;Mup2	.	nonsynonymous SNV	Mup2:NM_001286096:exon4:c.C292G:p.H98D,Mup2:NM_001045550:exon5:c.C475G:p.H159D,Mup14:NM_001199999:exon5:c.C475G:p.H159D,Mup2:NM_008647:exon5:c.C475G:p.H159D	.	het	.	4	61301331	61301331	A	C	het	239.64	30
4	61301356	61301356	C	A	exonic	Mup14;Mup2	.	nonsynonymous SNV	Mup2:NM_001286096:exon4:c.A267T:p.E89D,Mup2:NM_001045550:exon5:c.A450T:p.E150D,Mup14:NM_001199999:exon5:c.A450T:p.E150D,Mup2:NM_008647:exon5:c.A450T:p.E150D	.	het	.	4	61301356	61301356	C	A	het	166.64	27
4	61516918	61516918	C	T	exonic	Mup16	.	nonsynonymous SNV	Mup16:NM_001199936:exon5:c.G439A:p.D147N	.	het	.	4	61516918	61516918	C	T	het	504.64	43
4	61516941	61516941	A	T	exonic	Mup16	.	nonsynonymous SNV	Mup16:NM_001199936:exon5:c.G416A:p.G139D	.	het	.	4	61516941	61516941	A	T	het	94.64	26
4	61517294	61517294	T	G	exonic	Mup16	.	nonsynonymous SNV	Mup16:NM_001199936:exon4:c.T404C:p.M135T	.	het	.	4	61517294	61517294	T	G	het	49.64	27
4	61673470	61673470	A	T	exonic	Mup18	.	nonsynonymous SNV	Mup18:NM_001199333:exon2:c.T218A:p.L73H	.	het	.	4	61673470	61673470	A	T	het	188.64	13
4	62086807	62086807	C	T	exonic	Mup3	.	nonsynonymous SNV	Mup3:NM_001039544:exon2:c.C235A:p.H79N	.	het	.	4	62086807	62086807	C	T	het	96.64	85
4	62087173	62087173	A	T	exonic	Mup3	.	nonsynonymous SNV	Mup3:NM_001039544:exon1:c.T59A:p.I20N	.	het	.	4	62087173	62087173	A	T	het	391.64	87
4	62149403	62149403	G	A	exonic	Mup21	.	nonsynonymous SNV	Mup21:NM_001009550:exon3:c.G258T:p.M86I	.	het	.	4	62149403	62149403	G	A	het	268.64	18
4	62419364	62419364	A	G	exonic	Prpf4	.	nonsynonymous SNV	Prpf4:NM_027297:exon10:c.T1021G:p.C341G	.	het	.	4	62419364	62419364	A	G	het	163.64	18
4	66404103	66404103	G	A	exonic	Astn2	.	nonsynonymous SNV	Astn2:NM_019514:exon1:c.G258T:p.W86C,Astn2:NM_207109:exon1:c.G258T:p.W86C	.	het	.	4	66404103	66404103	G	A	het	172.64	15
4	72852230	72852230	C	T	exonic	Aldoart1	.	nonsynonymous SNV	Aldoart1:NM_001199270:exon1:c.T340A:p.F114I	.	het	.	4	72852230	72852230	C	T	het	54.64	16
4	72852545	72852545	C	T	exonic	Aldoart1	.	nonsynonymous SNV	Aldoart1:NM_001199270:exon1:c.T25A:p.S9T	.	het	.	4	72852545	72852545	C	T	het	103.64	23
4	73403477	73403477	G	A	exonic	Gm11487	.	nonsynonymous SNV	Gm11487:NM_001013393:exon3:c.G320T:p.R107L	.	het	.	4	73403477	73403477	G	A	het	130.64	14
4	73403480	73403480	G	A	exonic	Gm11487	.	nonsynonymous SNV	Gm11487:NM_001013393:exon3:c.C317T:p.P106L	.	het	.	4	73403480	73403480	G	A	het	130.64	14
4	73610964	73610964	T	C	exonic	Gm11236;Gm11237;Gm11239;Gm38423	.	nonsynonymous SNV	Gm38423:NM_001256481:exon5:c.A582C:p.E194D,Gm11239:NM_001277487:exon5:c.A582C:p.E194D,Gm11236:NM_001277531:exon5:c.A582C:p.E194D,Gm11237:NM_001277575:exon5:c.A582C:p.E194D	.	het	.	4	73610964	73610964	T	C	het	26.64	13
4	73626064	73626064	G	A	exonic	Gm11236;Gm11237;Gm11239;Gm38423	.	nonsynonymous SNV	Gm38423:NM_001256481:exon5:c.T578A:p.V193D,Gm11239:NM_001277487:exon5:c.T578A:p.V193D,Gm11236:NM_001277531:exon5:c.T578A:p.V193D,Gm11237:NM_001277575:exon5:c.T578A:p.V193D	.	het	.	4	73626064	73626064	G	A	het	177.64	31
4	73626214	73626214	A	T	exonic	Gm11236;Gm11237;Gm11239;Gm38423	.	nonsynonymous SNV	Gm38423:NM_001256481:exon5:c.G728T:p.R243I,Gm11239:NM_001277487:exon5:c.G728T:p.R243I,Gm11236:NM_001277531:exon5:c.G728T:p.R243I,Gm11237:NM_001277575:exon5:c.G728T:p.R243I	.	het	.	4	73626214	73626214	A	T	het	34.64	31
4	73626215	73626215	G	C	exonic	Gm11236;Gm11237;Gm11239;Gm38423	.	nonsynonymous SNV	Gm38423:NM_001256481:exon5:c.A729C:p.R243S,Gm11239:NM_001277487:exon5:c.A729C:p.R243S,Gm11236:NM_001277531:exon5:c.A729C:p.R243S,Gm11237:NM_001277575:exon5:c.A729C:p.R243S	.	het	.	4	73626215	73626215	G	C	het	34.64	31
4	73626217	73626217	T	G	exonic	Gm11236;Gm11237;Gm11239;Gm38423	.	nonsynonymous SNV	Gm38423:NM_001256481:exon5:c.A731G:p.E244G,Gm11239:NM_001277487:exon5:c.A731G:p.E244G,Gm11236:NM_001277531:exon5:c.A731G:p.E244G,Gm11237:NM_001277575:exon5:c.A731G:p.E244G	.	het	.	4	73626217	73626217	T	G	het	34.64	31
4	73626264	73626264	G	A	exonic	Gm11236;Gm11237;Gm11239;Gm38423	.	nonsynonymous SNV	Gm38423:NM_001256481:exon5:c.G778A:p.E260K,Gm11239:NM_001277487:exon5:c.G778A:p.E260K,Gm11236:NM_001277531:exon5:c.G778A:p.E260K,Gm11237:NM_001277575:exon5:c.G778A:p.E260K	.	het	.	4	73626264	73626264	G	A	het	229.64	26
4	73626266	73626266	C	T	exonic	Gm11236;Gm11237;Gm11239;Gm38423	.	nonsynonymous SNV	Gm38423:NM_001256481:exon5:c.A780T:p.E260D,Gm11239:NM_001277487:exon5:c.A780T:p.E260D,Gm11236:NM_001277531:exon5:c.A780T:p.E260D,Gm11237:NM_001277575:exon5:c.A780T:p.E260D	.	het	.	4	73626266	73626266	C	T	het	229.64	26
4	73717682	73717682	G	C	exonic	Rasef	.	nonsynonymous SNV	Rasef:NM_001017427:exon18:c.T1870G:p.C624G	.	het	.	4	73717682	73717682	G	C	het	36.64	25
4	73889621	73889621	C	T	exonic	Gm11757;Gm11758;Gm13871	.	nonsynonymous SNV	Gm11757:NM_001085538:exon3:c.C209A:p.S70Y,Gm11758:NM_001097978:exon3:c.C209A:p.S70Y,Gm13871:NM_001177578:exon3:c.C209A:p.S70Y	.	het	.	4	73889621	73889621	C	T	het	91.64	12
4	73889622	73889622	C	G	exonic	Gm11757;Gm11758;Gm13871	.	nonsynonymous SNV	Gm11757:NM_001085538:exon3:c.T208C:p.S70P,Gm11758:NM_001097978:exon3:c.T208C:p.S70P,Gm13871:NM_001177578:exon3:c.T208C:p.S70P	.	het	.	4	73889622	73889622	C	G	het	91.64	12
4	73889625	73889625	A	G	exonic	Gm11757;Gm11758;Gm13871	.	nonsynonymous SNV	Gm11757:NM_001085538:exon3:c.A205C:p.K69Q,Gm11758:NM_001097978:exon3:c.A205C:p.K69Q,Gm13871:NM_001177578:exon3:c.A205C:p.K69Q	.	het	.	4	73889625	73889625	A	G	het	91.64	12
4	73889633	73889633	T	C	exonic	Gm11757;Gm11758;Gm13871	.	nonsynonymous SNV	Gm11757:NM_001085538:exon3:c.C197G:p.A66G,Gm11758:NM_001097978:exon3:c.C197G:p.A66G,Gm13871:NM_001177578:exon3:c.C197G:p.A66G	.	het	.	4	73889633	73889633	T	C	het	96.64	14
4	73889648	73889648	C	T	exonic	Gm11757;Gm11758;Gm13871	.	nonsynonymous SNV	Gm11757:NM_001085538:exon3:c.G182A:p.G61D,Gm11758:NM_001097978:exon3:c.G182A:p.G61D,Gm13871:NM_001177578:exon3:c.G182A:p.G61D	.	het	.	4	73889648	73889648	C	T	het	37.64	12
4	73942826	73942826	A	T	exonic	2310002L09Rik	.	nonsynonymous SNV	2310002L09Rik:NM_027104:exon2:c.G536A:p.G179E,2310002L09Rik:NM_027981:exon2:c.G536A:p.G179E	.	het	.	4	73942826	73942826	A	T	het	238.64	32
4	74377639	74377639	A	G	exonic	Kdm4c	.	nonsynonymous SNV	Kdm4c:NM_001356561:exon18:c.A2389G:p.T797A,Kdm4c:NM_001172095:exon19:c.A2665G:p.T889A,Kdm4c:NM_144787:exon19:c.A2614G:p.T872A	.	het	.	4	74377639	74377639	A	G	het	40.64	11
4	76246782	76246782	G	T	exonic	Ptprd	.	nonsynonymous SNV	Ptprd:NM_001352628:exon3:c.G202A:p.G68R,Ptprd:NM_001352629:exon3:c.G202A:p.G68R,Ptprd:NM_001352630:exon3:c.G202A:p.G68R,Ptprd:NM_001368992:exon3:c.G202A:p.G68R,Ptprd:NM_001368993:exon3:c.G202A:p.G68R,Ptprd:NM_001368991:exon12:c.G202A:p.G68R,Ptprd:NM_011211:exon12:c.G202A:p.G68R	.	het	.	4	76246782	76246782	G	T	het	229.64	11
4	80953581	80953581	G	T	exonic	Lurap1l	.	nonsynonymous SNV	Lurap1l:NM_026821:exon2:c.G310T:p.D104Y	.	het	.	4	80953581	80953581	G	T	het	214.64	16
4	80953584	80953584	T	C	exonic	Lurap1l	.	nonsynonymous SNV	Lurap1l:NM_026821:exon2:c.G313C:p.V105L	.	het	.	4	80953584	80953584	T	C	het	214.64	16
4	80953590	80953590	C	T	exonic	Lurap1l	.	nonsynonymous SNV	Lurap1l:NM_026821:exon2:c.C319T:p.L107F	.	het	.	4	80953590	80953590	C	T	het	25.64	16
4	81320353	81320353	A	T	exonic	Mpdz	.	nonsynonymous SNV	Mpdz:NM_001305286:exon25:c.T3587A:p.I1196K,Mpdz:NM_010820:exon25:c.T3587A:p.I1196K,Mpdz:NM_001305284:exon26:c.T3629A:p.I1210K	.	het	.	4	81320353	81320353	A	T	het	30.64	11
4	83418053	83418053	G	A	exonic	Snapc3	.	nonsynonymous SNV	Snapc3:NM_001358795:exon1:c.G301A:p.G101S,Snapc3:NM_029949:exon1:c.G301A:p.G101S	.	het	.	4	83418053	83418053	G	A	het	261.06	14
4	83451286	83451286	A	G	exonic	Snapc3	.	nonsynonymous SNV	Snapc3:NM_029949:exon8:c.T1050G:p.C350W	.	het	.	4	83451286	83451286	A	G	het	109.64	21
4	83451296	83451296	T	C	exonic	Snapc3	.	nonsynonymous SNV	Snapc3:NM_029949:exon8:c.A1060C:p.K354Q	.	het	.	4	83451296	83451296	T	C	het	115.64	19
4	83604053	83604053	T	C	exonic	Ccdc171	.	nonsynonymous SNV	Ccdc171:NM_001355378:exon9:c.A953C:p.Q318P	.	het	.	4	83604053	83604053	T	C	het	133.64	10
4	87226920	87226920	A	G	exonic	Slc24a2	.	nonsynonymous SNV	Slc24a2:NM_001110240:exon1:c.A896C:p.N299T,Slc24a2:NM_172426:exon2:c.A896C:p.N299T	.	het	.	4	87226920	87226920	A	G	het	53.64	18
4	87227613	87227613	T	A	exonic	Slc24a2	.	nonsynonymous SNV	Slc24a2:NM_001110240:exon1:c.G203T:p.R68I,Slc24a2:NM_172426:exon2:c.G203T:p.R68I	.	het	.	4	87227613	87227613	T	A	het	22.64	13
4	87227752	87227752	A	T	exonic	Slc24a2	.	nonsynonymous SNV	Slc24a2:NM_001110240:exon1:c.T64A:p.F22I,Slc24a2:NM_172426:exon2:c.T64A:p.F22I	.	het	.	4	87227752	87227752	A	T	het	63.64	13
4	96339171	96339171	A	C	exonic	Cyp2j11	.	nonsynonymous SNV	Cyp2j11:NM_001004141:exon4:c.T607G:p.F203V	.	het	.	4	96339171	96339171	A	C	het	23.64	14
4	96339859	96339859	C	A	exonic	Cyp2j11	.	nonsynonymous SNV	Cyp2j11:NM_001004141:exon3:c.G522T:p.E174D	.	het	.	4	96339859	96339859	C	A	het	31.64	17
4	96339878	96339878	G	C	exonic	Cyp2j11	.	nonsynonymous SNV	Cyp2j11:NM_001004141:exon3:c.T503G:p.L168R	.	het	.	4	96339878	96339878	G	C	het	127.64	15
4	96348369	96348369	T	C	exonic	Cyp2j11	.	nonsynonymous SNV	Cyp2j11:NM_001004141:exon1:c.C199G:p.H67D	.	het	.	4	96348369	96348369	T	C	het	48.64	18
4	96525963	96525963	C	T	exonic	Cyp2j6	.	nonsynonymous SNV	Cyp2j6:NM_010008:exon7:c.G1064A:p.R355K	.	het	.	4	96525963	96525963	C	T	het	301.64	17
4	96525965	96525965	C	T	exonic	Cyp2j6	.	nonsynonymous SNV	Cyp2j6:NM_010008:exon7:c.T1062A:p.D354E	.	het	.	4	96525965	96525965	C	T	het	301.64	17
4	100412039	100412039	A	C	exonic	Ror1	.	nonsynonymous SNV	Ror1:NM_013845:exon7:c.G1073C:p.G358A	.	het	.	4	100412039	100412039	A	C	het	53.64	18
4	101774218	101774218	T	A	exonic	Lepr	.	nonsynonymous SNV	Lepr:NM_001122899:exon13:c.G1924A:p.E642K,Lepr:NM_010704:exon13:c.G1924A:p.E642K,Lepr:NM_146146:exon13:c.G1924A:p.E642K	.	het	.	4	101774218	101774218	T	A	het	61.64	22
4	101774219	101774219	A	G	exonic	Lepr	.	nonsynonymous SNV	Lepr:NM_001122899:exon13:c.A1925G:p.E642G,Lepr:NM_010704:exon13:c.A1925G:p.E642G,Lepr:NM_146146:exon13:c.A1925G:p.E642G	.	het	.	4	101774219	101774219	A	G	het	61.64	22
4	101782717	101782717	C	A	exonic	Lepr	.	nonsynonymous SNV	Lepr:NM_001122899:exon15:c.T2379A:p.F793L,Lepr:NM_010704:exon15:c.T2379A:p.F793L,Lepr:NM_146146:exon15:c.T2379A:p.F793L	.	het	.	4	101782717	101782717	C	A	het	37.64	15
4	103231254	103231254	T	A	exonic	4921539E11Rik	.	nonsynonymous SNV	4921539E11Rik:NM_001163494:exon8:c.C754T:p.R252C,4921539E11Rik:NM_027612:exon9:c.C1057T:p.R353C	.	het	.	4	103231254	103231254	T	A	het	41.64	14
4	106680730	106680730	C	G	exonic	Mroh7	.	nonsynonymous SNV	Mroh7:NM_001126487:exon24:c.A3748C:p.S1250R	.	het	.	4	106680730	106680730	C	G	het	334.64	31
4	106680748	106680748	T	C	exonic	Mroh7	.	nonsynonymous SNV	Mroh7:NM_001126487:exon24:c.T3730G:p.S1244A	.	het	.	4	106680748	106680748	T	C	het	325.64	31
4	106733990	106733990	A	T	exonic	Fam151a	.	nonsynonymous SNV	Fam151a:NM_146149:exon1:c.G29T:p.S10I	.	het	.	4	106733990	106733990	A	T	het	34.64	16
4	106758321	106758321	A	C	exonic	Acot11	.	nonsynonymous SNV	Acot11:NM_001347159:exon8:c.A932G:p.N311S,Acot11:NM_025590:exon8:c.A872G:p.N291S	.	het	.	4	106758321	106758321	A	C	het	125.64	10
4	107634682	107634682	C	A	exonic	Glis1	.	nonsynonymous SNV	Glis1:NM_147221:exon11:c.T2306A:p.F769Y	.	het	.	4	107634682	107634682	C	A	het	277.64	25
4	107634700	107634700	G	A	exonic	Glis1	.	nonsynonymous SNV	Glis1:NM_147221:exon11:c.T2324A:p.F775Y	.	het	.	4	107634700	107634700	G	A	het	166.64	17
4	107634701	107634701	A	G	exonic	Glis1	.	nonsynonymous SNV	Glis1:NM_147221:exon11:c.T2325G:p.F775L	.	het	.	4	107634701	107634701	A	G	het	166.64	17
4	107869059	107869059	G	T	exonic	Lrp8	.	nonsynonymous SNV	Lrp8:NM_001369054:exon15:c.A1367T:p.D456V,Lrp8:NM_001369053:exon16:c.A1367T:p.D456V,Lrp8:NM_001080926:exon17:c.A2306T:p.D769V,Lrp8:NM_001369051:exon17:c.A2219T:p.D740V,Lrp8:NM_001369052:exon17:c.A1367T:p.D456V,Lrp8:NM_053073:exon18:c.A2684T:p.D895V	.	het	.	4	107869059	107869059	G	T	het	52.64	17
4	108205243	108205243	A	G	exonic	Zyg11a	.	nonsynonymous SNV	Zyg11a:NM_001167936:exon3:c.A360C:p.K120N	.	het	.	4	108205243	108205243	A	G	het	114.64	11
4	108338185	108338185	G	C	exonic	Coa7	.	nonsynonymous SNV	Coa7:NM_027250:exon3:c.G310C:p.G104R	.	het	.	4	108338185	108338185	G	C	het	129.64	28
4	108338479	108338479	G	C	exonic	Coa7	.	nonsynonymous SNV	Coa7:NM_027250:exon3:c.A604C:p.K202Q	.	het	.	4	108338479	108338479	G	C	het	111.64	18
4	108338549	108338549	A	G	exonic	Coa7	.	nonsynonymous SNV	Coa7:NM_027250:exon3:c.T674G:p.V225G	.	het	.	4	108338549	108338549	A	G	het	41.64	19
4	108644374	108644374	0	T	exonic	Zfyve9	.	nonsynonymous SNV	Zfyve9:NM_183300:exon16:c.G1744A:p.E582K,Zfyve9:NM_001347163:exon17:c.G3817A:p.E1273K,Zfyve9:NM_001384118:exon17:c.G3817A:p.E1273K	.	het	.	4	108644374	108644374	-	T	het	125.60	10
4	108826116	108826116	A	G	exonic	Btf3l4	.	nonsynonymous SNV	Btf3l4:NM_001356361:exon3:c.T152C:p.I51T,Btf3l4:NM_027453:exon3:c.T152C:p.I51T	.	het	.	4	108826116	108826116	A	G	het	203.64	17
4	108826122	108826122	A	C	exonic	Btf3l4	.	nonsynonymous SNV	Btf3l4:NM_001356361:exon3:c.A146G:p.N49S,Btf3l4:NM_027453:exon3:c.A146G:p.N49S	.	het	.	4	108826122	108826122	A	C	het	166.64	17
4	110211577	110211577	C	G	exonic	Elavl4	.	nonsynonymous SNV	Elavl4:NM_001038698:exon5:c.G583C:p.G195R,Elavl4:NM_001163397:exon5:c.G592C:p.G198R,Elavl4:NM_001163399:exon5:c.G598C:p.G200R,Elavl4:NM_001347178:exon5:c.G583C:p.G195R,Elavl4:NM_010488:exon5:c.G598C:p.G200R,Elavl4:NM_001357190:exon6:c.G577C:p.G193R	.	het	.	4	110211577	110211577	C	G	het	52.64	18
4	111890498	111890498	G	C	exonic	Slc5a9	.	nonsynonymous SNV	Slc5a9:NM_145551:exon8:c.A884G:p.Q295R	.	het	.	4	111890498	111890498	G	C	het	109.64	17
4	111893236	111893236	G	A	exonic	Slc5a9	.	nonsynonymous SNV	Slc5a9:NM_145551:exon5:c.G424T:p.G142W	.	het	.	4	111893236	111893236	G	A	het	54.64	20
4	111893585	111893585	T	G	exonic	Slc5a9	.	nonsynonymous SNV	Slc5a9:NM_145551:exon4:c.G323C:p.W108S	.	het	.	4	111893585	111893585	T	G	het	63.64	15
4	111893678	111893678	T	C	exonic	Slc5a9	.	nonsynonymous SNV	Slc5a9:NM_145551:exon4:c.C230G:p.A77G	.	het	.	4	111893678	111893678	T	C	het	28.64	18
4	111898600	111898600	T	C	exonic	Slc5a9	.	nonsynonymous SNV	Slc5a9:NM_145551:exon2:c.A100G:p.I34V	.	het	.	4	111898600	111898600	T	C	het	72.64	20
4	111898627	111898627	C	T	exonic	Slc5a9	.	nonsynonymous SNV	Slc5a9:NM_145551:exon2:c.C73A:p.P25T	.	het	.	4	111898627	111898627	C	T	het	199.64	21
4	112898152	112898152	C	T	exonic	Skint6	.	nonsynonymous SNV	Skint6:NM_001103199:exon29:c.T2227A:p.W743R	.	het	.	4	112898152	112898152	C	T	het	25.64	19
4	113096588	113096588	A	T	exonic	Skint6	.	nonsynonymous SNV	Skint6:NM_001103199:exon15:c.C1378A:p.Q460K	.	het	.	4	113096588	113096588	A	T	het	52.64	10
4	113848500	113848500	T	C	exonic	Skint5	.	nonsynonymous SNV	Skint5:NM_001167876:exon16:c.T1458G:p.I486M,Skint5:NM_001167878:exon16:c.T1458G:p.I486M	.	het	.	4	113848500	113848500	T	C	het	37.64	15
4	113848517	113848517	C	T	exonic	Skint5	.	nonsynonymous SNV	Skint5:NM_001167876:exon16:c.T1441A:p.L481M,Skint5:NM_001167878:exon16:c.T1441A:p.L481M	.	het	.	4	113848517	113848517	C	T	het	34.64	16
4	113848518	113848518	A	G	exonic	Skint5	.	nonsynonymous SNV	Skint5:NM_001167876:exon16:c.G1440C:p.E480D,Skint5:NM_001167878:exon16:c.G1440C:p.E480D	.	het	.	4	113848518	113848518	A	G	het	37.64	15
4	113850689	113850689	A	T	exonic	Skint5	.	nonsynonymous SNV	Skint5:NM_001167876:exon15:c.C1408A:p.Q470K,Skint5:NM_001167878:exon15:c.C1408A:p.Q470K	.	het	.	4	113850689	113850689	A	T	het	46.64	12
4	113850694	113850694	C	G	exonic	Skint5	.	nonsynonymous SNV	Skint5:NM_001167876:exon15:c.G1403C:p.S468T,Skint5:NM_001167878:exon15:c.G1403C:p.S468T	.	het	.	4	113850694	113850694	C	G	het	46.64	12
4	115023718	115023718	A	G	exonic	Stil	.	nonsynonymous SNV	Stil:NM_001304551:exon11:c.C780G:p.S260R,Stil:NM_001304555:exon12:c.C1458G:p.S486R,Stil:NM_009185:exon12:c.C1458G:p.S486R,Stil:NM_001304553:exon13:c.C147G:p.S49R	.	het	.	4	115023718	115023718	A	G	het	131.64	19
4	115024290	115024290	T	G	exonic	Stil	.	nonsynonymous SNV	Stil:NM_001304551:exon11:c.C1352G:p.P451R,Stil:NM_001304555:exon12:c.C2030G:p.P677R,Stil:NM_009185:exon12:c.C2030G:p.P677R,Stil:NM_001304553:exon13:c.C719G:p.P240R	.	het	.	4	115024290	115024290	T	G	het	158.64	26
4	115024347	115024347	A	G	exonic	Stil	.	nonsynonymous SNV	Stil:NM_001304551:exon11:c.T1409G:p.M470R,Stil:NM_001304555:exon12:c.T2087G:p.M696R,Stil:NM_009185:exon12:c.T2087G:p.M696R,Stil:NM_001304553:exon13:c.T776G:p.M259R	.	het	.	4	115024347	115024347	A	G	het	130.64	29
4	115038343	115038343	A	G	exonic	Stil	.	nonsynonymous SNV	Stil:NM_001304551:exon14:c.C1883G:p.S628C,Stil:NM_001304559:exon14:c.C1625G:p.S542C,Stil:NM_001304555:exon15:c.C2558G:p.S853C,Stil:NM_009185:exon15:c.C2561G:p.S854C,Stil:NM_001304553:exon16:c.C1250G:p.S417C	.	het	.	4	115038343	115038343	A	G	het	52.64	25
4	115039295	115039295	C	G	exonic	Stil	.	nonsynonymous SNV	Stil:NM_001304551:exon15:c.T2298G:p.N766K,Stil:NM_001304559:exon15:c.T2040G:p.N680K,Stil:NM_001304555:exon16:c.T2973G:p.N991K,Stil:NM_009185:exon16:c.T2976G:p.N992K,Stil:NM_001304553:exon17:c.T1665G:p.N555K	.	het	.	4	115039295	115039295	C	G	het	43.64	13
4	115041198	115041198	G	T	exonic	Stil	.	nonsynonymous SNV	Stil:NM_001304551:exon16:c.A2346T:p.E782D,Stil:NM_001304559:exon16:c.A2088T:p.E696D,Stil:NM_001304555:exon17:c.A3021T:p.E1007D,Stil:NM_009185:exon17:c.A3024T:p.E1008D,Stil:NM_001304553:exon18:c.A1713T:p.E571D	.	het	.	4	115041198	115041198	G	T	het	213.64	91
4	115041206	115041206	G	A	exonic	Stil	.	nonsynonymous SNV	Stil:NM_001304551:exon16:c.T2354A:p.I785N,Stil:NM_001304559:exon16:c.T2096A:p.I699N,Stil:NM_001304555:exon17:c.T3029A:p.I1010N,Stil:NM_009185:exon17:c.T3032A:p.I1011N,Stil:NM_001304553:exon18:c.T1721A:p.I574N	.	het	.	4	115041206	115041206	G	A	het	236.64	93
4	115041246	115041246	G	A	exonic	Stil	.	nonsynonymous SNV	Stil:NM_001304551:exon16:c.G2394A:p.M798I,Stil:NM_001304559:exon16:c.G2136A:p.M712I,Stil:NM_001304555:exon17:c.G3069A:p.M1023I,Stil:NM_009185:exon17:c.G3072A:p.M1024I,Stil:NM_001304553:exon18:c.G1761A:p.M587I	.	het	.	4	115041246	115041246	G	A	het	102.64	98
4	115041285	115041285	G	T	exonic	Stil	.	nonsynonymous SNV	Stil:NM_001304551:exon16:c.G2433T:p.E811D,Stil:NM_001304559:exon16:c.G2175T:p.E725D,Stil:NM_001304555:exon17:c.G3108T:p.E1036D,Stil:NM_009185:exon17:c.G3111T:p.E1037D,Stil:NM_001304553:exon18:c.G1800T:p.E600D	.	het	.	4	115041285	115041285	G	T	het	132.64	88
4	115041487	115041487	G	A	exonic	Stil	.	nonsynonymous SNV	Stil:NM_001304551:exon16:c.C2635A:p.Q879K,Stil:NM_001304559:exon16:c.C2377A:p.Q793K,Stil:NM_001304555:exon17:c.C3310A:p.Q1104K,Stil:NM_009185:exon17:c.C3313A:p.Q1105K,Stil:NM_001304553:exon18:c.C2002A:p.Q668K	.	het	.	4	115041487	115041487	G	A	het	118.64	60
4	115041491	115041491	T	A	exonic	Stil	.	nonsynonymous SNV	Stil:NM_001304551:exon16:c.G2639A:p.S880N,Stil:NM_001304559:exon16:c.G2381A:p.S794N,Stil:NM_001304555:exon17:c.G3314A:p.S1105N,Stil:NM_009185:exon17:c.G3317A:p.S1106N,Stil:NM_001304553:exon18:c.G2006A:p.S669N	.	het	.	4	115041491	115041491	T	A	het	118.64	60
4	115041524	115041524	G	T	exonic	Stil	.	nonsynonymous SNV	Stil:NM_001304551:exon16:c.C2672T:p.P891L,Stil:NM_001304559:exon16:c.C2414T:p.P805L,Stil:NM_001304555:exon17:c.C3347T:p.P1116L,Stil:NM_009185:exon17:c.C3350T:p.P1117L,Stil:NM_001304553:exon18:c.C2039T:p.P680L	.	het	.	4	115041524	115041524	G	T	het	139.64	73
4	115041592	115041592	T	C	exonic	Stil	.	nonsynonymous SNV	Stil:NM_001304551:exon16:c.G2740C:p.G914R,Stil:NM_001304559:exon16:c.G2482C:p.G828R,Stil:NM_001304555:exon17:c.G3415C:p.G1139R,Stil:NM_009185:exon17:c.G3418C:p.G1140R,Stil:NM_001304553:exon18:c.G2107C:p.G703R	.	het	.	4	115041592	115041592	T	C	het	169.64	73
4	115041597	115041597	C	A	exonic	Stil	.	nonsynonymous SNV	Stil:NM_001304551:exon16:c.T2745A:p.H915Q,Stil:NM_001304559:exon16:c.T2487A:p.H829Q,Stil:NM_001304555:exon17:c.T3420A:p.H1140Q,Stil:NM_009185:exon17:c.T3423A:p.H1141Q,Stil:NM_001304553:exon18:c.T2112A:p.H704Q	.	het	.	4	115041597	115041597	C	A	het	169.64	73
4	115041645	115041645	T	A	exonic	Stil	.	nonsynonymous SNV	Stil:NM_001304551:exon16:c.C2793A:p.D931E,Stil:NM_001304559:exon16:c.C2535A:p.D845E,Stil:NM_001304555:exon17:c.C3468A:p.D1156E,Stil:NM_009185:exon17:c.C3471A:p.D1157E,Stil:NM_001304553:exon18:c.C2160A:p.D720E	.	het	.	4	115041645	115041645	T	A	het	89.64	79
4	115041783	115041783	C	A	exonic	Stil	.	nonsynonymous SNV	Stil:NM_001304551:exon16:c.G2931A:p.M977I,Stil:NM_001304559:exon16:c.G2673A:p.M891I,Stil:NM_001304555:exon17:c.G3606A:p.M1202I,Stil:NM_009185:exon17:c.G3609A:p.M1203I,Stil:NM_001304553:exon18:c.G2298A:p.M766I	.	het	.	4	115041783	115041783	C	A	het	99.64	69
4	115041784	115041784	C	G	exonic	Stil	.	nonsynonymous SNV	Stil:NM_001304551:exon16:c.A2932G:p.N978D,Stil:NM_001304559:exon16:c.A2674G:p.N892D,Stil:NM_001304555:exon17:c.A3607G:p.N1203D,Stil:NM_009185:exon17:c.A3610G:p.N1204D,Stil:NM_001304553:exon18:c.A2299G:p.N767D	.	het	.	4	115041784	115041784	C	G	het	99.64	69
4	115126572	115126572	G	A	exonic	Cyp4x1	.	nonsynonymous SNV	Cyp4x1:NM_001003947:exon3:c.C353T:p.T118I	.	het	.	4	115126572	115126572	G	A	het	30.64	13
4	115127470	115127470	A	G	exonic	Cyp4x1	.	nonsynonymous SNV	Cyp4x1:NM_001003947:exon2:c.A290C:p.D97A	.	het	.	4	115127470	115127470	A	G	het	150.64	44
4	115127521	115127521	C	T	exonic	Cyp4x1	.	nonsynonymous SNV	Cyp4x1:NM_001003947:exon2:c.T239A:p.F80Y	.	het	.	4	115127521	115127521	C	T	het	260.64	55
4	115127525	115127525	C	T	exonic	Cyp4x1	.	nonsynonymous SNV	Cyp4x1:NM_001003947:exon2:c.G235A:p.A79T	.	het	.	4	115127525	115127525	C	T	het	62.64	58
4	115301951	115301951	T	C	exonic	Cyp4a12a	.	nonsynonymous SNV	Cyp4a12a:NM_177406:exon4:c.G417C:p.Q139H	.	het	.	4	115301951	115301951	T	C	het	61.64	26
4	115487306	115487306	A	T	exonic	Cyp4a14	.	nonsynonymous SNV	Cyp4a14:NM_007822:exon12:c.G1361A:p.C454Y	.	het	.	4	115487306	115487306	A	T	het	477.64	26
4	115521096	115521096	C	T	exonic	Cyp4a10	.	nonsynonymous SNV	Cyp4a10:NM_010011:exon4:c.G408T:p.Q136H	.	het	.	4	115521096	115521096	C	T	het	73.64	18
4	115521097	115521097	G	A	exonic	Cyp4a10	.	nonsynonymous SNV	Cyp4a10:NM_010011:exon4:c.C409A:p.P137T	.	het	.	4	115521097	115521097	G	A	het	73.64	18
4	115885925	115885925	T	A	exonic	Kncn	.	nonsynonymous SNV	Kncn:NM_001039124:exon2:c.C196A:p.L66M,Kncn:NM_001320545:exon2:c.C196A:p.L66M	.	het	.	4	115885925	115885925	T	A	het	33.64	12
4	115885941	115885941	G	A	exonic	Kncn	.	nonsynonymous SNV	Kncn:NM_001039124:exon2:c.C212A:p.P71H,Kncn:NM_001320545:exon2:c.C212A:p.P71H	.	het	.	4	115885941	115885941	G	A	het	84.64	10
4	116048534	116048534	T	A	exonic	Nsun4	.	nonsynonymous SNV	Nsun4:NM_001369076:exon2:c.C77T:p.A26V,Nsun4:NM_028142:exon2:c.C224T:p.A75V,Nsun4:NM_001369075:exon3:c.C77T:p.A26V	.	het	.	4	116048534	116048534	T	A	het	88.64	13
4	116092928	116092928	A	T	exonic	Lrrc41	.	nonsynonymous SNV	Lrrc41:NM_153521:exon5:c.G1537T:p.A513S	.	het	.	4	116092928	116092928	A	T	het	436.64	17
4	116092937	116092937	A	G	exonic	Lrrc41	.	nonsynonymous SNV	Lrrc41:NM_153521:exon5:c.C1546G:p.R516G	.	het	.	4	116092937	116092937	A	G	het	439.64	16
4	116574388	116574388	A	G	exonic	Gpbp1l1	.	nonsynonymous SNV	Gpbp1l1:NM_001368177:exon5:c.T242G:p.V81G,Gpbp1l1:NM_029868:exon5:c.T242G:p.V81G	.	het	.	4	116574388	116574388	A	G	het	61.64	13
4	116574390	116574390	0	G	exonic	Gpbp1l1	.	nonsynonymous SNV	Gpbp1l1:NM_001368177:exon5:c.T244G:p.S82A,Gpbp1l1:NM_029868:exon5:c.T244G:p.S82A	.	het	.	4	116574390	116574390	-	G	het	61.60	13
4	116574424	116574424	A	T	exonic	Gpbp1l1	.	nonsynonymous SNV	Gpbp1l1:NM_001368177:exon5:c.A278T:p.H93L,Gpbp1l1:NM_029868:exon5:c.A278T:p.H93L	.	het	.	4	116574424	116574424	A	T	het	139.64	11
4	116574425	116574425	G	A	exonic	Gpbp1l1	.	nonsynonymous SNV	Gpbp1l1:NM_001368177:exon5:c.T279A:p.H93Q,Gpbp1l1:NM_029868:exon5:c.T279A:p.H93Q	.	het	.	4	116574425	116574425	G	A	het	139.64	11
4	116574430	116574430	C	T	exonic	Gpbp1l1	.	nonsynonymous SNV	Gpbp1l1:NM_001368177:exon5:c.C284T:p.S95F,Gpbp1l1:NM_029868:exon5:c.C284T:p.S95F	.	het	.	4	116574430	116574430	C	T	het	139.64	11
4	116599939	116599939	C	T	exonic	Ccdc17	.	nonsynonymous SNV	Ccdc17:NM_001037916:exon13:c.C1619T:p.A540V	.	het	.	4	116599939	116599939	C	T	het	29.64	18
4	116703468	116703468	T	C	exonic	Mmachc	.	nonsynonymous SNV	Mmachc:NM_025962:exon4:c.C829G:p.P277A	.	het	.	4	116703468	116703468	T	C	het	603.64	28
4	116805219	116805219	C	T	exonic	Toe1	.	nonsynonymous SNV	Toe1:NM_026654:exon7:c.C828A:p.S276R	.	het	.	4	116805219	116805219	C	T	het	142.64	10
4	116805223	116805223	G	A	exonic	Toe1	.	nonsynonymous SNV	Toe1:NM_026654:exon7:c.C824T:p.S275F	.	het	.	4	116805223	116805223	G	A	het	142.64	10
4	116805262	116805262	A	G	exonic	Toe1	.	nonsynonymous SNV	Toe1:NM_026654:exon7:c.G785C:p.G262A	.	het	.	4	116805262	116805262	A	G	het	41.64	11
4	116815646	116815646	C	T	exonic	Mutyh	.	nonsynonymous SNV	Mutyh:NM_001316747:exon2:c.A86T:p.Q29L	.	het	.	4	116815646	116815646	C	T	het	202.64	20
4	116815648	116815648	A	T	exonic	Mutyh	.	nonsynonymous SNV	Mutyh:NM_001316747:exon2:c.C88T:p.L30F,Mutyh:NM_133250:exon3:c.C197T:p.A66V,Mutyh:NM_001159581:exon4:c.C197T:p.A66V	.	het	.	4	116815648	116815648	A	T	het	202.64	20
4	116815649	116815649	C	A	exonic	Mutyh	.	nonsynonymous SNV	Mutyh:NM_001316747:exon2:c.T89A:p.L30H	.	het	.	4	116815649	116815649	C	A	het	202.64	20
4	116815664	116815664	C	T	exonic	Mutyh	.	nonsynonymous SNV	Mutyh:NM_001316747:exon2:c.G104T:p.C35F,Mutyh:NM_133250:exon3:c.G213T:p.L71F,Mutyh:NM_001159581:exon4:c.G213T:p.L71F	.	het	.	4	116815664	116815664	C	T	het	37.64	15
4	117121311	117121311	0	G	exonic	Btbd19	.	nonsynonymous SNV	Btbd19:NM_001384196:exon6:c.G490C:p.G164R	.	het	.	4	117121311	117121311	-	G	het	52.60	10
4	117121314	117121314	A	T	exonic	Btbd19	.	nonsynonymous SNV	Btbd19:NM_001384196:exon6:c.C487A:p.R163S	.	het	.	4	117121314	117121314	A	T	het	52.64	10
4	117676027	117676027	T	C	exonic	Dmap1	.	nonsynonymous SNV	Dmap1:NM_023178:exon7:c.A829G:p.T277A	.	het	.	4	117676027	117676027	T	C	het	178.64	13
4	117863926	117863926	A	G	exonic	Slc6a9	.	nonsynonymous SNV	Slc6a9:NM_001355175:exon7:c.C929G:p.A310G,Slc6a9:NM_001369017:exon7:c.C677G:p.A226G,Slc6a9:NM_001369016:exon8:c.C872G:p.A291G,Slc6a9:NM_008135:exon8:c.C872G:p.A291G	.	het	.	4	117863926	117863926	A	G	het	78.64	12
4	118168520	118168520	G	A	exonic	Kdm4a	.	nonsynonymous SNV	Kdm4a:NM_001161823:exon5:c.A488T:p.E163V,Kdm4a:NM_172382:exon5:c.A488T:p.E163V	.	het	.	4	118168520	118168520	G	A	het	37.64	12
4	118390826	118390826	A	G	exonic	Szt2	.	nonsynonymous SNV	Szt2:NM_198170:exon15:c.G2200C:p.D734H	.	het	.	4	118390826	118390826	A	G	het	167.64	13
4	118476206	118476206	A	C	exonic	Tie1	.	nonsynonymous SNV	Tie1:NM_011587:exon15:c.A2462G:p.Q821R	.	het	.	4	118476206	118476206	A	C	het	59.64	18
4	118621461	118621461	T	C	exonic	Ebna1bp2	.	nonsynonymous SNV	Ebna1bp2:NM_026932:exon3:c.A251C:p.Q84P	.	het	.	4	118621461	118621461	T	C	het	28.64	18
4	118622095	118622095	A	G	exonic	Ebna1bp2	.	nonsynonymous SNV	Ebna1bp2:NM_026932:exon4:c.C349G:p.L117V	.	het	.	4	118622095	118622095	A	G	het	88.64	28
4	118665588	118665588	T	C	exonic	Olfr62	.	nonsynonymous SNV	Olfr62:NM_146315:exon1:c.A70C:p.T24P	.	het	.	4	118665588	118665588	T	C	het	165.64	13
4	119185636	119185636	G	A	exonic	Ermap	.	nonsynonymous SNV	Ermap:NM_001369066:exon5:c.C605T:p.S202F,Ermap:NM_013848:exon5:c.C611T:p.S204F	.	het	.	4	119185636	119185636	G	A	het	73.64	18
4	119247201	119247201	G	T	exonic	P3h1	.	nonsynonymous SNV	P3h1:NM_001042411:exon13:c.G1381T:p.V461L,P3h1:NM_001286148:exon13:c.G1939T:p.V647L,P3h1:NM_019782:exon13:c.G1918T:p.V640L,P3h1:NM_019783:exon13:c.G1918T:p.V640L	.	het	.	4	119247201	119247201	G	T	het	31.64	14
4	119437137	119437137	C	A	exonic	Zmynd12	.	nonsynonymous SNV	Zmynd12:NM_001014900:exon3:c.C310A:p.H104N	.	het	.	4	119437137	119437137	C	A	het	103.64	24
4	119437142	119437142	T	C	exonic	Zmynd12	.	nonsynonymous SNV	Zmynd12:NM_001014900:exon3:c.A315C:p.E105D	.	het	.	4	119437142	119437142	T	C	het	352.64	24
4	119437155	119437155	T	C	exonic	Zmynd12	.	nonsynonymous SNV	Zmynd12:NM_001014900:exon3:c.G328C:p.A110P	.	het	.	4	119437155	119437155	T	C	het	292.64	20
4	119437156	119437156	G	A	exonic	Zmynd12	.	nonsynonymous SNV	Zmynd12:NM_001014900:exon3:c.C329A:p.A110E	.	het	.	4	119437156	119437156	G	A	het	292.64	20
4	119437187	119437187	A	G	exonic	Zmynd12	.	nonsynonymous SNV	Zmynd12:NM_001014900:exon3:c.C360G:p.N120K	.	het	.	4	119437187	119437187	A	G	het	266.64	23
4	119437206	119437206	G	A	exonic	Zmynd12	.	nonsynonymous SNV	Zmynd12:NM_001014900:exon3:c.G379A:p.V127I	.	het	.	4	119437206	119437206	G	A	het	70.64	19
4	119437213	119437213	T	A	exonic	Zmynd12	.	nonsynonymous SNV	Zmynd12:NM_001014900:exon3:c.T386A:p.L129H	.	het	.	4	119437213	119437213	T	A	het	160.64	19
4	119437216	119437216	T	C	exonic	Zmynd12	.	nonsynonymous SNV	Zmynd12:NM_001014900:exon3:c.T389C:p.V130A	.	het	.	4	119437216	119437216	T	C	het	160.64	19
4	119437224	119437224	C	A	exonic	Zmynd12	.	nonsynonymous SNV	Zmynd12:NM_001014900:exon3:c.T397A:p.Y133N	.	het	.	4	119437224	119437224	C	A	het	37.64	15
4	119437228	119437228	A	G	exonic	Zmynd12	.	nonsynonymous SNV	Zmynd12:NM_001014900:exon3:c.T401G:p.L134R	.	het	.	4	119437228	119437228	A	G	het	115.64	16
4	120886937	120886937	T	G	exonic	Rims3	.	nonsynonymous SNV	Rims3:NM_182929:exon5:c.T363G:p.F121L	.	het	.	4	120886937	120886937	T	G	het	34.64	11
4	121146464	121146464	T	C	exonic	Rlf	.	nonsynonymous SNV	Rlf:NM_001346660:exon8:c.T5648G:p.L1883R	.	het	.	4	121146464	121146464	T	C	het	80.64	16
4	121146485	121146485	A	G	exonic	Rlf	.	nonsynonymous SNV	Rlf:NM_001346660:exon8:c.G5627C:p.G1876A	.	het	.	4	121146485	121146485	A	G	het	28.64	20
4	121146690	121146690	C	T	exonic	Rlf	.	nonsynonymous SNV	Rlf:NM_001346660:exon8:c.C5422A:p.P1808T	.	het	.	4	121146690	121146690	C	T	het	55.64	14
4	121146792	121146792	T	G	exonic	Rlf	.	nonsynonymous SNV	Rlf:NM_001346660:exon8:c.G5320C:p.E1774Q	.	het	.	4	121146792	121146792	T	G	het	22.64	11
4	121148593	121148593	G	A	exonic	Rlf	.	nonsynonymous SNV	Rlf:NM_001346660:exon8:c.A3519T:p.Q1173H	.	het	.	4	121148593	121148593	G	A	het	49.64	11
4	121148733	121148733	A	C	exonic	Rlf	.	nonsynonymous SNV	Rlf:NM_001346660:exon8:c.C3379G:p.Q1127E	.	het	.	4	121148733	121148733	A	C	het	70.64	19
4	121148737	121148737	T	G	exonic	Rlf	.	nonsynonymous SNV	Rlf:NM_001346660:exon8:c.G3375C:p.E1125D	.	het	.	4	121148737	121148737	T	G	het	70.64	19
4	121150294	121150294	G	T	exonic	Rlf	.	nonsynonymous SNV	Rlf:NM_001346660:exon8:c.G1818A:p.M606I	.	het	.	4	121150294	121150294	G	T	het	23.64	12
4	121150330	121150330	G	A	exonic	Rlf	.	nonsynonymous SNV	Rlf:NM_001346660:exon8:c.G1782T:p.E594D	.	het	.	4	121150330	121150330	G	A	het	28.64	15
4	121150365	121150365	G	T	exonic	Rlf	.	nonsynonymous SNV	Rlf:NM_001346660:exon8:c.T1747A:p.C583S	.	het	.	4	121150365	121150365	G	T	het	23.64	17
4	121150519	121150519	T	C	exonic	Rlf	.	nonsynonymous SNV	Rlf:NM_001346660:exon8:c.T1593G:p.N531K	.	het	.	4	121150519	121150519	T	C	het	70.64	19
4	121150521	121150521	A	G	exonic	Rlf	.	nonsynonymous SNV	Rlf:NM_001346660:exon8:c.A1591C:p.N531H	.	het	.	4	121150521	121150521	A	G	het	70.64	19
4	121150769	121150769	G	A	exonic	Rlf	.	nonsynonymous SNV	Rlf:NM_001346660:exon8:c.C1343T:p.P448L	.	het	.	4	121150769	121150769	G	A	het	52.64	10
4	121150775	121150775	A	T	exonic	Rlf	.	nonsynonymous SNV	Rlf:NM_001346660:exon8:c.C1337A:p.P446Q	.	het	.	4	121150775	121150775	A	T	het	49.64	11
4	121150920	121150920	T	G	exonic	Rlf	.	nonsynonymous SNV	Rlf:NM_001346660:exon8:c.A1192C:p.I398L	.	het	.	4	121150920	121150920	T	G	het	50.64	17
4	121159312	121159312	C	G	exonic	Rlf	.	nonsynonymous SNV	Rlf:NM_001346660:exon6:c.G827C:p.C276S	.	het	.	4	121159312	121159312	C	G	het	108.64	35
4	121318255	121318255	A	C	exonic	Gm12888	.	nonsynonymous SNV	Gm12888:NM_001033791:exon3:c.T329G:p.F110C	.	het	.	4	121318255	121318255	A	C	het	338.64	103
4	121318312	121318312	C	G	exonic	Gm12888	.	nonsynonymous SNV	Gm12888:NM_001033791:exon3:c.G272C:p.C91S	.	het	.	4	121318312	121318312	C	G	het	237.64	113
4	121318315	121318315	C	T	exonic	Gm12888	.	nonsynonymous SNV	Gm12888:NM_001033791:exon3:c.T269A:p.V90E	.	het	.	4	121318315	121318315	C	T	het	225.64	117
4	121416671	121416671	C	T	exonic	Gm12886	.	nonsynonymous SNV	Gm12886:NM_001144948:exon3:c.T347A:p.L116Q	.	het	.	4	121416671	121416671	C	T	het	154.64	46
4	121416677	121416677	T	A	exonic	Gm12886	.	nonsynonymous SNV	Gm12886:NM_001144948:exon3:c.A341T:p.Q114L	.	het	.	4	121416677	121416677	T	A	het	154.64	46
4	121416786	121416786	T	A	exonic	Gm12886	.	nonsynonymous SNV	Gm12886:NM_001144948:exon3:c.G232T:p.D78Y	.	het	.	4	121416786	121416786	T	A	het	58.64	60
4	122701239	122701239	T	C	exonic	9530002B09Rik	.	nonsynonymous SNV	9530002B09Rik:NM_023865:exon3:c.A287C:p.K96T	.	het	.	4	122701239	122701239	T	C	het	52.64	10
4	122701240	122701240	C	T	exonic	9530002B09Rik	.	nonsynonymous SNV	9530002B09Rik:NM_023865:exon3:c.G288T:p.K96N	.	het	.	4	122701240	122701240	C	T	het	52.64	10
4	122701242	122701242	T	C	exonic	9530002B09Rik	.	nonsynonymous SNV	9530002B09Rik:NM_023865:exon3:c.A290C:p.Q97P	.	het	.	4	122701242	122701242	T	C	het	52.64	10
4	122862638	122862638	T	C	exonic	Cap1	.	nonsynonymous SNV	Cap1:NM_001301067:exon10:c.A1099G:p.N367D,Cap1:NM_001358035:exon10:c.A1099G:p.N367D,Cap1:NM_001358036:exon10:c.A1099G:p.N367D,Cap1:NM_007598:exon10:c.A1099G:p.N367D	.	het	.	4	122862638	122862638	T	C	het	274.64	26
4	122862649	122862649	G	A	exonic	Cap1	.	nonsynonymous SNV	Cap1:NM_001301067:exon10:c.A1088T:p.K363M,Cap1:NM_001358035:exon10:c.A1088T:p.K363M,Cap1:NM_001358036:exon10:c.A1088T:p.K363M,Cap1:NM_007598:exon10:c.A1088T:p.K363M	.	het	.	4	122862649	122862649	G	A	het	55.64	24
4	122862655	122862655	G	A	exonic	Cap1	.	nonsynonymous SNV	Cap1:NM_001301067:exon10:c.A1082T:p.Q361L,Cap1:NM_001358035:exon10:c.A1082T:p.Q361L,Cap1:NM_001358036:exon10:c.A1082T:p.Q361L,Cap1:NM_007598:exon10:c.A1082T:p.Q361L	.	het	.	4	122862655	122862655	G	A	het	55.64	24
4	122862703	122862703	T	C	exonic	Cap1	.	nonsynonymous SNV	Cap1:NM_001301067:exon10:c.A1034G:p.E345G,Cap1:NM_001358035:exon10:c.A1034G:p.E345G,Cap1:NM_001358036:exon10:c.A1034G:p.E345G,Cap1:NM_007598:exon10:c.A1034G:p.E345G	.	het	.	4	122862703	122862703	T	C	het	127.64	30
4	122862994	122862994	C	T	exonic	Cap1	.	nonsynonymous SNV	Cap1:NM_001301067:exon9:c.C897A:p.F299L,Cap1:NM_001358035:exon9:c.C897A:p.F299L,Cap1:NM_001358036:exon9:c.C897A:p.F299L,Cap1:NM_007598:exon9:c.C897A:p.F299L	.	het	.	4	122862994	122862994	C	T	het	76.64	17
4	122863028	122863028	G	C	exonic	Cap1	.	nonsynonymous SNV	Cap1:NM_001301067:exon9:c.A863G:p.Q288R,Cap1:NM_001358035:exon9:c.A863G:p.Q288R,Cap1:NM_001358036:exon9:c.A863G:p.Q288R,Cap1:NM_007598:exon9:c.A863G:p.Q288R	.	het	.	4	122863028	122863028	G	C	het	133.64	13
4	122863052	122863052	A	G	exonic	Cap1	.	nonsynonymous SNV	Cap1:NM_001301067:exon9:c.A839C:p.H280P,Cap1:NM_001358035:exon9:c.A839C:p.H280P,Cap1:NM_001358036:exon9:c.A839C:p.H280P,Cap1:NM_007598:exon9:c.A839C:p.H280P	.	het	.	4	122863052	122863052	A	G	het	140.64	12
4	123116358	123116358	T	G	exonic	Oxct2b	.	nonsynonymous SNV	Oxct2b:NM_181859:exon1:c.C70G:p.L24V	.	het	.	4	123116358	123116358	T	G	het	49.64	11
4	123116734	123116734	C	T	exonic	Oxct2b	.	nonsynonymous SNV	Oxct2b:NM_181859:exon1:c.G446T:p.G149V	.	het	.	4	123116734	123116734	C	T	het	336.64	27
4	123212226	123212226	G	A	exonic	Nt5c1a	.	nonsynonymous SNV	Nt5c1a:NM_001085502:exon4:c.T472A:p.C158S	.	het	.	4	123212226	123212226	G	A	het	28.64	26
4	123473012	123473012	T	A	exonic	Macf1	.	nonsynonymous SNV	Macf1:NM_001199136:exon36:c.A7955T:p.N2652I	.	het	.	4	123473012	123473012	T	A	het	379.64	21
4	123473034	123473034	T	C	exonic	Macf1	.	nonsynonymous SNV	Macf1:NM_001199136:exon36:c.A7933G:p.I2645V	.	het	.	4	123473034	123473034	T	C	het	34.64	16
4	123473114	123473114	C	T	exonic	Macf1	.	nonsynonymous SNV	Macf1:NM_001199136:exon36:c.C7853A:p.P2618H	.	het	.	4	123473114	123473114	C	T	het	201.64	16
4	123475031	123475031	C	G	exonic	Macf1	.	nonsynonymous SNV	Macf1:NM_001199136:exon36:c.A5936C:p.H1979P	.	het	.	4	123475031	123475031	C	G	het	131.68	33
4	123475080	123475080	G	A	exonic	Macf1	.	nonsynonymous SNV	Macf1:NM_001199136:exon36:c.A5887T:p.S1963C	.	het	.	4	123475080	123475080	G	A	het	35.64	23
4	123475100	123475100	T	G	exonic	Macf1	.	nonsynonymous SNV	Macf1:NM_001199136:exon36:c.G5867C:p.G1956A	.	het	.	4	123475100	123475100	T	G	het	316.64	27
4	123489250	123489250	T	C	exonic	Macf1	.	nonsynonymous SNV	Macf1:NM_001199136:exon29:c.A3920G:p.E1307G,Macf1:NM_001199137:exon29:c.A3920G:p.E1307G	.	het	.	4	123489250	123489250	T	C	het	141.64	17
4	123489254	123489254	T	G	exonic	Macf1	.	nonsynonymous SNV	Macf1:NM_001199136:exon29:c.G3916C:p.A1306P,Macf1:NM_001199137:exon29:c.G3916C:p.A1306P	.	het	.	4	123489254	123489254	T	G	het	141.64	17
4	124804742	124804742	G	A	exonic	Mtf1	.	nonsynonymous SNV	Mtf1:NM_008636:exon2:c.T32A:p.I11N	.	het	.	4	124804742	124804742	G	A	het	121.64	17
4	124804744	124804744	A	G	exonic	Mtf1	.	nonsynonymous SNV	Mtf1:NM_008636:exon2:c.T34G:p.F12V	.	het	.	4	124804744	124804744	A	G	het	121.64	17
4	124885965	124885965	T	C	exonic	Epha10	.	nonsynonymous SNV	Epha10:NM_001256432:exon3:c.G603C:p.L201F,Epha10:NM_177671:exon3:c.G603C:p.L201F	.	het	.	4	124885965	124885965	T	C	het	142.64	10
4	124885966	124885966	G	A	exonic	Epha10	.	nonsynonymous SNV	Epha10:NM_001256432:exon3:c.G604A:p.V202I,Epha10:NM_177671:exon3:c.G604A:p.V202I	.	het	.	4	124885966	124885966	G	A	het	142.64	10
4	126512054	126512054	T	C	exonic	Ago4	.	nonsynonymous SNV	Ago4:NM_153177:exon9:c.T1061G:p.M354R	.	het	.	4	126512054	126512054	T	C	het	224.64	20
4	126512073	126512073	A	G	exonic	Ago4	.	nonsynonymous SNV	Ago4:NM_153177:exon9:c.G1042C:p.D348H	.	het	.	4	126512073	126512073	A	G	het	103.64	19
4	126560054	126560054	C	G	exonic	Clspn	.	nonsynonymous SNV	Clspn:NM_175554:exon3:c.A269G:p.E90G	.	het	.	4	126560054	126560054	C	G	het	123.64	11
4	126560057	126560057	T	C	exonic	Clspn	.	nonsynonymous SNV	Clspn:NM_175554:exon3:c.A272C:p.N91T	.	het	.	4	126560057	126560057	T	C	het	123.64	11
4	126746548	126746548	G	T	exonic	Ncdn	.	nonsynonymous SNV	Ncdn:NM_001355412:exon6:c.C1700A:p.P567Q,Ncdn:NM_001355413:exon6:c.C1700A:p.P567Q,Ncdn:NM_011986:exon6:c.C1751A:p.P584Q	.	het	.	4	126746548	126746548	G	T	het	40.64	14
4	126746552	126746552	C	G	exonic	Ncdn	.	nonsynonymous SNV	Ncdn:NM_001355412:exon6:c.T1696C:p.S566P,Ncdn:NM_001355413:exon6:c.T1696C:p.S566P,Ncdn:NM_011986:exon6:c.T1747C:p.S583P	.	het	.	4	126746552	126746552	C	G	het	40.64	14
4	126746588	126746588	A	C	exonic	Ncdn	.	nonsynonymous SNV	Ncdn:NM_001355412:exon6:c.A1660G:p.T554A,Ncdn:NM_001355413:exon6:c.A1660G:p.T554A,Ncdn:NM_011986:exon6:c.A1711G:p.T571A	.	het	.	4	126746588	126746588	A	C	het	40.64	14
4	126836687	126836687	C	T	exonic	AU040320	.	nonsynonymous SNV	AU040320:NM_001035525:exon11:c.C1706T:p.T569I,AU040320:NM_001035526:exon11:c.C1706T:p.T569I,AU040320:NM_133886:exon11:c.C1706T:p.T569I,AU040320:NM_001355196:exon13:c.C1643T:p.T548I	.	het	.	4	126836687	126836687	C	T	het	130.64	14
4	126865506	126865506	C	T	exonic	Zmym4	.	nonsynonymous SNV	Zmym4:NM_001357201:exon27:c.T4163A:p.L1388Q,Zmym4:NM_001114399:exon29:c.T4433A:p.L1478Q,Zmym4:NM_001379530:exon29:c.T4430A:p.L1477Q	.	het	.	4	126865506	126865506	C	T	het	212.64	14
4	126882217	126882217	T	A	exonic	Zmym4	.	nonsynonymous SNV	Zmym4:NM_001357201:exon23:c.A3527T:p.K1176I,Zmym4:NM_001114399:exon25:c.A3797T:p.K1266I,Zmym4:NM_001379530:exon25:c.A3794T:p.K1265I	.	het	.	4	126882217	126882217	T	A	het	301.64	17
4	126882219	126882219	T	C	exonic	Zmym4	.	nonsynonymous SNV	Zmym4:NM_001357201:exon23:c.T3525G:p.C1175W,Zmym4:NM_001114399:exon25:c.T3795G:p.C1265W,Zmym4:NM_001379530:exon25:c.T3792G:p.C1264W	.	het	.	4	126882219	126882219	T	C	het	301.64	17
4	126890160	126890160	T	C	exonic	Zmym4	.	nonsynonymous SNV	Zmym4:NM_001357201:exon20:c.A3002G:p.Y1001C,Zmym4:NM_001114399:exon22:c.A3272G:p.Y1091C,Zmym4:NM_001379530:exon22:c.A3269G:p.Y1090C	.	het	.	4	126890160	126890160	T	C	het	97.64	10
4	127195241	127195241	A	G	exonic	Dlgap3	.	nonsynonymous SNV	Dlgap3:NM_001302081:exon3:c.A629G:p.Y210C,Dlgap3:NM_198618:exon3:c.A629G:p.Y210C	.	het	.	4	127195241	127195241	A	G	het	40.64	11
4	129178292	129178292	A	G	exonic	S100pbp	.	nonsynonymous SNV	S100pbp:NM_001379589:exon4:c.T913C:p.Y305H,S100pbp:NM_001379591:exon4:c.T913C:p.Y305H,S100pbp:NM_001379588:exon5:c.T913C:p.Y305H,S100pbp:NM_001379590:exon5:c.T913C:p.Y305H,S100pbp:NM_001379592:exon5:c.T913C:p.Y305H,S100pbp:NM_001379597:exon5:c.T787C:p.Y263H,S100pbp:NM_029036:exon5:c.T913C:p.Y305H,S100pbp:NM_001379593:exon6:c.T556C:p.Y186H,S100pbp:NM_001379596:exon6:c.T787C:p.Y263H,S100pbp:NM_0013…	.	het	.	4	129178292	129178292	A	G	het	74.64	12
4	129293401	129293401	T	C	exonic	Sync	.	nonsynonymous SNV	Sync:NM_023485:exon2:c.G225C:p.E75D	.	het	.	4	129293401	129293401	T	C	het	94.64	11
4	129293404	129293404	C	T	exonic	Sync	.	nonsynonymous SNV	Sync:NM_023485:exon2:c.G228T:p.K76N	.	het	.	4	129293404	129293404	C	T	het	94.64	11
4	129293682	129293682	A	G	exonic	Sync	.	nonsynonymous SNV	Sync:NM_023485:exon2:c.A506G:p.Q169R	.	het	.	4	129293682	129293682	A	G	het	88.64	13
4	129293687	129293687	A	G	exonic	Sync	.	nonsynonymous SNV	Sync:NM_023485:exon2:c.T511G:p.C171G	.	het	.	4	129293687	129293687	A	G	het	186.64	16
4	129433078	129433078	0	A	exonic	Zbtb8b	.	nonsynonymous SNV	Zbtb8b:NM_153541:exon2:c.C194T:p.T65I	.	het	.	4	129433078	129433078	-	A	het	79.60	16
4	129489358	129489358	A	G	exonic	Tssk3	.	nonsynonymous SNV	Tssk3:NM_080442:exon2:c.G520C:p.A174P	.	het	.	4	129489358	129489358	A	G	het	40.64	11
4	129491523	129491523	G	A	exonic	Fam229a	.	nonsynonymous SNV	Fam229a:NM_001085491:exon2:c.T246A:p.D82E	.	het	.	4	129491523	129491523	G	A	het	187.64	15
4	129611039	129611039	G	T	exonic	Dcdc2b	.	nonsynonymous SNV	Dcdc2b:NM_001195730:exon2:c.G298A:p.V100M	.	het	.	4	129611039	129611039	G	T	het	136.64	12
4	129611075	129611075	A	G	exonic	Dcdc2b	.	nonsynonymous SNV	Dcdc2b:NM_001195730:exon2:c.G262C:p.D88H	.	het	.	4	129611075	129611075	A	G	het	206.64	13
4	129614201	129614201	T	C	exonic	Dcdc2b	.	nonsynonymous SNV	Dcdc2b:NM_001195730:exon1:c.C57G:p.H19Q	.	het	.	4	129614201	129614201	T	C	het	52.64	10
4	129614203	129614203	G	A	exonic	Dcdc2b	.	nonsynonymous SNV	Dcdc2b:NM_001195730:exon1:c.C55T:p.H19Y	.	het	.	4	129614203	129614203	G	A	het	52.64	10
4	129622715	129622715	G	C	exonic	Ccdc28b	.	nonsynonymous SNV	Ccdc28b:NM_025455:exon2:c.C49G:p.P17A	.	het	.	4	129622715	129622715	G	C	het	102.64	13
4	129722730	129722730	C	T	exonic	Khdrbs1	.	nonsynonymous SNV	Khdrbs1:NM_011317:exon5:c.T820A:p.L274M	.	het	.	4	129722730	129722730	C	T	het	316.64	21
4	129722741	129722741	G	A	exonic	Khdrbs1	.	nonsynonymous SNV	Khdrbs1:NM_011317:exon5:c.A809T:p.E270V	.	het	.	4	129722741	129722741	G	A	het	298.64	18
4	129722751	129722751	C	T	exonic	Khdrbs1	.	nonsynonymous SNV	Khdrbs1:NM_011317:exon5:c.C799A:p.Q267K	.	het	.	4	129722751	129722751	C	T	het	298.64	18
4	130007960	130007960	T	C	exonic	Adgrb2	.	nonsynonymous SNV	Adgrb2:NM_001199696:exon6:c.G1376C:p.S459T,Adgrb2:NM_001290714:exon6:c.G1376C:p.S459T,Adgrb2:NM_001377057:exon6:c.G1376C:p.S459T,Adgrb2:NM_001377058:exon6:c.G1376C:p.S459T,Adgrb2:NM_001290715:exon7:c.G1541C:p.S514T,Adgrb2:NM_001377056:exon7:c.G1541C:p.S514T,Adgrb2:NM_173071:exon7:c.G1541C:p.S514T	.	het	.	4	130007960	130007960	T	C	het	23.64	14
4	130013891	130013891	C	T	exonic	Adgrb2	.	nonsynonymous SNV	Adgrb2:NM_001199696:exon19:c.A3017T:p.Y1006F,Adgrb2:NM_001290714:exon19:c.A3017T:p.Y1006F,Adgrb2:NM_001377057:exon19:c.A3017T:p.Y1006F,Adgrb2:NM_001377058:exon19:c.A3017T:p.Y1006F,Adgrb2:NM_001290715:exon20:c.A3182T:p.Y1061F,Adgrb2:NM_001377056:exon20:c.A3182T:p.Y1061F,Adgrb2:NM_173071:exon20:c.A3182T:p.Y1061F	.	het	.	4	130013891	130013891	C	T	het	80.64	10
4	130130860	130130860	C	T	exonic	Hcrtr1	.	nonsynonymous SNV	Hcrtr1:NM_001357258:exon7:c.T707A:p.V236D,Hcrtr1:NM_001163027:exon9:c.T1232A:p.V411D,Hcrtr1:NM_198959:exon9:c.T1232A:p.V411D,Hcrtr1:NM_001305392:exon10:c.T707A:p.V236D	.	het	.	4	130130860	130130860	C	T	het	35.64	10
4	130354171	130354171	G	A	exonic	Zcchc17	.	nonsynonymous SNV	Zcchc17:NM_153160:exon2:c.A31T:p.N11Y	.	het	.	4	130354171	130354171	G	A	het	24.64	15
4	130354176	130354176	A	C	exonic	Zcchc17	.	nonsynonymous SNV	Zcchc17:NM_153160:exon2:c.T26G:p.M9R	.	het	.	4	130354176	130354176	A	C	het	136.64	16
4	130360245	130360245	G	A	exonic	Snrnp40	.	nonsynonymous SNV	Snrnp40:NM_025645:exon1:c.C40A:p.L14M	.	het	.	4	130360245	130360245	G	A	het	82.64	15
4	131891230	131891230	C	T	exonic	Srsf4	.	nonsynonymous SNV	Srsf4:NM_020587:exon2:c.A131T:p.D44V,Srsf4:NM_001369308:exon5:c.A146T:p.D49V,Srsf4:NM_001369309:exon5:c.A146T:p.D49V,Srsf4:NM_001369310:exon5:c.A146T:p.D49V,Srsf4:NM_001369311:exon5:c.A146T:p.D49V	.	het	.	4	131891230	131891230	C	T	het	40.64	14
4	131891238	131891238	G	A	exonic	Srsf4	.	nonsynonymous SNV	Srsf4:NM_020587:exon2:c.G139A:p.D47N,Srsf4:NM_001369308:exon5:c.G154A:p.D52N,Srsf4:NM_001369309:exon5:c.G154A:p.D52N,Srsf4:NM_001369310:exon5:c.G154A:p.D52N,Srsf4:NM_001369311:exon5:c.G154A:p.D52N	.	het	.	4	131891238	131891238	G	A	het	31.64	17
4	131975563	131975563	A	G	exonic	Epb41	.	nonsynonymous SNV	Epb41:NM_001128606:exon10:c.T1441C:p.C481R,Epb41:NM_001128607:exon10:c.T811C:p.C271R,Epb41:NM_183428:exon10:c.T1441C:p.C481R	.	het	.	4	131975563	131975563	A	G	het	250.64	19
4	132204673	132204673	T	C	exonic	Ythdf2	.	nonsynonymous SNV	Ythdf2:NM_145393:exon4:c.T1175G:p.L392R	.	het	.	4	132204673	132204673	T	C	het	149.64	13
4	132204707	132204707	T	A	exonic	Ythdf2	.	nonsynonymous SNV	Ythdf2:NM_145393:exon4:c.A1141T:p.T381S	.	het	.	4	132204707	132204707	T	A	het	88.64	13
4	132204710	132204710	T	C	exonic	Ythdf2	.	nonsynonymous SNV	Ythdf2:NM_145393:exon4:c.T1138G:p.S380A	.	het	.	4	132204710	132204710	T	C	het	88.64	13
4	132204746	132204746	A	G	exonic	Ythdf2	.	nonsynonymous SNV	Ythdf2:NM_145393:exon4:c.G1102C:p.G368R	.	het	.	4	132204746	132204746	A	G	het	91.64	12
4	132204749	132204749	C	T	exonic	Ythdf2	.	nonsynonymous SNV	Ythdf2:NM_145393:exon4:c.G1099A:p.D367N	.	het	.	4	132204749	132204749	C	T	het	91.64	12
4	132232062	132232062	C	T	exonic	Gmeb1	.	nonsynonymous SNV	Gmeb1:NM_020273:exon7:c.T680A:p.V227D,Gmeb1:NM_001122992:exon8:c.T680A:p.V227D	.	het	.	4	132232062	132232062	C	T	het	275.64	14
4	132232065	132232065	C	T	exonic	Gmeb1	.	nonsynonymous SNV	Gmeb1:NM_020273:exon7:c.C677A:p.A226D,Gmeb1:NM_001122992:exon8:c.C677A:p.A226D	.	het	.	4	132232065	132232065	C	T	het	275.64	14
4	132360508	132360508	A	G	exonic	Phactr4	.	nonsynonymous SNV	Phactr4:NM_001161797:exon12:c.T1955C:p.M652T,Phactr4:NM_175306:exon13:c.T2036C:p.M679T	.	het	.	4	132360508	132360508	A	G	het	79.64	16
4	132360511	132360511	G	A	exonic	Phactr4	.	nonsynonymous SNV	Phactr4:NM_001161797:exon12:c.A1952T:p.E651V,Phactr4:NM_175306:exon13:c.A2033T:p.E678V	.	het	.	4	132360511	132360511	G	A	het	79.64	16
4	132550378	132550378	G	A	exonic	Dnajc8	.	nonsynonymous SNV	Dnajc8:NM_172400:exon7:c.T473A:p.F158Y	.	het	.	4	132550378	132550378	G	A	het	118.64	18
4	132550379	132550379	G	A	exonic	Dnajc8	.	nonsynonymous SNV	Dnajc8:NM_172400:exon7:c.C474A:p.F158L	.	het	.	4	132550379	132550379	G	A	het	118.64	18
4	132550386	132550386	0	T	exonic	Dnajc8	.	nonsynonymous SNV	Dnajc8:NM_172400:exon7:c.G481T:p.A161S	.	het	.	4	132550386	132550386	-	T	het	118.60	18
4	132550401	132550401	T	C	exonic	Dnajc8	.	nonsynonymous SNV	Dnajc8:NM_172400:exon7:c.A496C:p.T166P	.	het	.	4	132550401	132550401	T	C	het	719.64	32
4	132580161	132580161	A	T	exonic	Ptafr	.	nonsynonymous SNV	Ptafr:NM_001081211:exon2:c.A861T:p.L287F	.	het	.	4	132580161	132580161	A	T	het	200.64	23
4	132580174	132580174	A	G	exonic	Ptafr	.	nonsynonymous SNV	Ptafr:NM_001081211:exon2:c.T874G:p.Y292D	.	het	.	4	132580174	132580174	A	G	het	89.64	18
4	132580186	132580186	G	T	exonic	Ptafr	.	nonsynonymous SNV	Ptafr:NM_001081211:exon2:c.A886T:p.T296S	.	het	.	4	132580186	132580186	G	T	het	79.64	16
4	132580189	132580189	A	G	exonic	Ptafr	.	nonsynonymous SNV	Ptafr:NM_001081211:exon2:c.A889G:p.K297E	.	het	.	4	132580189	132580189	A	G	het	79.64	16
4	132997445	132997445	T	C	exonic	Fgr	.	nonsynonymous SNV	Fgr:NM_010208:exon9:c.A856C:p.M286L	.	het	.	4	132997445	132997445	T	C	het	31.64	17
4	132997455	132997455	T	C	exonic	Fgr	.	nonsynonymous SNV	Fgr:NM_010208:exon9:c.A866C:p.K289T	.	het	.	4	132997455	132997455	T	C	het	71.64	16
4	132997466	132997466	A	C	exonic	Fgr	.	nonsynonymous SNV	Fgr:NM_010208:exon9:c.G877C:p.E293Q	.	het	.	4	132997466	132997466	A	C	het	664.64	27
4	133062506	133062506	C	A	exonic	Ahdc1	.	nonsynonymous SNV	Ahdc1:NM_146155:exon6:c.T1057A:p.L353M	.	het	.	4	133062506	133062506	C	A	het	37.64	15
4	133062917	133062917	T	C	exonic	Ahdc1	.	nonsynonymous SNV	Ahdc1:NM_146155:exon6:c.T1468C:p.Y490H	.	het	.	4	133062917	133062917	T	C	het	26.64	17
4	133062960	133062960	G	T	exonic	Ahdc1	.	nonsynonymous SNV	Ahdc1:NM_146155:exon6:c.A1511T:p.K504M	.	het	.	4	133062960	133062960	G	T	het	23.64	17
4	133063681	133063681	A	G	exonic	Ahdc1	.	nonsynonymous SNV	Ahdc1:NM_146155:exon6:c.T2232G:p.N744K	.	het	.	4	133063681	133063681	A	G	het	132.64	16
4	133063763	133063763	0	T	exonic	Ahdc1	.	nonsynonymous SNV	Ahdc1:NM_146155:exon6:c.G2314T:p.G772C	.	het	.	4	133063763	133063763	-	T	het	296.60	21
[truncated: 7,266 more rows]
