# Supplementary material for: Shock-Scattering Micro-Histotripsy-Aided Fine Needle Aspiration for Enhanced Biomarker Profiling and Cytopathology
Source: Research Square preprint supplement (doi:10.21203/rs.3.rs-5939271/v1), 2025-04-23
Supplement: Supplementary file 10 [file Supplementary 4 - COSMIC_genes_with_variants_in_tumorSample.xlsx]

## Sheet: Sheet1
GENE_SYMBOL	NAME	COSMIC_GENE_ID	CHROMOSOME	GENOME_START	GENOME_STOP	CHR_BAND	SOMATIC	GERMLINE	TUMOUR_TYPES_SOMATIC	TUMOUR_TYPES_GERMLINE	CANCER_SYNDROME	TISSUE_TYPE	MOLECULAR_GENETICS	ROLE_IN_CANCER	MUTATION_TYPES	TRANSLOCATION_PARTNER	OTHER_GERMLINE_MUT	OTHER_SYNDROME	TIER	SYNONYMS
ABL1	ABL proto-oncogene 1, non-receptor tyrosine kinase	COSG106650	9	130713946	130887675	9q34.12	y	n	CML, ALL, T-ALL			L	Dom	oncogene, fusion	T, Mis	BCR, ETV6, NUP214	n		1	ABL1,ENSG00000097007.17,P00519,25,JTK7,c-ABL,p150
BCR	BCR, RhoGEF and GTPase activating protein	COSG70269	22	23179704	23318037	22q11.23	y	n	CML, ALL, AML			L	Dom	fusion	T	ABL1, FGFR1, JAK2	n		1	BCR,ENSG00000186716.20,P11274,613,ALL,CML,D22S662,PHL
AFDN	afadin, adherens junction formation factor	COSG74504	6	167826922	167972023	6q27	y	n	AL			L	Dom	oncogene, fusion	T	KMT2A	n		1	AFDN,ENSG00000130396.20,4301,AF-6,AF6
AKAP9	A-kinase anchoring protein 9	COSG89677	7	91940867	92110673	7q21.2	y	n	papillary thyroid			E	Dom	fusion	T	BRAF	n		2	AKAP9,ENSG00000127914.16,Q99996,10142,AKAP350,AKAP450,CG-NAP,HYPERION,KIAA0803,LQT11,MU-RMS-40.16A,PPP1R45,PRKA9,YOTIAO
BRAF	B-Raf proto-oncogene, serine/threonine kinase	COSG99109	7	140719327	140924928	7q34	y	n	melanoma, colorectal, papillary thyroid, borderline ovarian, NSCLC, cholangiocarcinoma, pilocytic astrocytoma, Spitzoid tumour, pancreas acinar carcinoma, melanocytic nevus, prostate, gastric			E, O	Dom	oncogene, fusion	Mis, T, O	AKAP9, KIAA1549, CEP88, LSM14A, SND1, FCHSD1, SLC45A3, FAM131B, RNF130, CLCN6, MKRN1, GNAI1, AGTRAP	y	Cardio-facio-cutaneous syndrome	1	BRAF,ENSG00000157764.13,673,BRAF1
ACVR1	activin A receptor type 1	COSG104387	2	157736444	157875862	2q24.1	y	n	DIPG			O	Dom	oncogene	Mis		y	Fibrodysplasia ossificans progressiva	1	ACVR1,ENSG00000115170.13,Q04771,90,ACVR1A,ALK2,SKR1
ACVR1B	activin A receptor type 1B	COSG87372	12	51951667	51997078	12q13.13	y	n	pancreatic cancer			E		TSG	D, F, Mis, N		n		1	ACVR1B,ENSG00000135503.12,P36896,91,ALK4,ActRIB,SKR2
ALK	ALK receptor tyrosine kinase	COSG59677	2	29192774	29921566	2p23.2	y	y	ALCL, NSCLC, neuroblastoma, inflammatory myofibroblastic tumour, Spitzoid tumour	neuroblastoma	familial neuroblastoma	L, E, M	Dom	oncogene, fusion	T, Mis, A	NPM1, TPM3, TFG, TPM4, ATIC, CLTC, MSN, RNF213, CARS, EML4, KIF5B, C2orf22, DCTN1, HIP1, TPR, RANBP2, PPFIBP1, SEC31A, STRN, VCL, C2orf44, KLC1	n		1	ALK,ENSG00000171094.17,Q9UM73,238,CD246
ATIC	5-aminoimidazole-4-carboxamide ribonucleotide formyltransferase/IMP cyclohydrolase	COSG101434	2	215311817	215349773	2q35	y	n	ALCL			L	Dom	fusion	T	ALK	n		1	ATIC,ENSG00000138363.14,P31939,471,AICARFT,IMPCHASE,PURH
BIRC6	baculoviral IAP repeat containing 6	COSG78096	2	32357028	32618899	2p22.3	y	n	melanoma, gastric adenocarcinoma, lung adenocarcinoma			E		oncogene, fusion	T, Mis	ALK	n		2	BIRC6,ENSG00000115760.13,Q9NR09,57448,BRUCE
BMPR1A	bone morphogenetic protein receptor type 1A	COSG95149	10	86756601	86932838	10q23.2	n	y		gastrointestinal polyps	juvenile polyposis	E	Rec	oncogene, TSG	Mis, N, F		n		1	BMPR1A,ENSG00000107779.13,P36894,657,ALK3,CD292
CARS	cysteinyl-tRNA synthetase	COSG73613	11	3000922	3057613	11p15.4	y	n	ALCL			L	Dom	TSG, fusion	T	ALK	n		1	CARS,ENSG00000110619.17,P49589,833,CARS1
APOBEC3B	apolipoprotein B mRNA editing enzyme catalytic subunit 3B	COSG78257	22	38982347	38992804	22q13.1	n	y		breast cancer		E	Rec	oncogene, TSG	D		n		1	APOBEC3B,ENSG00000179750.15,Q9UH17,9582,FLJ21201,PHRBNL
ARHGAP26	Rho GTPase activating protein 26	COSG66814	5	142770377	143229011	5q31.3	y	n	AML, MDS			L	Dom	TSG, fusion	T, F, S	KMT2A	n		1	ARHGAP26,ENSG00000145819.16,Q9UNA1,23092,GRAF,KIAA0621,OPHN1L,OPHN1L1
ARHGAP35	Rho GTPase activating protein 35	COSG59943	19	46918676	47005077	19q13.32	y	n	endometrial carcinoma			E		TSG	N, Mis, F, O		n		1	ARHGAP35,ENSG00000160007.18,Q9NRY4,2909,GRF-1,KIAA1722,P190A,p190ARhoGAP,p190RhoGAP
ARHGEF10	Rho guanine nucleotide exchange factor 10	COSG72704	8	1823976	1958641	8p23.3	y	n	colon cancer			E		TSG	D		n		2	ARHGEF10,ENSG00000104728.15,O15013,9639,Gef10,KIAA0294
ARHGEF10L	Rho guanine nucleotide exchange factor 10 like	COSG64462	1	17539835	17697874	1p36.13	y	n	lymphoma			L		TSG	D		n		2	ARHGEF10L,ENSG00000074964.16,Q9HCE6,55160,FLJ10521,KIAA1626
ARHGEF10L	Rho guanine nucleotide exchange factor 10 like	COSG64462	1	17539835	17697874	1p36.13	y	n	lymphoma			L		TSG	D		n		2	ARHGEF10L,ENSG00000074964.16,Q9HCE6,55160,FLJ10521,KIAA1626
ARID1A	AT-rich interaction domain 1A	COSG71518	1	26693236	26782110	1p36.11	y	n	clear cell ovarian carcinoma, RCC, breast			E	Rec	TSG, fusion	Mis, N, F, S, D, T	MAST2	n		1	ARID1A,ENSG00000117713.19,O14497,8289,B120,BAF250,BAF250a,C10rf4,P270
ARNT	aryl hydrocarbon receptor nuclear translocator	COSG69731	1	150809705	150876768	1q21.3	y	n	AML			L	Dom	oncogene, TSG, fusion	T	ETV6	n		1	ARNT,ENSG00000143437.20,P27540,405,HIF-1beta,bHLHe2
ASXL1	ASXL transcriptional regulator 1	COSG63327	20	32358330	32439319	20q11.21	y	n	MDS, CMML			L	Rec	TSG	F, N, Mis		y	Bohring-Opitz syndrome	1	ASXL1,ENSG00000171456.17,Q8IXJ9,171023,KIAA0978
BAZ1A	bromodomain adjacent to zinc finger domain 1A	COSG114282	14	34752731	34875647	14q13.2	y	n	uterine carcinosarcoma, colon cancer			E		TSG	D		n		2	BAZ1A,ENSG00000198604.10,Q9NRL2,11177,ACF1,WALp1,WCRF180,hACF1
BCL11B	BCL11B, BAF complex component	COSG102032	14	99169287	99271524	14q32.2	y	n	T-ALL			L	Dom	oncogene, TSG, fusion	T	TLX3	n		1	BCL11B,ENSG00000127152.17,Q9C0K0,64919,CTIP-2,CTIP2,hRIT1-alpha
BAP1	BRCA1 associated protein 1	COSG113385	3	52401013	52410350	3p21.1	y	y	uveal melanoma, breast, NSCLC, RCC	mesothelioma, skin and uveal melanoma, kidney cancer	BAP1 tumor predisposition syndrome	E	Rec	TSG	N, Mis, F, S, O		n		1	BAP1,ENSG00000163930.9,Q92560,8314,KIAA0272,UCHL2,hucep-6
BARD1	BRCA1 associated RING domain 1	COSG71483	2	214725646	214809711	2q35	y	y	breast cancer	ovarian cancer, breast cancer, endometrioid cancer		E		TSG	Mis		n		1	BARD1,ENSG00000138376.10,Q99728,580
BRCA1	BRCA1, DNA repair associated	COSG75342	17	43044295	43170245	17q21.31	y	y	ovarian	breast, ovarian	hereditary breast/ovarian cancer	E	Rec	TSG	D, Mis, N, F, S		n		1	BRCA1,ENSG00000012048.21,P38398,672,BRCC1,FANCS,PPP1R53,RNF53
BRIP1	BRCA1 interacting protein C-terminal helicase 1	COSG80352	17	61681266	61863521	17q23.2	n	y		AML, leukaemia, breast	Fanconi anaemia J, breast cancer susceptiblity	L, E	Rec	TSG	F, N, Mis		n		1	BRIP1,ENSG00000136492.8,Q9BX63,83990,BACH1,FANCJ,OF
BRD3	bromodomain containing 3	COSG76553	9	134030305	134068535	9q34.2	y	n	lethal midline carcinoma of young people			E	Dom	oncogene, fusion	T	NUTM1	n		1	BRD3,ENSG00000169925.16,Q15059,8019,KIAA0043,ORFX,RING3L
BUB1B	BUB1 mitotic checkpoint serine/threonine kinase B	COSG78158	15	40161023	40221136	15q15.1	n	y		rhabdomyosarcoma	mosaic variegated aneuploidy	M	Rec	TSG	Mis, N, F, S		n		1	BUB1B,ENSG00000156970.12,O60566,701,BUBR1,Bub1A,MAD3L,SSK1
ALK	ALK receptor tyrosine kinase	COSG59677	2	29192774	29921566	2p23.2	y	y	ALCL, NSCLC, neuroblastoma, inflammatory myofibroblastic tumour, Spitzoid tumour	neuroblastoma	familial neuroblastoma	L, E, M	Dom	oncogene, fusion	T, Mis, A	NPM1, TPM3, TFG, TPM4, ATIC, CLTC, MSN, RNF213, CARS, EML4, KIF5B, C2orf22, DCTN1, HIP1, TPR, RANBP2, PPFIBP1, SEC31A, STRN, VCL, C2orf44, KLC1	n		1	ALK,ENSG00000171094.17,Q9UM73,238,CD246
ASPSCR1	ASPSCR1, UBX domain containing tether for SLC2A4	COSG109748	17	81976807	82017406	17q25.3	y	n	alveolar soft part sarcoma			M	Dom	fusion	T	TFE3	n		1	ASPSCR1,ENSG00000169696.15,Q9BZE9,79058,ASPL,ASPS,TUG,UBXD9,UBXN9
BRCA2	BRCA2, DNA repair associated	COSG68498	13	32315474	32400266	13q13.1	y	y	breast, ovarian, pancreatic	breast, ovarian, pancreatic, leukaemia (FANCB, FANCD1)	hereditary breast/ovarian cancer	L, E	Rec	TSG	D, Mis, N, F, S		n		1	BRCA2,ENSG00000139618.14,P51587,675,BRCC2,FAD,FAD1,XRCC11
CAMTA1	calmodulin binding transcription activator 1	COSG61199	1	6785324	7769706	1p36.31	y	n	epithelioid haemangioendothelioma			M	Dom	TSG, fusion	T	WWTR1	n		1	CAMTA1,ENSG00000171735.18,Q9Y6Y1,23261,KIAA0833
CANT1	calcium activated nucleotidase 1	COSG63866	17	78991717	79009867	17q25.3	y	n	prostate			E	Dom	fusion	T	ETV4	n		1	CANT1,ENSG00000171302.16,Q8WVQ1,124583,SCAN-1,SHAPY
CASP9	caspase 9	COSG102681	1	15490832	15526534	1p36.21	y	n	glioma			O		TSG	D		n		2	CASP9,ENSG00000132906.17,P55211,842,APAF-3,ICE-LAP6,MCH6,PPP1R56
CBFA2T3	CBFA2/RUNX1 translocation partner 3	COSG96429	16	88874858	88977204	16q24.3	y	n	AML			L	Dom	TSG, fusion	T	RUNX1, GLIS2	n		1	CBFA2T3,ENSG00000129993.14,O75081,863,ETO2,MTG16,MTGR2,RUNX1T3,ZMYND4
CCDC6	coiled-coil domain containing 6	COSG108617	10	59788763	59906656	10q21.2	y	n	papillary thyroid, CML, NSCLC			E	Dom	TSG, fusion	T	RET, PDGFRB	n		1	CCDC6,ENSG00000108091.10,Q16204,8030,H4,PTC,TPC
BRAF	B-Raf proto-oncogene, serine/threonine kinase	COSG99109	7	140719327	140924928	7q34	y	n	melanoma, colorectal, papillary thyroid, borderline ovarian, NSCLC, cholangiocarcinoma, pilocytic astrocytoma, Spitzoid tumour, pancreas acinar carcinoma, melanocytic nevus, prostate, gastric			E, O	Dom	oncogene, fusion	Mis, T, O	AKAP9, KIAA1549, CEP88, LSM14A, SND1, FCHSD1, SLC45A3, FAM131B, RNF130, CLCN6, MKRN1, GNAI1, AGTRAP	y	Cardio-facio-cutaneous syndrome	1	BRAF,ENSG00000157764.13,673,BRAF1
ALK	ALK receptor tyrosine kinase	COSG59677	2	29192774	29921566	2p23.2	y	y	ALCL, NSCLC, neuroblastoma, inflammatory myofibroblastic tumour, Spitzoid tumour	neuroblastoma	familial neuroblastoma	L, E, M	Dom	oncogene, fusion	T, Mis, A	NPM1, TPM3, TFG, TPM4, ATIC, CLTC, MSN, RNF213, CARS, EML4, KIF5B, C2orf22, DCTN1, HIP1, TPR, RANBP2, PPFIBP1, SEC31A, STRN, VCL, C2orf44, KLC1	n		1	ALK,ENSG00000171094.17,Q9UM73,238,CD246
CANT1	calcium activated nucleotidase 1	COSG63866	17	78991717	79009867	17q25.3	y	n	prostate			E	Dom	fusion	T	ETV4	n		1	CANT1,ENSG00000171302.16,Q8WVQ1,124583,SCAN-1,SHAPY
BCL6	BCL6, transcription repressor	COSG113725	3	187721377	187745727	3q27.3	y	n	NHL, CLL			L	Dom	oncogene, fusion	T, Mis	IG loci, ZNFN1A1, LCP1, PIM1, TFRC, CIITA, NACA, HSPCB, HSP90AA1, HIST1H4I, IL21R, POU2AF1, RHOH, EIF4A2, SRSF3	n		1	BCL6,ENSG00000113916.17,P41182,604,BCL5,BCL6A,LAZ3,ZBTB27
AXIN2	axin 2	COSG96143	17	65528563	65561647	17q24.1	y	y	colorectal carcinoma, stomach carcinoma, hepatocellular carcinoma	colorectal carcinoma	oligodontia-colorectal cancer syndrome	E	Rec	TSG	Mis, F, N		n		1	AXIN2,ENSG00000168646.12,Q9Y2T1,8313,DKFZp781B0869,MGC126582
BTG2	BTG anti-proliferation factor 2	COSG94281	1	203305491	203309602	1q32.1	y	n	DLBCL			L		TSG	Mis		n		2	BTG2,ENSG00000159388.5,P78543,7832,APRO1,MGC126063,MGC126064,PC3,TIS21
GENE_SYMBOL	NAME	COSMIC_GENE_ID	CHROMOSOME	GENOME_START	GENOME_STOP	CHR_BAND	SOMATIC	GERMLINE	TUMOUR_TYPES_SOMATIC	TUMOUR_TYPES_GERMLINE	CANCER_SYNDROME	TISSUE_TYPE	MOLECULAR_GENETICS	ROLE_IN_CANCER	MUTATION_TYPES	TRANSLOCATION_PARTNER	OTHER_GERMLINE_MUT	OTHER_SYNDROME	TIER	SYNONYMS
APOBEC3B	apolipoprotein B mRNA editing enzyme catalytic subunit 3B	COSG78257	22	38982347	38992804	22q13.1	n	y		breast cancer		E	Rec	oncogene, TSG	D		n		1	APOBEC3B,ENSG00000179750.15,Q9UH17,9582,FLJ21201,PHRBNL
ALK	ALK receptor tyrosine kinase	COSG59677	2	29192774	29921566	2p23.2	y	y	ALCL, NSCLC, neuroblastoma, inflammatory myofibroblastic tumour, Spitzoid tumour	neuroblastoma	familial neuroblastoma	L, E, M	Dom	oncogene, fusion	T, Mis, A	NPM1, TPM3, TFG, TPM4, ATIC, CLTC, MSN, RNF213, CARS, EML4, KIF5B, C2orf22, DCTN1, HIP1, TPR, RANBP2, PPFIBP1, SEC31A, STRN, VCL, C2orf44, KLC1	n		1	ALK,ENSG00000171094.17,Q9UM73,238,CD246
ACKR3	atypical chemokine receptor 3	COSG97311	2	236567787	236582358	2q37.3	y	n	lipoma			M	Dom	oncogene, fusion	T	HMGA2	n		1	ACKR3,ENSG00000144476.5,P25106,57007,GPR159,RDC1
ALDH2	aldehyde dehydrogenase 2 family member	COSG78204	12	111766887	111817529	12q24.12	y	n	leiomyoma			M	Dom	fusion	T	HMGA2	n		2	ALDH2,ENSG00000111275.12,P05091,217
CAMTA1	calmodulin binding transcription activator 1	COSG61199	1	6785324	7769706	1p36.31	y	n	epithelioid haemangioendothelioma			M	Dom	TSG, fusion	T	WWTR1	n		1	CAMTA1,ENSG00000171735.18,Q9Y6Y1,23261,KIAA0833
CBFB	core-binding factor subunit beta	COSG115535	16	67029116	67101058	16q22.1	y	n	AML			L	Dom	TSG, fusion	T	MYH11	n		1	CBFB,ENSG00000067955.13,Q13951,865,PEBP2B
BCL6	BCL6, transcription repressor	COSG113725	3	187721377	187745727	3q27.3	y	n	NHL, CLL			L	Dom	oncogene, fusion	T, Mis	IG loci, ZNFN1A1, LCP1, PIM1, TFRC, CIITA, NACA, HSPCB, HSP90AA1, HIST1H4I, IL21R, POU2AF1, RHOH, EIF4A2, SRSF3	n		1	BCL6,ENSG00000113916.17,P41182,604,BCL5,BCL6A,LAZ3,ZBTB27
BRAF	B-Raf proto-oncogene, serine/threonine kinase	COSG99109	7	140719327	140924928	7q34	y	n	melanoma, colorectal, papillary thyroid, borderline ovarian, NSCLC, cholangiocarcinoma, pilocytic astrocytoma, Spitzoid tumour, pancreas acinar carcinoma, melanocytic nevus, prostate, gastric			E, O	Dom	oncogene, fusion	Mis, T, O	AKAP9, KIAA1549, CEP88, LSM14A, SND1, FCHSD1, SLC45A3, FAM131B, RNF130, CLCN6, MKRN1, GNAI1, AGTRAP	y	Cardio-facio-cutaneous syndrome	1	BRAF,ENSG00000157764.13,673,BRAF1
ALK	ALK receptor tyrosine kinase	COSG59677	2	29192774	29921566	2p23.2	y	y	ALCL, NSCLC, neuroblastoma, inflammatory myofibroblastic tumour, Spitzoid tumour	neuroblastoma	familial neuroblastoma	L, E, M	Dom	oncogene, fusion	T, Mis, A	NPM1, TPM3, TFG, TPM4, ATIC, CLTC, MSN, RNF213, CARS, EML4, KIF5B, C2orf22, DCTN1, HIP1, TPR, RANBP2, PPFIBP1, SEC31A, STRN, VCL, C2orf44, KLC1	n		1	ALK,ENSG00000171094.17,Q9UM73,238,CD246
ABL1	ABL proto-oncogene 1, non-receptor tyrosine kinase	COSG106650	9	130713946	130887675	9q34.12	y	n	CML, ALL, T-ALL			L	Dom	oncogene, fusion	T, Mis	BCR, ETV6, NUP214	n		1	ABL1,ENSG00000097007.17,P00519,25,JTK7,c-ABL,p150
CCDC6	coiled-coil domain containing 6	COSG108617	10	59788763	59906656	10q21.2	y	n	papillary thyroid, CML, NSCLC			E	Dom	TSG, fusion	T	RET, PDGFRB	n		1	CCDC6,ENSG00000108091.10,Q16204,8030,H4,PTC,TPC
BCL6	BCL6, transcription repressor	COSG113725	3	187721377	187745727	3q27.3	y	n	NHL, CLL			L	Dom	oncogene, fusion	T, Mis	IG loci, ZNFN1A1, LCP1, PIM1, TFRC, CIITA, NACA, HSPCB, HSP90AA1, HIST1H4I, IL21R, POU2AF1, RHOH, EIF4A2, SRSF3	n		1	BCL6,ENSG00000113916.17,P41182,604,BCL5,BCL6A,LAZ3,ZBTB27
ALK	ALK receptor tyrosine kinase	COSG59677	2	29192774	29921566	2p23.2	y	y	ALCL, NSCLC, neuroblastoma, inflammatory myofibroblastic tumour, Spitzoid tumour	neuroblastoma	familial neuroblastoma	L, E, M	Dom	oncogene, fusion	T, Mis, A	NPM1, TPM3, TFG, TPM4, ATIC, CLTC, MSN, RNF213, CARS, EML4, KIF5B, C2orf22, DCTN1, HIP1, TPR, RANBP2, PPFIBP1, SEC31A, STRN, VCL, C2orf44, KLC1	n		1	ALK,ENSG00000171094.17,Q9UM73,238,CD246
BRCA2	BRCA2, DNA repair associated	COSG68498	13	32315474	32400266	13q13.1	y	y	breast, ovarian, pancreatic	breast, ovarian, pancreatic, leukaemia (FANCB, FANCD1)	hereditary breast/ovarian cancer	L, E	Rec	TSG	D, Mis, N, F, S		n		1	BRCA2,ENSG00000139618.14,P51587,675,BRCC2,FAD,FAD1,XRCC11
BRCA1	BRCA1, DNA repair associated	COSG75342	17	43044295	43170245	17q21.31	y	y	ovarian	breast, ovarian	hereditary breast/ovarian cancer	E	Rec	TSG	D, Mis, N, F, S		n		1	BRCA1,ENSG00000012048.21,P38398,672,BRCC1,FANCS,PPP1R53,RNF53
CBL	Cbl proto-oncogene	COSG108842	11	119206276	119313926	11q23.3	y	n	AML, JMML, MDS			L	Dom/Rec	oncogene, TSG, fusion	T, Mis, S, O	KMT2A	n		1	CBL,ENSG00000110395.6,P22681,867,RNF55,c-Cbl
CBLB	Cbl proto-oncogene B	COSG80246	3	105655461	105869552	3q13.11	y	n	AML			L	Rec	TSG	Mis, S		n		1	CBLB,ENSG00000114423.19,Q13191,868,Cbl-b,RNF56
CBLC	Cbl proto-oncogene C	COSG97247	19	44777869	44800634	19q13.32	y	n	cervical SCC, malignant melanoma			E, O			A, Mis, N		n		2	CBLC,ENSG00000142273.11,Q9ULV8,23624,CBL-3,CBL-SL,RNF57
ALK	ALK receptor tyrosine kinase	COSG59677	2	29192774	29921566	2p23.2	y	y	ALCL, NSCLC, neuroblastoma, inflammatory myofibroblastic tumour, Spitzoid tumour	neuroblastoma	familial neuroblastoma	L, E, M	Dom	oncogene, fusion	T, Mis, A	NPM1, TPM3, TFG, TPM4, ATIC, CLTC, MSN, RNF213, CARS, EML4, KIF5B, C2orf22, DCTN1, HIP1, TPR, RANBP2, PPFIBP1, SEC31A, STRN, VCL, C2orf44, KLC1	n		1	ALK,ENSG00000171094.17,Q9UM73,238,CD246
BRAF	B-Raf proto-oncogene, serine/threonine kinase	COSG99109	7	140719327	140924928	7q34	y	n	melanoma, colorectal, papillary thyroid, borderline ovarian, NSCLC, cholangiocarcinoma, pilocytic astrocytoma, Spitzoid tumour, pancreas acinar carcinoma, melanocytic nevus, prostate, gastric			E, O	Dom	oncogene, fusion	Mis, T, O	AKAP9, KIAA1549, CEP88, LSM14A, SND1, FCHSD1, SLC45A3, FAM131B, RNF130, CLCN6, MKRN1, GNAI1, AGTRAP	y	Cardio-facio-cutaneous syndrome	1	BRAF,ENSG00000157764.13,673,BRAF1
BTG1	BTG anti-proliferation factor 1	COSG72977	12	92140278	92145897	12q21.33	y	n	B-CLL			L	Dom	TSG, fusion	T	MYC	n		1	BTG1,ENSG00000133639.4,P62324,694,APRO2
BTG2	BTG anti-proliferation factor 2	COSG94281	1	203305491	203309602	1q32.1	y	n	DLBCL			L		TSG	Mis		n		2	BTG2,ENSG00000159388.5,P78543,7832,APRO1,MGC126063,MGC126064,PC3,TIS21
CBFA2T3	CBFA2/RUNX1 translocation partner 3	COSG96429	16	88874858	88977204	16q24.3	y	n	AML			L	Dom	TSG, fusion	T	RUNX1, GLIS2	n		1	CBFA2T3,ENSG00000129993.14,O75081,863,ETO2,MTG16,MTGR2,RUNX1T3,ZMYND4
BTK	Bruton tyrosine kinase	COSG96537	X	101349447	101390796	Xq22.1	y	n	CLL, mantle cell lymphoma, WM			L	Dom	oncogene, TSG	Mis		y	agammaglobulinemia	1	BTK,ENSG00000010671.15,Q06187,695,ATK,PSCTK1,XLA
BUB1B	BUB1 mitotic checkpoint serine/threonine kinase B	COSG78158	15	40161023	40221136	15q15.1	n	y		rhabdomyosarcoma	mosaic variegated aneuploidy	M	Rec	TSG	Mis, N, F, S		n		1	BUB1B,ENSG00000156970.12,O60566,701,BUBR1,Bub1A,MAD3L,SSK1

## Sheet: Melanoma Associated Mutations
Gene Acronym	Chromosome location	Somatic Cancer Associations	Germline Cancer Associations	Role in Cancer
BAP1	Chr3:52401013-52410350	uveal melanoma, breast, NSCLC, RCC	mesothelioma, skin and uveal melanoma, kidney cancer	TSG
BIRC6	Chr2:32357028-32618899	melanoma, gastric adenocarcinoma, lung adenocarcinoma		oncogene, fusion
BRAF	Chr7:140719327-140924928	melanoma, colorectal, papillary thyroid, borderline ovarian, NSCLC, cholangiocarcinoma, pilocytic astrocytoma, Spitzoid tumour, pancreas acinar carcinoma, melanocytic nevus, prostate, gastric		oncogene, fusion
CBLC	Chr19:44777869-44800634	cervical SCC, malignant melanoma
