# Supplementary material for: Shock-Scattering Micro-Histotripsy-Aided Fine Needle Aspiration for Enhanced Biomarker Profiling and Cytopathology
Source: Research Square preprint supplement (doi:10.21203/rs.3.rs-5939271/v1), 2025-04-23
Supplement: Supplementary file 13 [file Supplementary 5 - COSMIC_genes_with_variants_in_histoSample.xlsx]

## Sheet: Sheet1
GENE_SYMBOL	NAME	COSMIC_GENE_ID	CHROMOSOME	GENOME_START	GENOME_STOP	CHR_BAND	SOMATIC	GERMLINE	TUMOUR_TYPES_SOMATIC	TUMOUR_TYPES_GERMLINE	CANCER_SYNDROME	TISSUE_TYPE	MOLECULAR_GENETICS	ROLE_IN_CANCER	MUTATION_TYPES	TRANSLOCATION_PARTNER	OTHER_GERMLINE_MUT	OTHER_SYNDROME	TIER	SYNONYMS
ABI1	abl interactor 1	COSG100962	10	26746593	26861087	10p12.1	y	n	AML			L	Dom	TSG, fusion	T	KMT2A	n		1	ABI1,ENSG00000136754.17,Q8IZP0,10006,ABI-1,E3B1
ACSL3	acyl-CoA synthetase long chain family member 3	COSG110896	2	222860934	222944639	2q36.1	y	n	prostate			E	Dom	fusion	T	ETV1	n		1	ACSL3,ENSG00000123983.13,O95573,2181,ACS3,PRO2194
AFDN	afadin, adherens junction formation factor	COSG74504	6	167826922	167972023	6q27	y	n	AL			L	Dom	oncogene, fusion	T	KMT2A	n		1	AFDN,ENSG00000130396.20,4301,AF-6,AF6
AKAP9	A-kinase anchoring protein 9	COSG89677	7	91940867	92110673	7q21.2	y	n	papillary thyroid			E	Dom	fusion	T	BRAF	n		2	AKAP9,ENSG00000127914.16,Q99996,10142,AKAP350,AKAP450,CG-NAP,HYPERION,KIAA0803,LQT11,MU-RMS-40.16A,PPP1R45,PRKA9,YOTIAO
ALDH2	aldehyde dehydrogenase 2 family member	COSG78204	12	111766887	111817529	12q24.12	y	n	leiomyoma			M	Dom	fusion	T	HMGA2	n		2	ALDH2,ENSG00000111275.12,P05091,217
ACVR1	activin A receptor type 1	COSG104387	2	157736444	157875862	2q24.1	y	n	DIPG			O	Dom	oncogene	Mis		y	Fibrodysplasia ossificans progressiva	1	ACVR1,ENSG00000115170.13,Q04771,90,ACVR1A,ALK2,SKR1
ACVR1B	activin A receptor type 1B	COSG87372	12	51951667	51997078	12q13.13	y	n	pancreatic cancer			E		TSG	D, F, Mis, N		n		1	ACVR1B,ENSG00000135503.12,P36896,91,ALK4,ActRIB,SKR2
ALK	ALK receptor tyrosine kinase	COSG59677	2	29192774	29921566	2p23.2	y	y	ALCL, NSCLC, neuroblastoma, inflammatory myofibroblastic tumour, Spitzoid tumour	neuroblastoma	familial neuroblastoma	L, E, M	Dom	oncogene, fusion	T, Mis, A	NPM1, TPM3, TFG, TPM4, ATIC, CLTC, MSN, RNF213, CARS, EML4, KIF5B, C2orf22, DCTN1, HIP1, TPR, RANBP2, PPFIBP1, SEC31A, STRN, VCL, C2orf44, KLC1	n		1	ALK,ENSG00000171094.17,Q9UM73,238,CD246
ATIC	5-aminoimidazole-4-carboxamide ribonucleotide formyltransferase/IMP cyclohydrolase	COSG101434	2	215311817	215349773	2q35	y	n	ALCL			L	Dom	fusion	T	ALK	n		1	ATIC,ENSG00000138363.14,P31939,471,AICARFT,IMPCHASE,PURH
BIRC6	baculoviral IAP repeat containing 6	COSG78096	2	32357028	32618899	2p22.3	y	n	melanoma, gastric adenocarcinoma, lung adenocarcinoma			E		oncogene, fusion	T, Mis	ALK	n		2	BIRC6,ENSG00000115760.13,Q9NR09,57448,BRUCE
BMPR1A	bone morphogenetic protein receptor type 1A	COSG95149	10	86756601	86932838	10q23.2	n	y		gastrointestinal polyps	juvenile polyposis	E	Rec	oncogene, TSG	Mis, N, F		n		1	BMPR1A,ENSG00000107779.13,P36894,657,ALK3,CD292
CARS	cysteinyl-tRNA synthetase	COSG73613	11	3000922	3057613	11p15.4	y	n	ALCL			L	Dom	TSG, fusion	T	ALK	n		1	CARS,ENSG00000110619.17,P49589,833,CARS1
CAMTA1	calmodulin binding transcription activator 1	COSG61199	1	6785324	7769706	1p36.31	y	n	epithelioid haemangioendothelioma			M	Dom	TSG, fusion	T	WWTR1	n		1	CAMTA1,ENSG00000171735.18,Q9Y6Y1,23261,KIAA0833
ANK1	ankyrin 1	COSG110999	8	41653220	41896762	8p11.21	y	n	CCRCC			E			Mis		n		2	ANK1,ENSG00000029534.20,P16157,286,SPH1
A1CF	APOBEC1 complementation factor	COSG68236	10	50799409	50885675	10q11.23	y	n	melanoma			E		oncogene	Mis		n		2	A1CF,ENSG00000148584.14,29974,ACF,ACF64,ACF65,APOBEC1CF,ASP
APOBEC3B	apolipoprotein B mRNA editing enzyme catalytic subunit 3B	COSG78257	22	38982347	38992804	22q13.1	n	y		breast cancer		E	Rec	oncogene, TSG	D		n		1	APOBEC3B,ENSG00000179750.15,Q9UH17,9582,FLJ21201,PHRBNL
ARHGAP35	Rho GTPase activating protein 35	COSG59943	19	46918676	47005077	19q13.32	y	n	endometrial carcinoma			E		TSG	N, Mis, F, O		n		1	ARHGAP35,ENSG00000160007.18,Q9NRY4,2909,GRF-1,KIAA1722,P190A,p190ARhoGAP,p190RhoGAP
ARID1A	AT-rich interaction domain 1A	COSG71518	1	26693236	26782110	1p36.11	y	n	clear cell ovarian carcinoma, RCC, breast			E	Rec	TSG, fusion	Mis, N, F, S, D, T	MAST2	n		1	ARID1A,ENSG00000117713.19,O14497,8289,B120,BAF250,BAF250a,C10rf4,P270
ASPM	abnormal spindle microtubule assembly	COSG93625	1	197084128	197146694	1q31.3	y	y	breast cancer, lung cancer, endometrial cancer, melanoma		nevoid basal cell carcinoma syndrome	E, O			A, F, Mis, N		n		2	ASPM,ENSG00000066279.17,Q8IZT6,259266,ASP,Calmbp1,FLJ10517,FLJ10549
ATM	ATM serine/threonine kinase	COSG89944	11	108222484	108369102	11q22.3	y	y	T-PLL	leukaemia, lymphoma, medulloblastoma, glioma	ataxia-telangiectasia	L, O	Rec	TSG	D, Mis, N, F, S		n		1	ATM,ENSG00000149311.18,Q13315,472,TEL1,TELO1
ATR	ATR serine/threonine kinase	COSG73559	3	142449235	142578826	3q23	y	y	endometrial, gastric, epithelial ovarian, myeloma	oropharyngeal	familial cutaneous telangiectasia and cancer syndrome	E, L	Dom	TSG	F, Mis		y	Seckel syndrome 1	1	ATR,ENSG00000175054.14,Q13535,545,FRP1,MEC1,SCKL,SCKL1
ATRX	ATRX, chromatin remodeler	COSG106026	X	77504878	77786269	Xq21.1	y	n	pancreatic neuroendocrine tumours, paediatric GBM			E	Rec	TSG	Mis, F, N		y	ATR-X (alpha thalassemia/mental retardation) syndrome	1	ATRX,ENSG00000085224.21,P46100,546,XH2,XNP
ATRX	ATRX, chromatin remodeler	COSG106026	X	77504878	77786269	Xq21.1	y	n	pancreatic neuroendocrine tumours, paediatric GBM			E	Rec	TSG	Mis, F, N		y	ATR-X (alpha thalassemia/mental retardation) syndrome	1	ATRX,ENSG00000085224.21,P46100,546,XH2,XNP
AXIN2	axin 2	COSG96143	17	65528563	65561647	17q24.1	y	y	colorectal carcinoma, stomach carcinoma, hepatocellular carcinoma	colorectal carcinoma	oligodontia-colorectal cancer syndrome	E	Rec	TSG	Mis, F, N		n		1	AXIN2,ENSG00000168646.12,Q9Y2T1,8313,DKFZp781B0869,MGC126582
BAZ1A	bromodomain adjacent to zinc finger domain 1A	COSG114282	14	34752731	34875647	14q13.2	y	n	uterine carcinosarcoma, colon cancer			E		TSG	D		n		2	BAZ1A,ENSG00000198604.10,Q9NRL2,11177,ACF1,WALp1,WCRF180,hACF1
BCL9L	B cell CLL/lymphoma 9 like	COSG105158	11	118893875	118925608	11q23.3	y	n	colorectal cancer, endometrial carcinoma, gastric cancer			E		oncogene, TSG	Mis, F		n		1	BCL9L,ENSG00000186174.12,Q86UU0,283149,DLNB11
BCOR	BCL6 corepressor	COSG64323	X	40049815	40177329	Xp11.4	y	n	retinoblastoma, AML, APL (translocation)			L, M	Rec	TSG, fusion	F, N, S, T	RARA	y	Oculo-facio-cardio-dental genetic	1	BCOR,ENSG00000183337.16,Q6W2J9,54880,FLJ20285,KIAA1575
BCORL1	BCL6 corepressor like 1	COSG92901	X	129981107	130058083	Xq26.1	y	n	AML, HNSCC			E, L		oncogene, TSG	Mis, N, F		n		1	BCORL1,ENSG00000085185.15,Q5H9F3,63035,FLJ11362
BIRC6	baculoviral IAP repeat containing 6	COSG78096	2	32357028	32618899	2p22.3	y	n	melanoma, gastric adenocarcinoma, lung adenocarcinoma			E		oncogene, fusion	T, Mis	ALK	n		2	BIRC6,ENSG00000115760.13,Q9NR09,57448,BRUCE
BLM	BLM RecQ like helicase	COSG113995	15	90717327	90816165	15q26.1	n	y		leukaemia, lymphoma, skin squamous cell, other tumour types	Bloom syndrome	L, E	Rec	TSG	Mis, N, F		n		1	BLM,ENSG00000197299.10,P54132,641,BS,RECQ2,RECQL3
BAP1	BRCA1 associated protein 1	COSG113385	3	52401013	52410350	3p21.1	y	y	uveal melanoma, breast, NSCLC, RCC	mesothelioma, skin and uveal melanoma, kidney cancer	BAP1 tumor predisposition syndrome	E	Rec	TSG	N, Mis, F, S, O		n		1	BAP1,ENSG00000163930.9,Q92560,8314,KIAA0272,UCHL2,hucep-6
BARD1	BRCA1 associated RING domain 1	COSG71483	2	214725646	214809711	2q35	y	y	breast cancer	ovarian cancer, breast cancer, endometrioid cancer		E		TSG	Mis		n		1	BARD1,ENSG00000138376.10,Q99728,580
BRCA1	BRCA1, DNA repair associated	COSG75342	17	43044295	43170245	17q21.31	y	y	ovarian	breast, ovarian	hereditary breast/ovarian cancer	E	Rec	TSG	D, Mis, N, F, S		n		1	BRCA1,ENSG00000012048.21,P38398,672,BRCC1,FANCS,PPP1R53,RNF53
BRIP1	BRCA1 interacting protein C-terminal helicase 1	COSG80352	17	61681266	61863521	17q23.2	n	y		AML, leukaemia, breast	Fanconi anaemia J, breast cancer susceptiblity	L, E	Rec	TSG	F, N, Mis		n		1	BRIP1,ENSG00000136492.8,Q9BX63,83990,BACH1,FANCJ,OF
BRCA2	BRCA2, DNA repair associated	COSG68498	13	32315474	32400266	13q13.1	y	y	breast, ovarian, pancreatic	breast, ovarian, pancreatic, leukaemia (FANCB, FANCD1)	hereditary breast/ovarian cancer	L, E	Rec	TSG	D, Mis, N, F, S		n		1	BRCA2,ENSG00000139618.14,P51587,675,BRCC2,FAD,FAD1,XRCC11
BUB1B	BUB1 mitotic checkpoint serine/threonine kinase B	COSG78158	15	40161023	40221136	15q15.1	n	y		rhabdomyosarcoma	mosaic variegated aneuploidy	M	Rec	TSG	Mis, N, F, S		n		1	BUB1B,ENSG00000156970.12,O60566,701,BUBR1,Bub1A,MAD3L,SSK1
CALR	calreticulin	COSG80775	19	12938578	12944489	19p13.13	y	n	MPN, MDS			L	Dom	oncogene	F, Mis		n		1	CALR,ENSG00000179218.13,P27797,811,CRT,FLJ26680,RO,SSA,cC1qR
CAMTA1	calmodulin binding transcription activator 1	COSG61199	1	6785324	7769706	1p36.31	y	n	epithelioid haemangioendothelioma			M	Dom	TSG, fusion	T	WWTR1	n		1	CAMTA1,ENSG00000171735.18,Q9Y6Y1,23261,KIAA0833
ATIC	5-aminoimidazole-4-carboxamide ribonucleotide formyltransferase/IMP cyclohydrolase	COSG101434	2	215311817	215349773	2q35	y	n	ALCL			L	Dom	fusion	T	ALK	n		1	ATIC,ENSG00000138363.14,P31939,471,AICARFT,IMPCHASE,PURH
CBL	Cbl proto-oncogene	COSG108842	11	119206276	119313926	11q23.3	y	n	AML, JMML, MDS			L	Dom/Rec	oncogene, TSG, fusion	T, Mis, S, O	KMT2A	n		1	CBL,ENSG00000110395.6,P22681,867,RNF55,c-Cbl
CBLB	Cbl proto-oncogene B	COSG80246	3	105655461	105869552	3q13.11	y	n	AML			L	Rec	TSG	Mis, S		n		1	CBLB,ENSG00000114423.19,Q13191,868,Cbl-b,RNF56
CBLC	Cbl proto-oncogene C	COSG97247	19	44777869	44800634	19q13.32	y	n	cervical SCC, malignant melanoma			E, O			A, Mis, N		n		2	CBLC,ENSG00000142273.11,Q9ULV8,23624,CBL-3,CBL-SL,RNF57
CCDC6	coiled-coil domain containing 6	COSG108617	10	59788763	59906656	10q21.2	y	n	papillary thyroid, CML, NSCLC			E	Dom	TSG, fusion	T	RET, PDGFRB	n		1	CCDC6,ENSG00000108091.10,Q16204,8030,H4,PTC,TPC
BCL6	BCL6, transcription repressor	COSG113725	3	187721377	187745727	3q27.3	y	n	NHL, CLL			L	Dom	oncogene, fusion	T, Mis	IG loci, ZNFN1A1, LCP1, PIM1, TFRC, CIITA, NACA, HSPCB, HSP90AA1, HIST1H4I, IL21R, POU2AF1, RHOH, EIF4A2, SRSF3	n		1	BCL6,ENSG00000113916.17,P41182,604,BCL5,BCL6A,LAZ3,ZBTB27
C15orf65	chromosome 15 open reading frame 65	COSG63238	15	55408548	55418764	15q21.3	y	n	PMBL, Hodgkin lymphoma			L	Dom	fusion	T	CIITA	n		2	C15orf65,ENSG00000261652.2,H3BRN8,145788,FLJ27352
BRAF	B-Raf proto-oncogene, serine/threonine kinase	COSG99109	7	140719327	140924928	7q34	y	n	melanoma, colorectal, papillary thyroid, borderline ovarian, NSCLC, cholangiocarcinoma, pilocytic astrocytoma, Spitzoid tumour, pancreas acinar carcinoma, melanocytic nevus, prostate, gastric			E, O	Dom	oncogene, fusion	Mis, T, O	AKAP9, KIAA1549, CEP88, LSM14A, SND1, FCHSD1, SLC45A3, FAM131B, RNF130, CLCN6, MKRN1, GNAI1, AGTRAP	y	Cardio-facio-cutaneous syndrome	1	BRAF,ENSG00000157764.13,673,BRAF1
ARID2	AT-rich interaction domain 2	COSG89256	12	45729665	45908040	12q12	y	n	hepatocellular carcinoma			E	Rec	TSG	N, S, F		n		1	ARID2,ENSG00000189079.15,Q68CP9,196528,BAF200,DKFZp686G052,FLJ30619,KIAA1557
BCL6	BCL6, transcription repressor	COSG113725	3	187721377	187745727	3q27.3	y	n	NHL, CLL			L	Dom	oncogene, fusion	T, Mis	IG loci, ZNFN1A1, LCP1, PIM1, TFRC, CIITA, NACA, HSPCB, HSP90AA1, HIST1H4I, IL21R, POU2AF1, RHOH, EIF4A2, SRSF3	n		1	BCL6,ENSG00000113916.17,P41182,604,BCL5,BCL6A,LAZ3,ZBTB27
CASP3	caspase 3	COSG65355	4	184627696	184649509	4q35.1	y	n	ovarian cancer			E		TSG	D		n		2	CASP3,ENSG00000164305.18,P42574,836,CPP32,CPP32B,Yama,apopain
ACSL3	acyl-CoA synthetase long chain family member 3	COSG110896	2	222860934	222944639	2q36.1	y	n	prostate			E	Dom	fusion	T	ETV1	n		1	ACSL3,ENSG00000123983.13,O95573,2181,ACS3,PRO2194
ATF1	activating transcription factor 1	COSG90645	12	50763710	50821122	12q13.12	y	n	malignant melanoma of soft parts, angiomatoid fibrous histiocytoma			E, M	Dom	oncogene, fusion	T	EWSR1, FUS	n		1	ATF1,ENSG00000123268.8,P18846,466,TREB36
BCL11A	BCL11A, BAF complex component	COSG82877	2	60450520	60555154	2p16.1	y	n	B-CLL			L	Dom	oncogene, fusion	T	IGH	n		1	BCL11A,ENSG00000119866.21,53335,BCL11A-L,BCL11A-S,BCL11A-XL,CTIP1,HBFQTL5,ZNF856
BCLAF1	BCL2 associated transcription factor 1	COSG107886	6	136256627	136289851	6q23.3	y	n	melanoma, SCC			E			Mis		n		2	BCLAF1,ENSG00000029363.16,Q9NYF8,9774,BTF,KIAA0164
ATP2B3	ATPase plasma membrane Ca2+ transporting 3	COSG102707	X	153517676	153582939	Xq28	y	n	adrenal aldosterone producing adenoma			E	Dom	TSG	O		n		1	ATP2B3,ENSG00000067842.17,Q16720,492,CFAP39,PMCA3
AXIN2	axin 2	COSG96143	17	65528563	65561647	17q24.1	y	y	colorectal carcinoma, stomach carcinoma, hepatocellular carcinoma	colorectal carcinoma	oligodontia-colorectal cancer syndrome	E	Rec	TSG	Mis, F, N		n		1	AXIN2,ENSG00000168646.12,Q9Y2T1,8313,DKFZp781B0869,MGC126582
BTG2	BTG anti-proliferation factor 2	COSG94281	1	203305491	203309602	1q32.1	y	n	DLBCL			L		TSG	Mis		n		2	BTG2,ENSG00000159388.5,P78543,7832,APRO1,MGC126063,MGC126064,PC3,TIS21
CBFA2T3	CBFA2/RUNX1 translocation partner 3	COSG96429	16	88874858	88977204	16q24.3	y	n	AML			L	Dom	TSG, fusion	T	RUNX1, GLIS2	n		1	CBFA2T3,ENSG00000129993.14,O75081,863,ETO2,MTG16,MTGR2,RUNX1T3,ZMYND4
ACKR3	atypical chemokine receptor 3	COSG97311	2	236567787	236582358	2q37.3	y	n	lipoma			M	Dom	oncogene, fusion	T	HMGA2	n		1	ACKR3,ENSG00000144476.5,P25106,57007,GPR159,RDC1
GENE_SYMBOL	NAME	COSMIC_GENE_ID	CHROMOSOME	GENOME_START	GENOME_STOP	CHR_BAND	SOMATIC	GERMLINE	TUMOUR_TYPES_SOMATIC	TUMOUR_TYPES_GERMLINE	CANCER_SYNDROME	TISSUE_TYPE	MOLECULAR_GENETICS	ROLE_IN_CANCER	MUTATION_TYPES	TRANSLOCATION_PARTNER	OTHER_GERMLINE_MUT	OTHER_SYNDROME	TIER	SYNONYMS
APOBEC3B	apolipoprotein B mRNA editing enzyme catalytic subunit 3B	COSG78257	22	38982347	38992804	22q13.1	n	y		breast cancer		E	Rec	oncogene, TSG	D		n		1	APOBEC3B,ENSG00000179750.15,Q9UH17,9582,FLJ21201,PHRBNL
ABI1	abl interactor 1	COSG100962	10	26746593	26861087	10p12.1	y	n	AML			L	Dom	TSG, fusion	T	KMT2A	n		1	ABI1,ENSG00000136754.17,Q8IZP0,10006,ABI-1,E3B1
AFDN	afadin, adherens junction formation factor	COSG74504	6	167826922	167972023	6q27	y	n	AL			L	Dom	oncogene, fusion	T	KMT2A	n		1	AFDN,ENSG00000130396.20,4301,AF-6,AF6
AFF1	AF4/FMR2 family member 1	COSG69615	4	86935002	87141054	4q22.1	y	n	AL			L	Dom	fusion	T	KMT2A	n		1	AFF1,ENSG00000172493.20,P51825,4299,AF-4,AF4
AFF3	AF4/FMR2 family member 3	COSG86784	2	99545419	100142739	2q11.2	y	n	ALL, T-ALL			L	Dom	oncogene, fusion	T	KMT2A, RUNX1	n		1	AFF3,ENSG00000144218.18,P51826,3899,MLLT2-like
AFF4	AF4/FMR2 family member 4	COSG73994	5	132875379	132963634	5q31.1	y	n	ALL			L	Dom	oncogene, fusion	T	KMT2A	n		1	AFF4,ENSG00000072364.12,Q9UHB7,27125,AF5Q31,MCEF
ARHGAP26	Rho GTPase activating protein 26	COSG66814	5	142770377	143229011	5q31.3	y	n	AML, MDS			L	Dom	TSG, fusion	T, F, S	KMT2A	n		1	ARHGAP26,ENSG00000145819.16,Q9UNA1,23092,GRAF,KIAA0621,OPHN1L,OPHN1L1
ARHGEF12	Rho guanine nucleotide exchange factor 12	COSG109622	11	120336914	120489936	11q23.3	y	n	AML			L	Dom	TSG, fusion	T	KMT2A	n		1	ARHGEF12,ENSG00000196914.8,Q9NZN5,23365,KIAA0382,LARG
CBL	Cbl proto-oncogene	COSG108842	11	119206276	119313926	11q23.3	y	n	AML, JMML, MDS			L	Dom/Rec	oncogene, TSG, fusion	T, Mis, S, O	KMT2A	n		1	CBL,ENSG00000110395.6,P22681,867,RNF55,c-Cbl
BCL6	BCL6, transcription repressor	COSG113725	3	187721377	187745727	3q27.3	y	n	NHL, CLL			L	Dom	oncogene, fusion	T, Mis	IG loci, ZNFN1A1, LCP1, PIM1, TFRC, CIITA, NACA, HSPCB, HSP90AA1, HIST1H4I, IL21R, POU2AF1, RHOH, EIF4A2, SRSF3	n		1	BCL6,ENSG00000113916.17,P41182,604,BCL5,BCL6A,LAZ3,ZBTB27
CBFB	core-binding factor subunit beta	COSG115535	16	67029116	67101058	16q22.1	y	n	AML			L	Dom	TSG, fusion	T	MYH11	n		1	CBFB,ENSG00000067955.13,Q13951,865,PEBP2B
BCL6	BCL6, transcription repressor	COSG113725	3	187721377	187745727	3q27.3	y	n	NHL, CLL			L	Dom	oncogene, fusion	T, Mis	IG loci, ZNFN1A1, LCP1, PIM1, TFRC, CIITA, NACA, HSPCB, HSP90AA1, HIST1H4I, IL21R, POU2AF1, RHOH, EIF4A2, SRSF3	n		1	BCL6,ENSG00000113916.17,P41182,604,BCL5,BCL6A,LAZ3,ZBTB27
ALK	ALK receptor tyrosine kinase	COSG59677	2	29192774	29921566	2p23.2	y	y	ALCL, NSCLC, neuroblastoma, inflammatory myofibroblastic tumour, Spitzoid tumour	neuroblastoma	familial neuroblastoma	L, E, M	Dom	oncogene, fusion	T, Mis, A	NPM1, TPM3, TFG, TPM4, ATIC, CLTC, MSN, RNF213, CARS, EML4, KIF5B, C2orf22, DCTN1, HIP1, TPR, RANBP2, PPFIBP1, SEC31A, STRN, VCL, C2orf44, KLC1	n		1	ALK,ENSG00000171094.17,Q9UM73,238,CD246
ABL1	ABL proto-oncogene 1, non-receptor tyrosine kinase	COSG106650	9	130713946	130887675	9q34.12	y	n	CML, ALL, T-ALL			L	Dom	oncogene, fusion	T, Mis	BCR, ETV6, NUP214	n		1	ABL1,ENSG00000097007.17,P00519,25,JTK7,c-ABL,p150
BCL6	BCL6, transcription repressor	COSG113725	3	187721377	187745727	3q27.3	y	n	NHL, CLL			L	Dom	oncogene, fusion	T, Mis	IG loci, ZNFN1A1, LCP1, PIM1, TFRC, CIITA, NACA, HSPCB, HSP90AA1, HIST1H4I, IL21R, POU2AF1, RHOH, EIF4A2, SRSF3	n		1	BCL6,ENSG00000113916.17,P41182,604,BCL5,BCL6A,LAZ3,ZBTB27
BCL11B	BCL11B, BAF complex component	COSG102032	14	99169287	99271524	14q32.2	y	n	T-ALL			L	Dom	oncogene, TSG, fusion	T	TLX3	n		1	BCL11B,ENSG00000127152.17,Q9C0K0,64919,CTIP-2,CTIP2,hRIT1-alpha
BRAF	B-Raf proto-oncogene, serine/threonine kinase	COSG99109	7	140719327	140924928	7q34	y	n	melanoma, colorectal, papillary thyroid, borderline ovarian, NSCLC, cholangiocarcinoma, pilocytic astrocytoma, Spitzoid tumour, pancreas acinar carcinoma, melanocytic nevus, prostate, gastric			E, O	Dom	oncogene, fusion	Mis, T, O	AKAP9, KIAA1549, CEP88, LSM14A, SND1, FCHSD1, SLC45A3, FAM131B, RNF130, CLCN6, MKRN1, GNAI1, AGTRAP	y	Cardio-facio-cutaneous syndrome	1	BRAF,ENSG00000157764.13,673,BRAF1
AMER1	APC membrane recruitment protein 1	COSG111928	X	64185117	64205744	Xq11.2	y	n	Wilms tumour			O	Rec	TSG	F, D, N, Mis		n		1	AMER1,ENSG00000184675.9,Q5JTC6,139285,FLJ39827,RP11-403E24.2,WTX
ATR	ATR serine/threonine kinase	COSG73559	3	142449235	142578826	3q23	y	y	endometrial, gastric, epithelial ovarian, myeloma	oropharyngeal	familial cutaneous telangiectasia and cancer syndrome	E, L	Dom	TSG	F, Mis		y	Seckel syndrome 1	1	ATR,ENSG00000175054.14,Q13535,545,FRP1,MEC1,SCKL,SCKL1
GENE_SYMBOL	NAME	COSMIC_GENE_ID	CHROMOSOME	GENOME_START	GENOME_STOP	CHR_BAND	SOMATIC	GERMLINE	TUMOUR_TYPES_SOMATIC	TUMOUR_TYPES_GERMLINE	CANCER_SYNDROME	TISSUE_TYPE	MOLECULAR_GENETICS	ROLE_IN_CANCER	MUTATION_TYPES	TRANSLOCATION_PARTNER	OTHER_GERMLINE_MUT	OTHER_SYNDROME	TIER	SYNONYMS
ALK	ALK receptor tyrosine kinase	COSG59677	2	29192774	29921566	2p23.2	y	y	ALCL, NSCLC, neuroblastoma, inflammatory myofibroblastic tumour, Spitzoid tumour	neuroblastoma	familial neuroblastoma	L, E, M	Dom	oncogene, fusion	T, Mis, A	NPM1, TPM3, TFG, TPM4, ATIC, CLTC, MSN, RNF213, CARS, EML4, KIF5B, C2orf22, DCTN1, HIP1, TPR, RANBP2, PPFIBP1, SEC31A, STRN, VCL, C2orf44, KLC1	n		1	ALK,ENSG00000171094.17,Q9UM73,238,CD246
BRCA2	BRCA2, DNA repair associated	COSG68498	13	32315474	32400266	13q13.1	y	y	breast, ovarian, pancreatic	breast, ovarian, pancreatic, leukaemia (FANCB, FANCD1)	hereditary breast/ovarian cancer	L, E	Rec	TSG	D, Mis, N, F, S		n		1	BRCA2,ENSG00000139618.14,P51587,675,BRCC2,FAD,FAD1,XRCC11

## Sheet: Melanoma-Associated Mutations
Gene Acronym	Chromosome location	Somatic Cancer Associations	Germline Cancer Associations	Role in Cancer
A1CF	Chr10:50799409-50885675	melanoma		oncogene
ASPM	Chr1:197084128-197146694	breast cancer, lung cancer, endometrial cancer, melanoma
ATF1	Chr12:50763710-50821122	malignant melanoma of soft parts, angiomatoid fibrous histiocytoma		oncogene, fusion
BAP1	Chr3:52401013-52410350	uveal melanoma, breast, NSCLC, RCC	mesothelioma, skin and uveal melanoma, kidney cancer	TSG
BCLAF1	Chr6:136256627-136289851	melanoma, SCC
BIRC6	Chr2:32357028-32618899	melanoma, gastric adenocarcinoma, lung adenocarcinoma		oncogene, fusion
BRAF	Chr7:140719327-140924928	melanoma, colorectal, papillary thyroid, borderline ovarian, NSCLC, cholangiocarcinoma, pilocytic astrocytoma, Spitzoid tumour, pancreas acinar carcinoma, melanocytic nevus, prostate, gastric		oncogene, fusion
CBLC	Chr19:44777869-44800634	cervical SCC, malignant melanoma
Tumor Mutations
Gene Acronym	Chromosome location	Somatic Cancer Associations	Germline Cancer Associations	Role in Cancer
BAP1	Chr3:52401013-52410350	uveal melanoma, breast, NSCLC, RCC	mesothelioma, skin and uveal melanoma, kidney cancer	TSG
BIRC6	Chr2:32357028-32618899	melanoma, gastric adenocarcinoma, lung adenocarcinoma		oncogene, fusion
BRAF	Chr7:140719327-140924928	melanoma, colorectal, papillary thyroid, borderline ovarian, NSCLC, cholangiocarcinoma, pilocytic astrocytoma, Spitzoid tumour, pancreas acinar carcinoma, melanocytic nevus, prostate, gastric		oncogene, fusion
CBLC	Chr19:44777869-44800634	cervical SCC, malignant melanoma
