# Supplementary material for: Shock-Scattering Micro-Histotripsy-Aided Fine Needle Aspiration for Enhanced Biomarker Profiling and Cytopathology
Source: Research Square preprint supplement (doi:10.21203/rs.3.rs-5939271/v1), 2025-04-23
Supplement: Supplementary file 16 [file Supplementary 6 - qPCR Primers.xlsx]

## Sheet: Sheet1
Unmethylated BRCA Promoter	Taqman Assay ID: AP2XEV2	RED LETTER = bp altered by bisulfite conversion
Forward	TATTTTGAGAGGTTGTTGTTTAGT
Reverse	CAAAAAATCTCAACAAACTCACA
Probe	GGTAATGGAAAAGT
Methylated BRCA Promoter (same sequence location as Unmethylated)	Taqman Assay ID: APZTKA4
Forward	TATTTTGAGAGGTTGTTGTTTAGC
Reverse	CAAAAAATCTCAACGAACTCACG
Probe	GGTAACGGAAAAGC
Bisulfite Conversion Beta-Actin	Taqman Assay ID: APU7AMC
Forward	TGGTGATGGAGGAGGTTTAGTAAGT
Reverse	AACCAATAAAACCTACTCCTCCCTTAA
Probe	ACCACCACCCAACACACAATAACAAACACA
Estrogen Receptor Expression	Taqman Assay ID:
*catalogued primer	Hs01046816_m1
Progesterone Receptor Expression	Taqman Assay ID:
*catalogued primer	Hs01556702_m1
HER2 Receptor Expression	Taqman Assay ID:
*catalogued primer	Hs01001580_m1
Beta-Actin Regular Expression	Taqman Assay ID:
*catalogued primer	Hs99999903_m1
